# Supplementary material for: De novo Transcriptome Sequencing Coupled With Co-expression Analysis Reveal the Transcriptional Regulation of Key Genes Involved in the Formation of Active Ingredients in Peucedanum praeruptorum Dunn Under Bolting Period
Source: Frontiers journal article supplement (doi:10.3389/fgene.2021.683037), 2021-06-14
Supplement: Data_Sheet_5.zip [file Data_Sheet_5.zip]

Gene id	MeanTPM (A)	MeanTPM (B)	log2FoldChange	pValue	qValue	result	CDD	KOG	NR	NT	PFAM	Swissprot	TrEMBL	GO	KEGG
TRINITY_DN68533_c0_g1	18.4530819333	0.0986616666667	7.54715641352	0.000130598810081	0.0373502558108	up	-	-	gi|1021051283|gb|KZN09061.1| hypothetical protein DCAR_001717 [Daucus carota subsp. sativus] 2.1e-41	-	-	-	-	-	-
TRINITY_DN94747_c1_g3	6.701173333330001	0.0001	16.0321261041	0.00010186964095799998	0.0311599827951	up	cd03009, TryX_like_TryX_NRX, Tryparedoxin (TryX)-like family, TryX and nucleoredoxin (NRX) subfamily; TryX and NRX are thioredoxin (TRX)-like protein disulfide oxidoreductases that alter the redox state of target proteins via the reversible oxidation of an active center CXXC motif. TryX is involved in the regulation of oxidative stress in parasitic trypanosomatids by reducing TryX peroxidase, whi…	-	gi|1021031369|gb|KZM89154.1| hypothetical protein DCAR_026229 [Daucus carota subsp. sativus] 1.4e-41	-	-	sp|Q7Y0F2|NRX12_ORYSJ Probable nucleoredoxin 1-2 OS=Oryza sativa subsp. japonica GN=Os03g0405900 PE=2 SV=1 1.74678e-18	tr|M0T3I9|M0T3I9_MUSAM Uncharacterized protein OS=Musa acuminata subsp. malaccensis PE=4 SV=1 5.4e-17	GO:0005623, cell;GO:0045454, cell redox homeostasis;GO:0047134, protein-disulfide reductase activity	-
TRINITY_DN72425_c1_g1	0.0001	45.428466666700004	-18.793237085799998	4.71531918288e-06	0.00327866774858	down	-	-	gi|1021051503|gb|KZN09281.1| hypothetical protein DCAR_001937 [Daucus carota subsp. sativus] 7.2e-39	-	-	-	-	-	-
TRINITY_DN91865_c1_g2	10.2212766667	0.0001	16.6412158787	1.10718450767e-05	0.00677333303334	up	-	-	gi|1021048857|gb|KZN06637.1| hypothetical protein DCAR_007474 [Daucus carota subsp. sativus] 8.8e-23	-	-	-	tr|K4BJX2|K4BJX2_SOLLC Uncharacterized protein OS=Solanum lycopersicum PE=4 SV=1 7.7e-11	GO:0005634, nucleus;GO:0045892, negative regulation of transcription, DNA-templated	-
TRINITY_DN63917_c0_g1	0.0001	18.8474	-17.5240059918	2.7024875868e-05	0.0128333068891	down	-	-	gi|1021042310|gb|KZN00091.1| hypothetical protein DCAR_008845 [Daucus carota subsp. sativus] 4.4e-49	-	-	-	-	-	-
TRINITY_DN86682_c0_g1	116.52833333299999	0.0001	20.152249351600002	1.15679443466e-05	0.007021104615140001	up	-	-	-	-	-	-	-	-	-
TRINITY_DN86682_c0_g2	122.29187666700001	1.1490626666700001	6.73372728399	0.00020137883554400003	0.0488134698158	up	-	-	-	-	-	-	-	-	-
TRINITY_DN84053_c1_g2	7.92855299667	0.030712200000000002	8.01210191991	5.742303858180001e-08	0.000134129777575	up	-	-	-	-	-	-	-	-	-
TRINITY_DN94980_c0_g3	37.4555060029	0.0204113482097	10.8415906184	1.53980122328e-07	0.00026375768420599995	up	-	-	-	-	-	-	-	-	-
TRINITY_DN89243_c1_g1	15.815261333299999	0.0001	17.2709578698	3.43513657996e-05	0.0153287473502	up	-	-	gi|1021048397|gb|KZN06177.1| hypothetical protein DCAR_007014 [Daucus carota subsp. sativus] 5.7e-20	-	-	-	tr|M5XKL9|M5XKL9_PRUPE Uncharacterized protein OS=Prunus persica GN=PRUPE_ppa000426mg PE=4 SV=1 1.6e-11	GO:0005886, plasma membrane	-
TRINITY_DN92063_c2_g1	62.9521333333	0.0001	19.263895743499997	3.19649771345e-09	1.23196218374e-05	up	-	-	-	-	-	-	-	-	-
TRINITY_DN86013_c0_g3	0.0229548	23.915829666799997	-10.0249542633	8.14652470166e-11	7.84938021317e-07	down	-	-	gi|1021038248|gb|KZM96031.1| hypothetical protein DCAR_019273 [Daucus carota subsp. sativus] 1.1e-16	gi|731391330|ref|XM_003632038.2| PREDICTED: Vitis vinifera syntaxin-61 (LOC100257700), mRNA 2.61818e-11	-	sp|Q946Y7|SYP61_ARATH Syntaxin-61 OS=Arabidopsis thaliana GN=SYP61 PE=1 SV=1 4.51275e-11	tr|A0A022PXR4|A0A022PXR4_ERYGU Uncharacterized protein OS=Erythranthe guttata GN=MIMGU_mgv1a011514mg PE=4 SV=1 9.9e-13	GO:0000149, SNARE binding;GO:0005484, SNAP receptor activity;GO:0005622, intracellular;GO:0005802, trans-Golgi network;GO:0006886, intracellular protein transport;GO:0006906, vesicle fusion;GO:0009738, abscisic acid-activated signaling pathway;GO:0016021, integral component of membrane;GO:0031201, SNARE complex;GO:0031902, late endosome membrane;GO:0048193, Golgi vesicle transport;GO:0048278, ves…	-
TRINITY_DN91726_c3_g1	7.94341966667	0.0001	16.277472605299998	4.24086974995e-06	0.00311328306729	up	-	-	gi|1021028951|gb|KZM86736.1| hypothetical protein DCAR_023870 [Daucus carota subsp. sativus] 2.5e-09	-	-	-	tr|F6GWJ1|F6GWJ1_VITVI Putative uncharacterized protein OS=Vitis vinifera GN=VIT_05s0029g01200 PE=3 SV=1 1.8e-07	GO:0000049, tRNA binding;GO:0004825, methionine-tRNA ligase activity;GO:0005524, ATP binding;GO:0005829, cytosol;GO:0006418, tRNA aminoacylation for protein translation;GO:0006431, methionyl-tRNA aminoacylation	-
TRINITY_DN74963_c2_g4	7.25210531997	0.0001	16.146112256600002	0.00010022216213200001	0.030778186061700002	up	-	-	-	-	-	-	-	-	-
TRINITY_DN77228_c0_g3	10.0968185	0.153321	6.0412016493	9.55090714457e-05	0.030282064862599996	up	-	-	-	-	-	-	-	-	-
TRINITY_DN79175_c3_g3	8.193017999999999	0.0001	16.322107364	1.56554718156e-05	0.00880843122985	up	-	-	-	-	-	-	-	-	-
TRINITY_DN80659_c1_g1	6.02649333333	0.0001	15.8790311574	0.00013097961026899997	0.0373502558108	up	-	-	-	-	-	-	-	-	-
TRINITY_DN72000_c1_g3	0.454276	6.216525	-3.7744673548	6.74034422483e-05	0.0237241650017	down	-	-	gi|1021050473|gb|KZN08251.1| hypothetical protein DCAR_001316 [Daucus carota subsp. sativus] 6.9e-07	-	-	-	-	-	-
TRINITY_DN89797_c1_g1	14.032139666700001	0.0001	17.098375487000002	0.000143564182304	0.03995023213130001	up	-	-	-	-	-	-	-	-	-
TRINITY_DN69647_c0_g3	0.8593846666670001	128.141656233	-7.220219790800001	4.33413180549e-09	1.51856158105e-05	down	COG0545, FkpA, FKBP-type peptidyl-prolyl cis-trans isomerases 1 [Posttranslational modification, protein turnover, chaperones]. 1.77815e-09	KOG0544, KOG0544, KOG0544, FKBP-type peptidyl-prolyl cis-trans isomerase [Posttranslational modification, protein turnover, chaperones]. 6.39362e-13	gi|1021054315|gb|KZN12093.1| hypothetical protein DCAR_004749 [Daucus carota subsp. sativus] 5.0e-28	-	pfam00254, FKBP_C, FKBP-type peptidyl-prolyl cis-trans isomerase. 6.50988e-09	sp|Q38931|FKB62_ARATH Peptidyl-prolyl cis-trans isomerase FKBP62 OS=Arabidopsis thaliana GN=FKBP62 PE=1 SV=2 1.27362e-25	tr|V4L0E9|V4L0E9_EUTSA Uncharacterized protein OS=Eutrema salsugineum GN=EUTSA_v10002468mg PE=4 SV=1 2.7e-26	GO:0003755, peptidyl-prolyl cis-trans isomerase activity;GO:0005528, FK506 binding;GO:0005634, nucleus;GO:0005789, endoplasmic reticulum membrane;GO:0006457, protein folding;GO:0061077, chaperone-mediated protein folding;GO:0070370, cellular heat acclimation	-
TRINITY_DN91793_c0_g4	0.0001	6.14371	-15.906822498	2.35262261586e-06	0.00210414293881	down	-	-	-	-	-	-	-	-	-
TRINITY_DN91793_c0_g1	1.9674630000000002	5.32457283333	-1.43632928426	9.80273028591e-05	0.0305471576837	down	-	-	gi|902133972|gb|KNA04372.1| hypothetical protein SOVF_200350 [Spinacia oleracea] 1.1e-48	-	-	sp|Q3E6S8|DGP14_ARATH Putative protease Do-like 14 OS=Arabidopsis thaliana GN=DEGP14 PE=3 SV=2 4.01818e-14	tr|A0A0K9QAR1|A0A0K9QAR1_SPIOL Uncharacterized protein OS=Spinacia oleracea GN=SOVF_200350 PE=4 SV=1 8.6e-49	GO:0004252, serine-type endopeptidase activity	-
TRINITY_DN81877_c1_g1	0.0001	10.1936488057	-16.6373110295	8.560413448860001e-08	0.00016919327935000002	down	-	-	-	-	-	-	-	-	-
TRINITY_DN70454_c0_g1	10.997599000000001	2.35242163333	2.2249700203	0.000164609898704	0.04339536153490001	up	-	-	-	-	-	-	-	-	-
TRINITY_DN96133_c1_g1	0.518585701594	25.7049673667	-5.631320941449999	1.17981019219e-06	0.0013373842534400002	down	pfam00083, Sugar_tr, Sugar (and other) transporter. 2.53849e-24	KOG0254, KOG0254, KOG0254, Predicted transporter (major facilitator superfamily) [General function prediction only]. 3.86273e-26	gi|1021051998|gb|KZN09776.1| hypothetical protein DCAR_002432 [Daucus carota subsp. sativus] 1.5e-56	-	pfam00083, Sugar_tr, Sugar (and other) transporter. 5.16895e-25	sp|Q8LBI9|EDL16_ARATH Sugar transporter ERD6-like 16 OS=Arabidopsis thaliana GN=At5g18840 PE=2 SV=2 2.99059e-96	tr|A0A0D4L3Z9|A0A0D4L3Z9_CAMSI Sugar transporter ERD6-like 16 OS=Camellia sinensis GN=ERD6.16 PE=2 SV=1 1.9e-48	GO:0005351, carbohydrate:proton symporter activity;GO:0005355, glucose transmembrane transporter activity;GO:0005887, integral component of plasma membrane;GO:0008643, carbohydrate transport;GO:0016021, integral component of membrane;GO:0046323, glucose import	-
TRINITY_DN79175_c2_g1	0.0001	12.13183	-16.8884376616	0.00019328493155700002	0.047925551476099996	down	-	-	-	-	-	-	-	-	-
TRINITY_DN79398_c0_g1	6.262255033330001	0.0001	15.9343946437	3.11675136182e-07	0.00048049085694300004	up	-	-	-	-	-	-	-	-	-
TRINITY_DN87621_c0_g2	0.0001	11.2554009	-16.7802579187	5.22871042263e-05	0.020253239035	down	-	-	-	-	-	-	-	-	-
TRINITY_DN82509_c1_g6	0.182820866667	14.948215666700001	-6.353398728359999	0.000210713707332	0.0499761045803	down	-	-	-	-	-	-	-	-	-
TRINITY_DN74505_c5_g1	9.431617566669999	0.473905	4.31483543357	9.27921833963e-10	5.193346775580001e-06	up	-	-	-	-	-	-	-	-	-
TRINITY_DN96106_c0_g1	8.363514	44.3146666667	-2.40560312631	8.90569411771e-06	0.00562679273755	down	PLN02650, PLN02650, dihydroflavonol-4-reductase. 4.60756e-08	-	gi|1021036504|gb|KZM94287.1| hypothetical protein DCAR_017530 [Daucus carota subsp. sativus] 3.3e-20	gi|5924378|gb|AF184272.1|AF184272 Daucus carota dihydroflavonol 4-reductase like (DFR2) mRNA, partial cds 2.43833e-40	-	sp|P51102|DFRA_ARATH Dihydroflavonol-4-reductase OS=Arabidopsis thaliana GN=DFRA PE=1 SV=2 2.49245e-06	tr|Q9SP51|Q9SP51_DAUCA Dihydroflavonol 4-reductase like (Fragment) OS=Daucus carota GN=DFR2 PE=2 SV=1 5.7e-17	GO:0003824, catalytic activity;GO:0009718, anthocyanin-containing compound biosynthetic process;GO:0042406, extrinsic component of endoplasmic reticulum membrane;GO:0045552, dihydrokaempferol 4-reductase activity;GO:0050662, coenzyme binding	-
TRINITY_DN74583_c1_g3	5.729515333330001	0.0001	15.8061254844	0.000177641037899	0.045795740747	up	-	-	-	-	-	-	-	-	-
TRINITY_DN99007_c11_g2	11.2124533333	0.18365933333299997	5.93192595652	0.00011729006241399999	0.034772894580800004	up	-	-	-	-	-	-	-	-	-
TRINITY_DN71695_c0_g1	7.412299333330001	0.0001	16.1776335229	1.2631278707499999e-09	5.72731897253e-06	up	-	-	-	-	-	-	-	-	-
TRINITY_DN97380_c0_g3	10.0755443	0.537152333333	4.22938268144	6.10633889058e-07	0.000818414719607	up	-	-	gi|1021050142|gb|KZN07920.1| hypothetical protein DCAR_000589 [Daucus carota subsp. sativus] 1.1e-37	-	-	-	tr|A0A061DWH6|A0A061DWH6_THECC Uncharacterized protein OS=Theobroma cacao GN=TCM_003954 PE=4 SV=1 1.1e-13	-	-
TRINITY_DN69617_c2_g2	0.0001	26.889806	-18.0366998212	1.02273117694e-05	0.006401221959159999	down	-	-	gi|1021034966|gb|KZM92750.1| hypothetical protein DCAR_019885 [Daucus carota subsp. sativus] 4.0e-23	-	-	-	-	-	-
TRINITY_DN87938_c2_g2	10.3396933333	0.0001	16.6578338716	6.57359735079e-05	0.0235395060782	up	-	-	-	-	-	-	-	-	-
TRINITY_DN75258_c0_g3	0.0001	23.1588466667	-17.8212038819	2.08750120594e-05	0.010799246171600002	down	-	-	gi|947055976|gb|KRH05429.1| hypothetical protein GLYMA_17G227100 [Glycine max] 2.2e-14	-	-	sp|Q8RWH8|NIPA9_ARATH Probable magnesium transporter NIPA9 OS=Arabidopsis thaliana GN=At5g11960 PE=2 SV=1 3.8237e-15	tr|A0A0R0FS85|A0A0R0FS85_SOYBN Uncharacterized protein OS=Glycine max GN=GLYMA_17G227100 PE=4 SV=1 1.7e-14	GO:0005769, early endosome;GO:0005886, plasma membrane;GO:0015095, magnesium ion transmembrane transporter activity;GO:0015693, magnesium ion transport;GO:0016021, integral component of membrane	-
TRINITY_DN81800_c3_g1	12.7864289	0.109124666667	6.8724923354100005	1.22923952872e-07	0.00022700427516699997	up	-	-	-	-	-	-	-	-	-
TRINITY_DN94598_c1_g5	0.0001	5.15864566667	-15.654704734600001	4.49741129681e-05	0.018200914708599997	down	-	-	-	gi|1000973759|ref|XR_001535006.1| PREDICTED: Ricinus communis uncharacterized LOC8274514 (LOC8274514), ncRNA 2.6604e-11	-	-	-	-	-
TRINITY_DN74086_c2_g6	10.85845	0.0001	16.7284586534	0.00019905466234799998	0.0488134698158	up	-	-	-	-	-	-	-	-	-
TRINITY_DN74398_c1_g1	0.0001	7.675867666669999	-16.228042219000002	1.45777567034e-05	0.00832357512747	down	-	-	-	-	-	-	-	-	-
TRINITY_DN76532_c0_g1	0.0001	12.9780133333	-16.9857100278	2.40217662509e-06	0.00210414293881	down	cd00161, RICIN, Ricin-type beta-trefoil; Carbohydrate-binding domain formed from presumed gene triplication. The domain is found in a variety of molecules serving diverse functions such as enzymatic activity, inhibitory toxicity and signal transduction. Highly specific ligand binding occurs on exposed surfaces of the compact domain sturcture. 4.49747e-07	-	gi|255585867|ref|XP_002533608.1| PREDICTED: ricin-like [Ricinus communis] 2.4e-55	-	-	sp|P02879|RICI_RICCO Ricin OS=Ricinus communis PE=1 SV=1 5.7835e-62	tr|B9T5T9|B9T5T9_RICCO rRNA N-glycosidase OS=Ricinus communis GN=RCOM_1180940 PE=3 SV=1 1.8e-55	GO:0000166, nucleotide binding;GO:0005783, endoplasmic reticulum;GO:0006952, defense response;GO:0008152, metabolic process;GO:0016021, integral component of membrane;GO:0017148, negative regulation of translation;GO:0030246, carbohydrate binding;GO:0030598, rRNA N-glycosylase activity;GO:0031640, killing of cells of other organism	-
TRINITY_DN98635_c1_g1	8.34991333333	0.148790466667	5.81040722556	6.381405747319999e-07	0.000833714436974	up	-	KOG0498, KOG0498, KOG0498, K+-channel ERG and related proteins, contain PAS/PAC sensor domain [Inorganic ion transport and metabolism, Signal transduction mechanisms]. 4.31508e-38	gi|1021028132|gb|KZM85919.1| hypothetical protein DCAR_026659 [Daucus carota subsp. sativus] 2.6e-92	-	-	sp|O65718|CNGC2_ARATH Cyclic nucleotide-gated ion channel 2 OS=Arabidopsis thaliana GN=CNGC2 PE=1 SV=1 1.2122e-102	tr|A0A0V0IQ81|A0A0V0IQ81_SOLCH Putative cyclic nucleotide-gated ion channel 2-like OS=Solanum chacoense PE=4 SV=1 5.0e-59	GO:0005216, ion channel activity;GO:0005221, intracellular cyclic nucleotide activated cation channel activity;GO:0005222, intracellular cAMP activated cation channel activity;GO:0005242, inward rectifier potassium channel activity;GO:0005262, calcium channel activity;GO:0005516, calmodulin binding;GO:0005622, intracellular;GO:0005887, integral component of plasma membrane;GO:0006952, defense res…	-
TRINITY_DN90778_c0_g1	5.5992610760899995	0.8121283666670001	2.78545676412	1.90924462182e-05	0.0103508734603	up	-	-	-	-	-	-	-	-	-
TRINITY_DN92573_c2_g1	0.43661516666699995	97.953039	-7.8095841966899995	1.27924589074e-06	0.00140426344925	down	cd01837, SGNH_plant_lipase_like, SGNH_plant_lipase_like, a plant specific subfamily of the SGNH-family of hydrolases, a diverse family of lipases and esterases. The tertiary fold of the enzyme is substantially different from that of the alpha/beta hydrolase family and unique among all known hydrolases; its active site closely resembles the Ser-His-Asp(Glu) triad found in other serine hydrolases. …	-	gi|1021023150|gb|KZM80950.1| hypothetical protein DCAR_031436 [Daucus carota subsp. sativus] 4.7e-21	-	-	sp|Q93YW8|GDL65_ARATH GDSL esterase/lipase At4g18970 OS=Arabidopsis thaliana GN=At4g18970 PE=2 SV=1 7.62052e-21	tr|A0A0J8BQR5|A0A0J8BQR5_BETVU Uncharacterized protein OS=Beta vulgaris subsp. vulgaris GN=BVRB_8g188220 PE=4 SV=1 2.3e-20	GO:0005576, extracellular region;GO:0016042, lipid catabolic process;GO:0016788, hydrolase activity, acting on ester bonds	-
TRINITY_DN69730_c0_g1	0.231654551012	9.86600048566	-5.4124184278600005	1.1089380488399999e-06	0.0012951388284999999	down	cd01647, RT_LTR, RT_LTR: Reverse transcriptases (RTs) from retrotransposons and retroviruses which have long terminal repeats (LTRs) in their DNA copies but not in their RNA template. RT catalyzes DNA replication from an RNA template, and is responsible for the replication of retroelements. An RT gene is usually indicative of a mobile element such as a retrotransposon or retrovirus. RTs are prese…	-	gi|147774273|emb|CAN76793.1| hypothetical protein VITISV_026680 [Vitis vinifera] 0.0e+00	gi|902640246|gb|KR002656.1| Coriandrum sativum chloroplast, complete genome 1.28251e-85	pfam00078, RVT_1, Reverse transcriptase (RNA-dependent DNA polymerase). A reverse transcriptase gene is usually indicative of a mobile element such as a retrotransposon or retrovirus. Reverse transcriptases occur in a variety of mobile elements, including retrotransposons, retroviruses, group II introns, bacterial msDNAs, hepadnaviruses, and caulimoviruses. 6.30435e-18	sp|Q7LHG5|YI31B_YEAST Transposon Ty3-I Gag-Pol polyprotein OS=Saccharomyces cerevisiae (strain ATCC 204508 / S288c) GN=TY3B-I PE=3 SV=2 4.2743e-150	tr|A5BEK1|A5BEK1_VITVI Putative uncharacterized protein OS=Vitis vinifera GN=VITISV_026680 PE=4 SV=1 0.0e+00	GO:0000943, retrotransposon nucleocapsid;GO:0003676, nucleic acid binding;GO:0003677, DNA binding;GO:0003723, RNA binding;GO:0003887, DNA-directed DNA polymerase activity;GO:0003964, RNA-directed DNA polymerase activity;GO:0004190, aspartic-type endopeptidase activity;GO:0004523, RNA-DNA hybrid ribonuclease activity;GO:0004540, ribonuclease activity;GO:0005524, ATP binding;GO:0005634, nucleus;GO:…	-
TRINITY_DN96244_c1_g1	2.01159366667	29.2197496667	-3.8605329968	4.21274105527e-05	0.0174584143023	down	-	-	-	-	-	-	-	-	-
TRINITY_DN92227_c1_g5	0.0001	10.5428735324	-16.685908611400002	3.98248396776e-13	1.3681215164700002e-08	down	TIGR02037, Probable_periplasmic_serine_protease_do/HhoA-like, periplasmic serine protease, Do/DeqQ family. This family consists of a set proteins various designated DegP, heat shock protein HtrA, and protease DO. The ortholog in Pseudomonas aeruginosa is designated MucD and is found in an operon that controls mucoid phenotype. This family also includes the DegQ (HhoA) paralog in E. coli which can…	-	gi|1000959958|ref|XP_015576305.1| PREDICTED: probable periplasmic serine endoprotease DegP-like isoform X1 [Ricinus communis] 1.4e-38	-	-	sp|P54925|DEGPL_BARHE Probable periplasmic serine endoprotease DegP-like OS=Bartonella henselae (strain ATCC 49882 / DSM 28221 / Houston 1) GN=htrA PE=3 SV=2 1.60199e-08	tr|B9S6N1|B9S6N1_RICCO Putative uncharacterized protein OS=Ricinus communis GN=RCOM_1111160 PE=4 SV=1 1.1e-38	GO:0004252, serine-type endopeptidase activity;GO:0030288, outer membrane-bounded periplasmic space	-
TRINITY_DN89930_c2_g5	8.64297033333	0.380789333333	4.504462237659999	2.49966795124e-05	0.0123512439114	up	-	-	gi|661876240|emb|CDP19632.1| unnamed protein product [Coffea canephora] 4.2e-50	-	-	sp|Q39962|CBPR_HEVBR Citrate-binding protein OS=Hevea brasiliensis GN=CBP PE=1 SV=1 5.33258e-58	tr|A0A068VG98|A0A068VG98_COFCA Uncharacterized protein OS=Coffea canephora GN=GSCOC_T00006184001 PE=4 SV=1 3.2e-50	GO:0005773, vacuole	-
TRINITY_DN70638_c1_g2	0.0001	20.6267766667	-17.6541588642	1.19130279297e-08	3.40103710694e-05	down	-	-	-	gi|663681259|emb|HG975520.1| Solanum lycopersicum chromosome ch08, complete genome 4.60095e-15	pfam03759, PRONE, PRONE (Plant-specific Rop nucleotide exchanger). This is a functional guanine exchange factor (GEF) of plant Rho GTPase. 3.65809e-06	sp|F4K295|ROGF5_ARATH Rop guanine nucleotide exchange factor 5 OS=Arabidopsis thaliana GN=ROPGEF5 PE=2 SV=1 3.23786e-07	-	GO:0005089, Rho guanyl-nucleotide exchange factor activity	-
TRINITY_DN84089_c1_g1	9.05136	0.0001	16.4658469582	6.28740709298e-05	0.0228606562991	up	-	-	-	-	-	-	-	-	-
TRINITY_DN93861_c1_g2	19.9599333333	0.544137	5.19699316031	0.000135766703214	0.03833395244380001	up	smart00205, THN, Thaumatin family. The thaumatin family gathers proteins related to plant pathogenesis. The thaumatin family includes very basic members with extracellular and vacuolar localization. Thaumatin itsel is a potent sweet-tasting protein. Several members of this family display significant in vitro activity of inhibiting hyphal growth or spore germination of various fungi probably by a …	-	gi|1009168667|ref|XP_015902783.1| PREDICTED: thaumatin-like protein [Ziziphus jujuba] 1.0e-60	-	pfam00314, Thaumatin, Thaumatin family. 5.62818e-39	sp|P81370|TLP_ACTDE Thaumatin-like protein OS=Actinidia deliciosa GN=tlp PE=1 SV=2 2.15458e-66	tr|A0A0K2G611|A0A0K2G611_9GENT Thaumatin-like protein (Fragment) OS=Cryptostegia grandiflora PE=2 SV=1 5.2e-60	GO:0005576, extracellular region;GO:0031640, killing of cells of other organism;GO:0050832, defense response to fungus	-
TRINITY_DN79108_c2_g4	0.0001	12.026833333299999	-16.8758973052	7.831557737789999e-08	0.000163154630688	down	-	-	-	-	-	-	-	-	-
TRINITY_DN69571_c1_g2	0.892858233333	7.065488233330001	-2.98428622616	2.40041071913e-05	0.0119373199388	down	-	KOG0054, KOG0054, KOG0054, Multidrug resistance-associated protein/mitoxantrone resistance protein, ABC superfamily [Secondary metabolites biosynthesis, transport and catabolism]. 1.01549e-09	gi|1009111257|ref|XP_015900141.1| PREDICTED: ABC transporter C family member 3-like isoform X2 [Ziziphus jujuba] 1.0e-16	-	-	sp|Q9LK64|AB3C_ARATH ABC transporter C family member 3 OS=Arabidopsis thaliana GN=ABCC3 PE=1 SV=1 4.9049e-22	tr|M5XJA0|M5XJA0_PRUPE Uncharacterized protein (Fragment) OS=Prunus persica GN=PRUPE_ppa017819m3g PE=4 SV=1 3.9e-16	GO:0000325, plant-type vacuole;GO:0005524, ATP binding;GO:0005773, vacuole;GO:0005774, vacuolar membrane;GO:0008559, xenobiotic transmembrane transporting ATPase activity;GO:0009506, plasmodesma;GO:0010290, chlorophyll catabolite transmembrane transporter activity;GO:0015431, glutathione S-conjugate-exporting ATPase activity;GO:0016021, integral component of membrane;GO:0042626, ATPase activity, …	-
TRINITY_DN74619_c1_g4	0.12215566666699999	6.173087666669999	-5.65919958454	0.000193363515595	0.047925551476099996	down	-	-	-	-	-	-	-	-	-
TRINITY_DN71855_c4_g2	16.8210139667	72.0586276667	-2.0989065028400002	5.35239553567e-07	0.000736738129787	down	PTZ00146, PTZ00146, fibrillarin; Provisional. 3.16225e-36	KOG1596, KOG1596, KOG1596, Fibrillarin and related nucleolar RNA-binding proteins [RNA processing and modification]. 5.06259e-38	gi|84468374|dbj|BAE71270.1| putative fibrillarin homolog [Trifolium pratense] 9.3e-52	-	pfam01269, Fibrillarin, Fibrillarin. 3.61249e-33	sp|Q9FEF8|MD36B_ARATH Probable mediator of RNA polymerase II transcription subunit 36b OS=Arabidopsis thaliana GN=MED36B PE=1 SV=1 9.96171e-42	tr|Q2PET2|Q2PET2_TRIPR Putative fibrillarin homolog OS=Trifolium pratense PE=2 SV=1 7.1e-52	GO:0000494, box C/D snoRNA 3'-end processing;GO:0003723, RNA binding;GO:0005730, nucleolus;GO:0006351, transcription, DNA-templated;GO:0006355, regulation of transcription, DNA-templated;GO:0006364, rRNA processing;GO:0008033, tRNA processing;GO:0008168, methyltransferase activity;GO:0008649, rRNA methyltransferase activity;GO:0015030, Cajal body;GO:0016020, membrane;GO:0030515, snoRNA binding;GO…	-
TRINITY_DN77621_c1_g1	0.0001	10.5468	-16.6864458123	1.98089066724e-05	0.010458288658399999	down	-	-	gi|1021020382|gb|KZM80243.1| hypothetical protein DCAR_032144 [Daucus carota subsp. sativus] 6.5e-60	-	-	-	-	-	-
TRINITY_DN97720_c2_g5	8.021175999999999	0.0001	16.291526148	8.244044494920001e-09	2.44410552983e-05	up	-	-	-	-	-	-	-	-	-
TRINITY_DN91612_c1_g3	0.0001	23.08579	-17.816645577	1.18512697484e-09	5.7094973421599995e-06	down	-	-	-	-	-	-	-	-	-
TRINITY_DN68510_c0_g1	0.0001	6.27876	-15.938192047200001	0.000130826516012	0.0373502558108	down	-	-	gi|1021023633|gb|KZM81421.1| hypothetical protein DCAR_029034 [Daucus carota subsp. sativus] 7.0e-92	-	-	-	-	-	-
TRINITY_DN80442_c1_g7	0.0001	17.5562666667	-17.4216265634	6.6973840296e-05	0.0237241650017	down	cd02396, PCBP_like_KH, K homology RNA-binding domain, PCBP_like. Members of this group possess KH domains in a tandem arrangement. Most members, similar to the poly(C) binding proteins (PCBPs) and Nova, containing three KH domains, with the first and second domains, which are represented here, in tandem arrangement, followed by a large spacer region, with the third domain near the C-terminal end …	KOG2190, KOG2190, KOG2190, PolyC-binding proteins alphaCP-1 and related KH domain proteins [RNA processing and modification, General function prediction only]. 1.6244e-18	gi|1021044551|gb|KZN02332.1| hypothetical protein DCAR_011086 [Daucus carota subsp. sativus] 1.1e-49	-	-	sp|F4KDN0|HEN4_ARATH KH domain-containing protein HEN4 OS=Arabidopsis thaliana GN=HEN4 PE=1 SV=1 8.40807e-18	tr|A0A022R1D7|A0A022R1D7_ERYGU Uncharacterized protein OS=Erythranthe guttata GN=MIMGU_mgv1a004110mg PE=4 SV=1 2.6e-46	GO:0003723, RNA binding	-
TRINITY_DN97010_c0_g1	0.0478486	31.9353440386	-9.382461563789999	3.5631997263e-05	0.015605600074	down	pfam07727, RVT_2, Reverse transcriptase (RNA-dependent DNA polymerase). A reverse transcriptase gene is usually indicative of a mobile element such as a retrotransposon or retrovirus. Reverse transcriptases occur in a variety of mobile elements, including retrotransposons, retroviruses, group II introns, bacterial msDNAs, hepadnaviruses, and caulimoviruses. This Pfam entry includes reverse transc…	KOG2562, KOG2562, KOG2562, Protein phosphatase 2 regulatory subunit [RNA processing and modification]. 6.46638e-18	gi|147773688|emb|CAN74194.1| hypothetical protein VITISV_040578 [Vitis vinifera] 1.8e-204	gi|932283106|gb|CP012615.1| Oryza sativa Indica Group cultivar RP Bio-226 chromosome 7 sequence 4.06918e-25	pfam07727, RVT_2, Reverse transcriptase (RNA-dependent DNA polymerase). A reverse transcriptase gene is usually indicative of a mobile element such as a retrotransposon or retrovirus. Reverse transcriptases occur in a variety of mobile elements, including retrotransposons, retroviruses, group II introns, bacterial msDNAs, hepadnaviruses, and caulimoviruses. This Pfam entry includes reverse transc…	sp|P10978|POLX_TOBAC Retrovirus-related Pol polyprotein from transposon TNT 1-94 OS=Nicotiana tabacum PE=2 SV=1 9.37201e-100	tr|A5B5M2|A5B5M2_VITVI Putative uncharacterized protein OS=Vitis vinifera GN=VITISV_040578 PE=4 SV=1 1.4e-204	GO:0003676, nucleic acid binding;GO:0003964, RNA-directed DNA polymerase activity;GO:0004190, aspartic-type endopeptidase activity;GO:0004519, endonuclease activity;GO:0008270, zinc ion binding;GO:0015074, DNA integration	-
TRINITY_DN72769_c1_g5	0.06987473333330001	103.560789	-10.533419369299999	3.06624736013e-06	0.00254142450552	down	cd03009, TryX_like_TryX_NRX, Tryparedoxin (TryX)-like family, TryX and nucleoredoxin (NRX) subfamily; TryX and NRX are thioredoxin (TRX)-like protein disulfide oxidoreductases that alter the redox state of target proteins via the reversible oxidation of an active center CXXC motif. TryX is involved in the regulation of oxidative stress in parasitic trypanosomatids by reducing TryX peroxidase, whi…	-	gi|1021041594|gb|KZM99375.1| hypothetical protein DCAR_013263 [Daucus carota subsp. sativus] 2.0e-46	-	-	sp|Q7Y0E8|NRX11_ORYSJ Probable nucleoredoxin 1-1 OS=Oryza sativa subsp. japonica GN=Os03g0405500 PE=2 SV=1 3.9516e-21	tr|M5XEB6|M5XEB6_PRUPE Uncharacterized protein OS=Prunus persica GN=PRUPE_ppa003530mg PE=4 SV=1 6.0e-22	GO:0005623, cell;GO:0045454, cell redox homeostasis;GO:0047134, protein-disulfide reductase activity	-
TRINITY_DN72769_c1_g4	0.8299249022059999	87.4486803333	-6.71931200617	4.12613453326e-07	0.0005991650758819999	down	cd03009, TryX_like_TryX_NRX, Tryparedoxin (TryX)-like family, TryX and nucleoredoxin (NRX) subfamily; TryX and NRX are thioredoxin (TRX)-like protein disulfide oxidoreductases that alter the redox state of target proteins via the reversible oxidation of an active center CXXC motif. TryX is involved in the regulation of oxidative stress in parasitic trypanosomatids by reducing TryX peroxidase, whi…	-	gi|1021042081|gb|KZM99862.1| hypothetical protein DCAR_012776 [Daucus carota subsp. sativus] 1.4e-71	-	-	sp|Q7Y0F2|NRX12_ORYSJ Probable nucleoredoxin 1-2 OS=Oryza sativa subsp. japonica GN=Os03g0405900 PE=2 SV=1 3.0367e-17	tr|W9S1Q2|W9S1Q2_9ROSA Putative nucleoredoxin 1 OS=Morus notabilis GN=L484_027762 PE=4 SV=1 4.4e-25	GO:0005623, cell;GO:0045454, cell redox homeostasis;GO:0047134, protein-disulfide reductase activity	-
TRINITY_DN85177_c2_g1	0.0001	8.200746	-16.3234675334	0.000115227260132	0.034426153742400004	down	-	-	gi|731314048|ref|XP_010684006.1| PREDICTED: transmembrane protein 147 [Beta vulgaris subsp. vulgaris] 1.2e-16	gi|720024972|ref|XM_010265501.1| PREDICTED: Nelumbo nucifera transmembrane protein 147-like (LOC104601976), transcript variant X3, mRNA 1.70241e-18	-	-	tr|A0A0J8D4P4|A0A0J8D4P4_BETVU Uncharacterized protein OS=Beta vulgaris subsp. vulgaris GN=BVRB_1g012910 PE=4 SV=1 9.5e-17	GO:0016021, integral component of membrane	-
TRINITY_DN77219_c1_g3	12.700667	0.0001	16.9545447393	0.00020447007893500003	0.049122753472699995	up	-	-	gi|1021051283|gb|KZN09061.1| hypothetical protein DCAR_001717 [Daucus carota subsp. sativus] 4.3e-20	-	-	-	-	-	-
TRINITY_DN97582_c1_g1	0.0001	5.55864119589	-15.7624446403	2.4284742556499998e-09	9.85219224072e-06	down	-	-	-	-	-	-	-	-	-
TRINITY_DN78361_c1_g6	7.461353333330001	0.0001	16.1871497084	0.000206195093968	0.0493600317801	up	-	-	-	-	-	-	-	-	-
TRINITY_DN73293_c1_g3	8.18002806667	0.012647933333299999	9.33706031456	6.59626542238e-05	0.0235395060782	up	-	-	-	-	-	-	-	-	-
TRINITY_DN95762_c1_g2	0.0001	5.41594	-15.724924135799998	1.95659700229e-05	0.0104012696642	down	-	-	-	-	-	-	-	-	-
TRINITY_DN85718_c0_g1	8.2204	0.0001	16.3269209759	0.000152190292946	0.0415997594356	up	-	-	-	-	-	-	-	-	-
TRINITY_DN90763_c2_g4	14.6357	0.0001	17.1591322234	0.00011664853706200001	0.0347162259992	up	-	-	-	-	-	-	-	-	-
TRINITY_DN75407_c1_g7	25.2983766667	0.0001	17.9486852882	4.67868135545e-10	3.2785646931e-06	up	-	-	-	-	-	-	-	-	-
TRINITY_DN73521_c0_g1	6.493789133330001	0.5198914000000001	3.64277834253	3.6722759324e-06	0.0028884323818499998	up	-	-	gi|985452009|ref|XP_015386531.1| PREDICTED: uncharacterized protein LOC107177356 [Citrus sinensis] 3.8e-27	-	pfam03732, Retrotrans_gag, Retrotransposon gag protein. Gag or Capsid-like proteins from LTR retrotransposons. There is a central motif QGXXEXXXXXFXXLXXH that is common to Retroviridae gag-proteins, but is poorly conserved. 6.3633e-06	-	tr|Q8RU68|Q8RU68_ORYSA Putative 22 kDa kafirin cluster; Ty3-Gypsy type OS=Oryza sativa GN=OSJNBa0022D10.4 PE=4 SV=1 4.9e-27	GO:0003676, nucleic acid binding;GO:0004190, aspartic-type endopeptidase activity;GO:0008270, zinc ion binding;GO:0015074, DNA integration	-
TRINITY_DN86450_c0_g1	0.680159666667	5.841203333330001	-3.1023202439599995	1.40163856851e-06	0.00148001512517	down	-	-	gi|1021024587|gb|KZM82375.1| hypothetical protein DCAR_029944 [Daucus carota subsp. sativus] 3.0e-52	-	-	-	tr|K4DI33|K4DI33_SOLLC Uncharacterized protein OS=Solanum lycopersicum PE=4 SV=1 3.1e-41	GO:0003824, catalytic activity	-
TRINITY_DN90661_c0_g1	0.0001	5.29340456667	-15.6919083007	1.35213005807e-05	0.007956098407319999	down	-	-	gi|1021048324|gb|KZN06104.1| hypothetical protein DCAR_006941 [Daucus carota subsp. sativus] 4.1e-11	-	-	-	tr|B9RDV6|B9RDV6_RICCO Putative uncharacterized protein OS=Ricinus communis GN=RCOM_1616210 PE=4 SV=1 2.0e-10	-	-
TRINITY_DN78634_c0_g2	5.380676	0.0001	15.715499816400001	5.94297861553e-09	1.83238671057e-05	up	-	-	-	-	-	-	-	-	-
TRINITY_DN71597_c2_g2	6.50756433333	0.0001	15.989830048599998	4.97292454174e-05	0.0195572943636	up	-	-	gi|1021028640|gb|KZM86425.1| hypothetical protein DCAR_023559 [Daucus carota subsp. sativus] 2.2e-30	-	-	-	-	-	-
TRINITY_DN87174_c1_g1	10.6410733333	0.0001	16.699284153	3.88654325987e-05	0.0166434737532	up	-	-	-	-	-	-	-	-	-
TRINITY_DN73279_c2_g4	0.231579	15.083663	-6.0253385798800005	0.00011944182050700001	0.035140513008900004	down	-	-	-	-	-	-	-	-	-
TRINITY_DN85050_c2_g3	6.137760506669999	0.012687433333299998	8.918168301589999	0.000183898937905	0.046666053152	up	-	-	-	-	-	-	-	-	-
TRINITY_DN75764_c1_g6	0.0001	22.2270333333	-17.7619558776	3.91802764587e-11	4.3144200999899996e-07	down	-	-	-	-	-	-	-	-	-
TRINITY_DN80679_c1_g4	5.83504	0.0001	15.8324549254	0.000155067129115	0.041959983866699996	up	-	-	-	-	-	-	-	-	-
TRINITY_DN69772_c1_g1	215.342848	0.983842666667	7.7739920717199995	4.60392644161e-06	0.00325944434599	up	-	-	-	gi|10121317|gb|AF181777.1|AF181777 Thesium carinatum 26S ribosomal RNA, partial sequence 1.28775e-14	-	-	-	-	-
TRINITY_DN81347_c0_g1	5.403571969650001	1.2033752	2.16682686962	4.35324081631e-05	0.0178487504576	up	PLN03077, PLN03077, Protein ECB2; Provisional. 3.95875e-67	-	gi|1021041899|gb|KZM99680.1| hypothetical protein DCAR_012958 [Daucus carota subsp. sativus] 2.9e-308	gi|802540576|ref|XM_012221876.1| PREDICTED: Jatropha curcas pentatricopeptide repeat-containing protein At1g71460, chloroplastic (LOC105638132), mRNA 3.23566e-122	-	sp|Q9C9I3|PP115_ARATH Pentatricopeptide repeat-containing protein At1g71460, chloroplastic OS=Arabidopsis thaliana GN=PCMP-A3 PE=2 SV=1 0.0	tr|M1CH20|M1CH20_SOLTU Uncharacterized protein OS=Solanum tuberosum GN=PGSC0003DMG400026172 PE=4 SV=1 7.5e-232	GO:0009507, chloroplast	-
TRINITY_DN70646_c0_g1	0.0001	23.4148093333	-17.8370617647	4.41417692187e-05	0.0180028352112	down	-	-	gi|823245293|ref|XP_012455317.1| PREDICTED: probable serine/threonine-protein phosphatase 2A regulatory subunit B'' subunit TON2 [Gossypium raimondii] 1.5e-19	gi|1009149904|ref|XM_016037242.1| PREDICTED: Ziziphus jujuba probable serine/threonine-protein phosphatase 2A regulatory subunit B'' subunit TON2 (LOC107426927), mRNA 9.26539e-24	-	sp|Q9FEE2|TON2_ARATH Probable serine/threonine-protein phosphatase 2A regulatory subunit B'' subunit TON2 OS=Arabidopsis thaliana GN=TON2 PE=1 SV=1 1.25421e-21	tr|A0A0D2VNY5|A0A0D2VNY5_GOSRA Uncharacterized protein OS=Gossypium raimondii GN=B456_011G187900 PE=4 SV=1 1.1e-19	GO:0000226, microtubule cytoskeleton organization;GO:0000913, preprophase band assembly;GO:0005509, calcium ion binding;GO:0005634, nucleus;GO:0005737, cytoplasm;GO:0005819, spindle;GO:0009524, phragmoplast;GO:0009826, unidimensional cell growth;GO:0030865, cortical cytoskeleton organization	-
TRINITY_DN71306_c1_g1	0.0001	8.586689999999999	-16.3898144875	6.01316842039e-05	0.0225003421447	down	-	KOG2171, KOG2171, KOG2171, Karyopherin (importin) beta 3 [Nuclear structure, Intracellular trafficking, secretion, and vesicular transport]. 4.06272e-45	gi|1021051548|gb|KZN09326.1| hypothetical protein DCAR_001982 [Daucus carota subsp. sativus] 3.4e-108	-	-	sp|Q8BKC5|IPO5_MOUSE Importin-5 OS=Mus musculus GN=Ipo5 PE=1 SV=3 2.60862e-34	tr|A0A067LDC1|A0A067LDC1_JATCU Uncharacterized protein OS=Jatropha curcas GN=JCGZ_01877 PE=4 SV=1 1.3e-99	GO:0000060, protein import into nucleus, translocation;GO:0005634, nucleus;GO:0005654, nucleoplasm;GO:0005737, cytoplasm;GO:0005794, Golgi apparatus;GO:0006607, NLS-bearing protein import into nucleus;GO:0006610, ribosomal protein import into nucleus;GO:0008139, nuclear localization sequence binding;GO:0008565, protein transporter activity;GO:0016020, membrane;GO:0031965, nuclear membrane;GO:0034…	-
TRINITY_DN70092_c1_g2	16.0659676667	0.208808033333	6.2656868511	4.1136729946999994e-05	0.017195659054900003	up	-	-	gi|1021053396|gb|KZN11174.1| hypothetical protein DCAR_003830 [Daucus carota subsp. sativus] 1.9e-15	-	-	-	-	-	-
TRINITY_DN89242_c1_g1	0.0001	5.27810366667	-15.6877320663	0.00012207017188400001	0.0356417158679	down	-	-	-	-	-	-	-	-	-
TRINITY_DN95884_c1_g2	0.0251628	26.3472562767	-10.0321445489	1.43608398155e-05	0.00832302447109	down	-	-	gi|641856314|gb|KDO75094.1| hypothetical protein CISIN_1g035581mg [Citrus sinensis] 1.9e-43	gi|731388856|ref|XM_002275157.3| PREDICTED: Vitis vinifera probable serine/threonine-protein phosphatase 2A regulatory subunit B'' subunit TON2 (LOC100247694), mRNA 1.54089e-56	-	sp|Q9FEE2|TON2_ARATH Probable serine/threonine-protein phosphatase 2A regulatory subunit B'' subunit TON2 OS=Arabidopsis thaliana GN=TON2 PE=1 SV=1 2.8827e-45	tr|V4U0V9|V4U0V9_9ROSI Uncharacterized protein OS=Citrus clementina GN=CICLE_v10005060mg PE=4 SV=1 1.4e-43	GO:0000226, microtubule cytoskeleton organization;GO:0000913, preprophase band assembly;GO:0005509, calcium ion binding;GO:0005634, nucleus;GO:0005737, cytoplasm;GO:0005819, spindle;GO:0009524, phragmoplast;GO:0009826, unidimensional cell growth;GO:0016021, integral component of membrane;GO:0030865, cortical cytoskeleton organization	-
TRINITY_DN69714_c0_g1	8.17484564377	0.0001	16.3189038697	9.62609626516e-05	0.030282064862599996	up	cd00204, ANK, ankyrin repeats; ankyrin repeats mediate protein-protein interactions in very diverse families of proteins. The number of ANK repeats in a protein can range from 2 to over 20 (ankyrins, for example). ANK repeats may occur in combinations with other types of domains. The structural repeat unit contains two antiparallel helices and a beta-hairpin, repeats are stacked in a superhelical…	KOG0195, KOG0195, KOG0195, Integrin-linked kinase [Signal transduction mechanisms]. 5.90269e-08	gi|1021046486|gb|KZN04266.1| hypothetical protein DCAR_005092 [Daucus carota subsp. sativus] 2.5e-31	-	pfam12796, Ank_2, Ankyrin repeats (3 copies). 1.01753e-07	sp|Q5B0V6|AKR1_EMENI Palmitoyltransferase akr1 OS=Emericella nidulans (strain FGSC A4 / ATCC 38163 / CBS 112.46 / NRRL 194 / M139) GN=akr1 PE=3 SV=2 3.27803e-06	tr|B9RTE9|B9RTE9_RICCO Ankyrin repeat-containing protein, putative OS=Ricinus communis GN=RCOM_0909020 PE=4 SV=1 5.1e-08	GO:0000139, Golgi membrane;GO:0008270, zinc ion binding;GO:0016021, integral component of membrane;GO:0019706, protein-cysteine S-palmitoyltransferase activity;GO:0031901, early endosome membrane	-
TRINITY_DN75371_c2_g1	5.646120666669999	0.0001	15.784972341400001	2.0690912423900002e-06	0.00196900853267	up	-	-	-	-	-	-	-	-	-
TRINITY_DN89355_c1_g1	138.460136667	0.0270064333333	12.323879937200001	1.0338549887e-09	5.31277401591e-06	up	-	-	gi|1021025777|gb|KZM83565.1| hypothetical protein DCAR_031134 [Daucus carota subsp. sativus] 2.0e-10	-	-	-	-	-	-
TRINITY_DN92095_c0_g1	0.07779036666669999	8.381053999999999	-6.7513963711	1.76152382892e-05	0.009629913459610001	down	pfam00190, Cupin_1, Cupin. This family represents the conserved barrel domain of the 'cupin' superfamily ('cupa' is the Latin term for a small barrel). This family contains 11S and 7S plant seed storage proteins, and germins. Plant seed storage proteins provide the major nitrogen source for the developing plant. 2.36271e-41	-	gi|802620496|ref|XP_012075590.1| PREDICTED: putative germin-like protein 2-1 [Jatropha curcas] 4.4e-73	gi|219817625|gb|FJ148689.1| Daucus carota subsp. sativus clone BAC C154H12 genomic sequence 2.38756e-102	pfam00190, Cupin_1, Cupin. This family represents the conserved barrel domain of the 'cupin' superfamily ('cupa' is the Latin term for a small barrel). This family contains 11S and 7S plant seed storage proteins, and germins. Plant seed storage proteins provide the major nitrogen source for the developing plant. 5.64472e-42	sp|Q6K5Q0|GL21_ORYSJ Putative germin-like protein 2-1 OS=Oryza sativa subsp. japonica GN=Os02g0491600 PE=3 SV=1 8.85949e-86	tr|A0A067KRJ7|A0A067KRJ7_JATCU Uncharacterized protein OS=Jatropha curcas GN=JCGZ_09203 PE=3 SV=1 3.3e-73	GO:0005576, extracellular region;GO:0005618, cell wall;GO:0030145, manganese ion binding;GO:0033609, oxalate metabolic process;GO:0045735, nutrient reservoir activity;GO:0046564, oxalate decarboxylase activity;GO:0048046, apoplast	-
TRINITY_DN73009_c1_g2	14.889406666700001	0.0001	17.183926739	2.4049168555599997e-07	0.00037831796134800004	up	-	-	-	-	-	-	-	-	-
TRINITY_DN92783_c0_g2	19.4711079667	0.0001	17.5709754547	1.28585023312e-13	9.91159076696e-09	up	COG2319, COG2319, FOG: WD40 repeat [General function prediction only]. 8.86178e-06	KOG0289, KOG0289, KOG0289, mRNA splicing factor [General function prediction only]. 2.05059e-16	gi|698575314|ref|XP_009775901.1| PREDICTED: pre-mRNA-processing factor 19 homolog 1-like [Nicotiana sylvestris] 5.9e-30	-	-	sp|Q9AV81|PRP19_ORYSJ Pre-mRNA-processing factor 19 OS=Oryza sativa subsp. japonica GN=PRP19 PE=2 SV=1 5.30816e-28	tr|A0A0V0IIF6|A0A0V0IIF6_SOLCH Putative U-box domain-containing protein 72-like OS=Solanum chacoense PE=4 SV=1 1.0e-29	GO:0004842, ubiquitin-protein transferase activity;GO:0005634, nucleus;GO:0005681, spliceosomal complex;GO:0006281, DNA repair;GO:0006397, mRNA processing;GO:0008380, RNA splicing;GO:0016567, protein ubiquitination;GO:0016874, ligase activity;GO:0045087, innate immune response;GO:0061630, ubiquitin protein ligase activity;GO:0070534, protein K63-linked ubiquitination	-
TRINITY_DN88530_c0_g2	4.02731653333	11.693334166700001	-1.53779557712	8.27925880635e-05	0.0275078373841	down	-	-	gi|1021036258|gb|KZM94041.1| hypothetical protein DCAR_017286 [Daucus carota subsp. sativus] 6.7e-20	-	-	-	tr|A0A061GT73|A0A061GT73_THECC Transferases,tRNA-methyltransferases OS=Theobroma cacao GN=TCM_040691 PE=4 SV=1 5.9e-08	GO:0008033, tRNA processing;GO:0008168, methyltransferase activity;GO:0016783, sulfurtransferase activity	-
TRINITY_DN95336_c2_g3	0.0001	15.1293483333	-17.2069903221	4.12702955963e-05	0.017195659054900003	down	-	-	gi|1021032333|gb|KZM90117.1| hypothetical protein DCAR_022518 [Daucus carota subsp. sativus] 3.5e-13	-	-	-	-	-	-
TRINITY_DN92975_c0_g1	0.319549066667	39.1295421667	-6.936076946339999	0.00016916603289800002	0.044352571931499996	down	PLN00053, PLN00053, photosystem II subunit R; Provisional. 2.80732e-12	-	gi|1021043098|gb|KZN00879.1| hypothetical protein DCAR_009633 [Daucus carota subsp. sativus] 1.7e-07	gi|566195488|ref|XM_006377795.1| Populus trichocarpa hypothetical protein (POPTR_0011s14540g) mRNA, complete cds 4.34022e-13	pfam04725, PsbR, Photosystem II 10 kDa polypeptide PsbR. This protein is associated with the oxygen-evolving complex of photosystem II. Its function in photosynthesis is not known. The C-terminal hydrophobic region functions as a thylakoid transfer signal but is not removed. 1.85254e-12	sp|Q40070|PSBR_HORVU Photosystem II 10 kDa polypeptide, chloroplastic OS=Hordeum vulgare GN=PSBR PE=3 SV=1 1.56781e-12	-	GO:0009535, chloroplast thylakoid membrane;GO:0009654, photosystem II oxygen evolving complex;GO:0015979, photosynthesis	K03541-ko00195 Photosynthesis
TRINITY_DN76442_c0_g1	0.048068	11.390903333299999	-7.888589668889999	2.39984776263e-06	0.00210414293881	down	-	-	-	-	-	-	-	-	-
TRINITY_DN74042_c1_g6	7.66885	0.038299	7.645559717699999	1.2368879319500001e-07	0.00022700427516699997	up	-	-	gi|1021041902|gb|KZM99683.1| hypothetical protein DCAR_012955 [Daucus carota subsp. sativus] 1.6e-23	-	-	-	tr|A0A061E2M3|A0A061E2M3_THECC TraB family protein isoform 2 OS=Theobroma cacao GN=TCM_007757 PE=4 SV=1 4.2e-19	-	-
TRINITY_DN79919_c3_g5	9.31583	0.0001	16.5073966923	6.18343982721e-08	0.00013618054536	up	-	-	-	-	-	-	-	-	-
TRINITY_DN77152_c0_g1	0.060105666666699996	12.848663737899999	-7.7399015991399995	6.98253606178e-08	0.000149507734643	down	-	-	-	-	-	-	-	-	-
TRINITY_DN71609_c0_g3	0.0001	7.630137700000001	-16.219421473	1.02974951731e-05	0.006401221959159999	down	-	-	gi|1021048016|gb|KZN05796.1| hypothetical protein DCAR_006633 [Daucus carota subsp. sativus] 2.1e-12	-	-	sp|Q8RVQ5|SEC10_ARATH Exocyst complex component SEC10 OS=Arabidopsis thaliana GN=SEC10 PE=1 SV=2 3.50544e-08	tr|A0A059BGY3|A0A059BGY3_EUCGR Uncharacterized protein OS=Eucalyptus grandis GN=EUGRSUZ_G02657 PE=4 SV=1 2.9e-09	GO:0000145, exocyst;GO:0004553, hydrolase activity, hydrolyzing O-glycosyl compounds;GO:0005886, plasma membrane;GO:0005975, carbohydrate metabolic process;GO:0006887, exocytosis;GO:0009506, plasmodesma;GO:0016020, membrane;GO:0048278, vesicle docking;GO:0060321, acceptance of pollen	-
TRINITY_DN92583_c0_g2	7.5262266666699995	0.0001	16.199639119100002	7.2017673073800005e-06	0.00474467203066	up	cd03009, TryX_like_TryX_NRX, Tryparedoxin (TryX)-like family, TryX and nucleoredoxin (NRX) subfamily; TryX and NRX are thioredoxin (TRX)-like protein disulfide oxidoreductases that alter the redox state of target proteins via the reversible oxidation of an active center CXXC motif. TryX is involved in the regulation of oxidative stress in parasitic trypanosomatids by reducing TryX peroxidase, whi…	-	gi|1021042081|gb|KZM99862.1| hypothetical protein DCAR_012776 [Daucus carota subsp. sativus] 3.1e-38	-	-	sp|O80763|NRX1_ARATH Probable nucleoredoxin 1 OS=Arabidopsis thaliana GN=At1g60420 PE=1 SV=1 8.03106e-12	tr|Q5DMW8|Q5DMW8_CUCME Protein disulfide isomerase (PDI)-like protein 4 OS=Cucumis melo GN=PDI4 PE=4 SV=1 8.3e-12	GO:0005829, cytosol;GO:0009860, pollen tube growth;GO:0010183, pollen tube guidance;GO:0016853, isomerase activity;GO:0045454, cell redox homeostasis;GO:0046686, response to cadmium ion;GO:0047134, protein-disulfide reductase activity;GO:0080092, regulation of pollen tube growth	-
TRINITY_DN73009_c2_g3	5.18676666667	0.0001	15.662547849200001	8.56403222094e-05	0.0280907545385	up	-	-	-	-	-	-	-	-	-
TRINITY_DN92936_c1_g5	9.00403333333	0.0001	16.4582837773	0.00019271930310599996	0.047925551476099996	up	-	-	-	-	-	-	-	-	-
TRINITY_DN91100_c0_g2	0.0001	14.374689499999999	-17.1331712679	2.19499803207e-05	0.011204956179299999	down	TIGR01628, Polyadenylate-binding_protein_3, polyadenylate binding protein, human types 1, 2, 3, 4 family. These eukaryotic proteins recognize the poly-A of mRNA and consists of four tandem RNA recognition domains at the N-terminus (rrm: pfam00076) followed by a PABP-specific domain (pfam00658) at the C-terminus. The protein is involved in the transport of mRNA's from the nucleus to the cytoplasm.…	KOG0123, KOG0123, KOG0123, Polyadenylate-binding protein (RRM superfamily) [RNA processing and modification, Translation, ribosomal structure and biogenesis]. 1.43852e-06	gi|1021021759|gb|KZM80302.1| hypothetical protein DCAR_031910 [Daucus carota subsp. sativus] 1.9e-13	-	-	sp|Q9FXA2|PABP8_ARATH Polyadenylate-binding protein 8 OS=Arabidopsis thaliana GN=PAB8 PE=1 SV=1 8.97341e-10	tr|A0A061DZV7|A0A061DZV7_THECC Polyadenylate-binding protein OS=Theobroma cacao GN=TCM_007096 PE=3 SV=1 4.9e-09	GO:0000166, nucleotide binding;GO:0003723, RNA binding;GO:0005634, nucleus;GO:0005829, cytosol;GO:0006417, regulation of translation;GO:0016032, viral process;GO:0046686, response to cadmium ion	-
TRINITY_DN71826_c1_g1	5.92148566667	0.054696333333300005	6.758371252309999	2.05628539964e-05	0.0107096345389	up	-	-	-	-	-	-	-	-	-
TRINITY_DN88209_c2_g1	6.505616666669999	17.5948588333	-1.4353962177000001	2.57531799986e-05	0.0126439912144	down	-	-	gi|1021047722|gb|KZN05502.1| hypothetical protein DCAR_006339 [Daucus carota subsp. sativus] 7.7e-09	-	-	-	tr|I1HZW6|I1HZW6_BRADI Uncharacterized protein OS=Brachypodium distachyon GN=BRADI3G11327 PE=4 SV=1 7.9e-06	-	-
TRINITY_DN77715_c1_g1	0.153395	8.460666999999999	-5.78544804003	1.638302019e-10	1.26283596229e-06	down	-	-	-	-	-	-	-	-	-
TRINITY_DN198209_c0_g1	0.0001	7.8814	-16.2661643028	0.00017327492095700004	0.04516580489159999	down	-	-	-	-	-	-	-	-	-
TRINITY_DN80940_c0_g4	0.0001	23.353483999999998	-17.8332782695	4.29824481593e-09	1.51856158105e-05	down	-	-	gi|1021048854|gb|KZN06634.1| hypothetical protein DCAR_007471 [Daucus carota subsp. sativus] 2.8e-15	gi|703117381|ref|XM_010103063.1| Morus notabilis 60S ribosomal protein L5 partial mRNA 2.34124e-17	-	sp|Q6UNT2|RL5_CUCSA 60S ribosomal protein L5 OS=Cucumis sativus GN=RPL5 PE=2 SV=1 5.02147e-12	tr|I3S764|I3S764_LOTJA Uncharacterized protein OS=Lotus japonicus PE=2 SV=1 1.4e-11	GO:0003735, structural constituent of ribosome;GO:0005840, ribosome;GO:0006412, translation;GO:0008097, 5S rRNA binding	-
TRINITY_DN82169_c2_g1	5.07573756667	0.7311479999999999	2.7953821055400003	5.9101969457e-05	0.0222229171204	up	PLN02639, PLN02639, oxidoreductase, 2OG-Fe(II) oxygenase family protein. 0.0	KOG0143, KOG0143, KOG0143, Iron/ascorbate family oxidoreductases [Secondary metabolites biosynthesis, transport and catabolism, General function prediction only]. 1.72406e-90	gi|1021044037|gb|KZN01818.1| hypothetical protein DCAR_010572 [Daucus carota subsp. sativus] 1.5e-150	gi|1026036109|ref|XM_016708728.1| PREDICTED: Capsicum annuum protein DOWNY MILDEW RESISTANCE 6 (LOC107862992), mRNA 2.02172e-101	pfam03171, 2OG-FeII_Oxy, 2OG-Fe(II) oxygenase superfamily. This family contains members of the 2-oxoglutarate (2OG) and Fe(II)-dependent oxygenase superfamily. This family includes the C-terminal of prolyl 4-hydroxylase alpha subunit. The holoenzyme has the activity EC:1.14.11.2 catalysing the reaction: Procollagen L-proline + 2-oxoglutarate + O2 <=; procollagen trans- 4-hydroxy-L-proline + succi…	sp|Q9FLV0|DMR6_ARATH Protein DOWNY MILDEW RESISTANCE 6 OS=Arabidopsis thaliana GN=DMR6 PE=1 SV=1 1.08478e-173	tr|A0A068UBG5|A0A068UBG5_COFCA Uncharacterized protein OS=Coffea canephora GN=GSCOC_T00019871001 PE=3 SV=1 3.8e-149	GO:0002229, defense response to oomycetes;GO:0002239, response to oomycetes;GO:0009617, response to bacterium;GO:0009620, response to fungus;GO:0009751, response to salicylic acid;GO:0009813, flavonoid biosynthetic process;GO:0016491, oxidoreductase activity;GO:0033759, flavone synthase activity;GO:0042742, defense response to bacterium;GO:0046244, salicylic acid catabolic process;GO:0046872, met…	-
TRINITY_DN86967_c0_g4	9.70246533333	1.4416799999999999	2.7506003985	0.000110636212889	0.0333844822598	up	-	-	gi|1021023721|gb|KZM81509.1| hypothetical protein DCAR_029122 [Daucus carota subsp. sativus] 1.6e-11	-	-	-	-	-	-
TRINITY_DN92756_c0_g1	7.961647333330001	0.32813266666700003	4.6007158366	8.06655831667e-05	0.0272713354459	up	-	-	-	-	-	-	-	-	-
TRINITY_DN85029_c0_g2	0.019198266666700003	9.309402	-8.921568625619999	9.750026576069999e-07	0.0011929389659300002	down	-	-	gi|1021031563|gb|KZM89348.1| hypothetical protein DCAR_026423 [Daucus carota subsp. sativus] 4.4e-09	-	-	sp|Q8L748|NU107_ARATH Nuclear pore complex protein NUP107 OS=Arabidopsis thaliana GN=NUP107 PE=1 SV=1 2.49834e-06	tr|F6HXR0|F6HXR0_VITVI Putative uncharacterized protein OS=Vitis vinifera GN=VIT_09s0002g00840 PE=4 SV=1 6.4e-08	GO:0000973, posttranscriptional tethering of RNA polymerase II gene DNA at nuclear periphery;GO:0005635, nuclear envelope;GO:0006355, regulation of transcription, DNA-templated;GO:0006406, mRNA export from nucleus;GO:0006606, protein import into nucleus;GO:0017056, structural constituent of nuclear pore;GO:0031080, nuclear pore outer ring	-
TRINITY_DN99009_c4_g2	7.690930666669999	0.0332861	7.8520945311000006	7.496330932159999e-07	0.0009319873885689999	up	-	-	-	-	-	-	-	-	-
TRINITY_DN80146_c0_g1	0.190986	12.971171	-6.0856980305	0.000187229569203	0.0470098685776	down	-	-	-	-	-	-	-	-	-
TRINITY_DN82828_c0_g1	0.0104787	5.27830193351	-8.97647032345	3.29702035807e-07	0.0004983155357669999	down	-	-	-	-	-	-	-	-	-
TRINITY_DN96004_c0_g1	0.0709071666667	5.99414933333	-6.4014797665600005	5.324673139540001e-13	1.3681215164700002e-08	down	-	-	-	-	-	-	-	-	-
TRINITY_DN72178_c2_g1	38.444415	8.45678	2.1845936733	6.52334494451e-05	0.0234968446268	up	-	-	-	-	-	-	-	-	-
TRINITY_DN88232_c3_g3	15.422533333299999	0.0001	17.2346802389	0.000196920198319	0.0486506497656	up	-	-	-	-	-	-	-	-	-
TRINITY_DN86306_c0_g1	15.5983096667	0.0001	17.251030172300002	0.000121768450838	0.0356417158679	up	-	-	-	-	-	-	-	-	-
TRINITY_DN85957_c0_g1	0.0001	18.6274773333	-17.5070727818	0.000191085436835	0.047822232604300005	down	pfam14372, DUF4413, Domain of unknown function (DUF4413). This domain is part of an RNase-H fold section of longer proteins some of which are transposable elements possibly of the Pong type, since some members are putative Tam3 transposases. 4.50259e-27	KOG1121, KOG1121, KOG1121, Tam3-transposase (Ac family) [Replication, recombination and repair]. 6.63334e-115	gi|720000613|ref|XP_010256082.1| PREDICTED: zinc finger BED domain-containing protein RICESLEEPER 2-like isoform X2 [Nelumbo nucifera] 5.8e-138	-	pfam14372, DUF4413, Domain of unknown function (DUF4413). This domain is part of an RNase-H fold section of longer proteins some of which are transposable elements possibly of the Pong type, since some members are putative Tam3 transposases. 1.07571e-27	sp|Q6AVI0|RSLE2_ORYSJ Zinc finger BED domain-containing protein RICESLEEPER 2 OS=Oryza sativa subsp. japonica GN=Os03g0733400 PE=2 SV=1 1.28624e-106	tr|U5D9E5|U5D9E5_AMBTC Uncharacterized protein OS=Amborella trichopoda GN=AMTR_s00067p00136180 PE=4 SV=1 1.5e-117	GO:0000977, RNA polymerase II regulatory region sequence-specific DNA binding;GO:0003677, DNA binding;GO:0003700, DNA binding transcription factor activity;GO:0005634, nucleus;GO:0006351, transcription, DNA-templated;GO:0006357, regulation of transcription by RNA polymerase II;GO:0009791, post-embryonic development;GO:0046872, metal ion binding	-
TRINITY_DN76377_c1_g1	75.353009	8.884446	3.0843113994999998	3.61377318121e-05	0.0156668724692	up	-	-	-	-	-	-	-	-	-
TRINITY_DN94488_c1_g1	0.26788333333299996	5.011684	-4.2256187216	4.60911021655e-06	0.00325944434599	down	-	-	gi|1021037706|gb|KZM95489.1| hypothetical protein DCAR_018731 [Daucus carota subsp. sativus] 9.2e-29	-	-	-	-	-	-
TRINITY_DN78301_c0_g6	6.183026666669999	0.172168333333	5.1664215083	9.92043655053e-05	0.0305874836075	up	cd03009, TryX_like_TryX_NRX, Tryparedoxin (TryX)-like family, TryX and nucleoredoxin (NRX) subfamily; TryX and NRX are thioredoxin (TRX)-like protein disulfide oxidoreductases that alter the redox state of target proteins via the reversible oxidation of an active center CXXC motif. TryX is involved in the regulation of oxidative stress in parasitic trypanosomatids by reducing TryX peroxidase, whi…	-	gi|1021042081|gb|KZM99862.1| hypothetical protein DCAR_012776 [Daucus carota subsp. sativus] 9.3e-38	-	-	sp|Q7XPE8|NRX3_ORYSJ Probable nucleoredoxin 3 OS=Oryza sativa subsp. japonica GN=Os04g0608600 PE=3 SV=2 5.36445e-07	tr|M1D253|M1D253_SOLTU Uncharacterized protein OS=Solanum tuberosum GN=PGSC0003DMG400031000 PE=4 SV=1 5.3e-09	GO:0005829, cytosol;GO:0009860, pollen tube growth;GO:0010183, pollen tube guidance;GO:0045454, cell redox homeostasis;GO:0047134, protein-disulfide reductase activity;GO:0080092, regulation of pollen tube growth	-
TRINITY_DN83720_c1_g5	11.96445	0.0001	16.868394552799998	2.13762115669e-09	9.15400633334e-06	up	-	-	-	-	-	-	-	-	-
TRINITY_DN81366_c1_g1	0.0001	7.657610000000001	-16.2246065655	3.9243281758699995e-06	0.00298311915322	down	-	-	-	-	-	-	-	-	-
TRINITY_DN73958_c2_g1	17.3049403333	0.0001	17.4008244416	4.52643762588e-05	0.018200914708599997	up	-	-	-	-	-	-	-	-	-
TRINITY_DN73767_c0_g1	0.0001	9.750993333330001	-16.5732615732	2.8660751356599997e-11	4.3144200999899996e-07	down	-	-	-	-	-	-	-	-	-
TRINITY_DN78598_c1_g3	0.0001	12.267160833299998	-16.9044418583	5.21736889425e-07	0.0007312095074670001	down	-	-	gi|1021047649|gb|KZN05429.1| hypothetical protein DCAR_006266 [Daucus carota subsp. sativus] 6.3e-30	-	-	-	tr|A0A061GJL1|A0A061GJL1_THECC Nucleic acid binding protein, putative isoform 1 OS=Theobroma cacao GN=TCM_036919 PE=4 SV=1 7.1e-26	GO:0005829, cytosol;GO:0009507, chloroplast	-
TRINITY_DN87285_c0_g1	15.939307999999999	2.362054	2.7544751442	9.58757134715e-05	0.030282064862599996	up	-	-	-	-	-	-	-	-	-
TRINITY_DN86571_c0_g2	0.47703260000000003	7.897455766669999	-4.04922818426	7.007071078130001e-06	0.0046589352644	down	-	-	-	-	-	-	-	-	-
TRINITY_DN86571_c0_g4	0.0001	7.62922	-16.2192479452	1.2934628693700002e-06	0.00140426344925	down	-	-	-	-	-	-	-	-	-
TRINITY_DN97020_c2_g1	7.239263666669999	0.0001	16.1435553423	1.44711237859e-05	0.00832357512747	up	PLN00188, PLN00188, enhanced disease resistance protein (EDR2); Provisional. 9.30584e-16	-	gi|1021040571|gb|KZM98352.1| hypothetical protein DCAR_014286 [Daucus carota subsp. sativus] 2.5e-09	-	-	sp|Q39008|M3K1_ARATH Mitogen-activated protein kinase kinase kinase 1 OS=Arabidopsis thaliana GN=MEKK1 PE=1 SV=2 5.6057e-06	tr|A0A0A0QVW1|A0A0A0QVW1_9ASTR Mitogen-activated protein kinase kinase kinase 1, plant (Fragment) OS=Chrysanthemum boreale PE=2 SV=1 1.1e-07	GO:0000165, MAPK cascade;GO:0003677, DNA binding;GO:0004674, protein serine/threonine kinase activity;GO:0004709, MAP kinase kinase kinase activity;GO:0005524, ATP binding;GO:0005634, nucleus;GO:0005768, endosome;GO:0005886, plasma membrane;GO:0006970, response to osmotic stress;GO:0009409, response to cold;GO:0009611, response to wounding;GO:0009631, cold acclimation;GO:0009651, response to salt…	-
TRINITY_DN92289_c0_g3	1.21424710627	27.402440076399998	-4.4961704117400005	4.19746686615e-07	0.0005991650758819999	down	-	-	gi|1021029915|gb|KZM87700.1| hypothetical protein DCAR_024801 [Daucus carota subsp. sativus] 1.2e-101	-	-	-	tr|A0A0J8C6K5|A0A0J8C6K5_BETVU Uncharacterized protein OS=Beta vulgaris subsp. vulgaris GN=BVRB_6g147960 PE=4 SV=1 3.2e-22	-	-
TRINITY_DN79131_c0_g2	35.7131906667	0.325154333333	6.77918857115	1.9572949341700002e-07	0.000321004698119	up	-	-	-	-	-	-	-	-	-
TRINITY_DN82571_c1_g1	0.0001	5.050345	-15.624094324400001	1.64543361898e-05	0.009124698864639999	down	pfam05699, Dimer_Tnp_hAT, hAT family C-terminal dimerization region. This dimerization region is found at the C terminus of the transposases of elements belonging to the Activator superfamily (hAT element superfamily). The isolated dimerization region forms extremely stable dimers in vitro. 1.36432e-14	KOG1121, KOG1121, KOG1121, Tam3-transposase (Ac family) [Replication, recombination and repair]. 5.00837e-17	gi|595851112|ref|XP_007210049.1| hypothetical protein PRUPE_ppa017735mg, partial [Prunus persica] 1.1e-16	-	pfam05699, Dimer_Tnp_hAT, hAT family C-terminal dimerization region. This dimerization region is found at the C terminus of the transposases of elements belonging to the Activator superfamily (hAT element superfamily). The isolated dimerization region forms extremely stable dimers in vitro. 3.25947e-15	sp|P03010|TRAC9_MAIZE Putative AC9 transposase OS=Zea mays PE=4 SV=1 1.06297e-16	tr|M5WPM0|M5WPM0_PRUPE Uncharacterized protein (Fragment) OS=Prunus persica GN=PRUPE_ppa017735mg PE=4 SV=1 8.6e-17	GO:0003677, DNA binding;GO:0006310, DNA recombination;GO:0032196, transposition	-
TRINITY_DN86585_c2_g3	11.1405	0.0001	16.7654544586	8.47955265088e-08	0.00016919327935000002	up	-	-	-	-	-	-	-	-	-
TRINITY_DN78487_c1_g1	0.154605333333	9.787614999999999	-5.98429536044	3.72439852763e-05	0.016038217168	down	-	-	-	-	-	-	-	-	-
TRINITY_DN95798_c3_g2	17.5951313333	0.0001	17.4248167571	2.05462743711e-07	0.000329947483556	up	-	-	-	-	-	-	-	-	-
TRINITY_DN79896_c1_g2	21.2971019969	0.0001	17.700297603499997	3.50578902795e-05	0.015441898848700002	up	-	-	-	-	-	-	-	-	-
TRINITY_DN78320_c1_g1	0.06643539999999999	5.36063033333	-6.33430665643	2.66764591418e-05	0.0128333068891	down	PLN00015, PLN00015, protochlorophyllide reductase. 2.37326e-130	KOG1208, KOG1208, KOG1208, Dehydrogenases with different specificities (related to short-chain alcohol dehydrogenases) [Secondary metabolites biosynthesis, transport and catabolism]. 1.45266e-24	gi|10720233|sp|Q9SDT1.1|POR_DAUCA RecName: Full=Protochlorophyllide reductase, chloroplastic; Short=PCR; AltName: Full=NADPH-protochlorophyllide oxidoreductase; Short=POR; Flags: Precursor 1.7e-146	gi|6644197|gb|AF207691.1|AF207691 Daucus carota cultivar Kurodagosun NADPH:protochlorophyllide oxidoreductase (POR1) mRNA, complete cds 0.0	-	sp|Q9SDT1|POR_DAUCA Protochlorophyllide reductase, chloroplastic OS=Daucus carota GN=POR1 PE=2 SV=1 0.0	tr|A0A0A0KZN7|A0A0A0KZN7_CUCSA Protochlorophyllide reductase, chloroplastic OS=Cucumis sativus GN=Csa_4G638340 PE=4 SV=1 6.7e-127	GO:0009507, chloroplast;GO:0015979, photosynthesis;GO:0015995, chlorophyll biosynthetic process;GO:0016630, protochlorophyllide reductase activity	K00218-ko00860 Porphyrin and chlorophyll metabolism
TRINITY_DN74208_c3_g1	20.34519	0.0001	17.634328228	2.46598190855e-06	0.0021357619941	up	-	-	-	-	-	-	-	-	-
TRINITY_DN95833_c1_g1	40.0577163667	0.010143433333299999	11.947318405999999	6.90617516078e-07	0.000872691465152	up	-	-	-	-	-	-	-	-	-
TRINITY_DN70737_c1_g1	0.0001	5.57874333333	-15.767652557	2.34669025557e-06	0.00210414293881	down	-	-	-	-	-	-	-	-	-
TRINITY_DN90085_c2_g2	14.443837	0.0160244333333	9.81596498901	1.23498892414e-10	1.0577268472299999e-06	up	cd03009, TryX_like_TryX_NRX, Tryparedoxin (TryX)-like family, TryX and nucleoredoxin (NRX) subfamily; TryX and NRX are thioredoxin (TRX)-like protein disulfide oxidoreductases that alter the redox state of target proteins via the reversible oxidation of an active center CXXC motif. TryX is involved in the regulation of oxidative stress in parasitic trypanosomatids by reducing TryX peroxidase, whi…	-	gi|1021036757|gb|KZM94540.1| hypothetical protein DCAR_017783 [Daucus carota subsp. sativus] 1.3e-57	-	-	sp|O80763|NRX1_ARATH Probable nucleoredoxin 1 OS=Arabidopsis thaliana GN=At1g60420 PE=1 SV=1 1.88328e-12	tr|F6HHU9|F6HHU9_VITVI Putative uncharacterized protein OS=Vitis vinifera GN=VIT_01s0127g00560 PE=4 SV=1 2.8e-15	GO:0005623, cell;GO:0005829, cytosol;GO:0009860, pollen tube growth;GO:0010183, pollen tube guidance;GO:0045454, cell redox homeostasis;GO:0046686, response to cadmium ion;GO:0047134, protein-disulfide reductase activity;GO:0080092, regulation of pollen tube growth	-
TRINITY_DN97085_c1_g1	6.47559291372	0.0284691666667	7.829468219710001	7.468051197639999e-06	0.004878409512010001	up	-	KOG1874, KOG1874, KOG1874, KEKE-like motif-containing transcription regulator (Rlr1)/suppressor of sin4 [Transcription]. 3.69138e-10	gi|1009166085|ref|XP_015901397.1| PREDICTED: LOW QUALITY PROTEIN: THO complex subunit 2 [Ziziphus jujuba] 1.5e-18	gi|694392720|ref|XR_669353.1| PREDICTED: Pyrus x bretschneideri THO complex subunit 2 (LOC103961040), transcript variant X2, misc_RNA 6.47774e-31	pfam11732, Thoc2, Transcription- and export-related complex subunit. The THO/TREX complex is the transcription- and export-related complex associated with spliceosomes that preferentially deal with spliced mRNAs as opposed to unspliced mRNAs. Thoc2 plays a role in RNA polymerase II (RNA pol II)-dependent transcription and is required for the stability of DNA repeats. In humans, the TRE complex is…	sp|F4IAT2|THOC2_ARATH THO complex subunit 2 OS=Arabidopsis thaliana GN=THO2 PE=1 SV=1 4.70699e-22	tr|V4UB31|V4UB31_9ROSI Uncharacterized protein (Fragment) OS=Citrus clementina GN=CICLE_v10017843mg PE=4 SV=1 1.1e-18	GO:0000347, THO complex;GO:0003723, RNA binding;GO:0006397, mRNA processing;GO:0008380, RNA splicing;GO:0051028, mRNA transport	-
TRINITY_DN75253_c0_g1	0.0001	10.2841626667	-16.6500648093	8.42272440749e-05	0.0277453180675	down	-	-	-	gi|219817343|gb|FJ148407.1| Daucus carota subsp. sativus clone BAC C055M15 genomic sequence 8.84624e-24	-	-	-	-	-
TRINITY_DN85363_c0_g2	0.0001	11.890203333299999	-16.8594138611	3.3159184871e-05	0.015214144572799999	down	-	-	-	-	-	-	-	-	-
TRINITY_DN84704_c0_g4	0.0001	11.6897356667	-16.8348827818	1.51330397565e-05	0.008577095371430001	down	-	-	gi|1021032739|gb|KZM90523.1| hypothetical protein DCAR_022112 [Daucus carota subsp. sativus] 3.6e-82	-	-	sp|O80763|NRX1_ARATH Probable nucleoredoxin 1 OS=Arabidopsis thaliana GN=At1g60420 PE=1 SV=1 1.88761e-33	-	GO:0005829, cytosol;GO:0009860, pollen tube growth;GO:0010183, pollen tube guidance;GO:0045454, cell redox homeostasis;GO:0046686, response to cadmium ion;GO:0047134, protein-disulfide reductase activity;GO:0080092, regulation of pollen tube growth	-
TRINITY_DN75564_c0_g1	12.68286959	1.53841186667	3.04336750119	0.000112951542442	0.0338775517297	up	-	-	gi|1021027782|gb|KZM85569.1| hypothetical protein DCAR_027009 [Daucus carota subsp. sativus] 3.8e-28	gi|703091296|ref|XM_010096009.1| Morus notabilis hypothetical protein partial mRNA 1.22292e-30	-	sp|Q0WMZ5|OP162_ARATH Outer envelope pore protein 16-2, chloroplastic OS=Arabidopsis thaliana GN=OEP162 PE=2 SV=1 1.41003e-16	tr|A0A124SBC3|A0A124SBC3_CYNCS Mitochondrial inner membrane translocase subunit Tim17/Tim22/Tim23/peroxisomal protein PMP24 OS=Cynara cardunculus var. scolymus GN=Ccrd_007768 PE=4 SV=1 9.1e-22	GO:0005744, mitochondrial inner membrane presequence translocase complex;GO:0009527, plastid outer membrane;GO:0015171, amino acid transmembrane transporter activity;GO:0015288, porin activity;GO:0016021, integral component of membrane;GO:0030150, protein import into mitochondrial matrix;GO:0031305, integral component of mitochondrial inner membrane;GO:0031359, integral component of chloroplast o…	-
TRINITY_DN83542_c2_g2	15.52616	0.161261666667	6.58915371197	3.78775585559e-06	0.00294916966526	up	smart00205, THN, Thaumatin family. The thaumatin family gathers proteins related to plant pathogenesis. The thaumatin family includes very basic members with extracellular and vacuolar localization. Thaumatin itsel is a potent sweet-tasting protein. Several members of this family display significant in vitro activity of inhibiting hyphal growth or spore germination of various fungi probably by a …	-	gi|441482376|gb|AGC39179.1| thaumatin-like protein [Actinidia deliciosa] 1.7e-17	-	pfam00314, Thaumatin, Thaumatin family. 3.32047e-12	sp|P33679|ZEAM_MAIZE Zeamatin OS=Zea mays GN=Zlp PE=1 SV=2 1.39447e-15	tr|L7TYA3|L7TYA3_ACTDE Thaumatin-like protein OS=Actinidia deliciosa GN=TLP3 PE=2 SV=1 1.3e-17	GO:0031640, killing of cells of other organism;GO:0050832, defense response to fungus	-
TRINITY_DN75837_c1_g6	0.0001	8.224696666669999	-16.3276748516	9.50519395135e-05	0.0302760066181	down	-	-	gi|1021037706|gb|KZM95489.1| hypothetical protein DCAR_018731 [Daucus carota subsp. sativus] 2.0e-08	-	-	-	-	-	-
TRINITY_DN75837_c1_g8	9.33555633333	0.048861333333300005	7.5778989566799995	9.35793984833e-05	0.0299306522568	up	-	-	gi|1021037706|gb|KZM95489.1| hypothetical protein DCAR_018731 [Daucus carota subsp. sativus] 2.6e-27	-	-	-	-	-	-
TRINITY_DN77960_c0_g1	0.562370666667	7.17270333333	-3.67292371109	0.00020456661561400004	0.049122753472699995	down	-	-	-	-	-	-	-	-	-
TRINITY_DN77240_c0_g1	5.5373171999999995	1.1150558333299998	2.31207121675	0.000174703945197	0.04534185018069999	up	-	-	gi|1021050666|gb|KZN08444.1| hypothetical protein DCAR_000990 [Daucus carota subsp. sativus] 8.8e-07	-	-	-	-	-	-
TRINITY_DN89033_c0_g1	3.14427666667	23.5229556667	-2.9032692748000004	1.21083898816e-05	0.00722749072596	down	-	-	-	-	-	-	-	-	-
TRINITY_DN73747_c1_g2	0.028053700000000004	24.179806133299998	-9.75139590188	0.00016444595254600002	0.04339536153490001	down	-	-	gi|1021035690|gb|KZM93473.1| hypothetical protein DCAR_016718 [Daucus carota subsp. sativus] 9.0e-06	gi|219817608|gb|FJ148672.1| Daucus carota subsp. sativus clone BAC C003J12 genomic sequence 5.0947e-35	-	-	-	-	-
TRINITY_DN96558_c1_g3	0.0001	5.10388133333	-15.639307165999998	1.93451617346e-05	0.0103553038669	down	-	KOG2423, KOG2423, KOG2423, Nucleolar GTPase [General function prediction only]. 2.95095e-11	gi|1021041767|gb|KZM99548.1| hypothetical protein DCAR_013090 [Daucus carota subsp. sativus] 6.1e-18	gi|848854261|ref|XM_012992052.1| PREDICTED: Erythranthe guttatus nuclear/nucleolar GTPase 2 (LOC105967454), mRNA 3.965e-25	-	sp|A2XGQ1|NUG2_ORYSI Nuclear/nucleolar GTPase 2 OS=Oryza sativa subsp. indica GN=NUG2 PE=3 SV=1 8.13312e-15	tr|I1M3A3|I1M3A3_SOYBN Uncharacterized protein OS=Glycine max GN=GLYMA_13G278500 PE=4 SV=1 3.1e-14	GO:0003924, GTPase activity;GO:0005525, GTP binding;GO:0005730, nucleolus;GO:0008152, metabolic process;GO:0042254, ribosome biogenesis	-
TRINITY_DN89799_c1_g5	0.0860808333333	11.749806333299999	-7.09272921793	2.71377107875e-05	0.0128333068891	down	-	-	-	-	-	-	-	-	-
TRINITY_DN84085_c1_g2	43.3207666667	0.7158866666670001	5.919183755090001	0.000155928663495	0.041959983866699996	up	-	KOG0211, KOG0211, KOG0211, Protein phosphatase 2A regulatory subunit A and related proteins [Signal transduction mechanisms]. 6.59542e-13	gi|848891677|ref|XP_012845943.1| PREDICTED: serine/threonine-protein phosphatase 2A 65 kDa regulatory subunit A beta isoform-like [Erythranthe guttata] 2.5e-30	-	-	sp|Q38950|2AAB_ARATH Serine/threonine-protein phosphatase 2A 65 kDa regulatory subunit A beta isoform OS=Arabidopsis thaliana GN=PP2AA2 PE=1 SV=2 3.44115e-38	tr|A0A022QRS4|A0A022QRS4_ERYGU Uncharacterized protein OS=Erythranthe guttata GN=MIMGU_mgv1a005777mg PE=4 SV=1 1.9e-30	GO:0005829, cytosol;GO:0005886, plasma membrane;GO:0042325, regulation of phosphorylation;GO:0046686, response to cadmium ion	-
TRINITY_DN78711_c0_g1	0.0314354666667	5.3544227	-7.412194045080001	3.4870604363800004e-08	8.67063201796e-05	down	pfam14299, PP2, Phloem protein 2. Phloem protein 2 (PP2) is one of the most abundant and enigmatic proteins in the phloem sap. PP2 is translocated in the assimilate stream where its lectin activity or RNA-binding properties can exert effects over long distances. 2.66694e-12	-	gi|1021046895|gb|KZN04675.1| hypothetical protein DCAR_005512 [Daucus carota subsp. sativus] 4.6e-15	-	pfam14299, PP2, Phloem protein 2. Phloem protein 2 (PP2) is one of the most abundant and enigmatic proteins in the phloem sap. PP2 is translocated in the assimilate stream where its lectin activity or RNA-binding properties can exert effects over long distances. 5.3949e-13	sp|Q3E6P4|FB95_ARATH F-box protein At2g02240 OS=Arabidopsis thaliana GN=At2g02240 PE=2 SV=1 8.07853e-14	tr|K4D0R9|K4D0R9_SOLLC Uncharacterized protein OS=Solanum lycopersicum PE=4 SV=1 6.0e-15	GO:0009793, embryo development ending in seed dormancy	-
TRINITY_DN99040_c6_g2	1.16218166667	84.2269056667	-6.1793736586	1.37160144959e-05	0.008009529010390001	down	-	-	-	-	-	-	-	-	-
TRINITY_DN97254_c1_g1	62.441559660299994	1.90771523333	5.032588833369999	1.06731865718e-06	0.0012657085651199998	up	pfam03083, MtN3_slv, Sugar efflux transporter for intercellular exchange. This family includes proteins such as drosophila saliva, MtN3 involved in root nodule development and a protein involved in activation and expression of recombination activation genes (RAGs). Although the molecular function of these proteins is unknown, they are almost certainly transmembrane proteins. This family contains …	KOG1623, KOG1623, KOG1623, Multitransmembrane protein [General function prediction only]. 8.62091e-15	gi|473865477|gb|EMS47629.1| Bidirectional sugar transporter SWEET6b [Triticum urartu] 1.5e-25	-	pfam03083, MtN3_slv, Sugar efflux transporter for intercellular exchange. This family includes proteins such as drosophila saliva, MtN3 involved in root nodule development and a protein involved in activation and expression of recombination activation genes (RAGs). Although the molecular function of these proteins is unknown, they are almost certainly transmembrane proteins. This family contains …	sp|Q0J349|SWT7B_ORYSJ Bidirectional sugar transporter SWEET7b OS=Oryza sativa subsp. japonica GN=SWEET7B PE=3 SV=2 9.59461e-30	tr|M7ZHQ6|M7ZHQ6_TRIUA Bidirectional sugar transporter SWEET6b OS=Triticum urartu GN=TRIUR3_33918 PE=3 SV=1 1.1e-25	GO:0005887, integral component of plasma membrane;GO:0008643, carbohydrate transport;GO:0016021, integral component of membrane;GO:0051119, sugar transmembrane transporter activity	-
TRINITY_DN96409_c2_g1	0.0001	6.81266	-16.0559305874	3.81982591297e-11	4.3144200999899996e-07	down	-	-	gi|1021022569|gb|KZM80506.1| hypothetical protein DCAR_001218 [Daucus carota subsp. sativus] 8.7e-34	-	-	-	-	-	-
TRINITY_DN92516_c1_g1	9.875132	0.31690366666700004	4.96168377535	6.11762426028e-05	0.022565249461599997	up	-	-	-	-	-	-	-	-	-
TRINITY_DN97585_c0_g1	0.0001	11.867856666700002	-16.8566998824	0.00012531549086399998	0.036178159800699994	down	-	-	gi|1021041283|gb|KZM99064.1| hypothetical protein DCAR_013574 [Daucus carota subsp. sativus] 1.3e-07	gi|985432667|ref|XM_006467125.2| PREDICTED: Citrus sinensis serine/threonine-protein kinase Nek6 (LOC102613697), transcript variant X2, mRNA 1.73887e-15	-	sp|Q6YY75|NEK6_ORYSJ Serine/threonine-protein kinase Nek6 OS=Oryza sativa subsp. japonica GN=NEK6 PE=3 SV=2 2.68442e-07	tr|F6HL56|F6HL56_VITVI Putative uncharacterized protein OS=Vitis vinifera GN=VIT_08s0007g07970 PE=3 SV=1 3.2e-06	GO:0004674, protein serine/threonine kinase activity;GO:0005524, ATP binding;GO:0006468, protein phosphorylation;GO:0016021, integral component of membrane	-
TRINITY_DN93701_c1_g1	24.4508803333	2.02031	3.5972378243300005	3.98583439397e-06	0.00298311915322	up	-	-	gi|1021030681|gb|KZM88466.1| hypothetical protein DCAR_025541 [Daucus carota subsp. sativus] 3.0e-20	-	-	-	tr|M5WV69|M5WV69_PRUPE Uncharacterized protein OS=Prunus persica GN=PRUPE_ppa011066mg PE=4 SV=1 4.9e-15	GO:0005789, endoplasmic reticulum membrane;GO:0006506, GPI anchor biosynthetic process;GO:0016021, integral component of membrane	K05287-ko00563 Glycosylphosphatidylinositol(GPI)-anchor biosynthesis
TRINITY_DN98113_c2_g4	0.1956886	24.0652233333	-6.9422462888	2.01269249984e-05	0.0105539022634	down	-	-	gi|1021029915|gb|KZM87700.1| hypothetical protein DCAR_024801 [Daucus carota subsp. sativus] 4.9e-38	-	-	-	-	-	-
TRINITY_DN94493_c1_g8	43.3480666667	12.011833333299998	1.8515112879099997	0.00017735828983499999	0.045795740747	up	-	-	-	-	-	-	-	-	-
TRINITY_DN75556_c1_g2	12.8116733333	0.0001	16.9670993929	8.01232931493e-05	0.0272713354459	up	-	-	gi|1021054188|gb|KZN11966.1| hypothetical protein DCAR_004622 [Daucus carota subsp. sativus] 1.5e-11	-	-	sp|Q9FN67|Y5133_ARATH BTB/POZ domain-containing protein At5g41330 OS=Arabidopsis thaliana GN=At5g41330 PE=2 SV=1 1.78402e-06	tr|M5WEB5|M5WEB5_PRUPE Uncharacterized protein (Fragment) OS=Prunus persica GN=PRUPE_ppa005561m1g PE=4 SV=1 1.2e-08	GO:0016567, protein ubiquitination;GO:0051260, protein homooligomerization	-
TRINITY_DN92357_c0_g2	5.460220099999999	0.656924	3.05516072806	1.1405104624700001e-06	0.00131213175326	up	pfam04842, DUF639, Plant protein of unknown function (DUF639). Plant protein of unknown function. 5.77524e-76	-	gi|1021034195|gb|KZM91979.1| hypothetical protein DCAR_020656 [Daucus carota subsp. sativus] 2.0e-97	gi|1027085794|ref|XM_008245902.2| PREDICTED: Prunus mume uncharacterized LOC103342292 (LOC103342292), mRNA 4.60358e-64	pfam04842, DUF639, Plant protein of unknown function (DUF639). Plant protein of unknown function. 1.16655e-76	-	tr|M5VUW7|M5VUW7_PRUPE Uncharacterized protein OS=Prunus persica GN=PRUPE_ppa026757mg PE=4 SV=1 2.6e-65	-	-
TRINITY_DN76943_c1_g1	0.25081866666700003	8.058705999999999	-5.0058315745	0.000145625372832	0.0402536455716	down	-	-	-	-	-	-	-	-	-
TRINITY_DN85363_c1_g1	622.500013085	8.76044223641	6.15092635684	0.00011087449026399999	0.0333844822598	up	-	-	gi|1021033845|gb|KZM91629.1| hypothetical protein DCAR_021006 [Daucus carota subsp. sativus] 1.9e-12	gi|44894185|gb|AY529717.1| Cloning vector pADIS1, complete sequence 2.21394e-11	-	-	-	-	-
TRINITY_DN89956_c2_g3	9.057051333330001	0.8190613	3.46699809959	4.903218690100001e-05	0.0194819537665	up	-	-	gi|1021028640|gb|KZM86425.1| hypothetical protein DCAR_023559 [Daucus carota subsp. sativus] 1.3e-90	-	-	-	-	-	-
TRINITY_DN81915_c1_g1	5.80719313333	0.080825	6.16689560284	4.5430159594699995e-06	0.00325944434599	up	-	-	-	-	-	-	-	-	-
TRINITY_DN86156_c1_g1	0.0772353333333	7.110408866669999	-6.52452771338	3.39018265233e-05	0.0153287473502	down	-	-	-	-	-	-	-	-	-
TRINITY_DN80943_c0_g4	8.709506666669999	0.48365533333300004	4.17053978955	0.00016495214096299998	0.04339536153490001	up	-	-	-	-	-	-	-	-	-
TRINITY_DN91579_c0_g5	0.029858666666700003	5.368119999999999	-7.490123368330001	1.4304339121799999e-06	0.00149000955161	down	-	-	-	-	-	-	-	-	-
TRINITY_DN96831_c1_g1	0.235411333333	22.0495603333	-6.54942230135	1.9775312223e-06	0.00194018790114	down	-	-	-	-	-	-	-	-	-
TRINITY_DN85318_c0_g3	14.23971	0.0001	17.1195602397	3.3739622014e-11	4.3144200999899996e-07	up	-	-	-	-	-	-	-	-	-
TRINITY_DN85549_c0_g1	0.050204	53.5034023333	-10.0576126061	8.03558195917e-05	0.0272713354459	down	-	-	-	-	-	-	-	-	-
TRINITY_DN90572_c1_g2	11.461288850399999	0.4059145	4.8194496010000005	4.53358193099e-05	0.018200914708599997	up	pfam14372, DUF4413, Domain of unknown function (DUF4413). This domain is part of an RNase-H fold section of longer proteins some of which are transposable elements possibly of the Pong type, since some members are putative Tam3 transposases. 4.58939e-22	KOG1121, KOG1121, KOG1121, Tam3-transposase (Ac family) [Replication, recombination and repair]. 1.92484e-106	gi|595887375|ref|XP_007213385.1| hypothetical protein PRUPE_ppa026473mg [Prunus persica] 4.8e-168	-	pfam14372, DUF4413, Domain of unknown function (DUF4413). This domain is part of an RNase-H fold section of longer proteins some of which are transposable elements possibly of the Pong type, since some members are putative Tam3 transposases. 1.09644e-22	sp|Q6AVI0|RSLE2_ORYSJ Zinc finger BED domain-containing protein RICESLEEPER 2 OS=Oryza sativa subsp. japonica GN=Os03g0733400 PE=2 SV=1 1.44023e-95	tr|M5WLL1|M5WLL1_PRUPE Uncharacterized protein OS=Prunus persica GN=PRUPE_ppa026473mg PE=4 SV=1 3.6e-168	GO:0000977, RNA polymerase II regulatory region sequence-specific DNA binding;GO:0003677, DNA binding;GO:0003700, DNA binding transcription factor activity;GO:0005634, nucleus;GO:0006351, transcription, DNA-templated;GO:0006357, regulation of transcription by RNA polymerase II;GO:0009791, post-embryonic development;GO:0046872, metal ion binding	-
TRINITY_DN75333_c1_g2	7.540489666669999	0.304166633333	4.63172440755	3.15787220386e-05	0.0145757548035	up	-	-	-	-	-	-	-	-	-
TRINITY_DN79763_c2_g4	10.2580646667	0.0001	16.6463990456	9.43240378533e-10	5.193346775580001e-06	up	cd03009, TryX_like_TryX_NRX, Tryparedoxin (TryX)-like family, TryX and nucleoredoxin (NRX) subfamily; TryX and NRX are thioredoxin (TRX)-like protein disulfide oxidoreductases that alter the redox state of target proteins via the reversible oxidation of an active center CXXC motif. TryX is involved in the regulation of oxidative stress in parasitic trypanosomatids by reducing TryX peroxidase, whi…	-	gi|1021036762|gb|KZM94545.1| hypothetical protein DCAR_017788 [Daucus carota subsp. sativus] 3.8e-33	-	-	sp|Q0JIL1|NRX2_ORYSJ Probable nucleoredoxin 2 OS=Oryza sativa subsp. japonica GN=Os01g0794400 PE=2 SV=1 1.94304e-09	tr|F6HHU5|F6HHU5_VITVI Putative uncharacterized protein OS=Vitis vinifera GN=VIT_01s0127g00600 PE=4 SV=1 4.4e-13	GO:0047134, protein-disulfide reductase activity	-
