# Supplementary material for: De novo Transcriptome Sequencing Coupled With Co-expression Analysis Reveal the Transcriptional Regulation of Key Genes Involved in the Formation of Active Ingredients in Peucedanum praeruptorum Dunn Under Bolting Period
Source: Frontiers journal article supplement (doi:10.3389/fgene.2021.683037), 2021-06-14
Supplement: Data_Sheet_6.zip [file Data_Sheet_6.zip]

id	Description	Significant	Annotated	Pvalue	Qvalue	Signi_id	Signi_symbol
ko00940	Phenylpropanoid biosynthesis	9/138	145/10475	0.000122657835059002	0.0147189402070803	TRINITY_DN77989_c3_g2,TRINITY_DN86350_c0_g1,TRINITY_DN75021_c0_g3,TRINITY_DN95188_c0_g1,TRINITY_DN95807_c3_g1,TRINITY_DN81440_c1_g1,TRINITY_DN95494_c1_g1,TRINITY_DN74684_c0_g2,TRINITY_DN81857_c0_g3	TRINITY_DN77989_c3_g2,TRINITY_DN86350_c0_g1,TRINITY_DN75021_c0_g3,TRINITY_DN95188_c0_g1,TRINITY_DN95807_c3_g1,TRINITY_DN81440_c1_g1,TRINITY_DN95494_c1_g1,TRINITY_DN74684_c0_g2,TRINITY_DN81857_c0_g3
ko00941	Flavonoid biosynthesis	4/138	38/10475	0.00150388779669356	0.0902332678016138	TRINITY_DN77989_c3_g2,TRINITY_DN75021_c0_g3,TRINITY_DN96835_c0_g1,TRINITY_DN95494_c1_g1	TRINITY_DN77989_c3_g2,TRINITY_DN75021_c0_g3,TRINITY_DN96835_c0_g1,TRINITY_DN95494_c1_g1
ko00945	Stilbenoid, diarylheptanoid and gingerol biosynthesis	3/138	23/10475	0.00326663782498889	0.130665512999556	TRINITY_DN77989_c3_g2,TRINITY_DN75021_c0_g3,TRINITY_DN95494_c1_g1	TRINITY_DN77989_c3_g2,TRINITY_DN75021_c0_g3,TRINITY_DN95494_c1_g1
ko00906	Carotenoid biosynthesis	4/138	52/10475	0.00478613287938434	0.14358398638153	TRINITY_DN92852_c0_g3,TRINITY_DN74872_c1_g1,TRINITY_DN70885_c1_g1,TRINITY_DN89214_c0_g1	TRINITY_DN92852_c0_g3,TRINITY_DN74872_c1_g1,TRINITY_DN70885_c1_g1,TRINITY_DN89214_c0_g1
ko04139	Regulation of mitophagy - yeast	5/138	96/10475	0.00866088650145639	0.189692113923203	TRINITY_DN88225_c4_g2,TRINITY_DN88225_c4_g1,TRINITY_DN97232_c2_g1,TRINITY_DN93037_c0_g2,TRINITY_DN96006_c2_g4	TRINITY_DN88225_c4_g2,TRINITY_DN88225_c4_g1,TRINITY_DN97232_c2_g1,TRINITY_DN93037_c0_g2,TRINITY_DN96006_c2_g4
ko04075	Plant hormone signal transduction	9/138	272/10475	0.00979108731901738	0.189692113923203	TRINITY_DN84708_c1_g1,TRINITY_DN85980_c1_g1,TRINITY_DN86210_c0_g1,TRINITY_DN68434_c0_g1,TRINITY_DN95221_c2_g3,TRINITY_DN97471_c1_g1,TRINITY_DN94649_c0_g3,TRINITY_DN91644_c0_g1,TRINITY_DN91840_c1_g1	TRINITY_DN84708_c1_g1,TRINITY_DN85980_c1_g1,TRINITY_DN86210_c0_g1,TRINITY_DN68434_c0_g1,TRINITY_DN95221_c2_g3,TRINITY_DN97471_c1_g1,TRINITY_DN94649_c0_g3,TRINITY_DN91644_c0_g1,TRINITY_DN91840_c1_g1
ko00130	Ubiquinone and other terpenoid-quinone biosynthesis	4/138	66/10475	0.0110653733121868	0.189692113923203	TRINITY_DN96246_c1_g3,TRINITY_DN89209_c2_g1,TRINITY_DN95494_c1_g1,TRINITY_DN87881_c0_g2	TRINITY_DN96246_c1_g3,TRINITY_DN89209_c2_g1,TRINITY_DN95494_c1_g1,TRINITY_DN87881_c0_g2
ko04072	Phospholipase D signaling pathway	4/138	69/10475	0.0128791280893031	0.193186921339546	TRINITY_DN95123_c1_g2,TRINITY_DN97232_c2_g1,TRINITY_DN75496_c1_g1,TRINITY_DN93037_c0_g2	TRINITY_DN95123_c1_g2,TRINITY_DN97232_c2_g1,TRINITY_DN75496_c1_g1,TRINITY_DN93037_c0_g2
ko00562	Inositol phosphate metabolism	5/138	116/10475	0.0184742121014488	0.246322828019317	TRINITY_DN94663_c1_g2,TRINITY_DN76839_c0_g1,TRINITY_DN97556_c2_g1,TRINITY_DN93037_c0_g2,TRINITY_DN99055_c10_g1	TRINITY_DN94663_c1_g2,TRINITY_DN76839_c0_g1,TRINITY_DN97556_c2_g1,TRINITY_DN93037_c0_g2,TRINITY_DN99055_c10_g1
ko00511	Other glycan degradation	3/138	47/10475	0.0237935358480488	0.265147118701101	TRINITY_DN99036_c3_g3,TRINITY_DN91503_c0_g3,TRINITY_DN96045_c0_g1	TRINITY_DN99036_c3_g3,TRINITY_DN91503_c0_g3,TRINITY_DN96045_c0_g1
ko04919	Thyroid hormone signaling pathway	4/138	85/10475	0.0257064834110887	0.265147118701101	TRINITY_DN94399_c1_g1,TRINITY_DN94663_c1_g2,TRINITY_DN71558_c1_g1,TRINITY_DN97232_c2_g1	TRINITY_DN94399_c1_g1,TRINITY_DN94663_c1_g2,TRINITY_DN71558_c1_g1,TRINITY_DN97232_c2_g1
ko04630	Jak-STAT signaling pathway	2/138	20/10475	0.0280359403614892	0.265147118701101	TRINITY_DN94399_c1_g1,TRINITY_DN97232_c2_g1	TRINITY_DN94399_c1_g1,TRINITY_DN97232_c2_g1
ko04621	NOD-like receptor signaling pathway	2/138	21/10475	0.0307238488903806	0.265147118701101	TRINITY_DN82963_c1_g4,TRINITY_DN96396_c2_g2	TRINITY_DN82963_c1_g4,TRINITY_DN96396_c2_g2
ko00565	Ether lipid metabolism	3/138	52/10475	0.0309338305151285	0.265147118701101	TRINITY_DN94663_c1_g2,TRINITY_DN86778_c1_g4,TRINITY_DN95123_c1_g2	TRINITY_DN94663_c1_g2,TRINITY_DN86778_c1_g4,TRINITY_DN95123_c1_g2
ko04016	MAPK signaling pathway - plant	5/138	136/10475	0.0337477061654339	0.26774207639445	TRINITY_DN90825_c1_g2,TRINITY_DN85980_c1_g1,TRINITY_DN68434_c0_g1,TRINITY_DN97471_c1_g1,TRINITY_DN91644_c0_g1	TRINITY_DN90825_c1_g2,TRINITY_DN85980_c1_g1,TRINITY_DN68434_c0_g1,TRINITY_DN97471_c1_g1,TRINITY_DN91644_c0_g1
ko00460	Cyanoamino acid metabolism	3/138	55/10475	0.03569894351926	0.26774207639445	TRINITY_DN83600_c0_g1,TRINITY_DN95807_c3_g1,TRINITY_DN76611_c0_g2	TRINITY_DN83600_c0_g1,TRINITY_DN95807_c3_g1,TRINITY_DN76611_c0_g2
ko04140	Regulation of autophagy	3/138	65/10475	0.0541189326587264	0.367724655070412	TRINITY_DN88225_c4_g2,TRINITY_DN91758_c3_g4,TRINITY_DN88225_c4_g1	TRINITY_DN88225_c4_g2,TRINITY_DN91758_c3_g4,TRINITY_DN88225_c4_g1
ko04151	PI3K-Akt signaling pathway	5/138	156/10475	0.0551586982605618	0.367724655070412	TRINITY_DN91758_c3_g4,TRINITY_DN82963_c1_g4,TRINITY_DN97232_c2_g1,TRINITY_DN92816_c0_g1,TRINITY_DN96396_c2_g2	TRINITY_DN91758_c3_g4,TRINITY_DN82963_c1_g4,TRINITY_DN97232_c2_g1,TRINITY_DN92816_c0_g1,TRINITY_DN96396_c2_g2
ko01220	Degradation of aromatic compounds	2/138	32/10475	0.0661070561669173	0.411622691622413	TRINITY_DN75649_c0_g1,TRINITY_DN95494_c1_g1	TRINITY_DN75649_c0_g1,TRINITY_DN95494_c1_g1
ko00900	Terpenoid backbone biosynthesis	4/138	117/10475	0.0686037819370688	0.411622691622413	TRINITY_DN90070_c0_g1,TRINITY_DN87125_c0_g3,TRINITY_DN75228_c3_g1,TRINITY_DN87944_c0_g3	TRINITY_DN90070_c0_g1,TRINITY_DN87125_c0_g3,TRINITY_DN75228_c3_g1,TRINITY_DN87944_c0_g3
ko04976	Bile secretion	2/138	35/10475	0.0773261030018296	0.429817211387343	TRINITY_DN97936_c1_g1,TRINITY_DN74096_c1_g1	TRINITY_DN97936_c1_g1,TRINITY_DN74096_c1_g1
ko04612	Antigen processing and presentation	3/138	77/10475	0.0810607301913593	0.429817211387343	TRINITY_DN73139_c0_g1,TRINITY_DN96396_c2_g2,TRINITY_DN76917_c3_g1	TRINITY_DN73139_c0_g1,TRINITY_DN96396_c2_g2,TRINITY_DN76917_c3_g1
ko04011	MAPK signaling pathway - yeast	3/138	78/10475	0.0835263787655816	0.429817211387343	TRINITY_DN76839_c0_g1,TRINITY_DN93037_c0_g2,TRINITY_DN99055_c10_g1	TRINITY_DN76839_c0_g1,TRINITY_DN93037_c0_g2,TRINITY_DN99055_c10_g1
ko04961	Endocrine and other factor-regulated calcium reabsorption	2/138	38/10475	0.0890932220533389	0.429817211387343	TRINITY_DN79885_c0_g2,TRINITY_DN75496_c1_g1	TRINITY_DN79885_c0_g2,TRINITY_DN75496_c1_g1
ko00590	Arachidonic acid metabolism	2/138	39/10475	0.0931270624672576	0.429817211387343	TRINITY_DN86778_c1_g4,TRINITY_DN83600_c0_g1	TRINITY_DN86778_c1_g4,TRINITY_DN83600_c0_g1
ko02010	ABC transporters	2/138	39/10475	0.0931270624672576	0.429817211387343	TRINITY_DN97936_c1_g1,TRINITY_DN74096_c1_g1	TRINITY_DN97936_c1_g1,TRINITY_DN74096_c1_g1
ko04626	Plant-pathogen interaction	5/138	186/10475	0.0991463819786648	0.439487835238126	TRINITY_DN82963_c1_g4,TRINITY_DN98770_c4_g2,TRINITY_DN73440_c0_g1,TRINITY_DN85343_c1_g1,TRINITY_DN96396_c2_g2	TRINITY_DN82963_c1_g4,TRINITY_DN98770_c4_g2,TRINITY_DN73440_c0_g1,TRINITY_DN85343_c1_g1,TRINITY_DN96396_c2_g2
ko00564	Glycerophospholipid metabolism	5/138	191/10475	0.107815084130919	0.439487835238126	TRINITY_DN94663_c1_g2,TRINITY_DN88748_c0_g4,TRINITY_DN86778_c1_g4,TRINITY_DN95123_c1_g2,TRINITY_DN98459_c1_g1	TRINITY_DN94663_c1_g2,TRINITY_DN88748_c0_g4,TRINITY_DN86778_c1_g4,TRINITY_DN95123_c1_g2,TRINITY_DN98459_c1_g1
ko00280	Valine, leucine and isoleucine degradation	4/138	138/10475	0.109054293727146	0.439487835238126	TRINITY_DN95226_c1_g1,TRINITY_DN97556_c2_g1,TRINITY_DN76380_c0_g1,TRINITY_DN87622_c1_g4	TRINITY_DN95226_c1_g1,TRINITY_DN97556_c2_g1,TRINITY_DN76380_c0_g1,TRINITY_DN87622_c1_g4
ko00720	Carbon fixation pathways in prokaryotes	3/138	88/10475	0.109871958809532	0.439487835238126	TRINITY_DN85031_c0_g2,TRINITY_DN93398_c0_g1,TRINITY_DN98899_c0_g1	TRINITY_DN85031_c0_g2,TRINITY_DN93398_c0_g1,TRINITY_DN98899_c0_g1
ko04066	HIF-1 signaling pathway	3/138	94/10475	0.127030191383254	0.491729773096467	TRINITY_DN94399_c1_g1,TRINITY_DN97232_c2_g1,TRINITY_DN98285_c2_g1	TRINITY_DN94399_c1_g1,TRINITY_DN97232_c2_g1,TRINITY_DN98285_c2_g1
ko00626	Naphthalene degradation	1/138	12/10475	0.147195942637822	0.528048055708901	TRINITY_DN75649_c0_g1	TRINITY_DN75649_c0_g1
ko04068	FoxO signaling pathway	3/138	101/10475	0.148165353792042	0.528048055708901	TRINITY_DN94399_c1_g1,TRINITY_DN91758_c3_g4,TRINITY_DN97414_c0_g1	TRINITY_DN94399_c1_g1,TRINITY_DN91758_c3_g4,TRINITY_DN97414_c0_g1
ko04920	Adipocytokine signaling pathway	2/138	52/10475	0.149613615784188	0.528048055708901	TRINITY_DN91758_c3_g4,TRINITY_DN97232_c2_g1	TRINITY_DN91758_c3_g4,TRINITY_DN97232_c2_g1
ko03018	RNA degradation	5/138	222/10475	0.169143689138765	0.576127057070113	TRINITY_DN92237_c0_g5,TRINITY_DN74568_c0_g3,TRINITY_DN94607_c0_g1,TRINITY_DN96171_c0_g1,TRINITY_DN84842_c1_g1	TRINITY_DN92237_c0_g5,TRINITY_DN74568_c0_g3,TRINITY_DN94607_c0_g1,TRINITY_DN96171_c0_g1,TRINITY_DN84842_c1_g1
ko04915	Estrogen signaling pathway	2/138	57/10475	0.172838117121034	0.576127057070113	TRINITY_DN82963_c1_g4,TRINITY_DN96396_c2_g2	TRINITY_DN82963_c1_g4,TRINITY_DN96396_c2_g2
ko04712	Circadian rhythm - plant	2/138	59/10475	0.182288071736947	0.591204556984693	TRINITY_DN87544_c1_g3,TRINITY_DN98591_c5_g2	TRINITY_DN87544_c1_g3,TRINITY_DN98591_c5_g2
ko00430	Taurine and hypotaurine metabolism	1/138	16/10475	0.19131149756113	0.595129560185205	TRINITY_DN83600_c0_g1	TRINITY_DN83600_c0_g1
ko04070	Phosphatidylinositol signaling system	3/138	115/10475	0.193417107060192	0.595129560185205	TRINITY_DN76839_c0_g1,TRINITY_DN93037_c0_g2,TRINITY_DN99055_c10_g1	TRINITY_DN76839_c0_g1,TRINITY_DN93037_c0_g2,TRINITY_DN99055_c10_g1
ko04144	Endocytosis	6/138	298/10475	0.199864778880028	0.599594336640084	TRINITY_DN79885_c0_g2,TRINITY_DN95123_c1_g2,TRINITY_DN75496_c1_g1,TRINITY_DN96030_c0_g1,TRINITY_DN94892_c0_g1,TRINITY_DN93037_c0_g2	TRINITY_DN79885_c0_g2,TRINITY_DN95123_c1_g2,TRINITY_DN75496_c1_g1,TRINITY_DN96030_c0_g1,TRINITY_DN94892_c0_g1,TRINITY_DN93037_c0_g2
ko00680	Methane metabolism	3/138	119/10475	0.206935854717152	0.605665916245324	TRINITY_DN85031_c0_g2,TRINITY_DN93398_c0_g1,TRINITY_DN76611_c0_g2	TRINITY_DN85031_c0_g2,TRINITY_DN93398_c0_g1,TRINITY_DN76611_c0_g2
ko00630	Glyoxylate and dicarboxylate metabolism	4/138	182/10475	0.218815396772357	0.620717816472157	TRINITY_DN98131_c0_g1,TRINITY_DN81660_c3_g2,TRINITY_DN76611_c0_g2,TRINITY_DN74648_c0_g1	TRINITY_DN98131_c0_g1,TRINITY_DN81660_c3_g2,TRINITY_DN76611_c0_g2,TRINITY_DN74648_c0_g1
ko00591	Linoleic acid metabolism	1/138	19/10475	0.222904403763552	0.620717816472157	TRINITY_DN86778_c1_g4	TRINITY_DN86778_c1_g4
ko04113	Meiosis - yeast	3/138	125/10475	0.227596532706458	0.620717816472157	TRINITY_DN95327_c1_g1,TRINITY_DN95490_c0_g2,TRINITY_DN89685_c1_g2	TRINITY_DN95327_c1_g1,TRINITY_DN95490_c0_g2,TRINITY_DN89685_c1_g2
ko04110	Cell cycle	4/138	194/10475	0.252834122085483	0.664379195539288	TRINITY_DN94399_c1_g1,TRINITY_DN95327_c1_g1,TRINITY_DN95490_c0_g2,TRINITY_DN89685_c1_g2	TRINITY_DN94399_c1_g1,TRINITY_DN95327_c1_g1,TRINITY_DN95490_c0_g2,TRINITY_DN89685_c1_g2
ko00710	Carbon fixation in photosynthetic organisms	3/138	133/10475	0.255713205832972	0.664379195539288	TRINITY_DN85031_c0_g2,TRINITY_DN93398_c0_g1,TRINITY_DN98285_c2_g1	TRINITY_DN85031_c0_g2,TRINITY_DN93398_c0_g1,TRINITY_DN98285_c2_g1
ko04012	ErbB signaling pathway	1/138	23/10475	0.26312994188965	0.664379195539288	TRINITY_DN97232_c2_g1	TRINITY_DN97232_c2_g1
ko00270	Cysteine and methionine metabolism	4/138	203/10475	0.279041137324189	0.664379195539288	TRINITY_DN94594_c0_g1,TRINITY_DN95226_c1_g1,TRINITY_DN74234_c0_g4,TRINITY_DN70805_c2_g2	TRINITY_DN94594_c0_g1,TRINITY_DN95226_c1_g1,TRINITY_DN74234_c0_g4,TRINITY_DN70805_c2_g2
ko00625	Chloroalkane and chloroalkene degradation	1/138	25/10475	0.282460512896331	0.664379195539288	TRINITY_DN75649_c0_g1	TRINITY_DN75649_c0_g1
ko04014	Ras signaling pathway	2/138	81/10475	0.289147072781595	0.664379195539288	TRINITY_DN95123_c1_g2,TRINITY_DN92492_c0_g2	TRINITY_DN95123_c1_g2,TRINITY_DN92492_c0_g2
ko04142	Lysosome	3/138	143/10475	0.291479984978671	0.664379195539288	TRINITY_DN79885_c0_g2,TRINITY_DN82781_c0_g1,TRINITY_DN94542_c0_g6	TRINITY_DN79885_c0_g2,TRINITY_DN82781_c0_g1,TRINITY_DN94542_c0_g6
ko00260	Glycine, serine and threonine metabolism	3/138	147/10475	0.30590144637477	0.664379195539288	TRINITY_DN95226_c1_g1,TRINITY_DN81660_c3_g2,TRINITY_DN76611_c0_g2	TRINITY_DN95226_c1_g1,TRINITY_DN81660_c3_g2,TRINITY_DN76611_c0_g2
ko04024	cAMP signaling pathway	2/138	85/10475	0.308661964788334	0.664379195539288	TRINITY_DN94399_c1_g1,TRINITY_DN95123_c1_g2	TRINITY_DN94399_c1_g1,TRINITY_DN95123_c1_g2
ko00360	Phenylalanine metabolism	2/138	86/10475	0.313526109901278	0.664379195539288	TRINITY_DN77989_c3_g2,TRINITY_DN95494_c1_g1	TRINITY_DN77989_c3_g2,TRINITY_DN95494_c1_g1
ko00730	Thiamine metabolism	1/138	29/10475	0.319624097060486	0.664379195539288	TRINITY_DN87944_c0_g3	TRINITY_DN87944_c0_g3
ko04540	Gap junction	1/138	29/10475	0.319624097060486	0.664379195539288	TRINITY_DN81644_c0_g1	TRINITY_DN81644_c0_g1
ko04340	Hedgehog signaling pathway	1/138	30/10475	0.328612405944811	0.664379195539288	TRINITY_DN80708_c0_g1	TRINITY_DN80708_c0_g1
ko00052	Galactose metabolism	2/138	90/10475	0.332904275267915	0.664379195539288	TRINITY_DN85961_c0_g2,TRINITY_DN86077_c1_g6	TRINITY_DN85961_c0_g2,TRINITY_DN86077_c1_g6
ko00100	Steroid biosynthesis	2/138	90/10475	0.332904275267915	0.664379195539288	TRINITY_DN86778_c1_g4,TRINITY_DN96650_c2_g2	TRINITY_DN86778_c1_g4,TRINITY_DN96650_c2_g2
ko00909	Sesquiterpenoid and triterpenoid biosynthesis	1/138	31/10475	0.337482821261193	0.664379195539288	TRINITY_DN73654_c0_g1	TRINITY_DN73654_c0_g1
ko04213	Longevity regulating pathway - multiple species	2/138	91/10475	0.337726091065805	0.664379195539288	TRINITY_DN91758_c3_g4,TRINITY_DN97232_c2_g1	TRINITY_DN91758_c3_g4,TRINITY_DN97232_c2_g1
ko00561	Glycerolipid metabolism	3/138	165/10475	0.370886819458724	0.678211353124905	TRINITY_DN86778_c1_g4,TRINITY_DN68792_c0_g1,TRINITY_DN98459_c1_g1	TRINITY_DN86778_c1_g4,TRINITY_DN68792_c0_g1,TRINITY_DN98459_c1_g1
ko04330	Notch signaling pathway	1/138	35/10475	0.371815954485419	0.678211353124905	TRINITY_DN94399_c1_g1	TRINITY_DN94399_c1_g1
ko04916	Melanogenesis	1/138	35/10475	0.371815954485419	0.678211353124905	TRINITY_DN94399_c1_g1	TRINITY_DN94399_c1_g1
ko04666	Fc gamma R-mediated phagocytosis	2/138	99/10475	0.375885272678015	0.678211353124905	TRINITY_DN95123_c1_g2,TRINITY_DN93037_c0_g2	TRINITY_DN95123_c1_g2,TRINITY_DN93037_c0_g2
ko04520	Adherens junction	1/138	36/10475	0.380119536696244	0.678211353124905	TRINITY_DN94399_c1_g1	TRINITY_DN94399_c1_g1
ko00790	Folate biosynthesis	1/138	37/10475	0.388314143836384	0.678211353124905	TRINITY_DN94037_c1_g2	TRINITY_DN94037_c1_g2
ko04112	Cell cycle - Caulobacter	1/138	37/10475	0.388314143836384	0.678211353124905	TRINITY_DN74712_c0_g1	TRINITY_DN74712_c0_g1
ko04211	Longevity regulating pathway - mammal	2/138	102/10475	0.38997152804682	0.678211353124905	TRINITY_DN91758_c3_g4,TRINITY_DN97232_c2_g1	TRINITY_DN91758_c3_g4,TRINITY_DN97232_c2_g1
ko00830	Retinol metabolism	1/138	38/10475	0.396401195776466	0.679544907045371	TRINITY_DN75649_c0_g1	TRINITY_DN75649_c0_g1
ko04912	GnRH signaling pathway	1/138	39/10475	0.404382094021445	0.683462694120753	TRINITY_DN95123_c1_g2	TRINITY_DN95123_c1_g2
ko04111	Cell cycle - yeast	3/138	177/10475	0.413684984808197	0.689474974680328	TRINITY_DN95327_c1_g1,TRINITY_DN95490_c0_g2,TRINITY_DN89685_c1_g2	TRINITY_DN95327_c1_g1,TRINITY_DN95490_c0_g2,TRINITY_DN89685_c1_g2
ko04918	Thyroid hormone synthesis	1/138	41/10475	0.420030945029448	0.690461827445668	TRINITY_DN82963_c1_g4	TRINITY_DN82963_c1_g4
ko00640	Propanoate metabolism	2/138	115/10475	0.449260304711218	0.719561251813488	TRINITY_DN97556_c2_g1,TRINITY_DN76380_c0_g1	TRINITY_DN97556_c2_g1,TRINITY_DN76380_c0_g1
ko03020	RNA polymerase	2/138	116/10475	0.453689859769106	0.719561251813488	TRINITY_DN89002_c0_g1,TRINITY_DN80520_c0_g1	TRINITY_DN89002_c0_g1,TRINITY_DN80520_c0_g1
ko00670	One carbon pool by folate	1/138	47/10475	0.464570050900611	0.719561251813488	TRINITY_DN76611_c0_g2	TRINITY_DN76611_c0_g2
ko04120	Ubiquitin mediated proteolysis	4/138	270/10475	0.477942795814518	0.719561251813488	TRINITY_DN97736_c4_g6,TRINITY_DN73145_c2_g1,TRINITY_DN78505_c2_g1,TRINITY_DN87416_c0_g5	TRINITY_DN97736_c4_g6,TRINITY_DN73145_c2_g1,TRINITY_DN78505_c2_g1,TRINITY_DN87416_c0_g5
ko04341	Hedgehog signaling pathway - Fly	1/138	49/10475	0.478648286085396	0.719561251813488	TRINITY_DN80708_c0_g1	TRINITY_DN80708_c0_g1
ko04710	Circadian rhythm	1/138	49/10475	0.478648286085396	0.719561251813488	TRINITY_DN91758_c3_g4	TRINITY_DN91758_c3_g4
ko04724	Glutamatergic synapse	1/138	51/10475	0.492358969816423	0.719561251813488	TRINITY_DN95123_c1_g2	TRINITY_DN95123_c1_g2
ko04212	Longevity regulating pathway - worm	2/138	126/10475	0.496841066377495	0.719561251813488	TRINITY_DN92237_c0_g5,TRINITY_DN97232_c2_g1	TRINITY_DN92237_c0_g5,TRINITY_DN97232_c2_g1
ko04721	Synaptic vesicle cycle	2/138	126/10475	0.496841066377495	0.719561251813488	TRINITY_DN79885_c0_g2,TRINITY_DN75496_c1_g1	TRINITY_DN79885_c0_g2,TRINITY_DN75496_c1_g1
ko00563	Glycosylphosphatidylinositol(GPI)-anchor biosynthesis	1/138	53/10475	0.505711629821076	0.719561251813488	TRINITY_DN95116_c2_g1	TRINITY_DN95116_c2_g1
ko01200	Carbon metabolism	8/138	588/10475	0.514899420169587	0.719561251813488	TRINITY_DN85031_c0_g2,TRINITY_DN93398_c0_g1,TRINITY_DN98131_c0_g1,TRINITY_DN97556_c2_g1,TRINITY_DN81660_c3_g2,TRINITY_DN76611_c0_g2,TRINITY_DN74648_c0_g1,TRINITY_DN98285_c2_g1	TRINITY_DN85031_c0_g2,TRINITY_DN93398_c0_g1,TRINITY_DN98131_c0_g1,TRINITY_DN97556_c2_g1,TRINITY_DN81660_c3_g2,TRINITY_DN76611_c0_g2,TRINITY_DN74648_c0_g1,TRINITY_DN98285_c2_g1
ko04350	TGF-beta signaling pathway	1/138	55/10475	0.518715548616682	0.719561251813488	TRINITY_DN94399_c1_g1	TRINITY_DN94399_c1_g1
ko04720	Long-term potentiation	1/138	55/10475	0.518715548616682	0.719561251813488	TRINITY_DN94399_c1_g1	TRINITY_DN94399_c1_g1
ko04922	Glucagon signaling pathway	2/138	132/10475	0.521681907564779	0.719561251813488	TRINITY_DN94399_c1_g1,TRINITY_DN91758_c3_g4	TRINITY_DN94399_c1_g1,TRINITY_DN91758_c3_g4
ko00062	Fatty acid elongation	1/138	57/10475	0.531379769775795	0.724608776966993	TRINITY_DN79849_c1_g1	TRINITY_DN79849_c1_g1
ko04141	Protein processing in endoplasmic reticulum	6/138	450/10475	0.547047962961339	0.737592759048996	TRINITY_DN82963_c1_g4,TRINITY_DN72745_c1_g1,TRINITY_DN96624_c0_g1,TRINITY_DN93484_c0_g1,TRINITY_DN98469_c2_g1,TRINITY_DN96396_c2_g2	TRINITY_DN82963_c1_g4,TRINITY_DN72745_c1_g1,TRINITY_DN96624_c0_g1,TRINITY_DN93484_c0_g1,TRINITY_DN98469_c2_g1,TRINITY_DN96396_c2_g2
ko04150	mTOR signaling pathway	2/138	143/10475	0.565066569243984	0.753422092325313	TRINITY_DN91758_c3_g4,TRINITY_DN97232_c2_g1	TRINITY_DN91758_c3_g4,TRINITY_DN97232_c2_g1
ko04910	Insulin signaling pathway	2/138	147/10475	0.580133968783447	0.762255638061445	TRINITY_DN91758_c3_g4,TRINITY_DN97232_c2_g1	TRINITY_DN91758_c3_g4,TRINITY_DN97232_c2_g1
ko04914	Progesterone-mediated oocyte maturation	1/138	66/10475	0.584395989180441	0.762255638061445	TRINITY_DN96396_c2_g2	TRINITY_DN96396_c2_g2
ko00020	Citrate cycle (TCA cycle)	2/138	153/10475	0.60201753407067	0.770159020076986	TRINITY_DN98899_c0_g1,TRINITY_DN74648_c0_g1	TRINITY_DN98899_c0_g1,TRINITY_DN74648_c0_g1
ko03015	mRNA surveillance pathway	3/138	237/10475	0.607985800607431	0.770159020076986	TRINITY_DN73324_c3_g1,TRINITY_DN85095_c1_g3,TRINITY_DN98602_c0_g1	TRINITY_DN73324_c3_g1,TRINITY_DN85095_c1_g3,TRINITY_DN98602_c0_g1
ko00010	Glycolysis / Gluconeogenesis	3/138	239/10475	0.613701117167079	0.770159020076986	TRINITY_DN90362_c0_g1,TRINITY_DN75649_c0_g1,TRINITY_DN98285_c2_g1	TRINITY_DN90362_c0_g1,TRINITY_DN75649_c0_g1,TRINITY_DN98285_c2_g1
ko04152	AMPK signaling pathway	2/138	157/10475	0.616127216061589	0.770159020076986	TRINITY_DN91758_c3_g4,TRINITY_DN97232_c2_g1	TRINITY_DN91758_c3_g4,TRINITY_DN97232_c2_g1
ko00592	alpha-Linolenic acid metabolism	1/138	76/10475	0.636343214822271	0.787228719367758	TRINITY_DN86778_c1_g4	TRINITY_DN86778_c1_g4
ko03008	Ribosome biogenesis in eukaryotes	3/138	260/10475	0.670324748919018	0.799669085907266	TRINITY_DN94607_c0_g1,TRINITY_DN95813_c1_g1,TRINITY_DN90653_c0_g2	TRINITY_DN94607_c0_g1,TRINITY_DN95813_c1_g1,TRINITY_DN90653_c0_g2
ko00982	Drug metabolism - cytochrome P450	1/138	84/10475	0.673215961248036	0.799669085907266	TRINITY_DN75649_c0_g1	TRINITY_DN75649_c0_g1
ko00400	Phenylalanine, tyrosine and tryptophan biosynthesis	1/138	85/10475	0.677555889777318	0.799669085907266	TRINITY_DN79188_c0_g2	TRINITY_DN79188_c0_g2
ko04921	Oxytocin signaling pathway	1/138	85/10475	0.677555889777318	0.799669085907266	TRINITY_DN91758_c3_g4	TRINITY_DN91758_c3_g4
ko01230	Biosynthesis of amino acids	6/138	519/10475	0.685913093667808	0.799669085907266	TRINITY_DN93109_c0_g1,TRINITY_DN79188_c0_g2,TRINITY_DN70805_c2_g2,TRINITY_DN76611_c0_g2,TRINITY_DN74648_c0_g1,TRINITY_DN98285_c2_g1	TRINITY_DN93109_c0_g1,TRINITY_DN79188_c0_g2,TRINITY_DN70805_c2_g2,TRINITY_DN76611_c0_g2,TRINITY_DN74648_c0_g1,TRINITY_DN98285_c2_g1
ko00350	Tyrosine metabolism	1/138	89/10475	0.694350794200307	0.799669085907266	TRINITY_DN75649_c0_g1	TRINITY_DN75649_c0_g1
ko00980	Metabolism of xenobiotics by cytochrome P450	1/138	90/10475	0.698411991042244	0.799669085907266	TRINITY_DN75649_c0_g1	TRINITY_DN75649_c0_g1
ko00513	Various types of N-glycan biosynthesis	1/138	91/10475	0.702419612153094	0.799669085907266	TRINITY_DN72745_c1_g1	TRINITY_DN72745_c1_g1
ko00860	Porphyrin and chlorophyll metabolism	1/138	92/10475	0.706374359218085	0.799669085907266	TRINITY_DN95345_c0_g1	TRINITY_DN95345_c0_g1
ko02024	Quorum sensing	1/138	95/10475	0.717928236845323	0.805153162817185	TRINITY_DN94663_c1_g2	TRINITY_DN94663_c1_g2
ko03030	DNA replication	1/138	103/10475	0.746578670710533	0.810412949915008	TRINITY_DN89685_c1_g2	TRINITY_DN89685_c1_g2
ko00620	Pyruvate metabolism	2/138	202/10475	0.749245761798158	0.810412949915008	TRINITY_DN85031_c0_g2,TRINITY_DN93398_c0_g1	TRINITY_DN85031_c0_g2,TRINITY_DN93398_c0_g1
ko00410	beta-Alanine metabolism	1/138	104/10475	0.749950454690666	0.810412949915008	TRINITY_DN97556_c2_g1	TRINITY_DN97556_c2_g1
ko00071	Fatty acid degradation	1/138	106/10475	0.756560983883245	0.810412949915008	TRINITY_DN75649_c0_g1	TRINITY_DN75649_c0_g1
ko04071	Sphingolipid signaling pathway	1/138	106/10475	0.756560983883245	0.810412949915008	TRINITY_DN95123_c1_g2	TRINITY_DN95123_c1_g2
ko04310	Wnt signaling pathway	1/138	112/10475	0.77536937368958	0.810412949915008	TRINITY_DN94399_c1_g1	TRINITY_DN94399_c1_g1
ko04810	Regulation of actin cytoskeleton	1/138	113/10475	0.778360691496281	0.810412949915008	TRINITY_DN93037_c0_g2	TRINITY_DN93037_c0_g2
ko00051	Fructose and mannose metabolism	1/138	118/10475	0.79273432169498	0.810412949915008	TRINITY_DN82642_c3_g2	TRINITY_DN82642_c3_g2
ko00230	Purine metabolism	4/138	413/10475	0.799073768188545	0.810412949915008	TRINITY_DN89002_c0_g1,TRINITY_DN80520_c0_g1,TRINITY_DN94365_c2_g2,TRINITY_DN98776_c3_g3	TRINITY_DN89002_c0_g1,TRINITY_DN80520_c0_g1,TRINITY_DN94365_c2_g2,TRINITY_DN98776_c3_g3
ko00510	N-Glycan biosynthesis	1/138	121/10475	0.800910222302382	0.810412949915008	TRINITY_DN72745_c1_g1	TRINITY_DN72745_c1_g1
ko00330	Arginine and proline metabolism	1/138	122/10475	0.803563727162559	0.810412949915008	TRINITY_DN93109_c0_g1	TRINITY_DN93109_c0_g1
ko03013	RNA transport	4/138	416/10475	0.803659508665716	0.810412949915008	TRINITY_DN73324_c3_g1,TRINITY_DN98550_c2_g1,TRINITY_DN77099_c0_g1,TRINITY_DN88221_c0_g2	TRINITY_DN73324_c3_g1,TRINITY_DN98550_c2_g1,TRINITY_DN77099_c0_g1,TRINITY_DN88221_c0_g2
ko00520	Amino sugar and nucleotide sugar metabolism	2/138	233/10475	0.816249185898511	0.816249185898511	TRINITY_DN74461_c0_g1,TRINITY_DN86077_c1_g6	TRINITY_DN74461_c0_g1,TRINITY_DN86077_c1_g6
ko00040	Pentose and glucuronate interconversions	1/138	134/10475	0.832794661970119	0.825912061457969	TRINITY_DN85146_c1_g1	TRINITY_DN85146_c1_g1
ko00250	Alanine, aspartate and glutamate metabolism	1/138	145/10475	0.855775942722701	0.835008543728111	TRINITY_DN95226_c1_g1	TRINITY_DN95226_c1_g1
ko00500	Starch and sucrose metabolism	2/138	262/10475	0.864039191009066	0.835008543728111	TRINITY_DN95807_c3_g1,TRINITY_DN96775_c3_g1	TRINITY_DN95807_c3_g1,TRINITY_DN96775_c3_g1
ko01210	2-Oxocarboxylic acid metabolism	1/138	153/10475	0.870492622272589	0.835008543728111	TRINITY_DN74648_c0_g1	TRINITY_DN74648_c0_g1
ko03040	Spliceosome	4/138	472/10475	0.874761913065762	0.835008543728111	TRINITY_DN98187_c0_g1,TRINITY_DN89398_c0_g1,TRINITY_DN92402_c0_g1,TRINITY_DN97817_c3_g2	TRINITY_DN98187_c0_g1,TRINITY_DN89398_c0_g1,TRINITY_DN92402_c0_g1,TRINITY_DN97817_c3_g2
ko00970	Aminoacyl-tRNA biosynthesis	1/138	159/10475	0.880542569164537	0.835008543728111	TRINITY_DN86555_c0_g2	TRINITY_DN86555_c0_g2
ko04114	Oocyte meiosis	1/138	161/10475	0.883717375445584	0.835008543728111	TRINITY_DN95490_c0_g2	TRINITY_DN95490_c0_g2
ko04145	Phagosome	1/138	168/10475	0.894183686463193	0.837735062688147	TRINITY_DN81644_c0_g1	TRINITY_DN81644_c0_g1
ko00480	Glutathione metabolism	1/138	176/10475	0.905004205544815	0.837735062688147	TRINITY_DN83600_c0_g1	TRINITY_DN83600_c0_g1
ko00240	Pyrimidine metabolism	2/138	298/10475	0.907546317912159	0.837735062688147	TRINITY_DN89002_c0_g1,TRINITY_DN80520_c0_g1	TRINITY_DN89002_c0_g1,TRINITY_DN80520_c0_g1
