# Supplementary material for: De novo Transcriptome Sequencing Coupled With Co-expression Analysis Reveal the Transcriptional Regulation of Key Genes Involved in the Formation of Active Ingredients in Peucedanum praeruptorum Dunn Under Bolting Period
Source: Frontiers journal article supplement (doi:10.3389/fgene.2021.683037), 2021-06-14
Supplement: Data_Sheet_7.zip [file Data_Sheet_7.zip]

Gene id	MeanTPM (C)	MeanTPM (D)	log2FoldChange	pValue	qValue	result	CDD	KOG	NR	NT	PFAM	Swissprot	TrEMBL	GO	KEGG
TRINITY_DN72152_c0_g1	2.08093233333	15.7070653333	-2.91611169833	0.000169207450083	0.0167421852578	down	-	-	gi|965674236|dbj|BAU03538.1| hypothetical protein VIGAN_UM125500, partial [Vigna angularis var. angularis] 6.3e-11	gi|401844312|gb|JX474870.1| Natipusilla limonensis strain PE3_2b 18S small subunit ribosomal RNA gene, partial sequence 0.0	-	-	tr|A0A0D2ZVE1|A0A0D2ZVE1_BRAOL Uncharacterized protein OS=Brassica oleracea var. oleracea PE=4 SV=1 4.6e-22	-	-
TRINITY_DN88611_c1_g1	30.3993738983	0.47257311666699997	6.0073602393300005	2.61607337967e-05	0.00432776821011	up	PTZ00089, PTZ00089, transketolase; Provisional. 1.25542e-160	KOG0523, KOG0523, KOG0523, Transketolase [Carbohydrate transport and metabolism]. 9.7188e-63	gi|1021047807|gb|KZN05587.1| hypothetical protein DCAR_006424 [Daucus carota subsp. sativus] 5.9e-197	gi|1025154003|ref|XM_016612599.1| PREDICTED: Nicotiana tabacum transketolase, chloroplastic-like (LOC107790645), transcript variant X2, mRNA 0.0	pfam00456, Transketolase_N, Transketolase, thiamine diphosphate binding domain. This family includes transketolase enzymes EC:2.2.1.1. and also partially matches to 2-oxoisovalerate dehydrogenase beta subunit EC:1.2.4.4. Both these enzymes utilize thiamine pyrophosphate as a cofactor, suggesting there may be common aspects in their mechanism of catalysis. 7.24784e-91	sp|Q7SIC9|TKTC_MAIZE Transketolase, chloroplastic OS=Zea mays PE=1 SV=1 0.0	tr|B9T0B2|B9T0B2_RICCO Transketolase, putative OS=Ricinus communis GN=RCOM_0262670 PE=4 SV=1 1.4e-161	GO:0004802, transketolase activity;GO:0008152, metabolic process;GO:0009535, chloroplast thylakoid membrane;GO:0019253, reductive pentose-phosphate cycle;GO:0046872, metal ion binding;GO:0047896, formaldehyde transketolase activity	K00615-ko01200 Carbon metabolism;ko01051 Biosynthesis of ansamycins;ko00710 Carbon fixation in photosynthetic organisms;ko00030 Pentose phosphate pathway;ko01230 Biosynthesis of amino acids
TRINITY_DN70087_c1_g2	0.481337333333	5.762239833330001	-3.58150947834	0.00011219662686900001	0.0123641295867	down	-	-	-	-	-	-	-	-	-
TRINITY_DN87161_c2_g2	21.409565	0.710085333333	4.91411926456	1.73739903464e-05	0.00318375675326	up	-	-	gi|1021052120|gb|KZN09898.1| hypothetical protein DCAR_002554 [Daucus carota subsp. sativus] 3.9e-11	-	-	-	-	-	-
TRINITY_DN97364_c3_g2	0.480763666667	9.9342452	-4.3690105814999995	3.6274984717e-06	0.0009809631857819999	down	-	KOG0498, KOG0498, KOG0498, K+-channel ERG and related proteins, contain PAS/PAC sensor domain [Inorganic ion transport and metabolism, Signal transduction mechanisms]. 1.82233e-17	gi|1021046766|gb|KZN04546.1| hypothetical protein DCAR_005383 [Daucus carota subsp. sativus] 9.9e-68	-	-	sp|Q9SKD7|CNGC3_ARATH Probable cyclic nucleotide-gated ion channel 3 OS=Arabidopsis thaliana GN=CNGC3 PE=2 SV=2 3.88142e-63	tr|A0A022RJ21|A0A022RJ21_ERYGU Uncharacterized protein (Fragment) OS=Erythranthe guttata GN=MIMGU_mgv1a023022mg PE=4 SV=1 9.2e-58	GO:0005216, ion channel activity;GO:0005249, voltage-gated potassium channel activity;GO:0005887, integral component of plasma membrane;GO:0016021, integral component of membrane;GO:0030552, cAMP binding;GO:0030553, cGMP binding;GO:0042391, regulation of membrane potential	K05391-ko04626 Plant-pathogen interaction
TRINITY_DN90465_c3_g2	0.0757220333333	11.4955652667	-7.246148541839999	5.26408757647e-06	0.00130997794172	down	cd04216, Phytocyanin, Phytocyanins are plant blue or type I copper proteins. Phytocyanins are plant blue or type I copper proteins. They are involved in electron transfer reactions with the Cu center transitioning between the oxidized Cu(II) form and the reduced Cu(I) form. Phytocyanins are classified into four groups: stellacyanin, plantacyanin, uclacyanin and early nodulin groups. Stellacyanin …	-	gi|1028988008|ref|XP_016748854.1| PREDICTED: blue copper protein-like [Gossypium hirsutum] 1.5e-41	-	pfam02298, Cu_bind_like, Plastocyanin-like domain. This family represents a domain found in flowering plants related to the copper binding protein plastocyanin. Some members of this family may not bind copper due to the lack of key residues. 1.10914e-19	sp|Q41001|BCP_PEA Blue copper protein OS=Pisum sativum PE=2 SV=1 4.77624e-46	tr|A0A0B0N1L0|A0A0B0N1L0_GOSAR Blue copper OS=Gossypium arboreum GN=F383_31122 PE=4 SV=1 1.1e-41	GO:0009055, electron transfer activity;GO:0016021, integral component of membrane;GO:0046872, metal ion binding;GO:0055114, oxidation-reduction process	-
TRINITY_DN89784_c0_g2	55.5741008333	11.547042	2.2668893767099996	0.00034628777226799996	0.026958287026999997	up	-	-	-	-	-	-	-	-	-
TRINITY_DN88050_c1_g5	0.0365135	6.240895333330001	-7.4171792412199995	8.28471698096e-09	6.8918588013e-06	down	cd01803, Ubiquitin, Ubiquitin. Ubiquitin (includes Ubq/RPL40e and Ubq/RPS27a fusions as well as homopolymeric multiubiquitin protein chains). 1.89532e-47	KOG0003, KOG0003, KOG0003, Ubiquitin/60s ribosomal protein L40 fusion [Translation, ribosomal structure and biogenesis]. 1.34942e-48	gi|116202449|ref|XP_001227036.1| polyubiquitin [Chaetomium globosum CBS 148.51] 6.4e-36	gi|396492503|ref|XM_003843767.1| Leptosphaeria maculans JN3 hypothetical protein (LEMA_P014660.1) mRNA, complete cds 1.02384e-65	pfam00240, ubiquitin, Ubiquitin family. This family contains a number of ubiquitin-like proteins: SUMO (smt3 homologue), Nedd8, Elongin B, Rub1, and Parkin. A number of them are thought to carry a distinctive five-residue motif termed the proteasome-interacting motif (PIM), which may have a biologically significant role in protein delivery to proteasomes and recruitment of proteasomes to transcri…	sp|P0CH09|RL402_YEAST Ubiquitin-60S ribosomal protein L40 OS=Saccharomyces cerevisiae (strain ATCC 204508 / S288c) GN=RPL40B PE=1 SV=1 2.02199e-48	tr|O49905|O49905_TOBAC Polyubiquitin OS=Nicotiana tabacum GN=TUQG2 PE=4 SV=1 4.9e-36	GO:0000027, ribosomal large subunit assembly;GO:0000055, ribosomal large subunit export from nucleus;GO:0002181, cytoplasmic translation;GO:0003735, structural constituent of ribosome;GO:0005634, nucleus;GO:0005737, cytoplasm;GO:0016567, protein ubiquitination;GO:0022625, cytosolic large ribosomal subunit;GO:0031386, protein tag;GO:0042254, ribosome biogenesis	K02977-ko03010 Ribosome
TRINITY_DN70357_c1_g2	0.0860578333333	6.202379333330001	-6.171371434480001	4.27355597076e-06	0.00111427550262	down	cd02947, TRX_family, TRX family; composed of two groups: Group I, which includes proteins that exclusively encode a TRX domain; and Group II, which are composed of fusion proteins of TRX and additional domains. Group I TRX is a small ancient protein that alter the redox state of target proteins via the reversible oxidation of an active site dithiol, present in a CXXC motif, partially exposed at t…	KOG0908, KOG0908, KOG0908, Thioredoxin-like protein [Posttranslational modification, protein turnover, chaperones]. 4.50085e-22	gi|971568205|ref|XP_006357246.2| PREDICTED: thioredoxin H2-like isoform X2 [Solanum tuberosum] 3.9e-17	gi|628212898|ref|XM_007715362.1| Bipolaris zeicola 26-R-13 hypothetical protein partial mRNA 1.71484e-53	pfam00085, Thioredoxin, Thioredoxin. Thioredoxins are small enzymes that participate in redox reactions, via the reversible oxidation of an active centre disulfide bond. Some members with only the active site are not separated from the noise. 3.35575e-21	sp|Q8TFM8|THIO_FUSCU Thioredoxin-like protein OS=Fusarium culmorum PE=1 SV=1 3.04426e-32	tr|M1BHP2|M1BHP2_SOLTU Uncharacterized protein OS=Solanum tuberosum GN=PGSC0003DMG400017632 PE=4 SV=1 2.9e-17	GO:0005623, cell;GO:0006662, glycerol ether metabolic process;GO:0015035, protein disulfide oxidoreductase activity;GO:0045454, cell redox homeostasis	-
TRINITY_DN81596_c0_g2	5.868864266669999	0.0001	15.8407937218	5.61351005316e-21	4.93028022438e-17	up	-	-	-	-	-	-	-	-	-
TRINITY_DN79660_c0_g2	263.954967183	7.94892815	5.05338766759	0.00022937774148400002	0.0206551109128	up	-	-	-	-	-	-	-	-	-
TRINITY_DN93041_c0_g1	10.2509620013	0.0001	16.645399780199998	1.9365034503900001e-16	4.832793339460001e-13	up	-	-	-	-	-	-	-	-	-
TRINITY_DN97019_c4_g1	0.545665116667	179.675912167	-8.363165477010002	2.46148419331e-06	0.000731303604873	down	-	-	gi|1021033224|gb|KZM91008.1| hypothetical protein DCAR_021627 [Daucus carota subsp. sativus] 8.3e-08	gi|703063478|ref|XM_010088668.1| Morus notabilis Agamous-like MADS-box protein AGL16 partial mRNA 2.29158e-13	-	-	tr|A0A103YBT4|A0A103YBT4_CYNCS Transcription factor, K-box OS=Cynara cardunculus var. scolymus GN=Ccrd_015483 PE=4 SV=1 9.1e-07	GO:0003677, DNA binding;GO:0003700, DNA binding transcription factor activity;GO:0005634, nucleus;GO:0006351, transcription, DNA-templated	-
TRINITY_DN75225_c3_g1	5.086968	0.29872	4.0899402810500005	5.3587073782999994e-05	0.0073364735638300005	up	-	-	-	-	-	-	-	-	-
TRINITY_DN75898_c1_g1	0.554271766667	5.962131833330001	-3.4271628492	0.00015195023146000002	0.0154330196132	down	PTZ00083, PTZ00083, 40S ribosomal protein S27; Provisional. 2.07385e-38	KOG1779, KOG1779, KOG1779, 40s ribosomal protein S27 [Translation, ribosomal structure and biogenesis]. 4.86716e-42	gi|357149024|ref|XP_003574974.1| PREDICTED: 40S ribosomal protein S27 [Brachypodium distachyon] 4.1e-29	gi|189202209|ref|XM_001937406.1| Pyrenophora tritici-repentis Pt-1C-BFP 40S ribosomal protein S27, partial mRNA 0.0	pfam01667, Ribosomal_S27e, Ribosomal protein S27. 2.32876e-21	sp|Q7RVN2|RS27_NEUCR 40S ribosomal protein S27 OS=Neurospora crassa (strain ATCC 24698 / 74-OR23-1A / CBS 708.71 / DSM 1257 / FGSC 987) GN=crp-6 PE=3 SV=1 1.46347e-49	tr|I1I9P8|I1I9P8_BRADI 40S ribosomal protein S27 OS=Brachypodium distachyon GN=BRADI3G43475 PE=3 SV=1 3.1e-29	GO:0000028, ribosomal small subunit assembly;GO:0003735, structural constituent of ribosome;GO:0006412, translation;GO:0022627, cytosolic small ribosomal subunit;GO:0046872, metal ion binding	K02978-ko03010 Ribosome
TRINITY_DN85196_c1_g2	0.866237956917	6.99870136609	-3.0142519546099997	0.00031319706624699994	0.0249943803104	down	cd09323, TDT_SLAC1_like, Tellurite-resistance/Dicarboxylate Transporter (TDT) family includes SLAC1 (Slow Anion Channel-Associated 1). SLAC1 (Slow Anion Channel-Associated 1) is a plasma membrane protein, preferentially expressed in guard cells, which encodes a distant homolog of fungal and bacterial dicarboxylate/malic acid transport proteins. It is essential for stomatal closure in response to …	-	gi|1021034560|gb|KZM92344.1| hypothetical protein DCAR_020291 [Daucus carota subsp. sativus] 7.8e-46	-	-	sp|Q9FLV9|SLAH3_ARATH S-type anion channel SLAH3 OS=Arabidopsis thaliana GN=SLAH3 PE=1 SV=1 9.27701e-50	tr|B9RIQ3|B9RIQ3_RICCO Tellurite resistance protein tehA, putative OS=Ricinus communis GN=RCOM_1581510 PE=4 SV=1 1.9e-44	GO:0005623, cell;GO:0005886, plasma membrane;GO:0006873, cellular ion homeostasis;GO:0008308, voltage-gated anion channel activity;GO:0016021, integral component of membrane	-
TRINITY_DN88686_c1_g7	1.24982983333	26.3289695	-4.396847468530001	0.00045107548080799997	0.0321363102644	down	PLN00220, PLN00220, tubulin beta chain; Provisional. 6.41477e-61	KOG1375, KOG1375, KOG1375, Beta tubulin [Cytoskeleton]. 1.59661e-54	gi|747041332|ref|XP_011072483.1| PREDICTED: tubulin beta-8 chain-like [Sesamum indicum] 4.5e-47	gi|511783111|gb|KC731434.1| Physaria fendleri putative tubulin beta-2-like protein mRNA, complete cds 6.80731e-95	pfam03953, Tubulin_C, Tubulin C-terminal domain. This family includes the tubulin alpha, beta and gamma chains. Members of this family are involved in polymer formation. Tubulins are GTPases. FtsZ can polymerize into tubes, sheets, and rings in vitro and is ubiquitous in eubacteria and archaea. Tubulin is the major component of microtubules. (The FtsZ GTPases have been split into their won family…	sp|Q40106|TBB2_LUPAL Tubulin beta-2 chain OS=Lupinus albus GN=TUBB2 PE=3 SV=1 4.12178e-61	tr|B9SPG2|B9SPG2_RICCO Tubulin beta chain, putative OS=Ricinus communis GN=RCOM_0085870 PE=3 SV=1 3.5e-47	GO:0003924, GTPase activity;GO:0005200, structural constituent of cytoskeleton;GO:0005525, GTP binding;GO:0005737, cytoplasm;GO:0005874, microtubule;GO:0007017, microtubule-based process	-
TRINITY_DN95396_c0_g5	7.18005	0.0001	16.1317062702	2.59933972093e-16	5.85048963742e-13	up	-	-	gi|1021034110|gb|KZM91894.1| hypothetical protein DCAR_020741 [Daucus carota subsp. sativus] 2.4e-11	-	-	sp|Q9LZB8|AB29B_ARATH ABC transporter B family member 29, chloroplastic OS=Arabidopsis thaliana GN=ABCB29 PE=2 SV=1 1.45943e-10	tr|A0A097P9R7|A0A097P9R7_HEVBR ABC transporter family protein OS=Hevea brasiliensis GN=ABCB29 PE=2 SV=1 8.0e-07	GO:0005215, transporter activity;GO:0005524, ATP binding;GO:0009507, chloroplast;GO:0009941, chloroplast envelope;GO:0016021, integral component of membrane;GO:0031969, chloroplast membrane;GO:0042626, ATPase activity, coupled to transmembrane movement of substances;GO:0055085, transmembrane transport	-
TRINITY_DN96276_c1_g2	9465.8208285	1639.69783333	2.5292976379099996	0.000835354413032	0.047135466353400005	up	cd07816, Bet_v1-like, Ligand-binding bet_v_1 domain of major pollen allergen of white birch (Betula verrucosa), Bet v 1, and related proteins. This family includes the ligand binding domain of Bet v 1 (the major pollen allergen of white birch, Betula verrucosa) and related proteins. In addition to birch Bet v 1, this family includes other plant intracellular pathogenesis-related class 10 (PR-10) …	-	gi|18652047|gb|AAL76932.1|AF456481_1 major allergen isoform Dau c 1.0201 [Daucus carota] 3.4e-27	gi|6706003|emb|Z75662.2| Apium graveolens mRNA for Api g 1.0201 allergen 3.06223e-77	-	sp|P92918|ALL2_APIGR Major allergen Api g 1, isoallergen 2 OS=Apium graveolens PE=1 SV=1 2.41922e-35	tr|Q8SAE7|Q8SAE7_DAUCA Major allergen isoform Dau c 1.0201 OS=Daucus carota PE=2 SV=1 2.6e-27	GO:0006952, defense response;GO:0009607, response to biotic stimulus	-
TRINITY_DN73700_c0_g2	0.0001	12.565986733299999	-16.9391644365	1.0919773466e-06	0.00041383457361100003	down	-	-	gi|1021037841|gb|KZM95624.1| hypothetical protein DCAR_018866 [Daucus carota subsp. sativus] 9.6e-06	-	-	sp|P92939|ECA1_ARATH Calcium-transporting ATPase 1, endoplasmic reticulum-type OS=Arabidopsis thaliana GN=ECA1 PE=1 SV=2 3.73247e-06	-	GO:0005388, calcium-transporting ATPase activity;GO:0005524, ATP binding;GO:0005774, vacuolar membrane;GO:0005783, endoplasmic reticulum;GO:0005789, endoplasmic reticulum membrane;GO:0005886, plasma membrane;GO:0005887, integral component of plasma membrane;GO:0006816, calcium ion transport;GO:0010042, response to manganese ion;GO:0030176, integral component of endoplasmic reticulum membrane;GO:0…	-
TRINITY_DN73700_c0_g3	0.0001	6.16377283333	-15.9115260717	0.0005364260105	0.0355772230365	down	-	-	-	-	-	-	-	-	-
TRINITY_DN80887_c0_g1	5.91394	0.0001	15.851831986199999	3.72870411962e-17	1.8093951040899998e-13	up	-	-	-	-	-	-	-	-	-
TRINITY_DN89704_c2_g1	23.1763293	2.2811555	3.3448153887400003	0.000132018588691	0.0137606535399	up	-	-	gi|1021054282|gb|KZN12060.1| hypothetical protein DCAR_004716 [Daucus carota subsp. sativus] 3.5e-15	-	-	-	-	-	-
TRINITY_DN82421_c0_g2	0.439239983333	11.1193069475	-4.66191367265	7.97080091013e-05	0.0096163749599	down	pfam07058, MAP70, Microtubule-associated protein 70. This family represents a family of plant microtubule-associated proteins of size 70 kDa. The proteins contain four predicted coiled-coil domains, and truncation studies identify a central domain that targets the proteins to microtubules. It has no predicted trans-membrane domains, and the region between the coils from approximately residues 240…	-	gi|1021051803|gb|KZN09581.1| hypothetical protein DCAR_002237 [Daucus carota subsp. sativus] 4.0e-89	gi|702351148|ref|XM_010059507.1| PREDICTED: Eucalyptus grandis microtubule-associated protein 70-5 (LOC104445604), transcript variant X2, mRNA 2.25482e-98	pfam07058, MAP70, Microtubule-associated protein 70. This family represents a family of plant microtubule-associated proteins of size 70 kDa. The proteins contain four predicted coiled-coil domains, and truncation studies identify a central domain that targets the proteins to microtubules. It has no predicted trans-membrane domains, and the region between the coils from approximately residues 240…	sp|Q8GYX3|MP705_ARATH Microtubule-associated protein 70-5 OS=Arabidopsis thaliana GN=MAP70.5 PE=1 SV=1 2.5261e-87	tr|A0A061GHB8|A0A061GHB8_THECC Microtubule-associated proteins 70-5 isoform 1 OS=Theobroma cacao GN=TCM_030420 PE=4 SV=1 7.7e-77	GO:0005737, cytoplasm;GO:0005874, microtubule;GO:0007010, cytoskeleton organization;GO:0008017, microtubule binding;GO:0009832, plant-type cell wall biogenesis;GO:0010051, xylem and phloem pattern formation;GO:0071555, cell wall organization	-
TRINITY_DN81862_c1_g2	54.561744081499995	2.7471867138999997	4.3118628889099995	0.000493227541557	0.0339762981643	up	pfam03763, Remorin_C, Remorin, C-terminal region. Remorins are plant-specific plasma membrane-associated proteins. In tobacco remorin co-purifies with lipid rafts. Most remorins have a variable, proline-rich N-half and a more conserved C-half that is predicted to form coiled coils. Consistent with this, circular dichroism studies have demonstrated that much of the protein is alpha-helical. Remori…	-	gi|1021048300|gb|KZN06080.1| hypothetical protein DCAR_006917 [Daucus carota subsp. sativus] 7.4e-50	gi|743789288|ref|XM_011037629.1| PREDICTED: Populus euphratica remorin (LOC105133579), mRNA 1.88735e-33	pfam03763, Remorin_C, Remorin, C-terminal region. Remorins are plant-specific plasma membrane-associated proteins. In tobacco remorin co-purifies with lipid rafts. Most remorins have a variable, proline-rich N-half and a more conserved C-half that is predicted to form coiled coils. Consistent with this, circular dichroism studies have demonstrated that much of the protein is alpha-helical. Remori…	sp|Q9M2D8|Y3126_ARATH Uncharacterized protein At3g61260 OS=Arabidopsis thaliana GN=At3g61260 PE=1 SV=1 2.44944e-46	tr|D7UC61|D7UC61_VITVI Putative uncharacterized protein OS=Vitis vinifera GN=VIT_15s0046g03180 PE=4 SV=1 1.3e-41	GO:0005773, vacuole;GO:0005886, plasma membrane;GO:0009506, plasmodesma	-
TRINITY_DN81862_c1_g1	83.1213925	1.62323983333	5.67827174472	0.0003095752421559999	0.024876236133	up	-	-	-	-	-	-	-	-	-
TRINITY_DN77935_c0_g4	163.42778666700002	0.430573333333	8.56817861002	1.60925834164e-05	0.00300365890914	up	-	-	-	-	-	-	-	-	-
TRINITY_DN77935_c0_g1	869.58292694	3.43908471667	7.98215515017	1.17696512309e-06	0.00042984824649300004	up	-	KOG4744, KOG4744, KOG4744, Uncharacterized conserved protein [Function unknown]. 2.50835e-06	gi|10945667|gb|AAG24641.1|AF308736_1 Lea1P [Daucus carota] 8.0e-41	-	-	sp|P83442|LEAD3_DAUCA Late embryogenesis abundant protein Dc3 OS=Daucus carota PE=2 SV=1 4.87619e-55	tr|Q9FUG0|Q9FUG0_DAUCA Lea1P OS=Daucus carota PE=2 SV=1 6.1e-41	-	-
TRINITY_DN96939_c2_g4	0.102044833333	25.282385	-7.952785616919999	7.02735985316e-09	5.9594058358599995e-06	down	cd14664, STK_BAK1_like, Catalytic domain of the Serine/Threonine Kinase, BRI1 associated kinase 1 and related STKs. STKs catalyze the transfer of the gamma-phosphoryl group from ATP to serine/threonine residues on protein substrates. This subfamily includes three leucine-rich repeat receptor-like kinases (LRR-RLKs): Arabidopsis thaliana BAK1 and CLAVATA1 (CLV1), and Physcomitrella patens CLL1B cl…	KOG1187, KOG1187, KOG1187, Serine/threonine protein kinase [Signal transduction mechanisms]. 6.63578e-24	gi|747094408|ref|XP_011095036.1| PREDICTED: wall-associated receptor kinase 2-like [Sesamum indicum] 2.8e-40	gi|1025387950|ref|XM_016578929.1| PREDICTED: Nicotiana tabacum wall-associated receptor kinase 2-like (LOC107760828), mRNA 6.83075e-21	-	sp|Q9LMN6|WAK4_ARATH Wall-associated receptor kinase 4 OS=Arabidopsis thaliana GN=WAK4 PE=2 SV=1 1.25488e-32	tr|M1AUT2|M1AUT2_SOLTU Uncharacterized protein OS=Solanum tuberosum GN=PGSC0003DMG402011794 PE=3 SV=1 2.7e-40	GO:0004674, protein serine/threonine kinase activity;GO:0005509, calcium ion binding;GO:0005524, ATP binding;GO:0007166, cell surface receptor signaling pathway;GO:0009826, unidimensional cell growth;GO:0016021, integral component of membrane;GO:0030247, polysaccharide binding;GO:0048527, lateral root development	-
TRINITY_DN81847_c0_g1	0.050162933333300005	6.128668676669999	-6.93280818901	8.29943389587e-05	0.009916971990459999	down	PLN03007, PLN03007, UDP-glucosyltransferase family protein. 1.32223e-87	KOG1192, KOG1192, KOG1192, UDP-glucuronosyl and UDP-glucosyl transferase [Carbohydrate transport and metabolism, Energy production and conversion]. 1.4642e-19	gi|1021044677|gb|KZN02458.1| hypothetical protein DCAR_011212 [Daucus carota subsp. sativus] 1.4e-211	-	pfam00201, UDPGT, UDP-glucoronosyl and UDP-glucosyl transferase. 6.94454e-08	sp|Q9ZVX4|U90A1_ARATH UDP-glycosyltransferase 90A1 OS=Arabidopsis thaliana GN=UGT90A1 PE=2 SV=1 1.18275e-134	tr|I3VI27|I3VI27_BUPCH Glycosyltransferase OS=Bupleurum chinense PE=2 SV=1 1.8e-145	GO:0008152, metabolic process;GO:0008194, UDP-glycosyltransferase activity;GO:0009813, flavonoid biosynthetic process;GO:0016758, transferase activity, transferring hexosyl groups;GO:0043231, intracellular membrane-bounded organelle;GO:0052696, flavonoid glucuronidation	-
TRINITY_DN43759_c0_g1	0.0001	8.06294833333	-16.299019857	1.24132563313e-15	2.25887645994e-12	down	-	-	-	-	-	-	-	-	-
TRINITY_DN73439_c0_g2	2.400413	6.968158166669999	-1.53749472306	0.0005767996623559999	0.0373751632848	down	-	-	gi|1021039571|gb|KZM97352.1| hypothetical protein DCAR_015286 [Daucus carota subsp. sativus] 5.4e-66	-	-	-	-	-	-
TRINITY_DN95661_c0_g2	1.0756273133399998	10.384510797699999	-3.27118305392	5.22410170873e-05	0.007220088796720001	down	PLN02418, PLN02418, delta-1-pyrroline-5-carboxylate synthase. 7.37789e-21	KOG4165, KOG4165, KOG4165, Gamma-glutamyl phosphate reductase [Amino acid transport and metabolism]. 2.61873e-16	gi|703144881|ref|XP_010108393.1| Delta-1-pyrroline-5-carboxylate synthase [Morus notabilis] 4.8e-19	gi|147818976|emb|AM434968.2| Vitis vinifera contig VV78X229030.8, whole genome shotgun sequence 6.56535e-25	-	sp|Q96480|P5CS_SOLLC Delta-1-pyrroline-5-carboxylate synthase OS=Solanum lycopersicum GN=PRO2 PE=2 SV=1 7.06459e-18	tr|W9RZG1|W9RZG1_9ROSA Delta-1-pyrroline-5-carboxylate synthase OS=Morus notabilis GN=L484_010401 PE=3 SV=1 3.7e-19	GO:0004349, glutamate 5-kinase activity;GO:0004350, glutamate-5-semialdehyde dehydrogenase activity;GO:0005524, ATP binding;GO:0005737, cytoplasm;GO:0006561, proline biosynthetic process;GO:0055129, L-proline biosynthetic process	-
TRINITY_DN90150_c0_g4	0.299462883333	22.1207781667	-6.206881126980001	7.61349311667e-07	0.000307877677436	down	TIGR00898, organic_anion_transporter, cation transport protein. [Transport and binding proteins, Cations and iron carrying compounds]. 3.83198e-40	KOG0255, KOG0255, KOG0255, Synaptic vesicle transporter SVOP and related transporters (major facilitator superfamily) [General function prediction only]. 8.25904e-31	gi|643711477|gb|KDP25005.1| hypothetical protein JCGZ_23988 [Jatropha curcas] 5.3e-152	-	-	sp|Q9CAT6|OCT1_ARATH Organic cation/carnitine transporter 1 OS=Arabidopsis thaliana GN=OCT1 PE=2 SV=1 3.05206e-145	tr|A0A067JYB7|A0A067JYB7_JATCU Uncharacterized protein OS=Jatropha curcas GN=JCGZ_23988 PE=4 SV=1 4.1e-152	GO:0005524, ATP binding;GO:0005886, plasma membrane;GO:0010150, leaf senescence;GO:0015226, carnitine transmembrane transporter activity;GO:0015839, cadaverine transport;GO:0016021, integral component of membrane;GO:0022857, transmembrane transporter activity	-
TRINITY_DN92806_c0_g6	0.0001	13.539182166700002	-17.0467810701	2.65526170195e-06	0.000776123788896	down	-	-	gi|971584688|ref|XP_006366340.2| PREDICTED: wall-associated receptor kinase 2-like [Solanum tuberosum] 5.1e-15	-	-	sp|Q9S9M5|WAKLA_ARATH Wall-associated receptor kinase-like 1 OS=Arabidopsis thaliana GN=WAKL1 PE=2 SV=1 1.48973e-15	tr|M1AFS7|M1AFS7_SOLTU Uncharacterized protein OS=Solanum tuberosum GN=PGSC0003DMG401008483 PE=3 SV=1 3.9e-15	GO:0004674, protein serine/threonine kinase activity;GO:0005509, calcium ion binding;GO:0005524, ATP binding;GO:0005886, plasma membrane;GO:0007166, cell surface receptor signaling pathway;GO:0016021, integral component of membrane;GO:0030247, polysaccharide binding	-
TRINITY_DN82402_c3_g1	0.0001	11.500616	-16.8113516118	4.27076309712e-19	2.48692229496e-15	down	-	-	-	-	-	-	-	-	-
TRINITY_DN67901_c1_g1	1.44771525	7.975619998169999	-2.4618188058099997	0.000894135658957	0.0496819767194	down	TIGR00957, Multidrug_resistance-associated_protein_1, multi drug resistance-associated protein (MRP). This model describes multi drug resistance-associated protein (MRP) in eukaryotes. The multidrug resistance-associated protein is an integral membrane protein that causes multidrug resistance when overexpressed in mammalian cells. It belongs to ABC transporter superfamily. The protein topology an…	KOG0054, KOG0054, KOG0054, Multidrug resistance-associated protein/mitoxantrone resistance protein, ABC superfamily [Secondary metabolites biosynthesis, transport and catabolism]. 7.78624e-115	gi|1021053171|gb|KZN10949.1| hypothetical protein DCAR_003605 [Daucus carota subsp. sativus] 5.1e-196	gi|731335308|ref|XM_010680359.1| PREDICTED: Beta vulgaris subsp. vulgaris ABC transporter C family member 3-like (LOC104894183), mRNA 0.0	pfam00005, ABC_tran, ABC transporter. ABC transporters for a large family of proteins responsible for translocation of a variety of compounds across biological membranes. ABC transporters are the largest family of proteins in many completely sequenced bacteria. ABC transporters are composed of two copies of this domain and two copies of a transmembrane domain pfam00664. These four domains may bel…	sp|Q9LK64|AB3C_ARATH ABC transporter C family member 3 OS=Arabidopsis thaliana GN=ABCC3 PE=1 SV=1 0.0	tr|A0A0K9R6E7|A0A0K9R6E7_SPIOL Uncharacterized protein OS=Spinacia oleracea GN=SOVF_101510 PE=4 SV=1 1.1e-193	GO:0000325, plant-type vacuole;GO:0005524, ATP binding;GO:0005773, vacuole;GO:0005774, vacuolar membrane;GO:0008559, xenobiotic transmembrane transporting ATPase activity;GO:0009506, plasmodesma;GO:0010290, chlorophyll catabolite transmembrane transporter activity;GO:0015431, glutathione S-conjugate-exporting ATPase activity;GO:0016021, integral component of membrane;GO:0042626, ATPase activity, …	-
TRINITY_DN56435_c0_g1	17.5566525833	0.0001	17.4216582759	2.4350951044e-31	1.0634912604200001e-26	up	-	-	gi|1021026843|gb|KZM84630.1| hypothetical protein DCAR_027948 [Daucus carota subsp. sativus] 1.1e-22	-	-	-	-	-	-
TRINITY_DN79438_c2_g1	15.8318209167	0.186728175	6.405743759119999	6.4831972924e-07	0.000270951116698	up	pfam02704, GASA, Gibberellin regulated protein. This is the GASA gibberellin regulated cysteine rich protein family. The expression of these proteins is up-regulated by the plant hormone gibberellin, most of these proteins have some role in plant development. There are 12 cysteine residues conserved within the alignment giving the potential for these proteins to posses 6 disulphide bonds. 8.94193…	-	gi|1021044662|gb|KZN02443.1| hypothetical protein DCAR_011197 [Daucus carota subsp. sativus] 1.6e-34	gi|747077366|ref|XM_011087500.1| PREDICTED: Sesamum indicum gibberellin-regulated protein 14-like (LOC105167696), mRNA 4.58106e-16	pfam02704, GASA, Gibberellin regulated protein. This is the GASA gibberellin regulated cysteine rich protein family. The expression of these proteins is up-regulated by the plant hormone gibberellin, most of these proteins have some role in plant development. There are 12 cysteine residues conserved within the alignment giving the potential for these proteins to posses 6 disulphide bonds. 2.1363e…	sp|Q9LFR3|GASAE_ARATH Gibberellin-regulated protein 14 OS=Arabidopsis thaliana GN=GASA14 PE=1 SV=1 2.71178e-21	tr|A0A068U0W6|A0A068U0W6_COFCA Uncharacterized protein OS=Coffea canephora GN=GSCOC_T00039454001 PE=4 SV=1 3.2e-30	GO:0005576, extracellular region;GO:0005886, plasma membrane;GO:0009651, response to salt stress;GO:0009737, response to abscisic acid;GO:0009739, response to gibberellin;GO:0009740, gibberellic acid mediated signaling pathway;GO:2000377, regulation of reactive oxygen species metabolic process	-
TRINITY_DN92444_c0_g1	13.109368333299999	0.00239715	12.416990364	1.76514575576e-09	1.7131131814299999e-06	up	cd00266, MADS_SRF_like, SRF-like/Type I subfamily of MADS (MCM1, Agamous, Deficiens, and SRF (serum response factor) box family of eukaryotic transcriptional regulators. Binds DNA and exists as hetero- and homo-dimers. Differs from the MEF-like/Type II subgroup mainly in position of the alpha 2 helix responsible for the dimerization interface. Important in homeotic regulation in plants and in imm…	KOG0014, KOG0014, KOG0014, MADS box transcription factor [Transcription]. 1.60979e-07	gi|1021036599|gb|KZM94382.1| hypothetical protein DCAR_017625 [Daucus carota subsp. sativus] 3.6e-107	gi|206114256|gb|FJ168510.1| Petunia x hybrida type I MADS box transcription factor (MADSy5) gene, complete cds 3.47473e-85	-	sp|Q9FJK3|AGL80_ARATH Agamous-like MADS-box protein AGL80 OS=Arabidopsis thaliana GN=AGL80 PE=1 SV=1 7.39089e-60	tr|A0A068V5P9|A0A068V5P9_COFCA Uncharacterized protein OS=Coffea canephora GN=GSCOC_T00042778001 PE=4 SV=1 1.7e-72	GO:0003677, DNA binding;GO:0003700, DNA binding transcription factor activity;GO:0005634, nucleus;GO:0006351, transcription, DNA-templated;GO:0006355, regulation of transcription, DNA-templated;GO:0043078, polar nucleus	-
TRINITY_DN79322_c0_g1	1.1965262422	10.54359222	-3.1394425358999998	6.54182342011e-05	0.00837842595713	down	pfam07526, POX, Associated with HOX. The function of this domain is unknown. It is often found in plant proteins associated with pfam00046. 1.18514e-14	KOG0773, KOG0773, KOG0773, Transcription factor MEIS1 and related HOX domain proteins [Transcription]. 4.16506e-11	gi|1021043428|gb|KZN01209.1| hypothetical protein DCAR_009963 [Daucus carota subsp. sativus] 2.1e-60	gi|731429684|ref|XM_002280997.3| PREDICTED: Vitis vinifera BEL1-like homeodomain protein 11 (LOC100252354), transcript variant X1, mRNA 5.626e-21	pfam07526, POX, Associated with HOX. The function of this domain is unknown. It is often found in plant proteins associated with pfam00046. 2.8314e-15	sp|Q1PFD1|BLH11_ARATH BEL1-like homeodomain protein 11 OS=Arabidopsis thaliana GN=BLH11 PE=2 SV=1 6.49612e-43	tr|A0A068UG59|A0A068UG59_COFCA Uncharacterized protein OS=Coffea canephora GN=GSCOC_T00024743001 PE=4 SV=1 1.1e-43	GO:0003677, DNA binding;GO:0003700, DNA binding transcription factor activity;GO:0005634, nucleus;GO:0006351, transcription, DNA-templated;GO:0006355, regulation of transcription, DNA-templated	-
TRINITY_DN73717_c1_g2	0.485858333333	16.520159	-5.0875480481199995	6.5307164512e-07	0.000271637376125	down	PLN02160, PLN02160, thiosulfate sulfurtransferase. 1.30508e-38	KOG1530, KOG1530, KOG1530, Rhodanese-related sulfurtransferase [Inorganic ion transport and metabolism]. 2.15368e-21	gi|1021035569|gb|KZM93352.1| hypothetical protein DCAR_016597 [Daucus carota subsp. sativus] 4.5e-57	-	-	sp|Q9FKW8|STR18_ARATH Thiosulfate sulfurtransferase 18 OS=Arabidopsis thaliana GN=STR18 PE=1 SV=1 5.78187e-38	tr|A0A0V0GXX6|A0A0V0GXX6_SOLCH Putative thiosulfate sulfurtransferase 18-like OS=Solanum chacoense PE=4 SV=1 1.9e-36	GO:0004792, thiosulfate sulfurtransferase activity;GO:0005737, cytoplasm;GO:0016740, transferase activity	-
TRINITY_DN72459_c0_g3	1.0458640664	30.8665349167	-4.88327627665	0.00041313843147500006	0.0305558023489	down	pfam04819, DUF716, Family of unknown function (DUF716). This family is equally distributed in both metazoa and plants. Annotation associated with an mRNA from Nicotiana tabacum suggest that it may be involved in response to viral attack in plants. However, no clear function has been assigned to this family. 9.07538e-20	-	gi|1021023608|gb|KZM81396.1| hypothetical protein DCAR_029009 [Daucus carota subsp. sativus] 2.4e-121	-	pfam04819, DUF716, Family of unknown function (DUF716). This family is equally distributed in both metazoa and plants. Annotation associated with an mRNA from Nicotiana tabacum suggest that it may be involved in response to viral attack in plants. However, no clear function has been assigned to this family. 2.16818e-20	sp|O49396|C82C3_ARATH Cytochrome P450 82C3 OS=Arabidopsis thaliana GN=CYP82C3 PE=2 SV=3 3.61337e-23	tr|A0A061DX12|A0A061DX12_THECC Family of Uncharacterized protein function OS=Theobroma cacao GN=TCM_006285 PE=4 SV=1 7.5e-83	GO:0005506, iron ion binding;GO:0016020, membrane;GO:0016021, integral component of membrane;GO:0016709, oxidoreductase activity, acting on paired donors, with incorporation or reduction of molecular oxygen, NAD(P)H as one donor, and incorporation of one atom of oxygen;GO:0020037, heme binding;GO:0044550, secondary metabolite biosynthetic process	-
TRINITY_DN95550_c2_g3	21.2336656167	0.04349138333330001	8.93140813575	1.0258479305e-08	8.45327728163e-06	up	-	-	-	-	-	-	-	-	-
TRINITY_DN72261_c1_g1	162.80112965	1.53213308333	6.731425282719999	3.23586622631e-06	0.0009001376027680001	up	-	-	-	-	-	-	-	-	-
TRINITY_DN93179_c0_g3	5.70594233333	0.0807709833333	6.142484252899999	4.12861189981e-06	0.00107970617848	up	PLN02667, PLN02667, inositol polyphosphate multikinase. 6.0004e-13	-	gi|1021035298|gb|KZM93081.1| hypothetical protein DCAR_016326 [Daucus carota subsp. sativus] 6.9e-17	-	-	sp|Q9FLT2|IPMKB_ARATH Inositol polyphosphate multikinase beta OS=Arabidopsis thaliana GN=IPK2b PE=1 SV=1 6.05764e-10	tr|A0A0V0I453|A0A0V0I453_SOLCH Putative inositol polyphosphate multikinase beta-like OS=Solanum chacoense PE=4 SV=1 8.7e-12	GO:0000823, inositol-1,4,5-trisphosphate 6-kinase activity;GO:0000824, inositol tetrakisphosphate 3-kinase activity;GO:0005524, ATP binding;GO:0005634, nucleus;GO:0006355, regulation of transcription, DNA-templated;GO:0008440, inositol-1,4,5-trisphosphate 3-kinase activity;GO:0009555, pollen development;GO:0009793, embryo development ending in seed dormancy;GO:0010183, pollen tube guidance;GO:001…	K00915-ko04070 Phosphatidylinositol signaling system;ko00562 Inositol phosphate metabolism
TRINITY_DN69722_c2_g3	0.101348333333	7.789801666669999	-6.26419232773	5.204776496019999e-06	0.0012989188931400001	down	-	-	-	gi|628066044|ref|XM_007699824.1| Cochliobolus sativus ND90Pr hypothetical protein partial mRNA 1.17357e-17	-	-	-	-	-
TRINITY_DN91665_c0_g1	0.031187	7.92957016667	-7.99015407366	0.00016874627754499998	0.0167303985298	down	-	-	-	gi|697191366|ref|XR_687007.1| PREDICTED: Nicotiana tomentosiformis uncharacterized LOC104099455 (LOC104099455), ncRNA 1.22977e-26	-	-	-	-	-
TRINITY_DN77323_c1_g2	0.6396931666669999	5.20122606667	-3.02339976746	2.65677141608e-06	0.000776123788896	down	PTZ00106, PTZ00106, 60S ribosomal protein L30; Provisional. 3.11529e-22	KOG2988, KOG2988, KOG2988, 60S ribosomal protein L30 [Translation, ribosomal structure and biogenesis]. 2.72808e-24	gi|971519403|dbj|GAQ78827.1| 60S ribosomal protein L30 [Klebsormidium flaccidum] 8.6e-18	gi|702073508|emb|FO905882.1| Leptosphaeria biglobosa Thlaspii ibcn65_scaffold00019 complete sequence 1.07304e-116	-	sp|P52808|RL30A_SCHPO 60S ribosomal protein L30-1 OS=Schizosaccharomyces pombe (strain 972 / ATCC 24843) GN=rpl3001 PE=3 SV=2 9.99071e-25	tr|A0A0D6QRU5|A0A0D6QRU5_ARACU Uncharacterized protein OS=Araucaria cunninghamii PE=3 SV=1 8.2e-21	GO:0002181, cytoplasmic translation;GO:0003723, RNA binding;GO:0003735, structural constituent of ribosome;GO:0005829, cytosol;GO:0005840, ribosome;GO:0006364, rRNA processing;GO:0006412, translation;GO:0022625, cytosolic large ribosomal subunit	-
TRINITY_DN87712_c1_g4	25.7140273333	2.6149932000000002	3.29767648288	0.000396410849715	0.0296449473374	up	-	-	-	gi|61675751|gb|AC127020.16| Medicago truncatula chromosome 6 clone mth2-9p1, complete sequence 3.83636e-26	-	-	-	-	-
TRINITY_DN96502_c0_g6	5.453486666669999	100.17755333299999	-4.1992365648900005	9.38618643106e-05	0.010842504898700001	down	-	-	-	-	-	-	-	-	-
TRINITY_DN96502_c0_g4	5.59915235	63.2933710212	-3.49877406742	0.0003551949236919999	0.0274316631297	down	pfam03124, EXS, EXS family. We have named this region the EXS family after (ERD1, XPR1, and SYG1). This family includes C-terminus portions from the SYG1 G-protein associated signal transduction protein from Saccharomyces cerevisiae, and sequences that are thought to be murine leukaemia virus (MLV) receptors (XPR1). N-terminus portions from these proteins are aligned in the SPX pfam03105 family. …	KOG1162, KOG1162, KOG1162, Predicted small molecule transporter [Intracellular trafficking, secretion, and vesicular transport]. 8.06811e-41	gi|1021029361|gb|KZM87146.1| hypothetical protein DCAR_024280 [Daucus carota subsp. sativus] 1.0e-86	gi|1000947290|ref|XM_002528776.2| PREDICTED: Ricinus communis phosphate transporter PHO1 (LOC8263748), mRNA 8.34232e-70	pfam03124, EXS, EXS family. We have named this region the EXS family after (ERD1, XPR1, and SYG1). This family includes C-terminus portions from the SYG1 G-protein associated signal transduction protein from Saccharomyces cerevisiae, and sequences that are thought to be murine leukaemia virus (MLV) receptors (XPR1). N-terminus portions from these proteins are aligned in the SPX pfam03105 family. …	sp|Q8S403|PHO1_ARATH Phosphate transporter PHO1 OS=Arabidopsis thaliana GN=PHO1 PE=1 SV=1 3.41207e-99	tr|A0A068TTB0|A0A068TTB0_COFCA Uncharacterized protein OS=Coffea canephora GN=GSCOC_T00026350001 PE=4 SV=1 2.7e-79	GO:0005794, Golgi apparatus;GO:0005802, trans-Golgi network;GO:0005886, plasma membrane;GO:0015114, phosphate ion transmembrane transporter activity;GO:0016021, integral component of membrane;GO:0016036, cellular response to phosphate starvation	-
TRINITY_DN85081_c0_g1	9.51000666667	0.2108585	5.4950992674900005	0.000642929373442	0.040141495341	up	-	-	-	-	-	-	-	-	-
TRINITY_DN77520_c1_g1	7.616078333330001	0.0001	16.2167606968	2.76728295654e-05	0.0045180161571	up	-	-	-	-	-	-	-	-	-
TRINITY_DN91821_c1_g2	32.68782185	1.77444535	4.2033131989	0.000190708272612	0.0181457467188	up	pfam12166, Piezo_RRas_bdg, Piezo non-specific cation channel, R-Ras-binding domain. This is an extracellular domain at the C-terminus of Piezo, or FAM38 mechanosensitive non-specific cation channel proteins. It seems likely that this region of the Piezo proteins may be responsible for R-Ras recruitment because this region is capable of relocalizing R-Ras to the ER in eukaryotes. 5.48364e-06	-	gi|1024007623|gb|KZV32394.1| hypothetical protein F511_03677 [Dorcoceras hygrometricum] 4.0e-19	gi|769804508|ref|XM_011627535.1| PREDICTED: Amborella trichopoda piezo-type mechanosensitive ion channel homolog (LOC18440663), mRNA 6.76681e-22	pfam12166, Piezo_RRas_bdg, Piezo non-specific cation channel, R-Ras-binding domain. This is an extracellular domain at the C-terminus of Piezo, or FAM38 mechanosensitive non-specific cation channel proteins. It seems likely that this region of the Piezo proteins may be responsible for R-Ras recruitment because this region is capable of relocalizing R-Ras to the ER in eukaryotes. 1.31009e-06	sp|F4IN58|PIEZO_ARATH Piezo-type mechanosensitive ion channel homolog OS=Arabidopsis thaliana GN=At2g48040/At2g48050/At2g48060 PE=2 SV=1 1.23372e-20	tr|A5BIX1|A5BIX1_VITVI Putative uncharacterized protein OS=Vitis vinifera GN=VITISV_031828 PE=4 SV=1 2.5e-18	GO:0008381, mechanosensitive ion channel activity;GO:0016021, integral component of membrane	-
TRINITY_DN69220_c0_g3	17.5763828333	0.442099166667	5.31312437362	0.00030912395237700003	0.0248708664818	up	-	-	gi|1021050941|gb|KZN08719.1| hypothetical protein DCAR_001375 [Daucus carota subsp. sativus] 3.6e-09	-	-	-	-	-	-
TRINITY_DN69220_c0_g1	63.1016971667	1.6412831	5.26478279651	3.03491472292e-05	0.00484626501467	up	-	-	-	-	-	-	-	-	-
TRINITY_DN94622_c0_g2	2.91802496667	40.906897	-3.80927997334	7.16947688762e-05	0.00888272762699	down	cd14702, bZIP_plant_GBF1, Basic leucine zipper (bZIP) domain of Plant G-box binding factor 1 (GBF1)-like transcription factors: a DNA-binding and dimerization domain. This subfamily is composed of plant bZIP transciption factors including Arabidopsis thaliana G-box binding factor 1 (GBF1), Zea mays Opaque-2 and Ocs element-binding factor 1 (OCSBF-1), Triticum aestivum Histone-specific transcripti…	-	gi|1021024711|gb|KZM82499.1| hypothetical protein DCAR_030068 [Daucus carota subsp. sativus] 5.6e-68	gi|351721339|ref|NM_001250021.1| Glycine max bZIP transcription factor bZIP35 (BZIP35), mRNA ;gi|113367165|gb|DQ787030.1| Glycine max bZIP transcription factor bZIP35 (bZIP35) mRNA, complete cds 8.26152e-17	-	sp|Q9FMC2|BZP43_ARATH Basic leucine zipper 43 OS=Arabidopsis thaliana GN=BZIP43 PE=1 SV=1 7.76836e-27	tr|A0A068TW22|A0A068TW22_COFCA Uncharacterized protein OS=Coffea canephora GN=GSCOC_T00032465001 PE=4 SV=1 7.3e-44	GO:0003700, DNA binding transcription factor activity;GO:0005634, nucleus;GO:0006351, transcription, DNA-templated;GO:0043565, sequence-specific DNA binding	-
TRINITY_DN76308_c0_g1	18.324647366700002	55.8198371667	-1.60699248	0.0007684347541230001	0.0447317063421	down	pfam05699, Dimer_Tnp_hAT, hAT family C-terminal dimerization region. This dimerization region is found at the C terminus of the transposases of elements belonging to the Activator superfamily (hAT element superfamily). The isolated dimerization region forms extremely stable dimers in vitro. 2.46826e-07	-	gi|828310986|ref|XP_012571185.1| PREDICTED: uncharacterized protein LOC105852116 [Cicer arietinum] 1.8e-101	-	pfam05699, Dimer_Tnp_hAT, hAT family C-terminal dimerization region. This dimerization region is found at the C terminus of the transposases of elements belonging to the Activator superfamily (hAT element superfamily). The isolated dimerization region forms extremely stable dimers in vitro. 5.89689e-08	-	tr|A0A0K9QKB5|A0A0K9QKB5_SPIOL Uncharacterized protein OS=Spinacia oleracea GN=SOVF_169680 PE=4 SV=1 2.3e-101	GO:0003676, nucleic acid binding	-
TRINITY_DN93417_c1_g3	7.36546015	0.360440316667	4.35294336265	0.000178652947319	0.0173222362083	up	-	-	-	-	-	-	-	-	-
TRINITY_DN88180_c1_g1	9.302738259969999	0.807434003513	3.5262391863499998	0.00047940293442400007	0.033286492935700004	up	pfam10294, Methyltransf_16, Lysine methyltransferase. Methyltrans_16 is a lysine methyltransferase. characterized members of this family are protein methyltransferases targetting Lys residues in specific proteins, including calmodulin, VCP, Kin17 and Hsp70 proteins. 3.63739e-11	KOG2063, KOG2063, KOG2063, Vacuolar assembly/sorting proteins VPS39/VAM6/VPS3 [Intracellular trafficking, secretion, and vesicular transport]. 1.17088e-21	gi|1021031083|gb|KZM88868.1| hypothetical protein DCAR_025943 [Daucus carota subsp. sativus] 3.7e-141	gi|848866897|ref|XM_012978657.1| PREDICTED: Erythranthe guttatus vam6/Vps39-like protein (LOC105954969), mRNA 5.73127e-127	pfam10294, Methyltransf_16, Lysine methyltransferase. Methyltrans_16 is a lysine methyltransferase. characterized members of this family are protein methyltransferases targetting Lys residues in specific proteins, including calmodulin, VCP, Kin17 and Hsp70 proteins. 8.69004e-12	sp|Q28IN4|MT21B_XENTR Protein-lysine methyltransferase METTL21B OS=Xenopus tropicalis GN=mettl21b PE=2 SV=1 1.79017e-12	tr|A0A022RMG2|A0A022RMG2_ERYGU Uncharacterized protein OS=Erythranthe guttata GN=MIMGU_mgv1a000716mg PE=4 SV=1 4.1e-116	GO:0005622, intracellular;GO:0005737, cytoplasm;GO:0006886, intracellular protein transport;GO:0008168, methyltransferase activity;GO:0016192, vesicle-mediated transport;GO:0030897, HOPS complex;GO:0097576, vacuole fusion	-
TRINITY_DN67300_c4_g1	0.0968765833333	5.0593880666699995	-5.706671106569999	3.32823789317e-05	0.00516361625675	down	PTZ00141, PTZ00141, elongation factor 1- alpha; Provisional. 1.33412e-83	KOG0052, KOG0052, KOG0052, Translation elongation factor EF-1 alpha/Tu [Translation, ribosomal structure and biogenesis]. 2.68579e-83	gi|326492680|dbj|BAJ90196.1| predicted protein [Hordeum vulgare subsp. vulgare] 2.8e-65	gi|470450828|ref|XM_004340382.1| Acanthamoeba castellanii str. Neff elongation factor 1alpha, somatic form, putative (ACA1_138040) mRNA, partial cds 3.30802e-116	pfam03143, GTP_EFTU_D3, Elongation factor Tu C-terminal domain. Elongation factor Tu consists of three structural domains, this is the third domain. This domain adopts a beta barrel structure. This the third domain is involved in binding to both charged tRNA and binding to EF-Ts pfam00889. 9.79381e-14	sp|Q92005|EF1A_DANRE Elongation factor 1-alpha OS=Danio rerio GN=eef1a PE=2 SV=1 4.96643e-89	tr|A0A0D6QSX4|A0A0D6QSX4_ARACU Elongation factor 1-alpha OS=Araucaria cunninghamii PE=3 SV=1 7.8e-68	GO:0003746, translation elongation factor activity;GO:0003924, GTPase activity;GO:0005525, GTP binding;GO:0005622, intracellular;GO:0005737, cytoplasm	-
TRINITY_DN72325_c2_g3	1.0194523333299998	6.23576485	-2.61277220454	0.000482178905381	0.033350382248299996	down	PTZ00018, PTZ00018, histone H3; Provisional. 6.49984e-68	KOG1745, KOG1745, KOG1745, Histones H3 and H4 [Chromatin structure and dynamics]. 7.31417e-65	gi|60543046|dbj|BAD90772.1| histone 3 [Conocephalum supradecompositum] 3.5e-51	gi|915693180|ref|XM_013488114.1| Aureobasidium subglaciale EXF-2481 hypothetical protein partial mRNA 4.74451e-154	pfam00125, Histone, Core histone H2A/H2B/H3/H4. 4.28665e-39	sp|Q0UY45|H3_PHANO Histone H3 OS=Phaeosphaeria nodorum (strain SN15 / ATCC MYA-4574 / FGSC 10173) GN=HHT1 PE=3 SV=1 5.75447e-74	tr|A0A0D6QRC7|A0A0D6QRC7_ARACU Histone H3 OS=Araucaria cunninghamii PE=3 SV=1 1.2e-51	GO:0000786, nucleosome;GO:0003677, DNA binding;GO:0005634, nucleus	-
TRINITY_DN78927_c1_g2	29.5743066667	3.738407154	2.9838487385000003	0.0004058430939800001	0.030220952028900003	up	pfam03634, TCP, TCP family transcription factor. This is a family of TCP plant transcription factors. TCP proteins were named after the first characterized members (TB1, CYC and PCFs) and they are involved in multiple developmental control pathways. This region contains a DNA binding basic-Helix-Loop-Helix (bHLP) structure. 8.00469e-14	-	gi|1021033327|gb|KZM91111.1| hypothetical protein DCAR_021524 [Daucus carota subsp. sativus] 7.8e-129	gi|971578930|ref|XM_006363158.2| PREDICTED: Solanum tuberosum transcription factor TCP15-like (LOC102585454), mRNA 3.78791e-49	pfam03634, TCP, TCP family transcription factor. This is a family of TCP plant transcription factors. TCP proteins were named after the first characterized members (TB1, CYC and PCFs) and they are involved in multiple developmental control pathways. This region contains a DNA binding basic-Helix-Loop-Helix (bHLP) structure. 1.91239e-14	sp|Q9C9L2|TCP15_ARATH Transcription factor TCP15 OS=Arabidopsis thaliana GN=TCP15 PE=1 SV=1 1.92304e-56	tr|F6GT89|F6GT89_VITVI Putative uncharacterized protein OS=Vitis vinifera GN=VIT_17s0000g06020 PE=4 SV=1 5.0e-104	GO:0003677, DNA binding;GO:0003700, DNA binding transcription factor activity;GO:0005634, nucleus;GO:0006351, transcription, DNA-templated;GO:0006355, regulation of transcription, DNA-templated;GO:0007623, circadian rhythm;GO:0008283, cell proliferation;GO:0009735, response to cytokinin;GO:0010229, inflorescence development;GO:0010252, auxin homeostasis;GO:0031540, regulation of anthocyanin biosy…	-
TRINITY_DN97632_c3_g5	29.0854865	2.24883366667	3.69305057339	0.00041542554708599996	0.0306730137458	up	-	KOG1893, KOG1893, KOG1893, Uncharacterized conserved protein [Function unknown]. 1.64264e-08	gi|1021037356|gb|KZM95139.1| hypothetical protein DCAR_018381 [Daucus carota subsp. sativus] 1.7e-24	-	-	sp|F4IN58|PIEZO_ARATH Piezo-type mechanosensitive ion channel homolog OS=Arabidopsis thaliana GN=At2g48040/At2g48050/At2g48060 PE=2 SV=1 7.71687e-26	tr|A0A061DQ76|A0A061DQ76_THECC Uncharacterized protein isoform 1 OS=Theobroma cacao GN=TCM_004478 PE=4 SV=1 3.2e-23	GO:0008381, mechanosensitive ion channel activity;GO:0016021, integral component of membrane	-
TRINITY_DN97632_c3_g1	8.823247771830001	0.2511027	5.13496035236	1.19733937192e-05	0.00243218609579	up	-	-	gi|703076464|ref|XP_010090341.1| hypothetical protein L484_025006 [Morus notabilis] 0.0e+00	gi|802794184|ref|XM_012236922.1| PREDICTED: Jatropha curcas piezo-type mechanosensitive ion channel homolog (LOC105650049), mRNA 0.0	-	sp|F4IN58|PIEZO_ARATH Piezo-type mechanosensitive ion channel homolog OS=Arabidopsis thaliana GN=At2g48040/At2g48050/At2g48060 PE=2 SV=1 0.0	tr|W9R6X6|W9R6X6_9ROSA Uncharacterized protein OS=Morus notabilis GN=L484_025006 PE=4 SV=1 0.0e+00	GO:0008381, mechanosensitive ion channel activity;GO:0016021, integral component of membrane	-
TRINITY_DN85188_c0_g1	0.360261	6.1003986	-4.08178912484	0.0007163902337889999	0.0429180643009	down	-	-	-	-	-	-	-	-	-
TRINITY_DN65241_c0_g2	70.5614381667	1.34553908333	5.71262376378	9.70982370653e-05	0.0110865878601	up	-	-	gi|1021053627|gb|KZN11405.1| hypothetical protein DCAR_004061 [Daucus carota subsp. sativus] 1.0e-25	-	-	-	-	-	-
TRINITY_DN77641_c1_g1	0.464381355	13.570274816700001	-4.86899607849	0.000302588837929	0.0244956765905	down	PRK15347, PRK15347, two component system sensor kinase SsrA; Provisional. 1.56978e-09	KOG0519, KOG0519, KOG0519, Sensory transduction histidine kinase [Signal transduction mechanisms]. 5.94301e-08	gi|1021034083|gb|KZM91867.1| hypothetical protein DCAR_020768 [Daucus carota subsp. sativus] 3.0e-14	-	pfam00072, Response_reg, Response regulator receiver domain. This domain receives the signal from the sensor partner in bacterial two-component systems. It is usually found N-terminal to a DNA binding effector domain. 9.76535e-08	sp|Q75KW7|ORR41_ORYSJ Two-component response regulator ORR41 OS=Oryza sativa subsp. japonica GN=RR41 PE=3 SV=1 1.88578e-11	tr|B9S7Q7|B9S7Q7_RICCO Sensory transduction histidine kinase bacterial, putative OS=Ricinus communis GN=RCOM_0611000 PE=4 SV=1 5.7e-13	GO:0000160, phosphorelay signal transduction system;GO:0005622, intracellular;GO:0009736, cytokinin-activated signaling pathway;GO:0016301, kinase activity	-
TRINITY_DN93357_c0_g2	11.193613666700001	4.35297533333	1.3626021108700002	0.000541366215709	0.0357690732553	up	TIGR00322, diphthamide_biosynthesis_protein_predicted, diphthamide biosynthesis enzyme Dph1/Dph2 domain. Archaea and Eukaryotes, but not Eubacteria, share the property of having a covalently modified residue, 2'-[3-carboxamido-3-(trimethylammonio)propyl]histidine, as a part of a cytosolic protein. The modified His, termed diphthamide, is part of translation elongation factor EF-2 and is the site …	KOG2648, KOG2648, KOG2648, Diphthamide biosynthesis protein [Translation, ribosomal structure and biogenesis]. 1.79162e-47	gi|1021054154|gb|KZN11932.1| hypothetical protein DCAR_004588 [Daucus carota subsp. sativus] 2.9e-92	gi|593787987|ref|XM_007156971.1| Phaseolus vulgaris hypothetical protein (PHAVU_002G038000g) mRNA, complete cds 2.41802e-43	pfam01866, Diphthamide_syn, Putative diphthamide synthesis protein. Diphthamide_syn, diphthamide synthase, catalyzes the last amidation step of diphthamide biosynthesis using ammonium and ATP. DPH1 is a candidate tumour suppressor gene. DPH2 from yeast, which confers resistance to diphtheria toxin has been found to be involved in diphthamide synthesis. Diphtheria toxin inhibits eukaryotic protein…	sp|Q59MG1|DPH1_CANAL Diphthamide biosynthesis protein 1 OS=Candida albicans (strain SC5314 / ATCC MYA-2876) GN=DPH1 PE=3 SV=2 6.48416e-58	tr|A0A124SBT3|A0A124SBT3_CYNCS Diphthamide synthesis, DPH1/DPH2 OS=Cynara cardunculus var. scolymus GN=Ccrd_006316 PE=3 SV=1 1.2e-64	GO:0005737, cytoplasm;GO:0017183, peptidyl-diphthamide biosynthetic process from peptidyl-histidine	-
TRINITY_DN89710_c2_g4	0.34271599999999997	5.207836	-3.9255985652599996	0.000210845451642	0.0195922528347	down	-	-	gi|1021025180|gb|KZM82968.1| hypothetical protein DCAR_030537 [Daucus carota subsp. sativus] 1.4e-15	-	-	-	tr|A0A061EJ24|A0A061EJ24_THECC Gamete expressed protein 1, putative OS=Theobroma cacao GN=TCM_016799 PE=4 SV=1 8.7e-10	GO:0016021, integral component of membrane	-
TRINITY_DN77954_c3_g1	18.8069511667	74.4925691	-1.9858305291900002	8.98856015607e-05	0.010538574012799999	down	PTZ00281, PTZ00281, actin; Provisional. 1.94069e-23	KOG0676, KOG0676, KOG0676, Actin and related proteins [Cytoskeleton]. 2.84587e-21	gi|1026103129|ref|XP_016550628.1| PREDICTED: actin-7-like [Capsicum annuum] 1.2e-19	gi|1013854167|gb|KU234487.1| Apium graveolens actin mRNA, complete cds 4.11917e-56	pfam00022, Actin, Actin. 7.7071e-16	sp|Q25381|ACTM_LYTPI Actin, muscle (Fragment) OS=Lytechinus pictus PE=3 SV=1 1.13446e-23	tr|B2LW61|B2LW61_BETPL Actin OS=Betula platyphylla PE=2 SV=1 8.9e-20	GO:0005524, ATP binding;GO:0005737, cytoplasm;GO:0005856, cytoskeleton	-
TRINITY_DN72521_c0_g1	18.6147604167	0.216831983333	6.423725663709999	1.36796372079e-05	0.0026730990407200002	up	PLN03198, PLN03198, delta6-acyl-lipid desaturase; Provisional. 5.40286e-58	KOG4232, KOG4232, KOG4232, Delta 6-fatty acid desaturase/delta-8 sphingolipid desaturase [Lipid transport and metabolism]. 8.8013e-65	gi|1021030371|gb|KZM88156.1| hypothetical protein DCAR_025231 [Daucus carota subsp. sativus] 1.5e-253	gi|123701696|emb|AM463318.1| Vitis vinifera, whole genome shotgun sequence, contig VV78X175817.8, clone ENTAV 115 5.29824e-79	pfam00173, Cyt-b5, Cytochrome b5-like Heme/Steroid binding domain. This family includes heme binding domains from a diverse range of proteins. This family also includes proteins that bind to steroids. The family includes progesterone receptors. Many members of this subfamily are membrane anchored by an N-terminal transmembrane alpha helix. This family also includes a domain in some chitin synthas…	sp|Q43469|SLD1_HELAN Delta(8)-fatty-acid desaturase OS=Helianthus annuus GN=sld1 PE=1 SV=1 0.0	tr|A0A103XUU8|A0A103XUU8_CYNCS Cytochrome b5-like heme/steroid binding domain-containing protein OS=Cynara cardunculus var. scolymus GN=Ccrd_000625 PE=4 SV=1 7.1e-208	GO:0006629, lipid metabolic process;GO:0006665, sphingolipid metabolic process;GO:0016021, integral component of membrane;GO:0016491, oxidoreductase activity;GO:0046872, metal ion binding	-
TRINITY_DN94806_c1_g1	1.86241133333	6.380018499999999	-1.77638886473	0.000374347324821	0.028433144157500003	down	pfam02701, zf-Dof, Dof domain, zinc finger. The Dof domain is a zinc finger DNA-binding domain, that shows resemblance to the Cys2 zinc finger. 3.21999e-28	-	gi|1021044396|gb|KZN02177.1| hypothetical protein DCAR_010931 [Daucus carota subsp. sativus] 8.6e-120	gi|1029109211|ref|XM_016865334.1| PREDICTED: Gossypium hirsutum dof zinc finger protein DOF5.7-like (LOC107933165), mRNA 3.05285e-36	pfam02701, zf-Dof, Dof domain, zinc finger. The Dof domain is a zinc finger DNA-binding domain, that shows resemblance to the Cys2 zinc finger. 7.69282e-29	sp|O82155|DOF17_ARATH Dof zinc finger protein DOF1.7 OS=Arabidopsis thaliana GN=DOF1.7 PE=2 SV=1 9.37107e-30	tr|M5VQ47|M5VQ47_PRUPE Uncharacterized protein OS=Prunus persica GN=PRUPE_ppa008556mg PE=4 SV=1 7.9e-57	GO:0003677, DNA binding;GO:0003700, DNA binding transcription factor activity;GO:0005634, nucleus;GO:0006351, transcription, DNA-templated;GO:0006355, regulation of transcription, DNA-templated;GO:0010200, response to chitin;GO:0044212, transcription regulatory region DNA binding;GO:0046872, metal ion binding	-
TRINITY_DN89905_c0_g1	15.9485880167	2.59213222183	2.62121748739	3.63631381487e-05	0.0055334686896700005	up	TIGR00815, Sulfate_transporter, high affinity sulphate transporter 1. The SulP family is a large and ubiquitous family with over 30 sequenced members derived from bacteria, fungi, plants and animals. Many organisms including Bacillus subtilis, Synechocystis sp, Saccharomyces cerevisiae, Arabidopsis thaliana and Caenorhabditis elegans possess multiple SulP family paralogues. Many of these proteins…	KOG0236, KOG0236, KOG0236, Sulfate/bicarbonate/oxalate exchanger SAT-1 and related transporters (SLC26 family) [Inorganic ion transport and metabolism]. 1.90935e-65	gi|1021028675|gb|KZM86460.1| hypothetical protein DCAR_023594 [Daucus carota subsp. sativus] 1.5e-205	gi|566190400|ref|XM_002314767.2| Populus trichocarpa sulfate transporter 3.3 family protein (POPTR_0010s12190g) mRNA, complete cds 0.0	pfam00916, Sulfate_transp, Sulfate permease family. This family of integral membrane proteins are known as the Sulfate Permease (SulP) family. SulP is a large family found in all domains of life. Although sulfate is a commonly transported ion there are many other activities in this family. See the TCDB description for a comprehensive summary. 2.24185e-79	sp|Q9SXS2|SUT33_ARATH Probable sulfate transporter 3.3 OS=Arabidopsis thaliana GN=SULTR3;3 PE=2 SV=2 0.0	tr|A0A0D2QEU0|A0A0D2QEU0_GOSRA Uncharacterized protein OS=Gossypium raimondii GN=B456_002G178600 PE=4 SV=1 4.9e-180	GO:0005887, integral component of plasma membrane;GO:0008271, secondary active sulfate transmembrane transporter activity;GO:0015116, sulfate transmembrane transporter activity;GO:0015293, symporter activity;GO:0016021, integral component of membrane	-
TRINITY_DN91471_c1_g2	0.0001	5.621611	-15.778696006199999	5.55726230917e-05	0.00749006061261	down	-	-	-	-	-	-	-	-	-
TRINITY_DN75494_c4_g1	0.35473785	5.558626	-3.96990313976	0.000231850535871	0.0207560390596	down	cd05302, FDH, NAD-dependent Formate Dehydrogenase (FDH). NAD-dependent formate dehydrogenase (FDH) catalyzes the NAD+-dependent oxidation of a formate anion to carbon dioxide coupled with the reduction of NAD+ to NADH. Formate/glycerate and related dehydrogenases of the D-specific 2-hydroxy acid dehydrogenase family have 2 highly similar subdomains of the alpha/beta form, with NAD binding occurri…	KOG0069, KOG0069, KOG0069, Glyoxylate/hydroxypyruvate reductase (D-isomer-specific 2-hydroxy acid dehydrogenase superfamily) [Energy production and conversion]. 2.82847e-41	gi|475566508|gb|EMT15043.1| Formate dehydrogenase, mitochondrial [Aegilops tauschii] 2.5e-61	gi|1022791217|ref|XM_016375591.1| Exophiala spinifera formate dehydrogenase partial mRNA 1.9634e-169	pfam02826, 2-Hacid_dh_C, D-isomer specific 2-hydroxyacid dehydrogenase, NAD binding domain. This domain is inserted into the catalytic domain, the large dehydrogenase and D-lactate dehydrogenase families in SCOP. N-terminal portion of which is represented by family pfam00389. 2.1849e-32	sp|Q03134|FDH_EMENI Formate dehydrogenase OS=Emericella nidulans (strain FGSC A4 / ATCC 38163 / CBS 112.46 / NRRL 194 / M139) GN=aciA PE=2 SV=3 2.61406e-139	tr|A0A0D6QU96|A0A0D6QU96_ARACU Uncharacterized protein OS=Araucaria cunninghamii PE=3 SV=1 1.6e-111	GO:0005576, extracellular region;GO:0005622, intracellular;GO:0005829, cytosol;GO:0006083, acetate metabolic process;GO:0008863, formate dehydrogenase (NAD+) activity;GO:0016616, oxidoreductase activity, acting on the CH-OH group of donors, NAD or NADP as acceptor;GO:0042183, formate catabolic process;GO:0051287, NAD binding	-
TRINITY_DN70213_c0_g1	1.2110466666700002	6.224513	-2.3617065073599997	4.7323287586e-06	0.00120863953239	down	cd01803, Ubiquitin, Ubiquitin. Ubiquitin (includes Ubq/RPL40e and Ubq/RPS27a fusions as well as homopolymeric multiubiquitin protein chains). 9.80364e-32	KOG0004, KOG0004, KOG0004, Ubiquitin/40S ribosomal protein S27a fusion [Translation, ribosomal structure and biogenesis]. 7.23441e-62	gi|326503930|dbj|BAK02751.1| predicted protein [Hordeum vulgare subsp. vulgare] 9.6e-54	gi|615411222|ref|XM_007583487.1| Neofusicoccum parvum UCRNP2 putative ubiquitin-40s ribosomal protein s31 fusion protein mRNA 9.84263e-156	pfam00240, ubiquitin, Ubiquitin family. This family contains a number of ubiquitin-like proteins: SUMO (smt3 homologue), Nedd8, Elongin B, Rub1, and Parkin. A number of them are thought to carry a distinctive five-residue motif termed the proteasome-interacting motif (PIM), which may have a biologically significant role in protein delivery to proteasomes and recruitment of proteasomes to transcri…	sp|P14799|RS27A_NEUCR Ubiquitin-40S ribosomal protein S27a OS=Neurospora crassa (strain ATCC 24698 / 74-OR23-1A / CBS 708.71 / DSM 1257 / FGSC 987) GN=ubi::crp-6 PE=1 SV=4 2.69699e-60	tr|F2E5X9|F2E5X9_HORVD Predicted protein OS=Hordeum vulgare var. distichum PE=2 SV=1 7.4e-54	GO:0003735, structural constituent of ribosome;GO:0005634, nucleus;GO:0005840, ribosome;GO:0006412, translation;GO:0046872, metal ion binding	K02977-ko03010 Ribosome
TRINITY_DN77263_c0_g1	7.5671933333300005	0.240132	4.97785872976	0.00011228125733600002	0.0123641295867	up	-	-	-	-	-	-	-	-	-
TRINITY_DN92680_c1_g5	0.077597	6.766055000000001	-6.44617021731	1.1887141757e-06	0.00042984824649300004	down	-	-	-	-	-	-	-	-	-
TRINITY_DN90651_c0_g3	34.3140026667	4.37671058333	2.97087853166	0.0008091867727830001	0.046317193343599995	up	cd14133, PKc_DYRK_like, Catalytic domain of Dual-specificity tYrosine-phosphorylated and -Regulated Kinase-like protein kinases. Dual-specificity PKs catalyze the transfer of the gamma-phosphoryl group from ATP to serine/threonine (S/T) as well as tyrosine residues on protein substrates. This subfamily is composed of the dual-specificity DYRKs and YAK1, as well as the S/T kinases (STKs), HIPKs. D…	KOG0667, KOG0667, KOG0667, Dual-specificity tyrosine-phosphorylation regulated kinase [General function prediction only]. 2.98569e-34	gi|1021045277|gb|KZN03058.1| hypothetical protein DCAR_011814 [Daucus carota subsp. sativus] 9.4e-52	gi|764633799|ref|XM_004307604.2| PREDICTED: Fragaria vesca subsp. vesca dual specificity protein kinase pom1 (LOC101305008), mRNA 1.27211e-75	pfam00069, Pkinase, Protein kinase domain. 2.29615e-19	sp|Q54BC9|DYRK2_DICDI Probable serine/threonine-protein kinase dyrk2 OS=Dictyostelium discoideum GN=dyrk2 PE=3 SV=1 8.76192e-26	tr|A0A068V015|A0A068V015_COFCA Uncharacterized protein OS=Coffea canephora GN=GSCOC_T00039181001 PE=4 SV=1 1.4e-50	GO:0004672, protein kinase activity;GO:0004674, protein serine/threonine kinase activity;GO:0004712, protein serine/threonine/tyrosine kinase activity;GO:0005524, ATP binding;GO:0005737, cytoplasm	-
TRINITY_DN91782_c0_g3	5.18944916667	0.0001	15.663293791600001	1.1714123610200002e-16	4.09277421991e-13	up	PLN03226, PLN03226, serine hydroxymethyltransferase; Provisional. 9.11489e-61	KOG2467, KOG2467, KOG2467, Glycine/serine hydroxymethyltransferase [Amino acid transport and metabolism]. 7.85784e-71	gi|629103070|gb|KCW68539.1| hypothetical protein EUGRSUZ_F02167 [Eucalyptus grandis] 1.9e-71	gi|590596349|ref|XM_007018250.1| Theobroma cacao Serine hydroxymethyltransferase 2 isoform 1 (TCM_034559) mRNA, complete cds 6.6114e-102	pfam00464, SHMT, Serine hydroxymethyltransferase. 2.22048e-49	sp|Q94C74|GLYM2_ARATH Serine hydroxymethyltransferase 2, mitochondrial OS=Arabidopsis thaliana GN=SHM2 PE=2 SV=2 1.0652e-90	tr|A0A059BSB9|A0A059BSB9_EUCGR Serine hydroxymethyltransferase OS=Eucalyptus grandis GN=EUGRSUZ_F02167 PE=3 SV=1 1.4e-71	GO:0004372, glycine hydroxymethyltransferase activity;GO:0005739, mitochondrion;GO:0006544, glycine metabolic process;GO:0006563, L-serine metabolic process;GO:0030170, pyridoxal phosphate binding;GO:0035999, tetrahydrofolate interconversion	-
TRINITY_DN88126_c0_g1	237.82161247599998	4.5114314238099995	5.7201507622	3.39040828249e-06	0.000937158203326	up	-	-	gi|1021047354|gb|KZN05134.1| hypothetical protein DCAR_005971 [Daucus carota subsp. sativus] 1.7e-29	-	-	sp|Q9ZV24|OP161_ARATH Outer envelope pore protein 16-1, chloroplastic OS=Arabidopsis thaliana GN=OEP161 PE=1 SV=1 1.67476e-21	tr|A0A0A0LVB9|A0A0A0LVB9_CUCSA Uncharacterized protein OS=Cucumis sativus GN=Csa_1G515470 PE=4 SV=1 1.4e-23	GO:0005744, mitochondrial inner membrane presequence translocase complex;GO:0005773, vacuole;GO:0009409, response to cold;GO:0009507, chloroplast;GO:0009527, plastid outer membrane;GO:0009536, plastid;GO:0009611, response to wounding;GO:0009707, chloroplast outer membrane;GO:0009744, response to sucrose;GO:0009749, response to glucose;GO:0009753, response to jasmonic acid;GO:0009941, chloroplast …	-
TRINITY_DN62698_c0_g1	12.2362655	0.41552536666699996	4.8800829532300005	6.85423220439e-05	0.008639200870950001	up	-	-	gi|1021037356|gb|KZM95139.1| hypothetical protein DCAR_018381 [Daucus carota subsp. sativus] 1.8e-51	-	-	sp|F4IN58|PIEZO_ARATH Piezo-type mechanosensitive ion channel homolog OS=Arabidopsis thaliana GN=At2g48040/At2g48050/At2g48060 PE=2 SV=1 1.8068e-28	tr|A0A118K7M9|A0A118K7M9_CYNCS Piezo family OS=Cynara cardunculus var. scolymus GN=Ccrd_009130 PE=4 SV=1 8.5e-33	GO:0008381, mechanosensitive ion channel activity;GO:0016021, integral component of membrane	-
TRINITY_DN71770_c1_g1	2.08475416667	9.73967966667	-2.22399705184	0.0005929118013010001	0.0379407085042	down	PTZ00169, PTZ00169, ADP/ATP transporter on adenylate translocase; Provisional. 1.50734e-29	KOG0749, KOG0749, KOG0749, Mitochondrial ADP/ATP carrier proteins [Energy production and conversion]. 2.31811e-50	gi|168066133|ref|XP_001784997.1| predicted protein [Physcomitrella patens] 1.2e-65	gi|1022787542|ref|XM_016355770.1| Verruconis gallopava ADP,ATP carrier protein mRNA 6.54145e-157	pfam00153, Mito_carr, Mitochondrial carrier protein. 3.84633e-06	sp|P02723|ADT_NEUCR ADP,ATP carrier protein OS=Neurospora crassa (strain ATCC 24698 / 74-OR23-1A / CBS 708.71 / DSM 1257 / FGSC 987) GN=aac PE=3 SV=1 5.31483e-90	tr|A9U2B4|A9U2B4_PHYPA Predicted protein OS=Physcomitrella patens subsp. patens GN=PHYPADRAFT_154659 PE=3 SV=1 9.5e-66	GO:0003735, structural constituent of ribosome;GO:0005215, transporter activity;GO:0005743, mitochondrial inner membrane;GO:0006412, translation;GO:0016021, integral component of membrane;GO:0055085, transmembrane transport	-
TRINITY_DN71568_c2_g1	22.9159378167	2.49305605	3.2003641044499997	0.00011707444017899999	0.012734870643	up	-	-	-	-	-	-	-	-	-
TRINITY_DN98115_c0_g1	1.3193992	12.4336331	-3.2362948722200002	4.2935020344300005e-06	0.00111614441131	down	-	-	-	-	-	-	-	-	-
TRINITY_DN73649_c0_g2	1.4642584328000001	15.0786965049	-3.3642696103900005	0.000701028843774	0.042176111688299996	down	TIGR00730, LOG_family_protein_YJL055W, TIGR00730 family protein. This model represents one branch of a subfamily of proteins of unknown function. Both PSI-BLAST and weak hits by this model show a low level of similarity to and suggest an evolutionary relationship of the subfamily to the DprA/Smf family of DNA-processing proteins involved in chromosomal transformation with foreign DNA. Both Aquife…	-	gi|1021031892|gb|KZM89676.1| hypothetical protein DCAR_022961 [Daucus carota subsp. sativus] 9.2e-90	gi|593795281|ref|XM_007160617.1| Phaseolus vulgaris hypothetical protein (PHAVU_001G007800g) mRNA, complete cds 4.72814e-79	pfam03641, Lysine_decarbox, Possible lysine decarboxylase. The members of this family share a highly conserved motif PGGXGTXXE that is probably functionally important. This family includes proteins annotated as lysine decarboxylases, although the evidence for this is not clear. 2.75175e-37	sp|Q8L8B8|LOG3_ARATH Cytokinin riboside 5'-monophosphate phosphoribohydrolase LOG3 OS=Arabidopsis thaliana GN=LOG3 PE=1 SV=1 2.46396e-108	tr|A0A0S3SSS3|A0A0S3SSS3_PHAAN Cytokinin riboside 5'-monophosphate phosphoribohydrolase OS=Vigna angularis var. angularis GN=Vigan.08G270900 PE=3 SV=1 9.2e-90	GO:0005634, nucleus;GO:0005737, cytoplasm;GO:0009691, cytokinin biosynthetic process;GO:0016799, hydrolase activity, hydrolyzing N-glycosyl compounds	-
TRINITY_DN77233_c0_g1	0.7805928775450001	83.2245076504	-6.736294321209999	2.52767811413e-08	1.91987043682e-05	down	pfam04654, DUF599, Protein of unknown function, DUF599. This family includes several uncharacterized proteins. 1.25899e-20	-	gi|1021054139|gb|KZN11917.1| hypothetical protein DCAR_004573 [Daucus carota subsp. sativus] 1.1e-83	-	pfam04654, DUF599, Protein of unknown function, DUF599. This family includes several uncharacterized proteins. 3.00784e-21	-	tr|A0A068VCM6|A0A068VCM6_COFCA Uncharacterized protein OS=Coffea canephora GN=GSCOC_T00005443001 PE=4 SV=1 2.0e-72	GO:0016021, integral component of membrane	-
TRINITY_DN83033_c1_g2	4388.92941733	74.5165113333	5.88016512609	0.000237344642703	0.0210470482296	up	-	-	gi|1021036283|gb|KZM94066.1| hypothetical protein DCAR_017311 [Daucus carota subsp. sativus] 2.3e-29	gi|57506539|dbj|AB105039.1| Daucus carota CAISE1 mRNA for dehydrin protein, complete cds 2.09262e-33	-	-	tr|Q5KTS9|Q5KTS9_DAUCA Dehydrin protein OS=Daucus carota GN=CAISE1 PE=2 SV=1 4.5e-25	GO:0006950, response to stress;GO:0009415, response to water	-
TRINITY_DN83033_c1_g1	404.7009999	5.84114966667	6.11446025212	1.36443060493e-05	0.00267217309526	up	-	-	-	-	-	-	-	-	-
TRINITY_DN77043_c0_g1	6.251346666669999	17.8131	-1.5106996953	0.000245425244685	0.0215537984868	down	-	-	gi|1021047931|gb|KZN05711.1| hypothetical protein DCAR_006548 [Daucus carota subsp. sativus] 2.8e-38	-	-	sp|Q39204|MYC2_ARATH Transcription factor MYC2 OS=Arabidopsis thaliana GN=MYC2 PE=1 SV=2 4.63384e-15	tr|F6HU75|F6HU75_VITVI Putative uncharacterized protein OS=Vitis vinifera GN=VIT_02s0025g02610 PE=4 SV=1 4.1e-26	GO:0003677, DNA binding;GO:0003700, DNA binding transcription factor activity;GO:0005634, nucleus;GO:0006351, transcription, DNA-templated;GO:0009269, response to desiccation;GO:0009611, response to wounding;GO:0009737, response to abscisic acid;GO:0009738, abscisic acid-activated signaling pathway;GO:0009753, response to jasmonic acid;GO:0009963, positive regulation of flavonoid biosynthetic pro…	-
TRINITY_DN81157_c0_g3	37.4113693333	222.28662683299999	-2.57087247824	0.00044603570090599997	0.0320393753018	down	-	-	-	gi|22074815|gb|AY114140.1| Apium graveolens var. dulce phloem protein 2-2 (PP2-2) mRNA, complete cds 4.59927e-63	-	-	-	-	-
TRINITY_DN96244_c1_g1	9.0541368	0.92764655	3.2869299821599998	0.0006426144591749999	0.040141495341	up	-	-	-	-	-	-	-	-	-
TRINITY_DN94990_c1_g2	4.02127908333	18.9500039333	-2.23647177773	6.00143960367e-07	0.000256703193719	down	-	-	-	-	-	-	-	-	-
TRINITY_DN77126_c1_g3	0.960206153583	6.39355733333	-2.7352027738099998	0.000811383482416	0.046384326087899996	down	PLN03212, PLN03212, Transcription repressor MYB5; Provisional. 1.28041e-16	KOG0048, KOG0048, KOG0048, Transcription factor, Myb superfamily [Transcription]. 5.46214e-19	gi|1021047042|gb|KZN04822.1| hypothetical protein DCAR_005659 [Daucus carota subsp. sativus] 3.5e-77	gi|6651291|gb|AF161711.1|AF161711 Pimpinella brachycarpa myb-related transcription factor mRNA, complete cds 8.65814e-101	-	sp|Q50EX6|ODO1_PETHY Protein ODORANT1 OS=Petunia hybrida GN=ODO1 PE=2 SV=1 8.4666e-33	tr|Q9SEC4|Q9SEC4_PIMBR Myb-related transcription factor OS=Pimpinella brachycarpa PE=2 SV=1 4.6e-69	GO:0003677, DNA binding;GO:0005634, nucleus;GO:0006351, transcription, DNA-templated;GO:0006355, regulation of transcription, DNA-templated	-
TRINITY_DN67300_c3_g1	0.2561225	6.066054833330001	-4.56585263674	2.35208790955e-05	0.00397384569894	down	PLN00043, PLN00043, elongation factor 1-alpha; Provisional. 1.33664e-10	KOG0052, KOG0052, KOG0052, Translation elongation factor EF-1 alpha/Tu [Translation, ribosomal structure and biogenesis]. 1.30293e-15	gi|220966698|gb|ACL97363.1| elongation factor-1 alpha, partial [Ignatius tetrasporus] 4.3e-12	gi|32992575|dbj|AK107366.1| Oryza sativa Japonica Group cDNA clone:002-127-A11, full insert sequence 3.12122e-44	-	sp|P40911|EF1A_AJECG Elongation factor 1-alpha OS=Ajellomyces capsulatus (strain G186AR / H82 / ATCC MYA-2454 / RMSCC 2432) GN=TEF PE=2 SV=1 9.88249e-18	tr|A0A0D6QSX4|A0A0D6QSX4_ARACU Elongation factor 1-alpha OS=Araucaria cunninghamii PE=3 SV=1 5.9e-14	GO:0003746, translation elongation factor activity;GO:0003924, GTPase activity;GO:0005525, GTP binding;GO:0005737, cytoplasm	-
TRINITY_DN85891_c0_g3	7.13674433333	0.962794795217	2.88996584245	0.00021939158217	0.0200661743746	up	-	-	gi|596120152|ref|XP_007221765.1| hypothetical protein PRUPE_ppb024440mg [Prunus persica] 2.7e-06	-	-	sp|Q69V36|Y6944_ORYSJ B3 domain-containing protein Os06g0194400 OS=Oryza sativa subsp. japonica GN=Os06g0194400 PE=2 SV=1 7.0188e-06	tr|M5XAI5|M5XAI5_PRUPE Uncharacterized protein OS=Prunus persica GN=PRUPE_ppb024440mg PE=4 SV=1 2.1e-06	GO:0003677, DNA binding;GO:0005634, nucleus;GO:0006351, transcription, DNA-templated;GO:0006355, regulation of transcription, DNA-templated	-
TRINITY_DN68773_c0_g2	21.833765266700002	0.9806085833329999	4.47673974687	3.15665165663e-05	0.00495906568798	up	PLN02667, PLN02667, inositol polyphosphate multikinase. 4.04181e-72	KOG1620, KOG1620, KOG1620, Inositol polyphosphate multikinase, component of the ARGR transcription regulatory complex [Transcription, Lipid transport and metabolism, Signal transduction mechanisms]. 3.80142e-17	gi|1021035298|gb|KZM93081.1| hypothetical protein DCAR_016326 [Daucus carota subsp. sativus] 1.5e-90	-	pfam03770, IPK, Inositol polyphosphate kinase. ArgRIII has has been demonstrated to be an inositol polyphosphate kinase. 2.5476e-17	sp|Q9LY23|IPMKA_ARATH Inositol polyphosphate multikinase alpha OS=Arabidopsis thaliana GN=IPK2a PE=1 SV=1 1.68696e-67	tr|A0A061G031|A0A061G031_THECC Inositol polyphosphate kinase 2 beta OS=Theobroma cacao GN=TCM_014788 PE=4 SV=1 2.4e-69	GO:0000823, inositol-1,4,5-trisphosphate 6-kinase activity;GO:0000824, inositol tetrakisphosphate 3-kinase activity;GO:0005524, ATP binding;GO:0005634, nucleus;GO:0005829, cytosol;GO:0005886, plasma membrane;GO:0008440, inositol-1,4,5-trisphosphate 3-kinase activity;GO:0009555, pollen development;GO:0009793, embryo development ending in seed dormancy;GO:0009846, pollen germination;GO:0009860, pol…	K00915-ko04070 Phosphatidylinositol signaling system;ko00562 Inositol phosphate metabolism
TRINITY_DN73227_c0_g1	7.18187545	0.15658051666699999	5.51938401943	0.000135763532703	0.0140171835591	up	-	-	gi|1021020272|gb|KZM80233.1| hypothetical protein DCAR_032165 [Daucus carota subsp. sativus] 1.6e-36	-	-	-	tr|A0A061DMU7|A0A061DMU7_THECC Uncharacterized protein OS=Theobroma cacao GN=TCM_002274 PE=4 SV=1 1.1e-26	-	-
TRINITY_DN43666_c0_g1	18.536170833299998	0.147535833333	6.973134038189999	3.07471831077e-05	0.00489193843882	up	-	-	-	-	-	-	-	-	-
TRINITY_DN78586_c1_g1	1.72299626667	14.638598502	-3.08678595606	0.000335718052532	0.026323128127900004	down	-	-	-	-	-	-	-	-	-
TRINITY_DN71563_c1_g4	5.981639433330001	59.9326175167	-3.3247285299000002	0.000487685604094	0.033674209059900005	down	-	KOG1186, KOG1186, KOG1186, Copper amine oxidase [Secondary metabolites biosynthesis, transport and catabolism]. 3.03475e-07	gi|1021048188|gb|KZN05968.1| hypothetical protein DCAR_006805 [Daucus carota subsp. sativus] 3.4e-17	gi|731439998|ref|XM_003635566.2| PREDICTED: Vitis vinifera primary amine oxidase-like (LOC100853400), mRNA 7.59983e-24	-	sp|Q8H1H9|AMO_ARATH Primary amine oxidase OS=Arabidopsis thaliana GN=At1g62810 PE=2 SV=1 2.40665e-12	tr|V4TPP9|V4TPP9_9ROSI Amine oxidase OS=Citrus clementina GN=CICLE_v10019032mg PE=3 SV=1 1.8e-15	GO:0005507, copper ion binding;GO:0006809, nitric oxide biosynthetic process;GO:0008131, primary amine oxidase activity;GO:0009308, amine metabolic process;GO:0009738, abscisic acid-activated signaling pathway;GO:0016021, integral component of membrane;GO:0048038, quinone binding;GO:0052593, tryptamine:oxygen oxidoreductase (deaminating) activity;GO:0052594, aminoacetone:oxygen oxidoreductase(dea…	-
TRINITY_DN97070_c2_g1	153.772896333	18.262860999999997	3.0738165434900004	0.000569117310224	0.0370698655452	up	smart00679, CTNS, Repeated motif present between transmembrane helices in cystinosin, yeast ERS1p, mannose-P-dolichol utilization defect 1, and other hypothetical proteins. Function unknown, but likely to be associated with the glycosylation machinery. 8.34295e-06	KOG2913, KOG2913, KOG2913, Predicted membrane protein [Function unknown]. 1.32412e-09	gi|604345812|gb|EYU44309.1| hypothetical protein MIMGU_mgv1a009599mg [Erythranthe guttata] 1.5e-29	-	-	sp|Q95XZ6|LAAT1_CAEEL Lysosomal amino acid transporter 1 OS=Caenorhabditis elegans GN=laat-1 PE=1 SV=2 8.84348e-06	tr|A0A022RW85|A0A022RW85_ERYGU Uncharacterized protein OS=Erythranthe guttata GN=MIMGU_mgv1a009599mg PE=4 SV=1 1.1e-29	GO:0005765, lysosomal membrane;GO:0015181, arginine transmembrane transporter activity;GO:0015189, L-lysine transmembrane transporter activity;GO:0015809, arginine transport;GO:0015819, lysine transport;GO:0016021, integral component of membrane;GO:0031301, integral component of organelle membrane;GO:0080144, amino acid homeostasis	-
TRINITY_DN97658_c3_g2	0.0063663666666700005	6.82074475	-10.0652433084	1.5253403713e-09	1.49701017316e-06	down	pfam07727, RVT_2, Reverse transcriptase (RNA-dependent DNA polymerase). A reverse transcriptase gene is usually indicative of a mobile element such as a retrotransposon or retrovirus. Reverse transcriptases occur in a variety of mobile elements, including retrotransposons, retroviruses, group II introns, bacterial msDNAs, hepadnaviruses, and caulimoviruses. This Pfam entry includes reverse transc…	-	gi|147788918|emb|CAN69344.1| hypothetical protein VITISV_006017 [Vitis vinifera] 4.5e-103	gi|663673455|emb|HG975449.1| Solanum pennellii chromosome ch10, complete genome 1.4612e-12	pfam07727, RVT_2, Reverse transcriptase (RNA-dependent DNA polymerase). A reverse transcriptase gene is usually indicative of a mobile element such as a retrotransposon or retrovirus. Reverse transcriptases occur in a variety of mobile elements, including retrotransposons, retroviruses, group II introns, bacterial msDNAs, hepadnaviruses, and caulimoviruses. This Pfam entry includes reverse transc…	sp|P10978|POLX_TOBAC Retrovirus-related Pol polyprotein from transposon TNT 1-94 OS=Nicotiana tabacum PE=2 SV=1 1.80912e-64	tr|A5AS72|A5AS72_VITVI Putative uncharacterized protein OS=Vitis vinifera GN=VITISV_006017 PE=4 SV=1 3.4e-103	GO:0003676, nucleic acid binding;GO:0003964, RNA-directed DNA polymerase activity;GO:0004190, aspartic-type endopeptidase activity;GO:0004519, endonuclease activity;GO:0008270, zinc ion binding;GO:0015074, DNA integration	-
TRINITY_DN96960_c0_g1	11.3855538333	1.1746021666700002	3.27696036168	0.000265414798579	0.022750918951400002	up	cd11299, O-FucT_plant, GDP-fucose protein O-fucosyltransferase, plant specific subfamily. Some members of this plant-specific family of O-fucosyltransferases have been annotated as auxin-independent growth promotors. The function of the protein seems unclear. O-fucosyltransferase-like proteins are GDP-fucose dependent enzymes with similarities to the family 1 glycosyltransferases (GT1). They are …	-	gi|723739541|ref|XP_010312297.1| PREDICTED: uncharacterized protein At1g04910-like isoform X3 [Solanum lycopersicum] 6.6e-175	gi|764600691|ref|XM_004305107.2| PREDICTED: Fragaria vesca subsp. vesca uncharacterized protein At1g04910 (LOC101298447), mRNA 3.21048e-109	pfam10250, O-FucT, GDP-fucose protein O-fucosyltransferase. This is a family of conserved proteins representing the enzyme responsible for adding O-fucose to EGF (epidermal growth factor-like) repeats. Six highly conserved cysteines are present in O-FucT-1 as well as a DXD-like motif (ERD), conserved in mammals, Drosophila, and C. elegans. Both features are characteristic of several glycosyltrans…	sp|Q8W486|Y1491_ARATH Uncharacterized protein At1g04910 OS=Arabidopsis thaliana GN=At1g04910 PE=2 SV=1 6.7959e-65	tr|R0HN94|R0HN94_9BRAS Uncharacterized protein OS=Capsella rubella GN=CARUB_v10022799mg PE=4 SV=1 8.6e-175	GO:0000139, Golgi membrane;GO:0005737, cytoplasm;GO:0005768, endosome;GO:0005794, Golgi apparatus;GO:0005802, trans-Golgi network;GO:0016021, integral component of membrane;GO:0016757, transferase activity, transferring glycosyl groups	-
TRINITY_DN70409_c3_g4	0.0001	43.6106133333	-18.7343197549	1.6556060790299999e-21	2.06588891693e-17	down	-	-	-	-	-	-	-	-	-
TRINITY_DN72271_c0_g1	0.528163166667	6.18708216667	-3.5502035949199997	0.0007463827484880001	0.0439907516411	down	-	-	-	-	-	-	-	-	-
TRINITY_DN90585_c1_g1	145.33436840000002	1.1327447	7.003409358280001	9.97650600516e-05	0.01133183186	up	-	-	gi|1021022251|gb|KZM80372.1| hypothetical protein DCAR_032425 [Daucus carota subsp. sativus] 9.4e-11	-	-	-	tr|A0A022PUB9|A0A022PUB9_ERYGU Uncharacterized protein (Fragment) OS=Erythranthe guttata GN=MIMGU_mgv1a0140892mg PE=4 SV=1 1.5e-08	GO:0016021, integral component of membrane	-
TRINITY_DN65772_c0_g1	7.9202925	0.07158533333330001	6.78974586735	2.68879751445e-05	0.00441735755504	up	pfam04570, zf-FLZ, zinc-finger of the FCS-type, C2-C2. zf-FLZ is a FCS-like zinc-finger domain found in higher plants. It is bryophitic in origin. It carries a zf-FCS-like C2-C2 zinc finger, consisting of a consensus cysteine-signature sequence with conserved phenyl alanine and serine residue associated with a third cysteine. It acts as a protein-protein interaction module. 1.37677e-15	-	gi|965664574|dbj|BAT80283.1| hypothetical protein VIGAN_02328100 [Vigna angularis var. angularis] 7.6e-22	-	pfam04570, zf-FLZ, zinc-finger of the FCS-type, C2-C2. zf-FLZ is a FCS-like zinc-finger domain found in higher plants. It is bryophitic in origin. It carries a zf-FCS-like C2-C2 zinc finger, consisting of a consensus cysteine-signature sequence with conserved phenyl alanine and serine residue associated with a third cysteine. It acts as a protein-protein interaction module. 3.28923e-16	sp|Q8LGS1|MARD1_ARATH Protein MARD1 OS=Arabidopsis thaliana GN=MARD1 PE=2 SV=2 4.92772e-09	tr|D7SYC3|D7SYC3_VITVI Putative uncharacterized protein OS=Vitis vinifera GN=VIT_05s0077g02100 PE=4 SV=1 5.8e-22	GO:0046872, metal ion binding	-
TRINITY_DN81561_c1_g1	0.491915516667	25.8954589167	-5.718144752540001	1.23884110899e-05	0.00249329618311	down	-	-	-	-	-	-	-	-	-
TRINITY_DN87576_c0_g2	9.9453739	254.4971065	-4.67747983274	7.86444746963e-05	0.009554045801530001	down	-	-	gi|1021041322|gb|KZM99103.1| hypothetical protein DCAR_013535 [Daucus carota subsp. sativus] 3.2e-44	gi|663681403|emb|HG975522.1| Solanum lycopersicum chromosome ch10, complete genome 1.33749e-14	-	sp|Q9FL41|WTR38_ARATH WAT1-related protein At5g07050 OS=Arabidopsis thaliana GN=At5g07050 PE=2 SV=1 4.35377e-35	tr|A0A124SFJ5|A0A124SFJ5_CYNCS Drug/metabolite transporter (Fragment) OS=Cynara cardunculus var. scolymus GN=Ccrd_018264 PE=4 SV=1 1.6e-40	GO:0005886, plasma membrane;GO:0006810, transport;GO:0016021, integral component of membrane;GO:0022857, transmembrane transporter activity	-
TRINITY_DN87530_c0_g3	0.0001	6.1866010000000005	-15.916859371	4.881885954880001e-20	3.5534841041800002e-16	down	-	-	gi|1021023892|gb|KZM81680.1| hypothetical protein DCAR_029293 [Daucus carota subsp. sativus] 2.6e-23	gi|719986906|ref|XM_010253546.1| PREDICTED: Nelumbo nucifera cell division control protein 48 homolog C (LOC104593610), mRNA 2.27132e-35	-	sp|Q9SS94|CD48C_ARATH Cell division control protein 48 homolog C OS=Arabidopsis thaliana GN=CDC48C PE=2 SV=2 5.26567e-08	tr|A0A061ERI8|A0A061ERI8_THECC Cell division control protein 48 C isoform 7 (Fragment) OS=Theobroma cacao GN=TCM_020076 PE=3 SV=1 1.7e-19	GO:0005524, ATP binding;GO:0005634, nucleus;GO:0005856, cytoskeleton;GO:0007049, cell cycle;GO:0009524, phragmoplast;GO:0015031, protein transport;GO:0051301, cell division	-
TRINITY_DN82208_c0_g2	0.275066402232	5.98554689359	-4.4436312321499996	6.34568867646e-05	0.00821150916774	down	cd13132, MATE_eukaryotic, Eukaryotic members of the multidrug and toxic compound extrusion (MATE) family. The integral membrane proteins from the MATE family are involved in exporting metabolites across the cell membrane and are responsible for multidrug resistance (MDR) in many bacteria and animals. MATE has also been identified as a large multigene family in plants, where the proteins are linke…	KOG1347, KOG1347, KOG1347, Uncharacterized membrane protein, predicted efflux pump [General function prediction only]. 1.73944e-45	gi|1021019394|gb|KZM80206.1| hypothetical protein DCAR_032287 [Daucus carota subsp. sativus] 1.1e-175	-	-	sp|O49660|DTX56_ARATH Protein DETOXIFICATION 56 OS=Arabidopsis thaliana GN=DTX56 PE=1 SV=1 1.38373e-147	tr|A0A061G528|A0A061G528_THECC Protein DETOXIFICATION OS=Theobroma cacao GN=TCM_016100 PE=3 SV=1 3.5e-148	GO:0005886, plasma membrane;GO:0006855, drug transmembrane transport;GO:0015238, drug transmembrane transporter activity;GO:0015297, antiporter activity;GO:0016021, integral component of membrane;GO:0071244, cellular response to carbon dioxide;GO:1902456, regulation of stomatal opening	-
TRINITY_DN85708_c1_g1	20.2197514367	2.4063331000000003	3.07085699365	0.00010122744251200001	0.0114830044429	up	pfam14686, fn3_3, Polysaccharide lyase family 4, domain II. FnIII-like is domain II of rhamnogalacturonan lyase (RG-lyase). The full-length protein specifically recognizes and cleaves alpha-1,4 glycosidic bonds between l-rhamnose and d-galacturonic acids in the backbone of rhamnogalacturonan-I, a major component of the plant cell wall polysaccharide, pectin. This domain displays an immunoglobulin…	-	gi|970050732|ref|XP_015086894.1| PREDICTED: rhamnogalacturonate lyase-like [Solanum pennellii] 1.7e-10	gi|123684387|emb|AM456498.1| Vitis vinifera, whole genome shotgun sequence, contig VV78X245808.10, clone ENTAV 115 8.0288e-13	pfam14686, fn3_3, Polysaccharide lyase family 4, domain II. FnIII-like is domain II of rhamnogalacturonan lyase (RG-lyase). The full-length protein specifically recognizes and cleaves alpha-1,4 glycosidic bonds between l-rhamnose and d-galacturonic acids in the backbone of rhamnogalacturonan-I, a major component of the plant cell wall polysaccharide, pectin. This domain displays an immunoglobulin…	-	tr|K4BPU9|K4BPU9_SOLLC Uncharacterized protein OS=Solanum lycopersicum PE=4 SV=1 1.3e-10	GO:0003824, catalytic activity;GO:0005975, carbohydrate metabolic process;GO:0030246, carbohydrate binding	-
TRINITY_DN74527_c0_g2	0.9806819999999999	10.8172373333	-3.4634028810900004	0.00034378736367699994	0.0268593871691	down	PTZ00018, PTZ00018, histone H3; Provisional. 2.2887e-84	KOG1745, KOG1745, KOG1745, Histones H3 and H4 [Chromatin structure and dynamics]. 4.20132e-81	gi|85077297|ref|XP_956003.1| histone H3 [Neurospora crassa OR74A] 2.3e-62	gi|1022826460|ref|XM_016385845.1| Exophiala spinifera histone H3 partial mRNA 7.02973e-132	pfam00125, Histone, Core histone H2A/H2B/H3/H4. 4.45237e-50	sp|Q0UY45|H3_PHANO Histone H3 OS=Phaeosphaeria nodorum (strain SN15 / ATCC MYA-4574 / FGSC 10173) GN=HHT1 PE=3 SV=1 5.57973e-91	tr|A0A0D6QRC7|A0A0D6QRC7_ARACU Histone H3 OS=Araucaria cunninghamii PE=3 SV=1 7.8e-63	GO:0000786, nucleosome;GO:0003677, DNA binding;GO:0005634, nucleus	-
TRINITY_DN98711_c1_g1	5.678426266669999	0.23722821666700003	4.5811436291300005	0.000337323935178	0.0264253217632	up	-	-	-	-	-	-	-	-	-
TRINITY_DN88639_c0_g2	5.01655433333	16.6365716	-1.72958947809	0.00042403953853600005	0.0310252940997	down	-	-	gi|1021045158|gb|KZN02939.1| hypothetical protein DCAR_011695 [Daucus carota subsp. sativus] 3.4e-97	gi|1026060101|ref|XM_016719062.1| PREDICTED: Capsicum annuum uncharacterized LOC107872305 (LOC107872305), mRNA 7.67699e-82	-	-	tr|B9HMH8|B9HMH8_POPTR Uncharacterized protein OS=Populus trichocarpa GN=POPTR_0008s05590g PE=4 SV=1 1.6e-83	-	-
TRINITY_DN88809_c1_g1	2487.1472280000003	103.958406333	4.5804135832699995	0.000512834081921	0.034643865857300005	up	-	-	gi|1021036282|gb|KZM94065.1| hypothetical protein DCAR_017310 [Daucus carota subsp. sativus] 1.9e-24	-	-	sp|P46525|CS120_WHEAT Cold-shock protein CS120 OS=Triticum aestivum GN=CS120 PE=2 SV=2 6.18834e-06	tr|Q5KTS9|Q5KTS9_DAUCA Dehydrin protein OS=Daucus carota GN=CAISE1 PE=2 SV=1 5.4e-16	GO:0006950, response to stress;GO:0009415, response to water	-
TRINITY_DN96292_c1_g2	0.22504656666700001	7.0475065	-4.96881744331	2.46229124479e-05	0.00415010204907	down	-	-	gi|1021054182|gb|KZN11960.1| hypothetical protein DCAR_004616 [Daucus carota subsp. sativus] 5.0e-20	-	-	-	-	-	-
TRINITY_DN82420_c1_g3	8.36818913333	0.684342695	3.61212459634	0.00011262509585899999	0.012374168865399998	up	pfam03110, SBP, SBP domain. SBP domains (for SQUAMOSA-pROMOTER BINDING PROTEIN) are found in plant proteins. It is a sequence specific DNA-binding domain. Members of family probably function as transcription factors involved in the control of early flower development. The domain contains 10 conserved cysteine and histidine residues that probably are zinc ligands. 4.38601e-30	-	gi|1021035012|gb|KZM92796.1| hypothetical protein DCAR_019839 [Daucus carota subsp. sativus] 1.4e-137	gi|5931640|emb|AJ011622.1| Antirrhinum majus mRNA for squamosa promoter binding protein-homologue 4, partial 2.69164e-51	pfam03110, SBP, SBP domain. SBP domains (for SQUAMOSA-pROMOTER BINDING PROTEIN) are found in plant proteins. It is a sequence specific DNA-binding domain. Members of family probably function as transcription factors involved in the control of early flower development. The domain contains 10 conserved cysteine and histidine residues that probably are zinc ligands. 1.04786e-30	sp|A3C057|SPL17_ORYSJ Squamosa promoter-binding-like protein 17 OS=Oryza sativa subsp. japonica GN=SPL17 PE=2 SV=2 7.28157e-43	tr|A0A061EXC5|A0A061EXC5_THECC Promoter-binding protein SPL9 OS=Theobroma cacao GN=TCM_024873 PE=4 SV=1 7.6e-75	GO:0003677, DNA binding;GO:0005634, nucleus;GO:0006351, transcription, DNA-templated;GO:0006355, regulation of transcription, DNA-templated;GO:0046872, metal ion binding	-
TRINITY_DN77154_c1_g3	5.890753333330001	0.0001	15.846164523099999	2.6089294121399998e-23	4.60702367283e-19	up	-	-	-	-	-	-	-	-	-
TRINITY_DN81482_c0_g1	1.42872893333	5.03648566667	-1.81768518238	1.21642556558e-05	0.00245951675641	down	-	-	gi|1021032414|gb|KZM90198.1| hypothetical protein DCAR_022437 [Daucus carota subsp. sativus] 2.6e-12	-	-	-	tr|M0ZWQ8|M0ZWQ8_SOLTU Auxin response factor OS=Solanum tuberosum GN=PGSC0003DMG400003771 PE=3 SV=1 8.6e-08	GO:0005634, nucleus;GO:0006351, transcription, DNA-templated;GO:0006355, regulation of transcription, DNA-templated;GO:0009734, auxin-activated signaling pathway;GO:0009908, flower development;GO:0009942, longitudinal axis specification;GO:0010305, leaf vascular tissue pattern formation;GO:0016020, membrane;GO:0044212, transcription regulatory region DNA binding;GO:0048364, root development;GO:00…	-
TRINITY_DN88959_c0_g1	3.28332121667	13.9847003333	-2.0906215349200004	0.000290140492789	0.024021707700099995	down	-	-	gi|1021048153|gb|KZN05933.1| hypothetical protein DCAR_006770 [Daucus carota subsp. sativus] 2.2e-81	gi|1025096476|ref|XM_016608902.1| PREDICTED: Nicotiana tabacum homeobox protein HD1-like (LOC107787343), mRNA 2.97642e-97	pfam05920, Homeobox_KN, Homeobox KN domain. This is a homeobox transcription factor KN domain conserved from fungi to human and plants. They were first identified as TALE homeobox genes in eukaryotes, (including KNOX and MEIS genes). They have been recently classified. 6.96877e-06	sp|P46606|HD1_BRANA Homeobox protein HD1 OS=Brassica napus GN=HD1 PE=2 SV=1 4.55577e-78	tr|A0A061G401|A0A061G401_THECC KNOTTED-like homeobox of 7 OS=Theobroma cacao GN=TCM_016150 PE=4 SV=1 2.2e-73	GO:0003677, DNA binding;GO:0005634, nucleus;GO:0006355, regulation of transcription, DNA-templated;GO:0010089, xylem development;GO:0045892, negative regulation of transcription, DNA-templated;GO:2000652, regulation of secondary cell wall biogenesis	-
TRINITY_DN97992_c2_g1	0.17053283333299998	9.265282000000001	-5.76371344842	3.55460061361e-06	0.000970261561867	down	-	-	-	-	-	-	-	-	-
TRINITY_DN94426_c0_g3	9.688142333330001	0.022083166666700002	8.77712918478	5.49076944105e-05	0.00746082412867	up	-	-	-	-	-	-	-	-	-
TRINITY_DN64463_c0_g1	0.0205855	7.072449000000001	-8.42443756742	4.4934887745100003e-07	0.000209889178603	down	-	-	-	-	-	-	-	-	-
TRINITY_DN91042_c0_g1	31.64382785	0.0001	18.2715646029	2.9440410710400004e-32	2.5715315543200003e-27	up	-	-	-	-	-	-	-	-	-
TRINITY_DN79477_c0_g2	1.005426	24.652434433299998	-4.615851312709999	0.000148818363506	0.0151501603697	down	cd14663, STKc_SnRK3, Catalytic domain of the Serine/Threonine Kinases, Sucrose nonfermenting 1-related protein kinase subfamily 3. STKs catalyze the transfer of the gamma-phosphoryl group from ATP to serine/threonine residues on protein substrates. The SnRKs form three different subfamilies designated SnRK1-3. SnRK3 is represented in this cd. The SnRK3 group contains members also known as CBL-int…	KOG0583, KOG0583, KOG0583, Serine/threonine protein kinase [Signal transduction mechanisms]. 4.44654e-27	gi|661886294|emb|CDP10216.1| unnamed protein product [Coffea canephora] 9.2e-71	-	pfam03822, NAF, NAF domain. 1.09431e-10	sp|O65554|CIPK6_ARATH CBL-interacting serine/threonine-protein kinase 6 OS=Arabidopsis thaliana GN=CIPK6 PE=1 SV=1 7.40452e-67	tr|A0A068UP88|A0A068UP88_COFCA Non-specific serine/threonine protein kinase OS=Coffea canephora GN=GSCOC_T00030870001 PE=3 SV=1 7.0e-71	GO:0004674, protein serine/threonine kinase activity;GO:0005524, ATP binding;GO:0005783, endoplasmic reticulum;GO:0007165, signal transduction;GO:0007275, multicellular organism development;GO:0009414, response to water deprivation;GO:0009651, response to salt stress;GO:0010540, basipetal auxin transport;GO:0042538, hyperosmotic salinity response	-
TRINITY_DN85775_c0_g2	59.6732469167	0.7401722666670001	6.333079387480001	3.2558182166999996e-07	0.000158874834511	up	-	-	gi|1021029968|gb|KZM87753.1| hypothetical protein DCAR_024854 [Daucus carota subsp. sativus] 5.3e-10	-	-	-	-	-	-
TRINITY_DN85775_c0_g1	34.2060916667	0.4676955	6.19253991554	9.10277519287e-05	0.0106013347303	up	-	-	-	-	-	-	-	-	-
TRINITY_DN96892_c2_g2	1.65930508333	33.1566736333	-4.3206482063	0.0004488487716530001	0.0321363102644	down	PLN03064, PLN03064, alpha,alpha-trehalose-phosphate synthase (UDP-forming); Provisional. 3.48421e-16	-	gi|1021041076|gb|KZM98857.1| hypothetical protein DCAR_013781 [Daucus carota subsp. sativus] 1.1e-15	gi|695056438|ref|XM_009418166.1| PREDICTED: Musa acuminata subsp. malaccensis alpha,alpha-trehalose-phosphate synthase [UDP-forming] 1 (LOC103997038), mRNA 2.1404e-21	-	sp|Q9SYM4|TPS1_ARATH Alpha,alpha-trehalose-phosphate synthase [UDP-forming] 1 OS=Arabidopsis thaliana GN=TPS1 PE=1 SV=1 1.68944e-15	tr|A0A059BUH5|A0A059BUH5_EUCGR Uncharacterized protein OS=Eucalyptus grandis GN=EUGRSUZ_F03232 PE=4 SV=1 4.0e-15	GO:0003825, alpha,alpha-trehalose-phosphate synthase (UDP-forming) activity;GO:0005576, extracellular region;GO:0005618, cell wall;GO:0005773, vacuole;GO:0005991, trehalose metabolic process;GO:0005992, trehalose biosynthetic process;GO:0009793, embryo development ending in seed dormancy;GO:0009832, plant-type cell wall biogenesis;GO:0010182, sugar mediated signaling pathway;GO:0051301, cell divi…	-
TRINITY_DN82181_c1_g1	0.123858533702	5.74308438419	-5.535060582610001	2.23706229094e-05	0.00383891316162	down	pfam04833, COBRA, COBRA-like protein. Family of plant proteins are designated COBRA-like (COBL) proteins. The 12 Arabidopsis members of the family are all GPI-liked. Some members of this family are annotated as phytochelatin synthase, but these annotations are incorrect. 9.49333e-59	-	gi|1021031695|gb|KZM89479.1| hypothetical protein DCAR_023158 [Daucus carota subsp. sativus] 9.9e-103	gi|971546506|ref|XM_006345043.2| PREDICTED: Solanum tuberosum COBRA-like protein 4 (LOC102584372), mRNA 3.86305e-86	pfam04833, COBRA, COBRA-like protein. Family of plant proteins are designated COBRA-like (COBL) proteins. The 12 Arabidopsis members of the family are all GPI-liked. Some members of this family are annotated as phytochelatin synthase, but these annotations are incorrect. 2.26804e-59	sp|Q9LFW3|COBL4_ARATH COBRA-like protein 4 OS=Arabidopsis thaliana GN=COBL4 PE=2 SV=2 3.49297e-90	tr|A0A022Q7M5|A0A022Q7M5_ERYGU Uncharacterized protein OS=Erythranthe guttata GN=MIMGU_mgv1a006366mg PE=4 SV=1 7.1e-85	GO:0005774, vacuolar membrane;GO:0005886, plasma membrane;GO:0009834, plant-type secondary cell wall biogenesis;GO:0010215, cellulose microfibril organization;GO:0016049, cell growth;GO:0031225, anchored component of membrane	-
TRINITY_DN83334_c0_g1	22.2519483333	105.95074266700001	-2.2513901343500002	0.000150845369107	0.015338638481299998	down	-	-	-	-	-	-	-	-	-
TRINITY_DN74566_c2_g1	0.93425645	5.3227793408399995	-2.51028923572	4.13360017467e-05	0.00602767236155	down	PTZ00156, PTZ00156, 60S ribosomal protein L11; Provisional. 3.26831e-82	KOG0397, KOG0397, KOG0397, 60S ribosomal protein L11 [Translation, ribosomal structure and biogenesis]. 1.85793e-90	gi|734374014|gb|KHN20558.1| Endoglucanase 9 [Glycine soja] 6.6e-60	gi|171696277|ref|XM_001913028.1| Podospora anserina S mat+ hypothetical protein (PODANSg10112) partial mRNA 0.0	pfam00673, Ribosomal_L5_C, ribosomal L5P family C-terminus. This region is found associated with pfam00281. 1.53622e-09	sp|Q7RVN0|RL11_NEUCR 60S ribosomal protein L11 OS=Neurospora crassa (strain ATCC 24698 / 74-OR23-1A / CBS 708.71 / DSM 1257 / FGSC 987) GN=rpl-11 PE=3 SV=2 1.28656e-102	tr|A0A0D6R1L5|A0A0D6R1L5_ARACU Uncharacterized protein OS=Araucaria cunninghamii PE=3 SV=1 5.0e-60	GO:0000027, ribosomal large subunit assembly;GO:0003735, structural constituent of ribosome;GO:0005840, ribosome;GO:0006412, translation;GO:0019843, rRNA binding;GO:0022625, cytosolic large ribosomal subunit	-
TRINITY_DN77137_c0_g5	3.1021650000000003	51.316305	-4.04806996523	2.12472963013e-05	0.00368664502201	down	-	-	gi|1021049138|gb|KZN06918.1| hypothetical protein DCAR_007755 [Daucus carota subsp. sativus] 1.3e-18	-	-	-	tr|B9SRY7|B9SRY7_RICCO Putative uncharacterized protein OS=Ricinus communis GN=RCOM_0517290 PE=4 SV=1 3.3e-09	-	-
TRINITY_DN77137_c0_g3	3.62025483333	30.7730965	-3.0875064614200003	0.00022089609393400003	0.0201073848213	down	-	-	gi|1021049138|gb|KZN06918.1| hypothetical protein DCAR_007755 [Daucus carota subsp. sativus] 1.7e-16	-	-	-	tr|F6HKL5|F6HKL5_VITVI Putative uncharacterized protein OS=Vitis vinifera GN=VIT_08s0007g03260 PE=4 SV=1 3.8e-13	-	-
TRINITY_DN77137_c0_g1	0.511362	6.16034522202	-3.5905943398800004	9.28676956624e-05	0.010772529366600002	down	-	-	-	-	-	-	-	-	-
TRINITY_DN68540_c0_g1	0.10770999999999999	7.572899166669999	-6.135621615569999	1.7750285131e-06	0.00055771012782	down	-	-	-	-	-	-	-	-	-
TRINITY_DN98865_c3_g1	10.2580374667	0.6881406166670001	3.8979075359599995	0.00044180262404400005	0.0318931253958	up	pfam05042, Caleosin, Caleosin related protein. This family contains plant proteins related to caleosin. Caleosins contain calcium-binding domains and have an oleosin-like association with lipid bodies. Caleosins are present at relatively low levels and are mainly bound to microsomal membrane fractions at the early stages of seed development. As the seeds mature, overall levels of caleosins increa…	-	gi|1021024903|gb|KZM82691.1| hypothetical protein DCAR_030260 [Daucus carota subsp. sativus] 2.9e-16	-	pfam05042, Caleosin, Caleosin related protein. This family contains plant proteins related to caleosin. Caleosins contain calcium-binding domains and have an oleosin-like association with lipid bodies. Caleosins are present at relatively low levels and are mainly bound to microsomal membrane fractions at the early stages of seed development. As the seeds mature, overall levels of caleosins increa…	sp|Q9CAB7|PXG4_ARATH Probable peroxygenase 4 OS=Arabidopsis thaliana GN=PXG4 PE=1 SV=1 8.44854e-11	tr|A0A0D2UUL3|A0A0D2UUL3_GOSRA Uncharacterized protein OS=Gossypium raimondii GN=B456_011G178600 PE=4 SV=1 1.3e-08	GO:0005811, lipid droplet;GO:0009737, response to abscisic acid;GO:0009819, drought recovery;GO:0046872, metal ion binding;GO:1990137, plant seed peroxidase activity	-
TRINITY_DN97561_c3_g4	27.017616999999998	3.52040133333	2.9400886184099995	0.000718809243524	0.042974559201999996	up	-	-	-	-	-	-	-	-	-
TRINITY_DN85720_c1_g1	0.595936333333	11.489286106700002	-4.26898713881	1.27799385894e-05	0.0025428002186100003	down	-	KOG1303, KOG1303, KOG1303, Amino acid transporters [Amino acid transport and metabolism]. 8.12991e-16	gi|1021047805|gb|KZN05585.1| hypothetical protein DCAR_006422 [Daucus carota subsp. sativus] 5.4e-86	gi|731412475|ref|XM_010660076.1| PREDICTED: Vitis vinifera vacuolar amino acid transporter 1 (LOC100249618), transcript variant X3, mRNA 1.21685e-67	-	sp|P47082|AVT1_YEAST Vacuolar amino acid transporter 1 OS=Saccharomyces cerevisiae (strain ATCC 204508 / S288c) GN=AVT1 PE=1 SV=1 1.25665e-07	tr|F6HND9|F6HND9_VITVI Putative uncharacterized protein OS=Vitis vinifera GN=VIT_13s0019g04660 PE=4 SV=1 5.4e-62	GO:0000324, fungal-type vacuole;GO:0000329, fungal-type vacuole membrane;GO:0003333, amino acid transmembrane transport;GO:0005302, L-tyrosine transmembrane transporter activity;GO:0006865, amino acid transport;GO:0007034, vacuolar transport;GO:0015171, amino acid transmembrane transporter activity;GO:0015186, L-glutamine transmembrane transporter activity;GO:0015188, L-isoleucine transmembrane t…	-
TRINITY_DN79123_c2_g1	1.68490383333	6.3197253	-1.9071955987599998	0.0007428842338410001	0.043903050861499995	down	-	-	-	-	-	-	-	-	-
TRINITY_DN97697_c2_g1	176.836252	15.4609105	3.5157168743300002	0.000494397095306	0.034030026070599996	up	cd08948, 5beta-POR_like_SDR_a, progesterone 5-beta-reductase-like proteins (5beta-POR), atypical (a) SDRs. 5beta-POR catalyzes the reduction of progesterone to 5beta-pregnane-3,20-dione in Digitalis plants. This subgroup of atypical-extended SDRs, shares the structure of an extended SDR, but has a different glycine-rich nucleotide binding motif (GXXGXXG) and lacks the YXXXK active site motif of c…	-	gi|1021032884|gb|KZM90668.1| hypothetical protein DCAR_021967 [Daucus carota subsp. sativus] 3.0e-164	gi|411171740|gb|JX673780.1| Bupleurum falcatum putative progesterone 5beta-reductase mRNA, complete cds 0.0	-	sp|Q6PQJ9|5BPOR_DIGLA 3-oxo-Delta(4,5)-steroid 5-beta-reductase OS=Digitalis lanata PE=1 SV=1 4.58063e-160	tr|K7TNM5|K7TNM5_BUPFA Putative progesterone 5beta-reductase OS=Bupleurum falcatum PE=2 SV=1 6.7e-164	GO:0000166, nucleotide binding;GO:0047568, 3-oxo-5-beta-steroid 4-dehydrogenase activity;GO:0047787, delta4-3-oxosteroid 5beta-reductase activity;GO:0050662, coenzyme binding	-
TRINITY_DN63757_c0_g1	0.00921446666667	6.841385000000001	-9.53617203977	0.00041142462456599996	0.030506542174800002	down	PLN03212, PLN03212, Transcription repressor MYB5; Provisional. 4.70457e-13	KOG0048, KOG0048, KOG0048, Transcription factor, Myb superfamily [Transcription]. 1.58196e-06	gi|1021044214|gb|KZN01995.1| hypothetical protein DCAR_010749 [Daucus carota subsp. sativus] 3.8e-14	-	-	sp|Q9FNV9|MY113_ARATH Transcription factor MYB113 OS=Arabidopsis thaliana GN=MYB113 PE=1 SV=1 1.25501e-17	tr|M1K112|M1K112_IPOBA MYB transcription factor 1 OS=Ipomoea batatas GN=MYB1 PE=2 SV=1 8.8e-11	GO:0003677, DNA binding;GO:0003700, DNA binding transcription factor activity;GO:0005634, nucleus;GO:0006351, transcription, DNA-templated;GO:0006355, regulation of transcription, DNA-templated;GO:0007275, multicellular organism development;GO:0009753, response to jasmonic acid;GO:0031540, regulation of anthocyanin biosynthetic process	-
TRINITY_DN82686_c0_g4	1143.26830683	0.41133606666699996	11.4405588249	9.238052784089999e-12	1.00864524566e-08	up	pfam03181, BURP, BURP domain. The BURP domain is found at the C-terminus of several different plant proteins. It was named after the proteins in which it was first identified: the BNM2 clone-derived protein from Brassica napus; USPs and USP-like proteins; RD22 from Arabidopsis thaliana; and PG1beta from Lycopersicon esculentum. This domain is around 230 amino acid residues long. It possesses the …	-	gi|1021054071|gb|KZN11849.1| hypothetical protein DCAR_004505 [Daucus carota subsp. sativus] 2.2e-42	-	pfam03181, BURP, BURP domain. The BURP domain is found at the C-terminus of several different plant proteins. It was named after the proteins in which it was first identified: the BNM2 clone-derived protein from Brassica napus; USPs and USP-like proteins; RD22 from Arabidopsis thaliana; and PG1beta from Lycopersicon esculentum. This domain is around 230 amino acid residues long. It possesses the …	sp|Q942D4|BURP3_ORYSJ BURP domain-containing protein 3 OS=Oryza sativa subsp. japonica GN=BURP3 PE=2 SV=1 2.70301e-33	tr|B7STY7|B7STY7_CAMSI BURP domain-containing protein OS=Camellia sinensis PE=2 SV=1 2.5e-38	-	-
TRINITY_DN96271_c1_g1	0.245092166667	5.6596795	-4.52932407708	0.000460703461131	0.0324599217739	down	PLN02525, PLN02525, phosphatidic acid phosphatase family protein. 1.10041e-76	KOG2822, KOG2822, KOG2822, Sphingoid base-phosphate phosphatase [Lipid transport and metabolism]. 2.71357e-11	gi|1021036013|gb|KZM93796.1| hypothetical protein DCAR_017041 [Daucus carota subsp. sativus] 1.9e-75	-	-	sp|Q9M2G7|LPPD_ARATH Lipid phosphate phosphatase delta OS=Arabidopsis thaliana GN=LPPD PE=2 SV=1 4.41728e-69	tr|I1JQE7|I1JQE7_SOYBN Uncharacterized protein OS=Glycine max GN=GLYMA_03G207000 PE=4 SV=1 1.9e-62	GO:0005789, endoplasmic reticulum membrane;GO:0006665, sphingolipid metabolic process;GO:0009737, response to abscisic acid;GO:0016021, integral component of membrane;GO:0016787, hydrolase activity;GO:0090332, stomatal closure	-
TRINITY_DN94426_c0_g4	40.3386556667	0.23942933333299998	7.39641928224	1.0686972088399999e-06	0.000409418838159	up	PLN02192, PLN02192, 3-ketoacyl-CoA synthase. 1.66121e-28	-	gi|1021025399|gb|KZM83187.1| hypothetical protein DCAR_030756 [Daucus carota subsp. sativus] 1.1e-25	-	-	sp|O48780|KCS11_ARATH 3-ketoacyl-CoA synthase 11 OS=Arabidopsis thaliana GN=KCS11 PE=1 SV=1 8.44753e-28	tr|A0A068TSY6|A0A068TSY6_COFCA 3-ketoacyl-CoA synthase OS=Coffea canephora GN=GSCOC_T00026181001 PE=3 SV=1 2.0e-22	GO:0006633, fatty acid biosynthetic process;GO:0009409, response to cold;GO:0009416, response to light stimulus;GO:0016021, integral component of membrane;GO:0016747, transferase activity, transferring acyl groups other than amino-acyl groups	-
TRINITY_DN94426_c0_g1	17.264550500000002	0.175262316667	6.62215312836	8.27432935239e-07	0.000331531121992	up	PLN02192, PLN02192, 3-ketoacyl-CoA synthase. 0.0	-	gi|1021025397|gb|KZM83185.1| hypothetical protein DCAR_030754 [Daucus carota subsp. sativus] 1.5e-152	gi|971569097|ref|XM_006357662.2| PREDICTED: Solanum tuberosum 3-ketoacyl-CoA synthase 20-like (LOC102599412), mRNA 7.54852e-17	pfam08392, FAE1_CUT1_RppA, FAE1/Type III polyketide synthase-like protein. The members of this family are described as 3-ketoacyl-CoA synthases, type III polyketide synthases, fatty acid elongases and fatty acid condensing enzymes, and are found in both prokaryotic and eukaryotic (mainly plant) species. The region featured in this family contains the active site residues, as well as motifs involv…	sp|Q5XEP9|KCS2_ARATH 3-ketoacyl-CoA synthase 2 OS=Arabidopsis thaliana GN=KCS2 PE=2 SV=2 0.0	tr|K4BDV6|K4BDV6_SOLLC 3-ketoacyl-CoA synthase OS=Solanum lycopersicum PE=3 SV=1 1.1e-144	GO:0006633, fatty acid biosynthetic process;GO:0006970, response to osmotic stress;GO:0009611, response to wounding;GO:0009922, fatty acid elongase activity;GO:0010345, suberin biosynthetic process;GO:0016021, integral component of membrane;GO:0016747, transferase activity, transferring acyl groups other than amino-acyl groups	-
TRINITY_DN95740_c1_g3	0.014950566666700001	8.3203375	-9.12029807226	0.000590776179658	0.0378873178888	down	COG5064, SRP1, Karyopherin (importin) alpha [Intracellular trafficking and secretion]. 3.44462e-33	KOG0166, KOG0166, KOG0166, Karyopherin (importin) alpha [Intracellular trafficking, secretion, and vesicular transport]. 2.21284e-44	gi|729421695|ref|XP_010558435.1| PREDICTED: importin subunit alpha-1-like [Tarenaya hassleriana] 2.0e-48	gi|923877992|ref|XM_013856308.1| PREDICTED: Brassica napus importin subunit alpha-2-like (LOC106415559), mRNA 4.28224e-11	-	sp|Q96321|IMPA1_ARATH Importin subunit alpha-1 OS=Arabidopsis thaliana GN=IMPA1 PE=1 SV=2 4.54976e-55	tr|K4AWF0|K4AWF0_SOLLC Importin subunit alpha OS=Solanum lycopersicum PE=3 SV=1 9.9e-48	GO:0005618, cell wall;GO:0005635, nuclear envelope;GO:0005643, nuclear pore;GO:0005654, nucleoplasm;GO:0005730, nucleolus;GO:0005829, cytosol;GO:0006606, protein import into nucleus;GO:0006607, NLS-bearing protein import into nucleus;GO:0008139, nuclear localization sequence binding;GO:0008565, protein transporter activity	-
TRINITY_DN74951_c1_g1	0.81246245	27.8382458	-5.098623357019999	0.000527486949264	0.035144471821	down	cd11537, NTP-PPase_RS21-C6_like, Nucleoside Triphosphate Pyrophosphohydrolase (EC 3.6.1.8) MazG-like domain found in mouse RS21-C6 protein and its homologs. RS21-C6 proteins, highly expressed in all vertebrate genomes and green plants, act as house-cleaning enzymes, removing 5-methyl dCTP (m5dCTP) in order to prevent gene silencing. They show significant sequence similarity to the dimeric 2-deoxy…	-	gi|698510370|ref|XP_009800357.1| PREDICTED: dCTP pyrophosphatase 1-like isoform X1 [Nicotiana sylvestris] 2.0e-27	gi|1012005901|ref|XM_016087667.1| PREDICTED: Arachis duranensis dCTP pyrophosphatase 1-like (LOC107468380), mRNA 4.405e-42	-	sp|Q9QY93|DCTP1_MOUSE dCTP pyrophosphatase 1 OS=Mus musculus GN=Dctpp1 PE=1 SV=1 1.74651e-12	tr|V7CAV4|V7CAV4_PHAVU Uncharacterized protein OS=Phaseolus vulgaris GN=PHAVU_003G187100g PE=4 SV=1 3.5e-27	GO:0000287, magnesium ion binding;GO:0005829, cytosol;GO:0009143, nucleoside triphosphate catabolic process;GO:0015949, nucleobase-containing small molecule interconversion;GO:0016462, pyrophosphatase activity;GO:0032556, pyrimidine deoxyribonucleotide binding;GO:0042802, identical protein binding;GO:0047429, nucleoside-triphosphate diphosphatase activity;GO:0047840, dCTP diphosphatase activity;G…	-
TRINITY_DN70843_c0_g1	0.47935261666699996	45.388293683	-6.56508913507	5.72776476573e-05	0.007613062679310001	down	pfam16913, PUNUT, Purine nucleobase transmembrane transport. PUNUT is a family of largely plant and fungal purine transporters. Most members are 10-pass transmembrane proteins, and they belong to the drug/metabolite transporter (dmt) superfamily. The plant vascular system transports nucloebases and their derivatives such as cytokinins and caffeine by a common H+-coupled high-affinity purine trans…	-	gi|1021043041|gb|KZN00822.1| hypothetical protein DCAR_009576 [Daucus carota subsp. sativus] 1.2e-98	-	pfam16913, PUNUT, Purine nucleobase transmembrane transport. PUNUT is a family of largely plant and fungal purine transporters. Most members are 10-pass transmembrane proteins, and they belong to the drug/metabolite transporter (dmt) superfamily. The plant vascular system transports nucloebases and their derivatives such as cytokinins and caffeine by a common H+-coupled high-affinity purine trans…	sp|Q9FZ95|PUP3_ARATH Purine permease 3 OS=Arabidopsis thaliana GN=PUP3 PE=2 SV=1 1.22271e-82	tr|A0A067LBE6|A0A067LBE6_JATCU Uncharacterized protein OS=Jatropha curcas GN=JCGZ_15846 PE=4 SV=1 1.5e-88	GO:0005215, transporter activity;GO:0005345, purine nucleobase transmembrane transporter activity;GO:0006863, purine nucleobase transport;GO:0016020, membrane;GO:0016021, integral component of membrane	-
TRINITY_DN69342_c4_g4	0.052136	9.36967501667	-7.489575299169999	5.7810157112699995e-06	0.0014184111779000001	down	PTZ00009, PTZ00009, heat shock 70 kDa protein; Provisional. 0.0	KOG0101, KOG0101, KOG0101, Molecular chaperones HSP70/HSC70, HSP70 superfamily [Posttranslational modification, protein turnover, chaperones]. 0.0	gi|38325813|gb|AAR17079.1| heat shock protein 70-2 [Nicotiana tabacum] 1.1e-168	gi|597907693|ref|XM_007301084.1| Stereum hirsutum FP-91666 SS1 heat shock protein 70 (STEHIDRAFT_145273), partial mRNA 0.0	pfam00012, HSP70, Hsp70 protein. Hsp70 chaperones help to fold many proteins. Hsp70 assisted folding involves repeated cycles of substrate binding and release. Hsp70 activity is ATP dependent. Hsp70 proteins are made up of two regions: the amino terminus is the ATPase domain and the carboxyl terminus is the substrate binding region. 4.09619e-138	sp|Q01877|HSP71_PUCGR Heat shock protein HSS1 OS=Puccinia graminis GN=HSS1 PE=3 SV=1 0.0	tr|Q67BD1|Q67BD1_TOBAC Heat shock protein 70-2 OS=Nicotiana tabacum GN=HSP70-2 PE=3 SV=1 8.7e-169	GO:0005524, ATP binding;GO:0005737, cytoplasm	-
TRINITY_DN98373_c0_g1	31.5285666667	0.861895333333	5.19300309207	0.000165004982073	0.0164340822909	up	-	-	-	-	-	-	-	-	-
TRINITY_DN69427_c0_g2	0.334819983333	9.73802485	-4.862171641040001	0.000622548020858	0.0392953825274	down	-	-	gi|1021051038|gb|KZN08816.1| hypothetical protein DCAR_001472 [Daucus carota subsp. sativus] 1.6e-34	-	-	-	tr|B9RKU9|B9RKU9_RICCO Putative uncharacterized protein OS=Ricinus communis GN=RCOM_1053560 PE=4 SV=1 1.7e-20	-	-
TRINITY_DN74113_c3_g3	0.147124833333	25.1702891667	-7.4185371997	0.000269326161943	0.022928686420299996	down	pfam11034, DUF2823, Protein of unknown function (DUF2823). This family of proteins are possible glucose repressible proteins however this cannot be confirmed. Currently, no function is known. 5.55414e-21	-	-	-	pfam11034, DUF2823, Protein of unknown function (DUF2823). This family of proteins are possible glucose repressible proteins however this cannot be confirmed. Currently, no function is known. 1.32693e-21	sp|P22151|GRG1_NEUCR Glucose-repressible gene protein OS=Neurospora crassa (strain ATCC 24698 / 74-OR23-1A / CBS 708.71 / DSM 1257 / FGSC 987) GN=grg-1 PE=2 SV=1 2.92604e-23	-	-	-
TRINITY_DN88519_c0_g2	0.0001	849.8718491669999	-23.018813885300002	1.69562858994e-23	4.60702367283e-19	down	pfam03181, BURP, BURP domain. The BURP domain is found at the C-terminus of several different plant proteins. It was named after the proteins in which it was first identified: the BNM2 clone-derived protein from Brassica napus; USPs and USP-like proteins; RD22 from Arabidopsis thaliana; and PG1beta from Lycopersicon esculentum. This domain is around 230 amino acid residues long. It possesses the …	-	gi|1021042313|gb|KZN00094.1| hypothetical protein DCAR_008848 [Daucus carota subsp. sativus] 2.2e-89	-	pfam03181, BURP, BURP domain. The BURP domain is found at the C-terminus of several different plant proteins. It was named after the proteins in which it was first identified: the BNM2 clone-derived protein from Brassica napus; USPs and USP-like proteins; RD22 from Arabidopsis thaliana; and PG1beta from Lycopersicon esculentum. This domain is around 230 amino acid residues long. It possesses the …	sp|Q08298|RD22_ARATH BURP domain protein RD22 OS=Arabidopsis thaliana GN=RD22 PE=2 SV=1 6.82139e-24	tr|A0A0K9RKD8|A0A0K9RKD8_SPIOL Uncharacterized protein OS=Spinacia oleracea GN=SOVF_062030 PE=4 SV=1 1.1e-59	GO:0005768, endosome;GO:0005794, Golgi apparatus;GO:0005802, trans-Golgi network;GO:0009651, response to salt stress	-
TRINITY_DN71280_c2_g1	1.1568933714799998	97.7863943622	-6.40130594247	2.09620759389e-05	0.003669287469	down	-	-	gi|1021044225|gb|KZN02006.1| hypothetical protein DCAR_010760 [Daucus carota subsp. sativus] 1.3e-60	gi|985431429|ref|XM_006466305.2| PREDICTED: Citrus sinensis uncharacterized protein At5g65660 (LOC102627202), mRNA 1.59116e-23	-	sp|Q9LSK9|Y5566_ARATH Uncharacterized protein At5g65660 OS=Arabidopsis thaliana GN=At5g65660 PE=2 SV=1 4.02879e-42	tr|A0A068U3G3|A0A068U3G3_COFCA Uncharacterized protein OS=Coffea canephora GN=GSCOC_T00040139001 PE=4 SV=1 4.9e-39	GO:0005886, plasma membrane;GO:0016021, integral component of membrane	-
TRINITY_DN96242_c0_g1	0.463360866667	10.5869064781	-4.51400107546	9.07313487232e-05	0.0105950683381	down	PLN00188, PLN00188, enhanced disease resistance protein (EDR2); Provisional. 2.08519e-19	KOG1303, KOG1303, KOG1303, Amino acid transporters [Amino acid transport and metabolism]. 1.20098e-50	gi|1021048400|gb|KZN06180.1| hypothetical protein DCAR_007017 [Daucus carota subsp. sativus] 1.2e-101	gi|955346801|ref|XM_006589361.2| PREDICTED: Glycine max protein ENHANCED DISEASE RESISTANCE 2-like (LOC100802528), mRNA 4.39364e-36	pfam07059, DUF1336, Protein of unknown function (DUF1336). This family represents the C-terminus (approximately 250 residues) of a number of hypothetical plant proteins of unknown function. 1.7302e-19	sp|Q9LRB5|LHT2_ARATH Lysine histidine transporter 2 OS=Arabidopsis thaliana GN=LHT2 PE=1 SV=1 5.14953e-91	tr|A0A022Q1T1|A0A022Q1T1_ERYGU Uncharacterized protein OS=Erythranthe guttata GN=MIMGU_mgv1a026549mg PE=4 SV=1 1.0e-81	GO:0005886, plasma membrane;GO:0006865, amino acid transport;GO:0015293, symporter activity;GO:0016021, integral component of membrane	-
TRINITY_DN91260_c1_g3	5.04507896667	0.238947	4.40011429123	6.2752106592e-05	0.00817080195311	up	-	-	-	-	-	-	-	-	-
TRINITY_DN66480_c0_g1	0.07767618333330001	32.1577685833	-8.69347927173	5.26067790945e-05	0.00723702272134	down	-	-	-	-	-	-	-	-	-
TRINITY_DN97562_c3_g1	0.158368833333	5.21234416667	-5.04057199799	0.000296190213082	0.0243380306134	down	-	-	-	-	-	-	-	-	-
TRINITY_DN87373_c0_g7	0.0001	14.598666666700002	-17.1554770846	8.75962836057e-16	1.7389255872999998e-12	down	-	-	-	-	-	-	-	-	-
TRINITY_DN83729_c0_g4	0.121291183333	11.1319990333	-6.520094193639999	1.7440250003799998e-08	1.37239055593e-05	down	-	-	-	gi|169625293|ref|XM_001805999.1| Phaeosphaeria nodorum SN15 hypothetical protein partial mRNA 3.17449e-59	-	-	-	-	-
TRINITY_DN87656_c0_g1	0.0166688333333	5.741068	-8.42802220113	2.48216672966e-05	0.00416141683946	down	pfam00011, HSP20, Hsp20/alpha crystallin family. Not only do small heat-shock-proteins occur in eukaryotes and prokaryotes but they have also now been shown to occur in cyanobacterial phages as well as their bacterial hosts. 3.46382e-07	KOG0710, KOG0710, KOG0710, Molecular chaperone (small heat-shock protein Hsp26/Hsp42) [Posttranslational modification, protein turnover, chaperones]. 1.67556e-08	gi|806933873|gb|AKC04611.1| Hsp24 protein [Populus davidiana x Populus alba var. pyramidalis] 1.5e-22	gi|169602023|ref|XM_001794382.1| Phaeosphaeria nodorum SN15 hypothetical protein partial mRNA 2.39834e-92	pfam00011, HSP20, Hsp20/alpha crystallin family. Not only do small heat-shock-proteins occur in eukaryotes and prokaryotes but they have also now been shown to occur in cyanobacterial phages as well as their bacterial hosts. 8.27537e-08	sp|P40920|HSP30_EMENI 30 kDa heat shock protein OS=Emericella nidulans (strain FGSC A4 / ATCC 38163 / CBS 112.46 / NRRL 194 / M139) GN=hsp30 PE=2 SV=1 1.07272e-33	tr|A0A0E3TAG0|A0A0E3TAG0_9ROSI Hsp24 protein OS=Populus davidiana x Populus alba var. pyramidalis PE=3 SV=1 1.2e-22	GO:0034605, cellular response to heat;GO:0097308, cellular response to farnesol	-
TRINITY_DN78868_c1_g1	0.9425323333329999	10.2621178333	-3.44464257554	2.65892357197e-05	0.0043831981402	down	-	-	-	-	-	-	-	-	-
TRINITY_DN92098_c0_g5	37.6164573167	0.0984686833333	8.57748330085	1.13738642986e-06	0.00042456107901099995	up	cd01958, HPS_like, HPS_like: Hydrophobic Protein from Soybean (HPS)-like subfamily; composed of proteins with similarity to HPS, a small hydrophobic protein with unknown function related to cereal-type alpha-amylase inhibitors and lipid transfer proteins. In addition to HPS, members of this subfamily include a hybrid proline-rich protein (HyPRP) from maize, a dark-inducible protein (LeDI-2) from …	-	gi|1021048204|gb|KZN05984.1| hypothetical protein DCAR_006821 [Daucus carota subsp. sativus] 7.6e-28	-	pfam14547, Hydrophob_seed, Hydrophobic seed protein. This domain has a four-helix bundle structure. It contains four disulfide bonds, of which three function to keep the C- and N-terminal parts of the molecule in place. 9.47092e-19	sp|Q39176|ERLI1_ARATH Lipid transfer protein EARLI 1 OS=Arabidopsis thaliana GN=EARLI1 PE=1 SV=1 4.1468e-25	tr|A0A022PSS9|A0A022PSS9_ERYGU Uncharacterized protein OS=Erythranthe guttata GN=MIMGU_mgv1a016162mg PE=4 SV=1 1.1e-23	GO:0005576, extracellular region;GO:0005783, endoplasmic reticulum;GO:0009409, response to cold;GO:0009505, plant-type cell wall;GO:0009506, plasmodesma;GO:0009651, response to salt stress;GO:0009682, induced systemic resistance;GO:0009707, chloroplast outer membrane;GO:0009737, response to abscisic acid;GO:0050832, defense response to fungus	-
TRINITY_DN92098_c0_g1	6.870146983330001	0.1289257	5.73572918135	0.000295192127113	0.0242788575583	up	cd01958, HPS_like, HPS_like: Hydrophobic Protein from Soybean (HPS)-like subfamily; composed of proteins with similarity to HPS, a small hydrophobic protein with unknown function related to cereal-type alpha-amylase inhibitors and lipid transfer proteins. In addition to HPS, members of this subfamily include a hybrid proline-rich protein (HyPRP) from maize, a dark-inducible protein (LeDI-2) from …	-	gi|1021046325|gb|KZN04105.1| hypothetical protein DCAR_004942 [Daucus carota subsp. sativus] 6.2e-31	-	pfam14547, Hydrophob_seed, Hydrophobic seed protein. This domain has a four-helix bundle structure. It contains four disulfide bonds, of which three function to keep the C- and N-terminal parts of the molecule in place. 1.68057e-25	sp|Q9SU35|ERLL1_ARATH pEARLI1-like lipid transfer protein 1 OS=Arabidopsis thaliana GN=AZI1 PE=1 SV=1 1.24516e-30	tr|A0A059CHL9|A0A059CHL9_EUCGR Uncharacterized protein (Fragment) OS=Eucalyptus grandis GN=EUGRSUZ_D02043 PE=4 SV=1 1.5e-29	GO:0005618, cell wall;GO:0005783, endoplasmic reticulum;GO:0009506, plasmodesma;GO:0009626, plant-type hypersensitive response;GO:0009627, systemic acquired resistance;GO:0009631, cold acclimation;GO:0009682, induced systemic resistance;GO:0009707, chloroplast outer membrane;GO:0043621, protein self-association;GO:0048046, apoplast;GO:0050832, defense response to fungus;GO:0070417, cellular respo…	-
TRINITY_DN69779_c1_g2	0.19354811666700003	6.00673985	-4.9558180079800005	1.21384290007e-06	0.000434530884396	down	PTZ00048, PTZ00048, cytochrome c; Provisional. 1.65936e-42	KOG3453, KOG3453, KOG3453, Cytochrome c [Energy production and conversion]. 2.18061e-43	gi|2493971|sp|Q41346.1|CYC_STELP RecName: Full=Cytochrome c 2.1e-50	gi|440585|emb|Z21499.1| S.longipes mRNA for mitochondrial cytochrome c 6.3173e-101	-	sp|Q41346|CYC_STELP Cytochrome c OS=Stellaria longipes PE=3 SV=1 3.64869e-61	tr|E1ZA99|E1ZA99_CHLVA Putative uncharacterized protein OS=Chlorella variabilis GN=CHLNCDRAFT_30572 PE=3 SV=1 1.3e-36	GO:0005739, mitochondrion;GO:0005758, mitochondrial intermembrane space;GO:0009055, electron transfer activity;GO:0020037, heme binding;GO:0046872, metal ion binding;GO:0055114, oxidation-reduction process;GO:0070469, respiratory chain	K08738-ko04210 Apoptosis;ko04215 Apoptosis - multiple species;ko04115 p53 signaling pathway;ko02020 Two-component system;ko00920 Sulfur metabolism;ko04214 Apoptosis - fly
TRINITY_DN78556_c0_g6	5.113239867219999	0.0076378	9.38686484786	7.420050023389999e-06	0.0017146008185	up	PLN03059, PLN03059, beta-galactosidase; Provisional. 5.61714e-77	KOG0496, KOG0496, KOG0496, Beta-galactosidase [Carbohydrate transport and metabolism]. 6.50505e-26	gi|1021049449|gb|KZN07229.1| hypothetical protein DCAR_008066 [Daucus carota subsp. sativus] 1.2e-162	gi|566193665|ref|XM_002317203.2| Populus trichocarpa beta-galactosidase family protein (POPTR_0011s04410g) mRNA, complete cds 4.73174e-142	pfam02140, Gal_Lectin, Galactose binding lectin domain. 5.99433e-12	sp|Q10NX8|BGAL6_ORYSJ Beta-galactosidase 6 OS=Oryza sativa subsp. japonica GN=Os03g0255100 PE=1 SV=2 1.1369e-91	tr|B9HYZ2|B9HYZ2_POPTR Beta-galactosidase OS=Populus trichocarpa GN=POPTR_0011s04410g PE=3 SV=1 2.4e-131	GO:0004565, beta-galactosidase activity;GO:0005618, cell wall;GO:0005773, vacuole;GO:0005975, carbohydrate metabolic process;GO:0030246, carbohydrate binding;GO:0048046, apoplast	-
TRINITY_DN98842_c1_g3	3.3656555	11.5081913333	-1.77370169369	0.0008047045162689998	0.046110736653500004	down	-	-	gi|1021036757|gb|KZM94540.1| hypothetical protein DCAR_017783 [Daucus carota subsp. sativus] 4.9e-31	-	-	-	-	-	-
TRINITY_DN87252_c3_g1	0.07787831666669999	7.645448666669999	-6.617235656519999	7.93722912283e-05	0.00960863485037	down	PLN02580, PLN02580, trehalose-phosphatase. 3.30488e-49	KOG1050, KOG1050, KOG1050, Trehalose-6-phosphate synthase component TPS1 and related subunits [Carbohydrate transport and metabolism]. 3.04051e-07	gi|1021044080|gb|KZN01861.1| hypothetical protein DCAR_010615 [Daucus carota subsp. sativus] 3.1e-71	gi|1026036556|ref|XM_016708947.1| PREDICTED: Capsicum annuum probable trehalose-phosphate phosphatase 2 (LOC107863145), transcript variant X2, mRNA 1.05386e-20	pfam02358, Trehalose_PPase, Trehalose-phosphatase. This family consist of trehalose-phosphatases EC:3.1.3.12 these enzyme catalyze the de-phosphorylation of trehalose-6-phosphate to trehalose and orthophosphate. The aligned region is present in trehalose-phosphatases and comprises the entire length of the protein it is also found in the C-terminus of trehalose-6-phosphate synthase EC:2.4.1.15 adj…	sp|Q6ZGP8|TPP4_ORYSJ Probable trehalose-phosphate phosphatase 4 OS=Oryza sativa subsp. japonica GN=TPP4 PE=2 SV=1 2.39894e-51	tr|M1AII2|M1AII2_SOLTU Trehalose 6-phosphate phosphatase OS=Solanum tuberosum GN=PGSC0003DMG400009109 PE=3 SV=1 1.3e-53	GO:0004805, trehalose-phosphatase activity;GO:0005992, trehalose biosynthetic process	-
TRINITY_DN79781_c1_g1	29.1672552167	0.069877	8.70531624157	3.5478093315799997e-07	0.00017026950642100002	up	-	-	gi|1021038763|gb|KZM96546.1| hypothetical protein DCAR_019788 [Daucus carota subsp. sativus] 5.4e-07	-	-	-	-	-	-
TRINITY_DN84241_c0_g1	0.0001	69.0350717167	-19.396969951400003	3.24814987822e-21	3.54645184266e-17	down	-	-	-	-	-	-	-	-	-
TRINITY_DN71509_c1_g1	21.7731287904	7.92751890667	1.45760741896	0.00070099645055	0.042176111688299996	up	-	-	gi|567895682|ref|XP_006440329.1| hypothetical protein CICLE_v10023715mg [Citrus clementina] 4.9e-10	-	-	sp|P46254|HS22M_PEA Heat shock 22 kDa protein, mitochondrial OS=Pisum sativum GN=HSP22 PE=2 SV=1 2.21239e-09	tr|V4VLD0|V4VLD0_9ROSI Uncharacterized protein OS=Citrus clementina GN=CICLE_v10023715mg PE=3 SV=1 3.7e-10	GO:0005739, mitochondrion	-
TRINITY_DN93417_c1_g2	26.629803999999996	0.0001	18.0226822845	3.03482477588e-05	0.00484626501467	up	-	-	-	-	-	-	-	-	-
TRINITY_DN98658_c4_g1	2.10232426667	24.3925808408	-3.53638529388	0.000366160176384	0.028005343464200003	down	-	KOG1517, KOG1517, KOG1517, Guanine nucleotide binding protein MIP1 [Cell cycle control, cell division, chromosome partitioning]. 1.17271e-15	gi|747062015|ref|XP_011077498.1| PREDICTED: regulatory-associated protein of TOR 1-like [Sesamum indicum] 1.8e-17	-	-	sp|Q93YQ1|RTOR1_ARATH Regulatory-associated protein of TOR 1 OS=Arabidopsis thaliana GN=RAPTOR1 PE=1 SV=1 2.27661e-20	tr|A0A0D2T7E3|A0A0D2T7E3_GOSRA Uncharacterized protein OS=Gossypium raimondii GN=B456_011G130300 PE=4 SV=1 1.4e-17	GO:0009793, embryo development ending in seed dormancy;GO:0016049, cell growth;GO:0031929, TOR signaling;GO:0031931, TORC1 complex;GO:0040008, regulation of growth;GO:0080008, Cul4-RING E3 ubiquitin ligase complex	-
TRINITY_DN74675_c1_g4	0.0001	6.74260416667	-16.0410182844	1.0919152974299999e-06	0.00041383457361100003	down	-	-	-	-	-	-	-	-	-
TRINITY_DN58391_c0_g1	9.75806766667	0.05129505	7.57163206565	0.000451432249469	0.0321363102644	up	cd01960, nsLTP1, nsLTP1: Non-specific lipid-transfer protein type 1 (nsLTP1) subfamily; Plant nsLTPs are small, soluble proteins that facilitate the transfer of fatty acids, phospholipids, glycolipids, and steroids between membranes. In addition to lipid transport and assembly, nsLTPs also play a key role in the defense of plants against pathogens. There are two closely-related types of nsLTPs, t…	-	gi|1021042473|gb|KZN00254.1| hypothetical protein DCAR_009008 [Daucus carota subsp. sativus] 2.7e-37	-	-	sp|Q9M5X8|NLTP_PRUAV Non-specific lipid-transfer protein OS=Prunus avium PE=1 SV=1 1.00545e-18	tr|Q2PCE0|Q2PCE0_WHEAT Non-specific lipid-transfer protein OS=Triticum aestivum GN=ltp9.3b PE=3 SV=1 1.1e-19	GO:0006869, lipid transport;GO:0008289, lipid binding	-
TRINITY_DN78669_c1_g5	6.021178333330001	0.0001	15.877758226900001	0.00038292603496900004	0.028908764370300002	up	-	-	-	-	-	-	-	-	-
TRINITY_DN74378_c1_g2	56.2156371667	0.698538333333	6.33048839402	1.10057546608e-05	0.0022943189793600003	up	-	-	-	-	-	-	-	-	-
TRINITY_DN76367_c0_g1	10.2576255447	0.20832374180500002	5.621725734680001	0.00045316050392600003	0.0322330704694	up	-	-	gi|743847674|ref|XP_010939160.1| PREDICTED: monoacylglycerol lipase ABHD6 isoform X1 [Elaeis guineensis] 1.7e-60	gi|1025137831|ref|XM_016610363.1| PREDICTED: Nicotiana tabacum uncharacterized hydrolase YugF-like (LOC107788664), transcript variant X1, mRNA 1.54331e-45	-	-	tr|A0A0D2SQB7|A0A0D2SQB7_GOSRA Uncharacterized protein OS=Gossypium raimondii GN=B456_006G010600 PE=4 SV=1 4.6e-58	GO:0003824, catalytic activity;GO:0016021, integral component of membrane	-
TRINITY_DN94521_c0_g1	0.33823343333300004	15.7268107667	-5.5390630539100005	8.83764231047e-05	0.0104316424715	down	-	-	gi|1021022334|gb|KZM80401.1| hypothetical protein DCAR_032376 [Daucus carota subsp. sativus] 6.7e-44	-	-	-	tr|A0A0K9RI36|A0A0K9RI36_SPIOL Uncharacterized protein OS=Spinacia oleracea GN=SOVF_063920 PE=4 SV=1 1.6e-34	-	-
TRINITY_DN73699_c1_g1	0.22690566666700002	12.7949405507	-5.8173369951	0.000394397129529	0.029570305642	down	-	-	-	-	-	-	-	-	-
TRINITY_DN98883_c5_g2	1.47286143333	6.303711405	-2.09757977905	0.0006238529898539999	0.0392953825274	down	-	-	gi|643702031|gb|KDP20463.1| hypothetical protein JCGZ_06008 [Jatropha curcas] 1.8e-20	gi|1027226333|dbj|LC150823.1| Leptosphaeria sp. GUf-3 genes for 18S rRNA, ITS1, 5.8S rRNA, ITS2, 28S rRNA, partial and complete sequence, isolate: Filamentous fungus GUf-3 0.0	-	sp|Q8TGM5|ART3_YEAST Putative uncharacterized protein ART3 OS=Saccharomyces cerevisiae (strain ATCC 204508 / S288c) GN=ART3 PE=5 SV=1 3.88723e-20	tr|A0A0D2ZVE2|A0A0D2ZVE2_BRAOL Uncharacterized protein OS=Brassica oleracea var. oleracea PE=4 SV=1 8.6e-23	-	-
TRINITY_DN70723_c1_g4	0.0001	5.395230000000001	-15.719396843	4.48182161494e-15	6.635146993220001e-12	down	PLN03246, PLN03246, 26S proteasome regulatory subunit; Provisional. 7.49106e-07	-	-	-	-	-	-	-	-
TRINITY_DN91858_c1_g2	0.12652710088	5.865642296669999	-5.53477075974	2.89275043949e-05	0.00466191465331	down	-	-	gi|1021027248|gb|KZM85035.1| hypothetical protein DCAR_027543 [Daucus carota subsp. sativus] 1.7e-116	gi|985459765|ref|XM_006486177.2| PREDICTED: Citrus sinensis uncharacterized LOC102608546 (LOC102608546), mRNA 2.55273e-68	-	-	tr|W9QXE2|W9QXE2_9ROSA Uncharacterized protein OS=Morus notabilis GN=L484_012275 PE=4 SV=1 3.1e-94	-	-
TRINITY_DN95431_c1_g2	13.450835666700002	0.1797001	6.225960784680001	1.54734101385e-06	0.000510021115234	up	-	-	-	-	-	-	-	-	-
TRINITY_DN77662_c0_g4	0.3469565	5.04715933333	-3.86264493167	0.000584505348977	0.0375905133897	down	-	-	-	-	-	-	-	-	-
TRINITY_DN78445_c0_g1	7.4372572	149.414427617	-4.32840498759	0.000506477047789	0.0344274324461	down	pfam04520, Senescence_reg, Senescence regulator. This protein regulates the expression of proteins associated with leaf senescence in plants. 3.07756e-15	-	gi|1021053781|gb|KZN11559.1| hypothetical protein DCAR_004215 [Daucus carota subsp. sativus] 3.4e-85	gi|747078064|ref|XM_011087883.1| PREDICTED: Sesamum indicum uncharacterized LOC105167985 (LOC105167985), mRNA 3.259e-24	pfam04520, Senescence_reg, Senescence regulator. This protein regulates the expression of proteins associated with leaf senescence in plants. 7.35255e-16	-	tr|K4B9S2|K4B9S2_SOLLC Uncharacterized protein OS=Solanum lycopersicum PE=4 SV=1 4.4e-53	-	-
TRINITY_DN68778_c1_g1	0.680774	24.08385695	-5.14474670429	1.11636993316e-06	0.000420308467896	down	pfam11034, DUF2823, Protein of unknown function (DUF2823). This family of proteins are possible glucose repressible proteins however this cannot be confirmed. Currently, no function is known. 1.43355e-16	-	-	gi|189188657|ref|XM_001930633.1| Pyrenophora tritici-repentis Pt-1C-BFP hypothetical protein, mRNA 8.03677e-82	pfam11034, DUF2823, Protein of unknown function (DUF2823). This family of proteins are possible glucose repressible proteins however this cannot be confirmed. Currently, no function is known. 3.42487e-17	sp|P22151|GRG1_NEUCR Glucose-repressible gene protein OS=Neurospora crassa (strain ATCC 24698 / 74-OR23-1A / CBS 708.71 / DSM 1257 / FGSC 987) GN=grg-1 PE=2 SV=1 1.9254e-09	-	-	-
TRINITY_DN68671_c0_g1	16.74683025	0.06035725	8.11614526529	2.23496777847e-09	2.12193185377e-06	up	PLN02793, PLN02793, Probable polygalacturonase. 1.15959e-63	-	gi|1021052488|gb|KZN10266.1| hypothetical protein DCAR_002922 [Daucus carota subsp. sativus] 5.4e-114	gi|747065710|ref|XM_011081205.1| PREDICTED: Sesamum indicum polygalacturonase At1g48100 (LOC105163007), mRNA 1.06256e-71	pfam00295, Glyco_hydro_28, Glycosyl hydrolases family 28. Glycosyl hydrolase family 28 includes polygalacturonase EC:3.2.1.15 as well as rhamnogalacturonase A(RGase A), EC:3.2.1.-. These enzymes is important in cell wall metabolizm. 4.16334e-19	sp|Q949Z1|PGLR4_ARATH Polygalacturonase At1g48100 OS=Arabidopsis thaliana GN=At1g48100 PE=2 SV=1 4.1692e-109	tr|B9RN80|B9RN80_RICCO Polygalacturonase, putative OS=Ricinus communis GN=RCOM_1345110 PE=3 SV=1 5.1e-104	GO:0004650, polygalacturonase activity;GO:0005576, extracellular region;GO:0005618, cell wall;GO:0005975, carbohydrate metabolic process;GO:0047911, galacturan 1,4-alpha-galacturonidase activity;GO:0071555, cell wall organization	-
TRINITY_DN89209_c0_g1	89.3552986	3.24209233333	4.78455619703	1.61692544174e-05	0.0030113771121599996	up	-	-	gi|1021026232|gb|KZM84019.1| hypothetical protein DCAR_028559 [Daucus carota subsp. sativus] 2.1e-12	-	-	-	tr|M5XL35|M5XL35_PRUPE Uncharacterized protein OS=Prunus persica GN=PRUPE_ppa012915mg PE=4 SV=1 2.4e-08	-	-
TRINITY_DN96949_c1_g4	0.2142585	7.1726350000000005	-5.065078872230001	3.73487854639e-05	0.005594098625439999	down	cd14066, STKc_IRAK, Catalytic domain of the Serine/Threonine kinases, Interleukin-1 Receptor Associated Kinases and related STKs. STKs catalyze the transfer of the gamma-phosphoryl group from ATP to serine/threonine residues on protein substrates. IRAKs are involved in Toll-like receptor (TLR) and interleukin-1 (IL-1) signalling pathways, and are thus critical in regulating innate immune response…	KOG1187, KOG1187, KOG1187, Serine/threonine protein kinase [Signal transduction mechanisms]. 3.89777e-34	gi|848861949|ref|XP_012831775.1| PREDICTED: uncharacterized protein LOC105952740 [Erythranthe guttata] 8.1e-53	gi|731337854|ref|XM_010681710.1| PREDICTED: Beta vulgaris subsp. vulgaris wall-associated receptor kinase 2-like (LOC104895253), mRNA 1.46334e-33	pfam00069, Pkinase, Protein kinase domain. 4.41332e-09	sp|Q9LMN7|WAK5_ARATH Wall-associated receptor kinase 5 OS=Arabidopsis thaliana GN=WAK5 PE=2 SV=1 1.40019e-46	tr|M1AUT2|M1AUT2_SOLTU Uncharacterized protein OS=Solanum tuberosum GN=PGSC0003DMG402011794 PE=3 SV=1 3.6e-53	GO:0004674, protein serine/threonine kinase activity;GO:0005509, calcium ion binding;GO:0005524, ATP binding;GO:0007166, cell surface receptor signaling pathway;GO:0016021, integral component of membrane;GO:0030247, polysaccharide binding	-
TRINITY_DN79620_c1_g1	1.08172865	6.02245755	-2.47701367282	0.00069830648518	0.042176111688299996	down	PTZ00157, PTZ00157, 60S ribosomal protein L36a; Provisional. 4.81279e-37	KOG3464, KOG3464, KOG3464, 60S ribosomal protein L44 [Translation, ribosomal structure and biogenesis]. 3.18162e-48	gi|674915110|emb|CDY18124.1| BnaA01g23850D [Brassica napus] 2.1e-41	gi|367053022|ref|XM_003656842.1| Thielavia terrestris NRRL 8126 60S ribosomal protein L42, partial mRNA 1.26486e-81	pfam00935, Ribosomal_L44, Ribosomal protein L44. 1.79114e-27	sp|P27075|RL44_CANTR 60S ribosomal protein L44 OS=Candida tropicalis GN=RPL44 PE=3 SV=2 5.25792e-56	tr|A0A078FYC8|A0A078FYC8_BRANA BnaA01g23850D protein OS=Brassica napus GN=BnaA01g23850D PE=3 SV=1 1.6e-41	GO:0003735, structural constituent of ribosome;GO:0005840, ribosome;GO:0006412, translation;GO:0046677, response to antibiotic;GO:0046898, response to cycloheximide	K02929-ko03010 Ribosome
TRINITY_DN77221_c1_g1	1.53774858205	20.4056579833	-3.7300776805	4.62411407848e-06	0.0011879485070999999	down	PTZ00141, PTZ00141, elongation factor 1- alpha; Provisional. 1.54955e-68	KOG0052, KOG0052, KOG0052, Translation elongation factor EF-1 alpha/Tu [Translation, ribosomal structure and biogenesis]. 3.37655e-74	gi|326492680|dbj|BAJ90196.1| predicted protein [Hordeum vulgare subsp. vulgare] 3.1e-61	gi|597584366|ref|XM_007295178.1| Marssonina brunnea f. sp. 'multigermtubi' MB_m1 putative translation elongation factor 1 alpha (MBM_07351), mRNA 6.45016e-168	pfam03143, GTP_EFTU_D3, Elongation factor Tu C-terminal domain. Elongation factor Tu consists of three structural domains, this is the third domain. This domain adopts a beta barrel structure. This the third domain is involved in binding to both charged tRNA and binding to EF-Ts pfam00889. 6.00497e-12	sp|Q96WZ1|EF1A_COCIM Elongation factor 1-alpha OS=Coccidioides immitis (strain RS) GN=TEF PE=2 SV=2 9.99356e-87	tr|A0A0D6QSX4|A0A0D6QSX4_ARACU Elongation factor 1-alpha OS=Araucaria cunninghamii PE=3 SV=1 4.4e-68	GO:0003746, translation elongation factor activity;GO:0003924, GTPase activity;GO:0005525, GTP binding;GO:0005737, cytoplasm	-
TRINITY_DN70583_c1_g1	0.8990793333329999	9.78692216667	-3.44433489863	0.00030922368254500003	0.0248708664818	down	PTZ00141, PTZ00141, elongation factor 1- alpha; Provisional. 8.39678e-56	KOG0052, KOG0052, KOG0052, Translation elongation factor EF-1 alpha/Tu [Translation, ribosomal structure and biogenesis]. 1.60718e-49	gi|326492680|dbj|BAJ90196.1| predicted protein [Hordeum vulgare subsp. vulgare] 9.3e-44	gi|698996823|ref|XM_009857091.1| Neurospora tetrasperma FGSC 2508 translation elongation factor eEF-1 alpha chain mRNA 2.26847e-111	pfam00009, GTP_EFTU, Elongation factor Tu GTP binding domain. This domain contains a P-loop motif, also found in several other families such as pfam00071, pfam00025 and pfam00063. Elongation factor Tu consists of three structural domains, this plus two C-terminal beta barrel domains. 1.23812e-16	sp|Q01520|EF1A_PODAS Elongation factor 1-alpha OS=Podospora anserina GN=TEF PE=3 SV=1 5.50558e-57	tr|F2D525|F2D525_HORVD Elongation factor 1-alpha OS=Hordeum vulgare var. distichum PE=2 SV=1 7.1e-44	GO:0003746, translation elongation factor activity;GO:0003924, GTPase activity;GO:0005525, GTP binding;GO:0005737, cytoplasm	-
TRINITY_DN98371_c1_g1	0.496350283333	33.2877985498	-6.06749103652	0.000231269416432	0.0207515093343	down	pfam00854, PTR2, POT family. The POT (proton-dependent oligopeptide transport) family all appear to be proton dependent transporters. 6.38458e-06	KOG1237, KOG1237, KOG1237, H+/oligopeptide symporter [Amino acid transport and metabolism]. 4.09224e-26	gi|1021054046|gb|KZN11824.1| hypothetical protein DCAR_004480 [Daucus carota subsp. sativus] 3.1e-65	-	pfam00854, PTR2, POT family. The POT (proton-dependent oligopeptide transport) family all appear to be proton dependent transporters. 1.52533e-06	sp|Q8LPL2|PTR32_ARATH Protein NRT1/ PTR FAMILY 1.1 OS=Arabidopsis thaliana GN=NPF1.1 PE=1 SV=2 1.55252e-40	tr|A0A067GJ87|A0A067GJ87_CITSI Uncharacterized protein OS=Citrus sinensis GN=CISIN_1g039943mg PE=4 SV=1 1.0e-39	GO:0005215, transporter activity;GO:0005886, plasma membrane;GO:0016021, integral component of membrane;GO:0080054, low-affinity nitrate transmembrane transporter activity	-
TRINITY_DN71102_c0_g3	11.206884833299998	0.8682891666670001	3.6900659151699995	7.99550317805e-05	0.009632871946120001	up	-	-	gi|1021029373|gb|KZM87158.1| hypothetical protein DCAR_024292 [Daucus carota subsp. sativus] 1.1e-25	-	-	sp|Q6NM73|CRRS3_ARATH Cysteine-rich repeat secretory protein 3 OS=Arabidopsis thaliana GN=CRRSP3 PE=1 SV=1 3.11053e-11	tr|A0A0V0HG24|A0A0V0HG24_SOLCH Putative cysteine-rich repeat secretory protein 3-like (Fragment) OS=Solanum chacoense PE=4 SV=1 3.7e-16	GO:0009506, plasmodesma;GO:0010497, plasmodesmata-mediated intercellular transport;GO:0016021, integral component of membrane;GO:0046739, transport of virus in multicellular host	-
TRINITY_DN69863_c0_g1	587.039434	6.96469716667	6.39725298439	5.33957081842e-06	0.0013249871939700001	up	-	-	gi|1021024598|gb|KZM82386.1| hypothetical protein DCAR_029955 [Daucus carota subsp. sativus] 1.2e-24	-	-	sp|P83442|LEAD3_DAUCA Late embryogenesis abundant protein Dc3 OS=Daucus carota PE=2 SV=1 5.69592e-11	tr|Q9FUG0|Q9FUG0_DAUCA Lea1P OS=Daucus carota PE=2 SV=1 3.5e-08	-	-
TRINITY_DN67705_c5_g5	0.026736666666700003	5.173124	-7.59607235128	4.2196852648899997e-07	0.000199230729099	down	cd01803, Ubiquitin, Ubiquitin. Ubiquitin (includes Ubq/RPL40e and Ubq/RPS27a fusions as well as homopolymeric multiubiquitin protein chains). 1.41194e-48	KOG0003, KOG0003, KOG0003, Ubiquitin/60s ribosomal protein L40 fusion [Translation, ribosomal structure and biogenesis]. 3.98947e-50	gi|116202449|ref|XP_001227036.1| polyubiquitin [Chaetomium globosum CBS 148.51] 3.6e-60	gi|212542036|ref|XM_002151137.1| Penicillium marneffei ATCC 18224 polyubiquitin UbiD/Ubi4, putative, mRNA 1.1647e-108	pfam00240, ubiquitin, Ubiquitin family. This family contains a number of ubiquitin-like proteins: SUMO (smt3 homologue), Nedd8, Elongin B, Rub1, and Parkin. A number of them are thought to carry a distinctive five-residue motif termed the proteasome-interacting motif (PIM), which may have a biologically significant role in protein delivery to proteasomes and recruitment of proteasomes to transcri…	sp|P0CH33|UBQ11_ARATH Polyubiquitin 11 OS=Arabidopsis thaliana GN=UBQ11 PE=1 SV=1 3.0996e-80	tr|O49905|O49905_TOBAC Polyubiquitin OS=Nicotiana tabacum GN=TUQG2 PE=4 SV=1 2.8e-60	GO:0005634, nucleus;GO:0005737, cytoplasm;GO:0006511, ubiquitin-dependent protein catabolic process	-
TRINITY_DN69243_c1_g4	24.5927143333	2.58887678333	3.24783276862	0.000257474726773	0.0222890435673	up	-	-	gi|1021033629|gb|KZM91413.1| hypothetical protein DCAR_021222 [Daucus carota subsp. sativus] 2.2e-21	-	-	sp|Q9MBC1|3AT_PERFR Anthocyanidin 3-O-glucoside 6''-O-acyltransferase (Fragment) OS=Perilla frutescens PE=1 SV=1 1.57501e-10	tr|Q69FA1|Q69FA1_PHAVU Anthocyanin acyltransferase OS=Phaseolus vulgaris GN=BA7 PE=4 SV=1 9.3e-12	GO:0009718, anthocyanin-containing compound biosynthetic process;GO:0016747, transferase activity, transferring acyl groups other than amino-acyl groups	-
TRINITY_DN72409_c0_g1	5.5144269999999995	0.00857568333333	9.328743635239999	0.00010422345587	0.011727936186200001	up	-	-	gi|1021042034|gb|KZM99815.1| hypothetical protein DCAR_012823 [Daucus carota subsp. sativus] 6.2e-24	-	-	-	tr|K4BUK6|K4BUK6_SOLLC Uncharacterized protein OS=Solanum lycopersicum PE=4 SV=1 3.0e-10	GO:0005737, cytoplasm;GO:0005886, plasma membrane;GO:0009690, cytokinin metabolic process	-
TRINITY_DN74410_c0_g3	1.70685291667	11.611559033299999	-2.766151041	0.000217368161352	0.0199437571319	down	PLN02912, PLN02912, oxidoreductase, 2OG-Fe(II) oxygenase family protein. 3.71291e-66	KOG0143, KOG0143, KOG0143, Iron/ascorbate family oxidoreductases [Secondary metabolites biosynthesis, transport and catabolism, General function prediction only]. 3.2584e-71	gi|1021051900|gb|KZN09678.1| hypothetical protein DCAR_002334 [Daucus carota subsp. sativus] 4.8e-180	-	pfam03171, 2OG-FeII_Oxy, 2OG-Fe(II) oxygenase superfamily. This family contains members of the 2-oxoglutarate (2OG) and Fe(II)-dependent oxygenase superfamily. This family includes the C-terminal of prolyl 4-hydroxylase alpha subunit. The holoenzyme has the activity EC:1.14.11.2 catalysing the reaction: Procollagen L-proline + 2-oxoglutarate + O2 <=; procollagen trans- 4-hydroxy-L-proline + succi…	sp|Q84MB3|ACCH1_ARATH 1-aminocyclopropane-1-carboxylate oxidase homolog 1 OS=Arabidopsis thaliana GN=At1g06620 PE=2 SV=1 4.91453e-121	tr|A0A068V5G0|A0A068V5G0_COFCA Uncharacterized protein OS=Coffea canephora GN=GSCOC_T00015766001 PE=3 SV=1 1.5e-120	GO:0016491, oxidoreductase activity;GO:0046872, metal ion binding	-
TRINITY_DN76909_c1_g2	15.621893166700001	1.9878779999999998	2.97426817593	0.000539228879714	0.035734961278699996	up	-	-	gi|1021045277|gb|KZN03058.1| hypothetical protein DCAR_011814 [Daucus carota subsp. sativus] 4.2e-114	-	-	-	tr|A0A068V015|A0A068V015_COFCA Uncharacterized protein OS=Coffea canephora GN=GSCOC_T00039181001 PE=4 SV=1 9.5e-34	GO:0004672, protein kinase activity;GO:0005524, ATP binding	-
TRINITY_DN75858_c2_g2	7.0495181666699995	1.1280915	2.64364056281	0.00014252132438	0.0145941502	up	PLN03210, PLN03210, Resistant to P. syringae 6; Provisional. 1.18065e-21	-	gi|223535818|gb|EEF37479.1| ATP binding protein, putative [Ricinus communis] 1.1e-36	-	-	sp|Q9FL92|WRK16_ARATH Probable WRKY transcription factor 16 OS=Arabidopsis thaliana GN=WRKY16 PE=2 SV=1 6.28231e-26	tr|B9SFT6|B9SFT6_RICCO ATP binding protein, putative OS=Ricinus communis GN=RCOM_0723030 PE=4 SV=1 8.2e-37	GO:0003700, DNA binding transcription factor activity;GO:0005524, ATP binding;GO:0005634, nucleus;GO:0005774, vacuolar membrane;GO:0006351, transcription, DNA-templated;GO:0006952, defense response;GO:0007165, signal transduction;GO:0043531, ADP binding;GO:0043565, sequence-specific DNA binding	-
TRINITY_DN89699_c3_g4	0.558936333333	12.7226415	-4.50857046709	1.75262221018e-05	0.00320264209607	down	-	-	-	-	-	-	-	-	-
TRINITY_DN69787_c0_g4	0.14979795	29.9178093333	-7.64184285015	2.82148447099e-06	0.0008133604095289999	down	pfam02365, NAM, No apical meristem (NAM) protein. This is a family of no apical meristem (NAM) proteins these are plant development proteins. Mutations in NAM result in the failure to develop a shoot apical meristem in petunia embryos. NAM is indicated as having a role in determining positions of meristems and primordial. One member of this family NAP (NAC-like, activated by AP3/PI) is encoded by…	-	gi|1021032371|gb|KZM90155.1| hypothetical protein DCAR_022480 [Daucus carota subsp. sativus] 5.8e-147	gi|1031986251|ref|NM_001327142.1| Gossypium hirsutum NAC transcription factor 56-like (LOC107917926), mRNA 7.56288e-63	pfam02365, NAM, No apical meristem (NAM) protein. This is a family of no apical meristem (NAM) proteins these are plant development proteins. Mutations in NAM result in the failure to develop a shoot apical meristem in petunia embryos. NAM is indicated as having a role in determining positions of meristems and primordial. One member of this family NAP (NAC-like, activated by AP3/PI) is encoded by…	sp|Q9LD44|NAC56_ARATH NAC transcription factor 56 OS=Arabidopsis thaliana GN=NAC056 PE=2 SV=1 3.98937e-67	tr|A0A0D2NJE9|A0A0D2NJE9_GOSRA Uncharacterized protein OS=Gossypium raimondii GN=B456_002G073800 PE=4 SV=1 8.2e-85	GO:0003677, DNA binding;GO:0003700, DNA binding transcription factor activity;GO:0005634, nucleus;GO:0006351, transcription, DNA-templated;GO:0006355, regulation of transcription, DNA-templated;GO:0009753, response to jasmonic acid;GO:0044212, transcription regulatory region DNA binding;GO:0045995, regulation of embryonic development;GO:0048317, seed morphogenesis;GO:0080060, integument developme…	-
TRINITY_DN69787_c0_g1	0.050343183333300005	39.3113134333	-9.6089324064	1.7740085841599997e-06	0.00055771012782	down	pfam02365, NAM, No apical meristem (NAM) protein. This is a family of no apical meristem (NAM) proteins these are plant development proteins. Mutations in NAM result in the failure to develop a shoot apical meristem in petunia embryos. NAM is indicated as having a role in determining positions of meristems and primordial. One member of this family NAP (NAC-like, activated by AP3/PI) is encoded by…	-	gi|1021043440|gb|KZN01221.1| hypothetical protein DCAR_009975 [Daucus carota subsp. sativus] 9.5e-70	gi|743898420|ref|XM_011044199.1| PREDICTED: Populus euphratica NAC domain-containing protein 18-like (LOC105138176), mRNA 3.4944e-46	pfam02365, NAM, No apical meristem (NAM) protein. This is a family of no apical meristem (NAM) proteins these are plant development proteins. Mutations in NAM result in the failure to develop a shoot apical meristem in petunia embryos. NAM is indicated as having a role in determining positions of meristems and primordial. One member of this family NAP (NAC-like, activated by AP3/PI) is encoded by…	sp|Q8GY42|NAC25_ARATH NAC transcription factor 25 OS=Arabidopsis thaliana GN=NAC025 PE=2 SV=1 2.88761e-70	tr|A0A0D2PFA4|A0A0D2PFA4_GOSRA Uncharacterized protein OS=Gossypium raimondii GN=B456_007G267900 PE=4 SV=1 8.0e-53	GO:0003677, DNA binding;GO:0003700, DNA binding transcription factor activity;GO:0005634, nucleus;GO:0006351, transcription, DNA-templated;GO:0006355, regulation of transcription, DNA-templated	-
TRINITY_DN70321_c0_g4	24.768316666700002	0.0001	17.9181362962	2.0923394832800002e-17	1.0750563343900001e-13	up	-	-	-	-	-	-	-	-	-
TRINITY_DN98546_c2_g2	0.067128	10.663469166699999	-7.311546494189999	8.41647690431e-06	0.00188501027734	down	-	-	-	gi|1002923397|gb|KU561768.1| Aspergillus terreus strain CBS 601.65 28S ribosomal RNA gene, partial sequence ;gi|1002923398|gb|KU561769.1| Aspergillus terreus strain CBS 125.38 28S ribosomal RNA gene, partial sequence 5.6307e-110	-	-	tr|A0A0D2ZVC7|A0A0D2ZVC7_BRAOL Uncharacterized protein OS=Brassica oleracea var. oleracea PE=4 SV=1 2.9e-18	-	-
TRINITY_DN76448_c1_g4	0.19361795	6.093595866669999	-4.976009208430001	0.000122229812829	0.013148285050700002	down	cd14664, STK_BAK1_like, Catalytic domain of the Serine/Threonine Kinase, BRI1 associated kinase 1 and related STKs. STKs catalyze the transfer of the gamma-phosphoryl group from ATP to serine/threonine residues on protein substrates. This subfamily includes three leucine-rich repeat receptor-like kinases (LRR-RLKs): Arabidopsis thaliana BAK1 and CLAVATA1 (CLV1), and Physcomitrella patens CLL1B cl…	KOG1187, KOG1187, KOG1187, Serine/threonine protein kinase [Signal transduction mechanisms]. 3.03277e-08	gi|720019760|ref|XP_010262189.1| PREDICTED: inactive protein kinase SELMODRAFT_444075 [Nelumbo nucifera] 7.0e-23	gi|937893927|dbj|AP014957.1| Oryza sativa Japonica Group DNA, chromosome 1, cultivar: Nipponbare, complete sequence 1.29158e-33	-	sp|Q9XID3|Y1343_ARATH G-type lectin S-receptor-like serine/threonine-protein kinase At1g34300 OS=Arabidopsis thaliana GN=At1g34300 PE=2 SV=1 2.83726e-07	tr|M0TXV0|M0TXV0_MUSAM Uncharacterized protein OS=Musa acuminata subsp. malaccensis PE=4 SV=1 1.5e-22	GO:0004672, protein kinase activity;GO:0004674, protein serine/threonine kinase activity;GO:0005516, calmodulin binding;GO:0005524, ATP binding;GO:0005886, plasma membrane;GO:0006468, protein phosphorylation;GO:0016021, integral component of membrane;GO:0030246, carbohydrate binding;GO:0048544, recognition of pollen	-
TRINITY_DN94414_c0_g5	2.12739185	32.0025913833	-3.9110310341300005	8.94054320888e-05	0.010510492969899999	down	cd00684, Terpene_cyclase_plant_C1, Plant Terpene Cyclases, Class 1. This CD includes a diverse group of monomeric plant terpene cyclases (Tspa-Tspf) that convert the acyclic isoprenoid diphosphates, geranyl diphosphate (GPP), farnesyl diphosphate (FPP), or geranylgeranyl diphosphate (GGPP) into cyclic monoterpenes, diterpenes, or sesquiterpenes, respectively; a few form acyclic species. Terpnoid …	-	gi|527819481|gb|AGS16741.1| sesquiterpene synthase [Panax ginseng] 3.6e-92	-	pfam01397, Terpene_synth, Terpene synthase, N-terminal domain. It has been suggested that this gene family be designated tps (for terpene synthase). It has been split into six subgroups on the basis of phylogeny, called tpsa-tpsf. tpsa includes vetispiridiene synthase, 5-epi- aristolochene synthase, and (+)-delta-cadinene synthase. tpsb includes (-)-limonene synthase. tpsc includes kaurene syntha…	sp|Q6Q3H3|TPSGD_VITVI (-)-germacrene D synthase OS=Vitis vinifera GN=VIT_19s0014g04930 PE=1 SV=1 4.19534e-101	tr|S5RMQ6|S5RMQ6_PANGI Sesquiterpene synthase OS=Panax ginseng GN=STS PE=2 SV=1 2.8e-92	GO:0000287, magnesium ion binding;GO:0005737, cytoplasm;GO:0008152, metabolic process;GO:0010333, terpene synthase activity;GO:0016114, terpenoid biosynthetic process;GO:0034004, germacradienol synthase activity;GO:0052577, germacrene-D synthase activity	-
TRINITY_DN94414_c0_g2	1.4502138709799999	39.36219765	-4.76247318755	0.000688858599577	0.04190092764430001	down	cd00684, Terpene_cyclase_plant_C1, Plant Terpene Cyclases, Class 1. This CD includes a diverse group of monomeric plant terpene cyclases (Tspa-Tspf) that convert the acyclic isoprenoid diphosphates, geranyl diphosphate (GPP), farnesyl diphosphate (FPP), or geranylgeranyl diphosphate (GGPP) into cyclic monoterpenes, diterpenes, or sesquiterpenes, respectively; a few form acyclic species. Terpnoid …	-	gi|527819481|gb|AGS16741.1| sesquiterpene synthase [Panax ginseng] 3.8e-58	-	pfam03936, Terpene_synth_C, Terpene synthase family, metal binding domain. It has been suggested that this gene family be designated tps (for terpene synthase). It has been split into six subgroups on the basis of phylogeny, called tpsa-tpsf. tpsa includes vetispiridiene synthase, 5-epi- aristolochene synthase, and (+)-delta-cadinene synthase. tpsb includes (-)-limonene synthase. tpsc includes ka…	sp|Q6Q3H3|TPSGD_VITVI (-)-germacrene D synthase OS=Vitis vinifera GN=VIT_19s0014g04930 PE=1 SV=1 3.87554e-60	tr|S5RMQ6|S5RMQ6_PANGI Sesquiterpene synthase OS=Panax ginseng GN=STS PE=2 SV=1 2.9e-58	GO:0000287, magnesium ion binding;GO:0005737, cytoplasm;GO:0008152, metabolic process;GO:0010333, terpene synthase activity;GO:0016114, terpenoid biosynthetic process;GO:0034004, germacradienol synthase activity;GO:0052577, germacrene-D synthase activity	-
TRINITY_DN75999_c0_g6	0.2766675	14.9366546667	-5.754560075290001	0.00051274218026	0.034643865857300005	down	cd00868, Terpene_cyclase_C1, Terpene cyclases, Class 1. Terpene cyclases, Class 1 (C1) of the class 1 family of isoprenoid biosynthesis enzymes, which share the 'isoprenoid synthase fold' and convert linear, all-trans, isoprenoids, geranyl (C10)-, farnesyl (C15)-, or geranylgeranyl (C20)-diphosphate into numerous cyclic forms of monoterpenes, diterpenes, and sesquiterpenes. Also included in this …	-	gi|302143186|emb|CBI20481.3| unnamed protein product [Vitis vinifera] 9.3e-37	-	pfam03936, Terpene_synth_C, Terpene synthase family, metal binding domain. It has been suggested that this gene family be designated tps (for terpene synthase). It has been split into six subgroups on the basis of phylogeny, called tpsa-tpsf. tpsa includes vetispiridiene synthase, 5-epi- aristolochene synthase, and (+)-delta-cadinene synthase. tpsb includes (-)-limonene synthase. tpsc includes ka…	sp|Q6Q3H3|TPSGD_VITVI (-)-germacrene D synthase OS=Vitis vinifera GN=VIT_19s0014g04930 PE=1 SV=1 9.96589e-43	tr|F6H2I3|F6H2I3_VITVI Putative uncharacterized protein OS=Vitis vinifera GN=VIT_19s0014g04880 PE=4 SV=1 7.0e-37	GO:0000287, magnesium ion binding;GO:0005737, cytoplasm;GO:0010333, terpene synthase activity;GO:0016114, terpenoid biosynthetic process;GO:0034004, germacradienol synthase activity;GO:0052577, germacrene-D synthase activity	-
TRINITY_DN97342_c0_g1	26.829898699999998	0.554902883333	5.595462497890001	7.39931850887e-06	0.0017146008185	up	-	-	gi|1021034791|gb|KZM92575.1| hypothetical protein DCAR_020060 [Daucus carota subsp. sativus] 1.1e-38	-	-	sp|Q9SI15|BZIP2_ARATH bZIP transcription factor 2 OS=Arabidopsis thaliana GN=BZIP2 PE=1 SV=1 1.61491e-11	tr|W9SEV7|W9SEV7_9ROSA Protein ABSCISIC ACID-INSENSITIVE 5 OS=Morus notabilis GN=L484_003754 PE=4 SV=1 2.1e-16	GO:0003700, DNA binding transcription factor activity;GO:0043565, sequence-specific DNA binding;GO:0046982, protein heterodimerization activity	-
TRINITY_DN95782_c0_g1	0.5740790485989999	38.2947865552	-6.05975478263	4.92091439521e-05	0.00693269531739	down	PLN00411, PLN00411, nodulin MtN21 family protein; Provisional. 5.82384e-28	-	gi|1021027123|gb|KZM84910.1| hypothetical protein DCAR_027668 [Daucus carota subsp. sativus] 1.1e-130	-	-	sp|O80638|WTR14_ARATH WAT1-related protein At2g39510 OS=Arabidopsis thaliana GN=At2g39510 PE=2 SV=1 4.03142e-100	tr|A0A061FMY4|A0A061FMY4_THECC Nodulin MtN21 /EamA-like transporter family protein OS=Theobroma cacao GN=TCM_042830 PE=4 SV=1 1.2e-87	GO:0005886, plasma membrane;GO:0015186, L-glutamine transmembrane transporter activity;GO:0016021, integral component of membrane;GO:0022857, transmembrane transporter activity;GO:0048316, seed development;GO:0098712, L-glutamate import across plasma membrane	-
TRINITY_DN92811_c0_g3	3.6874430666699998	35.4066227167	-3.2633265581599997	0.0006239790212080001	0.0392953825274	down	PLN02601, PLN02601, beta-carotene hydroxylase. 1.95789e-39	-	gi|1021034582|gb|KZM92366.1| beta-carotene hydroxylase [Daucus carota subsp. sativus] 3.9e-41	gi|79155022|gb|DQ192193.1| Daucus carota subsp. sativus putative beta-ring carotene hydroxylase (CHXB1) mRNA, complete cds 3.59056e-122	-	sp|B3SGL0|BCH_GENLU Beta-carotene 3-hydroxylase, chloroplastic OS=Gentiana lutea GN=BHY PE=2 SV=1 2.99736e-42	tr|Q2VEX4|Q2VEX4_DAUCA Putative beta-ring carotene hydroxylase OS=Daucus carota subsp. sativus GN=CHXB1 PE=2 SV=1 2.5e-40	GO:0005506, iron ion binding;GO:0006633, fatty acid biosynthetic process;GO:0016021, integral component of membrane;GO:0016117, carotenoid biosynthetic process;GO:0016491, oxidoreductase activity;GO:0016787, hydrolase activity;GO:0031969, chloroplast membrane	K15746-ko00906 Carotenoid biosynthesis
TRINITY_DN70114_c2_g1	1.8563093000000002	18.8621445833	-3.3449846976999997	0.00058036082407	0.037494657470400004	down	PTZ00048, PTZ00048, cytochrome c; Provisional. 6.48543e-42	KOG3453, KOG3453, KOG3453, Cytochrome c [Energy production and conversion]. 6.77931e-46	gi|117958|sp|P29380.1|CYC_ARATH RecName: Full=Cytochrome c 1.9e-46	gi|758206335|ref|XM_011327203.1| Fusarium graminearum PH-1 hypothetical protein mRNA 0.0	-	sp|Q4HVX7|CYC_GIBZE Cytochrome c OS=Gibberella zeae (strain PH-1 / ATCC MYA-4620 / FGSC 9075 / NRRL 31084) GN=CYC1 PE=3 SV=2 3.08786e-72	tr|A0A090M4I4|A0A090M4I4_OSTTA Cytochrome c, class IA/ IB OS=Ostreococcus tauri GN=OT_ostta04g02580 PE=3 SV=1 7.8e-37	GO:0005739, mitochondrion;GO:0005758, mitochondrial intermembrane space;GO:0009055, electron transfer activity;GO:0020037, heme binding;GO:0046872, metal ion binding;GO:0055114, oxidation-reduction process;GO:0070469, respiratory chain	K08738-ko04210 Apoptosis;ko04215 Apoptosis - multiple species;ko04115 p53 signaling pathway;ko02020 Two-component system;ko00920 Sulfur metabolism;ko04214 Apoptosis - fly
TRINITY_DN93179_c1_g1	13.86813495	0.45837725	4.91909452768	6.50530527348e-05	0.008356160290050001	up	PLN02667, PLN02667, inositol polyphosphate multikinase. 2.12728e-12	-	gi|1021035298|gb|KZM93081.1| hypothetical protein DCAR_016326 [Daucus carota subsp. sativus] 9.4e-11	-	-	sp|Q9LY23|IPMKA_ARATH Inositol polyphosphate multikinase alpha OS=Arabidopsis thaliana GN=IPK2a PE=1 SV=1 1.22264e-11	tr|B9DGE0|B9DGE0_ARATH AT5G07370 protein OS=Arabidopsis thaliana GN=At5g07370 PE=2 SV=1 2.7e-10	GO:0000823, inositol-1,4,5-trisphosphate 6-kinase activity;GO:0000824, inositol tetrakisphosphate 3-kinase activity;GO:0005524, ATP binding;GO:0005634, nucleus;GO:0005829, cytosol;GO:0005886, plasma membrane;GO:0008440, inositol-1,4,5-trisphosphate 3-kinase activity;GO:0009555, pollen development;GO:0009793, embryo development ending in seed dormancy;GO:0009846, pollen germination;GO:0009860, pol…	-
TRINITY_DN94250_c0_g1	0.07478933333330001	6.49867	-6.44116815658	0.00012597486183	0.013386874194	down	-	-	-	-	-	-	-	-	-
TRINITY_DN83920_c0_g3	53.4814816833	0.0052769	13.307061170899999	2.31203547862e-07	0.000120927762246	up	-	-	gi|1021034966|gb|KZM92750.1| hypothetical protein DCAR_019885 [Daucus carota subsp. sativus] 4.7e-41	-	-	-	-	-	-
TRINITY_DN73738_c0_g4	0.10006595	11.9851083333	-6.904147995560001	5.77506346051e-07	0.00024972003370599995	down	-	-	gi|922342272|ref|XP_013448061.1| hypothetical protein MTR_7g031847 [Medicago truncatula] 7.3e-38	gi|156099795|gb|EF550338.1| Candida silvicultrix strain NRRL Y-7789 26S ribosomal RNA gene, partial sequence 0.0	-	sp|Q3E813|YL154_YEAST Uncharacterized protein YLR154C-G OS=Saccharomyces cerevisiae (strain ATCC 204508 / S288c) GN=YLR154C-G PE=2 SV=1 3.3475e-20	tr|A0A072TYZ4|A0A072TYZ4_MEDTR Uncharacterized protein OS=Medicago truncatula GN=MTR_7g031847 PE=4 SV=1 5.5e-38	-	-
TRINITY_DN89480_c1_g1	0.43129529999999994	9.09595936667	-4.3984779098199995	0.000214569615825	0.019770055098599998	down	-	-	-	-	-	-	-	-	-
TRINITY_DN78002_c4_g4	4.8858468333300005	18.99888	-1.9592338306700001	0.0005999150994119999	0.038313676103300005	down	-	-	gi|1021054253|gb|KZN12031.1| hypothetical protein DCAR_004687 [Daucus carota subsp. sativus] 1.0e-13	-	-	sp|O81833|SD11_ARATH G-type lectin S-receptor-like serine/threonine-protein kinase SD1-1 OS=Arabidopsis thaliana GN=SD11 PE=1 SV=1 1.48404e-11	tr|A0A067KVF4|A0A067KVF4_JATCU Serine/threonine-protein kinase OS=Jatropha curcas GN=JCGZ_00735 PE=3 SV=1 2.3e-13	GO:0004674, protein serine/threonine kinase activity;GO:0005516, calmodulin binding;GO:0005524, ATP binding;GO:0005886, plasma membrane;GO:0006468, protein phosphorylation;GO:0006952, defense response;GO:0009506, plasmodesma;GO:0016021, integral component of membrane;GO:0030246, carbohydrate binding;GO:0031625, ubiquitin protein ligase binding;GO:0048544, recognition of pollen	-
TRINITY_DN74895_c0_g5	6.43802457833	0.0001	15.974330464100001	3.5111920143899997e-07	0.00017016991058700003	up	-	-	-	-	-	-	-	-	-
TRINITY_DN89111_c1_g1	111.835057435	19.263802278900002	2.53740811237	0.00042407151099900004	0.0310252940997	up	pfam00230, MIP, Major intrinsic protein. MIP (Major Intrinsic Protein) family proteins exhibit essentially two distinct types of channel properties: (1) specific water transport by the aquaporins, and (2) small neutral solutes transport, such as glycerol by the glycerol facilitators. 3.40208e-32	KOG0223, KOG0223, KOG0223, Aquaporin (major intrinsic protein family) [Carbohydrate transport and metabolism]. 3.42745e-36	gi|1021047822|gb|KZN05602.1| hypothetical protein DCAR_006439 [Daucus carota subsp. sativus] 1.5e-107	gi|642991743|gb|KJ546467.1| Citrus trifoliata cultivar trifoliate orange putative aquaporin PIP2 (PIP2) mRNA, complete cds 4.28682e-106	pfam00230, MIP, Major intrinsic protein. MIP (Major Intrinsic Protein) family proteins exhibit essentially two distinct types of channel properties: (1) specific water transport by the aquaporins, and (2) small neutral solutes transport, such as glycerol by the glycerol facilitators. 8.12786e-33	sp|Q9ATM6|PIP24_MAIZE Aquaporin PIP2-4 OS=Zea mays GN=PIP2-4 PE=1 SV=1 2.25707e-110	tr|T2DPP4|T2DPP4_PHAVU Aquaporin PIP2 OS=Phaseolus vulgaris GN=PHAVU_007G094600g PE=2 SV=1 2.9e-98	GO:0005215, transporter activity;GO:0005886, plasma membrane;GO:0016021, integral component of membrane	-
TRINITY_DN70696_c0_g4	1.12099916667	14.0198113333	-3.6446098241400002	0.000351084871198	0.027162276567299998	down	pfam08458, PH_2, Plant pleckstrin homology-like region. This family describes a pleckstrin homology (PH)-like region found in several plant proteins of unknown function. 1.12041e-16	-	gi|571567449|ref|XP_006606075.1| PREDICTED: VAN3-binding protein-like isoform X2 [Glycine max] 6.8e-33	gi|828304853|ref|XM_004496630.2| PREDICTED: Cicer arietinum uncharacterized LOC101505664 (LOC101505664), transcript variant X2, mRNA 6.92698e-24	pfam08458, PH_2, Plant pleckstrin homology-like region. This family describes a pleckstrin homology (PH)-like region found in several plant proteins of unknown function. 2.67675e-17	sp|Q8W4K5|VAB_ARATH VAN3-binding protein OS=Arabidopsis thaliana GN=VAB PE=1 SV=1 2.02372e-22	tr|A0A0B2Q7I5|A0A0B2Q7I5_GLYSO Uncharacterized protein OS=Glycine soja GN=glysoja_012524 PE=4 SV=1 5.2e-33	GO:0009733, response to auxin;GO:0009734, auxin-activated signaling pathway;GO:0010087, phloem or xylem histogenesis;GO:0010305, leaf vascular tissue pattern formation	-
TRINITY_DN85384_c2_g3	5.411876916669999	0.41913062893299996	3.6906571695199997	0.000160200058993	0.0160470121019	up	-	-	-	-	-	-	-	-	-
TRINITY_DN84046_c2_g1	0.0001	20.85985	-17.6703692581	1.68028415377e-15	2.8826405113300005e-12	down	-	KOG1208, KOG1208, KOG1208, Dehydrogenases with different specificities (related to short-chain alcohol dehydrogenases) [Secondary metabolites biosynthesis, transport and catabolism]. 8.79743e-06	gi|1021023918|gb|KZM81706.1| hypothetical protein DCAR_029319 [Daucus carota subsp. sativus] 6.9e-20	-	-	sp|Q6RVV4|TIC32_PEA Short-chain dehydrogenase TIC 32, chloroplastic OS=Pisum sativum GN=TIC32 PE=1 SV=1 6.51981e-13	tr|A0A061G5V3|A0A061G5V3_THECC NAD(P)-binding Rossmann-fold superfamily protein isoform 1 OS=Theobroma cacao GN=TCM_016274 PE=4 SV=1 1.9e-14	GO:0009706, chloroplast inner membrane;GO:0015031, protein transport;GO:0016491, oxidoreductase activity	-
TRINITY_DN93067_c0_g2	0.212193197885	7.980071766669999	-5.23295140627	0.000460809220691	0.0324599217739	down	PLN02681, PLN02681, proline dehydrogenase. 3.9616e-117	KOG0186, KOG0186, KOG0186, Proline oxidase [Amino acid transport and metabolism]. 5.22856e-66	gi|1021048913|gb|KZN06693.1| hypothetical protein DCAR_007530 [Daucus carota subsp. sativus] 7.4e-180	-	pfam01619, Pro_dh, Proline dehydrogenase. 7.97523e-10	sp|Q6NKX1|PROD2_ARATH Proline dehydrogenase 2, mitochondrial OS=Arabidopsis thaliana GN=POX2 PE=2 SV=1 2.17883e-127	tr|A0A103Y4Y7|A0A103Y4Y7_CYNCS Proline dehydrogenase OS=Cynara cardunculus var. scolymus GN=Ccrd_019090 PE=4 SV=1 3.0e-120	GO:0004657, proline dehydrogenase activity;GO:0005739, mitochondrion;GO:0006562, proline catabolic process;GO:0006970, response to osmotic stress;GO:0009414, response to water deprivation;GO:0010133, proline catabolic process to glutamate	K00318-ko00330 Arginine and proline metabolism
TRINITY_DN80470_c2_g3	0.779449833333	68.668939	-6.46105769086	0.0008441859274019999	0.047480430264499995	down	-	-	gi|1021026208|gb|KZM83995.1| hypothetical protein DCAR_028583 [Daucus carota subsp. sativus] 1.9e-15	-	-	-	-	-	-
TRINITY_DN79864_c0_g1	0.128251316667	5.9695956166699995	-5.540587663769999	0.000133267444419	0.013830579487999999	down	-	-	-	-	-	-	-	-	-
TRINITY_DN93361_c1_g1	112.14699716700001	0.0001	20.0969595609	4.06654207534e-17	1.86947500344e-13	up	-	-	gi|1021041281|gb|KZM99062.1| hypothetical protein DCAR_013576 [Daucus carota subsp. sativus] 2.3e-07	-	-	-	-	-	-
TRINITY_DN86639_c0_g1	0.235068401809	5.62544229824	-4.5808140038800005	5.21942066926e-05	0.007220088796720001	down	-	-	gi|1021048529|gb|KZN06309.1| hypothetical protein DCAR_007146 [Daucus carota subsp. sativus] 4.1e-45	-	-	-	tr|A0A0D2VB03|A0A0D2VB03_GOSRA Uncharacterized protein OS=Gossypium raimondii GN=B456_013G084000 PE=4 SV=1 1.3e-22	-	-
TRINITY_DN82832_c2_g1	6.405836333330001	0.07470800000000001	6.42198038782	0.0006684613609069999	0.0411473534117	up	cd07323, LAM, LA motif RNA-binding domain. This domain is found at the N-terminus of La RNA-binding proteins as well as in other related proteins. Typically, the domain co-occurs with an RNA-recognition motif (RRM), and together these domains function to bind primary transcripts of RNA polymerase III in the La autoantigen (Lupus La protein, LARP3, or Sjoegren syndrome type B antigen, SS-B). A var…	-	gi|1021031914|gb|KZM89698.1| hypothetical protein DCAR_022939 [Daucus carota subsp. sativus] 2.0e-09	-	pfam05383, La, La domain. This presumed domain is found at the N-terminus of La RNA-binding proteins as well as other proteins. The function of this region is uncertain. 2.22051e-06	-	tr|A0A0S3R475|A0A0S3R475_PHAAN Uncharacterized protein OS=Vigna angularis var. angularis GN=Vigan.01G320000 PE=4 SV=1 5.4e-07	-	-
TRINITY_DN88159_c0_g1	26.10850658	0.414143483333	5.978245439279999	1.0030970649800001e-07	6.34909560394e-05	up	PLN00412, PLN00412, NADP-dependent glyceraldehyde-3-phosphate dehydrogenase; Provisional. 0.0	KOG2450, KOG2450, KOG2450, Aldehyde dehydrogenase [Energy production and conversion]. 1.23078e-68	gi|1021038356|gb|KZM96139.1| hypothetical protein DCAR_019381 [Daucus carota subsp. sativus] 5.2e-276	gi|6425092|gb|AF196292.1|AF196292 Apium graveolens nonreversible glyceraldehyde-3-phosphate dehydrogenase mRNA, complete cds 0.0	pfam00171, Aldedh, Aldehyde dehydrogenase family. This family of dehydrogenases act on aldehyde substrates. Members use NADP as a cofactor. The family includes the following members: The prototypical members are the aldehyde dehydrogenases EC:1.2.1.3. Succinate-semialdehyde dehydrogenase EC:1.2.1.16. Lactaldehyde dehydrogenase EC:1.2.1.22. Benzaldehyde dehydrogenase EC:1.2.1.28. Methylmalonate-se…	sp|Q9SNX8|GAPN_APIGR NADP-dependent glyceraldehyde-3-phosphate dehydrogenase OS=Apium graveolens PE=1 SV=1 0.0	tr|W9QQL0|W9QQL0_9ROSA NADP-dependent glyceraldehyde-3-phosphate dehydrogenase OS=Morus notabilis GN=L484_003300 PE=3 SV=1 3.4e-259	GO:0005829, cytosol;GO:0008886, glyceraldehyde-3-phosphate dehydrogenase (NADP+) (non-phosphorylating) activity;GO:0016620, oxidoreductase activity, acting on the aldehyde or oxo group of donors, NAD or NADP as acceptor	K00131-ko00010 Glycolysis / Gluconeogenesis;ko00030 Pentose phosphate pathway;ko01200 Carbon metabolism
TRINITY_DN90317_c1_g1	28.285366999999997	417.402714833	-3.88331218893	0.000444023389202	0.0320000915649	down	-	-	-	-	-	-	-	-	-
TRINITY_DN82522_c0_g2	2.13458216667	6.215101666669999	-1.54182429364	0.000525168573187	0.0350434678092	down	cd14664, STK_BAK1_like, Catalytic domain of the Serine/Threonine Kinase, BRI1 associated kinase 1 and related STKs. STKs catalyze the transfer of the gamma-phosphoryl group from ATP to serine/threonine residues on protein substrates. This subfamily includes three leucine-rich repeat receptor-like kinases (LRR-RLKs): Arabidopsis thaliana BAK1 and CLAVATA1 (CLV1), and Physcomitrella patens CLL1B cl…	KOG1187, KOG1187, KOG1187, Serine/threonine protein kinase [Signal transduction mechanisms]. 2.67507e-86	gi|1021035056|gb|KZM92839.1| hypothetical protein DCAR_016084 [Daucus carota subsp. sativus] 2.9e-270	gi|1009111513|ref|XM_016045820.1| PREDICTED: Ziziphus jujuba tyrosine-sulfated glycopeptide receptor 1-like (LOC107434356), transcript variant X1, mRNA 0.0	pfam07714, Pkinase_Tyr, Protein tyrosine kinase. 2.99157e-15	sp|Q9C7S5|PSYR1_ARATH Tyrosine-sulfated glycopeptide receptor 1 OS=Arabidopsis thaliana GN=PSYR1 PE=2 SV=1 0.0	tr|B9RC79|B9RC79_RICCO Leucine-rich repeat receptor protein kinase EXS, putative OS=Ricinus communis GN=RCOM_1686080 PE=3 SV=1 4.5e-223	GO:0001653, peptide receptor activity;GO:0004674, protein serine/threonine kinase activity;GO:0004888, transmembrane signaling receptor activity;GO:0005524, ATP binding;GO:0005886, plasma membrane;GO:0009826, unidimensional cell growth;GO:0016021, integral component of membrane;GO:0032440, 2-alkenal reductase [NAD(P)] activity;GO:0045851, pH reduction	-
TRINITY_DN93895_c0_g1	20.4470946667	0.156927333333	7.02565539423	0.0008554884308060001	0.0479002230549	up	-	-	-	-	-	-	-	-	-
TRINITY_DN91239_c0_g1	0.433685333333	9.65771433333	-4.4769612314	5.64928776023e-05	0.00755663611016	down	-	-	-	gi|169616673|ref|XM_001801700.1| Phaeosphaeria nodorum SN15 hypothetical protein partial mRNA 3.01412e-162	-	-	-	-	-
TRINITY_DN70311_c0_g1	1.3057005333299998	7.931621333330001	-2.60279175492	0.000523028600744	0.034954077421	down	PTZ00169, PTZ00169, ADP/ATP transporter on adenylate translocase; Provisional. 1.87927e-68	KOG0749, KOG0749, KOG0749, Mitochondrial ADP/ATP carrier proteins [Energy production and conversion]. 2.25276e-78	gi|695010431|ref|XP_009391889.1| PREDICTED: ADP,ATP carrier protein 1, mitochondrial-like [Musa acuminata subsp. malaccensis] 4.9e-94	gi|597583676|ref|XM_007294833.1| Marssonina brunnea f. sp. 'multigermtubi' MB_m1 40S ribosomal protein S3aE (MBM_07006), mRNA 0.0	pfam00153, Mito_carr, Mitochondrial carrier protein. 1.15729e-07	sp|P02723|ADT_NEUCR ADP,ATP carrier protein OS=Neurospora crassa (strain ATCC 24698 / 74-OR23-1A / CBS 708.71 / DSM 1257 / FGSC 987) GN=aac PE=3 SV=1 6.05449e-131	tr|M0SDV6|M0SDV6_MUSAM Uncharacterized protein OS=Musa acuminata subsp. malaccensis PE=3 SV=1 3.7e-94	GO:0003735, structural constituent of ribosome;GO:0005215, transporter activity;GO:0005743, mitochondrial inner membrane;GO:0006412, translation;GO:0016021, integral component of membrane;GO:0055085, transmembrane transport	K05863-ko04022 cGMP - PKG signaling pathway;ko04020 Calcium signaling pathway
TRINITY_DN72902_c1_g3	6.116169666669999	20.4714745	-1.7429146854799997	0.000440831742769	0.0318931253958	down	cd14066, STKc_IRAK, Catalytic domain of the Serine/Threonine kinases, Interleukin-1 Receptor Associated Kinases and related STKs. STKs catalyze the transfer of the gamma-phosphoryl group from ATP to serine/threonine residues on protein substrates. IRAKs are involved in Toll-like receptor (TLR) and interleukin-1 (IL-1) signalling pathways, and are thus critical in regulating innate immune response…	KOG1187, KOG1187, KOG1187, Serine/threonine protein kinase [Signal transduction mechanisms]. 1.95281e-11	gi|1021026913|gb|KZM84700.1| hypothetical protein DCAR_027878 [Daucus carota subsp. sativus] 6.2e-30	gi|219817025|gb|FJ148089.1| Daucus carota subsp. sativus clone BAC C145G08 genomic sequence 1.49983e-57	-	sp|O81832|Y4729_ARATH G-type lectin S-receptor-like serine/threonine-protein kinase At4g27290 OS=Arabidopsis thaliana GN=At4g27290 PE=3 SV=4 5.65175e-27	tr|B9SSB2|B9SSB2_RICCO Putative uncharacterized protein OS=Ricinus communis GN=RCOM_1228290 PE=4 SV=1 4.6e-25	GO:0004674, protein serine/threonine kinase activity;GO:0005516, calmodulin binding;GO:0005524, ATP binding;GO:0005886, plasma membrane;GO:0006468, protein phosphorylation;GO:0006952, defense response;GO:0009506, plasmodesma;GO:0016021, integral component of membrane;GO:0030246, carbohydrate binding;GO:0048544, recognition of pollen	-
TRINITY_DN97392_c1_g1	1.56598616667	11.1181316667	-2.82777099887	0.0006752543142690001	0.0413533140965	down	-	-	gi|1021047496|gb|KZN05276.1| hypothetical protein DCAR_006113 [Daucus carota subsp. sativus] 6.5e-35	-	-	sp|Q9FF86|DCR_ARATH BAHD acyltransferase DCR OS=Arabidopsis thaliana GN=DCR PE=2 SV=1 5.98199e-08	tr|D1GJ95|D1GJ95_COFAR Hydroxycinnamoyl-CoA shikimate/quinate hydroxycinnamoyl transferase (Fragment) OS=Coffea arabica GN=hct-C PE=2 SV=1 1.4e-26	GO:0005737, cytoplasm;GO:0005829, cytosol;GO:0010090, trichome morphogenesis;GO:0010143, cutin biosynthetic process;GO:0016747, transferase activity, transferring acyl groups other than amino-acyl groups;GO:0051179, localization;GO:0090626, plant epidermis morphogenesis	-
TRINITY_DN72538_c0_g1	20.7604828333	0.63420725	5.03274181725	6.91375309724e-05	0.00868277516299	up	-	-	gi|823211721|ref|XP_012438646.1| PREDICTED: uncharacterized protein LOC105764565 [Gossypium raimondii] 2.7e-10	-	-	-	tr|A0A0D2PX83|A0A0D2PX83_GOSRA Uncharacterized protein OS=Gossypium raimondii GN=B456_008G186200 PE=4 SV=1 2.0e-10	-	-
TRINITY_DN81877_c2_g1	0.31172606666700003	19.06700375	-5.934655542740001	0.0008489574490980001	0.047595562455900006	down	cd09440, LIM1_SF3, The first Lim domain of pollen specific protein SF3. The first Lim domain of pollen specific protein SF3: SF3 is a Lim protein that is found exclusively in mature plant pollen grains. It contains two LIM domains. The exact function of SF3 is unknown. It may be a transcription factor required for the expression of late pollen genes. It is possible that SF3 protein is involved in…	KOG1700, KOG1700, KOG1700, Regulatory protein MLP and related LIM proteins [Signal transduction mechanisms, Cytoskeleton]. 1.46387e-07	gi|590562511|ref|XP_007009107.1| GATA type zinc finger transcription factor family protein isoform 2, partial [Theobroma cacao] 6.0e-12	gi|1027104865|ref|XM_016794566.1| PREDICTED: Prunus mume LIM domain-containing protein WLIM2b (LOC103332737), transcript variant X3, mRNA 6.17693e-24	-	sp|O80839|PLI2A_ARATH LIM domain-containing protein PLIM2a OS=Arabidopsis thaliana GN=PLIM2A PE=1 SV=1 1.52407e-12	tr|A0A061FMK3|A0A061FMK3_THECC GATA type zinc finger transcription factor family protein isoform 2 (Fragment) OS=Theobroma cacao GN=TCM_042613 PE=4 SV=1 4.5e-12	GO:0005737, cytoplasm;GO:0005856, cytoskeleton;GO:0008270, zinc ion binding;GO:0051015, actin filament binding;GO:0051017, actin filament bundle assembly	-
TRINITY_DN90706_c1_g1	2.04818268333	6.054705683330001	-1.5637124336100001	0.000189144684507	0.0180381231191	down	-	-	-	-	-	-	-	-	-
TRINITY_DN68951_c1_g5	0.0001	13.4644346667	-17.038794130899998	1.6831106515199998e-15	2.8826405113300005e-12	down	-	KOG1121, KOG1121, KOG1121, Tam3-transposase (Ac family) [Replication, recombination and repair]. 4.48681e-24	gi|566196968|ref|XP_006376750.1| hypothetical protein POPTR_0012s05700g [Populus trichocarpa] 2.5e-47	-	-	sp|P08770|TRA1_MAIZE Putative AC transposase OS=Zea mays PE=2 SV=2 4.448e-24	tr|U5FZ51|U5FZ51_POPTR Uncharacterized protein OS=Populus trichocarpa GN=POPTR_0012s05700g PE=4 SV=1 1.9e-47	GO:0000977, RNA polymerase II regulatory region sequence-specific DNA binding;GO:0003677, DNA binding;GO:0003700, DNA binding transcription factor activity;GO:0005634, nucleus;GO:0006310, DNA recombination;GO:0006357, regulation of transcription by RNA polymerase II;GO:0016021, integral component of membrane;GO:0032196, transposition	-
TRINITY_DN81058_c2_g3	306.891523333	23.301785	3.7192164177800007	0.000623513547929	0.0392953825274	up	-	-	gi|1021054193|gb|KZN11971.1| hypothetical protein DCAR_004627 [Daucus carota subsp. sativus] 2.0e-39	gi|802546958|ref|XM_012232406.1| PREDICTED: Jatropha curcas probable aquaporin PIP-type 7a (LOC105646538), mRNA 2.91983e-27	-	sp|Q39196|PIP14_ARATH Probable aquaporin PIP1-4 OS=Arabidopsis thaliana GN=PIP1.4 PE=1 SV=1 6.97343e-48	tr|D7KQ53|D7KQ53_ARALL Putative uncharacterized protein OS=Arabidopsis lyrata subsp. lyrata GN=ARALYDRAFT_470115 PE=3 SV=1 6.5e-38	GO:0005215, transporter activity;GO:0005773, vacuole;GO:0005886, plasma membrane;GO:0005887, integral component of plasma membrane;GO:0006833, water transport;GO:0009414, response to water deprivation;GO:0009506, plasmodesma;GO:0009992, cellular water homeostasis;GO:0015250, water channel activity;GO:0015254, glycerol channel activity;GO:0016020, membrane;GO:0016021, integral component of membran…	-
TRINITY_DN71096_c2_g1	0.04983218333330001	18.475376899999997	-8.53431029525	1.1742445744600001e-07	7.12523356176e-05	down	pfam16913, PUNUT, Purine nucleobase transmembrane transport. PUNUT is a family of largely plant and fungal purine transporters. Most members are 10-pass transmembrane proteins, and they belong to the drug/metabolite transporter (dmt) superfamily. The plant vascular system transports nucloebases and their derivatives such as cytokinins and caffeine by a common H+-coupled high-affinity purine trans…	-	gi|1021051334|gb|KZN09112.1| hypothetical protein DCAR_001768 [Daucus carota subsp. sativus] 2.3e-119	-	pfam16913, PUNUT, Purine nucleobase transmembrane transport. PUNUT is a family of largely plant and fungal purine transporters. Most members are 10-pass transmembrane proteins, and they belong to the drug/metabolite transporter (dmt) superfamily. The plant vascular system transports nucloebases and their derivatives such as cytokinins and caffeine by a common H+-coupled high-affinity purine trans…	sp|Q94GB1|PUP2_ARATH Purine permease 2 OS=Arabidopsis thaliana GN=PUP2 PE=1 SV=1 1.70802e-79	tr|A0A061E319|A0A061E319_THECC Purine permease 3 OS=Theobroma cacao GN=TCM_007408 PE=4 SV=1 5.3e-84	GO:0005215, transporter activity;GO:0005345, purine nucleobase transmembrane transporter activity;GO:0006863, purine nucleobase transport;GO:0016020, membrane;GO:0016021, integral component of membrane	-
TRINITY_DN72217_c1_g1	3.3693563341400004	17.4421609483	-2.37203387268	0.000725765601358	0.0432424611063	down	-	-	-	gi|663681407|emb|HG975524.1| Solanum lycopersicum chromosome ch12, complete genome 1.39465e-15	-	-	-	-	-
TRINITY_DN96075_c1_g1	0.26726	7.712484	-4.85087975629	2.52331779761e-05	0.00421423020398	down	pfam02309, AUX_IAA, AUX/IAA family. Transcription of the AUX/IAA family of genes is rapidly induced by the plant hormone auxin. Some members of this family are longer and contain an N terminal DNA binding domain. The function of this region is uncertain. 1.92374e-45	-	gi|1021037422|gb|KZM95205.1| hypothetical protein DCAR_018447 [Daucus carota subsp. sativus] 3.9e-80	gi|590618395|ref|XM_007023972.1| Theobroma cacao Indole-3-acetic acid inducible 19 (TCM_028602) mRNA, complete cds 3.05357e-14	pfam02309, AUX_IAA, AUX/IAA family. Transcription of the AUX/IAA family of genes is rapidly induced by the plant hormone auxin. Some members of this family are longer and contain an N terminal DNA binding domain. The function of this region is uncertain. 4.59598e-46	sp|O24542|AX22D_VIGRR Auxin-induced protein 22D OS=Vigna radiata var. radiata GN=AUX22D PE=2 SV=1 6.68437e-76	tr|Q9XEY4|Q9XEY4_TOBAC Auxin-responsive protein OS=Nicotiana tabacum PE=2 SV=1 2.4e-61	GO:0005634, nucleus;GO:0006351, transcription, DNA-templated;GO:0006355, regulation of transcription, DNA-templated;GO:0009734, auxin-activated signaling pathway	K14484-ko04075 Plant hormone signal transduction
TRINITY_DN71591_c0_g5	5.401816999999999	0.0001	15.7211571453	1.5740273991999997e-16	4.1662597344799996e-13	up	-	-	-	-	-	-	-	-	-
TRINITY_DN94354_c0_g1	14.335075355799999	221.300512717	-3.9483854000400003	0.00010434643475900001	0.011727936186200001	down	pfam03055, RPE65, Retinal pigment epithelial membrane protein. This family represents a retinal pigment epithelial membrane receptor which is abundantly expressed in retinal pigment epithelium, and binds plasma retinal binding protein. The family also includes the sequence related neoxanthin cleavage enzyme in plants and lignostilbene-alpha,beta-dioxygenase in bacteria. 3.78014e-18	KOG1285, KOG1285, KOG1285, Beta, beta-carotene 15,15'-dioxygenase and related enzymes [Secondary metabolites biosynthesis, transport and catabolism]. 5.02785e-17	gi|1021054036|gb|KZN11814.1| carotenoid cleavage dioxygenase [Daucus carota subsp. sativus] 1.9e-82	gi|1025321407|ref|XM_016648428.1| PREDICTED: Nicotiana tabacum carotenoid cleavage dioxygenase 8 homolog B, chloroplastic-like (LOC107821949), mRNA 3.82128e-103	pfam03055, RPE65, Retinal pigment epithelial membrane protein. This family represents a retinal pigment epithelial membrane receptor which is abundantly expressed in retinal pigment epithelium, and binds plasma retinal binding protein. The family also includes the sequence related neoxanthin cleavage enzyme in plants and lignostilbene-alpha,beta-dioxygenase in bacteria. 9.03107e-19	sp|Q8LIY8|CCD8B_ORYSJ Carotenoid cleavage dioxygenase 8 homolog B, chloroplastic OS=Oryza sativa subsp. japonica GN=CCD8B PE=1 SV=1 1.17642e-70	tr|A0A103XZQ1|A0A103XZQ1_CYNCS Carotenoid oxygenase OS=Cynara cardunculus var. scolymus GN=Ccrd_021895 PE=4 SV=1 7.8e-76	GO:0009507, chloroplast;GO:0010223, secondary shoot formation;GO:0016121, carotene catabolic process;GO:0016702, oxidoreductase activity, acting on single donors with incorporation of molecular oxygen, incorporation of two atoms of oxygen;GO:0046872, metal ion binding;GO:0102251, all-trans-beta-apo-10'-carotenal cleavage oxygenase activity;GO:1901601, strigolactone biosynthetic process	K17913-ko00906 Carotenoid biosynthesis
TRINITY_DN74244_c0_g2	0.17271038333299998	21.8804168833	-6.98514159538	3.03115753244e-05	0.00484626501467	down	pfam02365, NAM, No apical meristem (NAM) protein. This is a family of no apical meristem (NAM) proteins these are plant development proteins. Mutations in NAM result in the failure to develop a shoot apical meristem in petunia embryos. NAM is indicated as having a role in determining positions of meristems and primordial. One member of this family NAP (NAC-like, activated by AP3/PI) is encoded by…	-	gi|1021041775|gb|KZM99556.1| hypothetical protein DCAR_013082 [Daucus carota subsp. sativus] 5.4e-135	gi|590608667|ref|XM_007021265.1| Theobroma cacao NAC domain protein, IPR003441 (TCM_031363) mRNA, complete cds 3.73836e-61	pfam02365, NAM, No apical meristem (NAM) protein. This is a family of no apical meristem (NAM) proteins these are plant development proteins. Mutations in NAM result in the failure to develop a shoot apical meristem in petunia embryos. NAM is indicated as having a role in determining positions of meristems and primordial. One member of this family NAP (NAC-like, activated by AP3/PI) is encoded by…	sp|Q9LD44|NAC56_ARATH NAC transcription factor 56 OS=Arabidopsis thaliana GN=NAC056 PE=2 SV=1 1.56587e-58	tr|A0A0M5JAD3|A0A0M5JAD3_MANES NAC transcription factors 48 OS=Manihot esculenta PE=2 SV=1 4.8e-67	GO:0003677, DNA binding;GO:0003700, DNA binding transcription factor activity;GO:0005634, nucleus;GO:0006351, transcription, DNA-templated;GO:0006355, regulation of transcription, DNA-templated;GO:0009753, response to jasmonic acid;GO:0044212, transcription regulatory region DNA binding;GO:0045995, regulation of embryonic development;GO:0048317, seed morphogenesis;GO:0080060, integument developme…	-
TRINITY_DN88378_c0_g1	1.396031	14.0785192333	-3.3340927172900003	0.00022267278906400002	0.020239126021200003	down	-	-	gi|1021051891|gb|KZN09669.1| hypothetical protein DCAR_002325 [Daucus carota subsp. sativus] 5.1e-74	gi|731396005|ref|XM_010654059.1| PREDICTED: Vitis vinifera WAT1-related protein At2g39510-like (LOC104879815), mRNA 1.00088e-18	-	sp|Q9LV20|WTR17_ARATH WAT1-related protein At3g18200 OS=Arabidopsis thaliana GN=At3g18200 PE=2 SV=1 5.66595e-21	tr|A0A061EMV3|A0A061EMV3_THECC Nodulin MtN21 /EamA-like transporter family protein isoform 1 OS=Theobroma cacao GN=TCM_020864 PE=4 SV=1 6.4e-53	GO:0016021, integral component of membrane;GO:0022857, transmembrane transporter activity	-
TRINITY_DN90489_c0_g1	11.890398766199999	0.0001	16.8594375737	1.15329817717e-06	0.000428668663323	up	-	-	gi|1012337901|gb|KYP49165.1| hypothetical protein KK1_029099 [Cajanus cajan] 3.4e-09	-	-	-	tr|A0A0S3SR33|A0A0S3SR33_PHAAN Uncharacterized protein (Fragment) OS=Vigna angularis var. angularis GN=Vigan.08G199700 PE=4 SV=1 3.4e-09	-	-
TRINITY_DN74017_c0_g3	6.137939833330001	0.1128175	5.765691726109999	9.6897613773e-05	0.0110838536328	up	-	-	-	-	-	-	-	-	-
TRINITY_DN69166_c0_g1	0.149304083333	9.19489316667	-5.94450728485	1.5358935802600001e-06	0.000508165517255	down	cd00684, Terpene_cyclase_plant_C1, Plant Terpene Cyclases, Class 1. This CD includes a diverse group of monomeric plant terpene cyclases (Tspa-Tspf) that convert the acyclic isoprenoid diphosphates, geranyl diphosphate (GPP), farnesyl diphosphate (FPP), or geranylgeranyl diphosphate (GGPP) into cyclic monoterpenes, diterpenes, or sesquiterpenes, respectively; a few form acyclic species. Terpnoid …	-	gi|1021037189|gb|KZM94972.1| Terpene synthase like-13 [Daucus carota subsp. sativus] 2.0e-154	-	pfam03936, Terpene_synth_C, Terpene synthase family, metal binding domain. It has been suggested that this gene family be designated tps (for terpene synthase). It has been split into six subgroups on the basis of phylogeny, called tpsa-tpsf. tpsa includes vetispiridiene synthase, 5-epi- aristolochene synthase, and (+)-delta-cadinene synthase. tpsb includes (-)-limonene synthase. tpsc includes ka…	sp|B9T536|TPS10_RICCO Terpene synthase 10 OS=Ricinus communis GN=TPS10 PE=2 SV=1 7.05619e-106	tr|A0A059SVB0|A0A059SVB0_CORSA S-linalool synthase OS=Coriandrum sativum GN=LINS PE=2 SV=1 1.3e-89	GO:0000287, magnesium ion binding;GO:0008152, metabolic process;GO:0010333, terpene synthase activity;GO:0010334, sesquiterpene synthase activity;GO:0051762, sesquiterpene biosynthetic process	K18108-ko00902 Monoterpenoid biosynthesis
TRINITY_DN87663_c1_g2	3923.5421595	99.0777628	5.307451599649999	0.000202447586205	0.0190963167518	up	-	-	gi|1021033372|gb|KZM91156.1| hypothetical protein DCAR_021479 [Daucus carota subsp. sativus] 1.9e-06	-	-	-	tr|Q5KTS9|Q5KTS9_DAUCA Dehydrin protein OS=Daucus carota GN=CAISE1 PE=2 SV=1 5.4e-06	GO:0006950, response to stress;GO:0009415, response to water	-
TRINITY_DN77724_c1_g1	2.286661	14.3027707667	-2.64498025079	0.0007064119467339999	0.04240885344380001	down	-	-	gi|1021039485|gb|KZM97266.1| hypothetical protein DCAR_015372 [Daucus carota subsp. sativus] 8.0e-21	-	-	sp|Q9FNI8|FBD32_ARATH FBD-associated F-box protein At5g22730 OS=Arabidopsis thaliana GN=At5g22730 PE=2 SV=2 2.59157e-07	tr|A0A059B0Q4|A0A059B0Q4_EUCGR Uncharacterized protein OS=Eucalyptus grandis GN=EUGRSUZ_H02468 PE=4 SV=1 1.4e-09	-	-
TRINITY_DN94857_c1_g1	9.96964828364	0.294270900941	5.08232581595	7.1532452116199995e-06	0.00167510592359	up	-	-	gi|1021054106|gb|KZN11884.1| hypothetical protein DCAR_004540 [Daucus carota subsp. sativus] 3.9e-22	-	-	-	tr|M5WAX0|M5WAX0_PRUPE Uncharacterized protein OS=Prunus persica GN=PRUPE_ppa007274mg PE=4 SV=1 3.2e-08	GO:0016021, integral component of membrane	-
TRINITY_DN89051_c3_g1	11.532792866700001	0.0699646730273	7.364899561830001	9.62754031506e-05	0.0110649574197	up	-	-	-	-	-	-	-	-	-
TRINITY_DN91889_c7_g3	0.1827905	8.51764186667	-5.5421910739	1.87391135321e-05	0.00338502590831	down	-	-	-	-	-	-	-	-	-
TRINITY_DN96334_c0_g2	0.0001	18.2789702551	-17.479825273	2.17987866297e-06	0.000665754760751	down	-	-	-	-	-	-	-	-	-
TRINITY_DN80964_c2_g4	4.1868866666699995	45.266729999999995	-3.43450132032	0.000249606719394	0.021833926247400003	down	-	-	gi|1021032747|gb|KZM90531.1| hypothetical protein DCAR_022104 [Daucus carota subsp. sativus] 6.0e-13	-	-	-	tr|I1W6X3|I1W6X3_CAMSI Polyol transporter OS=Camellia sinensis PE=2 SV=1 2.0e-08	GO:0016021, integral component of membrane	-
TRINITY_DN97717_c2_g1	7.318304955	450.21519246699995	-5.94296139671	1.03774224714e-05	0.00220008912768	down	-	-	-	-	-	-	-	-	-
TRINITY_DN88982_c0_g2	7.829401333330001	0.020252166666700003	8.59468192523	1.18427651091e-06	0.00042984824649300004	up	pfam14543, TAXi_N, Xylanase inhibitor N-terminal. The N- and C-termini of the members of this family are jointly necessary for creating the catalytic pocket necessary for cleaving xylanase. Phytopathogens produce xylanase that destroys plant cells, so its destruction through proteolysis is vital for plant-survival. 9.67592e-06	-	gi|1021027631|gb|KZM85418.1| hypothetical protein DCAR_027160 [Daucus carota subsp. sativus] 1.6e-43	gi|969995818|ref|XM_015225006.1| PREDICTED: Solanum pennellii basic 7S globulin-like (LOC107024082), mRNA 3.41887e-20	pfam14543, TAXi_N, Xylanase inhibitor N-terminal. The N- and C-termini of the members of this family are jointly necessary for creating the catalytic pocket necessary for cleaving xylanase. Phytopathogens produce xylanase that destroys plant cells, so its destruction through proteolysis is vital for plant-survival. 2.31166e-06	sp|P13917|7SB1_SOYBN Basic 7S globulin OS=Glycine max GN=BG PE=1 SV=2 3.94185e-16	tr|D6QUQ0|D6QUQ0_SOLME Xyloglucan specific endoglucanase inhibitor OS=Solanum melongena PE=2 SV=1 7.8e-30	GO:0004190, aspartic-type endopeptidase activity;GO:0006508, proteolysis;GO:0030163, protein catabolic process;GO:0042802, identical protein binding;GO:0045735, nutrient reservoir activity	-
TRINITY_DN80680_c1_g1	264.060961167	4.251766	5.95666501972	3.49851937988e-05	0.0054085871199	up	-	-	-	-	-	-	-	-	-
TRINITY_DN79919_c3_g8	12.895873	0.36127333333300005	5.15767486194	0.000340281512297	0.0266331265723	up	-	-	-	-	-	-	-	-	-
TRINITY_DN92611_c2_g2	374.21783825	28.20285385	3.7299652691400005	0.000481436286349	0.0333481485359	up	PLN00027, PLN00027, aquaporin TIP; Provisional. 2.31094e-108	KOG0223, KOG0223, KOG0223, Aquaporin (major intrinsic protein family) [Carbohydrate transport and metabolism]. 1.29899e-50	gi|78173121|gb|ABB29477.1| tonoplast intrinsic protein [Panax ginseng] 6.9e-106	gi|78173120|gb|DQ237285.1| Panax ginseng tonoplast intrinsic protein (TIP1) mRNA, complete cds 0.0	pfam00230, MIP, Major intrinsic protein. MIP (Major Intrinsic Protein) family proteins exhibit essentially two distinct types of channel properties: (1) specific water transport by the aquaporins, and (2) small neutral solutes transport, such as glycerol by the glycerol facilitators. 4.04705e-51	sp|P25818|TIP11_ARATH Aquaporin TIP1-1 OS=Arabidopsis thaliana GN=TIP1-1 PE=1 SV=1 3.58929e-116	tr|Q307T0|Q307T0_PANGI Tonoplast intrinsic protein OS=Panax ginseng GN=TIP1 PE=2 SV=1 5.3e-106	GO:0000326, protein storage vacuole;GO:0005215, transporter activity;GO:0005773, vacuole;GO:0005774, vacuolar membrane;GO:0005887, integral component of plasma membrane;GO:0006833, water transport;GO:0009705, plant-type vacuole membrane;GO:0009941, chloroplast envelope;GO:0009992, cellular water homeostasis;GO:0015204, urea transmembrane transporter activity;GO:0015250, water channel activity;GO:…	-
TRINITY_DN76211_c0_g1	6.021507499999999	61.2939333	-3.34754766735	0.00036697619761	0.028005343464200003	down	-	-	-	-	-	-	-	-	-
TRINITY_DN97484_c2_g1	7.757476	0.166183167414	5.5447411634	6.32767109987e-05	0.0082003425454	up	pfam03469, XH, XH domain. The XH (rice gene X Homology) domain is found in a family of plant proteins including gene X. The molecular function of these proteins is unknown. However these proteins usually contain an XS domain that is also found in the PTGS protein SGS3. This domain contains a conserved glutamate residue that may be functionally important. 4.93844e-16	-	gi|1021027277|gb|KZM85064.1| hypothetical protein DCAR_027514 [Daucus carota subsp. sativus] 3.1e-16	-	pfam03469, XH, XH domain. The XH (rice gene X Homology) domain is found in a family of plant proteins including gene X. The molecular function of these proteins is unknown. However these proteins usually contain an XS domain that is also found in the PTGS protein SGS3. This domain contains a conserved glutamate residue that may be functionally important. 1.17984e-16	sp|Q9S9P3|FDM1_ARATH Factor of DNA methylation 1 OS=Arabidopsis thaliana GN=FDM1 PE=1 SV=1 2.13461e-13	tr|A0A0J8CDN8|A0A0J8CDN8_BETVU Uncharacterized protein OS=Beta vulgaris subsp. vulgaris GN=BVRB_5g118560 PE=4 SV=1 8.4e-14	GO:0003676, nucleic acid binding;GO:0003677, DNA binding;GO:0003723, RNA binding;GO:0003725, double-stranded RNA binding;GO:0004526, ribonuclease P activity;GO:0005655, nucleolar ribonuclease P complex;GO:0008270, zinc ion binding;GO:0009506, plasmodesma;GO:0031047, gene silencing by RNA;GO:0043621, protein self-association;GO:0080188, RNA-directed DNA methylation;GO:0090502, RNA phosphodiester b…	-
TRINITY_DN87576_c0_g1	2.60727883333	60.5534168333	-4.53759158473	2.49588580674e-05	0.0041764011027	down	PLN00411, PLN00411, nodulin MtN21 family protein; Provisional. 4.46235e-16	-	gi|1021035860|gb|KZM93643.1| hypothetical protein DCAR_016888 [Daucus carota subsp. sativus] 2.1e-105	gi|697132106|ref|XM_009621801.1| PREDICTED: Nicotiana tomentosiformis WAT1-related protein At5g07050-like (LOC104111977), mRNA 5.99136e-101	-	sp|Q9FL41|WTR38_ARATH WAT1-related protein At5g07050 OS=Arabidopsis thaliana GN=At5g07050 PE=2 SV=1 3.0429e-102	tr|D7TQV4|D7TQV4_VITVI Putative uncharacterized protein OS=Vitis vinifera GN=VIT_08s0040g00800 PE=4 SV=1 3.5e-92	GO:0005886, plasma membrane;GO:0006810, transport;GO:0016021, integral component of membrane;GO:0022857, transmembrane transporter activity	-
TRINITY_DN87576_c0_g4	3.59769716667	77.4574408333	-4.42825817692	0.00021047233582099998	0.0195922528347	down	-	-	gi|413949289|gb|AFW81938.1| hypothetical protein ZEAMMB73_476289 [Zea mays] 8.8e-12	gi|590568402|ref|XM_007010720.1| Theobroma cacao Nodulin MtN21 /EamA-like transporter family protein (TCM_044732) mRNA, complete cds 1.11842e-19	-	sp|Q9FL41|WTR38_ARATH WAT1-related protein At5g07050 OS=Arabidopsis thaliana GN=At5g07050 PE=2 SV=1 2.37022e-13	tr|K7V3J3|K7V3J3_MAIZE Uncharacterized protein OS=Zea mays GN=ZEAMMB73_476289 PE=4 SV=1 6.7e-12	GO:0005886, plasma membrane;GO:0006810, transport;GO:0016021, integral component of membrane;GO:0022857, transmembrane transporter activity	-
TRINITY_DN86879_c0_g3	29.9077173333	447.75093	-3.9041067207699998	0.000491539790563	0.033886760920599994	down	pfam00230, MIP, Major intrinsic protein. MIP (Major Intrinsic Protein) family proteins exhibit essentially two distinct types of channel properties: (1) specific water transport by the aquaporins, and (2) small neutral solutes transport, such as glycerol by the glycerol facilitators. 2.10967e-19	KOG0223, KOG0223, KOG0223, Aquaporin (major intrinsic protein family) [Carbohydrate transport and metabolism]. 3.6116e-17	gi|1021027241|gb|KZM85028.1| hypothetical protein DCAR_027550 [Daucus carota subsp. sativus] 2.0e-34	gi|444300793|gb|KC008718.1| Camellia sinensis aquaporin protein 3 mRNA, complete cds 1.68489e-48	pfam00230, MIP, Major intrinsic protein. MIP (Major Intrinsic Protein) family proteins exhibit essentially two distinct types of channel properties: (1) specific water transport by the aquaporins, and (2) small neutral solutes transport, such as glycerol by the glycerol facilitators. 5.04018e-20	sp|Q06611|PIP12_ARATH Aquaporin PIP1-2 OS=Arabidopsis thaliana GN=PIP1-2 PE=1 SV=1 2.42806e-41	tr|M1EZY6|M1EZY6_9ROSI Plasma intrinsic protein PIP1.1 OS=Helianthemum almeriense GN=PIP1.1 PE=2 SV=1 2.2e-33	GO:0005215, transporter activity;GO:0005887, integral component of plasma membrane;GO:0009506, plasmodesma;GO:0009992, cellular water homeostasis;GO:0015254, glycerol channel activity;GO:0016021, integral component of membrane;GO:0034220, ion transmembrane transport	-
TRINITY_DN88175_c0_g6	0.38492395666699997	9.41817433333	-4.61280205897	0.000450724658486	0.0321363102644	down	cd05329, TR_SDR_c, tropinone reductase-I and II (TR-1, and TR-II)-like, classical (c) SDRs. This subgroup includes TR-I and TR-II; these proteins are members of the SDR family. TRs catalyze the NADPH-dependent reductions of the 3-carbonyl group of tropinone, to a beta-hydroxyl group. TR-I and TR-II produce different stereoisomers from tropinone, TR-I produces tropine (3alpha-hydroxytropane), and …	-	gi|1021026030|gb|KZM83817.1| hypothetical protein DCAR_028761 [Daucus carota subsp. sativus] 2.4e-27	-	-	sp|P50165|TRNH_DATST Tropinone reductase homolog OS=Datura stramonium PE=2 SV=1 2.76073e-25	tr|A0A072UZ65|A0A072UZ65_MEDTR NAD(P)-binding rossmann-fold protein OS=Medicago truncatula GN=MTR_3g068065 PE=4 SV=1 3.7e-20	GO:0016491, oxidoreductase activity	-
TRINITY_DN73260_c1_g4	0.14561215	5.88122816667	-5.33591481667	1.72307703449e-08	1.36823281574e-05	down	-	-	-	gi|169616673|ref|XM_001801700.1| Phaeosphaeria nodorum SN15 hypothetical protein partial mRNA 0.0	-	-	-	-	-
TRINITY_DN69591_c0_g1	0.0001	5.18101876667	-15.6609481889	3.56595313153e-05	0.00548372021444	down	-	-	-	-	-	-	-	-	-
TRINITY_DN95449_c1_g5	6.880884416669999	0.858550033333	3.0026198928400003	0.00013309617707200002	0.013830579487999999	up	PLN02636, PLN02636, acyl-coenzyme A oxidase. 0.0	KOG0135, KOG0135, KOG0135, Pristanoyl-CoA/acyl-CoA oxidase [Lipid transport and metabolism, Secondary metabolites biosynthesis, transport and catabolism]. 6.88351e-143	gi|1021040620|gb|KZM98401.1| hypothetical protein DCAR_014237 [Daucus carota subsp. sativus] 1.9e-233	gi|731437615|ref|XM_002269614.3| PREDICTED: Vitis vinifera acyl-coenzyme A oxidase, peroxisomal (LOC100255430), mRNA 0.0	-	sp|O65201|ACOX2_ARATH Acyl-coenzyme A oxidase 2, peroxisomal OS=Arabidopsis thaliana GN=ACX2 PE=1 SV=2 0.0	tr|Q9SDY4|Q9SDY4_PETCR Acyl-coenzyme A oxidase OS=Petroselinum crispum GN=ACO PE=3 SV=1 5.9e-219	GO:0000062, fatty-acyl-CoA binding;GO:0001676, long-chain fatty acid metabolic process;GO:0003995, acyl-CoA dehydrogenase activity;GO:0003997, acyl-CoA oxidase activity;GO:0005777, peroxisome;GO:0006635, fatty acid beta-oxidation;GO:0009055, electron transfer activity;GO:0033539, fatty acid beta-oxidation using acyl-CoA dehydrogenase;GO:0050660, flavin adenine dinucleotide binding;GO:0052890, oxi…	K00232-ko00071 Fatty acid degradation;ko01040 Biosynthesis of unsaturated fatty acids;ko04024 cAMP signaling pathway;ko03320 PPAR signaling pathway;ko01212 Fatty acid metabolism;ko04146 Peroxisome;ko00592 alpha-Linolenic acid metabolism
TRINITY_DN69863_c1_g1	875.4271828999999	10.8813237833	6.330061196259999	1.25117581983e-06	0.0004442538794090001	up	-	-	gi|22653807|sp|P83442.1|LEAD3_DAUCA RecName: Full=Late embryogenesis abundant protein Dc3 [Daucus carota] 7.6e-07	-	-	sp|P83442|LEAD3_DAUCA Late embryogenesis abundant protein Dc3 OS=Daucus carota PE=2 SV=1 2.9157e-09	tr|Q9FUG0|Q9FUG0_DAUCA Lea1P OS=Daucus carota PE=2 SV=1 2.2e-06	-	-
TRINITY_DN69856_c2_g1	54.5118548333	0.6347375	6.4242661214900005	0.0006180050874040001	0.0390882623965	up	-	-	gi|1021023071|gb|KZM80875.1| hypothetical protein DCAR_031555 [Daucus carota subsp. sativus] 1.2e-16	-	-	-	-	-	-
TRINITY_DN67468_c1_g4	0.661803333333	24.7378	-5.224170834840001	0.000215833754961	0.0198254155882	down	pfam04119, HSP9_HSP12, Heat shock protein 9/12. These heat shock proteins (Hsp9 and Hsp12) are strongly expressed, an increase of 100 fold, upon entry into stationary phase in yeast. 4.35626e-17	-	-	gi|992077751|ref|XM_015555244.1| Aspergillus nomius NRRL 13137 heat shock protein hsp9 mRNA 1.13015e-15	pfam04119, HSP9_HSP12, Heat shock protein 9/12. These heat shock proteins (Hsp9 and Hsp12) are strongly expressed, an increase of 100 fold, upon entry into stationary phase in yeast. 1.04075e-17	sp|P22943|HSP12_YEAST 12 kDa heat shock protein OS=Saccharomyces cerevisiae (strain ATCC 204508 / S288c) GN=HSP12 PE=1 SV=1 9.20589e-11	tr|A0A0D6R409|A0A0D6R409_ARACU Uncharacterized protein OS=Araucaria cunninghamii PE=4 SV=1 1.4e-06	GO:0005768, endosome;GO:0005829, cytosol;GO:0005886, plasma membrane;GO:0006950, response to stress;GO:0007009, plasma membrane organization;GO:0007155, cell adhesion;GO:0008289, lipid binding;GO:0034599, cellular response to oxidative stress;GO:0034605, cellular response to heat;GO:0071470, cellular response to osmotic stress	-
TRINITY_DN67468_c1_g6	0.019773666666700003	5.15311048333	-8.025719296739998	7.30605114725e-05	0.00902633167693	down	pfam04119, HSP9_HSP12, Heat shock protein 9/12. These heat shock proteins (Hsp9 and Hsp12) are strongly expressed, an increase of 100 fold, upon entry into stationary phase in yeast. 3.72256e-14	-	-	-	pfam04119, HSP9_HSP12, Heat shock protein 9/12. These heat shock proteins (Hsp9 and Hsp12) are strongly expressed, an increase of 100 fold, upon entry into stationary phase in yeast. 8.8935e-15	sp|P50519|HSP9_SCHPO Heat shock protein hsp9 OS=Schizosaccharomyces pombe (strain 972 / ATCC 24843) GN=hsp9 PE=2 SV=1 5.39957e-12	tr|A0A0D6R811|A0A0D6R811_ARACU Uncharacterized protein OS=Araucaria cunninghamii PE=4 SV=1 1.9e-07	GO:0005634, nucleus;GO:0005737, cytoplasm;GO:0005829, cytosol;GO:0005886, plasma membrane;GO:0006950, response to stress;GO:0008289, lipid binding;GO:0010972, negative regulation of G2/M transition of mitotic cell cycle	-
TRINITY_DN69633_c5_g4	0.24759283333299997	15.7171685	-5.9882279686699995	0.000499602131362	0.0342863920306	down	-	-	-	gi|113200887|gb|DQ898156.1| Daucus carota chloroplast, complete genome 1.95181e-33	-	-	-	-	-
TRINITY_DN82080_c0_g5	0.0964581316667	7.218852833330001	-6.2257229164100005	0.00012679548274200001	0.0134244909467	down	-	-	-	-	-	-	-	-	-
TRINITY_DN92703_c1_g5	0.0926795	11.495805	-6.95464151878	6.31354184718e-05	0.00819418929756	down	-	-	-	-	-	-	-	-	-
TRINITY_DN69563_c0_g1	7.48158915	0.18900525	5.30684652888	1.48457220017e-06	0.000494934839573	up	pfam03469, XH, XH domain. The XH (rice gene X Homology) domain is found in a family of plant proteins including gene X. The molecular function of these proteins is unknown. However these proteins usually contain an XS domain that is also found in the PTGS protein SGS3. This domain contains a conserved glutamate residue that may be functionally important. 2.55518e-22	-	gi|1021031296|gb|KZM89081.1| hypothetical protein DCAR_026156 [Daucus carota subsp. sativus] 1.2e-32	-	pfam03469, XH, XH domain. The XH (rice gene X Homology) domain is found in a family of plant proteins including gene X. The molecular function of these proteins is unknown. However these proteins usually contain an XS domain that is also found in the PTGS protein SGS3. This domain contains a conserved glutamate residue that may be functionally important. 6.10453e-23	sp|Q9LHB1|FDM3_ARATH Factor of DNA methylation 3 OS=Arabidopsis thaliana GN=FDM3 PE=2 SV=1 5.25496e-25	tr|M5X7Q3|M5X7Q3_PRUPE Uncharacterized protein OS=Prunus persica GN=PRUPE_ppa002712mg PE=4 SV=1 2.9e-28	GO:0004526, ribonuclease P activity;GO:0005655, nucleolar ribonuclease P complex;GO:0031047, gene silencing by RNA;GO:0090502, RNA phosphodiester bond hydrolysis, endonucleolytic	-
TRINITY_DN72889_c1_g2	0.0217551666667	15.2270973333	-9.45106716941	6.67569419904e-08	4.66481488963e-05	down	-	-	gi|695081383|ref|XP_009388207.1| PREDICTED: uncharacterized protein LOC103975022 [Musa acuminata subsp. malaccensis] 2.2e-17	gi|1001822565|dbj|LC120363.1| Wickerhamomyces anomalus genes for 18S rRNA, ITS1, 5.8S rRNA, ITS2, 26S rRNA, partial and complete sequence, strain: DBL01s1Shirosato 0.0	-	sp|Q8TGM6|TAR1_YEAST Protein TAR1 OS=Saccharomyces cerevisiae (strain ATCC 204508 / S288c) GN=TAR1 PE=2 SV=1 3.45059e-48	tr|M0UBY5|M0UBY5_MUSAM Uncharacterized protein OS=Musa acuminata subsp. malaccensis PE=4 SV=1 1.7e-17	GO:0005739, mitochondrion;GO:0043457, regulation of cellular respiration	-
TRINITY_DN88631_c0_g3	0.0161882666667	8.349271666669999	-9.01055802241	0.00035051612249600004	0.027142315382599997	down	TIGR03389, laccase_11, laccase, plant. Members of this protein family include the copper-containing enzyme laccase (EC 1.10.3.2), often several from a single plant species, and additional, uncharacterized, closely related plant proteins termed laccase-like multicopper oxidases. This protein family shows considerable sequence similarity to the L-ascorbate oxidase (EC 1.10.3.3) family. Laccases are…	KOG1263, KOG1263, KOG1263, Multicopper oxidases [Secondary metabolites biosynthesis, transport and catabolism]. 7.32496e-52	gi|1021045249|gb|KZN03030.1| hypothetical protein DCAR_011786 [Daucus carota subsp. sativus] 1.2e-93	gi|1029050891|ref|XM_016833639.1| PREDICTED: Gossypium hirsutum laccase-4-like (LOC107906601), mRNA 3.04369e-46	pfam07732, Cu-oxidase_3, Multicopper oxidase. This entry contains many divergent copper oxidase-like domains that are not recognized by the pfam00394 model. 5.57697e-28	sp|Q0IQU1|LAC22_ORYSJ Laccase-22 OS=Oryza sativa subsp. japonica GN=LAC22 PE=2 SV=2 7.39013e-93	tr|A0A0B0PZF6|A0A0B0PZF6_GOSAR Laccase OS=Gossypium arboreum GN=F383_10334 PE=3 SV=1 6.5e-84	GO:0005507, copper ion binding;GO:0009809, lignin biosynthetic process;GO:0016021, integral component of membrane;GO:0016722, oxidoreductase activity, oxidizing metal ions;GO:0046274, lignin catabolic process;GO:0048046, apoplast;GO:0052716, hydroquinone:oxygen oxidoreductase activity	-
TRINITY_DN88350_c5_g3	15.250008333299998	271.833966833	-4.155843802230001	0.00018142870447999997	0.0174721643332	down	-	-	-	-	-	-	-	-	-
TRINITY_DN70332_c2_g9	0.149185466667	5.53789438333	-5.2141586361800005	0.00026721636293	0.0228550892962	down	cd10233, HSPA1-2_6-8-like_NBD, Nucleotide-binding domain of HSPA1-A, -B, -L, HSPA-2, -6, -7, -8, and similar proteins. This subfamily includes human HSPA1A (70-kDa heat shock protein 1A, also known as HSP72; HSPA1; HSP70I; HSPA1B; HSP70-1; HSP70-1A), HSPA1B (70-kDa heat shock protein 1B, also known as HSPA1A; HSP70-2; HSP70-1B), and HSPA1L (70-kDa heat shock protein 1-like, also known as HSP70T; …	KOG0101, KOG0101, KOG0101, Molecular chaperones HSP70/HSC70, HSP70 superfamily [Posttranslational modification, protein turnover, chaperones]. 1.18935e-94	gi|38325813|gb|AAR17079.1| heat shock protein 70-2 [Nicotiana tabacum] 2.1e-87	gi|636754740|ref|XM_008081353.1| Glarea lozoyensis ATCC 20868 Actin-like ATPase mRNA 9.20489e-177	pfam00012, HSP70, Hsp70 protein. Hsp70 chaperones help to fold many proteins. Hsp70 assisted folding involves repeated cycles of substrate binding and release. Hsp70 activity is ATP dependent. Hsp70 proteins are made up of two regions: the amino terminus is the ATPase domain and the carboxyl terminus is the substrate binding region. 6.48279e-74	sp|Q96W30|HSP72_PARBA Heat shock 70 kDa protein 2 OS=Paracoccidioides lutzii (strain ATCC MYA-826 / Pb01) GN=HSP70-2 PE=2 SV=2 2.0259e-117	tr|Q67BD1|Q67BD1_TOBAC Heat shock protein 70-2 OS=Nicotiana tabacum GN=HSP70-2 PE=3 SV=1 1.6e-87	GO:0005524, ATP binding	-
TRINITY_DN94115_c0_g1	0.392704761833	10.1803287562	-4.69619524945	0.00023192432621799998	0.0207560390596	down	pfam09265, Cytokin-bind, Cytokinin dehydrogenase 1, FAD and cytokinin binding. Members of this family adopt an alpha+beta sandwich structure with an antiparallel beta-sheet, in a ferredoxin-like fold. They are predominantly found in plant cytokinin dehydrogenase 1, where they are capable of binding both FAD and cytokinin substrates. The substrate displays a 'plug-into-socket' binding mode that se…	KOG1231, KOG1231, KOG1231, Proteins containing the FAD binding domain [Energy production and conversion]. 4.73894e-44	gi|1021022537|gb|KZM80485.1| hypothetical protein DCAR_032233 [Daucus carota subsp. sativus] 4.0e-72	gi|1025177241|ref|XM_016616421.1| PREDICTED: Nicotiana tabacum cytokinin dehydrogenase 3-like (LOC107793972), mRNA 1.84818e-60	pfam09265, Cytokin-bind, Cytokinin dehydrogenase 1, FAD and cytokinin binding. Members of this family adopt an alpha+beta sandwich structure with an antiparallel beta-sheet, in a ferredoxin-like fold. They are predominantly found in plant cytokinin dehydrogenase 1, where they are capable of binding both FAD and cytokinin substrates. The substrate displays a 'plug-into-socket' binding mode that se…	sp|Q9LTS3|CKX3_ARATH Cytokinin dehydrogenase 3 OS=Arabidopsis thaliana GN=CKX3 PE=1 SV=1 1.50447e-63	tr|A0A061GLZ5|A0A061GLZ5_THECC Cytokinin oxidase OS=Theobroma cacao GN=TCM_037648 PE=4 SV=1 4.9e-70	GO:0005773, vacuole;GO:0005783, endoplasmic reticulum;GO:0008131, primary amine oxidase activity;GO:0009690, cytokinin metabolic process;GO:0009823, cytokinin catabolic process;GO:0016614, oxidoreductase activity, acting on CH-OH group of donors;GO:0019139, cytokinin dehydrogenase activity;GO:0050660, flavin adenine dinucleotide binding	K00279-ko00908 Zeatin biosynthesis
TRINITY_DN68224_c1_g5	13.149293916600001	219.34011082599997	-4.060112424750001	4.42908171898e-05	0.00637397824592	down	cd05472, cnd41_like, Chloroplast Nucleoids DNA-binding Protease, catalyzes the degradation of ribulose-1,5-bisphosphate carboxylase/oxygenase. Chloroplast Nucleoids DNA-binding Protease catalyzes the degradation of ribulose-1,5-bisphosphate carboxylase/oxygenase (Rubisco) in senescent leaves of tobacco. Antisense tobacco with reduced amount of CND41 maintained green leaves and constant protein le…	KOG1339, KOG1339, KOG1339, Aspartyl protease [Posttranslational modification, protein turnover, chaperones]. 1.70191e-50	gi|1021050232|gb|KZN08010.1| hypothetical protein DCAR_000679 [Daucus carota subsp. sativus] 6.6e-231	-	pfam14541, TAXi_C, Xylanase inhibitor C-terminal. The N- and C-termini of the members of this family are jointly necessary for creating the catalytic pocket necessary for cleaving xylasnase. Phytopathogens produce xylanase that destroys plant cells, so its destruction through proteolysis is vital for plant-survival. 2.17129e-13	sp|Q8S9J6|ASPA_ARATH Aspartyl protease family protein At5g10770 OS=Arabidopsis thaliana GN=At5g10770 PE=2 SV=1 3.53229e-166	tr|B9IL97|B9IL97_POPTR Nucleoid DNA-binding family protein OS=Populus trichocarpa GN=POPTR_0018s02960g PE=3 SV=1 1.3e-149	GO:0003677, DNA binding;GO:0004190, aspartic-type endopeptidase activity;GO:0005886, plasma membrane;GO:0006508, proteolysis;GO:0030163, protein catabolic process;GO:0031225, anchored component of membrane	-
TRINITY_DN88455_c3_g11	0.0001	5.5519050000000005	-15.7606952614	1.2639672337e-06	0.00044517639500699996	down	-	-	-	-	-	-	-	-	-
TRINITY_DN74036_c1_g2	6.86234416667	0.160001173233	5.42254709405	0.000441064285025	0.0318931253958	up	-	-	-	-	-	-	-	-	-
TRINITY_DN85505_c0_g2	7.02805208333	57.5318338333	-3.03316366902	0.000395766911696	0.029622152901300002	down	-	-	gi|1021025038|gb|KZM82826.1| hypothetical protein DCAR_030395 [Daucus carota subsp. sativus] 3.1e-15	-	-	-	-	-	-
TRINITY_DN98985_c3_g2	1.61241175	9.29428886667	-2.5271242829599996	0.00021244796275599997	0.0196783586456	down	pfam03124, EXS, EXS family. We have named this region the EXS family after (ERD1, XPR1, and SYG1). This family includes C-terminus portions from the SYG1 G-protein associated signal transduction protein from Saccharomyces cerevisiae, and sequences that are thought to be murine leukaemia virus (MLV) receptors (XPR1). N-terminus portions from these proteins are aligned in the SPX pfam03105 family. …	KOG1162, KOG1162, KOG1162, Predicted small molecule transporter [Intracellular trafficking, secretion, and vesicular transport]. 7.70351e-28	gi|5734704|gb|AAD49969.1|AC008075_2 Contains similarity to gb|AF114753 polytropic murine leukamia virus receptor SYG1 from Mus musculus. EST gb|N96331 comes from this gene [Arabidopsis thaliana] 2.3e-70	gi|971552650|ref|XM_006348527.2| PREDICTED: Solanum tuberosum phosphate transporter PHO1 homolog 1 (LOC102592339), mRNA 2.86918e-89	pfam03124, EXS, EXS family. We have named this region the EXS family after (ERD1, XPR1, and SYG1). This family includes C-terminus portions from the SYG1 G-protein associated signal transduction protein from Saccharomyces cerevisiae, and sequences that are thought to be murine leukaemia virus (MLV) receptors (XPR1). N-terminus portions from these proteins are aligned in the SPX pfam03105 family. …	sp|Q93ZF5|PHO11_ARATH Phosphate transporter PHO1 homolog 1 OS=Arabidopsis thaliana GN=PHO1-H1 PE=2 SV=1 7.80701e-81	tr|A0A124SDN1|A0A124SDN1_CYNCS Uncharacterized protein OS=Cynara cardunculus var. scolymus GN=Ccrd_000381 PE=4 SV=1 2.7e-63	GO:0005802, trans-Golgi network;GO:0005886, plasma membrane;GO:0006817, phosphate ion transport;GO:0016021, integral component of membrane;GO:0016036, cellular response to phosphate starvation	-
TRINITY_DN66539_c1_g1	0.026125733333299997	5.27974333333	-7.65885245332	2.71261099151e-12	2.99922066172e-09	down	-	-	-	-	-	-	-	-	-
TRINITY_DN98725_c1_g1	1.8466732666699999	8.903815	-2.26949498549	0.000223146947118	0.0202611396985	down	-	-	-	-	-	-	-	-	-
TRINITY_DN70792_c1_g1	0.517782	6.195657016669999	-3.5808405627999997	0.0007801241340760001	0.0451530771223	down	PTZ00173, PTZ00173, 60S ribosomal protein L10; Provisional. 2.03916e-79	KOG0857, KOG0857, KOG0857, 60s ribosomal protein L10 [Translation, ribosomal structure and biogenesis]. 9.79672e-76	gi|258598734|gb|ACV83439.1| QM-like protein [Zea mays] 3.0e-54	gi|169600622|ref|XM_001793682.1| Phaeosphaeria nodorum SN15 hypothetical protein partial mRNA 1.51245e-148	pfam00252, Ribosomal_L16, Ribosomal protein L16p/L10e. 1.63382e-06	sp|Q9P769|RL10B_SCHPO 60S ribosomal protein L10-B OS=Schizosaccharomyces pombe (strain 972 / ATCC 24843) GN=rpl1002 PE=3 SV=1 1.01012e-82	tr|D2DMN0|D2DMN0_MAIZE QM-like protein OS=Zea mays PE=2 SV=1 2.3e-54	GO:0000027, ribosomal large subunit assembly;GO:0002181, cytoplasmic translation;GO:0003735, structural constituent of ribosome;GO:0005829, cytosol;GO:0005840, ribosome;GO:0006412, translation;GO:0022625, cytosolic large ribosomal subunit;GO:0042254, ribosome biogenesis	-
TRINITY_DN92983_c0_g4	7.348859833330001	0.773072666667	3.2488445	0.000465875106065	0.032698452272	up	cd11299, O-FucT_plant, GDP-fucose protein O-fucosyltransferase, plant specific subfamily. Some members of this plant-specific family of O-fucosyltransferases have been annotated as auxin-independent growth promotors. The function of the protein seems unclear. O-fucosyltransferase-like proteins are GDP-fucose dependent enzymes with similarities to the family 1 glycosyltransferases (GT1). They are …	-	gi|1021029122|gb|KZM86907.1| hypothetical protein DCAR_024041 [Daucus carota subsp. sativus] 3.0e-64	gi|1000948980|ref|XM_015724577.1| PREDICTED: Ricinus communis uncharacterized protein At1g04910 (LOC8273453), mRNA 2.23627e-35	-	sp|Q8W486|Y1491_ARATH Uncharacterized protein At1g04910 OS=Arabidopsis thaliana GN=At1g04910 PE=2 SV=1 3.41795e-08	tr|M1BTB1|M1BTB1_SOLTU Uncharacterized protein OS=Solanum tuberosum GN=PGSC0003DMG400020335 PE=4 SV=1 5.2e-37	GO:0000139, Golgi membrane;GO:0005737, cytoplasm;GO:0005768, endosome;GO:0005794, Golgi apparatus;GO:0005802, trans-Golgi network;GO:0016021, integral component of membrane;GO:0016757, transferase activity, transferring glycosyl groups	-
TRINITY_DN74281_c1_g1	0.569112483333	19.8252550071	-5.122481787880001	0.000331844591124	0.0261367263308	down	-	-	-	-	-	-	-	-	-
TRINITY_DN83039_c0_g1	0.012768466666700002	8.27456083918	-9.3399536489	0.000284433974499	0.023708754988000003	down	pfam02365, NAM, No apical meristem (NAM) protein. This is a family of no apical meristem (NAM) proteins these are plant development proteins. Mutations in NAM result in the failure to develop a shoot apical meristem in petunia embryos. NAM is indicated as having a role in determining positions of meristems and primordial. One member of this family NAP (NAC-like, activated by AP3/PI) is encoded by…	-	gi|1021047945|gb|KZN05725.1| hypothetical protein DCAR_006562 [Daucus carota subsp. sativus] 4.1e-136	gi|1026013229|ref|XM_016709570.1| PREDICTED: Capsicum annuum NAC domain-containing protein 43-like (LOC107863580), mRNA 6.38291e-93	pfam02365, NAM, No apical meristem (NAM) protein. This is a family of no apical meristem (NAM) proteins these are plant development proteins. Mutations in NAM result in the failure to develop a shoot apical meristem in petunia embryos. NAM is indicated as having a role in determining positions of meristems and primordial. One member of this family NAP (NAC-like, activated by AP3/PI) is encoded by…	sp|Q84WP6|NAC43_ARATH NAC domain-containing protein 43 OS=Arabidopsis thaliana GN=NAC043 PE=2 SV=2 1.95868e-93	tr|A0A0U3SLK1|A0A0U3SLK1_BETPL NAC transcription factor OS=Betula platyphylla PE=2 SV=1 8.5e-102	GO:0003677, DNA binding;GO:0003700, DNA binding transcription factor activity;GO:0005634, nucleus;GO:0006351, transcription, DNA-templated;GO:0006355, regulation of transcription, DNA-templated;GO:0009834, plant-type secondary cell wall biogenesis;GO:0010047, fruit dehiscence;GO:0045893, positive regulation of transcription, DNA-templated	-
TRINITY_DN83309_c0_g1	67.8378354667	2.08303449908	5.02533149938	0.00011424324418100002	0.012473505811900001	up	cd05355, SDR_c1, classical (c) SDR, subgroup 1. These proteins are members of the classical SDR family, with a canonical active site tetrad and a typical Gly-rich NAD-binding motif. SDRs are a functionally diverse family of oxidoreductases that have a single domain with a structurally conserved Rossmann fold (alpha/beta folding pattern with a central beta-sheet), an NAD(P)(H)-binding region, and …	KOG0725, KOG0725, KOG0725, Reductases with broad range of substrate specificities [General function prediction only]. 6.86028e-40	gi|75285530|sp|Q5KTS5.1|GRDH_DAUCA RecName: Full=Glucose and ribitol dehydrogenase; AltName: Full=Carrot ABA-induced in somatic embryos 5 protein 2.8e-149	gi|57506547|dbj|AB105043.1| Daucus carota CAISE5 mRNA for glucose and ribitol dehydrogenase protein, complete cds 0.0	pfam00106, adh_short, short chain dehydrogenase. This family contains a wide variety of dehydrogenases. 2.10111e-27	sp|Q5KTS5|GRDH_DAUCA Glucose and ribitol dehydrogenase OS=Daucus carota GN=CAISE5 PE=2 SV=1 0.0	tr|M1CSE2|M1CSE2_SOLTU Uncharacterized protein OS=Solanum tuberosum GN=PGSC0003DMG400028608 PE=4 SV=1 1.7e-133	GO:0016491, oxidoreductase activity	-
TRINITY_DN94686_c1_g4	14.075772	0.763652	4.20415489559	0.000124511869004	0.0133099015919	up	-	-	-	-	-	-	-	-	-
TRINITY_DN95756_c1_g3	5.417871333330001	86.075695	-3.98980788746	0.000200035880268	0.018925298937299998	down	-	-	-	-	-	-	-	-	-
TRINITY_DN88080_c0_g1	0.789411866667	10.26369415	-3.700628068380001	6.75056824095e-05	0.00855793736056	down	PLN02814, PLN02814, beta-glucosidase. 3.25214e-48	KOG0626, KOG0626, KOG0626, Beta-glucosidase, lactase phlorizinhydrolase, and related proteins [Carbohydrate transport and metabolism]. 3.43426e-54	gi|1021044848|gb|KZN02629.1| hypothetical protein DCAR_011383 [Daucus carota subsp. sativus] 1.4e-86	gi|802573676|ref|XM_012213039.1| PREDICTED: Jatropha curcas beta-glucosidase 44-like (LOC105631046), mRNA 1.91228e-104	pfam00232, Glyco_hydro_1, Glycosyl hydrolase family 1. 1.01481e-34	sp|Q9LV33|BGL44_ARATH Beta-glucosidase 44 OS=Arabidopsis thaliana GN=BGLU44 PE=2 SV=1 2.16106e-82	tr|A0A0V0IDM7|A0A0V0IDM7_SOLCH Putative beta-glucosidase 44-like OS=Solanum chacoense PE=3 SV=1 5.4e-78	GO:0004553, hydrolase activity, hydrolyzing O-glycosyl compounds;GO:0004567, beta-mannosidase activity;GO:0005576, extracellular region;GO:0005618, cell wall;GO:0005975, carbohydrate metabolic process;GO:0008422, beta-glucosidase activity;GO:0009505, plant-type cell wall;GO:0022626, cytosolic ribosome;GO:0046872, metal ion binding;GO:0047668, amygdalin beta-glucosidase activity;GO:0080079, cellob…	K05350-ko00460 Cyanoamino acid metabolism;ko00500 Starch and sucrose metabolism;ko00940 Phenylpropanoid biosynthesis
TRINITY_DN83339_c2_g1	2.5795145	13.6944117427	-2.40841583363	0.000649719825584	0.040354800843699995	down	-	-	-	gi|594009948|gb|KJ513987.1| Daucus carota subsp. carota clone car279798 anonymous marker DC9853 genomic sequence 1.29522e-46	-	-	-	-	-
TRINITY_DN78103_c0_g2	30.73015	1.21013683333	4.6664127179	6.276813297e-05	0.00817080195311	up	PLN00113, PLN00113, leucine-rich repeat receptor-like protein kinase; Provisional. 1.17276e-22	KOG4194, KOG4194, KOG4194, Membrane glycoprotein LIG-1 [Signal transduction mechanisms]. 2.59371e-09	gi|1021036002|gb|KZM93785.1| hypothetical protein DCAR_017030 [Daucus carota subsp. sativus] 1.1e-143	gi|4455919|emb|AJ131340.1| Daucus carota afp gene 0.0	-	sp|A7PW81|PGIP_VITVI Polygalacturonase inhibitor OS=Vitis vinifera GN=pgip PE=1 SV=1 9.86797e-122	tr|K7U8T3|K7U8T3_DAUCA Antifreeze protein OS=Daucus carota GN=afp PE=2 SV=1 1.3e-139	GO:0005576, extracellular region;GO:0005618, cell wall;GO:0006952, defense response;GO:0016020, membrane	-
TRINITY_DN77486_c1_g1	10.9305363002	1.10537365	3.3057581556299995	0.000125980406739	0.013386874194	up	PLN02636, PLN02636, acyl-coenzyme A oxidase. 1.42425e-73	KOG0135, KOG0135, KOG0135, Pristanoyl-CoA/acyl-CoA oxidase [Lipid transport and metabolism, Secondary metabolites biosynthesis, transport and catabolism]. 6.50037e-13	gi|1021040620|gb|KZM98401.1| hypothetical protein DCAR_014237 [Daucus carota subsp. sativus] 4.2e-79	gi|593793191|ref|XM_007159573.1| Phaseolus vulgaris hypothetical protein (PHAVU_002G254200g) mRNA, complete cds 8.01566e-68	pfam01756, ACOX, Acyl-CoA oxidase. This is a family of Acyl-CoA oxidases EC:1.3.3.6. Acyl-coA oxidase converts acyl-CoA into trans-2- enoyl-CoA. 4.92647e-12	sp|O64894|ACOX2_CUCMA Acyl-coenzyme A oxidase, peroxisomal OS=Cucurbita maxima GN=Acx PE=1 SV=1 8.28029e-90	tr|Q9SDY4|Q9SDY4_PETCR Acyl-coenzyme A oxidase OS=Petroselinum crispum GN=ACO PE=3 SV=1 2.0e-73	GO:0003995, acyl-CoA dehydrogenase activity;GO:0003997, acyl-CoA oxidase activity;GO:0005777, peroxisome;GO:0006635, fatty acid beta-oxidation;GO:0009514, glyoxysome;GO:0050660, flavin adenine dinucleotide binding	-
TRINITY_DN97698_c3_g1	0.44299241666699996	10.532669711699999	-4.571445349519999	0.0004550487213419999	0.0322569384156	down	COG5064, SRP1, Karyopherin (importin) alpha [Intracellular trafficking and secretion]. 2.64955e-10	KOG0166, KOG0166, KOG0166, Karyopherin (importin) alpha [Intracellular trafficking, secretion, and vesicular transport]. 4.56169e-14	gi|1021054345|gb|KZN12123.1| hypothetical protein DCAR_004779 [Daucus carota subsp. sativus] 1.4e-11	-	-	sp|O80480|IMPA4_ARATH Importin subunit alpha-4 OS=Arabidopsis thaliana GN=IMPA4 PE=1 SV=1 3.78023e-15	-	GO:0005643, nuclear pore;GO:0005654, nucleoplasm;GO:0005829, cytosol;GO:0006607, NLS-bearing protein import into nucleus;GO:0008139, nuclear localization sequence binding;GO:0008565, protein transporter activity;GO:0030581, symbiont intracellular protein transport in host;GO:0043657, host cell;GO:0080034, host response to induction by symbiont of tumor, nodule or growth in host	-
TRINITY_DN96979_c1_g1	0.027683833333299997	5.29030105	-7.578162288150001	9.53144558479e-06	0.00205059895935	down	PTZ00169, PTZ00169, ADP/ATP transporter on adenylate translocase; Provisional. 2.24107e-40	KOG0749, KOG0749, KOG0749, Mitochondrial ADP/ATP carrier proteins [Energy production and conversion]. 1.37994e-37	gi|743864169|ref|XP_010943967.1| PREDICTED: ADP,ATP carrier protein 1, mitochondrial-like [Elaeis guineensis] 6.8e-38	gi|627846759|ref|XM_007691135.1| Bipolaris oryzae ATCC 44560 hypothetical protein partial mRNA 9.29134e-115	pfam00153, Mito_carr, Mitochondrial carrier protein. 5.69828e-09	sp|P02723|ADT_NEUCR ADP,ATP carrier protein OS=Neurospora crassa (strain ATCC 24698 / 74-OR23-1A / CBS 708.71 / DSM 1257 / FGSC 987) GN=aac PE=3 SV=1 8.37885e-55	tr|E6Y2P3|E6Y2P3_MARPO Putative mitochondrial ADP/ATP translocase OS=Marchantia polymorpha PE=2 SV=1 8.9e-38	GO:0003735, structural constituent of ribosome;GO:0005215, transporter activity;GO:0005743, mitochondrial inner membrane;GO:0006412, translation;GO:0016021, integral component of membrane;GO:0055085, transmembrane transport	-
TRINITY_DN98984_c5_g2	6.1250970666699995	0.38730881666699996	3.9831764589699996	0.000587897940788	0.0377304345584	up	-	-	-	-	-	-	-	-	-
TRINITY_DN93041_c1_g1	14.234760613399999	0.0001	17.1190587059	2.0286731223700002e-17	1.0750563343900001e-13	up	-	-	gi|734386883|gb|KHN25107.1| DEAD-box ATP-dependent RNA helicase 20 [Glycine soja] 3.3e-06	-	-	-	tr|A0A0B2QZM3|A0A0B2QZM3_GLYSO DEAD-box ATP-dependent RNA helicase 20 OS=Glycine soja GN=glysoja_027521 PE=3 SV=1 2.5e-06	GO:0003676, nucleic acid binding;GO:0004386, helicase activity;GO:0005524, ATP binding	-
TRINITY_DN93517_c4_g7	0.049335500000000004	7.6692005000000005	-7.280306246810001	7.1230027798600004e-06	0.00167510592359	down	PTZ00009, PTZ00009, heat shock 70 kDa protein; Provisional. 6.40133e-20	KOG0101, KOG0101, KOG0101, Molecular chaperones HSP70/HSC70, HSP70 superfamily [Posttranslational modification, protein turnover, chaperones]. 1.28547e-18	gi|388512705|gb|AFK44414.1| unknown [Lotus japonicus] 2.3e-27	gi|628058877|ref|XM_007697528.1| Cochliobolus sativus ND90Pr hypothetical protein mRNA 1.10608e-107	-	sp|P78983|HSP70_ALTAL Heat shock 70 kDa protein (Fragment) OS=Alternaria alternata GN=HSP70 PE=1 SV=2 2.08277e-44	tr|I3SVX2|I3SVX2_LOTJA Uncharacterized protein OS=Lotus japonicus PE=2 SV=1 1.8e-27	GO:0005524, ATP binding	-
TRINITY_DN73130_c0_g1	16.8865983333	2.64145483333	2.67647409199	0.000109331340313	0.012149827712900001	up	-	-	gi|1021048840|gb|KZN06620.1| hypothetical protein DCAR_007457 [Daucus carota subsp. sativus] 7.9e-37	gi|659117886|ref|XM_008460617.1| PREDICTED: Cucumis melo E3 ubiquitin-protein ligase RGLG2 (LOC103498122), transcript variant X4, mRNA 9.61616e-21	-	sp|Q9LY87|RGLG2_ARATH E3 ubiquitin-protein ligase RGLG2 OS=Arabidopsis thaliana GN=RGLG2 PE=1 SV=1 9.90881e-27	tr|A0A0D2PYG2|A0A0D2PYG2_GOSRA Uncharacterized protein OS=Gossypium raimondii GN=B456_008G202700 PE=4 SV=1 1.7e-28	GO:0004842, ubiquitin-protein transferase activity;GO:0005634, nucleus;GO:0005886, plasma membrane;GO:0008270, zinc ion binding;GO:0009690, cytokinin metabolic process;GO:0009850, auxin metabolic process;GO:0016874, ligase activity;GO:0080148, negative regulation of response to water deprivation	-
TRINITY_DN70509_c0_g1	17.300331	0.09990650000000001	7.43600538126	0.000644418449458	0.0401862935582	up	-	-	-	-	-	-	-	-	-
TRINITY_DN73590_c1_g6	6.3233753333300005	0.0669971666667	6.56045096035	9.013129515310001e-06	0.00196817455943	up	cd00204, ANK, ankyrin repeats; ankyrin repeats mediate protein-protein interactions in very diverse families of proteins. The number of ANK repeats in a protein can range from 2 to over 20 (ankyrins, for example). ANK repeats may occur in combinations with other types of domains. The structural repeat unit contains two antiparallel helices and a beta-hairpin, repeats are stacked in a superhelical…	KOG4412, KOG4412, KOG4412, 26S proteasome regulatory complex, subunit PSMD10 [Posttranslational modification, protein turnover, chaperones]. 3.75893e-10	gi|1021046486|gb|KZN04266.1| hypothetical protein DCAR_005092 [Daucus carota subsp. sativus] 1.3e-68	-	pfam12796, Ank_2, Ankyrin repeats (3 copies). 8.91114e-07	sp|Q04749|AVO2_YEAST Target of rapamycin complex 2 subunit AVO2 OS=Saccharomyces cerevisiae (strain ATCC 204508 / S288c) GN=AVO2 PE=1 SV=1 2.85262e-08	tr|A5B003|A5B003_VITVI Putative uncharacterized protein OS=Vitis vinifera GN=VITISV_032148 PE=4 SV=1 8.1e-18	GO:0001558, regulation of cell growth;GO:0005774, vacuolar membrane;GO:0005886, plasma membrane;GO:0016021, integral component of membrane;GO:0030950, establishment or maintenance of actin cytoskeleton polarity;GO:0031505, fungal-type cell wall organization;GO:0031929, TOR signaling;GO:0031932, TORC2 complex	-
TRINITY_DN81956_c4_g1	186.526388333	0.20831333333299998	9.806408847410001	9.48411366392e-06	0.0020454540153099997	up	-	-	-	-	-	-	-	-	-
TRINITY_DN81956_c4_g2	101.43532906700001	0.08360157104810001	10.2447425441	1.1611491844100001e-07	7.12523356176e-05	up	pfam02704, GASA, Gibberellin regulated protein. This is the GASA gibberellin regulated cysteine rich protein family. The expression of these proteins is up-regulated by the plant hormone gibberellin, most of these proteins have some role in plant development. There are 12 cysteine residues conserved within the alignment giving the potential for these proteins to posses 6 disulphide bonds. 1.41783…	-	gi|1021040876|gb|KZM98657.1| hypothetical protein DCAR_013981 [Daucus carota subsp. sativus] 2.6e-23	gi|985441486|ref|XM_006473594.2| PREDICTED: Citrus sinensis gibberellin-regulated protein 1 (LOC102628717), mRNA 3.99831e-13	pfam02704, GASA, Gibberellin regulated protein. This is the GASA gibberellin regulated cysteine rich protein family. The expression of these proteins is up-regulated by the plant hormone gibberellin, most of these proteins have some role in plant development. There are 12 cysteine residues conserved within the alignment giving the potential for these proteins to posses 6 disulphide bonds. 3.38731…	sp|F4IQJ4|GASAB_ARATH Gibberellin-regulated protein 11 OS=Arabidopsis thaliana GN=GASA11 PE=3 SV=1 1.30523e-20	tr|D7LBC0|D7LBC0_ARALL Predicted protein OS=Arabidopsis lyrata subsp. lyrata GN=ARALYDRAFT_674622 PE=4 SV=1 1.0e-22	GO:0005576, extracellular region;GO:0007586, digestion;GO:0008047, enzyme activator activity;GO:0009740, gibberellic acid mediated signaling pathway;GO:0016042, lipid catabolic process	-
TRINITY_DN87502_c0_g3	6.1041405	0.33429361539700003	4.1906004627	8.33293813081e-06	0.00187109806404	up	PLN02687, PLN02687, flavonoid 3'-monooxygenase. 1.35278e-48	KOG0156, KOG0156, KOG0156, Cytochrome P450 CYP2 subfamily [Secondary metabolites biosynthesis, transport and catabolism]. 1.48086e-49	gi|1024059475|gb|KZV55607.1| hypothetical protein F511_25498 [Dorcoceras hygrometricum] 2.4e-84	gi|1028988984|ref|XM_016893852.1| PREDICTED: Gossypium hirsutum isoflavone 3'-hydroxylase-like (LOC107958164), transcript variant X2, mRNA 1.04053e-17	pfam00067, p450, Cytochrome P450. Cytochrome P450s are haem-thiolate proteins involved in the oxidative degradation of various compounds. They are particularly well known for their role in the degradation of environmental toxins and mutagens. They can be divided into 4 classes, according to the method by which electrons from NAD(P)H are delivered to the catalytic site. Sequence conservation is re…	sp|Q9LHA1|C8D11_ARATH Cytochrome P450 81D11 OS=Arabidopsis thaliana GN=CYP81D11 PE=2 SV=1 1.30789e-81	tr|A0A068UAQ6|A0A068UAQ6_COFCA Uncharacterized protein OS=Coffea canephora GN=GSCOC_T00018745001 PE=3 SV=1 8.3e-82	GO:0002213, defense response to insect;GO:0004497, monooxygenase activity;GO:0005506, iron ion binding;GO:0016020, membrane;GO:0016021, integral component of membrane;GO:0016705, oxidoreductase activity, acting on paired donors, with incorporation or reduction of molecular oxygen;GO:0016709, oxidoreductase activity, acting on paired donors, with incorporation or reduction of molecular oxygen, NAD…	-
TRINITY_DN84719_c0_g2	527.309841667	40.694694500000004	3.6957383002999995	0.0006610899223630001	0.0408202275899	up	TIGR00861, Glycerol_uptake_facilitator_protein, MIP family channel proteins. 1.A.8 The Major Intrinsic Protein (MIP) FamilyThe MIP family is large and diverse, possessing over 100 members that all form transmembrane channels. These channel proteins function in water, smallcarbohydrate (e.g., glycerol), urea, NH3, CO2 and possibly ion transport by an energy independent mechanism. They are found ub…	-	gi|694383809|ref|XP_009367837.1| PREDICTED: probable aquaporin PIP1-2 [Pyrus x bretschneideri] 1.2e-10	gi|766543141|emb|LM654172.1| Coffea arabica mRNA for aquaporin (Ca-PIP12 gene) 6.08659e-27	pfam00230, MIP, Major intrinsic protein. MIP (Major Intrinsic Protein) family proteins exhibit essentially two distinct types of channel properties: (1) specific water transport by the aquaporins, and (2) small neutral solutes transport, such as glycerol by the glycerol facilitators. 1.23097e-06	sp|P61838|PIP11_VICFA Aquaporin PIP1.1 OS=Vicia faba GN=PIP1.1 PE=2 SV=1 1.71393e-13	tr|W5H0F9|W5H0F9_WHEAT Uncharacterized protein OS=Triticum aestivum PE=3 SV=1 5.3e-11	GO:0005215, transporter activity;GO:0005886, plasma membrane;GO:0016021, integral component of membrane	-
TRINITY_DN76796_c1_g1	0.612179566667	6.389993433330001	-3.38378765209	0.0007686845709580001	0.0447317063421	down	-	-	-	gi|32994282|dbj|AK109073.1| Oryza sativa Japonica Group cDNA clone:002-154-G05, full insert sequence 0.0	-	-	-	-	-
TRINITY_DN83747_c0_g1	0.414256383333	46.4577081667	-6.80925024691	6.92465006656e-05	0.00868277516299	down	pfam00854, PTR2, POT family. The POT (proton-dependent oligopeptide transport) family all appear to be proton dependent transporters. 3.74772e-19	KOG1237, KOG1237, KOG1237, H+/oligopeptide symporter [Amino acid transport and metabolism]. 1.36826e-50	gi|1021054044|gb|KZN11822.1| hypothetical protein DCAR_004478 [Daucus carota subsp. sativus] 7.3e-125	-	pfam00854, PTR2, POT family. The POT (proton-dependent oligopeptide transport) family all appear to be proton dependent transporters. 8.95361e-20	sp|Q9M817|PTR6_ARATH Protein NRT1/ PTR FAMILY 1.2 OS=Arabidopsis thaliana GN=NPF1.2 PE=1 SV=1 9.46302e-88	tr|A0A068V8G6|A0A068V8G6_COFCA Uncharacterized protein OS=Coffea canephora GN=GSCOC_T00017272001 PE=4 SV=1 2.0e-82	GO:0005215, transporter activity;GO:0005886, plasma membrane;GO:0016021, integral component of membrane;GO:0080054, low-affinity nitrate transmembrane transporter activity	-
TRINITY_DN91067_c1_g2	32.249801	10.1705286333	1.66489559023	2.81237345721e-05	0.00458306687252	up	cd00320, cpn10, Chaperonin 10 Kd subunit (cpn10 or GroES); Cpn10 cooperates with chaperonin 60 (cpn60 or GroEL), an ATPase, to assist the folding and assembly of proteins and is found in eubacterial cytosol, as well as in the matrix of mitochondria and chloroplasts. It forms heptameric rings with a dome-like structure, forming a lid to the large cavity of the tetradecameric cpn60 cylinder and the…	KOG1641, KOG1641, KOG1641, Mitochondrial chaperonin [Posttranslational modification, protein turnover, chaperones]. 9.02252e-16	gi|1021048687|gb|KZN06467.1| hypothetical protein DCAR_007304 [Daucus carota subsp. sativus] 1.3e-24	-	pfam00166, Cpn10, Chaperonin 10 Kd subunit. This family contains GroES and Gp31-like chaperonins. Gp31 is a functional co-chaperonin that is required for the folding and assembly of Gp23, a major capsid protein, during phage morphogenesis. 5.84815e-07	sp|P34893|CH10_ARATH 10 kDa chaperonin OS=Arabidopsis thaliana GN=CPN10 PE=3 SV=1 1.67844e-22	tr|M5XHL1|M5XHL1_PRUPE Uncharacterized protein OS=Prunus persica GN=PRUPE_ppa013898mg PE=3 SV=1 1.1e-20	GO:0005507, copper ion binding;GO:0005524, ATP binding;GO:0005737, cytoplasm;GO:0005739, mitochondrion;GO:0005759, mitochondrial matrix;GO:0006457, protein folding;GO:0006986, response to unfolded protein;GO:0009408, response to heat;GO:0051082, unfolded protein binding;GO:0051085, chaperone cofactor-dependent protein refolding;GO:0051087, chaperone binding	-
TRINITY_DN71113_c0_g2	0.016978999999999998	18.670528899999997	-10.102795589600001	6.11953099986e-06	0.0014725527563099999	down	-	-	-	-	-	-	-	-	-
TRINITY_DN94176_c0_g2	4.13570043333	12.787530466700002	-1.62853408333	0.000498415817761	0.0342526565177	down	cd03288, ABCC_SUR2, ATP-binding cassette domain 2 of the sulfonylurea receptor SUR. The SUR domain 2. The sulfonylurea receptor SUR is an ATP binding cassette (ABC) protein of the ABCC/MRP family. Unlike other ABC proteins, it has no intrinsic transport function, neither active nor passive, but associates with the potassium channel proteins Kir6.1 or Kir6.2 to form the ATP-sensitive potassium (K(…	KOG0054, KOG0054, KOG0054, Multidrug resistance-associated protein/mitoxantrone resistance protein, ABC superfamily [Secondary metabolites biosynthesis, transport and catabolism]. 1.18307e-19	gi|802700604|ref|XP_012083772.1| PREDICTED: putative ABC transporter C family member 15 [Jatropha curcas] 5.4e-24	-	-	sp|Q7FB56|AB15C_ARATH Putative ABC transporter C family member 15 OS=Arabidopsis thaliana GN=ABCC15 PE=5 SV=2 8.15445e-35	tr|A0A067KAS0|A0A067KAS0_JATCU Uncharacterized protein OS=Jatropha curcas GN=JCGZ_14690 PE=4 SV=1 4.1e-24	GO:0005524, ATP binding;GO:0008559, xenobiotic transmembrane transporting ATPase activity;GO:0016021, integral component of membrane;GO:0042626, ATPase activity, coupled to transmembrane movement of substances	-
TRINITY_DN78694_c3_g1	1.5122617667200002	106.55056348299999	-6.13868652632	0.00012765628489899998	0.0134829425841	down	-	KOG1485, KOG1485, KOG1485, Mitochondrial Fe2+ transporter MMT1 and related transporters (cation diffusion facilitator superfamily) [Inorganic ion transport and metabolism]. 3.52752e-60	gi|1021043121|gb|KZN00902.1| hypothetical protein DCAR_009656 [Daucus carota subsp. sativus] 3.1e-99	gi|955373378|ref|XM_003546775.3| PREDICTED: Glycine max metal tolerance protein 10 (LOC100803531), mRNA 1.93747e-64	-	sp|Q0WU02|MTP10_ARATH Metal tolerance protein 10 OS=Arabidopsis thaliana GN=MTP10 PE=2 SV=1 1.64448e-107	tr|A0A059BZJ7|A0A059BZJ7_EUCGR Uncharacterized protein OS=Eucalyptus grandis GN=EUGRSUZ_F04469 PE=4 SV=1 2.4e-91	GO:0005385, zinc ion transmembrane transporter activity;GO:0005774, vacuolar membrane;GO:0008324, cation transmembrane transporter activity;GO:0010043, response to zinc ion;GO:0016020, membrane;GO:0016021, integral component of membrane;GO:0061088, regulation of sequestering of zinc ion	-
TRINITY_DN87634_c2_g3	19.9822735167	1.78312575	3.4862403837800002	0.000788778669953	0.0455069025656	up	TIGR00815, Sulfate_transporter, high affinity sulphate transporter 1. The SulP family is a large and ubiquitous family with over 30 sequenced members derived from bacteria, fungi, plants and animals. Many organisms including Bacillus subtilis, Synechocystis sp, Saccharomyces cerevisiae, Arabidopsis thaliana and Caenorhabditis elegans possess multiple SulP family paralogues. Many of these proteins…	KOG0236, KOG0236, KOG0236, Sulfate/bicarbonate/oxalate exchanger SAT-1 and related transporters (SLC26 family) [Inorganic ion transport and metabolism]. 1.14525e-34	gi|1021028675|gb|KZM86460.1| hypothetical protein DCAR_023594 [Daucus carota subsp. sativus] 1.8e-77	-	pfam00916, Sulfate_transp, Sulfate permease family. This family of integral membrane proteins are known as the Sulfate Permease (SulP) family. SulP is a large family found in all domains of life. Although sulfate is a commonly transported ion there are many other activities in this family. See the TCDB description for a comprehensive summary. 5.04674e-17	sp|Q9SXS2|SUT33_ARATH Probable sulfate transporter 3.3 OS=Arabidopsis thaliana GN=SULTR3;3 PE=2 SV=2 3.29246e-101	tr|A0A061E9C7|A0A061E9C7_THECC Sulfate transporter 91 OS=Theobroma cacao GN=TCM_010882 PE=3 SV=1 1.4e-61	GO:0005887, integral component of plasma membrane;GO:0008271, secondary active sulfate transmembrane transporter activity;GO:0015116, sulfate transmembrane transporter activity;GO:0015293, symporter activity;GO:0016021, integral component of membrane	-
TRINITY_DN97099_c0_g1	14.377549499999999	2.14706705	2.74337865432	0.0006923958142289999	0.042028281574300004	up	-	-	gi|255546341|ref|XP_002514230.1| PREDICTED: NADP-dependent malic enzyme [Ricinus communis] 6.4e-09	-	-	sp|P34105|MAOX_POPTR NADP-dependent malic enzyme OS=Populus trichocarpa PE=2 SV=3 2.8878e-11	tr|B9RKI6|B9RKI6_RICCO Malic enzyme OS=Ricinus communis GN=RCOM_1049930 PE=3 SV=1 4.9e-09	GO:0004471, malate dehydrogenase (decarboxylating) (NAD+) activity;GO:0004473, malate dehydrogenase (decarboxylating) (NADP+) activity;GO:0005737, cytoplasm;GO:0006108, malate metabolic process;GO:0008948, oxaloacetate decarboxylase activity;GO:0046872, metal ion binding;GO:0051287, NAD binding	-
TRINITY_DN74378_c1_g1	252.4671176	6.765413583330001	5.22177355534	3.14312135592e-05	0.00495906568798	up	pfam00304, Gamma-thionin, Gamma-thionin family. 4.60548e-09	-	gi|1021028605|gb|KZM86390.1| hypothetical protein DCAR_023524 [Daucus carota subsp. sativus] 3.6e-15	-	pfam00304, Gamma-thionin, Gamma-thionin family. 1.10029e-09	sp|Q39182|DEF02_ARATH Defensin-like protein 2 OS=Arabidopsis thaliana GN=PDF2.2 PE=2 SV=1 6.42807e-13	tr|A0A103P428|A0A103P428_CYNCS Gamma Purothionin OS=Cynara cardunculus var. scolymus GN=Ccrd_026508 PE=3 SV=1 2.2e-12	GO:0005576, extracellular region;GO:0005618, cell wall;GO:0005886, plasma membrane;GO:0006952, defense response;GO:0009505, plant-type cell wall;GO:0031640, killing of cells of other organism;GO:0050832, defense response to fungus	-
TRINITY_DN86264_c1_g2	6.6776765	0.0001	16.0270585833	7.702976570929999e-17	2.99259892414e-13	up	-	-	-	-	-	-	-	-	-
TRINITY_DN88163_c1_g2	31.9527753333	0.9634533835629999	5.05158257126	8.91239184861e-05	0.010505677338700002	up	-	-	gi|1029016718|ref|XP_016672251.1| PREDICTED: transcription factor bHLH61-like [Gossypium hirsutum] 1.2e-20	gi|1029058654|ref|XM_016824295.1| PREDICTED: Gossypium hirsutum transcription factor bHLH61-like (LOC107898760), mRNA 1.74843e-26	-	sp|Q9LSL1|BH093_ARATH Transcription factor bHLH93 OS=Arabidopsis thaliana GN=BHLH93 PE=1 SV=1 8.47938e-25	tr|A0A0D2SIK7|A0A0D2SIK7_GOSRA Uncharacterized protein OS=Gossypium raimondii GN=B456_007G229900 PE=4 SV=1 2.6e-20	GO:0003677, DNA binding;GO:0003700, DNA binding transcription factor activity;GO:0005634, nucleus;GO:0006351, transcription, DNA-templated;GO:0007275, multicellular organism development	-
TRINITY_DN88163_c1_g3	76.815024	2.62546128762	4.87074568214	1.65924475914e-06	0.000532831073444	up	-	-	gi|1021043015|gb|KZN00796.1| hypothetical protein DCAR_009550 [Daucus carota subsp. sativus] 5.9e-27	-	-	sp|Q9LSL1|BH093_ARATH Transcription factor bHLH93 OS=Arabidopsis thaliana GN=BHLH93 PE=1 SV=1 2.67131e-25	tr|A0A061FF70|A0A061FF70_THECC Beta HLH protein 93 OS=Theobroma cacao GN=TCM_034574 PE=4 SV=1 4.2e-25	GO:0003677, DNA binding;GO:0003700, DNA binding transcription factor activity;GO:0005634, nucleus;GO:0006351, transcription, DNA-templated;GO:0007275, multicellular organism development	-
TRINITY_DN95799_c2_g1	7.9987961	1.84995547833	2.11229232533	0.00044563114524800003	0.0320366614353	up	PLN03185, PLN03185, phosphatidylinositol phosphate kinase; Provisional. 1.0344e-42	KOG0231, KOG0231, KOG0231, Junctional membrane complex protein Junctophilin and related MORN repeat proteins [General function prediction only]. 2.26986e-10	gi|1021040872|gb|KZM98653.1| hypothetical protein DCAR_013985 [Daucus carota subsp. sativus] 8.1e-66	-	-	sp|Q8RY89|PI5K8_ARATH Phosphatidylinositol 4-phosphate 5-kinase 8 OS=Arabidopsis thaliana GN=PIP5K8 PE=1 SV=1 3.125e-61	tr|K4B1Y9|K4B1Y9_SOLLC Uncharacterized protein OS=Solanum lycopersicum PE=4 SV=1 1.3e-63	GO:0005524, ATP binding;GO:0016308, 1-phosphatidylinositol-4-phosphate 5-kinase activity	-
TRINITY_DN90933_c1_g3	26.7617183333	0.457175833333	5.8712777986099995	1.6020829011899999e-06	0.00051637319251	up	-	-	gi|1021031869|gb|KZM89653.1| hypothetical protein DCAR_022984 [Daucus carota subsp. sativus] 8.4e-57	-	-	-	tr|B9RH65|B9RH65_RICCO AMP-activated protein kinase, gamma regulatory subunit, putative OS=Ricinus communis GN=RCOM_1447510 PE=4 SV=1 2.8e-28	GO:0016301, kinase activity	-
TRINITY_DN90933_c1_g1	46.239476000500005	0.703540962583	6.0383468140600005	1.45659280873e-06	0.000492208766498	up	-	-	gi|1021031869|gb|KZM89653.1| hypothetical protein DCAR_022984 [Daucus carota subsp. sativus] 2.5e-45	-	-	-	tr|A0A0B2QJY6|A0A0B2QJY6_GLYSO SNF1-related protein kinase regulatory subunit gamma-1 OS=Glycine soja GN=glysoja_014640 PE=4 SV=1 1.8e-27	GO:0016301, kinase activity	-
TRINITY_DN69211_c1_g1	0.0001	11.233765166700001	-16.7774820243	3.70629670057e-05	0.00557201201213	down	-	-	-	gi|1005752236|gb|CP014727.1| Saccharomyces cerevisiae strain BSPX042 chromosome XII sequence 3.42568e-93	-	sp|Q06235|YL162_YEAST Protein YLR162W OS=Saccharomyces cerevisiae (strain ATCC 204508 / S288c) GN=YLR162W PE=4 SV=1 2.83914e-17	-	GO:0016021, integral component of membrane	-
TRINITY_DN70735_c1_g1	1.1202656666700002	10.30162195	-3.2009586944599997	0.000276894433208	0.0233680174468	down	-	-	gi|922342272|ref|XP_013448061.1| hypothetical protein MTR_7g031847 [Medicago truncatula] 9.4e-18	gi|480326956|gb|JX507679.1| Pleosporales sp. 85 OA-2013 large subunit ribosomal RNA gene, partial sequence 0.0	-	-	tr|A0A0D2ZVC7|A0A0D2ZVC7_BRAOL Uncharacterized protein OS=Brassica oleracea var. oleracea PE=4 SV=1 2.5e-18	-	-
TRINITY_DN70745_c1_g1	0.41030716666699996	5.612977	-3.7739898891300006	0.00028155708801999997	0.023623364103799997	down	-	-	-	-	-	-	-	-	-
TRINITY_DN88571_c0_g1	31.2926083426	0.471854316667	6.0513366053799995	2.69045785119e-05	0.00441735755504	up	-	-	gi|1021053626|gb|KZN11404.1| hypothetical protein DCAR_004060 [Daucus carota subsp. sativus] 4.1e-35	-	-	-	tr|G7ISC0|G7ISC0_MEDTR Late embryogenesis abundant domain protein, putative OS=Medicago truncatula GN=MTR_2g014040 PE=4 SV=1 8.8e-06	-	-
TRINITY_DN96317_c3_g1	0.06690399999999999	5.974965666669999	-6.4806941448	0.000244461341135	0.0215034891885	down	-	-	-	-	-	-	-	-	-
TRINITY_DN86897_c0_g5	0.21946027585	228.848137885	-10.0262150141	1.3537646772700002e-06	0.00047110471420499996	down	-	-	gi|1021026208|gb|KZM83995.1| hypothetical protein DCAR_028583 [Daucus carota subsp. sativus] 5.5e-08	-	-	-	-	-	-
TRINITY_DN74109_c2_g2	1.63727001667	11.127783638299999	-2.7648021002700003	0.0007737193610489998	0.0448454313401	down	smart00340, HALZ, homeobox associated leucin zipper. 1.11174e-15	KOG0483, KOG0483, KOG0483, Transcription factor HEX, contains HOX and HALZ domains [Transcription]. 8.24879e-07	gi|1021035002|gb|KZM92786.1| hypothetical protein DCAR_019849 [Daucus carota subsp. sativus] 1.6e-53	gi|828326288|ref|XM_004508987.2| PREDICTED: Cicer arietinum homeobox-leucine zipper protein HAT22 (LOC101499622), mRNA 2.07813e-28	-	sp|A2Z1U1|HOX11_ORYSI Homeobox-leucine zipper protein HOX11 OS=Oryza sativa subsp. indica GN=HOX11 PE=2 SV=1 1.08509e-27	tr|M5VQI3|M5VQI3_PRUPE Uncharacterized protein OS=Prunus persica GN=PRUPE_ppa008075mg PE=4 SV=1 5.6e-27	GO:0003700, DNA binding transcription factor activity;GO:0005634, nucleus;GO:0006351, transcription, DNA-templated;GO:0043565, sequence-specific DNA binding	-
TRINITY_DN74872_c1_g1	9.419780102819999	106.758723783	-3.50251677251	0.000582304749416	0.0375432489359	down	pfam03055, RPE65, Retinal pigment epithelial membrane protein. This family represents a retinal pigment epithelial membrane receptor which is abundantly expressed in retinal pigment epithelium, and binds plasma retinal binding protein. The family also includes the sequence related neoxanthin cleavage enzyme in plants and lignostilbene-alpha,beta-dioxygenase in bacteria. 2.0221e-19	KOG1285, KOG1285, KOG1285, Beta, beta-carotene 15,15'-dioxygenase and related enzymes [Secondary metabolites biosynthesis, transport and catabolism]. 2.56437e-26	gi|1021054036|gb|KZN11814.1| carotenoid cleavage dioxygenase [Daucus carota subsp. sativus] 5.7e-182	-	pfam03055, RPE65, Retinal pigment epithelial membrane protein. This family represents a retinal pigment epithelial membrane receptor which is abundantly expressed in retinal pigment epithelium, and binds plasma retinal binding protein. The family also includes the sequence related neoxanthin cleavage enzyme in plants and lignostilbene-alpha,beta-dioxygenase in bacteria. 4.83096e-20	sp|Q8LIY8|CCD8B_ORYSJ Carotenoid cleavage dioxygenase 8 homolog B, chloroplastic OS=Oryza sativa subsp. japonica GN=CCD8B PE=1 SV=1 3.95065e-179	tr|A0A103XZQ1|A0A103XZQ1_CYNCS Carotenoid oxygenase OS=Cynara cardunculus var. scolymus GN=Ccrd_021895 PE=4 SV=1 2.3e-167	GO:0009507, chloroplast;GO:0010223, secondary shoot formation;GO:0016121, carotene catabolic process;GO:0016702, oxidoreductase activity, acting on single donors with incorporation of molecular oxygen, incorporation of two atoms of oxygen;GO:0046872, metal ion binding;GO:0102251, all-trans-beta-apo-10'-carotenal cleavage oxygenase activity;GO:1901601, strigolactone biosynthetic process	K17913-ko00906 Carotenoid biosynthesis
TRINITY_DN75915_c1_g1	207.274559167	0.027388666666700003	12.8856763962	7.14199342872e-06	0.00167510592359	up	pfam14547, Hydrophob_seed, Hydrophobic seed protein. This domain has a four-helix bundle structure. It contains four disulfide bonds, of which three function to keep the C- and N-terminal parts of the molecule in place. 3.60979e-14	-	gi|1021042790|gb|KZN00571.1| hypothetical protein DCAR_009325 [Daucus carota subsp. sativus] 8.4e-34	-	pfam14547, Hydrophob_seed, Hydrophobic seed protein. This domain has a four-helix bundle structure. It contains four disulfide bonds, of which three function to keep the C- and N-terminal parts of the molecule in place. 8.6241e-15	sp|Q9SU33|ERLL3_ARATH pEARLI1-like lipid transfer protein 3 OS=Arabidopsis thaliana GN=At4g12500 PE=2 SV=1 7.37893e-16	tr|A0A022QCA8|A0A022QCA8_ERYGU Uncharacterized protein (Fragment) OS=Erythranthe guttata GN=MIMGU_mgv1a020004mg PE=4 SV=1 2.1e-29	GO:0005576, extracellular region;GO:0005618, cell wall	-
TRINITY_DN88729_c1_g1	7.40730166667	0.0001	16.1766604725	0.00018603671729499997	0.017807969302	up	-	-	-	-	-	-	-	-	-
TRINITY_DN74976_c1_g1	13.261322	1.5635195	3.084355485	0.000499955815096	0.0342863920306	up	pfam16913, PUNUT, Purine nucleobase transmembrane transport. PUNUT is a family of largely plant and fungal purine transporters. Most members are 10-pass transmembrane proteins, and they belong to the drug/metabolite transporter (dmt) superfamily. The plant vascular system transports nucloebases and their derivatives such as cytokinins and caffeine by a common H+-coupled high-affinity purine trans…	-	gi|1021050412|gb|KZN08190.1| hypothetical protein DCAR_001255 [Daucus carota subsp. sativus] 9.9e-92	gi|970008711|ref|XM_015209740.1| PREDICTED: Solanum pennellii probable purine permease 4 (LOC107010456), mRNA 4.9953e-49	pfam16913, PUNUT, Purine nucleobase transmembrane transport. PUNUT is a family of largely plant and fungal purine transporters. Most members are 10-pass transmembrane proteins, and they belong to the drug/metabolite transporter (dmt) superfamily. The plant vascular system transports nucloebases and their derivatives such as cytokinins and caffeine by a common H+-coupled high-affinity purine trans…	sp|Q9SY29|PUP4_ARATH Probable purine permease 4 OS=Arabidopsis thaliana GN=PUP4 PE=2 SV=1 4.34347e-68	tr|B9GMZ7|B9GMZ7_POPTR Purine permease-related family protein OS=Populus trichocarpa GN=POPTR_0001s12370g PE=4 SV=2 3.5e-65	GO:0005215, transporter activity;GO:0005345, purine nucleobase transmembrane transporter activity;GO:0006863, purine nucleobase transport;GO:0016020, membrane;GO:0016021, integral component of membrane	-
TRINITY_DN96522_c1_g1	0.0830965	10.9782344833	-7.04564263145	4.64954909708e-05	0.0065822393028	down	-	-	-	-	-	-	-	-	-
TRINITY_DN79103_c0_g2	24.3300303545	3.8925117509800007	2.6439648204700004	8.2285498982e-05	0.00987279049393	up	cd05324, carb_red_PTCR-like_SDR_c, Porcine testicular carbonyl reductase (PTCR)-like, classical (c) SDRs. PTCR is a classical SDR which catalyzes the NADPH-dependent reduction of ketones on steroids and prostaglandins. Unlike most SDRs, PTCR functions as a monomer. This subgroup also includes human carbonyl reductase 1 (CBR1) and CBR3. CBR1 is an NADPH-dependent SDR with broad substrate specifici…	-	gi|1021035859|gb|KZM93642.1| hypothetical protein DCAR_016887 [Daucus carota subsp. sativus] 5.5e-58	gi|944547546|gb|KT003688.1| Daucus carota MITE Sto1, complete sequence 1.42866e-24	-	sp|A4UHT7|SALR_PAPBR Salutaridine reductase OS=Papaver bracteatum GN=SALR PE=1 SV=1 4.95591e-20	tr|F6HB25|F6HB25_VITVI Putative uncharacterized protein OS=Vitis vinifera GN=VIT_05s0094g00770 PE=3 SV=1 3.4e-44	GO:0009820, alkaloid metabolic process;GO:0047037, salutaridine reductase (NADPH) activity	K00079-ko00590 Arachidonic acid metabolism;ko00980 Metabolism of xenobiotics by cytochrome P450
TRINITY_DN83752_c1_g2	52.834505066700004	1.0043435833299998	5.71715562908	2.34492177174e-05	0.00396941631775	up	-	-	gi|1021034791|gb|KZM92575.1| hypothetical protein DCAR_020060 [Daucus carota subsp. sativus] 1.0e-08	-	-	-	-	-	-
TRINITY_DN96943_c1_g2	0.38776615	10.1281348833	-4.70703784409	2.54719863959e-05	0.0042379078013800005	down	cd00684, Terpene_cyclase_plant_C1, Plant Terpene Cyclases, Class 1. This CD includes a diverse group of monomeric plant terpene cyclases (Tspa-Tspf) that convert the acyclic isoprenoid diphosphates, geranyl diphosphate (GPP), farnesyl diphosphate (FPP), or geranylgeranyl diphosphate (GGPP) into cyclic monoterpenes, diterpenes, or sesquiterpenes, respectively; a few form acyclic species. Terpnoid …	-	gi|1021037189|gb|KZM94972.1| Terpene synthase like-13 [Daucus carota subsp. sativus] 1.1e-90	-	pfam03936, Terpene_synth_C, Terpene synthase family, metal binding domain. It has been suggested that this gene family be designated tps (for terpene synthase). It has been split into six subgroups on the basis of phylogeny, called tpsa-tpsf. tpsa includes vetispiridiene synthase, 5-epi- aristolochene synthase, and (+)-delta-cadinene synthase. tpsb includes (-)-limonene synthase. tpsc includes ka…	sp|Q8L5K3|RLC1_CITLI (R)-limonene synthase 1 OS=Citrus limon PE=2 SV=1 6.09725e-63	tr|A0A0D2NLB7|A0A0D2NLB7_GOSRA Uncharacterized protein OS=Gossypium raimondii GN=B456_006G035800 PE=3 SV=1 3.0e-43	GO:0000287, magnesium ion binding;GO:0008152, metabolic process;GO:0010333, terpene synthase activity;GO:0034002, (R)-limonene synthase activity	K12742-ko00900 Terpenoid backbone biosynthesis
TRINITY_DN98652_c7_g3	4.33462003333	52.11943529999999	-3.58784401329	0.000502592327685	0.034357676658	down	-	-	gi|1021047590|gb|KZN05370.1| hypothetical protein DCAR_006207 [Daucus carota subsp. sativus] 2.2e-30	-	-	-	tr|A0A0D2U2M5|A0A0D2U2M5_GOSRA Uncharacterized protein OS=Gossypium raimondii GN=B456_013G166900 PE=4 SV=1 4.4e-07	-	-
TRINITY_DN80481_c0_g10	0.019702833333299998	7.281586666669999	-8.529705930499999	9.368558986080001e-06	0.00203055960734	down	-	-	-	-	-	-	-	-	-
TRINITY_DN69463_c3_g1	0.9608154000000001	13.206848300799999	-3.78088313602	1.71308604424e-07	9.47073910652e-05	down	PLN03192, PLN03192, Voltage-dependent potassium channel; Provisional. 5.3483e-07	KOG0498, KOG0498, KOG0498, K+-channel ERG and related proteins, contain PAS/PAC sensor domain [Inorganic ion transport and metabolism, Signal transduction mechanisms]. 1.74298e-54	gi|1021046766|gb|KZN04546.1| hypothetical protein DCAR_005383 [Daucus carota subsp. sativus] 2.5e-66	-	-	sp|O65717|CNGC1_ARATH Cyclic nucleotide-gated ion channel 1 OS=Arabidopsis thaliana GN=CNGC1 PE=1 SV=1 1.52522e-74	tr|A0A0D2UZZ9|A0A0D2UZZ9_GOSRA Uncharacterized protein OS=Gossypium raimondii GN=B456_012G003500 PE=4 SV=1 1.4e-64	GO:0005216, ion channel activity;GO:0005886, plasma membrane;GO:0005887, integral component of plasma membrane;GO:0016021, integral component of membrane;GO:0030552, cAMP binding;GO:0030553, cGMP binding;GO:0042391, regulation of membrane potential	-
TRINITY_DN76263_c0_g4	0.350969333333	118.35750248299999	-8.39759046606	2.1280094218800002e-07	0.000112651659984	down	PLN00411, PLN00411, nodulin MtN21 family protein; Provisional. 7.6439e-38	-	gi|1021040760|gb|KZM98541.1| hypothetical protein DCAR_014097 [Daucus carota subsp. sativus] 2.9e-184	gi|802635467|ref|XM_012222823.1| PREDICTED: Jatropha curcas WAT1-related protein At1g21890-like (LOC105638919), mRNA 1.35049e-54	-	sp|Q9LPF1|WTR8_ARATH WAT1-related protein At1g44800 OS=Arabidopsis thaliana GN=At1g44800 PE=1 SV=1 2.70753e-145	tr|A0A103XTR6|A0A103XTR6_CYNCS Drug/metabolite transporter OS=Cynara cardunculus var. scolymus GN=Ccrd_001205 PE=4 SV=1 2.7e-126	GO:0005886, plasma membrane;GO:0006865, amino acid transport;GO:0015171, amino acid transmembrane transporter activity;GO:0016021, integral component of membrane;GO:0022857, transmembrane transporter activity;GO:0032973, amino acid export across plasma membrane;GO:0034639, L-amino acid efflux transmembrane transporter activity;GO:0043090, amino acid import;GO:0080144, amino acid homeostasis	-
TRINITY_DN96246_c1_g3	3.64416105	12.9312461417	-1.82720268552	0.000263339320341	0.022684319145800002	down	TIGR01755, NADPH_dehydrogenase_quinone, NAD(P)H:quinone oxidoreductase, type IV. This model represents a protein, WrbA, related to and slightly larger than flavodoxin. It was just shown, in E. coli and Archaeoglobus fulgidus (and previously for some eukaryotic homologs) to act as fourth type of NAD(P)H:quinone oxidoreductase. In E. coli, this protein was earlier reported to be produced during sta…	KOG3135, KOG3135, KOG3135, 1,4-benzoquinone reductase-like; Trp repressor binding protein-like/protoplast-secreted protein [General function prediction only]. 4.06509e-27	gi|1021032353|gb|KZM90137.1| hypothetical protein DCAR_022498 [Daucus carota subsp. sativus] 3.5e-35	gi|590607961|ref|XM_007021073.1| Theobroma cacao Quinone reductase family protein (TCM_031171) mRNA, complete cds 1.30165e-24	-	sp|Q6NQE2|FQRL1_ARATH Probable NAD(P)H dehydrogenase (quinone) FQR1-like 1 OS=Arabidopsis thaliana GN=At4g27270 PE=2 SV=1 1.67355e-37	tr|W9SHP8|W9SHP8_9ROSA Flavoprotein wrbA OS=Morus notabilis GN=L484_002936 PE=3 SV=1 5.5e-33	GO:0003955, NAD(P)H dehydrogenase (quinone) activity;GO:0005886, plasma membrane;GO:0009506, plasmodesma;GO:0010181, FMN binding;GO:0016491, oxidoreductase activity;GO:0045892, negative regulation of transcription, DNA-templated	K03809-ko00130 Ubiquinone and other terpenoid-quinone biosynthesis
TRINITY_DN88126_c0_g2	173.964634738	3.2754135585000004	5.730973165319999	0.000301245619356	0.024454369065000002	up	-	-	gi|1021047354|gb|KZN05134.1| hypothetical protein DCAR_005971 [Daucus carota subsp. sativus] 1.2e-12	-	-	sp|Q9ZV24|OP161_ARATH Outer envelope pore protein 16-1, chloroplastic OS=Arabidopsis thaliana GN=OEP161 PE=1 SV=1 3.79238e-06	tr|A0A103YMU1|A0A103YMU1_CYNCS Mitochondrial inner membrane translocase subunit Tim17/Tim22/Tim23/peroxisomal protein PMP24 OS=Cynara cardunculus var. scolymus GN=Ccrd_009626 PE=4 SV=1 2.3e-08	GO:0005744, mitochondrial inner membrane presequence translocase complex;GO:0005773, vacuole;GO:0009409, response to cold;GO:0009507, chloroplast;GO:0009527, plastid outer membrane;GO:0009536, plastid;GO:0009611, response to wounding;GO:0009707, chloroplast outer membrane;GO:0009744, response to sucrose;GO:0009749, response to glucose;GO:0009753, response to jasmonic acid;GO:0009941, chloroplast …	-
TRINITY_DN80416_c1_g2	0.0001	10.227089999999999	-16.6420361757	2.92719392359e-20	2.3243782513099995e-16	down	-	KOG2047, KOG2047, KOG2047, mRNA splicing factor [RNA processing and modification]. 1.23558e-08	gi|728841326|gb|KHG20769.1| Pre-mRNA-splicing factor SYF1 [Gossypium arboreum] 5.6e-08	gi|727583113|ref|XM_010466201.1| PREDICTED: Camelina sativa regulatory-associated protein of TOR 1 (LOC104745037), mRNA 8.65062e-18	-	sp|Q93YQ1|RTOR1_ARATH Regulatory-associated protein of TOR 1 OS=Arabidopsis thaliana GN=RAPTOR1 PE=1 SV=1 8.61024e-09	tr|W9QRC5|W9QRC5_9ROSA Pre-mRNA-splicing factor SYF1 OS=Morus notabilis GN=L484_006386 PE=4 SV=1 4.3e-08	GO:0006396, RNA processing;GO:0009793, embryo development ending in seed dormancy;GO:0016049, cell growth;GO:0031929, TOR signaling;GO:0031931, TORC1 complex;GO:0040008, regulation of growth;GO:0080008, Cul4-RING E3 ubiquitin ligase complex	K12867-ko03040 Spliceosome
TRINITY_DN88015_c0_g4	5.90462166667	0.0001	15.8495570027	6.11969100876e-06	0.0014725527563099999	up	-	-	-	-	-	-	-	-	-
TRINITY_DN78206_c2_g2	0.371063333333	23.896773683299998	-6.00900659407	0.000606680380972	0.038595565358199996	down	-	-	-	-	-	-	-	-	-
TRINITY_DN96831_c1_g2	0.817354445233	22.2191739079	-4.76469953134	5.36743058378e-05	0.00733691641942	down	pfam07058, MAP70, Microtubule-associated protein 70. This family represents a family of plant microtubule-associated proteins of size 70 kDa. The proteins contain four predicted coiled-coil domains, and truncation studies identify a central domain that targets the proteins to microtubules. It has no predicted trans-membrane domains, and the region between the coils from approximately residues 240…	-	gi|1021051803|gb|KZN09581.1| hypothetical protein DCAR_002237 [Daucus carota subsp. sativus] 1.7e-90	gi|1022945697|gb|KU318712.1| Allium cepa mitochondrion, complete genome 2.84129e-16	pfam07058, MAP70, Microtubule-associated protein 70. This family represents a family of plant microtubule-associated proteins of size 70 kDa. The proteins contain four predicted coiled-coil domains, and truncation studies identify a central domain that targets the proteins to microtubules. It has no predicted trans-membrane domains, and the region between the coils from approximately residues 240…	sp|Q6Z746|MP702_ORYSJ Microtubule-associated protein 70-2 OS=Oryza sativa subsp. japonica GN=MAP70.2 PE=2 SV=1 8.96929e-33	tr|B9IH23|B9IH23_POPTR Uncharacterized protein OS=Populus trichocarpa GN=POPTR_0016s00870g PE=4 SV=2 5.5e-41	GO:0005737, cytoplasm;GO:0005874, microtubule;GO:0007010, cytoskeleton organization	-
TRINITY_DN84439_c1_g3	1.94604021667	5.64485216667	-1.53639427366	0.00038536113440300004	0.029042397762400002	down	-	-	-	gi|169604631|ref|XM_001795685.1| Phaeosphaeria nodorum SN15 hypothetical protein partial mRNA 1.11824e-79	-	-	-	-	-
TRINITY_DN81622_c4_g1	0.0001	5.376837666669999	-15.7144702951	1.9178877386700003e-15	3.2069520834799997e-12	down	-	-	-	-	-	-	-	-	-
TRINITY_DN78303_c0_g1	14.2621304979	1.79546319993	2.98976152105	0.000462611739353	0.0325606346473	up	TIGR01614, unnamed_protein_product, pectinesterase inhibitor domain. This model describes a plant domain of about 200 amino acids, characterized by four conserved Cys residues, shown in a pectinesterase inhibitor from Kiwi to form two disulfide bonds: first to second and third to fourth. Roughly half the members of this family have the region described by this model followed immediately by a pect…	-	gi|1021050930|gb|KZN08708.1| hypothetical protein DCAR_001364 [Daucus carota subsp. sativus] 2.7e-75	-	pfam04043, PMEI, Plant invertase/pectin methylesterase inhibitor. This domain inhibits pectin methylesterases (PMEs) and invertases through formation of a non-covalent 1:1 complex. It has been implicated in the regulation of fruit development, carbohydrate metabolizm and cell wall extension. It may also be involved in inhibiting microbial pathogen PMEs. It has been observed that it is often expre…	sp|O49603|CVIF2_ARATH Cell wall / vacuolar inhibitor of fructosidase 2 OS=Arabidopsis thaliana GN=C/VIF2 PE=1 SV=1 2.68105e-51	tr|I3TAK1|I3TAK1_LOTJA Uncharacterized protein OS=Lotus japonicus PE=2 SV=1 4.5e-54	GO:0004857, enzyme inhibitor activity;GO:0005773, vacuole;GO:0043086, negative regulation of catalytic activity;GO:0080167, response to karrikin	-
TRINITY_DN90582_c2_g1	7.19869685	1.2148702666700002	2.56693350532	0.000264179935095	0.022711933849200002	up	-	-	gi|1021039058|gb|KZM96839.1| hypothetical protein DCAR_015799 [Daucus carota subsp. sativus] 4.2e-82	-	-	-	tr|A0A0J8BIR4|A0A0J8BIR4_BETVU Uncharacterized protein OS=Beta vulgaris subsp. vulgaris GN=BVRB_1g018220 PE=4 SV=1 5.7e-39	-	-
TRINITY_DN98668_c2_g3	0.38347683333300003	14.2789163333	-5.218603259130001	2.08211389378e-05	0.00365193578875	down	cd03009, TryX_like_TryX_NRX, Tryparedoxin (TryX)-like family, TryX and nucleoredoxin (NRX) subfamily; TryX and NRX are thioredoxin (TRX)-like protein disulfide oxidoreductases that alter the redox state of target proteins via the reversible oxidation of an active center CXXC motif. TryX is involved in the regulation of oxidative stress in parasitic trypanosomatids by reducing TryX peroxidase, whi…	-	gi|1021042081|gb|KZM99862.1| hypothetical protein DCAR_012776 [Daucus carota subsp. sativus] 1.2e-36	-	-	sp|Q0JIL1|NRX2_ORYSJ Probable nucleoredoxin 2 OS=Oryza sativa subsp. japonica GN=Os01g0794400 PE=2 SV=1 4.00008e-15	tr|B9HSZ3|B9HSZ3_POPTR Uncharacterized protein OS=Populus trichocarpa GN=POPTR_0010s06960g PE=4 SV=2 1.5e-18	GO:0005623, cell;GO:0045454, cell redox homeostasis;GO:0047134, protein-disulfide reductase activity	-
TRINITY_DN73269_c0_g1	0.13950485	42.8179496667	-8.261756624439998	1.91054689907e-07	0.000104300337496	down	-	-	gi|1021035860|gb|KZM93643.1| hypothetical protein DCAR_016888 [Daucus carota subsp. sativus] 3.9e-37	gi|848929600|ref|XM_012972725.1| PREDICTED: Erythranthe guttatus WAT1-related protein At5g07050-like (LOC105949417), mRNA 6.25774e-16	-	sp|Q9FL41|WTR38_ARATH WAT1-related protein At5g07050 OS=Arabidopsis thaliana GN=At5g07050 PE=2 SV=1 3.43454e-25	tr|A0A124SFJ5|A0A124SFJ5_CYNCS Drug/metabolite transporter (Fragment) OS=Cynara cardunculus var. scolymus GN=Ccrd_018264 PE=4 SV=1 3.4e-25	GO:0005886, plasma membrane;GO:0006810, transport;GO:0016021, integral component of membrane;GO:0022857, transmembrane transporter activity	-
TRINITY_DN69933_c3_g1	0.110379666667	8.125445333330001	-6.20190054635	2.68994867133e-07	0.000138211145056	down	-	-	-	gi|169625464|ref|XM_001806084.1| Phaeosphaeria nodorum SN15 hypothetical protein partial mRNA 1.06475e-45	-	-	-	-	-
TRINITY_DN92098_c0_g7	769.163028333	42.914145	4.1637642575	0.000225172117645	0.0203814600621	up	cd01958, HPS_like, HPS_like: Hydrophobic Protein from Soybean (HPS)-like subfamily; composed of proteins with similarity to HPS, a small hydrophobic protein with unknown function related to cereal-type alpha-amylase inhibitors and lipid transfer proteins. In addition to HPS, members of this subfamily include a hybrid proline-rich protein (HyPRP) from maize, a dark-inducible protein (LeDI-2) from …	-	gi|1021048203|gb|KZN05983.1| hypothetical protein DCAR_006820 [Daucus carota subsp. sativus] 4.0e-15	-	pfam14547, Hydrophob_seed, Hydrophobic seed protein. This domain has a four-helix bundle structure. It contains four disulfide bonds, of which three function to keep the C- and N-terminal parts of the molecule in place. 1.16781e-06	sp|Q39176|ERLI1_ARATH Lipid transfer protein EARLI 1 OS=Arabidopsis thaliana GN=EARLI1 PE=1 SV=1 5.3986e-09	tr|C3SAB4|C3SAB4_BRADI Proline-rich protein OS=Brachypodium distachyon GN=BRADI1G78250 PE=4 SV=1 1.6e-11	GO:0005576, extracellular region;GO:0005783, endoplasmic reticulum;GO:0009409, response to cold;GO:0009505, plant-type cell wall;GO:0009506, plasmodesma;GO:0009651, response to salt stress;GO:0009682, induced systemic resistance;GO:0009707, chloroplast outer membrane;GO:0009737, response to abscisic acid;GO:0050832, defense response to fungus	-
TRINITY_DN92098_c0_g6	243.464266667	11.19985	4.44215872755	0.00011239217021600002	0.0123641295867	up	-	-	-	-	-	-	-	-	-
TRINITY_DN82783_c0_g4	2.1702943	9.45302775	-2.12288579945	0.000416228298106	0.0306804161643	down	-	-	-	-	-	-	-	-	-
TRINITY_DN79672_c0_g1	0.468373383333	50.3697811667	-6.74875556008	0.00016958313307399999	0.0167487155669	down	pfam16913, PUNUT, Purine nucleobase transmembrane transport. PUNUT is a family of largely plant and fungal purine transporters. Most members are 10-pass transmembrane proteins, and they belong to the drug/metabolite transporter (dmt) superfamily. The plant vascular system transports nucloebases and their derivatives such as cytokinins and caffeine by a common H+-coupled high-affinity purine trans…	-	gi|1021034845|gb|KZM92629.1| hypothetical protein DCAR_020006 [Daucus carota subsp. sativus] 3.6e-52	gi|1026106331|ref|XM_016696693.1| PREDICTED: Capsicum annuum purine permease 1-like (LOC107851611), mRNA 6.58143e-15	pfam16913, PUNUT, Purine nucleobase transmembrane transport. PUNUT is a family of largely plant and fungal purine transporters. Most members are 10-pass transmembrane proteins, and they belong to the drug/metabolite transporter (dmt) superfamily. The plant vascular system transports nucloebases and their derivatives such as cytokinins and caffeine by a common H+-coupled high-affinity purine trans…	sp|Q9FZ96|PUP1_ARATH Purine permease 1 OS=Arabidopsis thaliana GN=PUP1 PE=1 SV=1 1.8117e-46	tr|B9H6Y5|B9H6Y5_POPTR PURINE PERMEASE 1 family protein OS=Populus trichocarpa GN=POPTR_0005s17520g PE=4 SV=2 4.6e-44	GO:0005215, transporter activity;GO:0005345, purine nucleobase transmembrane transporter activity;GO:0005887, integral component of plasma membrane;GO:0006863, purine nucleobase transport;GO:0010184, cytokinin transport;GO:0015211, purine nucleoside transmembrane transporter activity;GO:0016021, integral component of membrane	-
TRINITY_DN82339_c1_g2	0.2797543416	7.445302166669999	-4.73409797544	0.00018227191744599997	0.0175147471652	down	PLN03091, PLN03091, hypothetical protein; Provisional. 2.79196e-26	KOG0048, KOG0048, KOG0048, Transcription factor, Myb superfamily [Transcription]. 2.87714e-17	gi|1021026645|gb|KZM84432.1| hypothetical protein DCAR_028146 [Daucus carota subsp. sativus] 1.3e-38	gi|703096469|ref|XM_010097551.1| Morus notabilis Transcription factor partial mRNA 1.47531e-33	-	sp|Q50EX6|ODO1_PETHY Protein ODORANT1 OS=Petunia hybrida GN=ODO1 PE=2 SV=1 1.54478e-43	tr|A0A067JDN5|A0A067JDN5_JATCU MYB family protein OS=Jatropha curcas GN=JCGZ_21344 PE=4 SV=1 4.3e-21	GO:0003677, DNA binding;GO:0005634, nucleus;GO:0006351, transcription, DNA-templated;GO:0006355, regulation of transcription, DNA-templated	-
TRINITY_DN74763_c0_g3	16.15988015	0.029138816666700002	9.11525849257	5.19444159849e-06	0.0012989188931400001	up	PLN00028, PLN00028, nitrate transmembrane transporter; Provisional. 1.45657e-21	-	gi|1021033138|gb|KZM90922.1| hypothetical protein DCAR_021713 [Daucus carota subsp. sativus] 8.0e-33	-	-	sp|Q9LPV5|NRT25_ARATH High affinity nitrate transporter 2.5 OS=Arabidopsis thaliana GN=NRT2.5 PE=2 SV=1 7.50055e-22	tr|A0A118K5J3|A0A118K5J3_CYNCS Major facilitator superfamily OS=Cynara cardunculus var. scolymus GN=Ccrd_012444 PE=4 SV=1 4.7e-25	GO:0005215, transporter activity;GO:0005886, plasma membrane;GO:0016021, integral component of membrane;GO:0042128, nitrate assimilation;GO:0055085, transmembrane transport	-
TRINITY_DN74763_c0_g1	29.3211877333	0.134351016667	7.76979249605	1.33174780395e-07	7.80699163973e-05	up	PLN00028, PLN00028, nitrate transmembrane transporter; Provisional. 4.94566e-155	-	gi|1021033138|gb|KZM90922.1| hypothetical protein DCAR_021713 [Daucus carota subsp. sativus] 1.6e-170	gi|764581768|ref|XM_004298938.2| PREDICTED: Fragaria vesca subsp. vesca high affinity nitrate transporter 2.5-like (LOC101314372), mRNA 2.57624e-25	-	sp|Q9LPV5|NRT25_ARATH High affinity nitrate transporter 2.5 OS=Arabidopsis thaliana GN=NRT2.5 PE=2 SV=1 6.09335e-150	tr|F6HUX4|F6HUX4_VITVI Putative uncharacterized protein OS=Vitis vinifera GN=VIT_14s0066g00850 PE=4 SV=1 2.6e-141	GO:0005886, plasma membrane;GO:0009705, plant-type vacuole membrane;GO:0015112, nitrate transmembrane transporter activity;GO:0016021, integral component of membrane;GO:0042128, nitrate assimilation;GO:0055085, transmembrane transport	K02575-ko00910 Nitrogen metabolism
TRINITY_DN96161_c3_g3	2.5154457999999997	8.85599165	-1.81583975747	0.00025551710902800003	0.022207614848	down	-	-	-	-	-	-	-	-	-
TRINITY_DN94494_c1_g1	3.1945966	18.8649502834	-2.5620026276599996	0.000739016975797	0.04376148063080001	down	pfam03641, Lysine_decarbox, Possible lysine decarboxylase. The members of this family share a highly conserved motif PGGXGTXXE that is probably functionally important. This family includes proteins annotated as lysine decarboxylases, although the evidence for this is not clear. 8.92355e-35	-	gi|703141544|ref|XP_010107529.1| hypothetical protein L484_024382 [Morus notabilis] 3.9e-51	gi|848870856|ref|XM_012980562.1| PREDICTED: Erythranthe guttatus cytokinin riboside 5'-monophosphate phosphoribohydrolase LOG3-like (LOC105956683), mRNA 2.83776e-95	pfam03641, Lysine_decarbox, Possible lysine decarboxylase. The members of this family share a highly conserved motif PGGXGTXXE that is probably functionally important. This family includes proteins annotated as lysine decarboxylases, although the evidence for this is not clear. 2.13191e-35	sp|Q8L8B8|LOG3_ARATH Cytokinin riboside 5'-monophosphate phosphoribohydrolase LOG3 OS=Arabidopsis thaliana GN=LOG3 PE=1 SV=1 3.54119e-62	tr|W9RX65|W9RX65_9ROSA Cytokinin riboside 5'-monophosphate phosphoribohydrolase OS=Morus notabilis GN=L484_024382 PE=3 SV=1 3.0e-51	GO:0005634, nucleus;GO:0005737, cytoplasm;GO:0009691, cytokinin biosynthetic process;GO:0016799, hydrolase activity, hydrolyzing N-glycosyl compounds	-
TRINITY_DN81724_c0_g1	0.020958279273299997	11.5024922388	-9.10021049475	2.46591521571e-05	0.00415010204907	down	TIGR03389, laccase_11, laccase, plant. Members of this protein family include the copper-containing enzyme laccase (EC 1.10.3.2), often several from a single plant species, and additional, uncharacterized, closely related plant proteins termed laccase-like multicopper oxidases. This protein family shows considerable sequence similarity to the L-ascorbate oxidase (EC 1.10.3.3) family. Laccases are…	KOG1263, KOG1263, KOG1263, Multicopper oxidases [Secondary metabolites biosynthesis, transport and catabolism]. 1.70729e-103	gi|1021045249|gb|KZN03030.1| hypothetical protein DCAR_011786 [Daucus carota subsp. sativus] 3.0e-193	gi|764600500|ref|XM_004302595.2| PREDICTED: Fragaria vesca subsp. vesca laccase-4-like (LOC101311877), mRNA 2.05911e-42	pfam07731, Cu-oxidase_2, Multicopper oxidase. This entry contains many divergent copper oxidase-like domains that are not recognized by the pfam00394 model. 5.35212e-28	sp|Q0IQU1|LAC22_ORYSJ Laccase-22 OS=Oryza sativa subsp. japonica GN=LAC22 PE=2 SV=2 6.74859e-168	tr|A0A068V0M5|A0A068V0M5_COFCA Laccase OS=Coffea canephora GN=GSCOC_T00039249001 PE=3 SV=1 3.8e-164	GO:0005507, copper ion binding;GO:0009809, lignin biosynthetic process;GO:0016722, oxidoreductase activity, oxidizing metal ions;GO:0046274, lignin catabolic process;GO:0048046, apoplast;GO:0052716, hydroquinone:oxygen oxidoreductase activity	-
TRINITY_DN95543_c0_g1	0.7543495	100.71423616700001	-7.06081881248	9.089714814860001e-08	6.01484333283e-05	down	-	-	-	-	-	-	-	-	-
TRINITY_DN86197_c2_g3	7.657037883330001	0.25750166666700003	4.89413271988	0.00016646838896000002	0.0165421096365	up	PLN02222, PLN02222, phosphoinositide phospholipase C 2. 4.386e-87	KOG0169, KOG0169, KOG0169, Phosphoinositide-specific phospholipase C [Signal transduction mechanisms]. 6.93695e-38	gi|1021029102|gb|KZM86887.1| hypothetical protein DCAR_024021 [Daucus carota subsp. sativus] 1.4e-90	gi|955351574|ref|XM_003538420.3| PREDICTED: Glycine max phosphoinositide phospholipase C 6-like (LOC100799027), mRNA 2.84685e-49	pfam00388, PI-PLC-X, Phosphatidylinositol-specific phospholipase C, X domain. This associates with pfam00387 to form a single structural unit. 5.02624e-29	sp|Q39033|PLCD2_ARATH Phosphoinositide phospholipase C 2 OS=Arabidopsis thaliana GN=PLC2 PE=1 SV=1 9.81496e-87	tr|A0A068UDA9|A0A068UDA9_COFCA Phosphoinositide phospholipase C OS=Coffea canephora GN=GSCOC_T00023347001 PE=4 SV=1 8.3e-83	GO:0004435, phosphatidylinositol phospholipase C activity;GO:0004871, signal transducer activity;GO:0005622, intracellular;GO:0005886, plasma membrane;GO:0009553, embryo sac development;GO:0009556, microsporogenesis;GO:0010601, positive regulation of auxin biosynthetic process;GO:0016042, lipid catabolic process;GO:0035556, intracellular signal transduction;GO:0048437, floral organ development	K05857-ko04919 Thyroid hormone signaling pathway;ko00562 Inositol phosphate metabolism;ko04070 Phosphatidylinositol signaling system;ko04020 Calcium signaling pathway
TRINITY_DN86197_c2_g1	16.927528503599998	0.5910514833330001	4.839943737	0.0007332740829530001	0.0435117468232	up	PLN02222, PLN02222, phosphoinositide phospholipase C 2. 1.23003e-68	KOG0169, KOG0169, KOG0169, Phosphoinositide-specific phospholipase C [Signal transduction mechanisms]. 6.00194e-28	gi|1021025941|gb|KZM83728.1| hypothetical protein DCAR_028850 [Daucus carota subsp. sativus] 7.5e-46	gi|1009114535|ref|XM_016018256.1| PREDICTED: Ziziphus jujuba phosphoinositide phospholipase C 4-like (LOC107410786), mRNA 1.02697e-26	pfam00387, PI-PLC-Y, Phosphatidylinositol-specific phospholipase C, Y domain. This associates with pfam00388 to form a single structural unit. 3.48529e-20	sp|Q39033|PLCD2_ARATH Phosphoinositide phospholipase C 2 OS=Arabidopsis thaliana GN=PLC2 PE=1 SV=1 2.2175e-67	tr|F6HKS4|F6HKS4_VITVI Phosphoinositide phospholipase C OS=Vitis vinifera GN=VIT_08s0007g02280 PE=4 SV=1 3.5e-43	GO:0004435, phosphatidylinositol phospholipase C activity;GO:0004871, signal transducer activity;GO:0005622, intracellular;GO:0005886, plasma membrane;GO:0009553, embryo sac development;GO:0009556, microsporogenesis;GO:0010601, positive regulation of auxin biosynthetic process;GO:0016042, lipid catabolic process;GO:0035556, intracellular signal transduction;GO:0048437, floral organ development	K05857-ko04919 Thyroid hormone signaling pathway;ko00562 Inositol phosphate metabolism;ko04070 Phosphatidylinositol signaling system;ko04020 Calcium signaling pathway
