# Supplementary material for: De novo Transcriptome Sequencing Coupled With Co-expression Analysis Reveal the Transcriptional Regulation of Key Genes Involved in the Formation of Active Ingredients in Peucedanum praeruptorum Dunn Under Bolting Period
Source: Frontiers journal article supplement (doi:10.3389/fgene.2021.683037), 2021-06-14
Supplement: Data_Sheet_8.zip [file Data_Sheet_8.zip]

Gene id	MeanTPM (E)	MeanTPM (F)	log2FoldChange	pValue	qValue	result	CDD	KOG	NR	NT	PFAM	Swissprot	TrEMBL	GO	KEGG
TRINITY_DN98362_c5_g2	1.35172333333	10.7696022567	-2.99409316874	0.0014789933628499999	0.028012244626099997	down	pfam00083, Sugar_tr, Sugar (and other) transporter. 3.24779e-23	KOG0254, KOG0254, KOG0254, Predicted transporter (major facilitator superfamily) [General function prediction only]. 1.9844e-33	gi|1021040282|gb|KZM98063.1| hypothetical protein DCAR_014575 [Daucus carota subsp. sativus] 6.4e-86	gi|970019204|ref|XM_015215311.1| PREDICTED: Solanum pennellii D-xylose-proton symporter-like 2 (LOC107015133), mRNA 6.25001e-93	pfam00083, Sugar_tr, Sugar (and other) transporter. 6.60075e-24	sp|Q8L6Z8|XYLL1_ARATH D-xylose-proton symporter-like 1 OS=Arabidopsis thaliana GN=At3g03090 PE=2 SV=1 7.26206e-93	tr|M0ZIM5|M0ZIM5_SOLTU Uncharacterized protein OS=Solanum tuberosum GN=PGSC0003DMG401000567 PE=3 SV=1 2.4e-72	GO:0005351, carbohydrate:proton symporter activity;GO:0005353, fructose transmembrane transporter activity;GO:0005355, glucose transmembrane transporter activity;GO:0005774, vacuolar membrane;GO:0005887, integral component of plasma membrane;GO:0009624, response to nematode;GO:0009705, plant-type vacuole membrane;GO:0009845, seed germination;GO:0009911, positive regulation of flower development;G…	-
TRINITY_DN70799_c2_g3	506.20833333300004	1.2336433333299999	8.68066209964	6.48502419875e-05	0.004208268899880001	up	-	-	-	-	-	-	-	-	-
TRINITY_DN89577_c0_g2	41.6794466667	5.35951037754	2.9591630114	0.000347942766865	0.011836745491	up	-	-	gi|1021027498|gb|KZM85285.1| hypothetical protein DCAR_027293 [Daucus carota subsp. sativus] 1.8e-28	-	-	-	tr|A0A022QZD9|A0A022QZD9_ERYGU Uncharacterized protein (Fragment) OS=Erythranthe guttata GN=MIMGU_mgv1a022337mg PE=4 SV=1 1.1e-09	-	-
TRINITY_DN70831_c1_g3	0.2431045	5.4120156666699994	-4.47651751181	0.00197642878979	0.033139619230299996	down	cd13132, MATE_eukaryotic, Eukaryotic members of the multidrug and toxic compound extrusion (MATE) family. The integral membrane proteins from the MATE family are involved in exporting metabolites across the cell membrane and are responsible for multidrug resistance (MDR) in many bacteria and animals. MATE has also been identified as a large multigene family in plants, where the proteins are linke…	KOG1347, KOG1347, KOG1347, Uncharacterized membrane protein, predicted efflux pump [General function prediction only]. 1.73241e-16	gi|1021034215|gb|KZM91999.1| hypothetical protein DCAR_020636 [Daucus carota subsp. sativus] 5.6e-46	-	-	sp|Q8W488|DTX21_ARATH Protein DETOXIFICATION 21 OS=Arabidopsis thaliana GN=DTX21 PE=1 SV=1 8.64319e-37	tr|A0A118JZZ0|A0A118JZZ0_CYNCS Protein DETOXIFICATION OS=Cynara cardunculus var. scolymus GN=Ccrd_021178 PE=3 SV=1 4.7e-37	GO:0006855, drug transmembrane transport;GO:0015238, drug transmembrane transporter activity;GO:0015297, antiporter activity;GO:0016021, integral component of membrane	-
TRINITY_DN71103_c0_g2	51.909357666700004	8.329206440730001	2.63974368024	0.0022389685361	0.0356749353453	up	-	-	gi|1021044171|gb|KZN01952.1| hypothetical protein DCAR_010706 [Daucus carota subsp. sativus] 2.0e-52	-	-	-	tr|A0A022RVR0|A0A022RVR0_ERYGU Uncharacterized protein OS=Erythranthe guttata GN=MIMGU_mgv11b021844mg PE=4 SV=1 2.4e-21	-	-
TRINITY_DN78392_c0_g1	9.01096333333	0.861823	3.3862178420399998	0.0038115192998	0.0485841560355	up	-	-	-	-	-	-	-	-	-
TRINITY_DN95175_c2_g2	3.110159	35.6955085	-3.5206823120699995	0.00186775354788	0.032144600948299996	down	-	-	gi|590695683|ref|XP_007044959.1| Uncharacterized protein TCM_010707 [Theobroma cacao] 1.9e-55	gi|764645155|ref|XM_011459136.1| PREDICTED: Fragaria vesca subsp. vesca uncharacterized LOC101291014 (LOC101291014), mRNA 2.6992e-63	-	sp|Q8LDL0|HHL1_ARATH Protein HHL1, chloroplastic OS=Arabidopsis thaliana GN=HHL1 PE=1 SV=1 9.967e-71	tr|A0A061E755|A0A061E755_THECC Uncharacterized protein OS=Theobroma cacao GN=TCM_010707 PE=4 SV=1 1.4e-55	GO:0004222, metalloendopeptidase activity;GO:0006518, peptide metabolic process;GO:0009507, chloroplast;GO:0009534, chloroplast thylakoid;GO:0009535, chloroplast thylakoid membrane;GO:0009941, chloroplast envelope;GO:0016021, integral component of membrane	-
TRINITY_DN80840_c2_g1	210.554475767	7.195311666669999	4.870992554040001	3.7093478488999995e-08	1.85344698632e-05	up	pfam04800, ETC_C1_NDUFA4, ETC complex I subunit conserved region. Family of pankaryotic NADH-ubiquinone oxidoreductase subunits (EC:1.6.5.3) (EC:1.6.99.3) from complex I of the electron transport chain initially identified in Neurospora crassa as a 21 kDa protein. 4.38365e-08	KOG3389, KOG3389, KOG3389, NADH:ubiquinone oxidoreductase, NDUFS4/18 kDa subunit [Energy production and conversion]. 2.55741e-10	gi|1021042039|gb|KZM99820.1| hypothetical protein DCAR_012818 [Daucus carota subsp. sativus] 1.3e-15	gi|147858130|emb|AM482581.2| Vitis vinifera contig VV79X001945.2, whole genome shotgun sequence 4.53287e-29	pfam04800, ETC_C1_NDUFA4, ETC complex I subunit conserved region. Family of pankaryotic NADH-ubiquinone oxidoreductase subunits (EC:1.6.5.3) (EC:1.6.99.3) from complex I of the electron transport chain initially identified in Neurospora crassa as a 21 kDa protein. 1.04729e-08	sp|Q9FJW4|NDUS4_ARATH NADH dehydrogenase [ubiquinone] iron-sulfur protein 4, mitochondrial OS=Arabidopsis thaliana GN=FRO1 PE=2 SV=1 1.73211e-14	tr|A0A0A0KGI3|A0A0A0KGI3_CUCSA Uncharacterized protein OS=Cucumis sativus GN=Csa_6G495720 PE=4 SV=1 5.6e-14	GO:0005739, mitochondrion;GO:0005747, mitochondrial respiratory chain complex I;GO:0006970, response to osmotic stress;GO:0008137, NADH dehydrogenase (ubiquinone) activity;GO:0009631, cold acclimation;GO:0016651, oxidoreductase activity, acting on NAD(P)H;GO:0022900, electron transport chain;GO:0050897, cobalt ion binding	-
TRINITY_DN87607_c2_g1	66.91581550000001	10.4459341	2.6794057236400004	0.0008734412525720001	0.0205444840425	up	-	KOG1410, KOG1410, KOG1410, Nuclear transport receptor RanBP16 (importin beta superfamily) [Nuclear structure, Intracellular trafficking, secretion, and vesicular transport]. 1.42535e-12	gi|1021041335|gb|KZM99116.1| hypothetical protein DCAR_013522 [Daucus carota subsp. sativus] 7.5e-37	-	-	sp|Q9UIA9|XPO7_HUMAN Exportin-7 OS=Homo sapiens GN=XPO7 PE=1 SV=3 4.60743e-09	tr|B9GLS9|B9GLS9_POPTR Ran-binding family protein OS=Populus trichocarpa GN=POPTR_0001s07340g PE=4 SV=1 1.2e-29	GO:0005049, nuclear export signal receptor activity;GO:0005634, nucleus;GO:0005643, nuclear pore;GO:0005737, cytoplasm;GO:0006611, protein export from nucleus;GO:0008536, Ran GTPase binding;GO:0051028, mRNA transport	-
TRINITY_DN96210_c1_g1	49.25696	6.37865200018	2.9490041148	9.33217827349e-05	0.00533939977171	up	pfam00782, DSPc, Dual specificity phosphatase, catalytic domain. Ser/Thr and Tyr protein phosphatases. The enzyme's tertiary fold is highly similar to that of tyrosine-specific phosphatases, except for a "recognition" region. 6.33574e-10	KOG1716, KOG1716, KOG1716, Dual specificity phosphatase [Defense mechanisms]. 7.52208e-11	gi|1021040268|gb|KZM98049.1| hypothetical protein DCAR_014589 [Daucus carota subsp. sativus] 2.7e-75	gi|747060348|ref|XM_011078300.1| PREDICTED: Sesamum indicum phosphoglucan phosphatase LSF2, chloroplastic (LOC105160808), transcript variant X3, mRNA 1.24573e-68	pfam00782, DSPc, Dual specificity phosphatase, catalytic domain. Ser/Thr and Tyr protein phosphatases. The enzyme's tertiary fold is highly similar to that of tyrosine-specific phosphatases, except for a "recognition" region. 1.51366e-10	sp|Q9SRK5|LSF2_ARATH Phosphoglucan phosphatase LSF2, chloroplastic OS=Arabidopsis thaliana GN=LSF2 PE=1 SV=1 9.65864e-75	tr|B9S4C7|B9S4C7_RICCO Dual specificity protein phosphatase, putative OS=Ricinus communis GN=RCOM_0689450 PE=4 SV=1 9.1e-63	GO:0005983, starch catabolic process;GO:0008138, protein tyrosine/serine/threonine phosphatase activity;GO:0009507, chloroplast;GO:0019203, carbohydrate phosphatase activity;GO:0046838, phosphorylated carbohydrate dephosphorylation;GO:0050308, sugar-phosphatase activity;GO:2001070, starch binding	-
TRINITY_DN75580_c0_g1	0.667156351207	5.27388923333	-2.98277046236	0.000634105362535	0.016929611344999998	down	PLN02763, PLN02763, hydrolase, hydrolyzing O-glycosyl compounds. 1.26371e-167	KOG1065, KOG1065, KOG1065, Maltase glucoamylase and related hydrolases, glycosyl hydrolase family 31 [Carbohydrate transport and metabolism]. 2.9795e-44	gi|1021054085|gb|KZN11863.1| hypothetical protein DCAR_004519 [Daucus carota subsp. sativus] 3.8e-173	gi|731382078|ref|XM_010667180.1| PREDICTED: Vitis vinifera neutral alpha-glucosidase C-like (LOC100254505), transcript variant X2, mRNA 0.0	pfam01055, Glyco_hydro_31, Glycosyl hydrolases family 31. Glycosyl hydrolases are key enzymes of carbohydrate metabolizm. Family 31 comprises of enzymes that are, or similar to, alpha- galactosidases. 1.76753e-47	sp|Q9F234|AGL2_BACTQ Alpha-glucosidase 2 OS=Bacillus thermoamyloliquefaciens PE=3 SV=1 2.71416e-58	tr|K4CMS0|K4CMS0_SOLLC Uncharacterized protein OS=Solanum lycopersicum PE=3 SV=1 9.1e-151	GO:0004553, hydrolase activity, hydrolyzing O-glycosyl compounds;GO:0004558, alpha-1,4-glucosidase activity;GO:0005975, carbohydrate metabolic process;GO:0009507, chloroplast;GO:0030246, carbohydrate binding;GO:0032450, maltose alpha-glucosidase activity	-
TRINITY_DN76985_c0_g2	11.971160000000001	1.392786	3.10351744394	0.00058421879457	0.0161416844912	up	-	-	-	-	-	-	-	-	-
TRINITY_DN97050_c1_g1	0.7483139645319999	16.1127363843	-4.42841401582	0.0010347366705	0.022569976462500002	down	cd02947, TRX_family, TRX family; composed of two groups: Group I, which includes proteins that exclusively encode a TRX domain; and Group II, which are composed of fusion proteins of TRX and additional domains. Group I TRX is a small ancient protein that alter the redox state of target proteins via the reversible oxidation of an active site dithiol, present in a CXXC motif, partially exposed at t…	KOG0907, KOG0907, KOG0907, Thioredoxin [Posttranslational modification, protein turnover, chaperones]. 1.28398e-11	gi|1021043136|gb|KZN00917.1| hypothetical protein DCAR_009671 [Daucus carota subsp. sativus] 8.6e-33	gi|731400047|ref|XM_002282421.2| PREDICTED: Vitis vinifera thioredoxin-like 1-1, chloroplastic (LOC100260578), mRNA 1.86377e-40	-	sp|O64654|TRL11_ARATH Thioredoxin-like 1-1, chloroplastic OS=Arabidopsis thaliana GN=At1g08570 PE=2 SV=1 1.63516e-31	tr|A0A059A0P5|A0A059A0P5_EUCGR Uncharacterized protein OS=Eucalyptus grandis GN=EUGRSUZ_K01474 PE=4 SV=1 9.8e-29	GO:0000103, sulfate assimilation;GO:0005623, cell;GO:0006457, protein folding;GO:0006662, glycerol ether metabolic process;GO:0009507, chloroplast;GO:0009570, chloroplast stroma;GO:0015035, protein disulfide oxidoreductase activity;GO:0016671, oxidoreductase activity, acting on a sulfur group of donors, disulfide as acceptor;GO:0031969, chloroplast membrane;GO:0034599, cellular response to oxidat…	-
TRINITY_DN78038_c0_g1	27.40973	2.121915	3.6912493461199998	0.00107325469733	0.023121564426500003	up	-	-	-	-	-	sp|Q9LN68|GATL1_ARATH Probable galacturonosyltransferase-like 1 OS=Arabidopsis thaliana GN=GATL1 PE=2 SV=1 1.49904e-11	-	GO:0005783, endoplasmic reticulum;GO:0005789, endoplasmic reticulum membrane;GO:0005794, Golgi apparatus;GO:0010051, xylem and phloem pattern formation;GO:0010417, glucuronoxylan biosynthetic process;GO:0016021, integral component of membrane;GO:0016757, transferase activity, transferring glycosyl groups;GO:0032504, multicellular organism reproduction;GO:0045489, pectin biosynthetic process;GO:00…	-
TRINITY_DN96554_c0_g4	1.06637276667	30.709720500000003	-4.847911634730001	1.51896260271e-05	0.0015939782517600002	down	-	-	-	-	-	-	-	-	-
TRINITY_DN86178_c2_g3	46.4625766667	8.72063666667	2.4135637929900002	0.00352576748164	0.046615770060099995	up	-	-	-	-	-	-	-	-	-
TRINITY_DN73439_c2_g1	1.52338	9.492108466669999	-2.63945272612	0.0028241423081300002	0.0409116440475	down	-	-	gi|1021023545|gb|KZM81333.1| hypothetical protein DCAR_028946 [Daucus carota subsp. sativus] 2.0e-57	gi|595807998|ref|XM_007202641.1| Prunus persica hypothetical protein (PRUPE_ppa012724mg) mRNA, complete cds 2.81012e-51	-	sp|Q9SJU5|BBX18_ARATH B-box zinc finger protein 18 OS=Arabidopsis thaliana GN=BBX18 PE=1 SV=2 1.86785e-43	tr|A0A118K2C5|A0A118K2C5_CYNCS Zinc finger, B-box OS=Cynara cardunculus var. scolymus GN=Ccrd_017541 PE=4 SV=1 6.3e-48	GO:0000989, transcription factor activity, transcription factor binding;GO:0003700, DNA binding transcription factor activity;GO:0005622, intracellular;GO:0005634, nucleus;GO:0006351, transcription, DNA-templated;GO:0006355, regulation of transcription, DNA-templated;GO:0008270, zinc ion binding;GO:0010100, negative regulation of photomorphogenesis;GO:0070370, cellular heat acclimation;GO:0071483…	-
TRINITY_DN88611_c1_g1	0.167448933333	13.952520338900001	-6.380660753250001	7.02583102616e-05	0.00443084374725	down	PTZ00089, PTZ00089, transketolase; Provisional. 1.25542e-160	KOG0523, KOG0523, KOG0523, Transketolase [Carbohydrate transport and metabolism]. 9.7188e-63	gi|1021047807|gb|KZN05587.1| hypothetical protein DCAR_006424 [Daucus carota subsp. sativus] 5.9e-197	gi|1025154003|ref|XM_016612599.1| PREDICTED: Nicotiana tabacum transketolase, chloroplastic-like (LOC107790645), transcript variant X2, mRNA 0.0	pfam00456, Transketolase_N, Transketolase, thiamine diphosphate binding domain. This family includes transketolase enzymes EC:2.2.1.1. and also partially matches to 2-oxoisovalerate dehydrogenase beta subunit EC:1.2.4.4. Both these enzymes utilize thiamine pyrophosphate as a cofactor, suggesting there may be common aspects in their mechanism of catalysis. 7.24784e-91	sp|Q7SIC9|TKTC_MAIZE Transketolase, chloroplastic OS=Zea mays PE=1 SV=1 0.0	tr|B9T0B2|B9T0B2_RICCO Transketolase, putative OS=Ricinus communis GN=RCOM_0262670 PE=4 SV=1 1.4e-161	GO:0004802, transketolase activity;GO:0008152, metabolic process;GO:0009535, chloroplast thylakoid membrane;GO:0019253, reductive pentose-phosphate cycle;GO:0046872, metal ion binding;GO:0047896, formaldehyde transketolase activity	K00615-ko01200 Carbon metabolism;ko01051 Biosynthesis of ansamycins;ko00710 Carbon fixation in photosynthetic organisms;ko00030 Pentose phosphate pathway;ko01230 Biosynthesis of amino acids
TRINITY_DN74245_c3_g3	10.93861	0.0001	16.739069896900002	9.470052484699999e-05	0.0053912900898199995	up	-	-	-	-	-	-	-	-	-
TRINITY_DN78930_c0_g2	141.972666667	19.079966666700003	2.89548264511	3.09730600946e-05	0.00261968367782	up	-	-	-	-	-	-	-	-	-
TRINITY_DN73384_c0_g2	37.7141666667	2.50450333333	3.9125101116	6.07725455706e-05	0.00401179089698	up	-	-	-	-	-	-	-	-	-
TRINITY_DN76972_c2_g4	42.7421803333	2.163482	4.30423348078	0.00043042556897400004	0.013383989317299998	up	-	-	-	-	-	-	-	-	-
TRINITY_DN95875_c1_g7	9.446133333330001	0.048215	7.61409804113	0.0004461731695380001	0.013742091310399999	up	-	-	-	-	-	-	-	-	-
TRINITY_DN89232_c0_g3	290.138025	29.6464773333	3.29080678958	6.64904133143e-06	0.000870234144042	up	PLN00156, PLN00156, histone H2AX; Provisional. 9.11805e-11	KOG1756, KOG1756, KOG1756, Histone 2A [Chromatin structure and dynamics]. 7.05301e-10	gi|1021043478|gb|KZN01259.1| hypothetical protein DCAR_010013 [Daucus carota subsp. sativus] 1.2e-09	-	pfam16211, Histone_H2A_C, C-terminus of histone H2A. 1.09537e-07	sp|O65759|H2AX_CICAR Histone H2AX OS=Cicer arietinum GN=HIS2A PE=2 SV=1 1.63277e-10	tr|A0A068U5X3|A0A068U5X3_COFCA Histone H2A OS=Coffea canephora GN=GSCOC_T00015983001 PE=3 SV=1 7.8e-09	GO:0000786, nucleosome;GO:0003677, DNA binding;GO:0005634, nucleus	-
TRINITY_DN93280_c3_g1	0.35181	5.04743243333	-3.84268129698	0.00276331035024	0.04030908385819999	down	TIGR03389, laccase_11, laccase, plant. Members of this protein family include the copper-containing enzyme laccase (EC 1.10.3.2), often several from a single plant species, and additional, uncharacterized, closely related plant proteins termed laccase-like multicopper oxidases. This protein family shows considerable sequence similarity to the L-ascorbate oxidase (EC 1.10.3.3) family. Laccases are…	KOG1263, KOG1263, KOG1263, Multicopper oxidases [Secondary metabolites biosynthesis, transport and catabolism]. 4.89381e-57	gi|1021038299|gb|KZM96082.1| hypothetical protein DCAR_019324 [Daucus carota subsp. sativus] 8.6e-152	gi|960516259|gb|KU030844.1| Daucus carota laccase 1 mRNA, complete cds 0.0	pfam00394, Cu-oxidase, Multicopper oxidase. Many of the proteins in this family contain multiple similar copies of this plastocyanin-like domain. 4.45027e-19	sp|Q9FJD5|LAC17_ARATH Laccase-17 OS=Arabidopsis thaliana GN=LAC17 PE=2 SV=1 4.11555e-146	tr|A0A0U2US60|A0A0U2US60_DAUCA Laccase OS=Daucus carota PE=2 SV=1 2.1e-150	GO:0005507, copper ion binding;GO:0009698, phenylpropanoid metabolic process;GO:0009809, lignin biosynthetic process;GO:0016491, oxidoreductase activity;GO:0016722, oxidoreductase activity, oxidizing metal ions;GO:0046274, lignin catabolic process;GO:0048046, apoplast;GO:0052716, hydroquinone:oxygen oxidoreductase activity	-
TRINITY_DN92429_c0_g3	6.164937666669999	0.23788833333299997	4.69572988263	3.04434328426e-05	0.00259176155591	up	-	-	-	-	-	-	-	-	-
TRINITY_DN92650_c3_g1	122.418428333	28.1318659333	2.1215435992	0.000909424409113	0.02104505926	up	-	-	gi|1021053300|gb|KZN11078.1| hypothetical protein DCAR_003734 [Daucus carota subsp. sativus] 1.5e-59	-	-	sp|Q9LTZ9|GALS2_ARATH Galactan beta-1,4-galactosyltransferase GALS2 OS=Arabidopsis thaliana GN=GALS2 PE=2 SV=1 1.69044e-44	tr|A0A0L9TBG8|A0A0L9TBG8_PHAAN Uncharacterized protein OS=Phaseolus angularis GN=LR48_Vigan468s005400 PE=4 SV=1 9.9e-51	GO:0000139, Golgi membrane;GO:0005737, cytoplasm;GO:0005773, vacuole;GO:0016021, integral component of membrane;GO:0016757, transferase activity, transferring glycosyl groups;GO:0042546, cell wall biogenesis;GO:0071555, cell wall organization	-
TRINITY_DN84202_c0_g2	1.10096266667	9.81302633333	-3.1559325832800003	0.00234168407617	0.036582196377	down	-	-	-	-	-	-	-	-	-
TRINITY_DN68700_c3_g2	20.3713122633	1.75855333333	3.53407792297	2.73957500462e-05	0.00240874437783	up	-	-	-	-	-	-	-	-	-
TRINITY_DN96414_c1_g3	5.105859	0.057135000000000005	6.481635098940001	0.00018335509748900004	0.00807656379008	up	-	-	gi|1021038534|gb|KZM96317.1| hypothetical protein DCAR_019559 [Daucus carota subsp. sativus] 1.1e-25	-	-	-	tr|A0A068UPT2|A0A068UPT2_COFCA Uncharacterized protein OS=Coffea canephora GN=GSCOC_T00031315001 PE=4 SV=1 1.5e-19	-	-
TRINITY_DN76926_c0_g3	36.8717666667	10.35902	1.83162901768	0.00329266810385	0.044699410119099996	up	-	-	-	-	-	-	-	-	-
TRINITY_DN68279_c0_g1	0.887058333333	5.5982033	-2.65786299466	0.0037534263774499995	0.048212639351399994	down	cd00105, KH-I, K homology RNA-binding domain, type I. KH binds single-stranded RNA or DNA. It is found in a wide variety of proteins including ribosomal proteins, transcription factors and post-transcriptional modifiers of mRNA. There are two different KH domains that belong to different protein folds, but they share a single KH motif. The KH motif is folded into a beta alpha alpha beta unit. In …	KOG2190, KOG2190, KOG2190, PolyC-binding proteins alphaCP-1 and related KH domain proteins [RNA processing and modification, General function prediction only]. 3.43549e-38	gi|1021049265|gb|KZN07045.1| hypothetical protein DCAR_007882 [Daucus carota subsp. sativus] 1.0e-184	gi|731405161|ref|XM_002278331.2| PREDICTED: Vitis vinifera KH domain-containing protein At4g18375 (LOC100261680), mRNA 0.0	pfam00013, KH_1, KH domain. KH motifs bind RNA in vitro. Autoantibodies to Nova, a KH domain protein, cause paraneoplastic opsoclonus ataxia. 1.57861e-07	sp|P58223|Y4837_ARATH KH domain-containing protein At4g18375 OS=Arabidopsis thaliana GN=At4g18375 PE=2 SV=1 1.15527e-106	tr|A5ATM4|A5ATM4_VITVI Putative uncharacterized protein OS=Vitis vinifera GN=VITISV_042181 PE=4 SV=1 1.4e-141	GO:0003723, RNA binding;GO:0005634, nucleus	-
TRINITY_DN82378_c2_g1	5.8092321	0.025785766666700002	7.8156287210899995	0.000108258993264	0.00586993274246	up	-	-	-	-	-	-	-	-	-
TRINITY_DN94011_c0_g1	0.748746566667	6.198193666669999	-3.0492984459500003	0.00309043029937	0.043143150861	down	-	-	gi|1021027203|gb|KZM84990.1| hypothetical protein DCAR_027588 [Daucus carota subsp. sativus] 3.2e-43	gi|703144877|ref|XM_010110090.1| Morus notabilis Protein YIPF1-like protein partial mRNA 1.48122e-15	-	-	tr|A0A068TW19|A0A068TW19_COFCA Protein YIPF OS=Coffea canephora GN=GSCOC_T00029954001 PE=3 SV=1 1.4e-38	GO:0016021, integral component of membrane	-
TRINITY_DN98270_c1_g1	3.6217529218099997	29.4588701333	-3.0239420650300004	0.0009730291501739999	0.0217234246641	down	PLN03202, PLN03202, protein argonaute; Provisional. 5.39788e-57	KOG1041, KOG1041, KOG1041, Translation initiation factor 2C (eIF-2C) and related proteins [Translation, ribosomal structure and biogenesis]. 4.02254e-63	gi|565361253|ref|XP_006347371.1| PREDICTED: protein argonaute 1-like [Solanum tuberosum] 5.0e-188	gi|169788717|dbj|AB360853.1| Daucus carota mRNA for argonaute1, complete cds 8.79673e-123	pfam16486, ArgoN, N-terminal domain of argonaute. ArgoN is the N-terminal domain of argonaute proteins in eukaryotes. ArgoN is composed of an antiparallel four-stranded beta sheet core that has two alpha helices positioned along one face of the sheet and an extended beta strand towards its N-terminus. The core fold of the N domain most closely resembles the catalytic domain of replication-initiat…	sp|Q6EU14|AGO1A_ORYSJ Protein argonaute 1A OS=Oryza sativa subsp. japonica GN=AGO1A PE=2 SV=1 0.0	tr|A0A0V0IXE5|A0A0V0IXE5_SOLCH Uncharacterized protein OS=Solanum chacoense PE=3 SV=1 2.9e-188	GO:0003676, nucleic acid binding;GO:0031047, gene silencing by RNA	-
TRINITY_DN83500_c0_g1	65.3353488333	6.02600333333	3.4385903781400002	4.674717858030001e-06	0.000691698514587	up	cd06465, p23_hB-ind1_like, p23_like domain found in human (h) butyrate-induced transcript 1 (B-ind1) and similar proteins. hB-ind1 participates in signaling by the small GTPase Rac1. It binds to Rac1 and enhances different Rac1 effects including activation of nuclear factor (NF) kappaB and activation of c-Jun N-terminal kinase (JNK). hB-ind1 also plays a part in the RNA replication and particle p…	KOG3158, KOG3158, KOG3158, HSP90 co-chaperone p23 [Posttranslational modification, protein turnover, chaperones]. 1.18656e-19	gi|1021034873|gb|KZM92657.1| hypothetical protein DCAR_019978 [Daucus carota subsp. sativus] 1.2e-57	-	-	sp|P0C8Z0|Y8359_ORYSI Uncharacterized protein OsI_027940 OS=Oryza sativa subsp. indica GN=OsI_027940 PE=1 SV=2 1.96198e-38	tr|A0A124SGR6|A0A124SGR6_CYNCS CS domain-containing protein OS=Cynara cardunculus var. scolymus GN=Ccrd_014400 PE=4 SV=1 1.8e-50	GO:0005829, cytosol;GO:0005886, plasma membrane;GO:0009506, plasmodesma	-
TRINITY_DN85475_c1_g4	13.322566	0.597586666667	4.478580210880001	0.00160898823095	0.029358159696	up	-	-	-	-	-	-	-	-	-
TRINITY_DN79160_c1_g2	0.149780666667	7.56055	-5.65756786733	5.74107969687e-05	0.0038644902991700003	down	-	-	gi|1021046157|gb|KZN03938.1| hypothetical protein DCAR_012694 [Daucus carota subsp. sativus] 6.6e-31	-	-	sp|Q8RXE8|BASS3_ARATH Probable sodium/metabolite cotransporter BASS3, chloroplastic OS=Arabidopsis thaliana GN=BASS3 PE=2 SV=1 7.08584e-07	tr|A0A103XP11|A0A103XP11_CYNCS Bile acid:sodium symporter OS=Cynara cardunculus var. scolymus GN=Ccrd_003749 PE=4 SV=1 2.0e-11	GO:0005342, organic acid transmembrane transporter activity;GO:0005887, integral component of plasma membrane;GO:0009941, chloroplast envelope;GO:0016021, integral component of membrane	-
TRINITY_DN79160_c1_g1	2.3104257	11.519589133299998	-2.31785866106	0.0006523615664659999	0.017239808898700002	down	TIGR00841, Ileal_sodium/bile_acid_cotransporter, bile acid transporter. The Bile Acid:Na+ Symporter (BASS) Family (TC 2.A.28) Functionally characterized members of the BASS family catalyze Na+:bile acid symport. These systems have been identified in intestinal, liver and kidney tissues of animals. These symporters exhibit broad specificity, taking up a variety of non bile organic compounds as wel…	KOG2718, KOG2718, KOG2718, Na+-bile acid cotransporter [Inorganic ion transport and metabolism]. 3.6749e-06	gi|1021046157|gb|KZN03938.1| hypothetical protein DCAR_012694 [Daucus carota subsp. sativus] 1.7e-39	gi|971547617|ref|XM_006345654.2| PREDICTED: Solanum tuberosum probable sodium/metabolite cotransporter BASS3, chloroplastic (LOC102579409), mRNA 2.42922e-60	-	sp|Q8RXE8|BASS3_ARATH Probable sodium/metabolite cotransporter BASS3, chloroplastic OS=Arabidopsis thaliana GN=BASS3 PE=2 SV=1 1.75944e-36	tr|A0A103XP11|A0A103XP11_CYNCS Bile acid:sodium symporter OS=Cynara cardunculus var. scolymus GN=Ccrd_003749 PE=4 SV=1 1.2e-34	GO:0005342, organic acid transmembrane transporter activity;GO:0005887, integral component of plasma membrane;GO:0009941, chloroplast envelope;GO:0016021, integral component of membrane	-
TRINITY_DN98984_c5_g4	9.03592333333	0.0001	16.4633844096	5.63674401538e-06	0.0007840385032260001	up	-	-	-	-	-	-	-	-	-
TRINITY_DN95369_c0_g2	34.8780686667	6.09921443333	2.51562481122	0.00199228820073	0.033285253254900005	up	COG0542, clpA, ATP-binding subunits of Clp protease and DnaK/DnaJ chaperones [Posttranslational modification, protein turnover, chaperones]. 9.94005e-15	KOG1051, KOG1051, KOG1051, Chaperone HSP104 and related ATP-dependent Clp proteases [Posttranslational modification, protein turnover, chaperones]. 5.61376e-10	gi|502101810|ref|XP_004491879.1| PREDICTED: chaperone protein ClpB3, chloroplastic-like isoform X2 [Cicer arietinum] 1.9e-19	gi|590650581|ref|XM_007032614.1| Theobroma cacao Casein lytic proteinase B3 isoform 1 (TCM_018702) mRNA, complete cds 1.42607e-24	-	sp|Q9LF37|CLPB3_ARATH Chaperone protein ClpB3, chloroplastic OS=Arabidopsis thaliana GN=CLPB3 PE=2 SV=1 6.54598e-22	tr|A0A072U702|A0A072U702_MEDTR Casein lytic proteinase B3 OS=Medicago truncatula GN=MTR_7g012820 PE=3 SV=1 1.5e-19	GO:0005524, ATP binding;GO:0005737, cytoplasm;GO:0009408, response to heat;GO:0009507, chloroplast;GO:0009532, plastid stroma;GO:0009570, chloroplast stroma;GO:0009658, chloroplast organization;GO:0016485, protein processing	-
TRINITY_DN94117_c2_g3	14.142002466700001	0.588629333333	4.58648316753	6.09718533866e-05	0.0040208616045	up	-	-	-	-	-	-	-	-	-
TRINITY_DN78958_c0_g2	10.5126304333	147.903405607	-3.8144596665	0.00101953241868	0.022375480024099996	down	PTZ00361, PTZ00361, 26 proteosome regulatory subunit 4-like protein; Provisional. 1.22123e-91	KOG0726, KOG0726, KOG0726, 26S proteasome regulatory complex, ATPase RPT2 [Posttranslational modification, protein turnover, chaperones]. 1.6798e-93	gi|697164967|ref|XP_009591299.1| PREDICTED: 26S protease regulatory subunit 4 homolog [Nicotiana tomentosiformis] 6.9e-85	gi|566204978|ref|XM_002320581.2| Populus trichocarpa hypothetical protein (POPTR_0014s18530g) mRNA, complete cds 4.33881e-149	pfam00004, AAA, ATPase family associated with various cellular activities (AAA). AAA family proteins often perform chaperone-like functions that assist in the assembly, operation, or disassembly of protein complexes. 1.68769e-24	sp|Q9SZD4|PRS4A_ARATH 26S proteasome regulatory subunit 4 homolog A OS=Arabidopsis thaliana GN=RPT2A PE=1 SV=1 8.25378e-102	tr|A0A0V0I8R8|A0A0V0I8R8_SOLCH Putative 26S proteasome regulatory subunit 4-like (Fragment) OS=Solanum chacoense PE=3 SV=1 3.4e-84	GO:0000502, proteasome complex;GO:0005524, ATP binding;GO:0005634, nucleus;GO:0005737, cytoplasm;GO:0007292, female gamete generation;GO:0009408, response to heat;GO:0009933, meristem structural organization;GO:0009965, leaf morphogenesis;GO:0010015, root morphogenesis;GO:0010078, maintenance of root meristem identity;GO:0010311, lateral root formation;GO:0016020, membrane;GO:0016021, integral co…	-
TRINITY_DN78958_c0_g1	17.0641727998	138.618018845	-3.0220724190499997	0.00359963663749	0.04706241123430001	down	PTZ00361, PTZ00361, 26 proteosome regulatory subunit 4-like protein; Provisional. 6.14065e-56	KOG0726, KOG0726, KOG0726, 26S proteasome regulatory complex, ATPase RPT2 [Posttranslational modification, protein turnover, chaperones]. 3.97302e-57	gi|1021037520|gb|KZM95303.1| hypothetical protein DCAR_018545 [Daucus carota subsp. sativus] 9.2e-55	gi|731396325|ref|XM_002263298.3| PREDICTED: Vitis vinifera 26S proteasome regulatory subunit 4 homolog A-like (LOC100244194), mRNA 1.63419e-95	pfam00004, AAA, ATPase family associated with various cellular activities (AAA). AAA family proteins often perform chaperone-like functions that assist in the assembly, operation, or disassembly of protein complexes. 1.60631e-08	sp|P46466|PRS4_ORYSJ 26S protease regulatory subunit 4 homolog OS=Oryza sativa subsp. japonica GN=TBP2 PE=2 SV=2 6.84143e-61	tr|A0A0V0I8R8|A0A0V0I8R8_SOLCH Putative 26S proteasome regulatory subunit 4-like (Fragment) OS=Solanum chacoense PE=3 SV=1 9.1e-55	GO:0000502, proteasome complex;GO:0005524, ATP binding;GO:0005737, cytoplasm;GO:0008540, proteasome regulatory particle, base subcomplex;GO:0016021, integral component of membrane;GO:0016787, hydrolase activity;GO:0017025, TBP-class protein binding;GO:0030163, protein catabolic process;GO:0030433, ubiquitin-dependent ERAD pathway;GO:0031595, nuclear proteasome complex;GO:0031597, cytosolic protea…	-
TRINITY_DN96996_c2_g1	0.18086866666700002	15.698046666700002	-6.43949874324	1.3946602621099999e-08	8.627899680589999e-06	down	-	-	-	-	-	-	-	-	-
TRINITY_DN88508_c1_g1	11.25778	2.55816333333	2.13774207508	0.0021123039617500002	0.0344054484562	up	PTZ00236, PTZ00236, mitochondrial import inner membrane translocase subunit tim17; Provisional. 3.96158e-43	KOG1652, KOG1652, KOG1652, Mitochondrial import inner membrane translocase, subunit TIM17 [Intracellular trafficking, secretion, and vesicular transport]. 1.00296e-47	gi|565379179|ref|XP_006356014.1| PREDICTED: mitochondrial import inner membrane translocase subunit TIM17-2-like [Solanum tuberosum] 1.2e-71	gi|823259867|ref|XM_012607194.1| PREDICTED: Gossypium raimondii mitochondrial import inner membrane translocase subunit TIM17-2-like (LOC105782451), transcript variant X2, mRNA 1.82626e-56	pfam02466, Tim17, Tim17/Tim22/Tim23/Pmp24 family. The pre-protein translocase of the mitochondrial outer membrane (Tom) allows the import of pre-proteins from the cytoplasm. Tom forms a complex with a number of proteins, including Tim17. Tim17 and Tim23 are thought to form the translocation channel of the inner membrane. This family includes Tim17, Tim22 and Tim23. This family also includes Pmp24…	sp|Q9SP35|TI172_ARATH Mitochondrial import inner membrane translocase subunit TIM17-2 OS=Arabidopsis thaliana GN=TIM17-2 PE=1 SV=2 8.14642e-78	tr|M1BR14|M1BR14_SOLTU Uncharacterized protein OS=Solanum tuberosum GN=PGSC0003DMG400019767 PE=4 SV=1 9.3e-72	GO:0005739, mitochondrion;GO:0005741, mitochondrial outer membrane;GO:0005743, mitochondrial inner membrane;GO:0005744, mitochondrial inner membrane presequence translocase complex;GO:0006886, intracellular protein transport;GO:0015450, P-P-bond-hydrolysis-driven protein transmembrane transporter activity;GO:0016021, integral component of membrane;GO:0030150, protein import into mitochondrial mat…	-
TRINITY_DN80911_c2_g2	26.623292	4.81225733333	2.46790327598	0.000884027516572	0.020678710383	up	-	-	-	-	-	-	-	-	-
TRINITY_DN95729_c1_g3	2.996773	25.337760128600003	-3.07980728348	0.00025890303811200004	0.0099512216844	down	PLN02744, PLN02744, dihydrolipoyllysine-residue acetyltransferase component of pyruvate dehydrogenase complex. 3.57397e-81	KOG0557, KOG0557, KOG0557, Dihydrolipoamide acetyltransferase [Energy production and conversion]. 7.98224e-49	gi|753264471|gb|AJI44066.1| dihydrolipoyllysine-residue acetyltransferase [Paeonia suffruticosa] 3.3e-70	gi|566160764|ref|XM_006385347.1| Populus trichocarpa hypothetical protein (POPTR_0003s04140g) mRNA, complete cds 5.43822e-93	pfam02817, E3_binding, e3 binding domain. This family represents a small domain of the E2 subunit of 2-oxo-acid dehydrogenases responsible for the binding of the E3 subunit. 3.17677e-06	sp|Q8RWN9|ODP22_ARATH Dihydrolipoyllysine-residue acetyltransferase component 2 of pyruvate dehydrogenase complex, mitochondrial OS=Arabidopsis thaliana GN=At3g13930 PE=2 SV=2 4.36368e-75	tr|A0A126DHL8|A0A126DHL8_PAESU Dihydrolipoyllysine-residue acetyltransferase OS=Paeonia suffruticosa GN=PDH PE=2 SV=1 2.5e-70	GO:0004742, dihydrolipoyllysine-residue acetyltransferase activity;GO:0005507, copper ion binding;GO:0005739, mitochondrion;GO:0005759, mitochondrial matrix;GO:0006090, pyruvate metabolic process;GO:0006096, glycolytic process;GO:0009507, chloroplast;GO:0009941, chloroplast envelope;GO:0045254, pyruvate dehydrogenase complex	K00627-ko00620 Pyruvate metabolism;ko00020 Citrate cycle (TCA cycle);ko00010 Glycolysis / Gluconeogenesis;ko01200 Carbon metabolism
TRINITY_DN85901_c1_g1	27.680784999999997	1.48174386667	4.223516866040001	0.00147548164124	0.027958827587500002	up	-	-	-	-	-	-	-	-	-
TRINITY_DN93431_c0_g2	18.3288073333	1.07004033333	4.09837582921	0.0025734797851599996	0.0385529350565	up	-	-	-	-	-	-	-	-	-
TRINITY_DN99058_c4_g1	0.20099466666700003	5.511740333330001	-4.77727879649	0.000510904242271	0.014848683161200001	down	sd00004, PPR, Pentatricopeptide repeat, an RNA-binding module. The Pentatricopeptide repeat (PPR) is a 35-residue repeat motif that forms two anti-parallel alpha helices and binds single-stranded RNA in a sequence-specific and modular manner. It is present in a large family of RNA-binding proteins that are found in protists, fungi, and metazoan, but are most abundant in the mitochondria and chlor…	-	gi|720071828|ref|XP_010278176.1| PREDICTED: pentatricopeptide repeat-containing protein At5g55840-like [Nelumbo nucifera] 8.4e-25	-	pfam13041, PPR_2, PPR repeat family. This repeat has no known function. It is about 35 amino acids long and is found in up to 18 copies in some proteins. The family appears to be greatly expanded in plants and fungi. The repeat has been called PPR. 6.7579e-14	sp|Q9FIX3|PP407_ARATH Pentatricopeptide repeat-containing protein At5g39710 OS=Arabidopsis thaliana GN=EMB2745 PE=2 SV=1 5.37554e-23	tr|A0A061F307|A0A061F307_THECC Tetratricopeptide repeat (TPR)-like superfamily protein, putative OS=Theobroma cacao GN=TCM_046812 PE=4 SV=1 3.2e-24	GO:0005739, mitochondrion	-
TRINITY_DN84683_c2_g5	14.2789666667	1.04642866667	3.770345705	0.000177380320167	0.00786491020963	up	-	-	-	-	-	-	-	-	-
TRINITY_DN97134_c2_g1	8.56204266667	0.32019699999999995	4.74092332876	0.00215533683507	0.034830129185	up	-	-	-	-	-	-	-	-	-
TRINITY_DN87010_c0_g2	49.0478333333	580.417333333	-3.5648292915300006	0.000174414387208	0.007805528537979999	down	-	-	gi|1021051135|gb|KZN08913.1| hypothetical protein DCAR_001569 [Daucus carota subsp. sativus] 3.7e-20	gi|373939377|gb|JN591770.1| Daucus carota clone 7 isoflavone reductase-like protein mRNA, complete cds 7.55095e-50	-	sp|P52578|IFRH_SOLTU Isoflavone reductase homolog OS=Solanum tuberosum PE=2 SV=1 9.37005e-20	tr|H2DF86|H2DF86_DAUCA Isoflavone reductase-like protein OS=Daucus carota PE=2 SV=1 2.9e-20	GO:0005737, cytoplasm;GO:0016491, oxidoreductase activity	-
TRINITY_DN92713_c2_g1	89.7248	14.433096666700001	2.6361259343900003	0.0037674440066699996	0.0483045496413	up	cd02176, GH16_XET, Xyloglucan endotransglycosylase, member of glycosyl hydrolase family 16. Xyloglucan endotransglycosylases (XETs) cleave and religate xyloglucan polymers in plant cell walls via a transglycosylation mechanism. Xyloglucan is a soluble hemicellulose with a backbone of beta-1,4-linked glucose units, partially substituted with alpha-1,6-linked xylopyranose branches. It binds noncova…	-	gi|1021041545|gb|KZM99326.1| hypothetical protein DCAR_013312 [Daucus carota subsp. sativus] 5.0e-26	gi|747072052|ref|XM_011084623.1| PREDICTED: Sesamum indicum xyloglucan endotransglucosylase/hydrolase 2-like (LOC105165568), mRNA 5.55427e-19	-	sp|P35694|XTH2_SOYBN Xyloglucan endotransglucosylase/hydrolase 2 OS=Glycine max PE=2 SV=1 2.00104e-18	tr|A0A022QS82|A0A022QS82_ERYGU Xyloglucan endotransglucosylase/hydrolase OS=Erythranthe guttata GN=MIMGU_mgv1a011275mg PE=3 SV=1 1.3e-18	GO:0004553, hydrolase activity, hydrolyzing O-glycosyl compounds;GO:0005618, cell wall;GO:0010411, xyloglucan metabolic process;GO:0016762, xyloglucan:xyloglucosyl transferase activity;GO:0042546, cell wall biogenesis;GO:0048046, apoplast;GO:0071555, cell wall organization	-
TRINITY_DN96934_c2_g4	21.524855	5.8148666666699995	1.8881855025099998	0.00345176208238	0.046002484527	up	-	-	-	-	-	-	-	-	-
TRINITY_DN92634_c2_g6	14.5900376667	1.4910290000000002	3.2906033849000003	0.000457318739959	0.0139073283668	up	-	-	-	-	-	-	-	-	-
TRINITY_DN72926_c0_g4	64.9643416667	6.079483633330001	3.41762735595	0.0031535824576	0.0436960869664	up	-	-	-	-	-	-	-	-	-
TRINITY_DN93416_c0_g1	0.8632518939280001	7.819252499999999	-3.1791771968799996	0.00235724720113	0.0367193540633	down	PLN02646, PLN02646, argininosuccinate lyase. 2.21237e-35	KOG1316, KOG1316, KOG1316, Argininosuccinate lyase [Amino acid transport and metabolism]. 4.67182e-20	gi|1021042002|gb|KZM99783.1| hypothetical protein DCAR_012855 [Daucus carota subsp. sativus] 3.9e-41	gi|672125639|ref|XM_008788020.1| PREDICTED: Phoenix dactylifera argininosuccinate lyase, chloroplastic (LOC103704649), mRNA 3.25938e-30	-	sp|Q9LEU8|ARLY_ARATH Argininosuccinate lyase, chloroplastic OS=Arabidopsis thaliana GN=At5g10920 PE=2 SV=1 2.04808e-38	tr|A0A103XZC8|A0A103XZC8_CYNCS Argininosuccinate lyase (Fragment) OS=Cynara cardunculus var. scolymus GN=Ccrd_022086 PE=3 SV=1 2.6e-37	GO:0004056, argininosuccinate lyase activity;GO:0005829, cytosol;GO:0006526, arginine biosynthetic process;GO:0009507, chloroplast;GO:0009570, chloroplast stroma;GO:0042450, arginine biosynthetic process via ornithine;GO:0051262, protein tetramerization	K01755-ko01230 Biosynthesis of amino acids;ko00250 Alanine, aspartate and glutamate metabolism;ko00220 Arginine biosynthesis
TRINITY_DN89669_c0_g4	0.176056	164.229816667	-9.86546596819	5.49322271495e-08	2.62370049923e-05	down	-	-	-	-	-	-	-	-	-
TRINITY_DN89669_c0_g1	3.73739376667	112.554268333	-4.912444386040001	0.00011318870147700001	0.006011773084069999	down	-	-	-	-	-	-	-	-	-
TRINITY_DN89669_c0_g2	0.0001	183.414956667	-20.8066798584	1.0721839659200001e-08	6.82802488965e-06	down	-	-	gi|585218|sp|P37704.1|GRP7_DAUCA RecName: Full=Glycine-rich protein DC7.1; Flags: Precursor [Daucus carota] 7.2e-07	-	-	sp|P37704|GRP7_DAUCA Glycine-rich protein DC7.1 OS=Daucus carota PE=2 SV=1 2.36245e-12	-	-	-
TRINITY_DN96278_c1_g2	0.615801666667	6.042467	-3.2946000118	0.00269039429321	0.0395768739892	down	-	KOG0128, KOG0128, KOG0128, RNA-binding protein SART3 (RRM superfamily) [RNA processing and modification]. 1.34143e-18	gi|1026079420|ref|XP_016538941.1| PREDICTED: squamous cell carcinoma antigen recognized by T-cells 3 [Capsicum annuum] 2.9e-69	-	-	sp|Q15020|SART3_HUMAN Squamous cell carcinoma antigen recognized by T-cells 3 OS=Homo sapiens GN=SART3 PE=1 SV=1 2.51268e-27	tr|A0A0V0IVH5|A0A0V0IVH5_SOLCH Putative squamous cell carcinoma antigen recognized by T-cells 3-like OS=Solanum chacoense PE=4 SV=1 2.1e-67	GO:0000166, nucleotide binding;GO:0000244, spliceosomal tri-snRNP complex assembly;GO:0000245, spliceosomal complex assembly;GO:0000387, spliceosomal snRNP assembly;GO:0000398, mRNA splicing, via spliceosome;GO:0000902, cell morphogenesis;GO:0003676, nucleic acid binding;GO:0005634, nucleus;GO:0005654, nucleoplasm;GO:0005737, cytoplasm;GO:0006334, nucleosome assembly;GO:0006397, mRNA processing;G…	-
TRINITY_DN90315_c1_g1	2.05081538	32.1768976667	-3.9717557080000003	0.00117415068277	0.024235559549	down	PLN02183, PLN02183, ferulate 5-hydroxylase. 1.63665e-58	KOG0156, KOG0156, KOG0156, Cytochrome P450 CYP2 subfamily [Secondary metabolites biosynthesis, transport and catabolism]. 1.11489e-37	gi|1021048164|gb|KZN05944.1| hypothetical protein DCAR_006781 [Daucus carota subsp. sativus] 1.1e-109	-	pfam00067, p450, Cytochrome P450. Cytochrome P450s are haem-thiolate proteins involved in the oxidative degradation of various compounds. They are particularly well known for their role in the degradation of environmental toxins and mutagens. They can be divided into 4 classes, according to the method by which electrons from NAD(P)H are delivered to the catalytic site. Sequence conservation is re…	sp|Q8VWZ7|C76B6_CATRO Geraniol 8-hydroxylase OS=Catharanthus roseus GN=CYP76B6 PE=1 SV=1 7.8542e-84	tr|A0A118JWD7|A0A118JWD7_CYNCS Uncharacterized protein OS=Cynara cardunculus var. scolymus GN=Ccrd_002490 PE=4 SV=1 1.7e-62	GO:0005506, iron ion binding;GO:0005789, endoplasmic reticulum membrane;GO:0016021, integral component of membrane;GO:0016099, monoterpenoid biosynthetic process;GO:0016705, oxidoreductase activity, acting on paired donors, with incorporation or reduction of molecular oxygen;GO:0016709, oxidoreductase activity, acting on paired donors, with incorporation or reduction of molecular oxygen, NAD(P)H …	-
TRINITY_DN98397_c3_g1	449.54179333300004	54.9369466667	3.0326066131200005	1.28961279519e-05	0.0013938332502000002	up	cd08295, double_bond_reductase_like, Arabidopsis alkenal double bond reductase and leukotriene B4 12-hydroxydehydrogenase. This group includes proteins identified as the Arabidopsis alkenal double bond reductase and leukotriene B4 12-hydroxydehydrogenase. The Arabidopsis enzyme, a member of the medium chain dehydrogenase/reductase family, catalyzes the reduction of 7-8-double bond of phenylpropan…	KOG1196, KOG1196, KOG1196, Predicted NAD-dependent oxidoreductase [General function prediction only]. 3.04529e-58	gi|1021028864|gb|KZM86649.1| hypothetical protein DCAR_023783 [Daucus carota subsp. sativus] 1.0e-54	gi|590654196|ref|XM_007033570.1| Theobroma cacao Zinc-binding dehydrogenase family protein (TCM_019792) mRNA, complete cds 1.38509e-45	-	sp|Q9SLN8|DBR_TOBAC 2-alkenal reductase (NADP(+)-dependent) OS=Nicotiana tabacum GN=DBR PE=1 SV=1 2.55634e-59	tr|A0A059AZY6|A0A059AZY6_EUCGR Uncharacterized protein OS=Eucalyptus grandis GN=EUGRSUZ_H01876 PE=4 SV=1 9.1e-51	GO:0008270, zinc ion binding;GO:0016491, oxidoreductase activity	-
TRINITY_DN73944_c3_g2	11.405363333299999	92.449	-3.0189453080199997	0.00211905041682	0.0344548580539	down	PLN02255, PLN02255, H(+) -translocating inorganic pyrophosphatase. 2.28388e-143	-	gi|1021042802|gb|KZN00583.1| hypothetical protein DCAR_009337 [Daucus carota subsp. sativus] 9.0e-133	gi|1025390734|ref|XM_016579619.1| PREDICTED: Nicotiana tabacum pyrophosphate-energized vacuolar membrane proton pump-like (LOC107761395), mRNA 0.0	pfam03030, H_PPase, Inorganic H+ pyrophosphatase. The H+ pyrophosphatase is an transmembrane proton pump involved in establishing the H+ electrochemical potential difference between the vacuole lumen and the cell cytosol. Vacuolar-type H(+)-translocating inorganic pyrophosphatases have long been considered to be restricted to plants and to a few species of photo-trophic bacteria. However, in rece…	sp|P21616|AVP_VIGRR Pyrophosphate-energized vacuolar membrane proton pump OS=Vigna radiata var. radiata PE=1 SV=4 4.04834e-149	tr|V9LL45|V9LL45_IPOBA Pyrophosphate-energized vacuolar membrane proteon pump 1 OS=Ipomoea batatas PE=2 SV=1 2.1e-121	GO:0004427, inorganic diphosphatase activity;GO:0005774, vacuolar membrane;GO:0009678, hydrogen-translocating pyrophosphatase activity;GO:0016021, integral component of membrane;GO:0046872, metal ion binding	-
TRINITY_DN73944_c3_g6	0.420278	7.98447	-4.24778080254	6.77163299893e-05	0.00432806215442	down	PLN02255, PLN02255, H(+) -translocating inorganic pyrophosphatase. 9.22408e-93	-	gi|1021030665|gb|KZM88450.1| hypothetical protein DCAR_025525 [Daucus carota subsp. sativus] 8.5e-94	gi|1027858965|ref|NM_001325961.1| Nicotiana tabacum pyrophosphate-energized vacuolar membrane proton pump-like (LOC107815824), mRNA 1.65451e-100	pfam03030, H_PPase, Inorganic H+ pyrophosphatase. The H+ pyrophosphatase is an transmembrane proton pump involved in establishing the H+ electrochemical potential difference between the vacuole lumen and the cell cytosol. Vacuolar-type H(+)-translocating inorganic pyrophosphatases have long been considered to be restricted to plants and to a few species of photo-trophic bacteria. However, in rece…	sp|P21616|AVP_VIGRR Pyrophosphate-energized vacuolar membrane proton pump OS=Vigna radiata var. radiata PE=1 SV=4 2.00679e-102	tr|I1KGY6|I1KGY6_SOYBN Uncharacterized protein OS=Glycine max GN=GLYMA_07G028500 PE=3 SV=1 1.4e-83	GO:0004427, inorganic diphosphatase activity;GO:0005774, vacuolar membrane;GO:0009678, hydrogen-translocating pyrophosphatase activity;GO:0016021, integral component of membrane;GO:0046872, metal ion binding	-
TRINITY_DN77767_c0_g1	30.639307300000002	1.3922383333300001	4.459905572559999	8.39936228368e-06	0.00103528913826	up	-	-	-	-	-	-	-	-	-
TRINITY_DN95151_c3_g4	16.574688000000002	3.71046736667	2.15930888968	0.00401185277255	0.049942108192099995	up	-	-	gi|1021052177|gb|KZN09955.1| hypothetical protein DCAR_002611 [Daucus carota subsp. sativus] 1.6e-12	-	-	sp|Q8VYE2|TIM50_ARATH Mitochondrial import inner membrane translocase subunit TIM50 OS=Arabidopsis thaliana GN=TIM50 PE=1 SV=1 6.9977e-08	tr|D7UAF4|D7UAF4_VITVI Putative uncharacterized protein OS=Vitis vinifera GN=VIT_19s0015g00260 PE=4 SV=1 9.8e-10	GO:0004721, phosphoprotein phosphatase activity;GO:0005739, mitochondrion;GO:0005743, mitochondrial inner membrane;GO:0005744, mitochondrial inner membrane presequence translocase complex;GO:0016021, integral component of membrane;GO:0030150, protein import into mitochondrial matrix	-
TRINITY_DN98149_c1_g2	30.2736176667	9.340427	1.6965006763400001	0.00246498995066	0.0376041221759	up	-	-	-	-	-	-	-	-	-
TRINITY_DN95612_c0_g3	0.9012008	7.641655900000001	-3.0839647959400005	0.0017960114200299998	0.031352731472900006	down	PLN03131, PLN03131, hypothetical protein; Provisional. 3.37541e-52	KOG0702, KOG0702, KOG0702, Predicted GTPase-activating protein [Signal transduction mechanisms]. 4.7577e-11	gi|1021042553|gb|KZN00334.1| hypothetical protein DCAR_009088 [Daucus carota subsp. sativus] 1.3e-26	gi|566199779|ref|XM_006375866.1| Populus trichocarpa hypothetical protein (POPTR_0013s06460g) mRNA, complete cds 5.48881e-53	-	sp|Q8RXE7|AGD14_ARATH Probable ADP-ribosylation factor GTPase-activating protein AGD14 OS=Arabidopsis thaliana GN=AGD14 PE=1 SV=2 3.37636e-41	tr|A0A067L550|A0A067L550_JATCU Uncharacterized protein OS=Jatropha curcas GN=JCGZ_02645 PE=4 SV=1 2.4e-25	GO:0005096, GTPase activator activity;GO:0046872, metal ion binding	-
TRINITY_DN73762_c0_g4	5.018819000000001	0.890681	2.49436719338	0.00184417814085	0.031896878611599996	up	-	-	gi|902225391|gb|KNA20051.1| hypothetical protein SOVF_055940 [Spinacia oleracea] 5.6e-13	-	-	-	tr|A0A0K9RKL1|A0A0K9RKL1_SPIOL Uncharacterized protein OS=Spinacia oleracea GN=SOVF_055940 PE=4 SV=1 4.3e-13	-	-
TRINITY_DN73762_c0_g2	72.3941513333	8.90657213333	3.02293095324	0.00027309015179100005	0.0103435084489	up	-	-	-	-	-	-	-	-	-
TRINITY_DN73418_c0_g3	48.720945	2.768321	4.13745897114	3.71659065104e-05	0.0029694782154899998	up	pfam11744, ALMT, Aluminium activated malate transporter. 1.82726e-15	KOG4711, KOG4711, KOG4711, Predicted membrane protein [General function prediction only]. 2.19916e-06	gi|1021031756|gb|KZM89540.1| hypothetical protein DCAR_023097 [Daucus carota subsp. sativus] 5.3e-62	-	pfam11744, ALMT, Aluminium activated malate transporter. 3.91555e-16	sp|Q9SJE9|ALMT1_ARATH Aluminum-activated malate transporter 1 OS=Arabidopsis thaliana GN=ALMT1 PE=1 SV=1 2.97989e-31	tr|B9HQ63|B9HQ63_POPTR Uncharacterized protein (Fragment) OS=Populus trichocarpa GN=POPTR_0009s02300g PE=4 SV=2 7.4e-24	GO:0005886, plasma membrane;GO:0009705, plant-type vacuole membrane;GO:0010044, response to aluminum ion;GO:0015140, malate transmembrane transporter activity;GO:0016021, integral component of membrane;GO:0044148, positive regulation of growth of symbiont involved in interaction with host;GO:0071423, malate transmembrane transport	-
TRINITY_DN73418_c0_g4	5.983493	0.151404333333	5.30450953405	0.00031500096426599996	0.0112470430956	up	-	-	-	-	-	-	-	-	-
TRINITY_DN78985_c2_g1	52.489154000000006	12.196675666700001	2.1055313654	0.00138367335085	0.026877772084699998	up	-	KOG4698, KOG4698, KOG4698, Uncharacterized conserved protein [Function unknown]. 1.26352e-103	gi|1021041250|gb|KZM99031.1| hypothetical protein DCAR_013607 [Daucus carota subsp. sativus] 6.3e-231	gi|590635674|ref|XM_007028623.1| Theobroma cacao JHL06B08.8 protein (TCM_024584) mRNA, complete cds 1.25232e-61	-	-	tr|A0A067DSC6|A0A067DSC6_CITSI Uncharacterized protein OS=Citrus sinensis GN=CISIN_1g008862mg PE=4 SV=1 2.9e-175	GO:0016021, integral component of membrane;GO:0016757, transferase activity, transferring glycosyl groups	-
TRINITY_DN75647_c0_g1	25.0514211333	5.6807166666699995	2.14074759434	0.0011306022603499999	0.023751788818	up	-	KOG0737, KOG0737, KOG0737, AAA+-type ATPase [Posttranslational modification, protein turnover, chaperones]. 8.29831e-09	gi|1026036665|ref|XP_016564487.1| PREDICTED: uncharacterized protein LOC107863184 isoform X2 [Capsicum annuum] 4.7e-19	gi|1027104779|ref|XM_008236588.2| PREDICTED: Prunus mume putative cell division cycle ATPase (LOC103333694), mRNA 2.12552e-41	-	sp|Q9FFS0|RTNLD_ARATH Reticulon-like protein B4 OS=Arabidopsis thaliana GN=RTNLB4 PE=1 SV=1 5.53068e-08	tr|M1BRP3|M1BRP3_SOLTU Uncharacterized protein OS=Solanum tuberosum GN=PGSC0003DMG400019963 PE=4 SV=1 7.9e-19	GO:0005783, endoplasmic reticulum;GO:0005789, endoplasmic reticulum membrane;GO:0005886, plasma membrane;GO:0009506, plasmodesma;GO:0071458, integral component of cytoplasmic side of endoplasmic reticulum membrane;GO:0071782, endoplasmic reticulum tubular network;GO:0071786, endoplasmic reticulum tubular network organization	-
TRINITY_DN77995_c1_g1	16.160766666700003	0.0001	17.3021361156	3.48481149576e-05	0.00284375502928	up	-	-	-	-	-	-	-	-	-
TRINITY_DN86484_c0_g1	187.742136667	27.4986533333	2.77131960993	4.32441973685e-05	0.0032700970063600002	up	-	-	gi|1021054188|gb|KZN11966.1| hypothetical protein DCAR_004622 [Daucus carota subsp. sativus] 1.5e-18	gi|970043963|ref|XM_015227903.1| PREDICTED: Solanum pennellii BTB/POZ domain-containing protein At5g41330 (LOC107026814), mRNA 1.76624e-25	-	sp|Q9FN67|Y5133_ARATH BTB/POZ domain-containing protein At5g41330 OS=Arabidopsis thaliana GN=At5g41330 PE=2 SV=1 9.99013e-12	tr|A0A067JN47|A0A067JN47_JATCU Uncharacterized protein OS=Jatropha curcas GN=JCGZ_20572 PE=4 SV=1 2.1e-17	GO:0016567, protein ubiquitination;GO:0051260, protein homooligomerization	-
TRINITY_DN64382_c0_g1	19.5368333333	4.14826666667	2.23561609987	0.0011554379765199999	0.0240120606069	up	-	-	-	-	-	-	-	-	-
TRINITY_DN87724_c1_g2	46.7477533333	1.61924866667	4.851500570440001	1.02396641397e-06	0.00023840066793	up	-	-	-	-	-	-	-	-	-
TRINITY_DN92593_c1_g4	0.942553333333	19.6645	-4.38287543981	0.0022077635421199997	0.0353399941857	down	-	-	-	-	-	-	-	-	-
TRINITY_DN84523_c1_g1	1.44287036667	15.342811	-3.41054923413	0.0025589517694	0.0383992915015	down	-	-	gi|1021050856|gb|KZN08634.1| hypothetical protein DCAR_001164 [Daucus carota subsp. sativus] 4.0e-65	gi|1029127693|ref|XM_016886711.1| PREDICTED: Gossypium hirsutum protein GIGANTEA-like (LOC107951610), transcript variant X4, mRNA 4.94713e-123	-	sp|Q9SQI2|GIGAN_ARATH Protein GIGANTEA OS=Arabidopsis thaliana GN=GI PE=1 SV=2 3.58669e-69	tr|A0A103XZ62|A0A103XZ62_CYNCS GIGANTEA-like protein OS=Cynara cardunculus var. scolymus GN=Ccrd_022186 PE=4 SV=1 2.6e-64	GO:0005634, nucleus;GO:0005654, nucleoplasm;GO:0005737, cytoplasm;GO:0006355, regulation of transcription, DNA-templated;GO:0007623, circadian rhythm;GO:0009409, response to cold;GO:0009585, red, far-red light phototransduction;GO:0009637, response to blue light;GO:0009908, flower development;GO:0010218, response to far red light;GO:0010378, temperature compensation of the circadian clock;GO:0016…	-
TRINITY_DN91186_c2_g1	305.208629767	0.0001	21.5413643242	3.17780297303e-26	2.06420547719e-21	up	-	-	-	gi|159459642|gb|AC214029.1| Populus trichocarpa clone POP033-H19, complete sequence 4.68615e-13	-	-	-	-	-
TRINITY_DN78791_c2_g6	32.7083333333	4.32839333333	2.91775473616	1.07959556258e-05	0.00124119095502	up	-	-	-	-	-	-	-	-	-
TRINITY_DN83890_c0_g1	9.544043499999999	1.80476813333	2.40278711908	0.0011577217292	0.024026239732900002	up	-	-	-	-	-	-	-	-	-
TRINITY_DN77931_c0_g1	51.31797	11.7111506667	2.13158126917	0.000134552910834	0.006597966498620001	up	PLN03185, PLN03185, phosphatidylinositol phosphate kinase; Provisional. 4.27081e-24	KOG0229, KOG0229, KOG0229, Phosphatidylinositol-4-phosphate 5-kinase [Signal transduction mechanisms]. 3.29305e-27	gi|1021023391|gb|KZM81184.1| hypothetical protein DCAR_031245 [Daucus carota subsp. sativus] 1.9e-45	gi|566147568|ref|XM_002297702.2| Populus trichocarpa phosphatidylinositol-4-phosphate 5-kinase family protein (POPTR_0001s06520g) mRNA, complete cds 5.55109e-15	-	sp|Q56YP2|PI5K1_ARATH Phosphatidylinositol 4-phosphate 5-kinase 1 OS=Arabidopsis thaliana GN=PIP5K1 PE=1 SV=1 4.60287e-44	tr|A0A087HJ68|A0A087HJ68_ARAAL Uncharacterized protein OS=Arabis alpina GN=AALP_AA2G220100 PE=4 SV=1 1.3e-41	GO:0003785, actin monomer binding;GO:0005524, ATP binding;GO:0005886, plasma membrane;GO:0016307, phosphatidylinositol phosphate kinase activity;GO:0016308, 1-phosphatidylinositol-4-phosphate 5-kinase activity;GO:0051015, actin filament binding	-
TRINITY_DN76246_c1_g1	10.850166133299998	88.580028	-3.02926432046	0.00127511972826	0.0255247926622	down	PTZ00335, PTZ00335, tubulin alpha chain; Provisional. 6.46917e-41	KOG1376, KOG1376, KOG1376, Alpha tubulin [Cytoskeleton]. 3.97706e-36	gi|1021051545|gb|KZN09323.1| hypothetical protein DCAR_001979 [Daucus carota subsp. sativus] 1.8e-37	gi|565487268|ref|XM_006301212.1| Capsella rubella hypothetical protein (CARUB_v10021674mg) mRNA, complete cds 6.23797e-37	pfam00091, Tubulin, Tubulin/FtsZ family, GTPase domain. This family includes the tubulin alpha, beta and gamma chains, as well as the bacterial FtsZ family of proteins. Members of this family are involved in polymer formation. FtsZ is the polymer-forming protein of bacterial cell division. It is part of a ring in the middle of the dividing cell that is required for constriction of cell membrane a…	sp|P33628|TBA_PICAB Tubulin alpha chain (Fragment) OS=Picea abies GN=TUBA PE=2 SV=1 3.26725e-41	tr|A0A060ID32|A0A060ID32_PANGI Tubulin alpha-1 chain OS=Panax ginseng GN=TUBa PE=2 SV=1 1.1e-36	GO:0003924, GTPase activity;GO:0005200, structural constituent of cytoskeleton;GO:0005525, GTP binding;GO:0005737, cytoplasm;GO:0005874, microtubule;GO:0007017, microtubule-based process	-
TRINITY_DN77500_c1_g1	5.545566333330001	0.07476793333330001	6.212771334990001	4.94605863439e-06	0.000717145381058	up	pfam14009, DUF4228, Domain of unknown function (DUF4228). This domain is found in plants. The function is not known. 8.77773e-12	-	gi|1021044415|gb|KZN02196.1| hypothetical protein DCAR_010950 [Daucus carota subsp. sativus] 1.2e-48	-	pfam14009, DUF4228, Domain of unknown function (DUF4228). This domain is found in plants. The function is not known. 2.09707e-12	-	tr|M5VRF9|M5VRF9_PRUPE Uncharacterized protein OS=Prunus persica GN=PRUPE_ppa012673mg PE=4 SV=1 8.1e-29	-	-
TRINITY_DN97341_c0_g1	81.7581316667	15.821639666700001	2.3694631078	0.0035224273519099997	0.0465810898815	up	PLN02248, PLN02248, cellulose synthase-like protein. 0.0	-	gi|1021040280|gb|KZM98061.1| hypothetical protein DCAR_014577 [Daucus carota subsp. sativus] 3.5e-238	gi|123690630|emb|AM457009.1| Vitis vinifera contig VV78X275353.2, whole genome shotgun sequence 0.0	pfam03552, Cellulose_synt, Cellulose synthase. Cellulose, an aggregate of unbranched polymers of beta-1,4-linked glucose residues, is the major component of wood and thus paper, and is synthesized by plants, most algae, some bacteria and fungi, and even some animals. The genes that synthesize cellulose in higher plants differ greatly from the well-characterized genes found in Acetobacter and Agro…	sp|Q9M9M4|CSLD3_ARATH Cellulose synthase-like protein D3 OS=Arabidopsis thaliana GN=CSLD3 PE=1 SV=1 0.0	tr|A0A067JP46|A0A067JP46_JATCU Uncharacterized protein OS=Jatropha curcas GN=JCGZ_00552 PE=3 SV=1 3.6e-227	GO:0000139, Golgi membrane;GO:0005768, endosome;GO:0005783, endoplasmic reticulum;GO:0005794, Golgi apparatus;GO:0005802, trans-Golgi network;GO:0005886, plasma membrane;GO:0009409, response to cold;GO:0016021, integral component of membrane;GO:0016760, cellulose synthase (UDP-forming) activity;GO:0030244, cellulose biosynthetic process;GO:0051753, mannan synthase activity;GO:0071555, cell wall o…	-
TRINITY_DN77372_c0_g4	23.122181100000002	5.19254936667	2.15476256047	0.0008246630560000001	0.019904578106500002	up	TIGR00983, 3a0801s02tim23, mitochondrial import inner membrane translocase subunit tim23. [Transport and binding proteins, Amino acids, peptides and amines]. 4.89207e-21	KOG3324, KOG3324, KOG3324, Mitochondrial import inner membrane translocase, subunit TIM23 [Intracellular trafficking, secretion, and vesicular transport]. 1.11521e-38	gi|1021042662|gb|KZN00443.1| hypothetical protein DCAR_009197 [Daucus carota subsp. sativus] 3.3e-82	-	pfam02466, Tim17, Tim17/Tim22/Tim23/Pmp24 family. The pre-protein translocase of the mitochondrial outer membrane (Tom) allows the import of pre-proteins from the cytoplasm. Tom forms a complex with a number of proteins, including Tim17. Tim17 and Tim23 are thought to form the translocation channel of the inner membrane. This family includes Tim17, Tim22 and Tim23. This family also includes Pmp24…	sp|Q9S837|TI233_ARATH Mitochondrial import inner membrane translocase subunit TIM23-3 OS=Arabidopsis thaliana GN=TIM23-3 PE=2 SV=1 8.25671e-53	tr|D7SV51|D7SV51_VITVI Putative uncharacterized protein OS=Vitis vinifera GN=VIT_04s0008g06730 PE=4 SV=1 1.4e-59	GO:0005744, mitochondrial inner membrane presequence translocase complex;GO:0030150, protein import into mitochondrial matrix;GO:0031305, integral component of mitochondrial inner membrane	K17794-ko04212 Longevity regulating pathway - worm
TRINITY_DN82575_c0_g5	61.8199766667	0.954274	6.01752573375	2.59283282661e-09	2.12812465025e-06	up	pfam13966, zf-RVT, zinc-binding in reverse transcriptase. This domain would appear to be a zinc-binding region of a putative reverse transcriptase. 9.39452e-10	-	gi|802585655|ref|XP_012070547.1| PREDICTED: uncharacterized protein LOC105632718 [Jatropha curcas] 2.4e-68	-	pfam13966, zf-RVT, zinc-binding in reverse transcriptase. This domain would appear to be a zinc-binding region of a putative reverse transcriptase. 2.24443e-10	sp|P0C2F6|RNHX1_ARATH Putative ribonuclease H protein At1g65750 OS=Arabidopsis thaliana GN=At1g65750 PE=3 SV=1 2.30854e-19	tr|B9S8Y3|B9S8Y3_RICCO Nucleic acid binding protein, putative OS=Ricinus communis GN=RCOM_0836990 PE=4 SV=1 1.6e-56	GO:0003676, nucleic acid binding;GO:0004523, RNA-DNA hybrid ribonuclease activity;GO:0046872, metal ion binding	-
TRINITY_DN88182_c1_g1	5.392428	0.7734683333329999	2.80152087614	0.00299982882265	0.0424069381573	up	-	-	-	-	-	-	-	-	-
TRINITY_DN83082_c1_g3	28.4511926667	3.93807163333	2.8529278720599995	0.00038431382447000003	0.0126207649626	up	-	-	-	-	-	-	-	-	-
TRINITY_DN91164_c1_g1	16.4189896667	2.8376776	2.532582761	0.000991266104159	0.0220007522112	up	-	-	-	-	-	-	-	-	-
TRINITY_DN88796_c0_g4	50.481508000000005	3.372729	3.90376670056	0.00185231024136	0.0319491546331	up	-	-	-	-	-	-	-	-	-
TRINITY_DN96084_c2_g1	2.92576746667	13.5219556333	-2.20841680164	0.00397248934542	0.049703921478000006	down	cd12690, RRM3_PTBPH1_PTBPH2, RNA recognition motif 3 in plant polypyrimidine tract-binding protein homolog 1 and 2 (PTBPH1 and PTBPH2). This subfamily corresponds to the RRM3 of PTBPH1 and PTBPH2. Although their biological roles remain unclear, PTBPH1 and PTBPH2 show significant sequence similarity to polypyrimidine tract binding protein (PTB) that is an important negative regulator of alternativ…	KOG1190, KOG1190, KOG1190, Polypyrimidine tract-binding protein [RNA processing and modification]. 2.20192e-28	gi|595931018|ref|XP_007215290.1| hypothetical protein PRUPE_ppa004961mg [Prunus persica] 1.7e-103	gi|595931017|ref|XM_007215228.1| Prunus persica hypothetical protein (PRUPE_ppa004961mg) mRNA, complete cds 3.60767e-147	-	sp|Q9MAC5|PTBP1_ARATH Polypyrimidine tract-binding protein homolog 1 OS=Arabidopsis thaliana GN=PTB PE=1 SV=1 1.50732e-115	tr|M5WS48|M5WS48_PRUPE Uncharacterized protein OS=Prunus persica GN=PRUPE_ppa004961mg PE=4 SV=1 1.3e-103	GO:0000166, nucleotide binding;GO:0000381, regulation of alternative mRNA splicing, via spliceosome;GO:0000932, P-body;GO:0003676, nucleic acid binding;GO:0003723, RNA binding;GO:0005634, nucleus;GO:0005737, cytoplasm;GO:0006397, mRNA processing;GO:0006417, regulation of translation;GO:0008380, RNA splicing;GO:0009845, seed germination;GO:0043484, regulation of RNA splicing	-
TRINITY_DN75137_c0_g1	19.8786896667	4.3832102	2.18116289154	0.00217227727767	0.035015742286	up	PLN03023, PLN03023, Expansin-like B1; Provisional. 3.82551e-83	-	gi|1021049714|gb|KZN07494.1| hypothetical protein DCAR_008331 [Daucus carota subsp. sativus] 1.1e-93	-	-	sp|O23547|EXLB1_ARATH Expansin-like B1 OS=Arabidopsis thaliana GN=EXLB1 PE=2 SV=2 3.83469e-59	tr|A0A103XRI9|A0A103XRI9_CYNCS Barwin-like endoglucanase OS=Cynara cardunculus var. scolymus GN=Ccrd_002375 PE=3 SV=1 3.5e-73	GO:0005576, extracellular region;GO:0019953, sexual reproduction	-
TRINITY_DN96442_c1_g3	6.092038	0.0859956666667	6.14651716661	1.0068245036e-05	0.00117951943555	up	-	-	-	-	-	-	-	-	-
TRINITY_DN81104_c0_g2	8.54567333333	60.693666666700004	-2.82827990555	0.00127011973705	0.0254481466558	down	-	-	gi|1021041648|gb|KZM99429.1| hypothetical protein DCAR_013209 [Daucus carota subsp. sativus] 1.2e-69	-	-	-	tr|A0A068UZN2|A0A068UZN2_COFCA Uncharacterized protein OS=Coffea canephora GN=GSCOC_T00038800001 PE=4 SV=1 1.6e-50	-	-
TRINITY_DN95632_c3_g1	461.613763333	83.20545899999999	2.47193614968	0.00128696854713	0.0256724605455	up	PLN02412, PLN02412, probable glutathione peroxidase. 3.84626e-24	KOG1651, KOG1651, KOG1651, Glutathione peroxidase [Posttranslational modification, protein turnover, chaperones]. 5.32062e-21	gi|1021048128|gb|KZN05908.1| hypothetical protein DCAR_006745 [Daucus carota subsp. sativus] 1.6e-24	gi|507118466|gb|KC542392.1| Eleutherococcus senticosus glutathione peroxidase (GPX) mRNA, partial cds 9.6741e-36	pfam00255, GSHPx, Glutathione peroxidase. 2.63578e-08	sp|Q9LEF0|GPX4_MESCR Probable phospholipid hydroperoxide glutathione peroxidase OS=Mesembryanthemum crystallinum GN=GPXMC1 PE=2 SV=1 7.13817e-27	tr|R4USJ3|R4USJ3_9APIA Glutathione peroxidase (Fragment) OS=Eleutherococcus senticosus GN=GPX PE=2 SV=1 4.6e-24	GO:0004602, glutathione peroxidase activity;GO:0005737, cytoplasm;GO:0006979, response to oxidative stress;GO:0047066, phospholipid-hydroperoxide glutathione peroxidase activity	-
TRINITY_DN80494_c0_g1	0.2552063	6.438128666669999	-4.656905560619999	0.0018139724245200002	0.0315573308613	down	cd01366, KISc_C_terminal, Kinesin motor domain, KIFC2/KIFC3/ncd-like carboxy-terminal kinesins. Kinesin motor domain, KIFC2/KIFC3/ncd-like carboxy-terminal kinesins. Ncd is a spindle motor protein necessary for chromosome segregation in meiosis. KIFC2/KIFC3-like kinesins have been implicated in motility of the Golgi apparatus as well as dentritic and axonal transport in neurons. This catalytic (h…	KOG0239, KOG0239, KOG0239, Kinesin (KAR3 subfamily) [Cytoskeleton]. 1.96109e-29	gi|1021053015|gb|KZN10793.1| hypothetical protein DCAR_003449 [Daucus carota subsp. sativus] 1.3e-269	gi|697139326|ref|XR_690495.1| PREDICTED: Nicotiana tomentosiformis kinesin-like protein KCA2 (LOC104114908), transcript variant X2, misc_RNA 3.33946e-140	pfam00225, Kinesin, Kinesin motor domain. 5.13046e-29	sp|Q9FKP4|KCA2_ARATH Kinesin-like protein KCA2 OS=Arabidopsis thaliana GN=KCA2 PE=1 SV=1 0.0	tr|F6I1W4|F6I1W4_VITVI Putative uncharacterized protein (Fragment) OS=Vitis vinifera GN=VIT_00s0313g00080 PE=3 SV=1 1.8e-194	GO:0003777, microtubule motor activity;GO:0005524, ATP binding;GO:0005871, kinesin complex;GO:0005874, microtubule;GO:0005886, plasma membrane;GO:0007018, microtubule-based movement;GO:0009903, chloroplast avoidance movement;GO:0009904, chloroplast accumulation movement;GO:0016887, ATPase activity	-
TRINITY_DN73758_c0_g2	11.3056833333	1.52447233333	2.89066632033	0.000988558569555	0.0219684567234	up	cd11019, OsENODL1_like, Early nodulin-like protein (OsENODL1) and similar proteins. This family includes early nodulin-like protein (OsENODL1) from Oryza sativa and similar proteins. It belongs to the phytocyanin family of blue copper proteins, a ubiquitous family of plant cupredoxins. Phytocyanin is involved in electron transfer reactions with the Cu center transitioning between the oxidized Cu(…	-	gi|1021047917|gb|KZN05697.1| hypothetical protein DCAR_006534 [Daucus carota subsp. sativus] 8.3e-31	gi|1026075501|ref|XM_016726650.1| PREDICTED: Capsicum annuum stellacyanin (LOC107879680), mRNA 2.50275e-13	-	sp|Q9SK27|ENL1_ARATH Early nodulin-like protein 1 OS=Arabidopsis thaliana GN=At2g25060 PE=1 SV=2 2.46452e-10	tr|D7TVP7|D7TVP7_VITVI Putative uncharacterized protein OS=Vitis vinifera GN=VIT_02s0025g02410 PE=4 SV=1 5.0e-20	GO:0005886, plasma membrane;GO:0009055, electron transfer activity;GO:0009506, plasmodesma;GO:0031225, anchored component of membrane;GO:0046658, anchored component of plasma membrane	-
TRINITY_DN85738_c0_g1	1.01402863333	9.909507333330001	-3.2887149427599995	0.000463127436655	0.014024880607399998	down	pfam06972, DUF1296, Protein of unknown function (DUF1296). This family represents a conserved region approximately 60 residues long within a number of plant proteins of unknown function. Structural modelling suggests this domain may bind nucleic acids. 1.39002e-16	-	gi|1009172003|ref|XP_015867038.1| PREDICTED: uncharacterized protein LOC107404589 isoform X1 [Ziziphus jujuba] 4.3e-33	gi|566193392|ref|XM_002317268.2| Populus trichocarpa kinase-related family protein (POPTR_0011s02850g) mRNA, complete cds 2.03731e-45	pfam06972, DUF1296, Protein of unknown function (DUF1296). This family represents a conserved region approximately 60 residues long within a number of plant proteins of unknown function. Structural modelling suggests this domain may bind nucleic acids. 3.32087e-17	-	tr|A0A103XV55|A0A103XV55_CYNCS Uncharacterized protein OS=Cynara cardunculus var. scolymus GN=Ccrd_000485 PE=4 SV=1 1.4e-31	-	-
TRINITY_DN87135_c0_g2	60.6836706667	8.82242	2.7820620066400004	0.000626073920735	0.0168260688882	up	-	-	-	-	-	-	-	-	-
TRINITY_DN98508_c6_g2	140.349324333	26.9433666667	2.38102008157	0.00219090462612	0.0351891947258	up	-	-	gi|1021054316|gb|KZN12094.1| hypothetical protein DCAR_004750 [Daucus carota subsp. sativus] 3.2e-21	-	-	sp|Q38931|FKB62_ARATH Peptidyl-prolyl cis-trans isomerase FKBP62 OS=Arabidopsis thaliana GN=FKBP62 PE=1 SV=2 8.29865e-14	tr|B9T7Z2|B9T7Z2_RICCO Peptidylprolyl isomerase, putative OS=Ricinus communis GN=RCOM_0242150 PE=4 SV=1 6.2e-17	GO:0003755, peptidyl-prolyl cis-trans isomerase activity;GO:0005528, FK506 binding;GO:0005634, nucleus;GO:0005789, endoplasmic reticulum membrane;GO:0006457, protein folding;GO:0061077, chaperone-mediated protein folding;GO:0070370, cellular heat acclimation	K09571-ko04915 Estrogen signaling pathway
TRINITY_DN86821_c0_g3	0.598186	7.1075967666699995	-3.5706957846699994	0.00148492055651	0.028041413595599998	down	PLN02922, PLN02922, prenyltransferase. 3.29894e-22	-	gi|1021053277|gb|KZN11055.1| hypothetical protein DCAR_003711 [Daucus carota subsp. sativus] 1.0e-43	gi|743899639|ref|XM_011044805.1| PREDICTED: Populus euphratica 1,4-dihydroxy-2-naphthoate polyprenyltransferase, chloroplastic (LOC105138653), transcript variant X2, mRNA 2.40241e-21	-	sp|Q0WUA3|MENA_ARATH 2-carboxy-1,4-naphthoquinone phytyltransferase, chloroplastic OS=Arabidopsis thaliana GN=ABC4 PE=1 SV=2 5.97549e-39	tr|G7JCR2|G7JCR2_MEDTR 1,4-dihydroxy-2-naphthoate octaprenyltransferase OS=Medicago truncatula GN=MTR_4g094100 PE=3 SV=2 7.6e-31	GO:0004659, prenyltransferase activity;GO:0009507, chloroplast;GO:0009772, photosynthetic electron transport in photosystem II;GO:0010236, plastoquinone biosynthetic process;GO:0016021, integral component of membrane;GO:0031969, chloroplast membrane;GO:0042372, phylloquinone biosynthetic process;GO:0046428, 1,4-dihydroxy-2-naphthoate octaprenyltransferase activity	-
TRINITY_DN70949_c1_g3	8.82477091667	56.5362443333	-2.67954531616	0.00203271839381	0.0335959209486	down	PLN02638, PLN02638, cellulose synthase A (UDP-forming), catalytic subunit. 1.37965e-95	-	gi|1021024272|gb|KZM82060.1| hypothetical protein DCAR_029673 [Daucus carota subsp. sativus] 1.7e-72	gi|764622918|ref|XM_004306488.2| PREDICTED: Fragaria vesca subsp. vesca cellulose synthase A catalytic subunit 3 [UDP-forming] (LOC101296424), mRNA 4.62003e-69	pfam14569, zf-UDP, Zinc-binding RING-finger. This RING/U-box type zinc-binding domain is frequently found in the catalytic subunit (irx3) of cellulose synthase. The enzymic class is EC:2.4.1.12, whereby the synthase removes the glucose from UDP-glucose and adds it to the growing cellulose, thereby releasing UDP. The domain-structure is treble-clef like (PDB:1weo). 1.54315e-32	sp|Q941L0|CESA3_ARATH Cellulose synthase A catalytic subunit 3 [UDP-forming] OS=Arabidopsis thaliana GN=CESA3 PE=1 SV=2 3.46209e-81	tr|M5X614|M5X614_PRUPE Cellulose synthase OS=Prunus persica GN=PRUPE_ppa000593mg PE=3 SV=1 2.2e-64	GO:0005768, endosome;GO:0005794, Golgi apparatus;GO:0005802, trans-Golgi network;GO:0005886, plasma membrane;GO:0006952, defense response;GO:0008270, zinc ion binding;GO:0009506, plasmodesma;GO:0009833, plant-type primary cell wall biogenesis;GO:0009834, plant-type secondary cell wall biogenesis;GO:0016021, integral component of membrane;GO:0016760, cellulose synthase (UDP-forming) activity;GO:00…	-
TRINITY_DN73476_c0_g1	10.8746928667	0.33875156666699996	5.0046032266600005	5.35269556989e-05	0.00368674356835	up	cd00265, MADS_MEF2_like, MEF2 (myocyte enhancer factor 2)-like/Type II subfamily of MADS ( MCM1, Agamous, Deficiens, and SRF (serum response factor) box family of eukaryotic transcriptional regulators. Binds DNA and exists as hetero and homo-dimers. Differs from SRF-like/Type I subgroup mainly in position of the alpha helix responsible for the dimerization interface. Important in homeotic regulat…	KOG0014, KOG0014, KOG0014, MADS box transcription factor [Transcription]. 4.17925e-22	gi|1021051040|gb|KZN08818.1| hypothetical protein DCAR_001474 [Daucus carota subsp. sativus] 2.7e-42	gi|922366370|ref|XM_013599899.1| Medicago truncatula MADS-box transcription factor mRNA 9.01787e-52	pfam00319, SRF-TF, SRF-type transcription factor (DNA-binding and dimerization domain). 9.8959e-14	sp|Q2QW55|MAD33_ORYSJ MADS-box transcription factor 33 OS=Oryza sativa subsp. japonica GN=MADS33 PE=2 SV=2 5.22482e-46	tr|D7U912|D7U912_VITVI Putative uncharacterized protein OS=Vitis vinifera GN=VIT_18s0041g02140 PE=4 SV=1 5.1e-33	GO:0003677, DNA binding;GO:0003700, DNA binding transcription factor activity;GO:0005634, nucleus;GO:0006351, transcription, DNA-templated;GO:0010228, vegetative to reproductive phase transition of meristem;GO:0048364, root development	-
TRINITY_DN86113_c1_g3	22.9466586667	0.202824	6.821911908080001	0.000243683625415	0.00958169325428	up	-	-	-	-	-	-	-	-	-
TRINITY_DN69017_c3_g3	340.108333333	64.1376333333	2.40675133069	0.00035743486125999996	0.0120675136605	up	cd01803, Ubiquitin, Ubiquitin. Ubiquitin (includes Ubq/RPL40e and Ubq/RPS27a fusions as well as homopolymeric multiubiquitin protein chains). 3.79157e-46	KOG0003, KOG0003, KOG0003, Ubiquitin/60s ribosomal protein L40 fusion [Translation, ribosomal structure and biogenesis]. 3.60724e-48	gi|226502871|ref|NP_001148453.1| uncharacterized protein LOC100282068 [Zea mays] 5.5e-45	gi|729395287|ref|XM_010554703.1| PREDICTED: Tarenaya hassleriana polyubiquitin-like (LOC104823235), mRNA 6.10932e-75	pfam00240, ubiquitin, Ubiquitin family. This family contains a number of ubiquitin-like proteins: SUMO (smt3 homologue), Nedd8, Elongin B, Rub1, and Parkin. A number of them are thought to carry a distinctive five-residue motif termed the proteasome-interacting motif (PIM), which may have a biologically significant role in protein delivery to proteasomes and recruitment of proteasomes to transcri…	sp|P0CG83|UBIQP_HORVU Polyubiquitin (Fragment) OS=Hordeum vulgare PE=2 SV=1 4.09661e-59	tr|G7JDW9|G7JDW9_MEDTR Polyubiquitin 3 OS=Medicago truncatula GN=MTR_4g081010 PE=4 SV=2 4.2e-45	GO:0005634, nucleus;GO:0005737, cytoplasm	-
TRINITY_DN82372_c0_g4	156.640666667	38.8524	2.0113831852	0.000831900248996	0.0199918757459	up	-	-	gi|1021032881|gb|KZM90665.1| hypothetical protein DCAR_021970 [Daucus carota subsp. sativus] 1.5e-06	-	-	-	-	-	-
TRINITY_DN93041_c0_g1	10.946827	0.0001	16.740153231500003	0.000642654377895	0.0170665987019	up	-	-	-	-	-	-	-	-	-
TRINITY_DN98213_c2_g1	1.7578650000000002	14.6481423333	-3.0588215305400004	0.0025102281765199998	0.0380308310339	down	pfam04053, Coatomer_WDAD, Coatomer WD associated region. This region is composed of WD40 repeats. 3.12287e-33	KOG0276, KOG0276, KOG0276, Vesicle coat complex COPI, beta' subunit [Intracellular trafficking, secretion, and vesicular transport]. 1.70401e-46	gi|1021031451|gb|KZM89236.1| hypothetical protein DCAR_026311 [Daucus carota subsp. sativus] 4.5e-44	gi|985430538|ref|XR_369343.2| PREDICTED: Citrus sinensis coatomer subunit beta'-2-like (LOC102622899), transcript variant X4, misc_RNA 4.42508e-75	pfam04053, Coatomer_WDAD, Coatomer WD associated region. This region is composed of WD40 repeats. 6.9709e-34	sp|Q5VQ78|COB21_ORYSJ Coatomer subunit beta'-1 OS=Oryza sativa subsp. japonica GN=Os06g0143900 PE=2 SV=1 4.92594e-73	tr|A0A0A0K788|A0A0A0K788_CUCSA Uncharacterized protein OS=Cucumis sativus GN=Csa_7G446655 PE=4 SV=1 3.8e-43	GO:0005198, structural molecule activity;GO:0006886, intracellular protein transport;GO:0006888, ER to Golgi vesicle-mediated transport;GO:0006890, retrograde vesicle-mediated transport, Golgi to ER;GO:0006891, intra-Golgi vesicle-mediated transport;GO:0016192, vesicle-mediated transport;GO:0030117, membrane coat;GO:0030126, COPI vesicle coat	-
TRINITY_DN85649_c2_g1	0.327143166667	10.671397500000001	-5.02768317396	0.00115091553843	0.023953867552099998	down	PLN00113, PLN00113, leucine-rich repeat receptor-like protein kinase; Provisional. 7.86071e-06	-	gi|1021051441|gb|KZN09219.1| hypothetical protein DCAR_001875 [Daucus carota subsp. sativus] 2.6e-25	-	-	sp|Q9LT96|Y5977_ARATH Probable leucine-rich repeat receptor-like protein kinase At5g49770 OS=Arabidopsis thaliana GN=At5g49770 PE=2 SV=1 1.82518e-17	tr|A0A059B8V3|A0A059B8V3_EUCGR Uncharacterized protein (Fragment) OS=Eucalyptus grandis GN=EUGRSUZ_G00040 PE=3 SV=1 1.1e-23	GO:0004674, protein serine/threonine kinase activity;GO:0005524, ATP binding;GO:0016021, integral component of membrane	-
TRINITY_DN78483_c3_g3	149.916632633	21.6798269333	2.7897353082	0.000523922202061	0.015091979813399999	up	-	-	gi|357515297|ref|XP_003627937.1| hypothetical protein MTR_8g040260 [Medicago truncatula] 9.6e-19	gi|1001179177|emb|LT160758.1| Acinetobacter johnsonii partial 16S rRNA gene, strain 1109-1-F1 0.0	-	-	tr|G7LHI8|G7LHI8_MEDTR Uncharacterized protein OS=Medicago truncatula GN=MTR_8g040260 PE=4 SV=1 7.3e-19	-	-
TRINITY_DN70628_c4_g1	0.6821001	14.8217473333	-4.44158825241	0.00025108933970299996	0.009768686631249999	down	-	-	-	-	-	-	-	-	-
TRINITY_DN98614_c2_g1	1.93709536667	25.0749529	-3.6942801036699997	1.16429102166e-06	0.00026346725713	down	-	KOG1336, KOG1336, KOG1336, Monodehydroascorbate/ferredoxin reductase [General function prediction only]. 4.24407e-13	gi|1021046952|gb|KZN04732.1| hypothetical protein DCAR_005569 [Daucus carota subsp. sativus] 1.2e-80	gi|1000984143|ref|XM_002509810.2| PREDICTED: Ricinus communis monodehydroascorbate reductase 5, mitochondrial (LOC8287431), mRNA 3.44819e-76	-	sp|P92947|MDAR5_ARATH Monodehydroascorbate reductase 5, mitochondrial OS=Arabidopsis thaliana GN=MDAR5 PE=1 SV=3 1.92624e-67	tr|D9IZZ1|D9IZZ1_SOLLC Monodehydroascorbate reductase OS=Solanum lycopersicum var. cerasiforme GN=slc-MDHAR PE=2 SV=1 5.0e-74	GO:0005524, ATP binding;GO:0005739, mitochondrion;GO:0009409, response to cold;GO:0009507, chloroplast;GO:0009570, chloroplast stroma;GO:0010319, stromule;GO:0016491, oxidoreductase activity;GO:0016656, monodehydroascorbate reductase (NADH) activity;GO:0046686, response to cadmium ion	K08232-ko00053 Ascorbate and aldarate metabolism
TRINITY_DN79362_c2_g3	156.266	22.0720333333	2.8237124685	7.81769803906e-05	0.00475177446624	up	-	-	-	-	-	-	-	-	-
TRINITY_DN93993_c0_g2	0.0001	11.2712166667	-16.7822837295	4.93623903733e-05	0.00353910904137	down	-	-	-	-	-	-	-	-	-
TRINITY_DN81667_c1_g1	0.16995196666700002	31.880216100000002	-7.551390541749999	2.49412383875e-07	7.86460204823e-05	down	-	-	gi|1021043252|gb|KZN01033.1| hypothetical protein DCAR_009787 [Daucus carota subsp. sativus] 8.2e-12	-	-	-	tr|A0A0B2SBC8|A0A0B2SBC8_GLYSO Secologanin synthase OS=Glycine soja GN=glysoja_039974 PE=3 SV=1 7.8e-07	GO:0003997, acyl-CoA oxidase activity;GO:0004497, monooxygenase activity;GO:0005506, iron ion binding;GO:0016021, integral component of membrane;GO:0016705, oxidoreductase activity, acting on paired donors, with incorporation or reduction of molecular oxygen;GO:0020037, heme binding	-
TRINITY_DN75728_c0_g1	109.302935033	23.3824333333	2.22483516184	0.00132480807986	0.0261534739373	up	-	KOG0004, KOG0004, KOG0004, Ubiquitin/40S ribosomal protein S27a fusion [Translation, ribosomal structure and biogenesis]. 1.83768e-07	gi|672195153|ref|XP_008776477.1| PREDICTED: ubiquitin-40S ribosomal protein S27a-like [Phoenix dactylifera] 4.4e-11	-	-	sp|P62981|RS27A_SOLTU Ubiquitin-40S ribosomal protein S27a OS=Solanum tuberosum GN=UBI3 PE=2 SV=2 2.38538e-10	tr|A5AGV0|A5AGV0_VITVI Putative uncharacterized protein OS=Vitis vinifera GN=VITISV_027093 PE=4 SV=1 3.7e-10	GO:0003735, structural constituent of ribosome;GO:0005634, nucleus;GO:0005840, ribosome;GO:0006412, translation;GO:0046872, metal ion binding	-
TRINITY_DN89675_c0_g1	0.793512934351	6.1890223333300005	-2.96338588352	0.000453720593647	0.0138628074325	down	cd09862, PIN_Rrp44, PIN domain of yeast exosome subunit Rrp44 endoribonuclease and other eukaryotic homologs. PIN (PilT N terminus) domain of the Saccharomyces cerevisiae exosome subunit Rrp44 (Ribosomal RNA-processing protein 44 or Protein Dis3 homolog) and other similar eukaryotic homologs are included in this family. The eukaryotic exosome is a conserved macromolecular complex responsible for …	KOG2102, KOG2102, KOG2102, Exosomal 3'-5' exoribonuclease complex, subunit Rrp44/Dis3 [Translation, ribosomal structure and biogenesis]. 6.85429e-82	gi|1021038055|gb|KZM95838.1| hypothetical protein DCAR_019080 [Daucus carota subsp. sativus] 3.8e-219	gi|731397527|ref|XM_002276903.2| PREDICTED: Vitis vinifera exosome complex exonuclease RRP44 (LOC100267912), mRNA 0.0	pfam00773, RNB, RNB domain. This domain is the catalytic domain of ribonuclease II. 4.29933e-07	sp|Q9SHL7|RP44A_ARATH Exosome complex exonuclease RRP44 homolog A OS=Arabidopsis thaliana GN=RRP44A PE=2 SV=2 0.0	tr|D7SWC0|D7SWC0_VITVI Putative uncharacterized protein OS=Vitis vinifera GN=VIT_07s0031g02190 PE=3 SV=1 1.9e-191	GO:0000175, 3'-5'-exoribonuclease activity;GO:0000176, nuclear exosome (RNase complex);GO:0000177, cytoplasmic exosome (RNase complex);GO:0000178, exosome (RNase complex);GO:0003723, RNA binding;GO:0004519, endonuclease activity;GO:0004527, exonuclease activity;GO:0005634, nucleus;GO:0006364, rRNA processing;GO:0006402, mRNA catabolic process;GO:0016075, rRNA catabolic process;GO:0046872, metal i…	K12585-ko03018 RNA degradation
TRINITY_DN91878_c0_g1	0.043612666666699995	18.2372923333	-8.70792862932	0.00017683349377300002	0.00786294185058	down	-	-	-	-	-	-	-	-	-
TRINITY_DN94956_c0_g3	7.58015	0.39545333333300003	4.260647037219999	0.0024167629623300002	0.0372003961479	up	-	-	-	-	-	-	-	-	-
TRINITY_DN97498_c0_g1	0.0001	18.1996133333	-17.4735482739	0.00119262454147	0.0244721693647	down	-	-	-	-	-	-	-	-	-
TRINITY_DN92321_c1_g1	7.6220797000000005	0.0001	16.217897073299998	0.000150658048476	0.007096660518359999	up	-	-	-	-	-	-	-	-	-
TRINITY_DN71216_c0_g2	20.9426526667	6.49267502667	1.6895592843599998	0.0011240312075799998	0.0236443313312	up	-	-	gi|970009041|ref|XP_015065383.1| PREDICTED: DNA ligase 1 [Solanum pennellii] 2.7e-11	-	-	-	tr|K4B953|K4B953_SOLLC Uncharacterized protein OS=Solanum lycopersicum PE=4 SV=1 2.7e-11	-	-
TRINITY_DN98771_c4_g5	14.1123496667	0.17209793333299997	6.35758462975	0.00019338334004400003	0.008286857743619999	up	-	-	gi|743912495|ref|XP_011000130.1| PREDICTED: polyadenylate-binding protein 8-like [Populus euphratica] 1.6e-08	-	-	-	tr|A0A061DZV7|A0A061DZV7_THECC Polyadenylate-binding protein OS=Theobroma cacao GN=TCM_007096 PE=3 SV=1 2.7e-08	GO:0000166, nucleotide binding;GO:0003723, RNA binding;GO:0005829, cytosol	-
TRINITY_DN71344_c0_g3	13.41823	3.77298633333	1.83041559857	0.0029979463171	0.042405889463300005	up	-	-	-	-	-	-	-	-	-
TRINITY_DN97639_c2_g2	2.30536313333	15.0969593333	-2.7111920844200004	0.00310034018018	0.043216480061	down	PLN02610, PLN02610, probable methionyl-tRNA synthetase. 8.58165e-141	KOG1247, KOG1247, KOG1247, Methionyl-tRNA synthetase [Translation, ribosomal structure and biogenesis]. 4.02096e-102	gi|1021028158|gb|KZM85945.1| hypothetical protein DCAR_026633 [Daucus carota subsp. sativus] 5.5e-120	gi|802588849|ref|XM_012215720.1| PREDICTED: Jatropha curcas probable methionine--tRNA ligase (LOC105633157), mRNA 7.3018e-164	pfam09334, tRNA-synt_1g, tRNA synthetases class I (M). This family includes methionyl tRNA synthetases. 2.9238e-70	sp|Q9SVN5|SYMC_ARATH Methionine--tRNA ligase, cytoplasmic OS=Arabidopsis thaliana GN=At4g13780 PE=2 SV=1 1.51458e-134	tr|A0A103YFP8|A0A103YFP8_CYNCS Aminoacyl-tRNA synthetase, class 1a, anticodon-binding OS=Cynara cardunculus var. scolymus GN=Ccrd_013373 PE=3 SV=1 2.2e-113	GO:0000049, tRNA binding;GO:0004825, methionine-tRNA ligase activity;GO:0005524, ATP binding;GO:0005737, cytoplasm;GO:0005829, cytosol;GO:0006418, tRNA aminoacylation for protein translation;GO:0006431, methionyl-tRNA aminoacylation;GO:0046686, response to cadmium ion	-
TRINITY_DN85042_c0_g3	42.6944666667	4.81848666667	3.14739708617	0.000811183000837	0.0196718399908	up	-	-	-	-	-	-	-	-	-
TRINITY_DN99060_c11_g1	0.267433933333	6.470413666669999	-4.5966035111800005	0.0036231676435000003	0.0472481465539	down	-	-	gi|1012336623|gb|KYP47918.1| Retrovirus-related Pol polyprotein from transposon TNT 1-94 [Cajanus cajan] 2.3e-50	-	pfam00665, rve, Integrase core domain. Integrase mediates integration of a DNA copy of the viral genome into the host chromosome. Integrase is composed of three domains. The amino-terminal domain is a zinc binding domain pfam02022. This domain is the central catalytic domain. The carboxyl terminal domain that is a non-specific DNA binding domain pfam00552. The catalytic domain acts as an endonucl…	sp|P10978|POLX_TOBAC Retrovirus-related Pol polyprotein from transposon TNT 1-94 OS=Nicotiana tabacum PE=2 SV=1 5.69998e-25	tr|Q7XPF2|Q7XPF2_ORYSJ OSJNBa0060N03.9 protein OS=Oryza sativa subsp. japonica GN=OSJNBa0060N03.9 PE=4 SV=2 2.5e-49	GO:0003676, nucleic acid binding;GO:0003964, RNA-directed DNA polymerase activity;GO:0004190, aspartic-type endopeptidase activity;GO:0004519, endonuclease activity;GO:0005524, ATP binding;GO:0005737, cytoplasm;GO:0008270, zinc ion binding;GO:0015074, DNA integration;GO:0016301, kinase activity;GO:0016773, phosphotransferase activity, alcohol group as acceptor	-
TRINITY_DN88460_c0_g4	1.15014566667	9.45021333333	-3.03853030677	0.00131767267998	0.026062076880900002	down	TIGR01243, Cell_division_cycle_protein_48_homolog_MJ1156, AAA family ATPase, CDC48 subfamily. This subfamily of the AAA family ATPases includes two members each from three archaeal species. It also includes yeast CDC48 (cell division control protein 48) and the human ortholog, transitional endoplasmic reticulum ATPase (valosin-containing protein). These proteins in eukaryotes are involved in the …	KOG0741, KOG0741, KOG0741, AAA+-type ATPase [Posttranslational modification, protein turnover, chaperones]. 2.61359e-65	gi|1021038525|gb|KZM96308.1| hypothetical protein DCAR_019550 [Daucus carota subsp. sativus] 2.0e-109	gi|1025197275|ref|XM_016620669.1| PREDICTED: Nicotiana tabacum vesicle-fusing ATPase-like (LOC107797742), transcript variant X2, mRNA 1.61068e-139	pfam00004, AAA, ATPase family associated with various cellular activities (AAA). AAA family proteins often perform chaperone-like functions that assist in the assembly, operation, or disassembly of protein complexes. 5.05355e-11	sp|Q9M0Y8|NSF_ARATH Vesicle-fusing ATPase OS=Arabidopsis thaliana GN=NSF PE=2 SV=2 7.4558e-122	tr|I1KLJ1|I1KLJ1_SOYBN Uncharacterized protein OS=Glycine max GN=GLYMA_07G195900 PE=4 SV=1 9.2e-99	GO:0005524, ATP binding;GO:0005773, vacuole;GO:0005794, Golgi apparatus;GO:0005795, Golgi stack;GO:0005886, plasma membrane;GO:0006891, intra-Golgi vesicle-mediated transport;GO:0009506, plasmodesma;GO:0016887, ATPase activity;GO:0043001, Golgi to plasma membrane protein transport;GO:0046872, metal ion binding;GO:0048211, Golgi vesicle docking	K06027-ko04727 GABAergic synapse;ko04962 Vasopressin-regulated water reabsorption;ko04721 Synaptic vesicle cycle
TRINITY_DN69637_c0_g2	0.396034666667	5.903916666669999	-3.8979737315900005	0.00040852763453900007	0.0129830543882	down	pfam01602, Adaptin_N, Adaptin N terminal region. This family consists of the N terminal region of various alpha, beta and gamma subunits of the AP-1, AP-2 and AP-3 adaptor protein complexes. The adaptor protein (AP) complexes are involved in the formation of clathrin-coated pits and vesicles. The N-terminal region of the various adaptor proteins (APs) is constant by comparison to the C-terminal w…	KOG1058, KOG1058, KOG1058, Vesicle coat complex COPI, beta subunit [Intracellular trafficking, secretion, and vesicular transport]. 7.03544e-98	gi|1021043583|gb|KZN01364.1| hypothetical protein DCAR_010118 [Daucus carota subsp. sativus] 1.1e-127	gi|950822759|gb|KR340135.1| Jasminum sambac microsatellite Js994 sequence 8.17799e-14	pfam01602, Adaptin_N, Adaptin N terminal region. This family consists of the N terminal region of various alpha, beta and gamma subunits of the AP-1, AP-2 and AP-3 adaptor protein complexes. The adaptor protein (AP) complexes are involved in the formation of clathrin-coated pits and vesicles. The N-terminal region of the various adaptor proteins (APs) is constant by comparison to the C-terminal w…	sp|Q9SV21|COPB1_ARATH Coatomer subunit beta-1 OS=Arabidopsis thaliana GN=At4g31480 PE=2 SV=2 3.36261e-141	tr|A0A0B0NWU7|A0A0B0NWU7_GOSAR Coatomer subunit beta OS=Gossypium arboreum GN=F383_23779 PE=4 SV=1 9.7e-124	GO:0005198, structural molecule activity;GO:0006886, intracellular protein transport;GO:0016192, vesicle-mediated transport;GO:0030126, COPI vesicle coat	-
TRINITY_DN76064_c1_g1	1.92492066667	37.5582383333	-4.28625850189	0.00112161427851	0.0236342597202	down	cd01803, Ubiquitin, Ubiquitin. Ubiquitin (includes Ubq/RPL40e and Ubq/RPS27a fusions as well as homopolymeric multiubiquitin protein chains). 3.37969e-11	KOG0003, KOG0003, KOG0003, Ubiquitin/60s ribosomal protein L40 fusion [Translation, ribosomal structure and biogenesis]. 2.52827e-12	gi|731417327|ref|XP_002267206.2| PREDICTED: polyubiquitin-C-like [Vitis vinifera] 8.1e-09	gi|590607612|ref|XM_007020971.1| Theobroma cacao Polyubiquitin 10 isoform 1 (TCM_031075) mRNA, complete cds 2.29686e-30	-	sp|P69310|UBIQ_AVESA Ubiquitin OS=Avena sativa PE=1 SV=1 3.75448e-11	tr|F6H5Z7|F6H5Z7_VITVI Putative uncharacterized protein OS=Vitis vinifera GN=VIT_14s0036g00930 PE=4 SV=1 6.1e-09	GO:0005634, nucleus;GO:0005737, cytoplasm	-
TRINITY_DN94980_c0_g1	0.0001	8.75961333333	-16.4185795674	0.00308183151919	0.0430782081461	down	-	-	-	-	-	-	-	-	-
TRINITY_DN96508_c0_g1	1.1562210333299998	9.487128199999999	-3.03655422009	0.000311600336068	0.011190045366700001	down	PLN00207, PLN00207, polyribonucleotide nucleotidyltransferase; Provisional. 2.72712e-125	KOG1067, KOG1067, KOG1067, Predicted RNA-binding polyribonucleotide nucleotidyltransferase [General function prediction only]. 1.26325e-53	gi|1021035934|gb|KZM93717.1| hypothetical protein DCAR_016962 [Daucus carota subsp. sativus] 1.6e-110	gi|802585343|ref|XM_012214986.1| PREDICTED: Jatropha curcas polyribonucleotide nucleotidyltransferase 1, chloroplastic (LOC105632574), transcript variant X2, mRNA 2.57571e-131	pfam01138, RNase_PH, 3' exoribonuclease family, domain 1. This family includes 3'-5' exoribonucleases. Ribonuclease PH contains a single copy of this domain, and removes nucleotide residues following the -CCA terminus of tRNA. Polyribonucleotide nucleotidyltransferase (PNPase) contains two tandem copies of the domain. PNPase is involved in mRNA degradation in a 3'-5' direction. The exosome is a 3…	sp|Q69LE7|PNP1_ORYSJ Probable polyribonucleotide nucleotidyltransferase 1, chloroplastic OS=Oryza sativa subsp. japonica GN=PNP1 PE=2 SV=1 5.31089e-116	tr|F6HMM7|F6HMM7_VITVI Putative uncharacterized protein OS=Vitis vinifera GN=VIT_08s0056g01420 PE=3 SV=1 5.1e-101	GO:0000175, 3'-5'-exoribonuclease activity;GO:0003723, RNA binding;GO:0004654, polyribonucleotide nucleotidyltransferase activity;GO:0006364, rRNA processing;GO:0006397, mRNA processing;GO:0006402, mRNA catabolic process;GO:0008033, tRNA processing;GO:0009507, chloroplast;GO:0009570, chloroplast stroma;GO:0010323, negative regulation of isopentenyl diphosphate biosynthetic process, methylerythrit…	K00962-ko03018 RNA degradation;ko00230 Purine metabolism;ko00240 Pyrimidine metabolism
TRINITY_DN96952_c1_g3	32.6780176667	332.121252333	-3.34531766976	0.0039800205327899995	0.049729913746600005	down	cd03058, GST_N_Tau, GST_N family, Class Tau subfamily; GSTs are cytosolic dimeric proteins involved in cellular detoxification by catalyzing the conjugation of glutathione (GSH) with a wide range of endogenous and xenobiotic alkylating agents, including carcinogens, therapeutic drugs, environmental toxins and products of oxidative stress. The GST fold contains an N-terminal TRX-fold domain and a …	KOG0406, KOG0406, KOG0406, Glutathione S-transferase [Posttranslational modification, protein turnover, chaperones]. 1.13255e-44	gi|9957262|gb|AAG09294.1| unknown [Petroselinum crispum] 7.4e-58	gi|9957261|gb|AF177944.1|AF177944 Petroselinum crispum unknown mRNA 1.1322e-155	pfam13417, GST_N_3, Glutathione S-transferase, N-terminal domain. 1.33331e-11	sp|Q9FUS8|GSTUH_ARATH Glutathione S-transferase U17 OS=Arabidopsis thaliana GN=GSTU17 PE=2 SV=1 1.09755e-43	tr|Q9FVI9|Q9FVI9_PETCR Putative uncharacterized protein (Fragment) OS=Petroselinum crispum PE=2 SV=1 5.6e-58	GO:0004364, glutathione transferase activity;GO:0005737, cytoplasm;GO:0005829, cytosol;GO:0006749, glutathione metabolic process;GO:0009407, toxin catabolic process;GO:0009507, chloroplast;GO:0009636, response to toxic substance;GO:0009651, response to salt stress;GO:0009704, de-etiolation;GO:0040008, regulation of growth;GO:0048527, lateral root development;GO:0060416, response to growth hormone…	K00799-ko00480 Glutathione metabolism;ko00980 Metabolism of xenobiotics by cytochrome P450;ko00982 Drug metabolism - cytochrome P450
TRINITY_DN76760_c1_g6	1.72609666667	14.81915	-3.1018775324	0.00362378598352	0.0472481465539	down	PRK12552, PRK12552, ATP-dependent Clp protease-like protein; Reviewed. 3.98181e-21	KOG0840, KOG0840, KOG0840, ATP-dependent Clp protease, proteolytic subunit [Posttranslational modification, protein turnover, chaperones]. 1.3074e-15	gi|694390977|ref|XP_009371040.1| PREDICTED: ATP-dependent Clp protease proteolytic subunit-related protein 4, chloroplastic-like [Pyrus x bretschneideri] 4.6e-66	gi|1025372528|ref|XM_016659599.1| PREDICTED: Nicotiana tabacum ATP-dependent Clp protease proteolytic subunit-related protein 4, chloroplastic-like (LOC107831804), transcript variant X2, mRNA 1.02749e-96	pfam00574, CLP_protease, Clp protease. The Clp protease has an active site catalytic triad. In E. coli Clp protease, ser-111, his-136 and asp-185 form the catalytic triad. Cyanophora paradoxa clpP-B has lost all of these active site residues and is therefore inactive. Some family members contain one or two large insertions. 2.82316e-14	sp|Q8LB10|CLPR4_ARATH ATP-dependent Clp protease proteolytic subunit-related protein 4, chloroplastic OS=Arabidopsis thaliana GN=CLPR4 PE=1 SV=1 1.82248e-76	tr|A0A061G2Y9|A0A061G2Y9_THECC ATP-dependent Clp protease proteolytic subunit OS=Theobroma cacao GN=TCM_015861 PE=3 SV=1 6.0e-66	GO:0000302, response to reactive oxygen species;GO:0004252, serine-type endopeptidase activity;GO:0009507, chloroplast;GO:0009532, plastid stroma;GO:0009536, plastid;GO:0009570, chloroplast stroma;GO:0009941, chloroplast envelope;GO:0010468, regulation of gene expression	K01358-ko04212 Longevity regulating pathway - worm;ko04112 Cell cycle - Caulobacter
TRINITY_DN86538_c0_g2	0.414911966667	13.3769953333	-5.010805024730001	4.81925671102e-06	0.000705055085985	down	PLN02635, PLN02635, disproportionating enzyme. 1.63987e-22	-	gi|1021043542|gb|KZN01323.1| hypothetical protein DCAR_010077 [Daucus carota subsp. sativus] 7.6e-31	gi|1026103620|ref|XM_016695390.1| PREDICTED: Capsicum annuum 4-alpha-glucanotransferase, chloroplastic/amyloplastic (LOC107850686), transcript variant X4, mRNA 1.03729e-31	-	sp|Q06801|DPEP_SOLTU 4-alpha-glucanotransferase, chloroplastic/amyloplastic OS=Solanum tuberosum GN=DPEP PE=1 SV=1 2.66743e-29	tr|A0A061DIF7|A0A061DIF7_THECC 4-alpha-glucanotransferase OS=Theobroma cacao GN=TCM_001239 PE=3 SV=1 1.9e-26	GO:0004134, 4-alpha-glucanotransferase activity;GO:0009501, amyloplast;GO:0009507, chloroplast	K00705-ko00500 Starch and sucrose metabolism
TRINITY_DN83977_c2_g2	14.7041754333	0.0201900333333	9.50836687655	4.35088322408e-06	0.000659141659894	up	-	KOG0743, KOG0743, KOG0743, AAA+-type ATPase [Posttranslational modification, protein turnover, chaperones]. 8.21337e-40	gi|1021031111|gb|KZM88896.1| hypothetical protein DCAR_025971 [Daucus carota subsp. sativus] 2.4e-46	-	-	sp|Q147F9|AATPC_ARATH AAA-ATPase At3g50940 OS=Arabidopsis thaliana GN=At3g50940 PE=2 SV=1 6.49981e-39	tr|V4SE74|V4SE74_9ROSI Uncharacterized protein OS=Citrus clementina GN=CICLE_v10025528mg PE=3 SV=1 7.6e-37	GO:0005524, ATP binding;GO:0009651, response to salt stress;GO:0016887, ATPase activity	-
TRINITY_DN94287_c2_g1	0.399194266667	22.3290448333	-5.8056867278199995	0.00290086266658	0.0416385914874	down	PLN02183, PLN02183, ferulate 5-hydroxylase. 1.98269e-70	KOG0156, KOG0156, KOG0156, Cytochrome P450 CYP2 subfamily [Secondary metabolites biosynthesis, transport and catabolism]. 1.7875e-56	gi|1021031675|gb|KZM89459.1| hypothetical protein DCAR_023178 [Daucus carota subsp. sativus] 1.2e-131	gi|373501795|gb|JN604541.1| Panax ginseng cytochrome P450 CYP71D313 mRNA, complete cds 3.16032e-135	pfam00067, p450, Cytochrome P450. Cytochrome P450s are haem-thiolate proteins involved in the oxidative degradation of various compounds. They are particularly well known for their role in the degradation of environmental toxins and mutagens. They can be divided into 4 classes, according to the method by which electrons from NAD(P)H are delivered to the catalytic site. Sequence conservation is re…	sp|H2DH20|C7D13_PANGI Cytochrome P450 CYP71D313 OS=Panax ginseng PE=2 SV=1 0.0	tr|F4YF77|F4YF77_9APIA Cytochrome P450 OS=Panax notoginseng PE=2 SV=1 2.7e-120	GO:0004497, monooxygenase activity;GO:0005506, iron ion binding;GO:0016021, integral component of membrane;GO:0016705, oxidoreductase activity, acting on paired donors, with incorporation or reduction of molecular oxygen;GO:0020037, heme binding	-
TRINITY_DN90972_c5_g2	1378.17706667	141.7953	3.28087963744	1.5384180774700002e-06	0.00031246894661099997	up	-	-	-	-	-	-	-	-	-
TRINITY_DN77345_c0_g1	5.09580333333	0.22654633333299998	4.491431553469999	9.323633399799999e-05	0.00533939977171	up	-	-	-	-	-	-	-	-	-
TRINITY_DN78018_c0_g1	209.249213333	9.49370466667	4.46210721816	1.3395940106e-06	0.00028436603969399997	up	-	-	-	-	-	-	-	-	-
TRINITY_DN95550_c0_g3	1.82360166667	30.8650433333	-4.08111127888	0.00245357110771	0.0375404908263	down	-	-	-	-	-	-	-	-	-
TRINITY_DN83593_c0_g1	0.38571500000000003	13.757803366700001	-5.1565710792	5.06160939391e-05	0.00357766008053	down	TIGR00990, Mitochondrial_import_receptor_subunit_TOM70, mitochondrial precursor proteins import receptor (72 kDa mitochondrial outermembrane protein) (mitochondrial import receptor for the ADP/ATP carrier) (translocase of outermembrane tom70). [Transport and binding proteins, Amino acids, peptides and amines]. 1.18279e-12	KOG0547, KOG0547, KOG0547, Translocase of outer mitochondrial membrane complex, subunit TOM70/TOM72 [Intracellular trafficking, secretion, and vesicular transport]. 3.24439e-18	gi|1021042126|gb|KZM99907.1| hypothetical protein DCAR_012731 [Daucus carota subsp. sativus] 6.2e-124	gi|955362258|ref|XM_003544739.3| PREDICTED: Glycine max TPR repeat-containing thioredoxin TTL1 (LOC100782846), mRNA 1.51038e-12	-	sp|Q9MAH1|TTL1_ARATH TPR repeat-containing thioredoxin TTL1 OS=Arabidopsis thaliana GN=TTL1 PE=1 SV=1 1.73193e-53	tr|A0A061FGI8|A0A061FGI8_THECC Tetratricopeptide repeat-containing protein, putative isoform 1 OS=Theobroma cacao GN=TCM_034929 PE=4 SV=1 7.3e-77	GO:0005623, cell;GO:0005739, mitochondrion;GO:0006970, response to osmotic stress;GO:0009651, response to salt stress;GO:0009737, response to abscisic acid;GO:0009738, abscisic acid-activated signaling pathway;GO:0009789, positive regulation of abscisic acid-activated signaling pathway;GO:0045454, cell redox homeostasis	-
TRINITY_DN81500_c1_g2	156.420366667	29.7427	2.3948208463	0.000241750066725	0.009540315361020001	up	-	-	-	-	-	-	-	-	-
TRINITY_DN96858_c1_g2	7.95712433333	0.0001	16.279959521400002	0.000269490684339	0.0102911854101	up	PLN03059, PLN03059, beta-galactosidase; Provisional. 8.86074e-09	-	gi|1021031119|gb|KZM88904.1| hypothetical protein DCAR_025979 [Daucus carota subsp. sativus] 9.8e-11	-	-	sp|Q9SCV9|BGAL3_ARATH Beta-galactosidase 3 OS=Arabidopsis thaliana GN=BGAL3 PE=2 SV=1 7.43476e-12	tr|D7SP52|D7SP52_VITVI Beta-galactosidase OS=Vitis vinifera GN=VIT_04s0023g02690 PE=3 SV=1 1.4e-09	GO:0004565, beta-galactosidase activity;GO:0005618, cell wall;GO:0005773, vacuole;GO:0005975, carbohydrate metabolic process;GO:0030246, carbohydrate binding;GO:0048046, apoplast	-
TRINITY_DN93571_c1_g1	11.134436666700001	0.165446333333	6.072521439730001	9.11946437047e-05	0.00526553819656	up	-	-	-	-	-	-	-	-	-
TRINITY_DN95128_c2_g1	7.72893	0.558040666667	3.7918265339899997	0.0018828152645100002	0.0322413004426	up	-	-	-	-	-	-	-	-	-
TRINITY_DN76182_c2_g1	0.9519015	21.5409743333	-4.50012740121	0.0018605858552200002	0.0320663505963	down	-	-	gi|1021034434|gb|KZM92218.1| hypothetical protein DCAR_020417 [Daucus carota subsp. sativus] 7.3e-13	-	-	-	tr|M1CPE4|M1CPE4_SOLTU Uncharacterized protein OS=Solanum tuberosum GN=PGSC0003DMG400027952 PE=4 SV=1 4.4e-10	GO:0006952, defense response;GO:0009607, response to biotic stimulus	-
TRINITY_DN98503_c1_g3	66.6605	6.084013333330001	3.45373691881	3.0234140991e-06	0.000507472634717	up	-	-	-	-	-	-	-	-	-
TRINITY_DN98039_c2_g1	162.05830917	29.250824100000003	2.4699638172	0.00193474861423	0.0327226655688	up	pfam01167, Tub, Tub family. 7.59244e-43	KOG2502, KOG2502, KOG2502, Tub family proteins [General function prediction only]. 1.41351e-45	gi|590610361|ref|XP_007021792.1| Tubby like protein 7 isoform 2 [Theobroma cacao] 4.3e-95	gi|1009161975|ref|XR_001582715.1| PREDICTED: Ziziphus jujuba tubby-like F-box protein 7 (LOC107432542), transcript variant X2, misc_RNA 5.94651e-114	pfam01167, Tub, Tub family. 1.8139e-43	sp|Q93VI8|TLP7_ARATH Tubby-like F-box protein 7 OS=Arabidopsis thaliana GN=TULP7 PE=2 SV=1 8.61488e-99	tr|A0A061F9E3|A0A061F9E3_THECC Tubby-like F-box protein OS=Theobroma cacao GN=TCM_031865 PE=3 SV=1 3.3e-95	GO:0003700, DNA binding transcription factor activity;GO:0005634, nucleus;GO:0005829, cytosol;GO:0005886, plasma membrane;GO:0006355, regulation of transcription, DNA-templated;GO:0009536, plastid;GO:0009555, pollen development;GO:0009620, response to fungus;GO:0035091, phosphatidylinositol binding;GO:0044212, transcription regulatory region DNA binding	-
TRINITY_DN87287_c1_g4	40.9106816667	0.368244	6.795671747	1.30275813889e-06	0.000278775178608	up	PTZ00106, PTZ00106, 60S ribosomal protein L30; Provisional. 8.51684e-44	KOG2988, KOG2988, KOG2988, 60S ribosomal protein L30 [Translation, ribosomal structure and biogenesis]. 1.34393e-46	gi|1021051600|gb|KZN09378.1| hypothetical protein DCAR_002034 [Daucus carota subsp. sativus] 2.7e-47	gi|985428232|ref|XM_006464228.2| PREDICTED: Citrus sinensis 60S ribosomal protein L30 (LOC102612801), mRNA 1.71441e-74	pfam01248, Ribosomal_L7Ae, Ribosomal protein L7Ae/L30e/S12e/Gadd45 family. This family includes: Ribosomal L7A from metazoa, Ribosomal L8-A and L8-B from fungi, 30S ribosomal protein HS6 from archaebacteria, 40S ribosomal protein S12 from eukaryotes, Ribosomal protein L30 from eukaryotes and archaebacteria. Gadd45 and MyD118. 9.51148e-12	sp|O49884|RL30_LUPLU 60S ribosomal protein L30 OS=Lupinus luteus GN=RPL30 PE=3 SV=1 2.01767e-57	tr|D7SW25|D7SW25_VITVI Putative uncharacterized protein OS=Vitis vinifera GN=VIT_07s0031g01230 PE=4 SV=1 3.9e-46	GO:0003723, RNA binding;GO:0003735, structural constituent of ribosome;GO:0005840, ribosome;GO:0006412, translation;GO:0022625, cytosolic large ribosomal subunit	K02908-ko03010 Ribosome
TRINITY_DN92399_c0_g2	1.475994	18.5820133333	-3.6541480621499995	0.0037724212623600002	0.0483228491302	down	COG1021, EntE, Peptide arylation enzymes [Secondary metabolites biosynthesis, transport, and catabolism]. 5.14943e-08	-	gi|1021042834|gb|KZN00615.1| hypothetical protein DCAR_009369 [Daucus carota subsp. sativus] 7.3e-25	gi|202070594|gb|AC189357.2| Brassica rapa subsp. pekinensis clone KBrB044D19, complete sequence 1.15114e-13	-	sp|Q9SMT7|4CLLA_ARATH Oxalate--CoA ligase OS=Arabidopsis thaliana GN=AAE3 PE=1 SV=1 4.70473e-23	tr|A0A103YDM9|A0A103YDM9_CYNCS Uncharacterized protein OS=Cynara cardunculus var. scolymus GN=Ccrd_014484 PE=4 SV=1 1.1e-20	GO:0003824, catalytic activity;GO:0005524, ATP binding;GO:0005737, cytoplasm;GO:0008152, metabolic process;GO:0009506, plasmodesma;GO:0009507, chloroplast;GO:0009570, chloroplast stroma;GO:0009735, response to cytokinin;GO:0010030, positive regulation of seed germination;GO:0010214, seed coat development;GO:0033611, oxalate catabolic process;GO:0046686, response to cadmium ion;GO:0048046, apoplas…	-
TRINITY_DN88686_c1_g7	0.8281703333329999	74.71488000000001	-6.4953242608899995	0.000225153462592	0.0091123323798	down	PLN00220, PLN00220, tubulin beta chain; Provisional. 6.41477e-61	KOG1375, KOG1375, KOG1375, Beta tubulin [Cytoskeleton]. 1.59661e-54	gi|747041332|ref|XP_011072483.1| PREDICTED: tubulin beta-8 chain-like [Sesamum indicum] 4.5e-47	gi|511783111|gb|KC731434.1| Physaria fendleri putative tubulin beta-2-like protein mRNA, complete cds 6.80731e-95	pfam03953, Tubulin_C, Tubulin C-terminal domain. This family includes the tubulin alpha, beta and gamma chains. Members of this family are involved in polymer formation. Tubulins are GTPases. FtsZ can polymerize into tubes, sheets, and rings in vitro and is ubiquitous in eubacteria and archaea. Tubulin is the major component of microtubules. (The FtsZ GTPases have been split into their won family…	sp|Q40106|TBB2_LUPAL Tubulin beta-2 chain OS=Lupinus albus GN=TUBB2 PE=3 SV=1 4.12178e-61	tr|B9SPG2|B9SPG2_RICCO Tubulin beta chain, putative OS=Ricinus communis GN=RCOM_0085870 PE=3 SV=1 3.5e-47	GO:0003924, GTPase activity;GO:0005200, structural constituent of cytoskeleton;GO:0005525, GTP binding;GO:0005737, cytoplasm;GO:0005874, microtubule;GO:0007017, microtubule-based process	-
TRINITY_DN91074_c1_g5	40.7054666667	8.085939999999999	2.33173515515	0.00200769012209	0.0334216465487	up	-	-	-	-	-	-	-	-	-
TRINITY_DN92973_c1_g3	59.0706	13.7795333333	2.09991323636	0.0037708723017499998	0.048316965499	up	-	KOG0019, KOG0019, KOG0019, Molecular chaperone (HSP90 family) [Posttranslational modification, protein turnover, chaperones]. 1.14995e-06	gi|1021033749|gb|KZM91533.1| hypothetical protein DCAR_021102 [Daucus carota subsp. sativus] 1.4e-14	-	-	sp|Q9SIF2|HS905_ARATH Heat shock protein 90-5, chloroplastic OS=Arabidopsis thaliana GN=HSP90-5 PE=1 SV=1 4.14514e-16	tr|A0A0L9UUC2|A0A0L9UUC2_PHAAN Uncharacterized protein OS=Phaseolus angularis GN=LR48_Vigan07g003000 PE=3 SV=1 6.5e-12	GO:0005524, ATP binding;GO:0005739, mitochondrion;GO:0005774, vacuolar membrane;GO:0006457, protein folding;GO:0006950, response to stress;GO:0009408, response to heat;GO:0009414, response to water deprivation;GO:0009507, chloroplast;GO:0009536, plastid;GO:0009570, chloroplast stroma;GO:0009651, response to salt stress;GO:0009704, de-etiolation;GO:0009941, chloroplast envelope;GO:0010157, respons…	-
TRINITY_DN74812_c0_g1	0.0834693333333	8.229255323330001	-6.62337182667	0.00114875508487	0.0239319063657	down	PLN02683, PLN02683, pyruvate dehydrogenase E1 component subunit beta. 2.20306e-07	KOG0606, KOG0606, KOG0606, Microtubule-associated serine/threonine kinase and related proteins [Signal transduction mechanisms, General function prediction only]. 1.94721e-06	gi|1021042112|gb|KZM99893.1| hypothetical protein DCAR_012745 [Daucus carota subsp. sativus] 5.7e-08	-	-	sp|Q6Z1G7|ODPB1_ORYSJ Pyruvate dehydrogenase E1 component subunit beta-1, mitochondrial OS=Oryza sativa subsp. japonica GN=Os08g0536000 PE=2 SV=1 2.66687e-07	tr|A0A067KQR7|A0A067KQR7_JATCU Uncharacterized protein OS=Jatropha curcas GN=JCGZ_04407 PE=4 SV=1 5.7e-08	GO:0004674, protein serine/threonine kinase activity;GO:0004739, pyruvate dehydrogenase (acetyl-transferring) activity;GO:0005524, ATP binding;GO:0005759, mitochondrial matrix;GO:0006086, acetyl-CoA biosynthetic process from pyruvate;GO:0006096, glycolytic process	-
TRINITY_DN94585_c0_g1	0.144654666667	6.715548333330001	-5.53682043086	0.00036348798352599997	0.012189514169299998	down	-	-	gi|1021054063|gb|KZN11841.1| hypothetical protein DCAR_004497 [Daucus carota subsp. sativus] 6.2e-08	-	-	-	-	-	-
TRINITY_DN74121_c0_g1	0.127184466667	6.507522966669999	-5.67711411146	9.5944198348e-06	0.0011372714036700002	down	PLN02640, PLN02640, glucose-6-phosphate 1-dehydrogenase. 0.0	KOG0563, KOG0563, KOG0563, Glucose-6-phosphate 1-dehydrogenase [Carbohydrate transport and metabolism]. 1.49681e-133	gi|747104657|ref|XP_011100573.1| PREDICTED: glucose-6-phosphate 1-dehydrogenase, chloroplastic [Sesamum indicum] 2.4e-172	gi|590712289|ref|XM_007049286.1| Theobroma cacao Glucose-6-phosphate dehydrogenase 1 isoform 1 (TCM_002394) mRNA, complete cds 0.0	pfam02781, G6PD_C, Glucose-6-phosphate dehydrogenase, C-terminal domain. 3.92152e-98	sp|O24357|G6PDC_SPIOL Glucose-6-phosphate 1-dehydrogenase, chloroplastic OS=Spinacia oleracea GN=G6PD PE=2 SV=1 0.0	tr|A0A067K4E8|A0A067K4E8_JATCU Glucose-6-phosphate 1-dehydrogenase OS=Jatropha curcas GN=JCGZ_18492 PE=3 SV=1 4.6e-171	GO:0004345, glucose-6-phosphate dehydrogenase activity;GO:0006006, glucose metabolic process;GO:0006098, pentose-phosphate shunt;GO:0009507, chloroplast;GO:0050661, NADP binding	K00036-ko01200 Carbon metabolism;ko00480 Glutathione metabolism;ko00030 Pentose phosphate pathway
TRINITY_DN94930_c1_g2	100.509989	35.3133901	1.5090516559399998	0.00325749107012	0.0444531192105	up	PLN00410, PLN00410, U5 snRNP protein, DIM1 family; Provisional. 1.22408e-09	KOG3414, KOG3414, KOG3414, Component of the U4/U6.U5 snRNP/mitosis protein DIM1 [RNA processing and modification, Cell cycle control, cell division, chromosome partitioning]. 1.01277e-07	-	gi|695050282|ref|XM_009414843.1| PREDICTED: Musa acuminata subsp. malaccensis thioredoxin-like protein YLS8 (LOC103994492), mRNA 1.03316e-14	-	sp|Q9FE62|YLS8_ARATH Thioredoxin-like protein YLS8 OS=Arabidopsis thaliana GN=YLS8 PE=2 SV=1 4.54528e-09	-	GO:0000245, spliceosomal complex assembly;GO:0005634, nucleus;GO:0005681, spliceosomal complex;GO:0005682, U5 snRNP;GO:0005737, cytoplasm;GO:0046540, U4/U6 x U5 tri-snRNP complex	-
TRINITY_DN65800_c0_g1	215.962333333	22.895	3.23767523925	1.78281742472e-06	0.00034060726899299995	up	-	-	gi|1021038196|gb|KZM95979.1| hypothetical protein DCAR_019221 [Daucus carota subsp. sativus] 2.0e-24	-	pfam03141, Methyltransf_29, Putative S-adenosyl-L-methionine-dependent methyltransferase. This family is a putative S-adenosyl-L-methionine (SAM)-dependent methyltransferase. 7.8988e-06	sp|Q9C9Q8|PMTT_ARATH Probable pectin methyltransferase QUA2 OS=Arabidopsis thaliana GN=QUA2 PE=1 SV=2 1.4772e-19	tr|W9RIC0|W9RIC0_9ROSA Putative pectin methyltransferase QUA2 OS=Morus notabilis GN=L484_012723 PE=4 SV=1 2.7e-21	GO:0000139, Golgi membrane;GO:0005768, endosome;GO:0005774, vacuolar membrane;GO:0005794, Golgi apparatus;GO:0005802, trans-Golgi network;GO:0007155, cell adhesion;GO:0008168, methyltransferase activity;GO:0008757, S-adenosylmethionine-dependent methyltransferase activity;GO:0009735, response to cytokinin;GO:0010289, homogalacturonan biosynthetic process;GO:0016021, integral component of membrane…	-
TRINITY_DN69103_c1_g3	21.147508666700002	0.650758333333	5.02222202167	0.00016209538216	0.0074554183828799995	up	-	-	-	-	-	-	-	-	-
TRINITY_DN93849_c1_g1	3.0410341639999996	21.894717306599997	-2.84794889328	0.0029062034049099996	0.0416666066935	down	COG5333, CCL1, Cdk activating kinase (CAK)/RNA polymerase II transcription initiation/nucleotide excision repair factor TFIIH/TFIIK, cyclin H subunit [Cell division and chromosome partitioning / Transcription / DNA replication, recombination, and repair]. 1.50258e-08	KOG0834, KOG0834, KOG0834, CDK9 kinase-activating protein cyclin T [Cell cycle control, cell division, chromosome partitioning]. 6.89746e-27	gi|1021025264|gb|KZM83052.1| hypothetical protein DCAR_030621 [Daucus carota subsp. sativus] 3.1e-146	gi|567853444|ref|XM_006419823.1| Citrus clementina hypothetical protein (CICLE_v10005160mg) mRNA, complete cds 1.70054e-78	-	sp|Q2RAC5|CCT13_ORYSJ Cyclin-T1-3 OS=Oryza sativa subsp. japonica GN=CYCT1-3 PE=3 SV=2 7.16559e-42	tr|A0A103Y2Z0|A0A103Y2Z0_CYNCS Cyclin C/H/T/L OS=Cynara cardunculus var. scolymus GN=Ccrd_020147 PE=3 SV=1 1.2e-92	GO:0000307, cyclin-dependent protein kinase holoenzyme complex;GO:0005634, nucleus;GO:0007049, cell cycle;GO:0016538, cyclin-dependent protein serine/threonine kinase regulator activity;GO:0045737, positive regulation of cyclin-dependent protein serine/threonine kinase activity;GO:0045944, positive regulation of transcription by RNA polymerase II;GO:0051301, cell division;GO:1901409, positive reg…	-
TRINITY_DN90117_c2_g5	1.690607	12.287434333299998	-2.8615704728500004	0.0036592328583200003	0.047453142099800005	down	PTZ00327, PTZ00327, eukaryotic translation initiation factor 2 gamma subunit; Provisional. 1.03605e-88	KOG0466, KOG0466, KOG0466, Translation initiation factor 2, gamma subunit (eIF-2gamma; GTPase) [Translation, ribosomal structure and biogenesis]. 2.56525e-105	gi|1021028370|gb|KZM86155.1| hypothetical protein DCAR_023289 [Daucus carota subsp. sativus] 6.1e-94	gi|731413334|ref|XM_010660390.1| PREDICTED: Vitis vinifera eukaryotic translation initiation factor 2 subunit gamma (LOC100257493), transcript variant X4, mRNA 1.11027e-151	-	sp|Q5ZMS3|IF2G_CHICK Eukaryotic translation initiation factor 2 subunit 3 OS=Gallus gallus GN=EIF2S3 PE=1 SV=1 6.39343e-90	tr|A0A0E0MK96|A0A0E0MK96_ORYPU Uncharacterized protein OS=Oryza punctata PE=4 SV=1 9.7e-92	GO:0001731, formation of translation preinitiation complex;GO:0003743, translation initiation factor activity;GO:0003924, GTPase activity;GO:0005525, GTP binding;GO:0005622, intracellular	K03242-ko03013 RNA transport
TRINITY_DN68827_c2_g1	8.230606666669999	0.549903333333	3.90374883675	0.0033755316013800002	0.045419948812999995	up	-	-	-	-	-	-	-	-	-
TRINITY_DN81698_c0_g1	0.303377133333	7.421040400000001	-4.61243720758	0.000237777383448	0.00945245134434	down	cd03213, ABCG_EPDR, Eye pigment and drug resistance transporter subfamily G of the ATP-binding cassette superfamily. ABCG transporters are involved in eye pigment (EP) precursor transport, regulation of lipid-trafficking mechanisms, and pleiotropic drug resistance (DR). DR is a well-described phenomenon occurring in fungi and shares several similarities with processes in bacteria and higher eukar…	KOG0061, KOG0061, KOG0061, Transporter, ABC superfamily (Breast cancer resistance protein) [Secondary metabolites biosynthesis, transport and catabolism]. 9.11984e-32	gi|1021048665|gb|KZN06445.1| hypothetical protein DCAR_007282 [Daucus carota subsp. sativus] 1.7e-75	gi|731369756|ref|XM_002284058.2| PREDICTED: Vitis vinifera ABC transporter G family member 7 (LOC100264613), transcript variant X2, mRNA 1.35411e-74	pfam00005, ABC_tran, ABC transporter. ABC transporters for a large family of proteins responsible for translocation of a variety of compounds across biological membranes. ABC transporters are the largest family of proteins in many completely sequenced bacteria. ABC transporters are composed of two copies of this domain and two copies of a transmembrane domain pfam00664. These four domains may bel…	sp|Q9ZU35|AB7G_ARATH ABC transporter G family member 7 OS=Arabidopsis thaliana GN=ABCG7 PE=2 SV=1 2.32013e-67	tr|D7T8V5|D7T8V5_VITVI Putative uncharacterized protein OS=Vitis vinifera GN=VIT_01s0011g04670 PE=4 SV=1 3.3e-63	GO:0005524, ATP binding;GO:0005886, plasma membrane;GO:0009507, chloroplast;GO:0009941, chloroplast envelope;GO:0016021, integral component of membrane;GO:0042626, ATPase activity, coupled to transmembrane movement of substances	-
TRINITY_DN80909_c3_g2	6.678294	44.2983056667	-2.72970000726	0.0027151408489499997	0.0398120551073	down	PLN02300, PLN02300, lactoylglutathione lyase. 1.95296e-56	KOG2943, KOG2943, KOG2943, Predicted glyoxalase [Carbohydrate transport and metabolism]. 2.65758e-29	gi|595804142|ref|XP_007202109.1| hypothetical protein PRUPE_ppa007643mg [Prunus persica] 2.4e-65	gi|719979871|ref|XM_010251320.1| PREDICTED: Nelumbo nucifera probable lactoylglutathione lyase, chloroplast (LOC104592116), mRNA 1.92047e-59	pfam00903, Glyoxalase, Glyoxalase/Bleomycin resistance protein/Dioxygenase superfamily. 1.01016e-06	sp|Q8W593|LGUC_ARATH Probable lactoylglutathione lyase, chloroplastic OS=Arabidopsis thaliana GN=At1g67280 PE=1 SV=1 1.08447e-77	tr|M5W244|M5W244_PRUPE Lactoylglutathione lyase OS=Prunus persica GN=PRUPE_ppa007643mg PE=3 SV=1 1.9e-65	GO:0004462, lactoylglutathione lyase activity;GO:0009409, response to cold;GO:0009507, chloroplast;GO:0009570, chloroplast stroma;GO:0009579, thylakoid;GO:0010319, stromule;GO:0031977, thylakoid lumen;GO:0046872, metal ion binding	K01759-ko00620 Pyruvate metabolism
TRINITY_DN83034_c0_g1	0.0001	6.023541076130001	-15.878324237100001	1.11183130878e-05	0.0012670390583199998	down	TIGR00957, Multidrug_resistance-associated_protein_1, multi drug resistance-associated protein (MRP). This model describes multi drug resistance-associated protein (MRP) in eukaryotes. The multidrug resistance-associated protein is an integral membrane protein that causes multidrug resistance when overexpressed in mammalian cells. It belongs to ABC transporter superfamily. The protein topology an…	KOG0054, KOG0054, KOG0054, Multidrug resistance-associated protein/mitoxantrone resistance protein, ABC superfamily [Secondary metabolites biosynthesis, transport and catabolism]. 2.93149e-106	gi|902205072|gb|KNA15079.1| hypothetical protein SOVF_101510 isoform A [Spinacia oleracea] 4.3e-246	gi|731335308|ref|XM_010680359.1| PREDICTED: Beta vulgaris subsp. vulgaris ABC transporter C family member 3-like (LOC104894183), mRNA 0.0	pfam00005, ABC_tran, ABC transporter. ABC transporters for a large family of proteins responsible for translocation of a variety of compounds across biological membranes. ABC transporters are the largest family of proteins in many completely sequenced bacteria. ABC transporters are composed of two copies of this domain and two copies of a transmembrane domain pfam00664. These four domains may bel…	sp|Q9LK64|AB3C_ARATH ABC transporter C family member 3 OS=Arabidopsis thaliana GN=ABCC3 PE=1 SV=1 0.0	tr|A0A0K9R7W6|A0A0K9R7W6_SPIOL Uncharacterized protein OS=Spinacia oleracea GN=SOVF_101510 PE=4 SV=1 3.3e-246	GO:0000325, plant-type vacuole;GO:0005524, ATP binding;GO:0005773, vacuole;GO:0005774, vacuolar membrane;GO:0008559, xenobiotic transmembrane transporting ATPase activity;GO:0009506, plasmodesma;GO:0010290, chlorophyll catabolite transmembrane transporter activity;GO:0015431, glutathione S-conjugate-exporting ATPase activity;GO:0016021, integral component of membrane;GO:0042626, ATPase activity, …	-
TRINITY_DN95351_c1_g8	79.0883666667	9.533166666669999	3.05243807606	4.79859493103e-05	0.0034878579264400003	up	-	-	-	-	-	-	-	-	-
TRINITY_DN95396_c0_g1	14.908269899999999	2.75130366667	2.43792555646	0.0017335990461700003	0.030725618892900004	up	-	-	-	-	-	-	-	-	-
TRINITY_DN95281_c0_g5	19.2634256667	2.75916466667	2.80356082006	0.00189550661775	0.032350610449099995	up	-	-	gi|1021041205|gb|KZM98986.1| hypothetical protein DCAR_013652 [Daucus carota subsp. sativus] 1.2e-06	gi|975108704|ref|XM_015414375.1| PREDICTED: Gekko japonicus tubulin beta 6 class V (TUBB6), mRNA 9.39768e-12	-	-	tr|Q2PHK9|Q2PHK9_DAUCA Cyclin B1-2 OS=Daucus carota GN=DcCycB1-2 PE=2 SV=1 8.9e-07	GO:0005634, nucleus	-
TRINITY_DN89736_c0_g1	40.6816	1.806544	4.4930721228	2.88006277127e-05	0.00248842668331	up	-	-	-	-	-	-	-	-	-
TRINITY_DN76705_c0_g1	20.2663323333	0.668723333333	4.92153175558	0.0026163043228	0.03891625369730001	up	-	-	-	-	-	-	-	-	-
TRINITY_DN76705_c0_g2	25.4426756667	0.622829	5.35227046833	0.000161066241899	0.00742539380767	up	-	-	-	-	-	-	-	-	-
TRINITY_DN86607_c1_g2	35.268459666700004	6.735983066669999	2.38841815133	0.00019546863422299998	0.00834783436766	up	-	-	-	-	-	-	-	-	-
TRINITY_DN65708_c0_g1	7.328636266669999	0.04557766666669999	7.329073884139999	6.56232386311e-09	4.4730478919e-06	up	-	-	-	-	-	-	-	-	-
TRINITY_DN96382_c2_g1	10.326184036	0.6612499	3.96496780626	7.97762692248e-05	0.004820490344220001	up	TIGR01770, NADH-quinone_oxidoreductase_subunit_N, proton-translocating NADH-quinone oxidoreductase, chain N. This model describes the 14th (based on E. coli) structural gene, N, of bacterial and chloroplast energy-transducing NADH (or NADPH) dehydrogenases. This model does not describe any subunit of the mitochondrial complex I (for which the subunit composition is very different), nor NADH dehyd…	KOG4668, KOG4668, KOG4668, NADH dehydrogenase subunits 2, 5, and related proteins [Energy production and conversion]. 1.44384e-24	gi|316996002|dbj|BAD83439.2| NADH dehydrogenase subunit 2 (mitochondrion) [Nicotiana tabacum] 3.9e-153	gi|1029019371|ref|XM_016818057.1| PREDICTED: Gossypium hirsutum NADH-ubiquinone oxidoreductase chain 2 (LOC107893137), mRNA 0.0	pfam00361, Proton_antipo_M, Proton-conducting membrane transporter. This is a family of membrane transporters that inlcudes some 7 of potentially 14-16 TM regions. In many instances the family forms part of complex I that catalyzes the transfer of two electrons from NADH to ubiquinone in a reaction that is associated with proton translocation across the membrane, and in this context is a combinat…	sp|P93401|NU2M_OENBE NADH-ubiquinone oxidoreductase chain 2 OS=Oenothera berteroana GN=ND2 PE=2 SV=2 0.0	tr|Q5MA39|Q5MA39_TOBAC NADH dehydrogenase subunit 2 OS=Nicotiana tabacum GN=nad2 PE=3 SV=2 3.0e-153	GO:0005739, mitochondrion;GO:0005743, mitochondrial inner membrane;GO:0008137, NADH dehydrogenase (ubiquinone) activity;GO:0016021, integral component of membrane;GO:0042773, ATP synthesis coupled electron transport;GO:0070469, respiratory chain	K03879-ko00190 Oxidative phosphorylation
TRINITY_DN69738_c0_g2	16.9664666667	116.977383	-2.78547156444	0.00106223333732	0.0229615610291	down	PLN00135, PLN00135, malate dehydrogenase. 5.71156e-30	KOG1496, KOG1496, KOG1496, Malate dehydrogenase [Energy production and conversion]. 8.47826e-25	gi|1021027473|gb|KZM85260.1| hypothetical protein DCAR_027318 [Daucus carota subsp. sativus] 2.3e-31	gi|951026916|ref|XM_014658540.1| PREDICTED: Vigna radiata var. radiata malate dehydrogenase, cytoplasmic (LOC106772259), mRNA 1.52044e-67	-	sp|Q08062|MDHC_MAIZE Malate dehydrogenase, cytoplasmic OS=Zea mays PE=2 SV=2 1.08458e-36	tr|A0A0D2UUE3|A0A0D2UUE3_GOSRA Malate dehydrogenase OS=Gossypium raimondii GN=B456_011G174200 PE=3 SV=1 5.6e-30	GO:0005737, cytoplasm;GO:0005975, carbohydrate metabolic process;GO:0006099, tricarboxylic acid cycle;GO:0006108, malate metabolic process;GO:0030060, L-malate dehydrogenase activity	-
TRINITY_DN98613_c1_g2	0.805710366667	8.027754	-3.3166631846900003	0.00362978352997	0.047254607987400006	down	pfam08626, TRAPPC9-Trs120, Transport protein Trs120 or TRAPPC9, TRAPP II complex subunit. This region is found at the N terminal of Saccharomyces cerevisiae Trs120 protein. Trs120 is a subunit of the multiprotein complex TRAPP (transport particle protein) which functions in ER to Golgi traffic. Trs120 is specific to the larger TRAPP complex, TRAPP II, along with Trs65p and Trs130p(TRAPPC10). It i…	KOG1953, KOG1953, KOG1953, Targeting complex (TRAPP) subunit [Intracellular trafficking, secretion, and vesicular transport]. 2.63961e-17	gi|1021032940|gb|KZM90724.1| hypothetical protein DCAR_021911 [Daucus carota subsp. sativus] 1.5e-107	gi|828308894|ref|XM_004498712.2| PREDICTED: Cicer arietinum trafficking protein particle complex II-specific subunit 120 homolog (LOC101495233), mRNA 2.06957e-46	pfam08626, TRAPPC9-Trs120, Transport protein Trs120 or TRAPPC9, TRAPP II complex subunit. This region is found at the N terminal of Saccharomyces cerevisiae Trs120 protein. Trs120 is a subunit of the multiprotein complex TRAPP (transport particle protein) which functions in ER to Golgi traffic. Trs120 is specific to the larger TRAPP complex, TRAPP II, along with Trs65p and Trs130p(TRAPPC10). It i…	sp|Q9FY61|TR120_ARATH Trafficking protein particle complex II-specific subunit 120 homolog OS=Arabidopsis thaliana GN=TRS120 PE=1 SV=1 1.45592e-99	tr|K4C7L2|K4C7L2_SOLLC Uncharacterized protein OS=Solanum lycopersicum PE=4 SV=1 3.2e-89	GO:0000911, cytokinesis by cell plate formation;GO:0000919, cell plate assembly;GO:0005769, early endosome;GO:0005802, trans-Golgi network;GO:0006810, transport	-
TRINITY_DN76710_c0_g4	29.1900666667	8.22852	1.82677263305	0.0034357041548699996	0.045892049102999995	up	-	-	-	-	-	-	-	-	-
TRINITY_DN75352_c1_g1	13.111657233299999	1.30274733333	3.33122083817	0.000199911519632	0.00848181096065	up	pfam00854, PTR2, POT family. The POT (proton-dependent oligopeptide transport) family all appear to be proton dependent transporters. 1.53337e-28	KOG1237, KOG1237, KOG1237, H+/oligopeptide symporter [Amino acid transport and metabolism]. 6.23971e-64	gi|1021045600|gb|KZN03381.1| hypothetical protein DCAR_012137 [Daucus carota subsp. sativus] 2.8e-140	gi|1009157933|ref|XM_016041529.1| PREDICTED: Ziziphus jujuba protein NRT1/ PTR FAMILY 5.6 (LOC107430660), transcript variant X3, mRNA 1.91079e-53	pfam00854, PTR2, POT family. The POT (proton-dependent oligopeptide transport) family all appear to be proton dependent transporters. 3.66336e-29	sp|Q9M331|PTR45_ARATH Protein NRT1/ PTR FAMILY 5.7 OS=Arabidopsis thaliana GN=NPF5.7 PE=2 SV=2 2.66433e-104	tr|M1ARQ3|M1ARQ3_SOLTU Uncharacterized protein OS=Solanum tuberosum GN=PGSC0003DMG400011085 PE=3 SV=1 1.3e-113	GO:0005215, transporter activity;GO:0005886, plasma membrane;GO:0006857, oligopeptide transport;GO:0016021, integral component of membrane	-
TRINITY_DN93309_c1_g2	0.5461251	12.7359218667	-4.5435281152	0.000124046008292	0.0062863688216899995	down	TIGR00955, Protein_white, The Eye Pigment Precursor Transporter (EPP) Family protein. [Transport and binding proteins, Other]. 1.15769e-36	KOG0061, KOG0061, KOG0061, Transporter, ABC superfamily (Breast cancer resistance protein) [Secondary metabolites biosynthesis, transport and catabolism]. 2.61202e-25	gi|1021048665|gb|KZN06445.1| hypothetical protein DCAR_007282 [Daucus carota subsp. sativus] 1.0e-159	gi|731369756|ref|XM_002284058.2| PREDICTED: Vitis vinifera ABC transporter G family member 7 (LOC100264613), transcript variant X2, mRNA 0.0	pfam01061, ABC2_membrane, ABC-2 type transporter. 4.93969e-18	sp|Q9ZU35|AB7G_ARATH ABC transporter G family member 7 OS=Arabidopsis thaliana GN=ABCG7 PE=2 SV=1 0.0	tr|A0A097P9S5|A0A097P9S5_HEVBR ABC transporter family protein OS=Hevea brasiliensis GN=ABCG7 PE=2 SV=1 3.0e-143	GO:0005524, ATP binding;GO:0005886, plasma membrane;GO:0009507, chloroplast;GO:0009941, chloroplast envelope;GO:0016021, integral component of membrane;GO:0016887, ATPase activity;GO:0042626, ATPase activity, coupled to transmembrane movement of substances	-
TRINITY_DN50408_c0_g1	10.2239133333	0.0159052	9.32823328342	4.68208675208e-07	0.000127787524855	up	-	-	-	-	-	-	-	-	-
TRINITY_DN74063_c3_g4	5.998311933330001	0.2521662	4.57210973244	0.00059777269751	0.0163699498786	up	COG1741, COG1741, Pirin-related protein [General function prediction only]. 2.19122e-41	-	gi|971518331|dbj|GAQ79883.1| cupin-domain containing protein [Klebsormidium flaccidum] 2.8e-80	gi|330925071|ref|XM_003300857.1| Pyrenophora teres f. teres 0-1 hypothetical protein, mRNA 0.0	pfam02678, Pirin, Pirin. This family consists of Pirin proteins from both eukaryotes and prokaryotes. The function of Pirin is unknown but the gene coding for this protein is known to be expressed in all tissues in the human body although it is expressed most strongly in the liver and heart. Pirin is known to be a nuclear protein, exclusively localized within the nucleoplasma and predominantly co…	sp|O00625|PIR_HUMAN Pirin OS=Homo sapiens GN=PIR PE=1 SV=1 1.87788e-88	tr|K3ZU97|K3ZU97_SETIT Uncharacterized protein OS=Setaria italica GN=Si030178m.g PE=3 SV=1 2.6e-78	GO:0003712, transcription cofactor activity;GO:0005634, nucleus;GO:0005737, cytoplasm;GO:0006355, regulation of transcription, DNA-templated;GO:0006366, transcription by RNA polymerase II;GO:0008127, quercetin 2,3-dioxygenase activity;GO:0016021, integral component of membrane;GO:0030224, monocyte differentiation;GO:0046872, metal ion binding	-
TRINITY_DN79499_c1_g1	4091.25935747	905.0891667330001	2.17641316258	0.00173996504621	0.030779659451599998	up	-	-	-	-	-	-	-	-	-
TRINITY_DN96497_c0_g3	1.78014	19.2991553333	-3.43847509416	5.86848086556e-05	0.00392988568643	down	COG5110, RPN1, 26S proteasome regulatory complex component [Posttranslational modification, protein turnover, chaperones]. 6.62525e-40	KOG2005, KOG2005, KOG2005, 26S proteasome regulatory complex, subunit RPN1/PSMD2 [Posttranslational modification, protein turnover, chaperones]. 7.88452e-104	gi|1021043219|gb|KZN01000.1| hypothetical protein DCAR_009754 [Daucus carota subsp. sativus] 4.6e-133	gi|1000968916|ref|XM_002517812.2| PREDICTED: Ricinus communis 26S proteasome non-ATPase regulatory subunit 2 homolog A (LOC8269128), mRNA 0.0	-	sp|Q9SIV2|PSD2A_ARATH 26S proteasome non-ATPase regulatory subunit 2 homolog A OS=Arabidopsis thaliana GN=RPN1A PE=1 SV=2 1.5633e-155	tr|E0CTI4|E0CTI4_VITVI Putative uncharacterized protein OS=Vitis vinifera GN=VIT_12s0028g03130 PE=4 SV=1 1.8e-129	GO:0000502, proteasome complex;GO:0005634, nucleus;GO:0005737, cytoplasm;GO:0005829, cytosol;GO:0005886, plasma membrane;GO:0008540, proteasome regulatory particle, base subcomplex;GO:0009506, plasmodesma;GO:0009751, response to salicylic acid;GO:0030163, protein catabolic process;GO:0030234, enzyme regulator activity;GO:0034515, proteasome storage granule;GO:0042176, regulation of protein catabo…	K03028-ko03050 Proteasome
TRINITY_DN69440_c1_g3	4.30870003333	40.0848894667	-3.2177339277200003	0.00391619393106	0.0493183809965	down	cd00913, PCD_DCoH_subfamily_a, PCD_DCoH: The bifunctional protein pterin-4alpha-carbinolamine dehydratase (PCD), also known as DCoH (dimerization cofactor of hepatocyte nuclear factor-1), is both a transcription activator and a metabolic enzyme. DCoH stimulates gene expression by associating with specific DNA binding proteins such as HNF-1alpha (hepatocyte nuclear factor-1) and Xenopus enhancer o…	-	gi|1021037042|gb|KZM94825.1| hypothetical protein DCAR_018067 [Daucus carota subsp. sativus] 3.3e-102	-	pfam01329, Pterin_4a, Pterin 4 alpha carbinolamine dehydratase. Pterin 4 alpha carbinolamine dehydratase is also known as DCoH (dimerization cofactor of hepatocyte nuclear factor 1-alpha). 6.92343e-10	sp|A1TZA3|PHS_MARHV Putative pterin-4-alpha-carbinolamine dehydratase OS=Marinobacter hydrocarbonoclasticus (strain ATCC 700491 / DSM 11845 / VT8) GN=Maqu_0976 PE=3 SV=1 3.06019e-12	tr|F6I2K2|F6I2K2_VITVI Putative uncharacterized protein OS=Vitis vinifera GN=VIT_16s0013g00240 PE=4 SV=1 3.2e-65	GO:0006729, tetrahydrobiopterin biosynthetic process;GO:0008124, 4-alpha-hydroxytetrahydrobiopterin dehydratase activity;GO:0009507, chloroplast	-
TRINITY_DN86610_c3_g2	11.487520333299999	0.8094826666670001	3.8269234162699997	0.0018869826193800001	0.0322559815808	up	-	-	-	-	-	-	-	-	-
TRINITY_DN96903_c1_g1	6.18115566667	0.6266104666669999	3.30223582518	0.00395711368874	0.049618864086600004	up	-	-	-	-	-	-	-	-	-
TRINITY_DN95553_c0_g1	12.8739743333	2.4240319	2.40897690792	0.00201145718017	0.0334283499363	up	PLN00110, PLN00110, flavonoid 3',5'-hydroxylase (F3'5'H); Provisional. 4.78901e-20	KOG0156, KOG0156, KOG0156, Cytochrome P450 CYP2 subfamily [Secondary metabolites biosynthesis, transport and catabolism]. 5.64296e-12	gi|567907409|ref|XP_006446018.1| hypothetical protein CICLE_v10014862mg [Citrus clementina] 3.4e-33	-	pfam00067, p450, Cytochrome P450. Cytochrome P450s are haem-thiolate proteins involved in the oxidative degradation of various compounds. They are particularly well known for their role in the degradation of environmental toxins and mutagens. They can be divided into 4 classes, according to the method by which electrons from NAD(P)H are delivered to the catalytic site. Sequence conservation is re…	sp|Q9SBQ9|F3PH_PETHY Flavonoid 3'-monooxygenase OS=Petunia hybrida GN=CYP75B2 PE=2 SV=1 2.19909e-18	tr|V4TFX9|V4TFX9_9ROSI Uncharacterized protein OS=Citrus clementina GN=CICLE_v10014862mg PE=3 SV=1 2.6e-33	GO:0004497, monooxygenase activity;GO:0005506, iron ion binding;GO:0005789, endoplasmic reticulum membrane;GO:0009813, flavonoid biosynthetic process;GO:0016021, integral component of membrane;GO:0016705, oxidoreductase activity, acting on paired donors, with incorporation or reduction of molecular oxygen;GO:0016711, flavonoid 3'-monooxygenase activity;GO:0020037, heme binding	-
TRINITY_DN80990_c2_g1	0.366469566667	11.2039513333	-4.93417041643	0.00197837143751	0.0331636318623	down	-	-	-	gi|1021510298|ref|XM_016342964.1| PREDICTED: Arachis ipaensis uncharacterized LOC107639459 (LOC107639459), transcript variant X2, mRNA 7.22706e-14	-	-	-	-	-
TRINITY_DN73205_c0_g1	35.50005	6.5300006666699995	2.44266601241	0.0032547758444899997	0.044425399144900006	up	-	-	gi|1021038168|gb|KZM95951.1| hypothetical protein DCAR_019193 [Daucus carota subsp. sativus] 3.3e-15	-	-	sp|Q9M5P2|SCAM3_ARATH Secretory carrier-associated membrane protein 3 OS=Arabidopsis thaliana GN=SCAMP3 PE=1 SV=1 2.07998e-14	tr|V4TJD2|V4TJD2_9ROSI Uncharacterized protein (Fragment) OS=Citrus clementina GN=CICLE_v10017555mg PE=4 SV=1 9.0e-13	GO:0005768, endosome;GO:0005794, Golgi apparatus;GO:0005802, trans-Golgi network;GO:0005886, plasma membrane;GO:0015031, protein transport;GO:0016020, membrane;GO:0016021, integral component of membrane;GO:0030658, transport vesicle membrane	-
TRINITY_DN82168_c0_g4	1.483019	12.7421388563	-3.10299847787	9.23327616216e-05	0.005308027318109999	down	TIGR02766, crypt_chrom_pln, cryptochrome, plant family. At least five major families of cryptochomes and photolyases share FAD cofactor binding, sequence homology, and the ability to react to short wavelengths of visible light. Photolysases are responsible for light-dependent DNA repair by removal of two types of uv-induced DNA dimerizations. Cryptochromes have other functions, often regulatory a…	KOG0133, KOG0133, KOG0133, Deoxyribodipyrimidine photolyase/cryptochrome [Replication, recombination and repair, Signal transduction mechanisms]. 8.37858e-56	gi|1021029329|gb|KZM87114.1| hypothetical protein DCAR_024248 [Daucus carota subsp. sativus] 8.8e-245	gi|731389709|ref|XM_002285133.3| PREDICTED: Vitis vinifera cryptochrome-1 (LOC100247664), transcript variant X3, mRNA 0.0	pfam03441, FAD_binding_7, FAD binding domain of DNA photolyase. 6.89663e-31	sp|Q96524|CRY2_ARATH Cryptochrome-2 OS=Arabidopsis thaliana GN=CRY2 PE=1 SV=2 0.0	tr|A0A068TTH2|A0A068TTH2_COFCA Uncharacterized protein OS=Coffea canephora GN=GSCOC_T00026304001 PE=4 SV=1 1.3e-208	GO:0005524, ATP binding;GO:0005634, nucleus;GO:0005737, cytoplasm;GO:0005773, vacuole;GO:0006325, chromatin organization;GO:0006338, chromatin remodeling;GO:0007623, circadian rhythm;GO:0009414, response to water deprivation;GO:0009416, response to light stimulus;GO:0009637, response to blue light;GO:0009638, phototropism;GO:0009646, response to absence of light;GO:0009882, blue light photorecept…	K12119-ko04712 Circadian rhythm - plant
TRINITY_DN87959_c0_g4	14.7430803333	1.80951236667	3.02636511162	7.78347924854e-05	0.00474434524923	up	pfam05405, Mt_ATP-synt_B, Mitochondrial ATP synthase B chain precursor (ATP-synt_B). The Fo sector of the ATP synthase is a membrane bound complex which mediates proton transport. It is composed of nine different polypeptide subunits (a, b, c, d, e, f, g F6, A6L). 1.89164e-16	-	gi|372450260|ref|YP_005090443.1| ATPase subunit 4 (mitochondrion) [Millettia pinnata] 1.5e-61	gi|374081932|gb|JQ248574.1| Daucus carota subsp. sativus mitochondrion, complete genome 0.0	pfam05405, Mt_ATP-synt_B, Mitochondrial ATP synthase B chain precursor (ATP-synt_B). The Fo sector of the ATP synthase is a membrane bound complex which mediates proton transport. It is composed of nine different polypeptide subunits (a, b, c, d, e, f, g F6, A6L). 4.5193e-17	sp|Q04613|MI25_ARATH ATP synthase protein MI25 OS=Arabidopsis thaliana GN=AtMg00640 PE=1 SV=2 3.90017e-78	tr|Q5MA26|Q5MA26_TOBAC Uncharacterized protein OS=Nicotiana tabacum GN=orf25(atp4) PE=4 SV=2 1.1e-61	GO:0005739, mitochondrion;GO:0015078, proton transmembrane transporter activity;GO:0015986, ATP synthesis coupled proton transport;GO:0016021, integral component of membrane;GO:0031966, mitochondrial membrane;GO:0045263, proton-transporting ATP synthase complex, coupling factor F(o)	-
TRINITY_DN78898_c0_g1	7.821689999999999	1.421543	2.46002261883	0.00284380156976	0.0410956214831	up	-	-	-	-	-	-	-	-	-
TRINITY_DN84988_c0_g1	0.25671700000000003	7.41399366667	-4.85200014217	0.00029403900221499995	0.010809219845399998	down	PLN02520, PLN02520, bifunctional 3-dehydroquinate dehydratase/shikimate dehydrogenase. 2.46058e-112	-	gi|1021025215|gb|KZM83003.1| hypothetical protein DCAR_030572 [Daucus carota subsp. sativus] 6.9e-105	gi|1002873886|ref|XM_015842833.1| PREDICTED: Oryza brachyantha bifunctional 3-dehydroquinate dehydratase/shikimate dehydrogenase, chloroplastic-like (LOC102718704), mRNA 1.18582e-47	pfam01487, DHquinase_I, Type I 3-dehydroquinase. Type I 3-dehydroquinase, (3-dehydroquinate dehydratase or DHQase.) catalyzes the cis-dehydration of 3-dehydroquinate via a covalent imine intermediate giving dehydroshikimate. Dehydroquinase functions in the shikimate pathway which is involved in the biosynthesis of aromatic amino acids. Type II 3-dehydroquinase catalyzes the trans-dehydration of 3…	sp|Q9SQT8|DHQSD_ARATH Bifunctional 3-dehydroquinate dehydratase/shikimate dehydrogenase, chloroplastic OS=Arabidopsis thaliana GN=EMB3004 PE=1 SV=1 5.41447e-96	tr|A0A067GHR3|A0A067GHR3_CITSI Uncharacterized protein (Fragment) OS=Citrus sinensis GN=CISIN_1g0071512mg PE=3 SV=1 1.3e-90	GO:0003855, 3-dehydroquinate dehydratase activity;GO:0004764, shikimate 3-dehydrogenase (NADP+) activity;GO:0009073, aromatic amino acid family biosynthetic process;GO:0009423, chorismate biosynthetic process;GO:0009507, chloroplast;GO:0009570, chloroplast stroma;GO:0009793, embryo development ending in seed dormancy;GO:0019632, shikimate metabolic process;GO:0050661, NADP binding	K13832-ko01230 Biosynthesis of amino acids;ko00400 Phenylalanine, tyrosine and tryptophan biosynthesis
TRINITY_DN77522_c3_g1	0.124638666667	8.409628333330001	-6.0762184311	0.00014894886128400002	0.007062241738989999	down	PLN03004, PLN03004, UDP-glycosyltransferase. 2.26893e-11	-	gi|1021034568|gb|KZM92352.1| UDP-glycosyltransferase [Daucus carota subsp. sativus] 1.2e-44	-	-	sp|Q6VAA7|U88B1_STERE UDP-glycosyltransferase 88B1 OS=Stevia rebaudiana GN=UGT88B1 PE=2 SV=1 2.87226e-20	tr|F6H6Q6|F6H6Q6_VITVI Glycosyltransferase OS=Vitis vinifera GN=VIT_16s0050g01580 PE=3 SV=1 6.1e-25	GO:0008152, metabolic process;GO:0009813, flavonoid biosynthetic process;GO:0016758, transferase activity, transferring hexosyl groups;GO:0043231, intracellular membrane-bounded organelle;GO:0052696, flavonoid glucuronidation;GO:0080043, quercetin 3-O-glucosyltransferase activity;GO:0080044, quercetin 7-O-glucosyltransferase activity	-
TRINITY_DN64460_c0_g1	7.164339999999999	0.0001	16.1285461849	0.00025346346826400005	0.00981766637331	up	-	-	gi|1021035227|gb|KZM93010.1| hypothetical protein DCAR_016255 [Daucus carota subsp. sativus] 8.9e-19	-	-	-	tr|M5WWR7|M5WWR7_PRUPE Uncharacterized protein OS=Prunus persica GN=PRUPE_ppa026148mg PE=4 SV=1 6.3e-09	-	-
TRINITY_DN92741_c1_g3	13.530663	0.34338333333300003	5.30026870512	4.290300481730001e-06	0.000652658192955	up	-	-	-	-	-	-	-	-	-
TRINITY_DN83479_c0_g1	0.692115033333	8.240841633330001	-3.5737079399400002	0.000129355719979	0.0064288902086099995	down	COG5184, ATS1, Alpha-tubulin suppressor and related RCC1 domain-containing proteins [Cell division and chromosome partitioning / Cytoskeleton]. 1.20139e-08	KOG1427, KOG1427, KOG1427, Uncharacterized conserved protein, contains RCC1 domain [Function unknown]. 2.06511e-11	gi|1021028300|gb|KZM86087.1| hypothetical protein DCAR_026491 [Daucus carota subsp. sativus] 2.4e-168	gi|596138083|ref|XM_007222312.1| Prunus persica hypothetical protein (PRUPE_ppa004014mg) mRNA, complete cds 0.0	-	sp|O95714|HERC2_HUMAN E3 ubiquitin-protein ligase HERC2 OS=Homo sapiens GN=HERC2 PE=1 SV=2 1.08306e-13	tr|A0A067JVB4|A0A067JVB4_JATCU Uncharacterized protein OS=Jatropha curcas GN=JCGZ_17876 PE=4 SV=1 1.4e-139	GO:0004842, ubiquitin-protein transferase activity;GO:0005085, guanyl-nucleotide exchange factor activity;GO:0005634, nucleus;GO:0005654, nucleoplasm;GO:0005737, cytoplasm;GO:0005743, mitochondrial inner membrane;GO:0005814, centriole;GO:0006303, double-strand break repair via nonhomologous end joining;GO:0006886, intracellular protein transport;GO:0006974, cellular response to DNA damage stimulu…	-
TRINITY_DN74963_c2_g4	13.629179999999998	0.105272	7.016433192	2.86331280857e-06	0.00048435471381900005	up	-	-	-	-	-	-	-	-	-
TRINITY_DN97864_c1_g1	63.008995	24.7272007332	1.3494588714200002	0.00215708170839	0.0348464452951	up	PTZ00184, PTZ00184, calmodulin; Provisional. 1.24027e-17	KOG0027, KOG0027, KOG0027, Calmodulin and related proteins (EF-Hand superfamily) [Signal transduction mechanisms]. 2.39737e-16	gi|1021033311|gb|KZM91095.1| hypothetical protein DCAR_021540 [Daucus carota subsp. sativus] 6.5e-87	gi|743850314|ref|XM_011030398.1| PREDICTED: Populus euphratica calcium-dependent protein kinase 10-like (LOC105128637), mRNA 2.43035e-101	-	sp|Q9M9V8|CDPKA_ARATH Calcium-dependent protein kinase 10 OS=Arabidopsis thaliana GN=CPK10 PE=1 SV=1 5.66494e-83	tr|A0A0B0NSJ6|A0A0B0NSJ6_GOSAR Calcium-dependent protein kinase 10 OS=Gossypium arboreum GN=F383_03496 PE=3 SV=1 1.5e-75	GO:0004672, protein kinase activity;GO:0004674, protein serine/threonine kinase activity;GO:0004683, calmodulin-dependent protein kinase activity;GO:0005509, calcium ion binding;GO:0005516, calmodulin binding;GO:0005524, ATP binding;GO:0005634, nucleus;GO:0005737, cytoplasm;GO:0005886, plasma membrane;GO:0009738, abscisic acid-activated signaling pathway;GO:0009931, calcium-dependent protein seri…	-
TRINITY_DN73736_c2_g1	67.69376048	4.44486266667	3.92881211299	7.78183617373e-05	0.00474434524923	up	PLN02481, PLN02481, Omega-hydroxypalmitate O-feruloyl transferase. 1.08577e-59	-	gi|1021045293|gb|KZN03074.1| hypothetical protein DCAR_011830 [Daucus carota subsp. sativus] 5.6e-212	-	pfam02458, Transferase, Transferase family. This family includes a number of transferase enzymes. These include anthranilate N-hydroxycinnamoyl/benzoyltransferase that catalyzes the first committed reaction of phytoalexin biosynthesis. Deacetylvindoline 4-O-acetyltransferase EC:2.3.1.107 catalyzes the last step in vindoline biosynthesis is also a member of this family. The motif HXXXD is probably…	sp|Q94CD1|HHT1_ARATH Omega-hydroxypalmitate O-feruloyl transferase OS=Arabidopsis thaliana GN=HHT1 PE=1 SV=1 2.68827e-55	tr|A0A0D2TKG5|A0A0D2TKG5_GOSRA Uncharacterized protein OS=Gossypium raimondii GN=B456_012G078300 PE=4 SV=1 3.7e-155	GO:0010345, suberin biosynthetic process;GO:0016747, transferase activity, transferring acyl groups other than amino-acyl groups;GO:0050734, hydroxycinnamoyltransferase activity;GO:0052325, cell wall pectin biosynthetic process	-
TRINITY_DN79578_c0_g1	0.38361100000000004	8.36221333333	-4.44616885412	0.00320463700774	0.0441305079736	down	-	-	-	-	-	-	-	-	-
TRINITY_DN69340_c0_g1	0.9689183333329999	17.575187775899998	-4.18102122197	7.97151440035e-05	0.004820490344220001	down	cd08948, 5beta-POR_like_SDR_a, progesterone 5-beta-reductase-like proteins (5beta-POR), atypical (a) SDRs. 5beta-POR catalyzes the reduction of progesterone to 5beta-pregnane-3,20-dione in Digitalis plants. This subgroup of atypical-extended SDRs, shares the structure of an extended SDR, but has a different glycine-rich nucleotide binding motif (GXXGXXG) and lacks the YXXXK active site motif of c…	-	gi|1021032884|gb|KZM90668.1| hypothetical protein DCAR_021967 [Daucus carota subsp. sativus] 1.4e-56	gi|411171740|gb|JX673780.1| Bupleurum falcatum putative progesterone 5beta-reductase mRNA, complete cds 4.60412e-81	-	sp|Q6PQJ9|5BPOR_DIGLA 3-oxo-Delta(4,5)-steroid 5-beta-reductase OS=Digitalis lanata PE=1 SV=1 1.78878e-51	tr|K7TNM5|K7TNM5_BUPFA Putative progesterone 5beta-reductase OS=Bupleurum falcatum PE=2 SV=1 3.4e-55	GO:0000166, nucleotide binding;GO:0047568, 3-oxo-5-beta-steroid 4-dehydrogenase activity;GO:0047787, delta4-3-oxosteroid 5beta-reductase activity;GO:0050662, coenzyme binding	-
TRINITY_DN87704_c1_g1	0.5786293666669999	11.303555000000001	-4.287993220490001	0.0013794614877200002	0.026856672877299998	down	pfam02309, AUX_IAA, AUX/IAA family. Transcription of the AUX/IAA family of genes is rapidly induced by the plant hormone auxin. Some members of this family are longer and contain an N terminal DNA binding domain. The function of this region is uncertain. 2.61877e-33	-	gi|1021029283|gb|KZM87068.1| hypothetical protein DCAR_024202 [Daucus carota subsp. sativus] 1.3e-80	gi|747087156|ref|XM_011092807.1| PREDICTED: Sesamum indicum auxin-induced protein 22D (LOC105171635), mRNA 4.52638e-67	pfam02309, AUX_IAA, AUX/IAA family. Transcription of the AUX/IAA family of genes is rapidly induced by the plant hormone auxin. Some members of this family are longer and contain an N terminal DNA binding domain. The function of this region is uncertain. 6.25646e-34	sp|O24542|AX22D_VIGRR Auxin-induced protein 22D OS=Vigna radiata var. radiata GN=AUX22D PE=2 SV=1 7.18206e-68	tr|A0A061EUB8|A0A061EUB8_THECC Auxin-responsive protein OS=Theobroma cacao GN=TCM_020770 PE=3 SV=1 1.6e-59	GO:0005634, nucleus;GO:0006351, transcription, DNA-templated;GO:0006355, regulation of transcription, DNA-templated;GO:0009734, auxin-activated signaling pathway	K14484-ko04075 Plant hormone signal transduction
TRINITY_DN80025_c0_g2	39.8548336	12.1165117216	1.7177802906200001	0.0022096395968499998	0.0353613104934	up	PTZ00100, PTZ00100, DnaJ chaperone protein; Provisional. 1.40257e-10	KOG0723, KOG0723, KOG0723, Molecular chaperone (DnaJ superfamily) [Posttranslational modification, protein turnover, chaperones]. 1.80703e-13	gi|1021039892|gb|KZM97673.1| hypothetical protein DCAR_014965 [Daucus carota subsp. sativus] 3.4e-21	gi|1009162403|ref|XM_016043932.1| PREDICTED: Ziziphus jujuba mitochondrial import inner membrane translocase subunit TIM14-2 (LOC107432752), mRNA 3.19735e-40	-	sp|Q9SF33|TI142_ARATH Mitochondrial import inner membrane translocase subunit TIM14-2 OS=Arabidopsis thaliana GN=TIM14-2 PE=3 SV=1 5.90979e-22	tr|C6T2E9|C6T2E9_SOYBN Uncharacterized protein OS=Glycine max GN=GLYMA_13G137400 PE=2 SV=1 1.8e-19	GO:0005743, mitochondrial inner membrane;GO:0016021, integral component of membrane	-
TRINITY_DN94372_c0_g7	41.7587333333	3.7501733333300002	3.47704876759	4.04109115086e-05	0.00313616676089	up	-	-	-	-	-	-	-	-	-
TRINITY_DN94546_c2_g1	0.421231	24.8558523333	-5.8828301517199995	0.000143160615315	0.0068671518428	down	pfam05153, MIOX, Myo-inositol oxygenase. MIOX is the enzyme myo-inositol oxygenase. It catalyzes the first committed step in the glucuronate-xylulose pathway, It is a di-iron oxygenase with a key role in inositol metabolizm. The structure reveals a monomeric, single-domain protein with a mostly helical fold that is distantly related to the diverse HD domain superfamily. The structural core is of …	KOG1573, KOG1573, KOG1573, Aldehyde reductase [General function prediction only]. 5.55457e-09	gi|1021048982|gb|KZN06762.1| hypothetical protein DCAR_007599 [Daucus carota subsp. sativus] 1.9e-06	gi|1009155602|ref|XM_016040315.1| PREDICTED: Ziziphus jujuba inositol oxygenase 1-like (LOC107429605), mRNA 1.84835e-12	pfam05153, MIOX, Myo-inositol oxygenase. MIOX is the enzyme myo-inositol oxygenase. It catalyzes the first committed step in the glucuronate-xylulose pathway, It is a di-iron oxygenase with a key role in inositol metabolizm. The structure reveals a monomeric, single-domain protein with a mostly helical fold that is distantly related to the diverse HD domain superfamily. The structural core is of …	sp|Q8L799|MIOX1_ARATH Inositol oxygenase 1 OS=Arabidopsis thaliana GN=MIOX1 PE=2 SV=1 1.00108e-15	tr|D7TBD4|D7TBD4_VITVI Putative uncharacterized protein OS=Vitis vinifera GN=VIT_11s0016g02800 PE=4 SV=1 4.2e-06	GO:0005506, iron ion binding;GO:0005737, cytoplasm;GO:0019310, inositol catabolic process;GO:0019853, L-ascorbic acid biosynthetic process;GO:0050113, inositol oxygenase activity	-
TRINITY_DN81007_c0_g4	25.2991666667	1.49859433333	4.07740805812	7.50387211206e-06	0.000951821009087	up	-	-	-	-	-	-	-	-	-
TRINITY_DN94744_c0_g1	14.1668266667	1.9212766666699999	2.88237944512	0.000468372629436	0.0141042745383	up	-	-	-	-	-	-	-	-	-
TRINITY_DN69358_c1_g1	0.77	6.022425902209999	-2.9674143872400003	0.00322801343994	0.044274085519	down	pfam03398, Ist1, Regulator of Vps4 activity in the MVB pathway. ESCRT-I, -II, and -III are endosomal sorting complexes required for transporting proteins and carry out cargo sorting and vesicle formation in the multivesicular bodies, MVBs, pathway. These complexes are transiently recruited from the cytoplasm to the endosomal membrane where they bind transmembrane proteins previously marked for de…	KOG2027, KOG2027, KOG2027, Spindle pole body protein [Cytoskeleton]. 1.48413e-45	gi|698518629|ref|XP_009804183.1| PREDICTED: IST1 homolog [Nicotiana sylvestris] 1.3e-59	gi|1009155254|ref|XM_016040127.1| PREDICTED: Ziziphus jujuba IST1 homolog (LOC107429444), mRNA 9.9831e-75	pfam03398, Ist1, Regulator of Vps4 activity in the MVB pathway. ESCRT-I, -II, and -III are endosomal sorting complexes required for transporting proteins and carry out cargo sorting and vesicle formation in the multivesicular bodies, MVBs, pathway. These complexes are transiently recruited from the cytoplasm to the endosomal membrane where they bind transmembrane proteins previously marked for de…	sp|Q3ZBV1|IST1_BOVIN IST1 homolog OS=Bos taurus GN=IST1 PE=2 SV=1 7.38219e-21	tr|K4BNN0|K4BNN0_SOLLC Uncharacterized protein OS=Solanum lycopersicum PE=4 SV=1 4.9e-59	GO:0005635, nuclear envelope;GO:0005815, microtubule organizing center;GO:0007049, cell cycle;GO:0015031, protein transport;GO:0030496, midbody;GO:0051301, cell division	K19476-ko04144 Endocytosis
TRINITY_DN97743_c2_g1	11.9620909668	4.3424724	1.4618810093099999	0.000984246640979	0.0219101127684	up	-	-	-	-	-	-	-	-	-
TRINITY_DN85679_c1_g2	42.480133333299996	4.4458	3.2562733409099995	0.000201221607572	0.00852035039549	up	-	-	-	-	-	-	-	-	-
TRINITY_DN83013_c0_g1	27.2980953333	6.66931033333	2.03319080708	0.00174316327366	0.0308026813838	up	-	-	-	-	-	-	-	-	-
TRINITY_DN74652_c0_g3	0.800457	6.82101	-3.09108956833	0.0010381443511399998	0.0226139311257	down	-	-	gi|1021048328|gb|KZN06108.1| hypothetical protein DCAR_006945 [Daucus carota subsp. sativus] 3.9e-86	gi|702334031|ref|XM_010056783.1| PREDICTED: Eucalyptus grandis uncharacterized LOC104443412 (LOC104443412), mRNA 4.14317e-12	-	-	tr|F6I646|F6I646_VITVI Putative uncharacterized protein OS=Vitis vinifera GN=VIT_15s0046g02270 PE=4 SV=1 2.0e-45	-	-
TRINITY_DN68639_c0_g1	28.9955906667	3.3528346666699997	3.1123802790599995	0.00021398956108000002	0.008843684996780002	up	-	-	gi|1021040125|gb|KZM97906.1| hypothetical protein DCAR_014732 [Daucus carota subsp. sativus] 1.8e-11	-	-	-	-	-	-
TRINITY_DN73110_c0_g1	0.536867976667	10.6172497333	-4.30569893911	1.2490471536700002e-07	4.77260917418e-05	down	cd07821, PYR_PYL_RCAR_like, Pyrabactin resistance 1 (PYR1), PYR1-like (PYL), regulatory component of abscisic acid receptors (RCARs), and related proteins. The PYR/PYL/RCAR-like family belongs to the SRPBCC (START/RHO_alpha_C/PITP/Bet_v1/CoxG/CalC) domain superfamily of proteins that bind hydrophobic ligands. SRPBCC domains have a deep hydrophobic ligand-binding pocket. PYR/PYL/RCAR plant protein…	-	gi|1021050042|gb|KZN07822.1| hypothetical protein DCAR_008659 [Daucus carota subsp. sativus] 3.1e-71	gi|1026078018|ref|XM_016682716.1| PREDICTED: Capsicum annuum abscisic acid receptor PYL8 (LOC107839295), mRNA 4.57401e-69	-	sp|Q84MC7|PYL9_ARATH Abscisic acid receptor PYL9 OS=Arabidopsis thaliana GN=PYL9 PE=1 SV=1 1.03376e-75	tr|V4VIV5|V4VIV5_9ROSI Uncharacterized protein OS=Citrus clementina GN=CICLE_v10022206mg PE=4 SV=1 1.6e-62	GO:0004864, protein phosphatase inhibitor activity;GO:0005634, nucleus;GO:0005737, cytoplasm;GO:0005886, plasma membrane;GO:0009738, abscisic acid-activated signaling pathway;GO:0010427, abscisic acid binding;GO:0042803, protein homodimerization activity;GO:0080163, regulation of protein serine/threonine phosphatase activity	K14496-ko04016 MAPK signaling pathway - plant;ko04075 Plant hormone signal transduction
TRINITY_DN71250_c1_g2	21.809616666700002	4.29279682809	2.34497461407	0.0006154197657230001	0.0166704844546	up	-	-	-	-	-	-	-	-	-
TRINITY_DN90531_c2_g4	7.83778	0.1950402	5.32860166269	0.0016610885727	0.029933978155099995	up	-	-	-	-	-	-	-	-	-
TRINITY_DN80662_c0_g2	390.81066666699996	61.8456333333	2.65972620319	0.000108838921747	0.00587196830557	up	-	-	-	-	-	sp|Q6NPR7|PMTO_ARATH Probable methyltransferase PMT24 OS=Arabidopsis thaliana GN=At1g29470 PE=2 SV=1 2.81127e-09	-	GO:0000139, Golgi membrane;GO:0005768, endosome;GO:0005774, vacuolar membrane;GO:0005794, Golgi apparatus;GO:0005802, trans-Golgi network;GO:0008757, S-adenosylmethionine-dependent methyltransferase activity;GO:0016021, integral component of membrane;GO:0032259, methylation	-
TRINITY_DN98810_c3_g2	2.9037188	49.004396909700006	-4.07693754786	0.0023733954217399996	0.0368471908245	down	cd14662, STKc_SnRK2, Catalytic domain of the Serine/Threonine Kinases, Sucrose nonfermenting 1-related protein kinase subfamily 2. STKs catalyze the transfer of the gamma-phosphoryl group from ATP to serine/threonine residues on protein substrates. The SnRKs form three different subfamilies designated SnRK1-3. SnRK2 is represented in this cd. SnRK2s are involved in plant response to abiotic stres…	KOG0583, KOG0583, KOG0583, Serine/threonine protein kinase [Signal transduction mechanisms]. 4.318e-53	gi|449451411|ref|XP_004143455.1| PREDICTED: serine/threonine-protein kinase SAPK2 [Cucumis sativus] 3.0e-95	gi|743826557|ref|XM_011024522.1| PREDICTED: Populus euphratica serine/threonine-protein kinase SAPK2-like (LOC105124488), transcript variant X2, mRNA 1.80386e-152	pfam00069, Pkinase, Protein kinase domain. 2.88894e-34	sp|Q7Y0B9|SAPK8_ORYSJ Serine/threonine-protein kinase SAPK8 OS=Oryza sativa subsp. japonica GN=SAPK8 PE=2 SV=1 8.28643e-121	tr|A0A0A0KG81|A0A0A0KG81_CUCSA Uncharacterized protein OS=Cucumis sativus GN=Csa_6G499740 PE=3 SV=1 2.3e-95	GO:0004674, protein serine/threonine kinase activity;GO:0005524, ATP binding;GO:0005634, nucleus;GO:0005737, cytoplasm;GO:0006468, protein phosphorylation;GO:0009738, abscisic acid-activated signaling pathway;GO:0035556, intracellular signal transduction	K14498-ko04016 MAPK signaling pathway - plant;ko04075 Plant hormone signal transduction
TRINITY_DN97789_c1_g2	5.644266666669999	0.42458900000000005	3.73264725016	0.000493117449011	0.0145346544885	up	-	-	-	-	-	-	-	-	-
TRINITY_DN97009_c1_g1	5.706681066669999	0.187431	4.92822044511	5.28955122458e-05	0.00365524871165	up	-	-	-	-	-	-	-	-	-
TRINITY_DN94305_c0_g1	128.37458133299998	2.679712	5.582137804809999	1.62282817243e-07	5.85633608871e-05	up	cd06632, STKc_MEKK1_plant, Catalytic domain of the Serine/Threonine Kinase, Plant Mitogen-Activated Protein (MAP)/Extracellular signal-Regulated Kinase (ERK) Kinase Kinase 1. STKs catalyze the transfer of the gamma-phosphoryl group from ATP to serine/threonine residues on protein substrates. This subfamily is composed of plant MAPK kinase kinases (MAPKKKs) including Arabidopsis thaliana MEKK1 and…	KOG0198, KOG0198, KOG0198, MEKK and related serine/threonine protein kinases [Signal transduction mechanisms]. 1.00181e-09	gi|1021048117|gb|KZN05897.1| hypothetical protein DCAR_006734 [Daucus carota subsp. sativus] 1.6e-20	gi|146424711|dbj|AP009391.1| Solanum lycopersicum genomic DNA, chromosome 8, complete sequence, clone: C08HBa0012O06 7.01216e-15	-	sp|Q6RVV4|TIC32_PEA Short-chain dehydrogenase TIC 32, chloroplastic OS=Pisum sativum GN=TIC32 PE=1 SV=1 6.80104e-16	tr|B9GKG5|B9GKG5_POPTR Uncharacterized protein OS=Populus trichocarpa GN=POPTR_0001s09520g PE=4 SV=2 2.5e-18	GO:0004702, signal transducer, downstream of receptor, with serine/threonine kinase activity;GO:0005524, ATP binding;GO:0005737, cytoplasm;GO:0009706, chloroplast inner membrane;GO:0015031, protein transport;GO:0016491, oxidoreductase activity	-
TRINITY_DN87246_c2_g2	383.53926733300005	60.9479056667	2.65372573866	0.000231989116121	0.00929630907826	up	cd00143, PP2Cc, Serine/threonine phosphatases, family 2C, catalytic domain; The protein architecture and deduced catalytic mechanism of PP2C phosphatases are similar to the PP1, PP2A, PP2B family of protein Ser/Thr phosphatases, with which PP2C shares no sequence similarity. 5.42099e-13	KOG0698, KOG0698, KOG0698, Serine/threonine protein phosphatase [Signal transduction mechanisms]. 1.94558e-14	gi|1021045289|gb|KZN03070.1| hypothetical protein DCAR_011826 [Daucus carota subsp. sativus] 9.4e-35	-	pfam00481, PP2C, Protein phosphatase 2C. Protein phosphatase 2C is a Mn++ or Mg++ dependent protein serine/threonine phosphatase. 1.13995e-07	sp|Q9XEE8|P2C30_ARATH Probable protein phosphatase 2C 30 OS=Arabidopsis thaliana GN=PP2C5 PE=2 SV=1 8.75724e-27	tr|A0A061FKA5|A0A061FKA5_THECC Phosphatase 2C5 OS=Theobroma cacao GN=TCM_042479 PE=3 SV=1 1.4e-27	GO:0004722, protein serine/threonine phosphatase activity;GO:0005634, nucleus;GO:0009738, abscisic acid-activated signaling pathway;GO:0010440, stomatal lineage progression;GO:0046872, metal ion binding	-
TRINITY_DN70455_c1_g1	11.221070776700001	2.68843747293	2.0613705292200004	0.00224564854872	0.0357241696823	up	pfam07727, RVT_2, Reverse transcriptase (RNA-dependent DNA polymerase). A reverse transcriptase gene is usually indicative of a mobile element such as a retrotransposon or retrovirus. Reverse transcriptases occur in a variety of mobile elements, including retrotransposons, retroviruses, group II introns, bacterial msDNAs, hepadnaviruses, and caulimoviruses. This Pfam entry includes reverse transc…	-	gi|147785835|emb|CAN73071.1| hypothetical protein VITISV_032383 [Vitis vinifera] 1.6e-162	gi|158341697|gb|AC212843.1| Populus trichocarpa clone POP014-M10, complete sequence 1.27755e-11	pfam07727, RVT_2, Reverse transcriptase (RNA-dependent DNA polymerase). A reverse transcriptase gene is usually indicative of a mobile element such as a retrotransposon or retrovirus. Reverse transcriptases occur in a variety of mobile elements, including retrotransposons, retroviruses, group II introns, bacterial msDNAs, hepadnaviruses, and caulimoviruses. This Pfam entry includes reverse transc…	sp|P10978|POLX_TOBAC Retrovirus-related Pol polyprotein from transposon TNT 1-94 OS=Nicotiana tabacum PE=2 SV=1 2.05663e-111	tr|A5C5R8|A5C5R8_VITVI Putative uncharacterized protein OS=Vitis vinifera GN=VITISV_032383 PE=4 SV=1 1.2e-162	GO:0003676, nucleic acid binding;GO:0003964, RNA-directed DNA polymerase activity;GO:0004190, aspartic-type endopeptidase activity;GO:0004519, endonuclease activity;GO:0008270, zinc ion binding;GO:0015074, DNA integration	-
TRINITY_DN81650_c1_g1	26.971746500000002	3.43044366667	2.97498186292	0.0009315825358250001	0.021269879360099997	up	cd14066, STKc_IRAK, Catalytic domain of the Serine/Threonine kinases, Interleukin-1 Receptor Associated Kinases and related STKs. STKs catalyze the transfer of the gamma-phosphoryl group from ATP to serine/threonine residues on protein substrates. IRAKs are involved in Toll-like receptor (TLR) and interleukin-1 (IL-1) signalling pathways, and are thus critical in regulating innate immune response…	KOG1187, KOG1187, KOG1187, Serine/threonine protein kinase [Signal transduction mechanisms]. 7.56987e-33	gi|1021047664|gb|KZN05444.1| hypothetical protein DCAR_006281 [Daucus carota subsp. sativus] 3.1e-66	gi|663673440|emb|HG975441.1| Solanum pennellii chromosome ch02, complete genome 2.99247e-11	-	sp|P27450|CX32_ARATH Probable serine/threonine-protein kinase Cx32, chloroplastic OS=Arabidopsis thaliana GN=At4g35600 PE=1 SV=2 8.31152e-46	tr|A0A0V0HX72|A0A0V0HX72_SOLCH Putative serine/threonine-protein kinase Cx32, chloroplastic-like (Fragment) OS=Solanum chacoense PE=3 SV=1 9.2e-55	GO:0004674, protein serine/threonine kinase activity;GO:0005524, ATP binding;GO:0009507, chloroplast	-
TRINITY_DN75383_c0_g1	17.5472853333	1.2803623333299998	3.7766238090699993	2.49311703261e-06	0.000438876431132	up	-	-	-	-	-	-	-	-	-
TRINITY_DN74163_c0_g1	8.90028233333	0.09939566666670001	6.48452433525	0.00038784462658699993	0.0126981972829	up	-	-	-	-	-	-	-	-	-
TRINITY_DN68559_c0_g1	27.9327333333	8.19568	1.7690211936000002	0.00391734300928	0.0493232893688	up	-	-	-	-	-	-	-	-	-
TRINITY_DN84002_c1_g1	1.0944131000000001	8.27755617667	-2.9190474923500003	0.0007491757325389999	0.0188256124017	down	-	-	gi|1021048107|gb|KZN05887.1| hypothetical protein DCAR_006724 [Daucus carota subsp. sativus] 1.8e-19	-	-	sp|Q9LFP7|Y5158_ARATH Probable receptor-like protein kinase At5g15080 OS=Arabidopsis thaliana GN=At5g15080 PE=2 SV=1 1.54434e-09	tr|A0A068U119|A0A068U119_COFCA Uncharacterized protein OS=Coffea canephora GN=GSCOC_T00039538001 PE=3 SV=1 2.9e-14	GO:0004674, protein serine/threonine kinase activity;GO:0005524, ATP binding;GO:0005886, plasma membrane;GO:0016021, integral component of membrane	-
TRINITY_DN71031_c0_g5	7.42087333333	64.0008666667	-3.1084305544300004	0.00260289617187	0.0387967706829	down	-	-	-	-	-	-	-	-	-
TRINITY_DN80955_c0_g1	0.6991890000000001	7.583063333330001	-3.4390263793699996	0.00129398088114	0.025775257925800002	down	cd15795, PMEI-Pla_a_1_like, Pollen allergen Pla a 1 and similar plant proteins. The major Platanus acerifolia pollen allergen Pla a 1 belongs to a class of allergens related to proteinaceous invertase and pectin methylesterase inhibitors. Platanus acerifolia is an important cause of pollinosis; Pla a 1 has a prevalence of about 80% among plane tree pollen-allergic patients. Recombinant Pla a 1 bi…	-	gi|1021030138|gb|KZM87923.1| hypothetical protein DCAR_025024 [Daucus carota subsp. sativus] 9.6e-80	-	pfam04043, PMEI, Plant invertase/pectin methylesterase inhibitor. This domain inhibits pectin methylesterases (PMEs) and invertases through formation of a non-covalent 1:1 complex. It has been implicated in the regulation of fruit development, carbohydrate metabolizm and cell wall extension. It may also be involved in inhibiting microbial pathogen PMEs. It has been observed that it is often expre…	sp|Q8GT41|PLA1_PLAAC Putative invertase inhibitor OS=Platanus acerifolia PE=1 SV=1 2.23035e-31	tr|K4AYP9|K4AYP9_SOLLC Uncharacterized protein OS=Solanum lycopersicum PE=4 SV=1 1.0e-57	GO:0004857, enzyme inhibitor activity;GO:0005576, extracellular region;GO:0030599, pectinesterase activity;GO:0046910, pectinesterase inhibitor activity;GO:0071944, cell periphery	-
TRINITY_DN93611_c0_g1	9.255780066669999	2.152992	2.10401162512	0.0016614052136899999	0.029933978155099995	up	pfam00454, PI3_PI4_kinase, Phosphatidylinositol 3- and 4-kinase. Some members of this family probably do not have lipid kinase activity and are protein kinases. 1.42844e-08	KOG2381, KOG2381, KOG2381, Phosphatidylinositol 4-kinase [Signal transduction mechanisms]. 6.37278e-61	gi|1021035861|gb|KZM93644.1| hypothetical protein DCAR_016889 [Daucus carota subsp. sativus] 4.0e-258	gi|595819893|ref|XM_007204507.1| Prunus persica hypothetical protein (PRUPE_ppa003750mg) mRNA, complete cds 1.28944e-137	pfam00454, PI3_PI4_kinase, Phosphatidylinositol 3- and 4-kinase. Some members of this family probably do not have lipid kinase activity and are protein kinases. 3.41266e-09	sp|O22199|P4KG1_ARATH Phosphatidylinositol 4-kinase gamma 1 OS=Arabidopsis thaliana GN=PI4KG1 PE=2 SV=1 3.18891e-165	tr|A0A068UCL3|A0A068UCL3_COFCA Uncharacterized protein OS=Coffea canephora GN=GSCOC_T00023035001 PE=4 SV=1 4.1e-186	GO:0004430, 1-phosphatidylinositol 4-kinase activity;GO:0005524, ATP binding;GO:0016301, kinase activity	-
TRINITY_DN85154_c0_g4	0.06538266666669999	6.651135000000001	-6.66854852441	0.00204583562079	0.0336604215855	down	cd14066, STKc_IRAK, Catalytic domain of the Serine/Threonine kinases, Interleukin-1 Receptor Associated Kinases and related STKs. STKs catalyze the transfer of the gamma-phosphoryl group from ATP to serine/threonine residues on protein substrates. IRAKs are involved in Toll-like receptor (TLR) and interleukin-1 (IL-1) signalling pathways, and are thus critical in regulating innate immune response…	KOG1187, KOG1187, KOG1187, Serine/threonine protein kinase [Signal transduction mechanisms]. 1.9472e-31	gi|661893893|emb|CDP02334.1| unnamed protein product [Coffea canephora] 5.0e-34	-	pfam07714, Pkinase_Tyr, Protein tyrosine kinase. 5.589e-09	sp|Q9FID8|Y5900_ARATH Putative receptor-like protein kinase At5g39000 OS=Arabidopsis thaliana GN=At5g39000 PE=3 SV=1 3.50402e-41	tr|A0A068U2D1|A0A068U2D1_COFCA Uncharacterized protein OS=Coffea canephora GN=GSCOC_T00039695001 PE=3 SV=1 3.8e-34	GO:0004674, protein serine/threonine kinase activity;GO:0005524, ATP binding;GO:0016021, integral component of membrane	-
TRINITY_DN97111_c2_g1	3.75410243333	23.8992961	-2.67042820672	0.00091843927607	0.021142281168299998	down	PLN02687, PLN02687, flavonoid 3'-monooxygenase. 9.12996e-14	KOG0156, KOG0156, KOG0156, Cytochrome P450 CYP2 subfamily [Secondary metabolites biosynthesis, transport and catabolism]. 3.04674e-11	gi|1021040096|gb|KZM97877.1| hypothetical protein DCAR_014761 [Daucus carota subsp. sativus] 2.1e-34	gi|33320160|gb|AF479661.1| Pastinaca sativa cytochrome P450 (CYP76B7) mRNA, CYP76B7-v1 allele, complete cds 1.40143e-77	-	sp|Q8VWZ7|C76B6_CATRO Geraniol 8-hydroxylase OS=Catharanthus roseus GN=CYP76B6 PE=1 SV=1 5.19401e-25	tr|Q71KT6|Q71KT6_PASSA Cytochrome P450 OS=Pastinaca sativa GN=CYP76B7 PE=2 SV=1 1.3e-33	GO:0004497, monooxygenase activity;GO:0005506, iron ion binding;GO:0005789, endoplasmic reticulum membrane;GO:0016021, integral component of membrane;GO:0016099, monoterpenoid biosynthetic process;GO:0016705, oxidoreductase activity, acting on paired donors, with incorporation or reduction of molecular oxygen;GO:0016709, oxidoreductase activity, acting on paired donors, with incorporation or redu…	-
TRINITY_DN88382_c0_g1	6.0474779000000005	1.40347453333	2.10733070626	0.000789228149885	0.0193383224942	up	-	-	gi|1021046545|gb|KZN04325.1| hypothetical protein DCAR_005162 [Daucus carota subsp. sativus] 3.9e-187	gi|1025121580|ref|XM_016607741.1| PREDICTED: Nicotiana tabacum protein STICHEL-like 3 (LOC107786286), transcript variant X2, mRNA 1.49347e-34	-	sp|F4JRP0|STIL3_ARATH Protein STICHEL-like 3 OS=Arabidopsis thaliana GN=At4g18820 PE=3 SV=1 3.17464e-68	tr|F6HMC0|F6HMC0_VITVI Putative uncharacterized protein OS=Vitis vinifera GN=VIT_10s0003g01720 PE=4 SV=1 3.9e-107	GO:0003677, DNA binding;GO:0003887, DNA-directed DNA polymerase activity;GO:0005524, ATP binding;GO:0005663, DNA replication factor C complex;GO:0006261, DNA-dependent DNA replication;GO:0009360, DNA polymerase III complex	-
TRINITY_DN87283_c0_g2	62.524233333299996	15.848733333299998	1.9800479208000001	0.00226712505257	0.0358848147364	up	-	-	-	-	-	-	-	-	-
TRINITY_DN90590_c1_g3	175.928133333	21.884213	3.00702380025	0.00104741127489	0.0227483960225	up	PLN00165, PLN00165, hypothetical protein; Provisional. 4.5498e-19	-	gi|1021043180|gb|KZN00961.1| hypothetical protein DCAR_009715 [Daucus carota subsp. sativus] 1.4e-26	-	pfam12609, DUF3774, Wound-induced protein. This family of proteins is found in eukaryotes. Proteins in this family are typically between 81 and 97 amino acids in length. The proteins in the family are often annotated as wound-induced proteins however there is little accompanying literature to confirm this. 4.12095e-17	-	tr|A0A0J8BAH6|A0A0J8BAH6_BETVU Uncharacterized protein OS=Beta vulgaris subsp. vulgaris GN=BVRB_4g093250 PE=4 SV=1 1.9e-15	-	-
TRINITY_DN85626_c3_g2	6.737447	0.500466066667	3.75085786121	0.0019195468499500002	0.0325811352841	up	cd14066, STKc_IRAK, Catalytic domain of the Serine/Threonine kinases, Interleukin-1 Receptor Associated Kinases and related STKs. STKs catalyze the transfer of the gamma-phosphoryl group from ATP to serine/threonine residues on protein substrates. IRAKs are involved in Toll-like receptor (TLR) and interleukin-1 (IL-1) signalling pathways, and are thus critical in regulating innate immune response…	KOG1187, KOG1187, KOG1187, Serine/threonine protein kinase [Signal transduction mechanisms]. 7.80999e-28	gi|1025173864|ref|XP_016471343.1| PREDICTED: G-type lectin S-receptor-like serine/threonine-protein kinase At4g27290 isoform X2 [Nicotiana tabacum] 4.4e-38	gi|590625429|ref|XM_007025819.1| Theobroma cacao S-locus lectin protein kinase family protein, putative (TCM_030045) mRNA, complete cds 1.58653e-36	pfam00069, Pkinase, Protein kinase domain. 1.08692e-13	sp|O81832|Y4729_ARATH G-type lectin S-receptor-like serine/threonine-protein kinase At4g27290 OS=Arabidopsis thaliana GN=At4g27290 PE=3 SV=4 9.07921e-51	tr|M1BNV5|M1BNV5_SOLTU Serine/threonine-protein kinase OS=Solanum tuberosum GN=PGSC0003DMG400019237 PE=3 SV=1 1.3e-37	GO:0004674, protein serine/threonine kinase activity;GO:0005516, calmodulin binding;GO:0005524, ATP binding;GO:0005886, plasma membrane;GO:0006468, protein phosphorylation;GO:0006952, defense response;GO:0009506, plasmodesma;GO:0016021, integral component of membrane;GO:0030246, carbohydrate binding;GO:0048544, recognition of pollen	-
TRINITY_DN87956_c0_g1	7.455170900000001	0.110060966667	6.08186661462	0.00100001077607	0.0221044415826	up	-	-	-	-	-	-	-	-	-
TRINITY_DN94921_c1_g3	1.84491033333	14.057782333299999	-2.9297464169599996	0.00204694638242	0.0336616445982	down	-	KOG4698, KOG4698, KOG4698, Uncharacterized conserved protein [Function unknown]. 4.76945e-23	gi|1021047618|gb|KZN05398.1| hypothetical protein DCAR_006235 [Daucus carota subsp. sativus] 1.7e-89	-	-	-	tr|A0A061F4L6|A0A061F4L6_THECC Glycosyltransferase family 61 protein OS=Theobroma cacao GN=TCM_030824 PE=4 SV=1 6.6e-62	GO:0016021, integral component of membrane;GO:0016757, transferase activity, transferring glycosyl groups	-
TRINITY_DN97571_c1_g2	5.72918633333	279.796965233	-5.609906244369999	0.000316502736669	0.0112784872962	down	PLN03020, PLN03020, low-temperature-induced protein; Provisional. 2.62642e-26	-	gi|1021037174|gb|KZM94957.1| hypothetical protein DCAR_018199 [Daucus carota subsp. sativus] 1.8e-74	-	-	sp|Q04980|LTI65_ARATH Low-temperature-induced 65 kDa protein OS=Arabidopsis thaliana GN=LTI65 PE=2 SV=2 1.17681e-07	tr|V4S8K6|V4S8K6_9ROSI Uncharacterized protein OS=Citrus clementina GN=CICLE_v10004574mg PE=4 SV=1 2.8e-27	GO:0009409, response to cold;GO:0009414, response to water deprivation;GO:0009651, response to salt stress;GO:0009737, response to abscisic acid;GO:0009738, abscisic acid-activated signaling pathway;GO:0010150, leaf senescence	-
TRINITY_DN92803_c1_g2	1.1505972666700002	7.42759033333	-2.69051129792	0.0027825196230999998	0.0405084257345	down	TIGR00957, Multidrug_resistance-associated_protein_1, multi drug resistance-associated protein (MRP). This model describes multi drug resistance-associated protein (MRP) in eukaryotes. The multidrug resistance-associated protein is an integral membrane protein that causes multidrug resistance when overexpressed in mammalian cells. It belongs to ABC transporter superfamily. The protein topology an…	KOG0054, KOG0054, KOG0054, Multidrug resistance-associated protein/mitoxantrone resistance protein, ABC superfamily [Secondary metabolites biosynthesis, transport and catabolism]. 0.0	gi|1021044104|gb|KZN01885.1| hypothetical protein DCAR_010639 [Daucus carota subsp. sativus] 0.0e+00	gi|1025333752|ref|XM_016656239.1| PREDICTED: Nicotiana tabacum ABC transporter C family member 10-like (LOC107828853), mRNA 0.0	pfam00005, ABC_tran, ABC transporter. ABC transporters for a large family of proteins responsible for translocation of a variety of compounds across biological membranes. ABC transporters are the largest family of proteins in many completely sequenced bacteria. ABC transporters are composed of two copies of this domain and two copies of a transmembrane domain pfam00664. These four domains may bel…	sp|Q9LYS2|AB10C_ARATH ABC transporter C family member 10 OS=Arabidopsis thaliana GN=ABCC10 PE=2 SV=2 0.0	tr|V4S922|V4S922_9ROSI Uncharacterized protein OS=Citrus clementina GN=CICLE_v10004145mg PE=4 SV=1 1.3e-303	GO:0005524, ATP binding;GO:0005774, vacuolar membrane;GO:0008559, xenobiotic transmembrane transporting ATPase activity;GO:0016021, integral component of membrane;GO:0042626, ATPase activity, coupled to transmembrane movement of substances	K05666-ko02010 ABC transporters;ko04976 Bile secretion
TRINITY_DN95400_c2_g2	234.003534667	34.3896906667	2.76648227807	0.00010070673206699999	0.00561511347197	up	smart00101, 14_3_3, 14-3-3 homologues. 14-3-3 homologues mediates signal transduction by binding to phosphoserine-containing proteins. They are involved in growth factor signalling and also interact with MEK kinases. 1.21018e-43	KOG0841, KOG0841, KOG0841, Multifunctional chaperone (14-3-3 family) [Posttranslational modification, protein turnover, chaperones]. 3.95442e-38	gi|976904665|gb|KVH92328.1| 14-3-3 domain-containing protein, partial [Cynara cardunculus var. scolymus] 1.4e-36	gi|326694864|gb|JF708075.1| Hevea brasiliensis 14-3-3 protein 2 mRNA, complete cds 1.12998e-67	pfam00244, 14-3-3, 14-3-3 protein. 4.04884e-34	sp|Q9SP07|1433_LILLO 14-3-3-like protein OS=Lilium longiflorum PE=2 SV=1 4.48056e-46	tr|A0A103XKA2|A0A103XKA2_CYNCS 14-3-3 domain-containing protein (Fragment) OS=Cynara cardunculus var. scolymus GN=Ccrd_005632 PE=3 SV=1 1.0e-36	-	-
TRINITY_DN71135_c0_g4	9.084430000000001	0.0001	16.4711083754	4.33685837178e-05	0.00327568964251	up	-	-	-	-	-	-	-	-	-
TRINITY_DN84256_c1_g1	1.26423846333	17.9001850006	-3.82363397951	0.00017721459409299997	0.00786491020963	down	PLN00128, PLN00128, Succinate dehydrogenase [ubiquinone] flavoprotein subunit. 2.27249e-153	KOG2403, KOG2403, KOG2403, Succinate dehydrogenase, flavoprotein subunit [Energy production and conversion]. 6.35816e-138	gi|1021036242|gb|KZM94025.1| hypothetical protein DCAR_017270 [Daucus carota subsp. sativus] 1.7e-124	gi|778690594|ref|XM_011654834.1| PREDICTED: Cucumis sativus succinate dehydrogenase [ubiquinone] flavoprotein subunit 1, mitochondrial (LOC101211616), mRNA 0.0	pfam00890, FAD_binding_2, FAD binding domain. This family includes members that bind FAD. This family includes the flavoprotein subunits from succinate and fumarate dehydrogenase, aspartate oxidase and the alpha subunit of adenylylsulphate reductase. 1.15502e-28	sp|O82663|SDHA1_ARATH Succinate dehydrogenase [ubiquinone] flavoprotein subunit 1, mitochondrial OS=Arabidopsis thaliana GN=SDH1-1 PE=1 SV=1 1.96187e-154	tr|A0A118JUN2|A0A118JUN2_CYNCS Succinate dehydrogenase [ubiquinone] flavoprotein subunit, mitochondrial OS=Cynara cardunculus var. scolymus GN=Ccrd_005628 PE=3 SV=1 1.5e-122	GO:0000104, succinate dehydrogenase activity;GO:0005524, ATP binding;GO:0005618, cell wall;GO:0005739, mitochondrion;GO:0005743, mitochondrial inner membrane;GO:0005749, mitochondrial respiratory chain complex II, succinate dehydrogenase complex (ubiquinone);GO:0006099, tricarboxylic acid cycle;GO:0006121, mitochondrial electron transport, succinate to ubiquinone;GO:0008177, succinate dehydrogena…	K00234-ko00020 Citrate cycle (TCA cycle);ko00190 Oxidative phosphorylation;ko01200 Carbon metabolism
TRINITY_DN93942_c2_g2	8.41188433333	0.294241666667	4.83735555077	0.00010430735889799999	0.0057322276751000005	up	-	-	-	-	-	-	-	-	-
TRINITY_DN75446_c3_g2	5.07598370071	0.0001	15.631399816199998	0.00239469172162	0.037009752596	up	-	-	-	-	-	-	-	-	-
TRINITY_DN86353_c3_g1	5.160604	0.18547333333299998	4.79825624783	0.00041565033593499997	0.013125619286	up	-	-	-	-	-	-	-	-	-
TRINITY_DN97045_c2_g1	137.570744	29.6740746667	2.21289874918	0.0009430479805689999	0.021351539795699998	up	pfam06547, DUF1117, Protein of unknown function (DUF1117). This family represents the C-terminus of a number of hypothetical plant proteins. 2.3981e-13	KOG4628, KOG4628, KOG4628, Predicted E3 ubiquitin ligase [Posttranslational modification, protein turnover, chaperones]. 2.23812e-07	gi|356538988|ref|XP_003537982.1| PREDICTED: E3 ubiquitin-protein ligase RING1-like [Glycine max] 5.6e-52	-	pfam06547, DUF1117, Protein of unknown function (DUF1117). This family represents the C-terminus of a number of hypothetical plant proteins. 5.72927e-14	sp|Q940T5|RDUF2_ARATH E3 ubiquitin-protein ligase RDUF2 OS=Arabidopsis thaliana GN=DURF2 PE=1 SV=1 9.60329e-42	tr|I1LJZ8|I1LJZ8_SOYBN Uncharacterized protein OS=Glycine max GN=GLYMA_11G137300 PE=4 SV=1 4.2e-52	GO:0000209, protein polyubiquitination;GO:0004842, ubiquitin-protein transferase activity;GO:0005829, cytosol;GO:0008270, zinc ion binding;GO:0009414, response to water deprivation;GO:0009737, response to abscisic acid;GO:0009738, abscisic acid-activated signaling pathway;GO:0010200, response to chitin;GO:0016874, ligase activity;GO:0043161, proteasome-mediated ubiquitin-dependent protein catabol…	-
TRINITY_DN98068_c3_g1	26.7579	4.56915	2.54996718508	0.000270599188724	0.010297743517999999	up	-	-	-	-	-	-	-	-	-
TRINITY_DN84484_c0_g1	0.0330107	12.4465039833	-8.55859112314	2.88082403105e-05	0.00248842668331	down	pfam14372, DUF4413, Domain of unknown function (DUF4413). This domain is part of an RNase-H fold section of longer proteins some of which are transposable elements possibly of the Pong type, since some members are putative Tam3 transposases. 1.45265e-28	KOG1121, KOG1121, KOG1121, Tam3-transposase (Ac family) [Replication, recombination and repair]. 2.30401e-63	gi|719991103|ref|XP_010253168.1| PREDICTED: zinc finger BED domain-containing protein RICESLEEPER 2-like isoform X1 [Nelumbo nucifera] 1.4e-76	-	pfam14372, DUF4413, Domain of unknown function (DUF4413). This domain is part of an RNase-H fold section of longer proteins some of which are transposable elements possibly of the Pong type, since some members are putative Tam3 transposases. 3.4705e-29	sp|Q6AVI0|RSLE2_ORYSJ Zinc finger BED domain-containing protein RICESLEEPER 2 OS=Oryza sativa subsp. japonica GN=Os03g0733400 PE=2 SV=1 4.72425e-56	tr|U5D9E5|U5D9E5_AMBTC Uncharacterized protein OS=Amborella trichopoda GN=AMTR_s00067p00136180 PE=4 SV=1 5.0e-74	GO:0000977, RNA polymerase II regulatory region sequence-specific DNA binding;GO:0003677, DNA binding;GO:0003700, DNA binding transcription factor activity;GO:0005634, nucleus;GO:0006351, transcription, DNA-templated;GO:0006357, regulation of transcription by RNA polymerase II;GO:0009791, post-embryonic development;GO:0046872, metal ion binding	-
TRINITY_DN97228_c1_g2	93.1036377333	24.8585566667	1.9050950043700001	0.00254211258413	0.0382965726384	up	-	-	-	-	-	-	-	-	-
TRINITY_DN81862_c1_g1	1.29281666667	80.10935	-5.953381029990001	6.90185769694e-05	0.00436962934133	down	-	-	-	-	-	-	-	-	-
TRINITY_DN86375_c0_g2	12.042801366700001	0.960202733333	3.64868817425	0.0013120919134700002	0.0260004741987	up	COG1008, NuoM, NADH:ubiquinone oxidoreductase subunit 4 (chain M) [Energy production and conversion]. 1.64077e-15	-	gi|162279932|ref|NP_064080.2| nad4 gene product (mitochondrion) [Beta vulgaris subsp. vulgaris] 1.1e-40	gi|340576|gb|L12246.1|LAUMTNADH Lactuca sativa mitochondrial NADH dehydrogenase subunit 4 (nad4) gene, complete cds 7.49434e-130	-	sp|P93313|NU4M_ARATH NADH-ubiquinone oxidoreductase chain 4 OS=Arabidopsis thaliana GN=ND4 PE=2 SV=2 2.81445e-48	tr|E6ZE37|E6ZE37_BETVM NADH-ubiquinone oxidoreductase chain 4 OS=Beta vulgaris subsp. maritima GN=nad4 PE=3 SV=1 8.3e-41	GO:0005739, mitochondrion;GO:0005743, mitochondrial inner membrane;GO:0008137, NADH dehydrogenase (ubiquinone) activity;GO:0016021, integral component of membrane;GO:0042773, ATP synthesis coupled electron transport;GO:0070469, respiratory chain	K03881-ko00190 Oxidative phosphorylation
TRINITY_DN98183_c1_g1	0.5808273333330001	6.181756	-3.41183545845	0.0008019770478560001	0.0195328170595	down	pfam03547, Mem_trans, Membrane transport protein. This family includes auxin efflux carrier proteins and other transporter proteins from all domains of life. 1.2714e-29	-	gi|1021028014|gb|KZM85801.1| hypothetical protein DCAR_026777 [Daucus carota subsp. sativus] 1.6e-175	gi|697185024|ref|XM_009603238.1| PREDICTED: Nicotiana tomentosiformis auxin efflux carrier component 3-like (LOC104096807), transcript variant X2, mRNA 2.93182e-120	pfam03547, Mem_trans, Membrane transport protein. This family includes auxin efflux carrier proteins and other transporter proteins from all domains of life. 3.03749e-30	sp|Q9S7Z8|PIN3_ARATH Auxin efflux carrier component 3 OS=Arabidopsis thaliana GN=PIN3 PE=1 SV=1 0.0	tr|A0A118JYU5|A0A118JYU5_CYNCS Auxin efflux carrier component OS=Cynara cardunculus var. scolymus GN=Ccrd_000244 PE=3 SV=1 9.3e-160	GO:0005783, endoplasmic reticulum;GO:0005886, plasma membrane;GO:0009416, response to light stimulus;GO:0009606, tropism;GO:0009630, gravitropism;GO:0009734, auxin-activated signaling pathway;GO:0009926, auxin polar transport;GO:0009958, positive gravitropism;GO:0009986, cell surface;GO:0010252, auxin homeostasis;GO:0010315, auxin efflux;GO:0010329, auxin efflux transmembrane transporter activity…	-
TRINITY_DN94850_c2_g2	12.0251763333	0.798793666667	3.9120913449	0.00056466683411	0.015830411542200003	up	-	-	-	-	-	-	-	-	-
TRINITY_DN96246_c1_g4	6.679723533330001	1.18426416667	2.49579746217	0.00032786995597400005	0.011496705202200001	up	PRK03767, PRK03767, NAD(P)H:quinone oxidoreductase; Provisional. 1.25743e-14	KOG3135, KOG3135, KOG3135, 1,4-benzoquinone reductase-like; Trp repressor binding protein-like/protoplast-secreted protein [General function prediction only]. 7.62064e-27	gi|1021049484|gb|KZN07264.1| hypothetical protein DCAR_008101 [Daucus carota subsp. sativus] 6.2e-34	gi|1025250450|ref|XM_016633440.1| PREDICTED: Nicotiana tabacum probable NAD(P)H dehydrogenase (quinone) FQR1-like 1 (LOC107808878), mRNA 4.30313e-50	-	sp|Q6NQE2|FQRL1_ARATH Probable NAD(P)H dehydrogenase (quinone) FQR1-like 1 OS=Arabidopsis thaliana GN=At4g27270 PE=2 SV=1 4.38802e-36	tr|A0A061GH57|A0A061GH57_THECC Quinone reductase family protein OS=Theobroma cacao GN=TCM_030049 PE=3 SV=1 5.2e-33	GO:0003955, NAD(P)H dehydrogenase (quinone) activity;GO:0005886, plasma membrane;GO:0009506, plasmodesma;GO:0010181, FMN binding;GO:0016491, oxidoreductase activity;GO:0045892, negative regulation of transcription, DNA-templated	-
TRINITY_DN80520_c0_g1	0.298517988001	6.01110735191	-4.33174101259	0.0007624111044260001	0.0189892400729	down	PRK08565, PRK08565, DNA-directed RNA polymerase subunit B; Provisional. 2.00531e-134	KOG0214, KOG0214, KOG0214, RNA polymerase II, second largest subunit [Transcription]. 0.0	gi|1021053642|gb|KZN11420.1| hypothetical protein DCAR_004076 [Daucus carota subsp. sativus] 0.0e+00	gi|1009109389|ref|XM_016034474.1| PREDICTED: Ziziphus jujuba DNA-directed RNA polymerase II subunit RPB2 (LOC107424625), mRNA 0.0	pfam04563, RNA_pol_Rpb2_1, RNA polymerase beta subunit. RNA polymerases catalyze the DNA dependent polymerization of RNA. Prokaryotes contain a single RNA polymerase compared to three in eukaryotes (not including mitochondrial. and chloroplast polymerases). This domain forms one of the two distinctive lobes of the Rpb2 structure. This domain is also known as the protrusion domain. The other lobe …	sp|Q42877|RPB2_SOLLC DNA-directed RNA polymerase II subunit RPB2 OS=Solanum lycopersicum GN=RPB2 PE=2 SV=1 0.0	tr|Q1L5B5|Q1L5B5_RHOMC DNA-directed RNA polymerase subunit beta OS=Rhododendron macrophyllum GN=RPB2 PE=2 SV=1 0.0e+00	GO:0003677, DNA binding;GO:0003899, DNA-directed 5'-3' RNA polymerase activity;GO:0005665, DNA-directed RNA polymerase II, core complex;GO:0005829, cytosol;GO:0006351, transcription, DNA-templated;GO:0006366, transcription by RNA polymerase II;GO:0009506, plasmodesma;GO:0032549, ribonucleoside binding;GO:0046872, metal ion binding	K03010-ko03020 RNA polymerase;ko00230 Purine metabolism;ko00240 Pyrimidine metabolism
TRINITY_DN71436_c0_g1	5.50871924199	0.9046143333329999	2.6063421759	0.00048605643561300005	0.014423375006	up	-	-	gi|694311686|ref|XP_009359098.1| PREDICTED: B3 domain-containing protein At5g42700-like [Pyrus x bretschneideri] 1.5e-18	-	-	sp|Q1G3M3|Y3918_ARATH B3 domain-containing protein At3g19184 OS=Arabidopsis thaliana GN=At3g19184 PE=2 SV=1 4.28541e-15	tr|F6HQC1|F6HQC1_VITVI Putative uncharacterized protein OS=Vitis vinifera GN=VIT_03s0063g00620 PE=4 SV=1 1.7e-17	GO:0003677, DNA binding;GO:0005634, nucleus;GO:0006351, transcription, DNA-templated;GO:0006355, regulation of transcription, DNA-templated	-
TRINITY_DN96485_c1_g3	7.437538000000001	52.3812616667	-2.8161537697	0.0016156574892000001	0.0294467630545	down	PLN03146, PLN03146, aspartyl protease family protein; Provisional. 1.68591e-31	KOG1339, KOG1339, KOG1339, Aspartyl protease [Posttranslational modification, protein turnover, chaperones]. 1.32949e-33	gi|1021054121|gb|KZN11899.1| hypothetical protein DCAR_004555 [Daucus carota subsp. sativus] 1.3e-91	-	pfam14543, TAXi_N, Xylanase inhibitor N-terminal. The N- and C-termini of the members of this family are jointly necessary for creating the catalytic pocket necessary for cleaving xylanase. Phytopathogens produce xylanase that destroys plant cells, so its destruction through proteolysis is vital for plant-survival. 1.90111e-10	sp|Q8S9J6|ASPA_ARATH Aspartyl protease family protein At5g10770 OS=Arabidopsis thaliana GN=At5g10770 PE=2 SV=1 6.69165e-88	tr|F6H3K6|F6H3K6_VITVI Putative uncharacterized protein OS=Vitis vinifera GN=VIT_04s0008g07110 PE=3 SV=1 4.3e-79	GO:0004190, aspartic-type endopeptidase activity;GO:0005886, plasma membrane;GO:0006508, proteolysis;GO:0030163, protein catabolic process;GO:0031225, anchored component of membrane	-
TRINITY_DN77935_c0_g4	0.380862	78.0532666667	-7.679046850469999	0.000560446928284	0.0157571838378	down	-	-	-	-	-	-	-	-	-
TRINITY_DN77935_c0_g1	9.160355000000001	526.206429667	-5.84408155699	0.00147916312434	0.028012244626099997	down	-	KOG4744, KOG4744, KOG4744, Uncharacterized conserved protein [Function unknown]. 2.50835e-06	gi|10945667|gb|AAG24641.1|AF308736_1 Lea1P [Daucus carota] 8.0e-41	-	-	sp|P83442|LEAD3_DAUCA Late embryogenesis abundant protein Dc3 OS=Daucus carota PE=2 SV=1 4.87619e-55	tr|Q9FUG0|Q9FUG0_DAUCA Lea1P OS=Daucus carota PE=2 SV=1 6.1e-41	-	-
TRINITY_DN90710_c0_g1	1.48028576667	12.341432333299998	-3.0595622241400005	6.9230111251699996e-06	0.000894031876059	down	PLN03106, TCP2, Protein TCP2; Provisional. 4.10098e-24	-	gi|1021038562|gb|KZM96345.1| hypothetical protein DCAR_019587 [Daucus carota subsp. sativus] 3.2e-66	gi|778697546|ref|XM_004137168.2| PREDICTED: Cucumis sativus transcription factor TCP4 (LOC101206841), partial mRNA 6.33356e-47	pfam03634, TCP, TCP family transcription factor. This is a family of TCP plant transcription factors. TCP proteins were named after the first characterized members (TB1, CYC and PCFs) and they are involved in multiple developmental control pathways. This region contains a DNA binding basic-Helix-Loop-Helix (bHLP) structure. 1.64931e-18	sp|Q8LPR5|TCP4_ARATH Transcription factor TCP4 OS=Arabidopsis thaliana GN=TCP4 PE=1 SV=1 4.82655e-56	tr|A0A103YJX5|A0A103YJX5_CYNCS Transcription factor, TCP OS=Cynara cardunculus var. scolymus GN=Ccrd_011125 PE=4 SV=1 3.9e-56	GO:0003677, DNA binding;GO:0003700, DNA binding transcription factor activity;GO:0005634, nucleus;GO:0006351, transcription, DNA-templated;GO:0006355, regulation of transcription, DNA-templated;GO:0009793, embryo development ending in seed dormancy;GO:0009965, leaf morphogenesis;GO:0030154, cell differentiation;GO:0045962, positive regulation of development, heterochronic;GO:0048366, leaf develop…	-
TRINITY_DN98411_c4_g6	8.63156333333	1.29098466667	2.7411500159099997	0.00393492193399	0.0494617647026	up	-	-	-	-	-	-	-	-	-
TRINITY_DN97006_c1_g2	139.373004233	37.0781315333	1.9103106967299999	0.0018407667687100001	0.0318515415544	up	-	-	gi|1021040936|gb|KZM98717.1| hypothetical protein DCAR_013921 [Daucus carota subsp. sativus] 3.3e-18	-	-	-	tr|A0A0V0HLZ7|A0A0V0HLZ7_SOLCH Protein YIPF OS=Solanum chacoense PE=3 SV=1 2.8e-17	GO:0016021, integral component of membrane	-
TRINITY_DN97141_c3_g1	16.323977	2.30008321333	2.82723462137	0.00021536337128799998	0.008882753385360001	up	-	-	-	-	-	-	-	-	-
TRINITY_DN93391_c0_g2	31.9965266667	4.42448466667	2.85433396912	0.000115314413656	0.00604100949626	up	-	-	-	-	-	-	-	-	-
TRINITY_DN81369_c1_g2	21.2545475185	0.11613966700799999	7.51576693327	1.85427873952e-10	2.2165461799099998e-07	up	cd06472, ACD_ScHsp26_like, Alpha crystallin domain (ACD) found in Saccharomyces cerevisiae (Sc) small heat shock protein (Hsp)26 and similar proteins. sHsps are molecular chaperones that suppress protein aggregation and protect against cell stress, and are generally active as large oligomers consisting of multiple subunits. ScHsp26 is temperature-regulated, it switches from an inactive to a chape…	KOG0710, KOG0710, KOG0710, Molecular chaperone (small heat-shock protein Hsp26/Hsp42) [Posttranslational modification, protein turnover, chaperones]. 7.27549e-18	gi|1021032859|gb|KZM90643.1| hypothetical protein DCAR_021992 [Daucus carota subsp. sativus] 1.1e-26	gi|18352|emb|X53851.1| Carrot gene for a heat shock protein 1.013e-57	pfam00011, HSP20, Hsp20/alpha crystallin family. Not only do small heat-shock-proteins occur in eukaryotes and prokaryotes but they have also now been shown to occur in cyanobacterial phages as well as their bacterial hosts. 6.45966e-12	sp|P27396|HSP11_DAUCA 17.8 kDa class I heat shock protein OS=Daucus carota PE=3 SV=1 5.47766e-31	tr|A0A067LC99|A0A067LC99_JATCU Uncharacterized protein OS=Jatropha curcas GN=JCGZ_01353 PE=3 SV=1 1.4e-24	GO:0005737, cytoplasm	-
TRINITY_DN81369_c1_g1	241.566452067	0.0001	21.2039886813	1.35014155083e-18	1.25287349596e-14	up	-	-	-	gi|922361571|ref|XM_003615077.2| Medicago truncatula 17.6 kDa class I heat shock protein mRNA 7.18682e-15	-	-	-	-	-
TRINITY_DN75914_c0_g2	12.3052986667	0.9444809999999999	3.70361408981	4.026666820219999e-06	0.000627242677796	up	-	-	-	-	-	-	-	-	-
TRINITY_DN92666_c0_g1	8.907229333330001	0.439457333333	4.34118173259	0.0011326251886199998	0.023755871610400003	up	-	-	-	-	-	-	-	-	-
TRINITY_DN90488_c0_g2	6.06061248	1.59167100472	1.92892143407	0.00143065938024	0.0274052908764	up	-	-	gi|1021046057|gb|KZN03838.1| hypothetical protein DCAR_012594 [Daucus carota subsp. sativus] 5.1e-08	-	-	-	-	-	-
TRINITY_DN97654_c0_g1	0.0001	10.6941667667	-16.706464554100002	1.71533787131e-06	0.00033161667293700003	down	-	-	-	-	-	-	-	-	-
TRINITY_DN78181_c1_g1	542.367966667	55.1335933333	3.29826843525	2.63104518407e-05	0.00234116167153	up	pfam07014, Hs1pro-1_C, Hs1pro-1 protein C-terminus. This family represents the C-terminus (approximately 270 residues) of a number of plant Hs1pro-1 proteins, which are believed to confer nematode resistance. 6.13024e-42	-	gi|1021045260|gb|KZN03041.1| hypothetical protein DCAR_011797 [Daucus carota subsp. sativus] 1.6e-51	-	pfam07014, Hs1pro-1_C, Hs1pro-1 protein C-terminus. This family represents the C-terminus (approximately 270 residues) of a number of plant Hs1pro-1 proteins, which are believed to confer nematode resistance. 1.46457e-42	sp|O04203|HSPR2_ARATH Nematode resistance protein-like HSPRO2 OS=Arabidopsis thaliana GN=HSPRO2 PE=1 SV=1 1.22134e-32	tr|J9QGS7|J9QGS7_NICAT HSPRO OS=Nicotiana attenuata PE=2 SV=1 1.0e-34	GO:0005737, cytoplasm;GO:0006952, defense response;GO:0006979, response to oxidative stress;GO:0009751, response to salicylic acid;GO:0009816, defense response to bacterium, incompatible interaction	-
TRINITY_DN91240_c0_g4	354.9659337	11.133254066700001	4.99473333952	5.7502787598800005e-09	4.06000931963e-06	up	-	-	-	gi|719977394|ref|XM_010250538.1| PREDICTED: Nelumbo nucifera serine/threonine protein phosphatase 2A 57 kDa regulatory subunit B' theta isoform-like (LOC104591626), transcript variant X2, mRNA 2.31874e-11	-	-	-	-	-
TRINITY_DN74653_c2_g1	451.24659265699995	63.0368189	2.8396494009599995	0.000386559063336	0.012678490415100002	up	pfam10551, MULE, MULE transposase domain. This domain was identified by Babu and colleagues. 7.35575e-11	-	gi|702458112|ref|XP_010027453.1| PREDICTED: uncharacterized protein LOC104417970 [Eucalyptus grandis] 1.0e-127	gi|219816867|gb|FJ147931.1| Daucus carota subsp. sativus clone BAC C125D08 genomic sequence 5.54913e-112	pfam10551, MULE, MULE transposase domain. This domain was identified by Babu and colleagues. 1.75735e-11	-	tr|A0A059D122|A0A059D122_EUCGR Uncharacterized protein OS=Eucalyptus grandis GN=EUGRSUZ_B01037 PE=4 SV=1 5.5e-126	GO:0008270, zinc ion binding	-
TRINITY_DN92529_c1_g5	9.59680666667	1.10237466667	3.1219397901200003	0.000625702983799	0.0168260688882	up	-	-	-	-	-	-	-	-	-
TRINITY_DN75819_c0_g2	43.3195333333	8.94787666667	2.27540042515	0.0026913519401099996	0.0395768739892	up	PLN00156, PLN00156, histone H2AX; Provisional. 1.49484e-55	KOG1756, KOG1756, KOG1756, Histone 2A [Chromatin structure and dynamics]. 3.06292e-43	gi|1021037349|gb|KZM95132.1| hypothetical protein DCAR_018374 [Daucus carota subsp. sativus] 1.6e-44	gi|1028956400|ref|XM_016866168.1| PREDICTED: Gossypium hirsutum histone H2AX-like (LOC107933865), mRNA 1.79055e-55	pfam16211, Histone_H2A_C, C-terminus of histone H2A. 2.79098e-08	sp|P35063|H2AX_PICAB Histone H2AX OS=Picea abies PE=2 SV=1 1.9053e-55	tr|W9SJB7|W9SJB7_9ROSA Histone H2A OS=Morus notabilis GN=L484_020427 PE=3 SV=1 9.0e-43	GO:0000786, nucleosome;GO:0003677, DNA binding;GO:0005634, nucleus	-
TRINITY_DN96610_c2_g3	20.8710233333	0.125060333333	7.382733261519999	6.32949470009e-05	0.00412796171921	up	-	-	-	-	-	-	-	-	-
TRINITY_DN96610_c2_g2	14.4213093333	0.333714	5.43344613299	0.00012831813832200003	0.00638709679	up	-	-	-	-	-	-	-	-	-
TRINITY_DN81597_c1_g5	2.61902666667	45.6942666667	-4.12491050511	0.0011151329888	0.023565860622099997	down	-	-	gi|1021053001|gb|KZN10779.1| hypothetical protein DCAR_003435 [Daucus carota subsp. sativus] 2.4e-09	-	-	-	-	-	-
TRINITY_DN87229_c2_g1	10.76596	0.111843333333	6.588853896080001	0.000302984051764	0.011046901007700002	up	-	-	-	-	-	-	-	-	-
TRINITY_DN71810_c2_g5	3.5972953682999997	30.1143299	-3.0654656297400003	0.0011496494446400001	0.0239428595625	down	-	-	-	-	-	-	-	-	-
TRINITY_DN96411_c0_g4	0.144657262965	8.07705666667	-5.80311899589	0.000126845360127	0.00633475456685	down	PRK08317, PRK08317, hypothetical protein; Provisional. 3.11653e-09	-	gi|1021042338|gb|KZN00119.1| hypothetical protein DCAR_008873 [Daucus carota subsp. sativus] 2.2e-95	gi|971572341|ref|XM_006359455.2| PREDICTED: Solanum tuberosum uncharacterized methyltransferase At2g41040, chloroplastic-like (LOC102586534), mRNA 1.02786e-116	pfam08241, Methyltransf_11, Methyltransferase domain. Members of this family are SAM dependent methyltransferases. 8.86189e-08	sp|Q0WPT7|Y2104_ARATH Uncharacterized methyltransferase At2g41040, chloroplastic OS=Arabidopsis thaliana GN=At2g41040 PE=2 SV=1 1.35798e-97	tr|A0A068UQA4|A0A068UQA4_COFCA Uncharacterized protein OS=Coffea canephora GN=GSCOC_T00031249001 PE=4 SV=1 6.4e-87	GO:0005737, cytoplasm;GO:0008168, methyltransferase activity;GO:0008757, S-adenosylmethionine-dependent methyltransferase activity;GO:0009507, chloroplast;GO:0010287, plastoglobule;GO:0032259, methylation;GO:0080167, response to karrikin	-
TRINITY_DN96411_c0_g3	0.103581666667	6.80789666667	-6.03836855694	0.00299317615414	0.04237745062	down	-	-	-	-	-	-	-	-	-
TRINITY_DN84334_c0_g5	31.470601666700002	7.636185666669999	2.0430806748299997	0.00152293729857	0.028490579782599997	up	-	-	-	-	-	-	-	-	-
TRINITY_DN74643_c5_g1	0.8074180000000001	12.9691523372	-4.00562462842	0.00098485769359	0.0219162045915	down	pfam04832, SOUL, SOUL heme-binding protein. This family represents a group of putative heme-binding proteins. Our family includes archaeal and bacterial homologues. 2.58543e-11	-	gi|1021043861|gb|KZN01642.1| hypothetical protein DCAR_010396 [Daucus carota subsp. sativus] 2.2e-57	-	pfam04832, SOUL, SOUL heme-binding protein. This family represents a group of putative heme-binding proteins. Our family includes archaeal and bacterial homologues. 6.17681e-12	sp|Q9SR77|HBPL1_ARATH Heme-binding-like protein At3g10130, chloroplastic OS=Arabidopsis thaliana GN=At3g10130 PE=2 SV=1 1.59341e-06	tr|M1DPQ2|M1DPQ2_SOLTU Uncharacterized protein OS=Solanum tuberosum GN=PGSC0003DMG400041963 PE=4 SV=1 8.7e-54	GO:0009507, chloroplast;GO:0009535, chloroplast thylakoid membrane;GO:0010287, plastoglobule	-
TRINITY_DN84589_c1_g6	7.255833333330001	0.0001	16.1468536971	4.99713800613e-05	0.00354765350005	up	-	-	-	-	-	-	-	-	-
TRINITY_DN69530_c0_g1	0.838505	6.589657633330001	-2.9743122200300003	0.00304106276977	0.0427411016501	down	cd05506, Bromo_plant1, Bromodomain, uncharacterized subfamily specific to plants. Might function as a global transcription factor. Bromodomains are 110 amino acid long domains, that are found in many chromatin associated proteins. Bromodomains can interact specifically with acetylated lysine. 4.18298e-30	KOG1474, KOG1474, KOG1474, Transcription initiation factor TFIID, subunit BDF1 and related bromodomain proteins [Transcription]. 7.45675e-26	gi|1021053520|gb|KZN11298.1| hypothetical protein DCAR_003954 [Daucus carota subsp. sativus] 2.3e-58	-	pfam00439, Bromodomain, Bromodomain. Bromodomains are 110 amino acid long domains, that are found in many chromatin associated proteins. Bromodomains can interact specifically with acetylated lysine. 7.88865e-22	sp|Q9LS28|GTE12_ARATH Transcription factor GTE12 OS=Arabidopsis thaliana GN=GTE12 PE=2 SV=2 2.32126e-27	tr|A0A022QKP4|A0A022QKP4_ERYGU Uncharacterized protein OS=Erythranthe guttata GN=MIMGU_mgv1a003834mg PE=4 SV=1 8.9e-34	GO:0005634, nucleus;GO:0006351, transcription, DNA-templated;GO:0006355, regulation of transcription, DNA-templated	-
TRINITY_DN96727_c2_g3	571.11184	69.3238693333	3.0423492077900005	0.0030700011611999997	0.042987295845599995	up	-	-	-	-	-	-	-	-	-
TRINITY_DN92185_c2_g3	45.9933	7.44216	2.6276304015900003	5.20955261247e-05	0.0036308681228400005	up	-	KOG1100, KOG1100, KOG1100, Predicted E3 ubiquitin ligase [Posttranslational modification, protein turnover, chaperones]. 6.14568e-27	gi|1021048458|gb|KZN06238.1| hypothetical protein DCAR_007075 [Daucus carota subsp. sativus] 5.2e-71	-	-	sp|Q9LDD1|BRG3_ARATH Probable BOI-related E3 ubiquitin-protein ligase 3 OS=Arabidopsis thaliana GN=BRG3 PE=1 SV=1 9.3937e-16	tr|A0A067H3S8|A0A067H3S8_CITSI Uncharacterized protein OS=Citrus sinensis GN=CISIN_1g019869mg PE=4 SV=1 4.0e-47	GO:0004842, ubiquitin-protein transferase activity;GO:0005634, nucleus;GO:0006952, defense response;GO:0008270, zinc ion binding;GO:0016874, ligase activity;GO:0031347, regulation of defense response;GO:0043067, regulation of programmed cell death;GO:0043161, proteasome-mediated ubiquitin-dependent protein catabolic process	-
TRINITY_DN77906_c3_g1	18.508141666700002	0.641922333333	4.84961748149	0.000509015232985	0.0148073241179	up	-	-	-	-	-	-	-	-	-
TRINITY_DN76169_c1_g7	13.5912003333	0.0001	17.0523133506	0.00040527393900800004	0.012979823009500001	up	-	-	-	-	-	-	-	-	-
TRINITY_DN86046_c1_g1	6.540373333330001	0.0001	15.997085368599999	0.000390326614499	0.0127601640151	up	-	-	-	-	-	-	-	-	-
TRINITY_DN71375_c2_g1	6.343999999999999	0.12920299999999998	5.617681297180001	0.000493739983857	0.0145450649122	up	-	-	-	-	-	-	-	-	-
TRINITY_DN68139_c0_g1	0.1315066	5.889387999999999	-5.48491061131	2.82545963827e-05	0.0024635353251399998	down	-	-	gi|1021053706|gb|KZN11484.1| hypothetical protein DCAR_004140 [Daucus carota subsp. sativus] 1.8e-81	-	-	sp|Q570C0|TIR1_ARATH Protein TRANSPORT INHIBITOR RESPONSE 1 OS=Arabidopsis thaliana GN=TIR1 PE=1 SV=2 2.22938e-61	tr|A5C819|A5C819_VITVI Putative uncharacterized protein OS=Vitis vinifera GN=VITISV_016565 PE=4 SV=1 4.5e-72	GO:0000822, inositol hexakisphosphate binding;GO:0004842, ubiquitin-protein transferase activity;GO:0005634, nucleus;GO:0006952, defense response;GO:0007049, cell cycle;GO:0009733, response to auxin;GO:0009734, auxin-activated signaling pathway;GO:0009873, ethylene-activated signaling pathway;GO:0010011, auxin binding;GO:0010152, pollen maturation;GO:0010311, lateral root formation;GO:0016021, in…	K14485-ko04075 Plant hormone signal transduction
TRINITY_DN89248_c0_g1	140.609187333	9.776670333330001	3.8462038459	0.0005637248399930001	0.0158206594069	up	-	-	-	-	-	-	-	-	-
TRINITY_DN98320_c3_g2	58.2453424	13.0477808967	2.15833822791	0.000582925452742	0.0161244434158	up	pfam03091, CutA1, CutA1 divalent ion tolerance protein. Several gene loci with a possible involvement in cellular tolerance to copper have been identified. One such locus in eubacteria and archaebacteria, cutA, is thought to be involved in cellular tolerance to a wide variety of divalent cations other than copper. The cutA locus consists of two operons, of one and two genes. The CutA1 protein is …	KOG3338, KOG3338, KOG3338, Divalent cation tolerance-related protein [Inorganic ion transport and metabolism]. 7.54983e-19	gi|1021041994|gb|KZM99775.1| hypothetical protein DCAR_012863 [Daucus carota subsp. sativus] 2.6e-31	-	pfam03091, CutA1, CutA1 divalent ion tolerance protein. Several gene loci with a possible involvement in cellular tolerance to copper have been identified. One such locus in eubacteria and archaebacteria, cutA, is thought to be involved in cellular tolerance to a wide variety of divalent cations other than copper. The cutA locus consists of two operons, of one and two genes. The CutA1 protein is …	sp|Q109R6|CUTA1_ORYSJ Protein CutA 1, chloroplastic OS=Oryza sativa subsp. japonica GN=CUTA1 PE=1 SV=1 1.19835e-29	tr|A0A0K9RPZ7|A0A0K9RPZ7_SPIOL Uncharacterized protein OS=Spinacia oleracea GN=SOVF_047880 PE=4 SV=1 1.7e-27	GO:0005507, copper ion binding;GO:0009507, chloroplast;GO:0010038, response to metal ion;GO:0070207, protein homotrimerization	-
TRINITY_DN69772_c2_g1	0.0001	6.483551866669999	-15.9844967569	5.95255967831e-05	0.00396574788742	down	-	-	gi|672169806|ref|XP_008804945.1| PREDICTED: putative disease resistance protein RGA3 [Phoenix dactylifera] 8.4e-12	-	-	sp|Q7XA39|RGA4_SOLBU Putative disease resistance protein RGA4 OS=Solanum bulbocastanum GN=RGA4 PE=2 SV=1 6.77963e-08	tr|G7ZWR4|G7ZWR4_MEDTR NBS-LRR resistance-like protein 1O OS=Medicago truncatula GN=MTR_8g010440 PE=3 SV=1 8.4e-12	GO:0005524, ATP binding;GO:0006952, defense response;GO:0043531, ADP binding	-
TRINITY_DN94223_c1_g3	0.0001	6.424034099999999	-15.9711919305	0.00109803961081	0.0234314582784	down	PLN02765, PLN02765, pyruvate kinase. 4.93757e-07	-	gi|1021046482|gb|KZN04262.1| hypothetical protein DCAR_005096 [Daucus carota subsp. sativus] 4.5e-08	-	-	sp|Q2RAK2|KPYC1_ORYSJ Pyruvate kinase 1, cytosolic OS=Oryza sativa subsp. japonica GN=Os11g0148500 PE=1 SV=1 8.05749e-07	-	GO:0000287, magnesium ion binding;GO:0004743, pyruvate kinase activity;GO:0005524, ATP binding;GO:0005829, cytosol;GO:0016301, kinase activity;GO:0030955, potassium ion binding	-
TRINITY_DN94393_c2_g3	189.813666667	30.0427333333	2.65949588826	0.00146289017011	0.027833906496599996	up	-	-	-	-	-	-	-	-	-
TRINITY_DN75746_c1_g1	1.03773533333	11.5777556667	-3.47984516872	0.000108729935526	0.00587096460681	down	pfam13369, Transglut_core2, Transglutaminase-like superfamily. 4.7954e-10	-	gi|1021026550|gb|KZM84337.1| hypothetical protein DCAR_028369 [Daucus carota subsp. sativus] 6.1e-149	gi|719985803|ref|XM_010253204.1| PREDICTED: Nelumbo nucifera uncharacterized LOC104593399 (LOC104593399), transcript variant X1, mRNA 1.14759e-126	pfam13369, Transglut_core2, Transglutaminase-like superfamily. 1.14566e-10	-	tr|A0A061G846|A0A061G846_THECC Uncharacterized protein isoform 1 OS=Theobroma cacao GN=TCM_016681 PE=4 SV=1 7.2e-126	-	-
TRINITY_DN79672_c1_g1	0.8838293666670001	11.9070523333	-3.7519046310500004	0.00313443349523	0.043532904971099996	down	pfam16913, PUNUT, Purine nucleobase transmembrane transport. PUNUT is a family of largely plant and fungal purine transporters. Most members are 10-pass transmembrane proteins, and they belong to the drug/metabolite transporter (dmt) superfamily. The plant vascular system transports nucloebases and their derivatives such as cytokinins and caffeine by a common H+-coupled high-affinity purine trans…	-	gi|1021043041|gb|KZN00822.1| hypothetical protein DCAR_009576 [Daucus carota subsp. sativus] 6.6e-36	gi|596184860|ref|XM_007223264.1| Prunus persica hypothetical protein (PRUPE_ppa007339mg) mRNA, complete cds 7.22223e-26	pfam16913, PUNUT, Purine nucleobase transmembrane transport. PUNUT is a family of largely plant and fungal purine transporters. Most members are 10-pass transmembrane proteins, and they belong to the drug/metabolite transporter (dmt) superfamily. The plant vascular system transports nucloebases and their derivatives such as cytokinins and caffeine by a common H+-coupled high-affinity purine trans…	sp|Q9FZ96|PUP1_ARATH Purine permease 1 OS=Arabidopsis thaliana GN=PUP1 PE=1 SV=1 7.5484e-28	tr|A5CAM1|A5CAM1_VITVI Putative uncharacterized protein OS=Vitis vinifera GN=VIT_18s0001g06950 PE=4 SV=1 3.2e-30	GO:0005215, transporter activity;GO:0005345, purine nucleobase transmembrane transporter activity;GO:0005887, integral component of plasma membrane;GO:0006863, purine nucleobase transport;GO:0010184, cytokinin transport;GO:0015211, purine nucleoside transmembrane transporter activity;GO:0016021, integral component of membrane	-
TRINITY_DN95014_c0_g5	1.01468233333	39.786630333299996	-5.293183678819999	0.000151381670766	0.00711906620541	down	pfam08367, M16C_assoc, Peptidase M16C associated. This domain appears in eukaryotes as well as bacteria and tends to be found near the C-terminus of the metalloprotease M16C (pfam05193). 7.05143e-08	KOG2019, KOG2019, KOG2019, Metalloendoprotease HMP1 (insulinase superfamily) [General function prediction only, Posttranslational modification, protein turnover, chaperones]. 3.7503e-17	gi|1021023626|gb|KZM81414.1| hypothetical protein DCAR_029027 [Daucus carota subsp. sativus] 5.7e-37	gi|764562722|ref|XM_004296030.2| PREDICTED: Fragaria vesca subsp. vesca presequence protease 1, chloroplastic/mitochondrial-like (LOC101300524), mRNA 2.16898e-41	pfam08367, M16C_assoc, Peptidase M16C associated. This domain appears in eukaryotes as well as bacteria and tends to be found near the C-terminus of the metalloprotease M16C (pfam05193). 1.68465e-08	sp|Q9LJL3|PREP1_ARATH Presequence protease 1, chloroplastic/mitochondrial OS=Arabidopsis thaliana GN=PREP1 PE=1 SV=2 4.79469e-36	tr|A0A022RD97|A0A022RD97_ERYGU Uncharacterized protein OS=Erythranthe guttata GN=MIMGU_mgv1a000907mg PE=3 SV=1 1.9e-32	GO:0003824, catalytic activity;GO:0004222, metalloendopeptidase activity;GO:0005739, mitochondrion;GO:0005759, mitochondrial matrix;GO:0006508, proteolysis;GO:0008270, zinc ion binding;GO:0009507, chloroplast;GO:0009570, chloroplast stroma;GO:0009941, chloroplast envelope;GO:0016485, protein processing;GO:0046686, response to cadmium ion;GO:0046872, metal ion binding;GO:0048046, apoplast	-
TRINITY_DN81174_c0_g7	2.72352073333	40.4266011333	-3.89176015899	1.01378209426e-05	0.0011801477329200002	down	-	-	-	-	-	-	-	-	-
TRINITY_DN81928_c0_g1	4.13631606667	36.4965283333	-3.1413409016900005	0.000771072616398	0.019058814285900002	down	TIGR02427, b-ketoadipate_enol-lactone_hydrolase, 3-oxoadipate enol-lactonase. Members of this family are 3-oxoadipate enol-lactonase. Note that the substrate is known as 3-oxoadipate enol-lactone, 2-oxo-2,3-dihydrofuran-5-acetate, 4,5-Dihydro-5-oxofuran-2-acetate, and 5-oxo-4,5-dihydrofuran-2-acetate. The enzyme the catalyzes the fourth step in the protocatechuate degradation to beta-ketoadipate …	-	gi|1021043347|gb|KZN01128.1| hypothetical protein DCAR_009882 [Daucus carota subsp. sativus] 7.2e-148	gi|1025309469|ref|XM_016645982.1| PREDICTED: Nicotiana tabacum probable strigolactone esterase DAD2 (LOC107819832), mRNA 5.66696e-102	pfam00561, Abhydrolase_1, alpha/beta hydrolase fold. This catalytic domain is found in a very wide range of enzymes. 5.17423e-08	sp|J9U5U9|DAD2_PETHY Probable strigolactone esterase DAD2 OS=Petunia hybrida GN=DAD2 PE=1 SV=1 2.44623e-167	tr|A0A103XWP0|A0A103XWP0_CYNCS Uncharacterized protein OS=Cynara cardunculus var. scolymus GN=Ccrd_023510 PE=4 SV=1 7.2e-132	GO:0010223, secondary shoot formation;GO:0016788, hydrolase activity, acting on ester bonds;GO:1901601, strigolactone biosynthetic process	-
TRINITY_DN82777_c0_g1	7.368543333330001	1.7856513333300001	2.04492903816	0.0026683650011600003	0.039402609996199996	up	-	-	gi|1021034467|gb|KZM92251.1| hypothetical protein DCAR_020384 [Daucus carota subsp. sativus] 3.7e-14	-	-	-	tr|A0A022S231|A0A022S231_ERYGU Uncharacterized protein OS=Erythranthe guttata GN=MIMGU_mgv1a010654mg PE=4 SV=1 1.2e-09	GO:0030001, metal ion transport;GO:0046872, metal ion binding	-
TRINITY_DN84146_c0_g1	3.078521	49.9089516667	-4.01898928549	0.0037094942012800003	0.047913623947599994	down	-	-	gi|1021044735|gb|KZN02516.1| hypothetical protein DCAR_011270 [Daucus carota subsp. sativus] 2.3e-24	-	-	-	tr|F6HUS8|F6HUS8_VITVI Putative uncharacterized protein OS=Vitis vinifera GN=VIT_14s0066g00140 PE=4 SV=1 3.7e-06	GO:0000166, nucleotide binding;GO:0003676, nucleic acid binding	-
TRINITY_DN69141_c0_g1	43.5317978888	2.5245877	4.1079499053	0.000776592584094	0.0191588015515	up	pfam14111, DUF4283, Domain of unknown function (DUF4283). This domain family is found in plants, and is approximately 100 amino acids in length. Considering the very diverse range of other domains it is associated with it is possible that this domain is a binding/guiding region. There are two highly conserved tryptophan residues. 7.37164e-12	-	gi|985473021|ref|XP_015381659.1| PREDICTED: uncharacterized protein LOC107174918 [Citrus sinensis] 4.2e-60	-	pfam14111, DUF4283, Domain of unknown function (DUF4283). This domain family is found in plants, and is approximately 100 amino acids in length. Considering the very diverse range of other domains it is associated with it is possible that this domain is a binding/guiding region. There are two highly conserved tryptophan residues. 1.76115e-12	-	tr|A5C0G0|A5C0G0_VITVI Putative uncharacterized protein OS=Vitis vinifera GN=VITISV_016971 PE=4 SV=1 3.7e-56	-	-
TRINITY_DN82166_c0_g1	7.607625333330001	0.0001	16.215158576500002	0.00159815489715	0.0292508728246	up	-	-	-	-	-	-	-	-	-
TRINITY_DN75004_c0_g2	3.61820333333	23.4943333333	-2.6989674399799997	0.003971449536949999	0.049703921478000006	down	-	-	gi|1021027524|gb|KZM85311.1| hypothetical protein DCAR_027267 [Daucus carota subsp. sativus] 1.6e-27	-	-	sp|Q9ZUG9|BH066_ARATH Transcription factor bHLH66 OS=Arabidopsis thaliana GN=BHLH66 PE=2 SV=1 7.86212e-07	tr|A0A068VJD0|A0A068VJD0_COFCA Uncharacterized protein OS=Coffea canephora GN=GSCOC_T00001286001 PE=4 SV=1 1.5e-22	GO:0001046, core promoter sequence-specific DNA binding;GO:0001228, transcriptional activator activity, RNA polymerase II transcription regulatory region sequence-specific DNA binding;GO:0003700, DNA binding transcription factor activity;GO:0005634, nucleus;GO:0006355, regulation of transcription, DNA-templated;GO:0006366, transcription by RNA polymerase II;GO:0048765, root hair cell differentiat…	-
TRINITY_DN75004_c0_g1	5.2211453	34.136792299999996	-2.70888928704	0.0013269257982400002	0.0261667028162	down	-	-	gi|1021051922|gb|KZN09700.1| hypothetical protein DCAR_002356 [Daucus carota subsp. sativus] 3.9e-33	-	-	-	tr|K4CVU8|K4CVU8_SOLLC Uncharacterized protein OS=Solanum lycopersicum PE=4 SV=1 5.5e-19	GO:0001046, core promoter sequence-specific DNA binding;GO:0001228, transcriptional activator activity, RNA polymerase II transcription regulatory region sequence-specific DNA binding;GO:0005634, nucleus;GO:0006366, transcription by RNA polymerase II	-
TRINITY_DN88531_c0_g2	0.302625	8.612347	-4.83080336895	0.00015564198765000002	0.007262957321669999	down	-	-	-	-	-	-	-	-	-
TRINITY_DN93037_c0_g2	1.5675534	18.5721350333	-3.56655317995	8.26488746754e-05	0.00491182337812	down	PLN03185, PLN03185, phosphatidylinositol phosphate kinase; Provisional. 7.23241e-108	KOG0229, KOG0229, KOG0229, Phosphatidylinositol-4-phosphate 5-kinase [Signal transduction mechanisms]. 3.63155e-79	gi|1021051386|gb|KZN09164.1| hypothetical protein DCAR_001820 [Daucus carota subsp. sativus] 3.4e-140	gi|848900308|ref|XM_012994855.1| PREDICTED: Erythranthe guttatus phosphatidylinositol 4-phosphate 5-kinase 8-like (LOC105970073), mRNA 1.25374e-135	pfam01504, PIP5K, Phosphatidylinositol-4-phosphate 5-Kinase. This family contains a region from the common kinase core found in the type I phosphatidylinositol-4-phosphate 5-kinase (PIP5K) family as described in. The family consists of various type I, II and III PIP5K enzymes. PIP5K catalyzes the formation of phosphoinositol-4,5-bisphosphate via the phosphorylation of phosphatidylinositol-4-phosp…	sp|Q6EX42|PI5K1_ORYSJ Phosphatidylinositol 4-phosphate 5-kinase 1 OS=Oryza sativa subsp. japonica GN=PIPK1 PE=2 SV=2 1.6957e-124	tr|F6H8Z0|F6H8Z0_VITVI Putative uncharacterized protein OS=Vitis vinifera GN=VIT_12s0034g01790 PE=4 SV=1 8.3e-115	GO:0005524, ATP binding;GO:0009908, flower development;GO:0016308, 1-phosphatidylinositol-4-phosphate 5-kinase activity;GO:0030154, cell differentiation	K00889-ko04011 MAPK signaling pathway - yeast;ko04070 Phosphatidylinositol signaling system;ko04072 Phospholipase D signaling pathway;ko04139 Regulation of mitophagy - yeast;ko04810 Regulation of actin cytoskeleton;ko04144 Endocytosis;ko00562 Inositol phosphate metabolism;ko04666 Fc gamma R-mediated phagocytosis
TRINITY_DN82008_c0_g1	62.6464466667	0.7410836666670001	6.40145244263	0.00024273698360499998	0.009561835199540002	up	-	-	-	-	-	-	-	-	-
TRINITY_DN97339_c1_g2	0.909967666667	9.858830000000001	-3.43752925552	0.00238617188367	0.036939601298300005	down	-	-	gi|1021045589|gb|KZN03370.1| hypothetical protein DCAR_012126 [Daucus carota subsp. sativus] 1.6e-174	-	-	sp|P0C7P8|LHWL1_ARATH Transcription factor EMB1444 OS=Arabidopsis thaliana GN=EMB1444 PE=2 SV=1 5.04186e-18	tr|D7THI8|D7THI8_VITVI Putative uncharacterized protein OS=Vitis vinifera GN=VIT_08s0007g00940 PE=4 SV=1 1.4e-42	GO:0003677, DNA binding;GO:0004674, protein serine/threonine kinase activity;GO:0005634, nucleus;GO:0005829, cytosol;GO:0006351, transcription, DNA-templated;GO:0006355, regulation of transcription, DNA-templated;GO:0006468, protein phosphorylation;GO:0035556, intracellular signal transduction;GO:0048364, root development	-
TRINITY_DN79638_c0_g2	29.2657333333	4.130429	2.8248488922000003	0.00157113632564	0.0289521424977	up	-	-	-	-	-	-	-	-	-
TRINITY_DN95261_c0_g4	160.82935366700002	10.278048333300001	3.96789249634	0.0005467089517000001	0.0155264042864	up	cd02176, GH16_XET, Xyloglucan endotransglycosylase, member of glycosyl hydrolase family 16. Xyloglucan endotransglycosylases (XETs) cleave and religate xyloglucan polymers in plant cell walls via a transglycosylation mechanism. Xyloglucan is a soluble hemicellulose with a backbone of beta-1,4-linked glucose units, partially substituted with alpha-1,6-linked xylopyranose branches. It binds noncova…	-	gi|1021028246|gb|KZM86033.1| hypothetical protein DCAR_026545 [Daucus carota subsp. sativus] 2.6e-21	gi|76786473|gb|DQ204724.1| Apium graveolens xyloglucan endotransglycosylase hydrolase (XTH1) mRNA, complete cds 2.84043e-50	pfam00722, Glyco_hydro_16, Glycosyl hydrolases family 16. 2.50471e-11	sp|Q8LDS2|XTH27_ARATH Probable xyloglucan endotransglucosylase/hydrolase protein 27 OS=Arabidopsis thaliana GN=XTH27 PE=2 SV=2 2.49165e-26	tr|Q3HNW2|Q3HNW2_APIGR Xyloglucan endotransglucosylase/hydrolase OS=Apium graveolens GN=XTH1 PE=2 SV=1 2.0e-21	GO:0004553, hydrolase activity, hydrolyzing O-glycosyl compounds;GO:0005618, cell wall;GO:0010087, phloem or xylem histogenesis;GO:0010411, xyloglucan metabolic process;GO:0016762, xyloglucan:xyloglucosyl transferase activity;GO:0042546, cell wall biogenesis;GO:0048046, apoplast;GO:0071555, cell wall organization	-
TRINITY_DN95261_c0_g1	54.122780528999996	1.8730293968599998	4.8527905112	9.094891814270001e-07	0.00021719738513999997	up	-	-	-	-	-	-	-	-	-
TRINITY_DN95261_c0_g2	47.2610686667	9.04785733333	2.38500416569	0.00120404773524	0.024641250389999998	up	cd02176, GH16_XET, Xyloglucan endotransglycosylase, member of glycosyl hydrolase family 16. Xyloglucan endotransglycosylases (XETs) cleave and religate xyloglucan polymers in plant cell walls via a transglycosylation mechanism. Xyloglucan is a soluble hemicellulose with a backbone of beta-1,4-linked glucose units, partially substituted with alpha-1,6-linked xylopyranose branches. It binds noncova…	-	gi|1021028246|gb|KZM86033.1| hypothetical protein DCAR_026545 [Daucus carota subsp. sativus] 4.6e-18	-	pfam00722, Glyco_hydro_16, Glycosyl hydrolases family 16. 1.00622e-06	sp|Q38908|XTH30_ARATH Probable xyloglucan endotransglucosylase/hydrolase protein 30 OS=Arabidopsis thaliana GN=XTH30 PE=2 SV=2 9.71188e-19	tr|Q3HNW2|Q3HNW2_APIGR Xyloglucan endotransglucosylase/hydrolase OS=Apium graveolens GN=XTH1 PE=2 SV=1 3.5e-18	GO:0004553, hydrolase activity, hydrolyzing O-glycosyl compounds;GO:0005618, cell wall;GO:0010411, xyloglucan metabolic process;GO:0016762, xyloglucan:xyloglucosyl transferase activity;GO:0042546, cell wall biogenesis;GO:0048046, apoplast;GO:0071555, cell wall organization	-
TRINITY_DN69623_c0_g2	849.431876667	85.224401	3.31715979025	3.3983552408e-07	9.85477506145e-05	up	-	KOG4585, KOG4585, KOG4585, Predicted transposase [Replication, recombination and repair]. 1.53971e-09	gi|697189396|ref|XP_009603754.1| PREDICTED: uncharacterized protein LOC104098663 [Nicotiana tomentosiformis] 3.5e-38	gi|1025392600|ref|XM_016580103.1| PREDICTED: Nicotiana tabacum uncharacterized LOC107761818 (LOC107761818), mRNA 2.60838e-53	-	-	tr|M1AQ80|M1AQ80_SOLTU Uncharacterized protein OS=Solanum tuberosum GN=PGSC0003DMG400010713 PE=4 SV=1 6.5e-37	-	-
TRINITY_DN77288_c0_g3	48.9061133333	6.13568566667	2.9947183352999995	0.00022014512317099997	0.00901637248791	up	-	-	-	-	-	-	-	-	-
TRINITY_DN93155_c1_g2	41.8225136667	302.535800767	-2.8547541945	0.0038284725308600004	0.0487333118141	down	PLN02284, PLN02284, glutamine synthetase. 2.58788e-56	KOG0683, KOG0683, KOG0683, Glutamine synthetase [Amino acid transport and metabolism]. 2.52688e-31	gi|1021052991|gb|KZN10769.1| hypothetical protein DCAR_003425 [Daucus carota subsp. sativus] 1.2e-53	gi|2454628|gb|AF019559.1|AF019559 Daucus carota clone CGS102 cytosolic glutamine synthetase (GS1) mRNA, complete cds 1.32858e-123	-	sp|O22504|GLNA1_DAUCA Glutamine synthetase cytosolic isozyme OS=Daucus carota GN=GLN1 PE=2 SV=1 8.64593e-64	tr|F6GSQ2|F6GSQ2_VITVI Glutamine synthetase OS=Vitis vinifera GN=VIT_17s0000g01910 PE=3 SV=1 1.5e-48	GO:0004356, glutamate-ammonia ligase activity;GO:0005524, ATP binding;GO:0005737, cytoplasm;GO:0006542, glutamine biosynthetic process	-
TRINITY_DN76445_c1_g4	0.810402033333	7.07786766667	-3.12660508922	0.000343892371422	0.011804328943700001	down	pfam06972, DUF1296, Protein of unknown function (DUF1296). This family represents a conserved region approximately 60 residues long within a number of plant proteins of unknown function. Structural modelling suggests this domain may bind nucleic acids. 2.81206e-21	-	gi|703066338|ref|XP_010087685.1| hypothetical protein L484_013447 [Morus notabilis] 4.0e-37	gi|764609557|ref|XM_011469113.1| PREDICTED: Fragaria vesca subsp. vesca uncharacterized LOC101293990 (LOC101293990), transcript variant X2, mRNA 1.00576e-37	pfam06972, DUF1296, Protein of unknown function (DUF1296). This family represents a conserved region approximately 60 residues long within a number of plant proteins of unknown function. Structural modelling suggests this domain may bind nucleic acids. 6.71825e-22	sp|Q8VZS6|GIP1_ARATH GBF-interacting protein 1 OS=Arabidopsis thaliana GN=GIP1 PE=1 SV=1 9.29706e-09	tr|W9QL32|W9QL32_9ROSA Uncharacterized protein OS=Morus notabilis GN=L484_013447 PE=4 SV=1 3.0e-37	GO:0005634, nucleus;GO:0043388, positive regulation of DNA binding;GO:0051082, unfolded protein binding	-
TRINITY_DN71458_c2_g1	0.0377297333333	7.0428705666699996	-7.544317855519999	0.000810931432661	0.0196718399908	down	-	-	-	-	-	-	-	-	-
TRINITY_DN95868_c1_g2	167.617833333	22.57635	2.89229148523	0.0011220965757399999	0.0236342597202	up	-	-	-	-	-	-	-	-	-
TRINITY_DN98864_c5_g1	19.1742729333	1.79031485066	3.4208866413999997	0.00026742036203400004	0.0102301675245	up	MTH00119, CYTB, cytochrome b; Provisional. 9.33335e-114	KOG4663, KOG4663, KOG4663, Cytochrome b [Energy production and conversion]. 1.51348e-69	gi|15809221|gb|AAK00503.1| cytochrome b [Daucus carota] 1.7e-167	gi|374081932|gb|JQ248574.1| Daucus carota subsp. sativus mitochondrion, complete genome 0.0	pfam00032, Cytochrom_B_C, Cytochrome b(C-terminal)/b6/petD. 9.55815e-28	sp|Q94S37|CYB_DAUCA Cytochrome b OS=Daucus carota GN=MT-CYB PE=3 SV=1 0.0	tr|Q94S28|Q94S28_DAUCA Cytochrome b OS=Daucus carota GN=cob PE=3 SV=1 1.3e-167	GO:0005743, mitochondrial inner membrane;GO:0006122, mitochondrial electron transport, ubiquinol to cytochrome c;GO:0008121, ubiquinol-cytochrome-c reductase activity;GO:0009055, electron transfer activity;GO:0045275, respiratory chain complex III;GO:0046872, metal ion binding	K00412-ko04260 Cardiac muscle contraction;ko02020 Two-component system;ko00190 Oxidative phosphorylation
TRINITY_DN89280_c3_g2	0.39038	21.2544	-5.76673858039	0.0009921249480499999	0.022010061560999997	down	-	-	-	-	-	-	-	-	-
TRINITY_DN96748_c1_g4	11.0796433333	103.4977	-3.22361536227	0.000558211947449	0.015717283688999998	down	-	KOG1336, KOG1336, KOG1336, Monodehydroascorbate/ferredoxin reductase [General function prediction only]. 1.83323e-13	gi|1021034081|gb|KZM91865.1| hypothetical protein DCAR_020770 [Daucus carota subsp. sativus] 1.6e-34	gi|1025086539|ref|XM_016600417.1| PREDICTED: Nicotiana tabacum monodehydroascorbate reductase (LOC107779915), mRNA 3.38226e-58	-	sp|Q43497|MDAR_SOLLC Monodehydroascorbate reductase OS=Solanum lycopersicum GN=AFRR PE=1 SV=1 9.64625e-37	tr|D2CGM8|D2CGM8_IPOBA Monodehydroascorbate reductase OS=Ipomoea batatas PE=2 SV=1 6.7e-30	GO:0005737, cytoplasm;GO:0016491, oxidoreductase activity;GO:0016656, monodehydroascorbate reductase (NADH) activity;GO:0045454, cell redox homeostasis;GO:0050660, flavin adenine dinucleotide binding	-
TRINITY_DN90061_c0_g3	4.67506712667	46.0725040333	-3.3008470252099995	1.02773608707e-05	0.00119211880371	down	PLN03202, PLN03202, protein argonaute; Provisional. 3.8218e-31	KOG1041, KOG1041, KOG1041, Translation initiation factor 2C (eIF-2C) and related proteins [Translation, ribosomal structure and biogenesis]. 2.979e-33	gi|976923558|gb|KVI07875.1| Argonaute/Dicer protein, PAZ [Cynara cardunculus var. scolymus] 1.5e-134	gi|731351836|ref|XM_010688934.1| PREDICTED: Beta vulgaris subsp. vulgaris protein argonaute 1 (LOC104901366), transcript variant X2, mRNA 3.70238e-52	pfam16486, ArgoN, N-terminal domain of argonaute. ArgoN is the N-terminal domain of argonaute proteins in eukaryotes. ArgoN is composed of an antiparallel four-stranded beta sheet core that has two alpha helices positioned along one face of the sheet and an extended beta strand towards its N-terminus. The core fold of the N domain most closely resembles the catalytic domain of replication-initiat…	sp|Q6EU14|AGO1A_ORYSJ Protein argonaute 1A OS=Oryza sativa subsp. japonica GN=AGO1A PE=2 SV=1 1.41413e-136	tr|A0A118K4Q3|A0A118K4Q3_CYNCS Argonaute/Dicer protein, PAZ OS=Cynara cardunculus var. scolymus GN=Ccrd_013760 PE=3 SV=1 1.2e-134	GO:0003676, nucleic acid binding;GO:0031047, gene silencing by RNA	-
TRINITY_DN95661_c0_g2	11.2838952963	1.2442731666700002	3.1808900308899997	0.00021796167630900004	0.008949517451350001	up	PLN02418, PLN02418, delta-1-pyrroline-5-carboxylate synthase. 7.37789e-21	KOG4165, KOG4165, KOG4165, Gamma-glutamyl phosphate reductase [Amino acid transport and metabolism]. 2.61873e-16	gi|703144881|ref|XP_010108393.1| Delta-1-pyrroline-5-carboxylate synthase [Morus notabilis] 4.8e-19	gi|147818976|emb|AM434968.2| Vitis vinifera contig VV78X229030.8, whole genome shotgun sequence 6.56535e-25	-	sp|Q96480|P5CS_SOLLC Delta-1-pyrroline-5-carboxylate synthase OS=Solanum lycopersicum GN=PRO2 PE=2 SV=1 7.06459e-18	tr|W9RZG1|W9RZG1_9ROSA Delta-1-pyrroline-5-carboxylate synthase OS=Morus notabilis GN=L484_010401 PE=3 SV=1 3.7e-19	GO:0004349, glutamate 5-kinase activity;GO:0004350, glutamate-5-semialdehyde dehydrogenase activity;GO:0005524, ATP binding;GO:0005737, cytoplasm;GO:0006561, proline biosynthetic process;GO:0055129, L-proline biosynthetic process	-
TRINITY_DN98400_c4_g1	0.0001	13.16937	-17.0068268056	6.962158885110001e-06	0.00089552664297	down	-	-	-	-	-	-	-	-	-
TRINITY_DN85383_c2_g6	14.6700733333	1.36087166667	3.43027315393	0.00380489864286	0.048537863539800004	up	-	-	-	-	-	-	-	-	-
TRINITY_DN92752_c1_g2	9.24182586667	0.927681666667	3.3164761711199997	0.0029311288810700002	0.041827183376099995	up	-	KOG0647, KOG0647, KOG0647, mRNA export protein (contains WD40 repeats) [RNA processing and modification]. 2.66038e-09	-	-	-	sp|Q38942|RAE1_ARATH Protein RAE1 OS=Arabidopsis thaliana GN=RAE1 PE=1 SV=2 4.79584e-11	-	GO:0000972, transcription-dependent tethering of RNA polymerase II gene DNA at nuclear periphery;GO:0003723, RNA binding;GO:0005635, nuclear envelope;GO:0005643, nuclear pore;GO:0005829, cytosol;GO:0006405, RNA export from nucleus;GO:0006606, protein import into nucleus;GO:0043130, ubiquitin binding;GO:0051028, mRNA transport;GO:0080008, Cul4-RING E3 ubiquitin ligase complex	-
TRINITY_DN84762_c0_g2	73.44549	19.881970000000003	1.8852131901900002	0.00156646567387	0.028907076925499996	up	-	-	-	-	-	-	-	-	-
TRINITY_DN93399_c1_g1	0.2394281	10.2079356667	-5.41395485051	0.00233501802135	0.036510599148699995	down	cd07858, STKc_TEY_MAPK, Catalytic domain of the Serine/Threonine Kinases, Plant TEY Mitogen-Activated Protein Kinases. STKs catalyze the transfer of the gamma-phosphoryl group from ATP to serine/threonine residues on protein substrates. Plant MAPKs are typed based on the conserved phosphorylation motif present in the activation loop, TEY and TDY. This subfamily represents the TEY subtype of plant…	KOG0660, KOG0660, KOG0660, Mitogen-activated protein kinase [Signal transduction mechanisms]. 7.69803e-12	gi|25052804|gb|AAN65180.1| mitogen-activated protein kinase 4 [Petroselinum crispum] 7.3e-16	gi|25052803|gb|AY173414.1| Petroselinum crispum mitogen-activated protein kinase 4 (MPK4) mRNA, complete cds 2.40299e-45	-	sp|Q39024|MPK4_ARATH Mitogen-activated protein kinase 4 OS=Arabidopsis thaliana GN=MPK4 PE=1 SV=2 1.67212e-15	tr|Q84XZ6|Q84XZ6_PETCR Mitogen-activated protein kinase OS=Petroselinum crispum GN=MPK4 PE=2 SV=1 5.5e-16	GO:0000911, cytokinesis by cell plate formation;GO:0004672, protein kinase activity;GO:0004707, MAP kinase activity;GO:0005524, ATP binding;GO:0005622, intracellular;GO:0005634, nucleus;GO:0005737, cytoplasm;GO:0005829, cytosol;GO:0005874, microtubule;GO:0006468, protein phosphorylation;GO:0006972, hyperosmotic response;GO:0007112, male meiosis cytokinesis;GO:0009409, response to cold;GO:0009504,…	-
TRINITY_DN76409_c1_g3	81.0004516333	2.11996666667	5.2558164662	1.12761704268e-06	0.000257910634653	up	pfam03081, Exo70, Exo70 exocyst complex subunit. The Exo70 protein forms one subunit of the exocyst complex. First discovered in S. cerevisiae, Exo70 and other exocyst proteins have been observed in several other eukaryotes, including humans. In S. cerevisiae, the exocyst complex is involved in the late stages of exocytosis, and is localized at the tip of the bud, the major site of exocytosis in …	KOG2344, KOG2344, KOG2344, Exocyst component protein and related proteins [Intracellular trafficking, secretion, and vesicular transport]. 1.37848e-138	gi|1021047394|gb|KZN05174.1| hypothetical protein DCAR_006011 [Daucus carota subsp. sativus] 4.4e-253	-	pfam03081, Exo70, Exo70 exocyst complex subunit. The Exo70 protein forms one subunit of the exocyst complex. First discovered in S. cerevisiae, Exo70 and other exocyst proteins have been observed in several other eukaryotes, including humans. In S. cerevisiae, the exocyst complex is involved in the late stages of exocytosis, and is localized at the tip of the bud, the major site of exocytosis in …	sp|Q9LZD3|E70A1_ARATH Exocyst complex component EXO70A1 OS=Arabidopsis thaliana GN=EXO70A1 PE=1 SV=1 9.9173e-81	tr|A5AIG4|A5AIG4_VITVI Putative uncharacterized protein OS=Vitis vinifera GN=VITISV_037767 PE=4 SV=1 2.1e-167	GO:0000145, exocyst;GO:0005576, extracellular region;GO:0005618, cell wall;GO:0005829, cytosol;GO:0005856, cytoskeleton;GO:0005886, plasma membrane;GO:0006887, exocytosis;GO:0009524, phragmoplast	K07195-ko04910 Insulin signaling pathway
TRINITY_DN94494_c0_g1	2.77391633333	27.848333333299998	-3.3275948087900002	0.0009731848110689998	0.0217234246641	down	PLN02526, PLN02526, acyl-coenzyme A oxidase. 1.09907e-61	KOG0138, KOG0138, KOG0138, Glutaryl-CoA dehydrogenase [Amino acid transport and metabolism]. 2.60726e-12	gi|1021039457|gb|KZM97238.1| hypothetical protein DCAR_015400 [Daucus carota subsp. sativus] 2.5e-58	gi|747094386|ref|XM_011096724.1| PREDICTED: Sesamum indicum acyl-coenzyme A oxidase 4, peroxisomal (LOC105174578), mRNA 3.41269e-59	pfam02771, Acyl-CoA_dh_N, Acyl-CoA dehydrogenase, N-terminal domain. The N-terminal domain of Acyl-CoA dehydrogenase is an all-alpha domain. 1.79024e-12	sp|Q96329|ACOX4_ARATH Acyl-coenzyme A oxidase 4, peroxisomal OS=Arabidopsis thaliana GN=ACX4 PE=1 SV=1 5.83393e-62	tr|A0A022RPJ4|A0A022RPJ4_ERYGU Uncharacterized protein OS=Erythranthe guttata GN=MIMGU_mgv1a005306mg PE=3 SV=1 6.7e-51	GO:0000062, fatty-acyl-CoA binding;GO:0003995, acyl-CoA dehydrogenase activity;GO:0003997, acyl-CoA oxidase activity;GO:0005777, peroxisome;GO:0006635, fatty acid beta-oxidation;GO:0009055, electron transfer activity;GO:0009514, glyoxysome;GO:0009793, embryo development ending in seed dormancy;GO:0033539, fatty acid beta-oxidation using acyl-CoA dehydrogenase;GO:0046459, short-chain fatty acid me…	-
TRINITY_DN77344_c3_g1	30.376360666700002	4.108329	2.8863254095	0.0011392176408299998	0.023839373324599997	up	-	-	-	-	-	-	-	-	-
TRINITY_DN85324_c2_g1	19.8121666667	2.24603466667	3.14093456212	0.00040580849405599996	0.012979823009500001	up	-	-	-	-	-	-	-	-	-
TRINITY_DN91841_c2_g3	15.01515	2.80315666667	2.4212946043	0.000553408704055	0.0156294648649	up	pfam00854, PTR2, POT family. The POT (proton-dependent oligopeptide transport) family all appear to be proton dependent transporters. 3.34081e-21	KOG1237, KOG1237, KOG1237, H+/oligopeptide symporter [Amino acid transport and metabolism]. 3.58525e-43	gi|1021046990|gb|KZN04770.1| hypothetical protein DCAR_005607 [Daucus carota subsp. sativus] 8.2e-121	gi|1000965164|ref|XM_002519801.2| PREDICTED: Ricinus communis protein NRT1/ PTR FAMILY 7.3 (LOC8284629), mRNA 2.10056e-125	pfam00854, PTR2, POT family. The POT (proton-dependent oligopeptide transport) family all appear to be proton dependent transporters. 7.98147e-22	sp|Q9LQL2|PTR14_ARATH Protein NRT1/ PTR FAMILY 7.3 OS=Arabidopsis thaliana GN=NPF7.3 PE=1 SV=2 2.63895e-121	tr|U5GQ70|U5GQ70_POPTR Proton-dependent oligopeptide transport family protein OS=Populus trichocarpa GN=POPTR_0003s08710g PE=4 SV=1 6.5e-102	GO:0005215, transporter activity;GO:0005886, plasma membrane;GO:0010150, leaf senescence;GO:0010167, response to nitrate;GO:0015112, nitrate transmembrane transporter activity;GO:0015293, symporter activity;GO:0015706, nitrate transport;GO:0016021, integral component of membrane;GO:0055075, potassium ion homeostasis	-
TRINITY_DN92561_c0_g3	7.028593333330001	0.9341918333329999	2.9114452462700005	0.00089310061106	0.020800694296400003	up	-	-	gi|1021051870|gb|KZN09648.1| hypothetical protein DCAR_002304 [Daucus carota subsp. sativus] 4.2e-18	-	-	-	-	-	-
TRINITY_DN83176_c0_g3	3.28875666667	29.4548593333	-3.1628914901800003	0.00188314567913	0.0322413004426	down	pfam16491, Peptidase_M48_N, CAAX prenyl protease N-terminal, five membrane helices. The five N-terminal five transmembrane alpha-helices of peptidase_M48 family proteins including the CAAX prenyl proteases reside completely within the membrane of the endoplasmic reticulum. 1.5052e-16	KOG2719, KOG2719, KOG2719, Metalloprotease [General function prediction only]. 9.33577e-27	gi|1021030351|gb|KZM88136.1| hypothetical protein DCAR_025211 [Daucus carota subsp. sativus] 1.0e-49	gi|731421660|ref|XM_002277489.2| PREDICTED: Vitis vinifera CAAX prenyl protease 1 homolog (LOC100253429), mRNA 9.47467e-95	pfam16491, Peptidase_M48_N, CAAX prenyl protease N-terminal, five membrane helices. The five N-terminal five transmembrane alpha-helices of peptidase_M48 family proteins including the CAAX prenyl proteases reside completely within the membrane of the endoplasmic reticulum. 3.59606e-17	sp|Q6EPN8|FACE1_ORYSJ CAAX prenyl protease 1 homolog OS=Oryza sativa subsp. japonica GN=FACE1 PE=2 SV=1 7.11357e-61	tr|K4AZN3|K4AZN3_SOLLC Uncharacterized protein OS=Solanum lycopersicum PE=3 SV=1 1.7e-49	GO:0004222, metalloendopeptidase activity;GO:0005773, vacuole;GO:0005783, endoplasmic reticulum;GO:0005789, endoplasmic reticulum membrane;GO:0016021, integral component of membrane;GO:0046872, metal ion binding;GO:0071586, CAAX-box protein processing	-
TRINITY_DN96480_c0_g1	0.9343906666670001	10.4113566667	-3.47798839943	0.000923876861389	0.0211907730527	down	-	-	gi|1021027657|gb|KZM85444.1| hypothetical protein DCAR_027134 [Daucus carota subsp. sativus] 1.5e-40	-	-	sp|F4JAU2|SAC3B_ARATH SAC3 family protein B OS=Arabidopsis thaliana GN=SAC3B PE=1 SV=1 8.6562e-20	tr|A0A061EVK2|A0A061EVK2_THECC SAC3/GANP/Nin1/mts3/eIF-3 p25 family, putative isoform 1 OS=Theobroma cacao GN=TCM_021077 PE=4 SV=1 3.8e-25	GO:0034399, nuclear periphery	-
TRINITY_DN65190_c0_g1	5.838801966669999	0.0001	15.8333847599	1.36129086176e-07	5.0528783147e-05	up	TIGR00617, Replication_protein_A_70_kDa_DNA-binding_subunit, replication factor-a protein 1 (rpa1). All proteins in this family for which functions are known are part of a multiprotein complex made up of homologs of RPA1, RPA2 and RPA3 that bind ssDNA and function in the recognition of DNA damage for nucleotide excision repairThis family is based on the phylogenomic analysis of JA Eisen (1999, Ph…	-	gi|1021052180|gb|KZN09958.1| hypothetical protein DCAR_002614 [Daucus carota subsp. sativus] 1.3e-107	-	-	sp|Q92372|RFA1_SCHPO Replication factor A protein 1 OS=Schizosaccharomyces pombe (strain 972 / ATCC 24843) GN=ssb1 PE=1 SV=1 1.1064e-07	-	GO:0000723, telomere maintenance;GO:0000724, double-strand break repair via homologous recombination;GO:0000784, nuclear chromosome, telomeric region;GO:0003677, DNA binding;GO:0005634, nucleus;GO:0005662, DNA replication factor A complex;GO:0005737, cytoplasm;GO:0005829, cytosol;GO:0006260, DNA replication;GO:0006268, DNA unwinding involved in DNA replication;GO:0006279, premeiotic DNA replicati…	K07466-ko03440 Homologous recombination;ko03460 Fanconi anemia pathway;ko03430 Mismatch repair;ko03030 DNA replication;ko03420 Nucleotide excision repair
TRINITY_DN89193_c2_g9	407.341633333	0.779129	9.0301613463	3.48436126264e-08	1.77466961419e-05	up	-	-	-	-	-	-	-	-	-
TRINITY_DN89193_c2_g5	385.154871	2.86149466667	7.0725259428100005	2.2426742963599996e-12	5.395459046989999e-09	up	-	-	-	-	-	-	-	-	-
TRINITY_DN72992_c0_g6	22.500966666700002	5.18427333333	2.11777329321	0.0008573689399749999	0.0203668262707	up	-	-	gi|1021043822|gb|KZN01603.1| hypothetical protein DCAR_010357 [Daucus carota subsp. sativus] 6.5e-21	-	-	-	tr|B9SCS2|B9SCS2_RICCO Catalytic, putative OS=Ricinus communis GN=RCOM_1280750 PE=4 SV=1 1.8e-15	GO:0016021, integral component of membrane	-
TRINITY_DN88096_c3_g1	1.24554886667	71.2079753333	-5.837185303790001	0.0033925608007800002	0.0455405191024	down	pfam12481, DUF3700, Aluminium induced protein. This domain family is found in eukaryotes, and is approximately 120 amino acids in length. There are two conserved sequence motifs: YGL and LRDR. This family is related to GATase enzyme domains. 6.61854e-75	-	gi|1021038519|gb|KZM96302.1| hypothetical protein DCAR_019544 [Daucus carota subsp. sativus] 9.6e-99	gi|595865119|ref|XM_007211833.1| Prunus persica hypothetical protein (PRUPE_ppa010307mg) mRNA, complete cds 4.23101e-58	pfam12481, DUF3700, Aluminium induced protein. This domain family is found in eukaryotes, and is approximately 120 amino acids in length. There are two conserved sequence motifs: YGL and LRDR. This family is related to GATase enzyme domains. 1.58122e-75	sp|P24805|TSJT1_TOBAC Stem-specific protein TSJT1 OS=Nicotiana tabacum GN=TSJT1 PE=2 SV=1 8.00827e-29	tr|A0A124SE67|A0A124SE67_CYNCS Uncharacterized protein OS=Cynara cardunculus var. scolymus GN=Ccrd_022687 PE=4 SV=1 1.0e-84	-	-
TRINITY_DN92466_c0_g1	600.281637833	84.7494371	2.82436384657	0.0026967705505000004	0.0396231903752	up	smart00332, PP2Cc, Serine/threonine phosphatases, family 2C, catalytic domain. The protein architecture and deduced catalytic mechanism of PP2C phosphatases are similar to the PP1, PP2A, PP2B family of protein Ser/Thr phosphatases, with which PP2C shares no sequence similarity. 1.72564e-09	KOG0700, KOG0700, KOG0700, Protein phosphatase 2C/pyruvate dehydrogenase (lipoamide) phosphatase [Signal transduction mechanisms]. 2.95645e-19	gi|1021040812|gb|KZM98593.1| hypothetical protein DCAR_014045 [Daucus carota subsp. sativus] 6.3e-63	gi|1025031873|ref|XM_016587394.1| PREDICTED: Nicotiana tabacum uncharacterized LOC107768282 (LOC107768282), mRNA 9.403e-54	-	sp|Q5Z8P0|P2C60_ORYSJ Probable protein phosphatase 2C 60 OS=Oryza sativa subsp. japonica GN=Os06g0717800 PE=2 SV=1 4.78325e-33	tr|A0A0A0L4W0|A0A0A0L4W0_CUCSA Uncharacterized protein OS=Cucumis sativus GN=Csa_3G002520 PE=4 SV=1 9.6e-56	GO:0004722, protein serine/threonine phosphatase activity;GO:0016021, integral component of membrane;GO:0033743, peptide-methionine (R)-S-oxide reductase activity;GO:0046872, metal ion binding	-
TRINITY_DN83924_c0_g1	81.0027904162	31.6470896848	1.3558987740900001	0.0020089852743299997	0.0334266538075	up	-	-	gi|1021026508|gb|KZM84295.1| hypothetical protein DCAR_028411 [Daucus carota subsp. sativus] 1.2e-45	gi|663673442|emb|HG975443.1| Solanum pennellii chromosome ch04, complete genome 1.74367e-13	-	sp|O22870|FK163_ARATH Peptidyl-prolyl cis-trans isomerase FKBP16-3, chloroplastic OS=Arabidopsis thaliana GN=FKBP16-3 PE=1 SV=2 2.63285e-17	-	GO:0003755, peptidyl-prolyl cis-trans isomerase activity;GO:0005528, FK506 binding;GO:0005789, endoplasmic reticulum membrane;GO:0009507, chloroplast;GO:0009534, chloroplast thylakoid;GO:0009543, chloroplast thylakoid lumen;GO:0009570, chloroplast stroma;GO:0009579, thylakoid;GO:0031977, thylakoid lumen;GO:0061077, chaperone-mediated protein folding	-
TRINITY_DN71987_c0_g1	12.058800999999999	1.5097180000000001	2.9977354689499998	0.00047408879994000004	0.0141914222017	up	-	-	-	-	-	-	-	-	-
TRINITY_DN72182_c1_g2	56.6414	4.56703666667	3.6325266472	0.000109738823157	0.00590091451642	up	-	-	-	-	-	-	-	-	-
TRINITY_DN96792_c0_g1	54.8238283333	7.81602	2.81029701063	0.00032701796986900003	0.011487991762899998	up	-	-	-	-	-	-	-	-	-
TRINITY_DN73976_c1_g1	0.9338470102399999	341.958741561	-8.51642033814	2.4430735257e-07	7.8174742369e-05	down	cd09218, TLP-PA, allergenic/antifungal thaumatin-like proteins: plant and animal homologs. This subfamily is represented by the thaumatin-like proteins (TLPs), Cherry Allergen Pru Av 2 TLP, Peach PpAZ44 TLP (a propylene-induced TLP in abscission), the Caenorhabditis elegans thaumatin family member (thn-6), and other plant and animal homologs. TLPs are involved in host defense and a wide range of …	-	gi|1021042377|gb|KZN00158.1| hypothetical protein DCAR_008912 [Daucus carota subsp. sativus] 1.6e-110	gi|319992796|emb|FN667837.1| Bupleurum kaoi mRNA for pathogenesis related gene 5 (pr5 gene) 9.52385e-115	pfam00314, Thaumatin, Thaumatin family. 6.90189e-62	sp|P50694|TLP_PRUAV Glucan endo-1,3-beta-glucosidase OS=Prunus avium PE=1 SV=1 1.67414e-67	tr|E8ZB60|E8ZB60_9APIA Pathogenesis related gene 5 OS=Bupleurum kaoi GN=pr5 PE=2 SV=1 3.3e-87	GO:0005576, extracellular region;GO:0008152, metabolic process;GO:0042973, glucan endo-1,3-beta-D-glucosidase activity	-
TRINITY_DN94863_c0_g1	728.5554533330001	90.4550316667	3.0097661241000004	5.7111395271e-06	0.00079129237803	up	smart00154, ZnF_AN1, AN1-like Zinc finger. Zinc finger at the C-terminus of An1, a ubiquitin-like protein in Xenopus laevis. 2.42307e-08	KOG3173, KOG3173, KOG3173, Predicted Zn-finger protein [General function prediction only]. 3.34605e-34	gi|1021050544|gb|KZN08322.1| hypothetical protein DCAR_000868 [Daucus carota subsp. sativus] 5.4e-65	-	-	sp|Q6NNI8|SAP1_ARATH Zinc finger A20 and AN1 domain-containing stress-associated protein 1 OS=Arabidopsis thaliana GN=SAP1 PE=1 SV=1 1.28758e-48	tr|A0A103XJH6|A0A103XJH6_CYNCS Zinc finger, A20-type OS=Cynara cardunculus var. scolymus GN=Ccrd_006061 PE=4 SV=1 1.5e-46	GO:0003677, DNA binding;GO:0008270, zinc ion binding	-
TRINITY_DN77755_c1_g2	61.1603808558	4.94187200047	3.6294678416400004	0.00020427240646499998	0.00861059228211	up	-	-	gi|1021045419|gb|KZN03200.1| hypothetical protein DCAR_011956 [Daucus carota subsp. sativus] 3.0e-14	-	-	-	tr|A0A067FB07|A0A067FB07_CITSI Uncharacterized protein (Fragment) OS=Citrus sinensis GN=CISIN_1g0039312mg PE=4 SV=1 4.4e-13	GO:0004672, protein kinase activity	-
TRINITY_DN95930_c0_g1	1.73585366667	44.7309	-4.68755454801	0.000440528851975	0.0136069579827	down	-	-	gi|1021042586|gb|KZN00367.1| hypothetical protein DCAR_009121 [Daucus carota subsp. sativus] 1.2e-20	-	-	-	-	-	-
TRINITY_DN74659_c1_g5	0.623208	10.1468133333	-4.0251691483	0.0017544015701700002	0.0309255529968	down	PLN03140, PLN03140, ABC transporter G family member; Provisional. 5.41888e-07	KOG0065, KOG0065, KOG0065, Pleiotropic drug resistance proteins (PDR1-15), ABC superfamily [Secondary metabolites biosynthesis, transport and catabolism]. 3.27276e-06	gi|1021031438|gb|KZM89223.1| hypothetical protein DCAR_026298 [Daucus carota subsp. sativus] 4.9e-09	-	-	sp|Q949G3|PDR1_NICPL Pleiotropic drug resistance protein 1 OS=Nicotiana plumbaginifolia GN=PDR1 PE=1 SV=1 2.79992e-10	tr|B9H0A5|B9H0A5_POPTR Uncharacterized protein OS=Populus trichocarpa GN=POPTR_0003s17730g PE=3 SV=2 5.4e-08	GO:0005524, ATP binding;GO:0005886, plasma membrane;GO:0006810, transport;GO:0006952, defense response;GO:0016021, integral component of membrane;GO:0016887, ATPase activity	-
TRINITY_DN74659_c1_g2	11.672263233299999	89.0635953333	-2.93175152745	0.00078032499827	0.019198657092	down	PLN03140, PLN03140, ABC transporter G family member; Provisional. 7.743e-91	KOG0065, KOG0065, KOG0065, Pleiotropic drug resistance proteins (PDR1-15), ABC superfamily [Secondary metabolites biosynthesis, transport and catabolism]. 6.01905e-68	gi|1021031438|gb|KZM89223.1| hypothetical protein DCAR_026298 [Daucus carota subsp. sativus] 5.5e-95	gi|530354315|gb|KC013237.1| Panax ginseng pleiotropic drug resistance transporter 2 (PDR2) mRNA, complete cds 6.67284e-165	-	sp|Q76CU2|PDR1_TOBAC Pleiotropic drug resistance protein 1 OS=Nicotiana tabacum GN=PDR1 PE=2 SV=1 1.29176e-101	tr|A0A096VPN4|A0A096VPN4_PANGI Pleiotropic drug resistance transporter 2 OS=Panax ginseng GN=PDR2 PE=2 SV=1 6.5e-88	GO:0005524, ATP binding;GO:0006810, transport;GO:0016021, integral component of membrane;GO:0016887, ATPase activity	-
TRINITY_DN76857_c0_g1	11.2665003333	0.523291866667	4.4282798006	5.11068610106e-05	0.00359779404975	up	pfam15054, DUF4535, Domain of unknown function (DUF4535). This family includes the uncharacterized protein C7orf73 that is found in eukaryotes. Members are generally less than 100 residues in length. Although the precise function of the domain is still unknown, members have a predicted N-terminal signal peptide sequence which suggests they are short secreted peptides. 5.19398e-12	-	gi|802769747|ref|XP_012090442.1| PREDICTED: uncharacterized protein LOC105648609 [Jatropha curcas] 2.5e-15	-	pfam15054, DUF4535, Domain of unknown function (DUF4535). This family includes the uncharacterized protein C7orf73 that is found in eukaryotes. Members are generally less than 100 residues in length. Although the precise function of the domain is still unknown, members have a predicted N-terminal signal peptide sequence which suggests they are short secreted peptides. 1.24089e-12	-	tr|A9PCZ2|A9PCZ2_POPTR Uncharacterized protein OS=Populus trichocarpa GN=POPTR_0001s00620g PE=2 SV=1 3.3e-15	-	-
TRINITY_DN73228_c0_g3	19.839882	5.722080333330001	1.7937917879799998	0.00281337168869	0.040810224382	up	cd12460, RRM2_CID8_like, RNA recognition motif 2 in Arabidopsis thaliana CTC-interacting domain protein CID8, CID9, CID10, CID11, CID12, CID 13 and similar proteins. This subgroup corresponds to the RRM2 domains found in A. thaliana CID8, CID9, CID10, CID11, CID12, CID 13 and mainly their plant homologs. These highly related RNA-binding proteins contain an N-terminal PAM2 domain (PABP-interacting…	-	gi|1021034485|gb|KZM92269.1| hypothetical protein DCAR_020366 [Daucus carota subsp. sativus] 4.9e-33	gi|731424561|ref|XM_002272187.3| PREDICTED: Vitis vinifera polyadenylate-binding protein-interacting protein 12 (LOC100245327), mRNA 1.39592e-41	-	sp|Q9LPI5|CID11_ARATH Polyadenylate-binding protein-interacting protein 11 OS=Arabidopsis thaliana GN=CID11 PE=2 SV=1 1.49412e-32	tr|A0A124RIT7|A0A124RIT7_CYNCS Ataxin-2, C-terminal OS=Cynara cardunculus var. scolymus GN=Ccrd_026104 PE=4 SV=1 9.6e-29	GO:0000166, nucleotide binding;GO:0003676, nucleic acid binding;GO:0003723, RNA binding;GO:0005634, nucleus	-
TRINITY_DN84982_c1_g2	22.196868	1.67962566667	3.72414448059	0.00197289913264	0.033105163546599994	up	-	-	-	-	-	-	-	-	-
TRINITY_DN86673_c0_g6	20.4888	2.058035	3.3154960674500003	4.06993486054e-05	0.0031435286413299996	up	-	-	-	-	-	-	-	-	-
TRINITY_DN86673_c0_g3	68.1167405667	16.801668300000003	2.01940491205	0.00112238460651	0.0236342597202	up	PLN03088, PLN03088, SGT1, suppressor of G2 allele of SKP1; Provisional. 8.58725e-09	KOG0548, KOG0548, KOG0548, Molecular co-chaperone STI1 [Posttranslational modification, protein turnover, chaperones]. 7.57453e-15	gi|1021048032|gb|KZN05812.1| hypothetical protein DCAR_006649 [Daucus carota subsp. sativus] 1.4e-28	gi|1026078324|ref|XM_016682880.1| PREDICTED: Capsicum annuum ankyrin repeat and KH domain-containing protein mask (LOC107839406), transcript variant X2, mRNA 2.63631e-33	-	sp|Q9STH1|HSOP3_ARATH Hsp70-Hsp90 organizing protein 3 OS=Arabidopsis thaliana GN=HOP3 PE=2 SV=1 5.31743e-10	tr|A0A068UED0|A0A068UED0_COFCA Uncharacterized protein OS=Coffea canephora GN=GSCOC_T00023831001 PE=4 SV=1 6.0e-27	GO:0005634, nucleus;GO:0005737, cytoplasm;GO:0009408, response to heat;GO:0009644, response to high light intensity;GO:0010286, heat acclimation;GO:0042542, response to hydrogen peroxide;GO:0051131, chaperone-mediated protein complex assembly;GO:0051879, Hsp90 protein binding;GO:0070678, preprotein binding	-
TRINITY_DN73716_c2_g7	18.1432416667	1.76709333333	3.3599820998400003	0.00023480442608200003	0.00937442600184	up	-	-	-	-	-	-	-	-	-
TRINITY_DN76749_c3_g1	19.0776726667	1.31117033333	3.8629581616000004	0.00011644384514700001	0.006070499878979999	up	-	-	-	-	-	-	-	-	-
TRINITY_DN91819_c0_g1	0.536776955206	10.0943289667	-4.23307846326	6.96379874657e-07	0.000176256584247	down	PLN02316, PLN02316, synthase/transferase. 0.0	-	gi|1021049537|gb|KZN07317.1| hypothetical protein DCAR_008154 [Daucus carota subsp. sativus] 4.0e-298	gi|927528788|gb|KP987237.1| Camellia sinensis starch synthase 3 mRNA, complete cds 0.0	pfam08323, Glyco_transf_5, Starch synthase catalytic domain. 5.29959e-26	sp|Q43846|SSY3_SOLTU Soluble starch synthase 3, chloroplastic/amyloplastic OS=Solanum tuberosum GN=SS3 PE=1 SV=1 0.0	tr|C6KI36|C6KI36_SOLLC Starch synthase III OS=Solanum lycopersicum PE=2 SV=1 1.4e-226	GO:0004373, glycogen (starch) synthase activity;GO:0009011, starch synthase activity;GO:0009501, amyloplast;GO:0009507, chloroplast;GO:0019252, starch biosynthetic process;GO:0033201, alpha-1,4-glucan synthase activity;GO:2001070, starch binding	K00703-ko00500 Starch and sucrose metabolism
TRINITY_DN75400_c1_g2	5.91102666667	0.6875205333329999	3.10393402261	0.00016711202701400003	0.007585083018340001	up	-	-	gi|1021038550|gb|KZM96333.1| hypothetical protein DCAR_019575 [Daucus carota subsp. sativus] 3.8e-66	gi|802540396|ref|XM_012220856.1| PREDICTED: Jatropha curcas histone-lysine N-methyltransferase SETD1B (LOC105637405), mRNA 9.98779e-21	-	-	tr|A0A0V0IR39|A0A0V0IR39_SOLCH Putative ovule protein OS=Solanum chacoense PE=4 SV=1 2.1e-40	-	-
TRINITY_DN93277_c0_g2	0.553742333333	7.933516666669999	-3.8406737823699997	0.0038858905478899998	0.0490985785487	down	PLN00149, PLN00149, potassium transporter; Provisional. 1.44101e-23	-	gi|976920062|gb|KVI04810.1| potassium transporter [Cynara cardunculus var. scolymus] 1.1e-22	gi|1028998481|ref|XM_016898532.1| PREDICTED: Gossypium hirsutum potassium transporter 2-like (LOC107962213), transcript variant X12, mRNA 3.50203e-53	-	sp|Q8VXB5|HAK8_ORYSJ Putative potassium transporter 8 OS=Oryza sativa subsp. japonica GN=HAK8 PE=3 SV=2 4.2983e-27	tr|A0A103Y978|A0A103Y978_CYNCS Potassium transporter OS=Cynara cardunculus var. scolymus GN=Ccrd_016867 PE=4 SV=1 8.1e-23	GO:0005886, plasma membrane;GO:0015079, potassium ion transmembrane transporter activity;GO:0016021, integral component of membrane	-
TRINITY_DN80683_c3_g3	5.33477333333	0.501735333333	3.41042852973	0.00061061362558	0.016602607483	up	-	-	gi|720044404|ref|XP_010269876.1| PREDICTED: ATP synthase subunit delta', mitochondrial-like [Nelumbo nucifera] 1.0e-11	gi|566202656|ref|XM_006375135.1| Populus trichocarpa H+-transporting two-sector ATPase family protein (POPTR_0014s05190g) mRNA, complete cds 2.86783e-21	-	sp|Q40089|ATP4_IPOBA ATP synthase subunit delta', mitochondrial OS=Ipomoea batatas PE=1 SV=1 4.13688e-15	tr|M5WVK3|M5WVK3_PRUPE Uncharacterized protein OS=Prunus persica GN=PRUPE_ppa011618mg PE=3 SV=1 2.3e-11	GO:0000275, mitochondrial proton-transporting ATP synthase complex, catalytic core F(1);GO:0005743, mitochondrial inner membrane;GO:0008270, zinc ion binding;GO:0015986, ATP synthesis coupled proton transport;GO:0045261, proton-transporting ATP synthase complex, catalytic core F(1);GO:0046933, proton-transporting ATP synthase activity, rotational mechanism;GO:0046961, proton-transporting ATPase a…	-
TRINITY_DN89835_c0_g3	15.962897733299998	1.45328966667	3.45732837501	0.0023912476770999998	0.036982922705099994	up	-	-	-	-	-	-	-	-	-
TRINITY_DN87487_c0_g1	30.7953003333	4.502498200000001	2.7739125937299995	0.000241690977053	0.009540315361020001	up	-	KOG0907, KOG0907, KOG0907, Thioredoxin [Posttranslational modification, protein turnover, chaperones]. 1.09374e-09	gi|802544258|ref|XP_012082815.1| PREDICTED: thioredoxin H2 [Jatropha curcas] 2.0e-11	-	-	sp|P29448|TRXH1_ARATH Thioredoxin H1 OS=Arabidopsis thaliana GN=TRX1 PE=1 SV=1 5.53258e-10	tr|A0A067LAN2|A0A067LAN2_JATCU Uncharacterized protein OS=Jatropha curcas GN=JCGZ_09716 PE=4 SV=1 1.5e-11	GO:0000103, sulfate assimilation;GO:0005623, cell;GO:0005829, cytosol;GO:0005886, plasma membrane;GO:0006457, protein folding;GO:0006662, glycerol ether metabolic process;GO:0008047, enzyme activator activity;GO:0015035, protein disulfide oxidoreductase activity;GO:0016671, oxidoreductase activity, acting on a sulfur group of donors, disulfide as acceptor;GO:0034599, cellular response to oxidativ…	-
TRINITY_DN93335_c1_g7	21.3678333333	4.22317666667	2.339040123	0.000313309238536	0.0112130182962	up	-	-	-	-	-	-	-	-	-
TRINITY_DN75330_c0_g5	224.191333333	16.2334666667	3.787687482	4.11070344152e-09	3.06717513067e-06	up	-	-	-	-	-	-	-	-	-
TRINITY_DN98616_c3_g3	0.282003	7.953683333330001	-4.81784070858	0.00037290312342900004	0.012406607456	down	-	-	-	-	-	-	-	-	-
TRINITY_DN93718_c0_g1	0.8483646666670001	6.20184333333	-2.8699406412700004	0.0025502509559299997	0.0383109739465	down	-	KOG1104, KOG1104, KOG1104, Nuclear cap-binding complex, subunit NCBP1/CBP80 [RNA processing and modification]. 9.11773e-32	gi|1021043119|gb|KZN00900.1| hypothetical protein DCAR_009654 [Daucus carota subsp. sativus] 2.3e-124	-	-	sp|Q9SIU2|NCBP1_ARATH Nuclear cap-binding protein subunit 1 OS=Arabidopsis thaliana GN=ABH1 PE=1 SV=2 4.40191e-104	tr|D7T129|D7T129_VITVI Putative uncharacterized protein OS=Vitis vinifera GN=VIT_06s0009g03810 PE=4 SV=1 1.7e-108	GO:0000339, RNA cap binding;GO:0000394, RNA splicing, via endonucleolytic cleavage and ligation;GO:0005634, nucleus;GO:0005737, cytoplasm;GO:0005846, nuclear cap binding complex;GO:0006370, 7-methylguanosine mRNA capping;GO:0009737, response to abscisic acid;GO:0031053, primary miRNA processing;GO:0045292, mRNA cis splicing, via spliceosome;GO:0048574, long-day photoperiodism, flowering;GO:005102…	K12882-ko03015 mRNA surveillance pathway;ko03013 RNA transport;ko03040 Spliceosome
TRINITY_DN83723_c0_g2	1.2016658666700002	7.0095089999999995	-2.5442775920200003	0.00165549761948	0.029890745494	down	PTZ00184, PTZ00184, calmodulin; Provisional. 4.79696e-09	KOG0027, KOG0027, KOG0027, Calmodulin and related proteins (EF-Hand superfamily) [Signal transduction mechanisms]. 1.99852e-14	gi|1021046941|gb|KZN04721.1| hypothetical protein DCAR_005558 [Daucus carota subsp. sativus] 1.3e-81	gi|343780987|gb|AC148652.2| Medicago truncatula strain A17 clone mte1-26g9, complete sequence 1.19857e-21	pfam13499, EF-hand_7, EF-hand domain pair. 9.28883e-06	sp|Q93Z27|CML45_ARATH Probable calcium-binding protein CML45 OS=Arabidopsis thaliana GN=CML45 PE=1 SV=1 6.32109e-37	tr|M5WVB8|M5WVB8_PRUPE Uncharacterized protein OS=Prunus persica GN=PRUPE_ppa011701mg PE=4 SV=1 5.1e-38	GO:0005509, calcium ion binding	K02183-ko04626 Plant-pathogen interaction;ko04745 Phototransduction - fly;ko04910 Insulin signaling pathway;ko04020 Calcium signaling pathway;ko04916 Melanogenesis;ko04970 Salivary secretion;ko04728 Dopaminergic synapse;ko04713 Circadian entrainment;ko04925 Aldosterone synthesis and secretion;ko04261 Adrenergic signaling in cardiomyocytes;ko04971 Gastric acid secretion;ko04270 Vascular smooth mus…
TRINITY_DN79041_c3_g1	85.8000453333	13.9306674333	2.62271402931	0.0006380407980640001	0.0169814248313	up	-	-	gi|870765728|gb|KMS65245.1| hypothetical protein BVRB_037930, partial [Beta vulgaris subsp. vulgaris] 1.4e-11	gi|664782987|gb|CP008884.1| Dyella japonica A8, complete genome 0.0	-	-	tr|A0A0J8BHP9|A0A0J8BHP9_BETVU Uncharacterized protein (Fragment) OS=Beta vulgaris subsp. vulgaris GN=BVRB_037930 PE=4 SV=1 1.1e-11	-	-
TRINITY_DN80016_c0_g3	64.904737	3.1274986666699998	4.37524260111	5.65686722462e-05	0.0038316279907199997	up	cd14066, STKc_IRAK, Catalytic domain of the Serine/Threonine kinases, Interleukin-1 Receptor Associated Kinases and related STKs. STKs catalyze the transfer of the gamma-phosphoryl group from ATP to serine/threonine residues on protein substrates. IRAKs are involved in Toll-like receptor (TLR) and interleukin-1 (IL-1) signalling pathways, and are thus critical in regulating innate immune response…	KOG1187, KOG1187, KOG1187, Serine/threonine protein kinase [Signal transduction mechanisms]. 2.31183e-15	gi|697156910|ref|XP_009587207.1| PREDICTED: G-type lectin S-receptor-like serine/threonine-protein kinase At4g27290 isoform X1 [Nicotiana tomentosiformis] 4.0e-34	gi|297799259|ref|XM_002867468.1| Arabidopsis lyrata subsp. lyrata hypothetical protein, mRNA 4.33624e-24	-	sp|O81833|SD11_ARATH G-type lectin S-receptor-like serine/threonine-protein kinase SD1-1 OS=Arabidopsis thaliana GN=SD11 PE=1 SV=1 1.00304e-37	tr|A0A061F772|A0A061F772_THECC Serine/threonine kinases,protein kinases,ATP binding,sugar binding,kinases,carbohydrate binding, putative OS=Theobroma cacao GN=TCM_046861 PE=4 SV=1 2.2e-32	GO:0004674, protein serine/threonine kinase activity;GO:0005516, calmodulin binding;GO:0005524, ATP binding;GO:0005886, plasma membrane;GO:0006468, protein phosphorylation;GO:0006952, defense response;GO:0009506, plasmodesma;GO:0016021, integral component of membrane;GO:0030246, carbohydrate binding;GO:0031625, ubiquitin protein ligase binding;GO:0048544, recognition of pollen	-
TRINITY_DN97033_c2_g2	45.6601984667	6.84836153	2.73710636061	0.000269660238148	0.010291609923200001	up	-	-	gi|1021031916|gb|KZM89700.1| hypothetical protein DCAR_022937 [Daucus carota subsp. sativus] 4.6e-12	gi|985442319|ref|XM_006473760.2| PREDICTED: Citrus sinensis protein canopy-1 (LOC102624676), mRNA 3.98303e-19	-	-	tr|W9QWH6|W9QWH6_9ROSA Uncharacterized protein OS=Morus notabilis GN=L484_024837 PE=4 SV=1 8.6e-11	-	-
TRINITY_DN94183_c2_g2	21.044026666700002	0.5848630666669999	5.16916808546	1.43624756354e-07	5.28506303063e-05	up	-	-	-	-	-	-	-	-	-
TRINITY_DN72543_c0_g3	6.829	0.0333376666667	7.67837739135	9.962821084549998e-07	0.00023278955726199998	up	-	-	-	-	-	-	-	-	-
TRINITY_DN68452_c4_g2	4.2548544	37.3178556	-3.1326844176099997	0.00012739536318700001	0.0063552880289399994	down	-	KOG0729, KOG0729, KOG0729, 26S proteasome regulatory complex, ATPase RPT1 [Posttranslational modification, protein turnover, chaperones]. 1.96511e-32	gi|37932204|gb|AAP72958.1| 26S proteasome subunit 7-like protein [Lactuca sativa] 1.3e-43	gi|37932195|gb|AY243359.1| Lactuca sativa clone 1 26S proteasome subunit 7-like protein mRNA, complete cds 1.03463e-87	-	sp|Q9SSB5|PRS7A_ARATH 26S protease regulatory subunit 7 homolog A OS=Arabidopsis thaliana GN=RPT1A PE=1 SV=1 2.7754e-46	tr|A1KXE0|A1KXE0_LACSA 26S proteasome subunit 7-like protein OS=Lactuca sativa PE=2 SV=1 9.9e-44	GO:0000502, proteasome complex;GO:0005524, ATP binding;GO:0005634, nucleus;GO:0005737, cytoplasm;GO:0005829, cytosol;GO:0005886, plasma membrane;GO:0016787, hydrolase activity;GO:0017025, TBP-class protein binding;GO:0030163, protein catabolic process;GO:0030433, ubiquitin-dependent ERAD pathway;GO:0031595, nuclear proteasome complex;GO:0031597, cytosolic proteasome complex;GO:0036402, proteasome…	-
TRINITY_DN95143_c2_g4	16.799808666700002	1.40528233333	3.5795128876699995	0.00254887510471	0.0383057506461	up	-	-	-	-	-	-	-	-	-
TRINITY_DN68846_c1_g2	349.22995133300003	68.3441666667	2.35328718464	0.00259990145594	0.0387904853915	up	PTZ00272, PTZ00272, heat shock protein 83 kDa (Hsp83); Provisional. 3.13643e-07	KOG0019, KOG0019, KOG0019, Molecular chaperone (HSP90 family) [Posttranslational modification, protein turnover, chaperones]. 3.29026e-06	gi|1021036038|gb|KZM93821.1| hypothetical protein DCAR_017066 [Daucus carota subsp. sativus] 5.0e-22	gi|595842055|ref|XM_007208275.1| Prunus persica hypothetical protein (PRUPE_ppa002220mg) mRNA, complete cds 4.63211e-44	pfam00183, HSP90, Hsp90 protein. 1.69551e-06	sp|O03986|HS904_ARATH Heat shock protein 90-4 OS=Arabidopsis thaliana GN=HSP90-4 PE=1 SV=1 1.01659e-24	tr|G7K4R2|G7K4R2_MEDTR Heat shock protein 81-2 OS=Medicago truncatula GN=MTR_5g096430 PE=3 SV=1 3.2e-21	GO:0005524, ATP binding;GO:0005618, cell wall;GO:0005634, nucleus;GO:0005774, vacuolar membrane;GO:0005794, Golgi apparatus;GO:0005829, cytosol;GO:0005886, plasma membrane;GO:0006457, protein folding;GO:0006950, response to stress;GO:0009570, chloroplast stroma;GO:0048046, apoplast	-
TRINITY_DN74605_c2_g1	1.99497666667	15.1535	-2.92520727325	0.0035762278672600003	0.046920022939599994	down	-	-	gi|1021053396|gb|KZN11174.1| hypothetical protein DCAR_003830 [Daucus carota subsp. sativus] 1.8e-43	-	-	sp|F4I171|MD15A_ARATH Mediator of RNA polymerase II transcription subunit 15a OS=Arabidopsis thaliana GN=MED15A PE=1 SV=1 5.69927e-25	tr|A0A061G942|A0A061G942_THECC Uncharacterized protein OS=Theobroma cacao GN=TCM_027312 PE=4 SV=1 2.1e-36	GO:0003712, transcription cofactor activity;GO:0005634, nucleus;GO:0006351, transcription, DNA-templated;GO:0006355, regulation of transcription, DNA-templated;GO:0009751, response to salicylic acid;GO:0016592, mediator complex	-
TRINITY_DN85145_c0_g1	0.8127196	7.722598466669999	-3.2482567683599997	0.00271009880144	0.0397650525965	down	PLN02885, PLN02885, nicotinate phosphoribosyltransferase. 4.93135e-55	KOG2511, KOG2511, KOG2511, Nicotinic acid phosphoribosyltransferase [Coenzyme transport and metabolism]. 4.92649e-28	gi|1021044347|gb|KZN02128.1| hypothetical protein DCAR_010882 [Daucus carota subsp. sativus] 3.5e-52	gi|720024005|ref|XM_010265203.1| PREDICTED: Nelumbo nucifera nicotinate phosphoribosyltransferase-like (LOC104601745), transcript variant X2, mRNA 1.72694e-88	-	sp|Q8RWM2|NPRT1_ARATH Nicotinate phosphoribosyltransferase 1 OS=Arabidopsis thaliana GN=NAPRT1 PE=2 SV=1 4.94289e-54	tr|G7K6L6|G7K6L6_MEDTR Nicotinate phosphoribosyltransferase-like protein OS=Medicago truncatula GN=MTR_5g017050 PE=4 SV=1 1.6e-49	GO:0004514, nicotinate-nucleotide diphosphorylase (carboxylating) activity;GO:0004516, nicotinate phosphoribosyltransferase activity;GO:0009435, NAD biosynthetic process;GO:0016874, ligase activity;GO:0019358, nicotinate nucleotide salvage	K00763-ko00760 Nicotinate and nicotinamide metabolism
TRINITY_DN67901_c1_g1	1.02285533333	19.9039741333	-4.2823824974099995	0.0014023847061800001	0.0271034523532	down	TIGR00957, Multidrug_resistance-associated_protein_1, multi drug resistance-associated protein (MRP). This model describes multi drug resistance-associated protein (MRP) in eukaryotes. The multidrug resistance-associated protein is an integral membrane protein that causes multidrug resistance when overexpressed in mammalian cells. It belongs to ABC transporter superfamily. The protein topology an…	KOG0054, KOG0054, KOG0054, Multidrug resistance-associated protein/mitoxantrone resistance protein, ABC superfamily [Secondary metabolites biosynthesis, transport and catabolism]. 7.78624e-115	gi|1021053171|gb|KZN10949.1| hypothetical protein DCAR_003605 [Daucus carota subsp. sativus] 5.1e-196	gi|731335308|ref|XM_010680359.1| PREDICTED: Beta vulgaris subsp. vulgaris ABC transporter C family member 3-like (LOC104894183), mRNA 0.0	pfam00005, ABC_tran, ABC transporter. ABC transporters for a large family of proteins responsible for translocation of a variety of compounds across biological membranes. ABC transporters are the largest family of proteins in many completely sequenced bacteria. ABC transporters are composed of two copies of this domain and two copies of a transmembrane domain pfam00664. These four domains may bel…	sp|Q9LK64|AB3C_ARATH ABC transporter C family member 3 OS=Arabidopsis thaliana GN=ABCC3 PE=1 SV=1 0.0	tr|A0A0K9R6E7|A0A0K9R6E7_SPIOL Uncharacterized protein OS=Spinacia oleracea GN=SOVF_101510 PE=4 SV=1 1.1e-193	GO:0000325, plant-type vacuole;GO:0005524, ATP binding;GO:0005773, vacuole;GO:0005774, vacuolar membrane;GO:0008559, xenobiotic transmembrane transporting ATPase activity;GO:0009506, plasmodesma;GO:0010290, chlorophyll catabolite transmembrane transporter activity;GO:0015431, glutathione S-conjugate-exporting ATPase activity;GO:0016021, integral component of membrane;GO:0042626, ATPase activity, …	-
TRINITY_DN82616_c1_g1	12.7670984667	1.03395533333	3.62618491812	0.000498461440754	0.014611263450899999	up	-	-	-	-	-	-	-	-	-
TRINITY_DN82616_c1_g3	5.24856666667	0.0001	15.6796358699	4.36336212809e-06	0.000659141659894	up	-	-	-	-	-	-	-	-	-
TRINITY_DN96968_c1_g4	22.6145333333	0.514545	5.457809160190001	1.09612211332e-05	0.0012551229342100002	up	-	-	-	-	-	-	-	-	-
TRINITY_DN93245_c0_g6	0.20390766666700003	5.6720656	-4.7978862931199995	0.0021082559759	0.0343614323394	down	-	-	-	-	-	-	-	-	-
TRINITY_DN80990_c1_g2	0.510076	27.2893472	-5.74148185257	0.00268262735099	0.039513701777400004	down	-	-	gi|296085552|emb|CBI29284.3| unnamed protein product [Vitis vinifera] 4.1e-10	-	-	-	tr|F6HJ80|F6HJ80_VITVI Putative uncharacterized protein OS=Vitis vinifera GN=VIT_01s0150g00360 PE=4 SV=1 3.1e-10	GO:0000166, nucleotide binding;GO:0003676, nucleic acid binding	-
TRINITY_DN96360_c2_g1	8.034612333330001	2.486697	1.69199768794	0.0008178924006689999	0.0197869037878	up	-	-	gi|1021051444|gb|KZN09222.1| hypothetical protein DCAR_001878 [Daucus carota subsp. sativus] 3.0e-47	gi|595837519|ref|XM_007207411.1| Prunus persica hypothetical protein (PRUPE_ppa006241mg) mRNA, complete cds 5.93971e-27	-	-	tr|A0A068VDK6|A0A068VDK6_COFCA Uncharacterized protein OS=Coffea canephora GN=GSCOC_T00003861001 PE=4 SV=1 4.2e-41	GO:0016021, integral component of membrane	-
TRINITY_DN75701_c1_g1	15.6903333333	0.138419333333	6.8246867303	1.16112851281e-05	0.00130716507464	up	-	-	-	-	-	-	-	-	-
TRINITY_DN73703_c4_g5	14.655029999999998	0.0001	17.1610363958	5.194518272430001e-06	0.0007465051403139998	up	-	-	-	-	-	-	-	-	-
TRINITY_DN68442_c2_g1	0.0717193669537	5.194262	-6.1784122215499995	0.00022393650265799999	0.00910828025325	down	-	-	gi|902222094|gb|KNA19093.1| hypothetical protein SOVF_064810 [Spinacia oleracea] 1.4e-31	-	-	-	tr|A0A0K9RHX2|A0A0K9RHX2_SPIOL Uncharacterized protein OS=Spinacia oleracea GN=SOVF_064810 PE=4 SV=1 1.1e-31	GO:0016021, integral component of membrane	-
TRINITY_DN93749_c1_g1	568.906479667	0.360682	10.6232483711	1.2962428513099998e-16	8.42000468923e-13	up	cd06472, ACD_ScHsp26_like, Alpha crystallin domain (ACD) found in Saccharomyces cerevisiae (Sc) small heat shock protein (Hsp)26 and similar proteins. sHsps are molecular chaperones that suppress protein aggregation and protect against cell stress, and are generally active as large oligomers consisting of multiple subunits. ScHsp26 is temperature-regulated, it switches from an inactive to a chape…	KOG0710, KOG0710, KOG0710, Molecular chaperone (small heat-shock protein Hsp26/Hsp42) [Posttranslational modification, protein turnover, chaperones]. 4.71364e-11	gi|1021032859|gb|KZM90643.1| hypothetical protein DCAR_021992 [Daucus carota subsp. sativus] 2.1e-41	gi|409905492|gb|JX482109.1| Tamarix hispida ACD-ScHsp26-like protein (HSP5) mRNA, complete cds 2.23739e-18	-	sp|P27396|HSP11_DAUCA 17.8 kDa class I heat shock protein OS=Daucus carota PE=3 SV=1 5.41764e-50	tr|M5X1C6|M5X1C6_PRUPE Uncharacterized protein OS=Prunus persica GN=PRUPE_ppa012538mg PE=3 SV=1 1.7e-38	GO:0005737, cytoplasm	K13993-ko04141 Protein processing in endoplasmic reticulum
TRINITY_DN83759_c0_g1	270.9592933	21.874125433299998	3.6307788875199996	0.000104928878525	0.00574912178115	up	pfam02679, ComA, (2R)-phospho-3-sulfolactate synthase (ComA). In methanobacteria (2R)-phospho-3-sulfolactate synthase (ComA) catalyzes the first step of the biosynthesis of coenzyme M from phosphoenolpyruvate (P-enolpyruvate). This novel enzyme catalyzes the stereospecific Michael addition of sulfite to P-enolpyruvate, forming L-2-phospho-3-sulfolactate (PSL). It is suggested that the ComA-cataly…	-	gi|1021026641|gb|KZM84428.1| hypothetical protein DCAR_028150 [Daucus carota subsp. sativus] 1.1e-86	gi|1028936601|ref|XM_016855987.1| PREDICTED: Gossypium hirsutum protein HEAT-STRESS-ASSOCIATED 32-like (LOC107925322), mRNA 7.3273e-39	pfam02679, ComA, (2R)-phospho-3-sulfolactate synthase (ComA). In methanobacteria (2R)-phospho-3-sulfolactate synthase (ComA) catalyzes the first step of the biosynthesis of coenzyme M from phosphoenolpyruvate (P-enolpyruvate). This novel enzyme catalyzes the stereospecific Michael addition of sulfite to P-enolpyruvate, forming L-2-phospho-3-sulfolactate (PSL). It is suggested that the ComA-cataly…	sp|Q8GWL1|HSA32_ARATH Protein HEAT-STRESS-ASSOCIATED 32 OS=Arabidopsis thaliana GN=HSA32 PE=2 SV=1 5.0287e-80	tr|B9HYU2|B9HYU2_POPTR (2R)-phospho-3-sulfolactate synthase-related family protein OS=Populus trichocarpa GN=POPTR_0011s03420g PE=4 SV=1 4.3e-72	GO:0003824, catalytic activity;GO:0009408, response to heat;GO:0010286, heat acclimation;GO:0010608, posttranscriptional regulation of gene expression	-
TRINITY_DN53591_c0_g1	12.3189033333	1.4610299999999998	3.07581612152	0.000596057854507	0.016336763736399997	up	PHA00452, PHA00452, T3/T7-like RNA polymerase. 1.45342e-39	KOG1038, KOG1038, KOG1038, Mitochondrial/chloroplast DNA-directed RNA polymerase RPO41, provides primers for DNA replication-initiation [Transcription, Replication, recombination and repair]. 4.76629e-07	-	gi|1008889473|gb|CP014768.1| Shigella sp. PAMC 28760, complete genome 0.0	-	sp|P00573|RPOL_BPT7 T7 RNA polymerase OS=Enterobacteria phage T7 GN=1 PE=1 SV=2 1.38132e-85	-	GO:0003677, DNA binding;GO:0003899, DNA-directed 5'-3' RNA polymerase activity;GO:0039695, DNA-templated viral transcription	-
TRINITY_DN93122_c1_g1	22.1920682732	1.39995553333	3.98659122237	1.42213677616e-05	0.00150697779069	up	PRK11107, PRK11107, hybrid sensory histidine kinase BarA; Provisional. 1.52157e-26	KOG0519, KOG0519, KOG0519, Sensory transduction histidine kinase [Signal transduction mechanisms]. 2.68329e-18	gi|1021045837|gb|KZN03618.1| hypothetical protein DCAR_012374 [Daucus carota subsp. sativus] 8.5e-102	-	pfam02518, HATPase_c, Histidine kinase-, DNA gyrase B-, and HSP90-like ATPase. This family represents the structurally related ATPase domains of histidine kinase, DNA gyrase B and HSP90. 4.7633e-06	sp|Q9M7M1|ETR1_PRUPE Ethylene receptor OS=Prunus persica GN=ETR1 PE=2 SV=1 6.38098e-86	tr|L7VBY1|L7VBY1_9ROSA Ethylene receptor 1 OS=Eriobotrya japonica GN=ETR1c PE=2 SV=1 4.2e-77	GO:0000155, phosphorelay sensor kinase activity;GO:0005524, ATP binding;GO:0005789, endoplasmic reticulum membrane;GO:0010105, negative regulation of ethylene-activated signaling pathway;GO:0016021, integral component of membrane;GO:0038199, ethylene receptor activity;GO:0046872, metal ion binding;GO:0051740, ethylene binding	-
TRINITY_DN97324_c0_g1	61.3173333333	15.9821811667	1.93983064275	0.0010312821718700001	0.022524880981200004	up	-	-	-	-	-	-	-	-	-
TRINITY_DN77873_c1_g2	11.229703	0.39080083333300003	4.84474241835	9.159368422130001e-08	3.83848448127e-05	up	PLN02687, PLN02687, flavonoid 3'-monooxygenase. 8.81258e-46	KOG0156, KOG0156, KOG0156, Cytochrome P450 CYP2 subfamily [Secondary metabolites biosynthesis, transport and catabolism]. 2.85327e-39	gi|1021032730|gb|KZM90514.1| hypothetical protein DCAR_022121 [Daucus carota subsp. sativus] 1.0e-138	gi|40457627|gb|AY428479.1| Populus alba x Populus tremula clone GT1-100 sequence flanking Ds5 gene trap insertion 7.97136e-58	pfam00067, p450, Cytochrome P450. Cytochrome P450s are haem-thiolate proteins involved in the oxidative degradation of various compounds. They are particularly well known for their role in the degradation of environmental toxins and mutagens. They can be divided into 4 classes, according to the method by which electrons from NAD(P)H are delivered to the catalytic site. Sequence conservation is re…	sp|Q9ZNR0|C78A6_ARATH Cytochrome P450 78A6 OS=Arabidopsis thaliana GN=CYP78A6 PE=2 SV=1 6.53701e-120	tr|F4YF83|F4YF83_9APIA Cytochrome P450 (Fragment) OS=Panax notoginseng PE=2 SV=1 2.0e-118	GO:0004497, monooxygenase activity;GO:0005506, iron ion binding;GO:0016020, membrane;GO:0016021, integral component of membrane;GO:0016705, oxidoreductase activity, acting on paired donors, with incorporation or reduction of molecular oxygen;GO:0016709, oxidoreductase activity, acting on paired donors, with incorporation or reduction of molecular oxygen, NAD(P)H as one donor, and incorporation of…	-
TRINITY_DN94045_c1_g5	5.3579027333300004	0.105451	5.6670237094199996	0.00016344067546399997	0.00747053974995	up	-	-	-	-	-	-	-	-	-
TRINITY_DN92204_c1_g1	8.30828433333	0.312288	4.7336015517500005	0.000355967708825	0.012033406132499999	up	-	-	-	-	-	-	-	-	-
TRINITY_DN92204_c1_g3	23.0234666667	0.9242600000000001	4.63866251996	7.38020863276e-05	0.00459191774098	up	-	-	-	-	-	-	-	-	-
TRINITY_DN91047_c2_g1	54.9677666667	5.415690000000001	3.3433687991000003	3.67582159578e-05	0.00295142575274	up	pfam00183, HSP90, Hsp90 protein. 1.72294e-45	KOG0019, KOG0019, KOG0019, Molecular chaperone (HSP90 family) [Posttranslational modification, protein turnover, chaperones]. 3.84457e-37	gi|449445987|ref|XP_004140753.1| PREDICTED: heat shock protein 83 [Cucumis sativus] 1.0e-55	gi|566165381|ref|XM_002305227.2| Populus trichocarpa hypothetical protein (POPTR_0004s07190g) mRNA, complete cds 1.65152e-117	pfam00183, HSP90, Hsp90 protein. 4.11625e-46	sp|P27323|HS901_ARATH Heat shock protein 90-1 OS=Arabidopsis thaliana GN=HSP90-1 PE=1 SV=3 1.31671e-67	tr|B9MX47|B9MX47_POPTR Uncharacterized protein OS=Populus trichocarpa GN=POPTR_0017s01160g PE=3 SV=1 7.7e-56	GO:0005524, ATP binding;GO:0005737, cytoplasm;GO:0006457, protein folding;GO:0006950, response to stress;GO:0009816, defense response to bacterium, incompatible interaction	-
TRINITY_DN91047_c2_g3	10.493801	0.29485163333299996	5.15340434047	2.67067628464e-07	8.20154225128e-05	up	pfam00183, HSP90, Hsp90 protein. 6.90037e-137	KOG0020, KOG0020, KOG0020, Endoplasmic reticulum glucose-regulated protein (GRP94/endoplasmin), HSP90 family [Posttranslational modification, protein turnover, chaperones]. 1.46353e-90	gi|255545176|ref|XP_002513649.1| PREDICTED: heat shock protein 83 [Ricinus communis] 3.2e-143	gi|33326374|gb|AF521007.1| Hevea brasiliensis heat shock protein mRNA, complete cds 0.0	pfam00183, HSP90, Hsp90 protein. 1.64856e-137	sp|P51819|HSP83_IPONI Heat shock protein 83 OS=Ipomoea nil GN=HSP83A PE=2 SV=1 0.0	tr|I1L314|I1L314_SOYBN Heat shock protein 90-1 OS=Glycine max GN=GLYMA_09G131500 PE=2 SV=1 2.5e-143	GO:0005524, ATP binding;GO:0005737, cytoplasm;GO:0006457, protein folding;GO:0006950, response to stress	-
TRINITY_DN78594_c0_g1	40.269844633299996	6.1108877	2.7202460322500004	0.0033035649573699994	0.0447995133478	up	-	-	-	-	-	-	-	-	-
TRINITY_DN78065_c3_g2	24.726329999999997	0.142155333333	7.44243608715	0.0010085900104099999	0.022231076113400004	up	-	-	-	-	-	-	-	-	-
TRINITY_DN70948_c4_g3	17.5610766667	0.7223866	4.60346635713	0.00015064321495	0.007096660518359999	up	-	-	-	-	-	-	-	-	-
TRINITY_DN82882_c0_g3	1956.33333333	330.484333333	2.56549842013	3.58596404702e-05	0.0029007903686399995	up	-	-	-	-	-	-	-	-	-
TRINITY_DN68815_c0_g1	189.96837230000003	0.6963936666670001	8.09164044744	9.154541829889999e-14	3.4979504332e-10	up	cd06472, ACD_ScHsp26_like, Alpha crystallin domain (ACD) found in Saccharomyces cerevisiae (Sc) small heat shock protein (Hsp)26 and similar proteins. sHsps are molecular chaperones that suppress protein aggregation and protect against cell stress, and are generally active as large oligomers consisting of multiple subunits. ScHsp26 is temperature-regulated, it switches from an inactive to a chape…	KOG0710, KOG0710, KOG0710, Molecular chaperone (small heat-shock protein Hsp26/Hsp42) [Posttranslational modification, protein turnover, chaperones]. 5.3457e-17	gi|358248934|ref|NP_001239965.1| uncharacterized protein LOC100802108 [Glycine max] 1.8e-31	gi|950989289|ref|XM_014648644.1| PREDICTED: Vigna radiata var. radiata 15.7 kDa heat shock protein, peroxisomal (LOC106764360), mRNA 6.07936e-22	pfam00011, HSP20, Hsp20/alpha crystallin family. Not only do small heat-shock-proteins occur in eukaryotes and prokaryotes but they have also now been shown to occur in cyanobacterial phages as well as their bacterial hosts. 2.13245e-10	sp|Q9FHQ3|HS157_ARATH 15.7 kDa heat shock protein, peroxisomal OS=Arabidopsis thaliana GN=HSP15.7 PE=2 SV=1 3.5028e-29	tr|C6TNH7|C6TNH7_SOYBN Uncharacterized protein OS=Glycine max GN=GLYMA_14G214800 PE=2 SV=1 1.4e-31	GO:0000302, response to reactive oxygen species;GO:0005782, peroxisomal matrix;GO:0006457, protein folding;GO:0009408, response to heat	K13993-ko04141 Protein processing in endoplasmic reticulum
TRINITY_DN97821_c1_g1	1.26079533333	19.8813996517	-3.9790133212	0.000309763091953	0.0111478760139	down	cd00195, UBCc, Ubiquitin-conjugating enzyme E2, catalytic (UBCc) domain. This is part of the ubiquitin-mediated protein degradation pathway in which a thiol-ester linkage forms between a conserved cysteine and the C-terminus of ubiquitin and complexes with ubiquitin protein ligase enzymes, E3. This pathway regulates many fundamental cellular processes. There are also other E2s which form thiol-es…	KOG0428, KOG0428, KOG0428, Non-canonical ubiquitin conjugating enzyme 1 [Posttranslational modification, protein turnover, chaperones]. 8.5438e-24	gi|1021038720|gb|KZM96503.1| hypothetical protein DCAR_019745 [Daucus carota subsp. sativus] 2.7e-42	gi|848893133|ref|XM_012991163.1| PREDICTED: Erythranthe guttatus ubiquitin-conjugating enzyme E2 32 (LOC105966592), mRNA 4.20103e-38	-	sp|Q9LVE0|PTR33_ARATH Protein NRT1/ PTR FAMILY 6.4 OS=Arabidopsis thaliana GN=NPF6.4 PE=1 SV=1 5.35457e-30	tr|A0A058ZZJ5|A0A058ZZJ5_EUCGR Uncharacterized protein OS=Eucalyptus grandis GN=EUGRSUZ_K00766 PE=4 SV=1 1.1e-35	GO:0005215, transporter activity;GO:0015293, symporter activity;GO:0016021, integral component of membrane;GO:0042128, nitrate assimilation	-
TRINITY_DN96485_c1_g1	14.6483705333	122.49797	-3.06394574644	0.00156621584592	0.028907076925499996	down	cd05472, cnd41_like, Chloroplast Nucleoids DNA-binding Protease, catalyzes the degradation of ribulose-1,5-bisphosphate carboxylase/oxygenase. Chloroplast Nucleoids DNA-binding Protease catalyzes the degradation of ribulose-1,5-bisphosphate carboxylase/oxygenase (Rubisco) in senescent leaves of tobacco. Antisense tobacco with reduced amount of CND41 maintained green leaves and constant protein le…	KOG1339, KOG1339, KOG1339, Aspartyl protease [Posttranslational modification, protein turnover, chaperones]. 1.00611e-43	gi|1021050232|gb|KZN08010.1| hypothetical protein DCAR_000679 [Daucus carota subsp. sativus] 2.9e-109	-	pfam14543, TAXi_N, Xylanase inhibitor N-terminal. The N- and C-termini of the members of this family are jointly necessary for creating the catalytic pocket necessary for cleaving xylanase. Phytopathogens produce xylanase that destroys plant cells, so its destruction through proteolysis is vital for plant-survival. 6.57127e-08	sp|Q8S9J6|ASPA_ARATH Aspartyl protease family protein At5g10770 OS=Arabidopsis thaliana GN=At5g10770 PE=2 SV=1 1.30512e-98	tr|A0A022Q0F4|A0A022Q0F4_ERYGU Uncharacterized protein OS=Erythranthe guttata GN=MIMGU_mgv1a005281mg PE=3 SV=1 1.2e-91	GO:0004190, aspartic-type endopeptidase activity;GO:0005886, plasma membrane;GO:0006508, proteolysis;GO:0030163, protein catabolic process;GO:0031225, anchored component of membrane	-
TRINITY_DN97121_c1_g3	1.83235	12.0228696667	-2.7140142791	0.0014137671148599998	0.027210094956999997	down	pfam02364, Glucan_synthase, 1,3-beta-glucan synthase component. This family consists of various 1,3-beta-glucan synthase components including Gls1, Gls2 and Gls3 from yeast. 1,3-beta-glucan synthase EC:2.4.1.34 also known as callose synthase catalyzes the formation of a beta-1,3-glucan polymer that is a major component of the fungal cell wall. The reaction catalyzed is:- UDP-glucose + {(1,3)-beta…	KOG0916, KOG0916, KOG0916, 1,3-beta-glucan synthase/callose synthase catalytic subunit [Cell wall/membrane/envelope biogenesis]. 8.99706e-170	gi|1000981336|ref|XP_015584609.1| PREDICTED: callose synthase 1 isoform X1 [Ricinus communis] 8.2e-170	gi|747044041|ref|XM_011088701.1| PREDICTED: Sesamum indicum callose synthase 1 (LOC105168545), transcript variant X4, mRNA 0.0	pfam02364, Glucan_synthase, 1,3-beta-glucan synthase component. This family consists of various 1,3-beta-glucan synthase components including Gls1, Gls2 and Gls3 from yeast. 1,3-beta-glucan synthase EC:2.4.1.34 also known as callose synthase catalyzes the formation of a beta-1,3-glucan polymer that is a major component of the fungal cell wall. The reaction catalyzed is:- UDP-glucose + {(1,3)-beta…	sp|Q9LXT9|CALS3_ARATH Callose synthase 3 OS=Arabidopsis thaliana GN=CALS3 PE=2 SV=3 0.0	tr|B9REL3|B9REL3_RICCO Putative uncharacterized protein OS=Ricinus communis GN=RCOM_1773310 PE=4 SV=1 6.2e-170	GO:0000148, 1,3-beta-D-glucan synthase complex;GO:0003843, 1,3-beta-D-glucan synthase activity;GO:0006075, (1->3)-beta-D-glucan biosynthetic process;GO:0008360, regulation of cell shape;GO:0016021, integral component of membrane;GO:0071555, cell wall organization	-
TRINITY_DN78933_c1_g5	352.905523567	51.090394599999996	2.78815802726	3.75711050315e-06	0.0005956702615110001	up	smart00332, PP2Cc, Serine/threonine phosphatases, family 2C, catalytic domain. The protein architecture and deduced catalytic mechanism of PP2C phosphatases are similar to the PP1, PP2A, PP2B family of protein Ser/Thr phosphatases, with which PP2C shares no sequence similarity. 5.7334e-41	KOG0698, KOG0698, KOG0698, Serine/threonine protein phosphatase [Signal transduction mechanisms]. 4.63756e-54	gi|1021048746|gb|KZN06526.1| hypothetical protein DCAR_007363 [Daucus carota subsp. sativus] 1.8e-131	-	pfam00481, PP2C, Protein phosphatase 2C. Protein phosphatase 2C is a Mn++ or Mg++ dependent protein serine/threonine phosphatase. 1.29095e-31	sp|Q8RX37|P2C02_ARATH Probable protein phosphatase 2C 2 OS=Arabidopsis thaliana GN=At1g07160 PE=2 SV=1 1.87789e-99	tr|A0A068ULB1|A0A068ULB1_COFCA Uncharacterized protein OS=Coffea canephora GN=GSCOC_T00028442001 PE=4 SV=1 9.4e-96	GO:0004722, protein serine/threonine phosphatase activity;GO:0046872, metal ion binding	-
TRINITY_DN82429_c0_g2	47.2356326667	3.2393389999999997	3.8661042209599996	0.0009727160159310001	0.0217234246641	up	COG1813, COG1813, Predicted transcription factor, homolog of eukaryotic MBF1 [Transcription]. 3.56669e-06	KOG3398, KOG3398, KOG3398, Transcription factor MBF1 [Transcription]. 1.99632e-29	gi|1021036732|gb|KZM94515.1| hypothetical protein DCAR_017758 [Daucus carota subsp. sativus] 9.4e-57	gi|19225064|gb|AF439278.2| Retama raetam ethylene-responsive transciptional coactivator-like protein (ERT) mRNA, complete cds 9.45264e-55	pfam08523, MBF1, Multiprotein bridging factor 1. This domain is found in the multiprotein bridging factor 1 (MBF1) which forms a heterodimer with MBF2. It has been shown to make direct contact with the TATA-box binding protein (TBP) and interacts with Ftz-F1, stabilizing the Ftz-F1-DNA complex. It is also found in the endothelial differentiation-related factor (EDF-1). Human EDF-1 is involved in …	sp|Q9LV58|MBF1C_ARATH Multiprotein-bridging factor 1c OS=Arabidopsis thaliana GN=MBF1C PE=1 SV=1 3.03283e-54	tr|A0A0D2SNV8|A0A0D2SNV8_GOSRA Uncharacterized protein OS=Gossypium raimondii GN=B456_010G069500 PE=4 SV=1 9.1e-44	GO:0003700, DNA binding transcription factor activity;GO:0003713, transcription coactivator activity;GO:0005730, nucleolus;GO:0005737, cytoplasm;GO:0006351, transcription, DNA-templated;GO:0009408, response to heat;GO:0009414, response to water deprivation;GO:0009737, response to abscisic acid;GO:0009873, ethylene-activated signaling pathway;GO:0043565, sequence-specific DNA binding;GO:0045893, p…	-
TRINITY_DN92812_c2_g1	6.5934800000000005	0.639148666667	3.36681666448	0.0032012045622	0.044111295024800004	up	-	-	-	-	-	-	-	-	-
TRINITY_DN74600_c2_g5	5.75073466667	0.457599333333	3.65158941931	0.00341384201178	0.045722254754400005	up	-	-	-	-	-	-	-	-	-
TRINITY_DN77939_c1_g4	54.5205666667	0.910779333333	5.903555191460001	2.6209642074e-09	2.12812465025e-06	up	-	-	-	-	-	-	-	-	-
TRINITY_DN91188_c0_g2	0.23403426666700003	24.95060818	-6.73621139118	1.04826243338e-09	1.01629825202e-06	down	PRK13558, PRK13558, bacterio-opsin activator; Provisional. 5.53242e-29	KOG0501, KOG0501, KOG0501, K+-channel KCNQ [Inorganic ion transport and metabolism]. 4.78147e-14	gi|1001012464|gb|AML76703.1| putative LOV domain-containing protein [Heracleum maximum] 4.9e-239	gi|1001017072|gb|KU701121.1| Angelica archangelica isolate TQKZ_2009359 putative LOV domain-containing protein mRNA, complete cds 0.0	pfam13426, PAS_9, PAS domain. 1.89677e-09	sp|O48963|PHOT1_ARATH Phototropin-1 OS=Arabidopsis thaliana GN=PHOT1 PE=1 SV=1 5.51132e-152	tr|A0A126WVS3|A0A126WVS3_HERMX Putative LOV domain-containing protein OS=Heracleum maximum PE=2 SV=1 3.7e-239	GO:0000155, phosphorelay sensor kinase activity;GO:0004672, protein kinase activity;GO:0004674, protein serine/threonine kinase activity;GO:0005524, ATP binding;GO:0005622, intracellular;GO:0005634, nucleus;GO:0005737, cytoplasm;GO:0005773, vacuole;GO:0007623, circadian rhythm;GO:0009637, response to blue light;GO:0009638, phototropism;GO:0009882, blue light photoreceptor activity;GO:0009898, cyt…	-
TRINITY_DN84691_c3_g2	29.693545500000003	1.89604733333	3.9690824802599995	5.38660259156e-06	0.000762304018605	up	-	-	-	-	-	-	-	-	-
TRINITY_DN92734_c1_g2	0.541226333333	8.09731333333	-3.9031393647099994	0.0012812344425799998	0.025584121022700003	down	-	-	gi|952977893|gb|ALO23114.1| cytochrome P450 CYP72A398 [Kalopanax septemlobus] 1.1e-14	-	-	sp|H2DH21|C7A29_PANGI Cytochrome P450 CYP72A219 OS=Panax ginseng PE=2 SV=1 2.46617e-17	tr|A0A0S2IHT1|A0A0S2IHT1_9APIA Cytochrome P450 CYP72A398 OS=Kalopanax septemlobus PE=2 SV=1 8.2e-15	GO:0004497, monooxygenase activity;GO:0005506, iron ion binding;GO:0016021, integral component of membrane;GO:0016705, oxidoreductase activity, acting on paired donors, with incorporation or reduction of molecular oxygen;GO:0020037, heme binding	-
TRINITY_DN96498_c1_g1	24.734745333299998	1.218844	4.34295365355	0.00377490844522	0.0483451746219	up	-	-	-	-	-	-	-	-	-
TRINITY_DN97206_c1_g2	1977.52021367	74.3015076667	4.734157146309999	3.90425239992e-11	5.897872631209999e-08	up	-	-	gi|255574484|ref|XP_002528154.1| PREDICTED: uncharacterized protein LOC8267564 [Ricinus communis] 6.0e-12	-	-	-	tr|B9SQ85|B9SQ85_RICCO Putative uncharacterized protein OS=Ricinus communis GN=RCOM_1196300 PE=4 SV=1 4.5e-12	-	-
TRINITY_DN83709_c1_g2	1.5958126666699999	23.0747666667	-3.85395285149	0.000312467433685	0.0111926458986	down	-	-	gi|1021049575|gb|KZN07355.1| hypothetical protein DCAR_008192 [Daucus carota subsp. sativus] 3.2e-45	gi|747089871|ref|XM_011094290.1| PREDICTED: Sesamum indicum topless-related protein 1-like (LOC105172731), transcript variant X3, mRNA 5.19246e-76	-	sp|Q0J7U6|TPR2_ORYSJ Protein TPR2 OS=Oryza sativa subsp. japonica GN=TPR2 PE=1 SV=1 6.25613e-50	tr|A0A067E670|A0A067E670_CITSI Uncharacterized protein (Fragment) OS=Citrus sinensis GN=CISIN_1g0011592mg PE=4 SV=1 3.8e-43	GO:0005634, nucleus;GO:0006351, transcription, DNA-templated;GO:0006355, regulation of transcription, DNA-templated	-
TRINITY_DN98744_c0_g4	0.29540900000000003	27.8399	-6.5582964386	2.74036992967e-05	0.00240874437783	down	PLN02307, PLN02307, phosphoglucomutase. 1.28638e-23	KOG0625, KOG0625, KOG0625, Phosphoglucomutase [Carbohydrate transport and metabolism]. 2.15912e-16	gi|1021028670|gb|KZM86455.1| hypothetical protein DCAR_023589 [Daucus carota subsp. sativus] 7.7e-31	gi|694320673|ref|XM_009353243.1| PREDICTED: Pyrus x bretschneideri phosphoglucomutase, cytoplasmic (LOC103943049), mRNA 2.01128e-19	-	sp|Q9M4G4|PGMC_SOLTU Phosphoglucomutase, cytoplasmic OS=Solanum tuberosum GN=PGM1 PE=2 SV=1 4.50089e-32	tr|A0A022QS43|A0A022QS43_ERYGU Uncharacterized protein OS=Erythranthe guttata GN=MIMGU_mgv1a003482mg PE=3 SV=1 3.6e-28	GO:0000287, magnesium ion binding;GO:0004614, phosphoglucomutase activity;GO:0005737, cytoplasm;GO:0005975, carbohydrate metabolic process;GO:0006006, glucose metabolic process;GO:0016868, intramolecular transferase activity, phosphotransferases	-
TRINITY_DN72269_c0_g3	9.35149666667	1.9017939999999998	2.29783629689	0.00174627493212	0.0308325036058	up	PLN02586, PLN02586, probable cinnamyl alcohol dehydrogenase. 2.26278e-41	KOG0023, KOG0023, KOG0023, Alcohol dehydrogenase, class V [Secondary metabolites biosynthesis, transport and catabolism]. 3.3189e-24	gi|1021023710|gb|KZM81498.1| hypothetical protein DCAR_029111 [Daucus carota subsp. sativus] 1.9e-41	-	-	sp|P42754|MTDH_PETCR Mannitol dehydrogenase (Fragment) OS=Petroselinum crispum GN=ELI3 PE=2 SV=1 2.34931e-51	tr|B6DMH0|B6DMH0_PANGI Cinnamyl alcohol dehydrogenase (Fragment) OS=Panax ginseng PE=2 SV=1 1.1e-38	GO:0008270, zinc ion binding;GO:0016491, oxidoreductase activity;GO:0046029, mannitol dehydrogenase activity	-
TRINITY_DN86884_c2_g2	22.5952653333	5.7110333333300005	1.9841967882499998	0.0032193111453200003	0.0442177495813	up	-	-	-	-	-	-	-	-	-
TRINITY_DN98460_c3_g1	0.333757866667	16.4764066667	-5.62545598829	0.000521739315789	0.015049121108200001	down	-	-	gi|1021030391|gb|KZM88176.1| hypothetical protein DCAR_025251 [Daucus carota subsp. sativus] 1.3e-36	-	-	-	tr|F6I6D0|F6I6D0_VITVI Putative uncharacterized protein OS=Vitis vinifera GN=VIT_15s0046g00740 PE=4 SV=1 4.0e-17	-	-
TRINITY_DN96600_c2_g2	0.48884633333300004	6.528345	-3.73926436387	0.000551142411557	0.015602127019400001	down	pfam04053, Coatomer_WDAD, Coatomer WD associated region. This region is composed of WD40 repeats. 2.92001e-56	KOG0292, KOG0292, KOG0292, Vesicle coat complex COPI, alpha subunit [Intracellular trafficking, secretion, and vesicular transport]. 0.0	gi|1021051116|gb|KZN08894.1| hypothetical protein DCAR_001550 [Daucus carota subsp. sativus] 0.0e+00	gi|802564023|ref|XM_012211807.1| PREDICTED: Jatropha curcas coatomer subunit alpha-1 (LOC105630107), transcript variant X2, mRNA 0.0	pfam04053, Coatomer_WDAD, Coatomer WD associated region. This region is composed of WD40 repeats. 6.97614e-57	sp|Q94A40|COPA1_ARATH Coatomer subunit alpha-1 OS=Arabidopsis thaliana GN=At1g62020 PE=2 SV=2 0.0	tr|A0A067EE43|A0A067EE43_CITSI Uncharacterized protein OS=Citrus sinensis GN=CISIN_1g000933mg PE=4 SV=1 0.0e+00	GO:0005198, structural molecule activity;GO:0005829, cytosol;GO:0005886, plasma membrane;GO:0006886, intracellular protein transport;GO:0006888, ER to Golgi vesicle-mediated transport;GO:0006890, retrograde vesicle-mediated transport, Golgi to ER;GO:0006891, intra-Golgi vesicle-mediated transport;GO:0016020, membrane;GO:0016192, vesicle-mediated transport;GO:0030126, COPI vesicle coat	-
TRINITY_DN96288_c1_g1	46.6557360667	9.99173973333	2.22324666045	0.0008777842227010002	0.0205913577399	up	pfam12023, DUF3511, Domain of unknown function (DUF3511). This presumed domain is functionally uncharacterized. This domain is found in eukaryotes. This domain is about 50 amino acids in length. This domain has two completely conserved residues (Y and K) that may be functionally important. 1.72638e-07	-	gi|1021035107|gb|KZM92890.1| hypothetical protein DCAR_016135 [Daucus carota subsp. sativus] 2.8e-11	-	pfam12023, DUF3511, Domain of unknown function (DUF3511). This presumed domain is functionally uncharacterized. This domain is found in eukaryotes. This domain is about 50 amino acids in length. This domain has two completely conserved residues (Y and K) that may be functionally important. 4.12447e-08	-	tr|A0A0D6QVL9|A0A0D6QVL9_ARACU Uncharacterized protein OS=Araucaria cunninghamii PE=4 SV=1 2.2e-08	-	-
TRINITY_DN79507_c1_g5	0.428504666667	8.22669666667	-4.26293042836	2.45974711553e-06	0.000436399111937	down	cd12686, RRM1_PTBPH1_PTBPH2, RNA recognition motif 1 in plant polypyrimidine tract-binding protein homolog 1 and 2 (PTBPH1 and PTBPH2). This subfamily corresponds to the RRM1 of PTBPH1 and PTBPH2. Although their biological roles remain unclear, PTBPH1 and PTBPH2 show significant sequence similarity to polypyrimidine tract binding protein (PTB) that is an important negative regulator of alternativ…	KOG1190, KOG1190, KOG1190, Polypyrimidine tract-binding protein [RNA processing and modification]. 1.51476e-24	gi|976905048|gb|KVH92697.1| Nucleotide-binding, alpha-beta plait, partial [Cynara cardunculus var. scolymus] 3.3e-71	gi|823167264|ref|XM_012628126.1| PREDICTED: Gossypium raimondii polypyrimidine tract-binding protein homolog 1-like (LOC105798164), transcript variant X3, mRNA 1.25365e-71	pfam14259, RRM_6, RNA recognition motif (a.k.a. RRM, RBD, or RNP domain). 2.10012e-06	sp|Q9MAC5|PTBP1_ARATH Polypyrimidine tract-binding protein homolog 1 OS=Arabidopsis thaliana GN=PTB PE=1 SV=1 6.32794e-76	tr|A0A118JVF8|A0A118JVF8_CYNCS Nucleotide-binding, alpha-beta plait (Fragment) OS=Cynara cardunculus var. scolymus GN=Ccrd_005266 PE=4 SV=1 2.5e-71	GO:0000166, nucleotide binding;GO:0000381, regulation of alternative mRNA splicing, via spliceosome;GO:0000932, P-body;GO:0003676, nucleic acid binding;GO:0003723, RNA binding;GO:0005634, nucleus;GO:0005737, cytoplasm;GO:0006397, mRNA processing;GO:0006417, regulation of translation;GO:0008380, RNA splicing;GO:0009845, seed germination;GO:0043484, regulation of RNA splicing	-
TRINITY_DN91233_c0_g1	6.857097	1.0822083333299999	2.66361967494	1.19239725675e-05	0.0013240093779	up	-	-	gi|1021040110|gb|KZM97891.1| hypothetical protein DCAR_014747 [Daucus carota subsp. sativus] 1.2e-64	-	-	-	tr|A0A022PU74|A0A022PU74_ERYGU Uncharacterized protein OS=Erythranthe guttata GN=MIMGU_mgv11b018278mg PE=4 SV=1 1.1e-20	GO:0016021, integral component of membrane	-
TRINITY_DN89800_c1_g4	6.15496	0.0001	15.909461860499999	0.0012134033764500001	0.024761440149400002	up	-	-	-	-	-	-	-	-	-
TRINITY_DN96644_c2_g2	183.90392366700002	40.171357666700004	2.1947131346599997	0.003183345371	0.04393853247819999	up	PLN00221, PLN00221, tubulin alpha chain; Provisional. 0.0	KOG1376, KOG1376, KOG1376, Alpha tubulin [Cytoskeleton]. 0.0	gi|590706185|ref|XP_007047652.1| Tubulin alpha-2 chain [Theobroma cacao] 7.2e-231	gi|1013854182|gb|KU234492.1| Apium graveolens alpha-tubulin mRNA, complete cds 0.0	pfam03953, Tubulin_C, Tubulin C-terminal domain. This family includes the tubulin alpha, beta and gamma chains. Members of this family are involved in polymer formation. Tubulins are GTPases. FtsZ can polymerize into tubes, sheets, and rings in vitro and is ubiquitous in eubacteria and archaea. Tubulin is the major component of microtubules. (The FtsZ GTPases have been split into their won family…	sp|P33629|TBA_PRUDU Tubulin alpha chain OS=Prunus dulcis GN=TUBA PE=2 SV=1 0.0	tr|A0A061DH83|A0A061DH83_THECC Tubulin alpha-2 chain OS=Theobroma cacao GN=TCM_000885 PE=3 SV=1 5.5e-231	GO:0003924, GTPase activity;GO:0005200, structural constituent of cytoskeleton;GO:0005525, GTP binding;GO:0005737, cytoplasm;GO:0005874, microtubule;GO:0007017, microtubule-based process	K07374-ko04145 Phagosome;ko04210 Apoptosis;ko04540 Gap junction
TRINITY_DN96644_c2_g3	74.2448146667	9.94966666667	2.8995701716799998	0.0005614283873200001	0.0157668412258	up	-	-	-	-	-	-	-	-	-
TRINITY_DN98178_c0_g1	1.1577076666700001	14.5613139	-3.65279763023	7.72072923461e-05	0.004735745126470001	down	PLN02209, PLN02209, serine carboxypeptidase. 5.82849e-58	KOG1282, KOG1282, KOG1282, Serine carboxypeptidases (lysosomal cathepsin A) [Amino acid transport and metabolism, Posttranslational modification, protein turnover, chaperones]. 3.69787e-45	gi|1009135228|ref|XP_015884874.1| PREDICTED: serine carboxypeptidase-like 7 [Ziziphus jujuba] 5.6e-59	-	pfam00450, Peptidase_S10, Serine carboxypeptidase. 1.00504e-43	sp|Q9CAU3|SCP2_ARATH Serine carboxypeptidase-like 2 OS=Arabidopsis thaliana GN=SCPL2 PE=2 SV=1 1.10746e-63	tr|A0A068TYE8|A0A068TYE8_COFCA Uncharacterized protein OS=Coffea canephora GN=GSCOC_T00034854001 PE=3 SV=1 3.6e-58	GO:0004180, carboxypeptidase activity;GO:0004185, serine-type carboxypeptidase activity;GO:0005576, extracellular region;GO:0016747, transferase activity, transferring acyl groups other than amino-acyl groups;GO:0019748, secondary metabolic process	-
TRINITY_DN75715_c0_g2	2048.69346133	620.308242	1.72364693605	0.00186858252591	0.032144600948299996	up	PLN02505, PLN02505, omega-6 fatty acid desaturase. 6.84827e-108	-	gi|1021041310|gb|KZM99091.1| hypothetical protein DCAR_013547 [Daucus carota subsp. sativus] 3.7e-98	gi|2501789|gb|U86072.1|PCU86072 Petroselinum crispum microsomal omega-6 fatty acid desaturase mRNA, complete cds 4.54468e-175	-	sp|P48631|FD6E2_SOYBN Omega-6 fatty acid desaturase, endoplasmic reticulum isozyme 2 OS=Glycine max GN=FAD2-2 PE=2 SV=1 2.33331e-108	tr|Q9FV88|Q9FV88_PETCR ELI7.5 OS=Petroselinum crispum GN=ELI7.5 PE=2 SV=1 5.3e-97	GO:0005789, endoplasmic reticulum membrane;GO:0006629, lipid metabolic process;GO:0006636, unsaturated fatty acid biosynthetic process;GO:0016021, integral component of membrane;GO:0016717, oxidoreductase activity, acting on paired donors, with oxidation of a pair of donors resulting in the reduction of molecular oxygen to two molecules of water	K10256-ko01040 Biosynthesis of unsaturated fatty acids;ko01212 Fatty acid metabolism
TRINITY_DN75715_c0_g4	8.92230666667	0.36514333333300003	4.6108819398500005	0.00032911311427399995	0.0115122243209	up	-	-	-	-	-	-	-	-	-
TRINITY_DN67132_c0_g1	2.25333666667	19.3811333333	-3.1045181513599998	0.00332681753731	0.045049007040099995	down	-	-	-	-	-	-	-	-	-
TRINITY_DN97019_c0_g1	15.6239333333	0.0001	17.2533981729	0.000884489434944	0.020681706344700002	up	-	-	-	-	-	-	-	-	-
TRINITY_DN90074_c2_g1	6.20081346667	0.9679766666670001	2.67941331439	0.00044806090418800004	0.013793692963700002	up	-	-	gi|1021028779|gb|KZM86564.1| hypothetical protein DCAR_023698 [Daucus carota subsp. sativus] 8.8e-21	-	-	-	-	-	-
TRINITY_DN80692_c0_g3	6.088273333330001	0.0001	15.8937455097	0.000424797163942	0.0133302170909	up	-	-	-	-	-	-	-	-	-
TRINITY_DN97505_c1_g1	42.656349	1.312785	5.02205792443	0.0016793494736400002	0.0301512296551	up	-	-	gi|985446260|ref|XP_015385238.1| PREDICTED: uncharacterized protein LOC107176793 [Citrus sinensis] 1.6e-23	-	-	-	tr|B9S8Y3|B9S8Y3_RICCO Nucleic acid binding protein, putative OS=Ricinus communis GN=RCOM_0836990 PE=4 SV=1 2.5e-21	GO:0003676, nucleic acid binding	-
TRINITY_DN97505_c1_g3	5.4664966666699994	0.156906333333	5.122641052790001	0.00022232444306099998	0.009071312090389999	up	-	-	-	-	-	-	-	-	-
TRINITY_DN67982_c1_g2	13.841651	121.041908	-3.12841869458	0.000800027665304	0.0195146064796	down	PLN00116, PLN00116, translation elongation factor EF-2 subunit; Provisional. 0.0	KOG0469, KOG0469, KOG0469, Elongation factor 2 [Translation, ribosomal structure and biogenesis]. 1.50607e-152	gi|1021035798|gb|KZM93581.1| hypothetical protein DCAR_016826 [Daucus carota subsp. sativus] 6.2e-187	gi|823130571|ref|XM_012598246.1| PREDICTED: Gossypium raimondii elongation factor 2 (LOC105775762), mRNA 0.0	pfam00009, GTP_EFTU, Elongation factor Tu GTP binding domain. This domain contains a P-loop motif, also found in several other families such as pfam00071, pfam00025 and pfam00063. Elongation factor Tu consists of three structural domains, this plus two C-terminal beta barrel domains. 2.47524e-30	sp|Q9ASR1|EF2_ARATH Elongation factor 2 OS=Arabidopsis thaliana GN=LOS1 PE=1 SV=1 0.0	tr|A0A0A0KC17|A0A0A0KC17_CUCSA Uncharacterized protein OS=Cucumis sativus GN=Csa_6G176410 PE=4 SV=1 1.0e-181	GO:0003746, translation elongation factor activity;GO:0003924, GTPase activity;GO:0005507, copper ion binding;GO:0005525, GTP binding;GO:0005730, nucleolus;GO:0005774, vacuolar membrane;GO:0005829, cytosol;GO:0005886, plasma membrane;GO:0006412, translation;GO:0009409, response to cold;GO:0009506, plasmodesma;GO:0009507, chloroplast;GO:0009631, cold acclimation;GO:0009735, response to cytokinin;G…	K03234-ko04921 Oxytocin signaling pathway;ko04152 AMPK signaling pathway
TRINITY_DN67982_c1_g3	20.502729666700002	222.463930667	-3.4396835394	0.000125270332788	0.006299371632909999	down	PLN00116, PLN00116, translation elongation factor EF-2 subunit; Provisional. 1.89894e-68	KOG0469, KOG0469, KOG0469, Elongation factor 2 [Translation, ribosomal structure and biogenesis]. 1.44482e-49	gi|1021035798|gb|KZM93581.1| hypothetical protein DCAR_016826 [Daucus carota subsp. sativus] 6.7e-60	gi|558633442|gb|KC572083.1| Hevea brasiliensis eukaryotic translation elongation factor mRNA, complete cds 5.90995e-107	-	sp|O23755|EF2_BETVU Elongation factor 2 OS=Beta vulgaris PE=2 SV=1 6.95723e-72	tr|A0A067E7S5|A0A067E7S5_CITSI Uncharacterized protein OS=Citrus sinensis GN=CISIN_1g003169mg PE=4 SV=1 1.6e-58	GO:0003746, translation elongation factor activity;GO:0003924, GTPase activity;GO:0005525, GTP binding;GO:0005737, cytoplasm	-
TRINITY_DN70342_c1_g1	48.1350338667	4.96077633333	3.2784494884099997	2.23906822497e-09	1.93924206253e-06	up	cd14664, STK_BAK1_like, Catalytic domain of the Serine/Threonine Kinase, BRI1 associated kinase 1 and related STKs. STKs catalyze the transfer of the gamma-phosphoryl group from ATP to serine/threonine residues on protein substrates. This subfamily includes three leucine-rich repeat receptor-like kinases (LRR-RLKs): Arabidopsis thaliana BAK1 and CLAVATA1 (CLV1), and Physcomitrella patens CLL1B cl…	KOG1187, KOG1187, KOG1187, Serine/threonine protein kinase [Signal transduction mechanisms]. 2.38873e-54	gi|747099232|ref|XP_011097664.1| PREDICTED: putative serine/threonine-protein kinase isoform X1 [Sesamum indicum] 4.9e-84	gi|727607352|ref|XM_010478478.1| PREDICTED: Camelina sativa putative serine/threonine-protein kinase (LOC104755986), transcript variant X2, mRNA 1.00761e-25	pfam07714, Pkinase_Tyr, Protein tyrosine kinase. 5.40996e-15	sp|P85193|PK01_HELAN Putative serine/threonine-protein kinase (Fragment) OS=Helianthus annuus PE=1 SV=1 7.23947e-61	tr|A0A067EE14|A0A067EE14_CITSI Uncharacterized protein OS=Citrus sinensis GN=CISIN_1g016347mg PE=3 SV=1 1.4e-83	GO:0004674, protein serine/threonine kinase activity;GO:0005524, ATP binding	-
TRINITY_DN70922_c4_g3	2058.3917	243.780776667	3.07786127302	0.00027333153042	0.010345343637200001	up	smart01037, Bet_v_1, Pathogenesis-related protein Bet v I family. This family is named after Bet v 1, the major birch pollen allergen. This protein belongs to family 10 of plant pathogenesis-related proteins (PR-10), cytoplasmic proteins of 15-17 kd that are wide-spread among dicotyledonous plants. In recent years, a number of diverse plant proteins with low sequence similarity to Bet v 1 was ide…	-	gi|848912447|ref|XP_012854468.1| PREDICTED: kirola-like [Erythranthe guttata] 3.9e-09	-	pfam00407, Bet_v_1, Pathogenesis-related protein Bet v I family. This family is named after Bet v 1, the major birch pollen allergen. This protein belongs to family 10 of plant pathogenesis-related proteins (PR-10), cytoplasmic proteins of 15-17 kd that are wide-spread among dicotyledonous plants. In recent years, a number of diverse plant proteins with low sequence similarity to Bet v 1 was iden…	sp|P85524|KIRO_ACTDE Kirola OS=Actinidia deliciosa PE=1 SV=1 5.76189e-11	tr|A0A022QW60|A0A022QW60_ERYGU Uncharacterized protein (Fragment) OS=Erythranthe guttata GN=MIMGU_mgv1a021736mg PE=4 SV=1 3.0e-09	GO:0006952, defense response;GO:0009607, response to biotic stimulus;GO:0016068, type I hypersensitivity	-
TRINITY_DN75945_c0_g1	95.3242333333	18.8810533333	2.335903771	0.0012561720181099999	0.0252551335029	up	smart00504, Ubox, Modified RING finger domain. Modified RING finger domain, without the full complement of Zn2+-binding ligands. Probable involvement in E2-dependent ubiquitination. 1.50853e-17	KOG4642, KOG4642, KOG4642, Chaperone-dependent E3 ubiquitin protein ligase (contains TPR repeats) [Posttranslational modification, protein turnover, chaperones]. 5.90055e-08	gi|1021035887|gb|KZM93670.1| hypothetical protein DCAR_016915 [Daucus carota subsp. sativus] 5.3e-193	-	pfam04564, U-box, U-box domain. This domain is related to the Ring finger pfam00097 but lacks the zinc binding residues. 7.30048e-13	sp|Q84TG3|PUB23_ARATH E3 ubiquitin-protein ligase PUB23 OS=Arabidopsis thaliana GN=PUB23 PE=1 SV=1 4.15022e-170	tr|B9P691|B9P691_POPTR U-box domain-containing family protein OS=Populus trichocarpa GN=POPTR_0006s21910g PE=4 SV=1 2.2e-151	GO:0004842, ubiquitin-protein transferase activity;GO:0005829, cytosol;GO:0006952, defense response;GO:0009414, response to water deprivation;GO:0010200, response to chitin;GO:0016567, protein ubiquitination;GO:0016874, ligase activity;GO:0051865, protein autoubiquitination	-
TRINITY_DN70233_c4_g4	232.255666667	52.6990333333	2.13986539285	0.000685706606852	0.0177952233565	up	pfam04833, COBRA, COBRA-like protein. Family of plant proteins are designated COBRA-like (COBL) proteins. The 12 Arabidopsis members of the family are all GPI-liked. Some members of this family are annotated as phytochelatin synthase, but these annotations are incorrect. 4.00484e-29	-	gi|1021025131|gb|KZM82919.1| hypothetical protein DCAR_030488 [Daucus carota subsp. sativus] 2.3e-176	gi|590661586|ref|XM_007035653.1| Theobroma cacao COBRA-like protein-7 precursor (TCM_021301) mRNA, complete cds 1.23957e-123	pfam04833, COBRA, COBRA-like protein. Family of plant proteins are designated COBRA-like (COBL) proteins. The 12 Arabidopsis members of the family are all GPI-liked. Some members of this family are annotated as phytochelatin synthase, but these annotations are incorrect. 9.56789e-30	sp|Q8GZ17|COBL7_ARATH COBRA-like protein 7 OS=Arabidopsis thaliana GN=COBL7 PE=1 SV=2 9.29316e-160	tr|A0A0V0IN10|A0A0V0IN10_SOLCH Putative COBRA-like protein 7-like OS=Solanum chacoense PE=4 SV=1 2.5e-151	GO:0005768, endosome;GO:0005794, Golgi apparatus;GO:0005802, trans-Golgi network;GO:0009506, plasmodesma;GO:0010215, cellulose microfibril organization;GO:0016021, integral component of membrane;GO:0016049, cell growth;GO:0031225, anchored component of membrane;GO:0046658, anchored component of plasma membrane	-
TRINITY_DN78222_c0_g4	153.73483333299998	10.9526266667	3.81109528422	0.00024314821944599997	0.009572229630639998	up	cd02176, GH16_XET, Xyloglucan endotransglycosylase, member of glycosyl hydrolase family 16. Xyloglucan endotransglycosylases (XETs) cleave and religate xyloglucan polymers in plant cell walls via a transglycosylation mechanism. Xyloglucan is a soluble hemicellulose with a backbone of beta-1,4-linked glucose units, partially substituted with alpha-1,6-linked xylopyranose branches. It binds noncova…	-	gi|1021033650|gb|KZM91434.1| hypothetical protein DCAR_021201 [Daucus carota subsp. sativus] 3.8e-72	gi|985435714|ref|XM_006469681.2| PREDICTED: Citrus sinensis xyloglucan endotransglucosylase/hydrolase protein 9 (LOC102627322), mRNA 3.41405e-67	pfam00722, Glyco_hydro_16, Glycosyl hydrolases family 16. 4.15253e-08	sp|Q8LDW9|XTH9_ARATH Xyloglucan endotransglucosylase/hydrolase protein 9 OS=Arabidopsis thaliana GN=XTH9 PE=2 SV=2 1.9564e-61	tr|A0A0V0I9D5|A0A0V0I9D5_SOLCH Xyloglucan endotransglucosylase/hydrolase OS=Solanum chacoense PE=3 SV=1 5.2e-66	GO:0004553, hydrolase activity, hydrolyzing O-glycosyl compounds;GO:0005618, cell wall;GO:0010411, xyloglucan metabolic process;GO:0016762, xyloglucan:xyloglucosyl transferase activity;GO:0042546, cell wall biogenesis;GO:0048046, apoplast;GO:0071555, cell wall organization	-
TRINITY_DN78222_c0_g5	71.6567666667	12.272516666700001	2.54567182104	0.0005717209344249999	0.0159455889813	up	-	-	gi|1021038180|gb|KZM95963.1| hypothetical protein DCAR_019205 [Daucus carota subsp. sativus] 6.5e-14	-	-	sp|Q8LDW9|XTH9_ARATH Xyloglucan endotransglucosylase/hydrolase protein 9 OS=Arabidopsis thaliana GN=XTH9 PE=2 SV=2 2.67554e-06	tr|C0IRG2|C0IRG2_ACTER Xyloglucan endotransglucosylase/hydrolase OS=Actinidia eriantha PE=2 SV=1 2.0e-07	GO:0004553, hydrolase activity, hydrolyzing O-glycosyl compounds;GO:0005618, cell wall;GO:0010411, xyloglucan metabolic process;GO:0016762, xyloglucan:xyloglucosyl transferase activity;GO:0042546, cell wall biogenesis;GO:0048046, apoplast;GO:0071555, cell wall organization	-
TRINITY_DN89124_c1_g2	32.6083012667	3.355292	3.28072905568	0.00040671189250300003	0.012982203637	up	-	-	-	-	-	-	-	-	-
TRINITY_DN96334_c0_g3	0.472657	214.845774667	-8.82829206743	4.37657548825e-11	6.31753808867e-08	down	-	-	gi|1021035690|gb|KZM93473.1| hypothetical protein DCAR_016718 [Daucus carota subsp. sativus] 3.8e-06	-	-	-	-	-	-
TRINITY_DN82878_c2_g5	18.173251333299998	0.501970333333	5.1780706387999995	8.95720716269e-08	3.80283206318e-05	up	-	-	-	-	-	-	-	-	-
TRINITY_DN80766_c3_g2	18.389163	1.9037899333300001	3.27190961194	0.00285923480196	0.0412086343535	up	PLN02792, PLN02792, oxidoreductase. 5.23422e-06	-	gi|1021047640|gb|KZN05420.1| hypothetical protein DCAR_006257 [Daucus carota subsp. sativus] 2.7e-06	gi|922398109|ref|XM_013610763.1| Medicago truncatula multi-copper oxidase-like protein mRNA 6.06252e-15	-	-	tr|A0A103YDV5|A0A103YDV5_CYNCS Cupredoxin (Fragment) OS=Cynara cardunculus var. scolymus GN=Ccrd_014316 PE=4 SV=1 2.1e-06	GO:0005507, copper ion binding;GO:0016491, oxidoreductase activity	-
TRINITY_DN98336_c4_g1	2.17398106667	8.79096026667	-2.0156813885900005	0.000270772140473	0.010297743517999999	down	-	-	-	gi|147844862|emb|AM462591.2| Vitis vinifera contig VV79X002449.2, whole genome shotgun sequence 2.47893e-16	-	-	-	-	-
TRINITY_DN90701_c0_g4	0.5044427	6.203676000000001	-3.62036103356	0.000246894176887	0.009664718379509999	down	pfam00854, PTR2, POT family. The POT (proton-dependent oligopeptide transport) family all appear to be proton dependent transporters. 4.86083e-07	KOG1237, KOG1237, KOG1237, H+/oligopeptide symporter [Amino acid transport and metabolism]. 1.23419e-13	gi|1021054046|gb|KZN11824.1| hypothetical protein DCAR_004480 [Daucus carota subsp. sativus] 1.1e-37	-	pfam00854, PTR2, POT family. The POT (proton-dependent oligopeptide transport) family all appear to be proton dependent transporters. 1.16129e-07	sp|Q8LPL2|PTR32_ARATH Protein NRT1/ PTR FAMILY 1.1 OS=Arabidopsis thaliana GN=NPF1.1 PE=1 SV=2 2.81227e-26	tr|A0A068V6G6|A0A068V6G6_COFCA Uncharacterized protein OS=Coffea canephora GN=GSCOC_T00017283001 PE=4 SV=1 4.0e-24	GO:0005215, transporter activity;GO:0005886, plasma membrane;GO:0016021, integral component of membrane;GO:0080054, low-affinity nitrate transmembrane transporter activity	-
TRINITY_DN71543_c1_g2	0.644777533333	5.788785666669999	-3.1663873603900003	0.000917017041889	0.0211379261852	down	PLN02746, PLN02746, hydroxymethylglutaryl-CoA lyase. 1.50409e-23	KOG2368, KOG2368, KOG2368, Hydroxymethylglutaryl-CoA lyase [Energy production and conversion, Amino acid transport and metabolism]. 1.34618e-20	gi|1021035858|gb|KZM93641.1| hypothetical protein DCAR_016886 [Daucus carota subsp. sativus] 3.5e-32	gi|828300331|ref|XM_004493325.2| PREDICTED: Cicer arietinum hydroxymethylglutaryl-CoA lyase, mitochondrial-like (LOC101499028), mRNA 7.50365e-37	-	sp|O81027|HMGCL_ARATH Hydroxymethylglutaryl-CoA lyase, mitochondrial OS=Arabidopsis thaliana GN=HMGCL PE=1 SV=2 6.54952e-22	tr|A0A068VLX1|A0A068VLX1_COFCA Uncharacterized protein OS=Coffea canephora GN=GSCOC_T00000521001 PE=4 SV=1 2.5e-22	GO:0003824, catalytic activity;GO:0004419, hydroxymethylglutaryl-CoA lyase activity;GO:0005739, mitochondrion;GO:0005759, mitochondrial matrix;GO:0046872, metal ion binding	-
TRINITY_DN74545_c1_g2	0.525344666667	9.621765666669999	-4.19496550586	0.00032434982845300003	0.0114442106501	down	pfam00332, Glyco_hydro_17, Glycosyl hydrolases family 17. 1.30882e-39	-	gi|1021041165|gb|KZM98946.1| hypothetical protein DCAR_013692 [Daucus carota subsp. sativus] 5.7e-205	gi|764519641|ref|XM_011470424.1| PREDICTED: Fragaria vesca subsp. vesca glucan endo-1,3-beta-glucosidase 8-like (LOC101304328), transcript variant X2, mRNA 1.78422e-138	pfam00332, Glyco_hydro_17, Glycosyl hydrolases family 17. 3.12689e-40	sp|Q6NKW9|E138_ARATH Glucan endo-1,3-beta-glucosidase 8 OS=Arabidopsis thaliana GN=At1g64760 PE=1 SV=2 0.0	tr|A5BTD4|A5BTD4_VITVI Putative uncharacterized protein OS=Vitis vinifera GN=VIT_08s0007g07560 PE=3 SV=1 1.2e-165	GO:0004553, hydrolase activity, hydrolyzing O-glycosyl compounds;GO:0005576, extracellular region;GO:0005618, cell wall;GO:0005886, plasma membrane;GO:0005975, carbohydrate metabolic process;GO:0006952, defense response;GO:0009506, plasmodesma;GO:0030247, polysaccharide binding;GO:0031225, anchored component of membrane;GO:0042973, glucan endo-1,3-beta-D-glucosidase activity;GO:0046658, anchored …	-
TRINITY_DN73484_c0_g1	0.4245399	10.1553648667	-4.58019811361	0.00195631243451	0.0329554426371	down	PLN00103, PLN00103, isocitrate dehydrogenase (NADP+); Provisional. 1.0911e-06	-	gi|694382198|ref|XP_009367131.1| PREDICTED: isocitrate dehydrogenase [NADP] [Pyrus x bretschneideri] 2.7e-06	-	-	sp|P50217|IDHC_SOLTU Isocitrate dehydrogenase [NADP] OS=Solanum tuberosum GN=ICDH-1 PE=2 SV=1 1.72601e-06	tr|G3BMV7|G3BMV7_PYRPY Isocitrate dehydrogenase [NADP] OS=Pyrus pyrifolia PE=2 SV=1 2.1e-06	GO:0000287, magnesium ion binding;GO:0004450, isocitrate dehydrogenase (NADP+) activity;GO:0005737, cytoplasm;GO:0006097, glyoxylate cycle;GO:0006099, tricarboxylic acid cycle;GO:0006102, isocitrate metabolic process;GO:0051287, NAD binding	-
TRINITY_DN73064_c0_g1	12.426996	0.644826	4.268423867169999	0.00129685876504	0.0258246642552	up	-	-	-	-	-	-	-	-	-
TRINITY_DN98106_c5_g4	10.4865933333	1.19716966816	3.13084654424	0.00011249597264	0.00598763893483	up	-	-	-	-	-	-	-	-	-
TRINITY_DN98105_c1_g2	10.6163733333	0.45581366666699996	4.541703018430001	3.61839369766e-05	0.00291975154558	up	-	-	-	-	-	-	-	-	-
TRINITY_DN79386_c2_g1	28.77982	400.626119	-3.79912700732	0.00159417274833	0.029213531431400003	down	cd04216, Phytocyanin, Phytocyanins are plant blue or type I copper proteins. Phytocyanins are plant blue or type I copper proteins. They are involved in electron transfer reactions with the Cu center transitioning between the oxidized Cu(II) form and the reduced Cu(I) form. Phytocyanins are classified into four groups: stellacyanin, plantacyanin, uclacyanin and early nodulin groups. Stellacyanin …	-	gi|1021025516|gb|KZM83304.1| hypothetical protein DCAR_030873 [Daucus carota subsp. sativus] 1.8e-62	-	pfam02298, Cu_bind_like, Plastocyanin-like domain. This family represents a domain found in flowering plants related to the copper binding protein plastocyanin. Some members of this family may not bind copper due to the lack of key residues. 2.07613e-11	sp|P80728|MAVI_CUCPE Mavicyanin OS=Cucurbita pepo PE=1 SV=1 9.0732e-10	tr|B9HCF7|B9HCF7_POPTR Uncharacterized protein OS=Populus trichocarpa GN=POPTR_0006s01060g PE=4 SV=1 1.4e-27	GO:0009055, electron transfer activity;GO:0046658, anchored component of plasma membrane;GO:0046872, metal ion binding;GO:0055114, oxidation-reduction process	-
TRINITY_DN74712_c0_g1	3.34811766667	15.9879186667	-2.2555600025	0.0024884126047199995	0.037778188386499996	down	PRK09330, PRK09330, cell division protein FtsZ; Validated. 1.12104e-65	-	gi|1021034099|gb|KZM91883.1| hypothetical protein DCAR_020752 [Daucus carota subsp. sativus] 2.0e-132	gi|731400859|ref|XM_002282704.3| PREDICTED: Vitis vinifera cell division protein ftsZ homolog 2-1, chloroplastic-like (LOC100251032), mRNA 1.18163e-153	pfam00091, Tubulin, Tubulin/FtsZ family, GTPase domain. This family includes the tubulin alpha, beta and gamma chains, as well as the bacterial FtsZ family of proteins. Members of this family are involved in polymer formation. FtsZ is the polymer-forming protein of bacterial cell division. It is part of a ring in the middle of the dividing cell that is required for constriction of cell membrane a…	sp|O82533|FTZ21_ARATH Cell division protein FtsZ homolog 2-1, chloroplastic OS=Arabidopsis thaliana GN=FTSZ2-1 PE=1 SV=2 6.87805e-125	tr|A0A103XPN6|A0A103XPN6_CYNCS Basic-leucine zipper domain-containing protein OS=Cynara cardunculus var. scolymus GN=Ccrd_003363 PE=3 SV=1 2.1e-105	GO:0003700, DNA binding transcription factor activity;GO:0003924, GTPase activity;GO:0005525, GTP binding;GO:0005737, cytoplasm;GO:0009507, chloroplast;GO:0009534, chloroplast thylakoid;GO:0009535, chloroplast thylakoid membrane;GO:0009570, chloroplast stroma;GO:0010020, chloroplast fission;GO:0043565, sequence-specific DNA binding;GO:0043621, protein self-association	K03531-ko04112 Cell cycle - Caulobacter
TRINITY_DN69838_c2_g1	0.557230366667	8.859687699999999	-3.99091005944	0.000619666934746	0.0167763785545	down	cd13132, MATE_eukaryotic, Eukaryotic members of the multidrug and toxic compound extrusion (MATE) family. The integral membrane proteins from the MATE family are involved in exporting metabolites across the cell membrane and are responsible for multidrug resistance (MDR) in many bacteria and animals. MATE has also been identified as a large multigene family in plants, where the proteins are linke…	KOG1347, KOG1347, KOG1347, Uncharacterized membrane protein, predicted efflux pump [General function prediction only]. 7.67177e-42	gi|1021031038|gb|KZM88823.1| hypothetical protein DCAR_025898 [Daucus carota subsp. sativus] 1.1e-86	gi|923833925|ref|XM_013843076.1| PREDICTED: Brassica napus protein TRANSPARENT TESTA 12-like (LOC106402363), mRNA 4.19149e-17	-	sp|Q9C994|DTX14_ARATH Protein DETOXIFICATION 14 OS=Arabidopsis thaliana GN=DTX14 PE=3 SV=1 9.73676e-67	tr|M1D0L9|M1D0L9_SOLTU Protein DETOXIFICATION OS=Solanum tuberosum GN=PGSC0003DMG400030630 PE=3 SV=1 1.6e-63	GO:0005774, vacuolar membrane;GO:0006855, drug transmembrane transport;GO:0015238, drug transmembrane transporter activity;GO:0015297, antiporter activity;GO:0016021, integral component of membrane	-
TRINITY_DN98253_c1_g3	6.422781	0.5880696	3.4491392871099995	0.00203828075813	0.0336256767267	up	-	-	-	-	-	-	-	-	-
TRINITY_DN95064_c1_g4	0.197306433333	7.683422666669999	-5.28323921663	0.0013511959106500002	0.026500492985499998	down	PLN03112, PLN03112, cytochrome P450 family protein; Provisional. 9.22463e-17	KOG0156, KOG0156, KOG0156, Cytochrome P450 CYP2 subfamily [Secondary metabolites biosynthesis, transport and catabolism]. 2.39806e-12	gi|661891763|emb|CDP04688.1| unnamed protein product [Coffea canephora] 6.6e-40	-	-	sp|Q9FG65|C81D1_ARATH Cytochrome P450 81D1 OS=Arabidopsis thaliana GN=CYP81D1 PE=2 SV=1 3.43233e-39	tr|A0A068UAQ6|A0A068UAQ6_COFCA Uncharacterized protein OS=Coffea canephora GN=GSCOC_T00018745001 PE=3 SV=1 5.0e-40	GO:0004497, monooxygenase activity;GO:0005506, iron ion binding;GO:0016020, membrane;GO:0016021, integral component of membrane;GO:0016705, oxidoreductase activity, acting on paired donors, with incorporation or reduction of molecular oxygen;GO:0016709, oxidoreductase activity, acting on paired donors, with incorporation or reduction of molecular oxygen, NAD(P)H as one donor, and incorporation of…	-
TRINITY_DN88552_c0_g1	2.040613	62.41089479	-4.93472338797	8.27535563977e-05	0.00491227987937	down	PTZ00146, PTZ00146, fibrillarin; Provisional. 5.33991e-54	KOG1596, KOG1596, KOG1596, Fibrillarin and related nucleolar RNA-binding proteins [RNA processing and modification]. 1.31684e-54	gi|848925105|ref|XP_012858561.1| PREDICTED: mediator of RNA polymerase II transcription subunit 36a-like [Erythranthe guttata] 5.6e-50	-	pfam01269, Fibrillarin, Fibrillarin. 4.19315e-52	sp|Q9FEF8|MD36B_ARATH Probable mediator of RNA polymerase II transcription subunit 36b OS=Arabidopsis thaliana GN=MED36B PE=1 SV=1 5.05486e-56	tr|A0A022PUV8|A0A022PUV8_ERYGU Uncharacterized protein OS=Erythranthe guttata GN=MIMGU_mgv1a008219mg PE=3 SV=1 4.2e-50	GO:0000494, box C/D snoRNA 3'-end processing;GO:0003723, RNA binding;GO:0005730, nucleolus;GO:0006351, transcription, DNA-templated;GO:0006355, regulation of transcription, DNA-templated;GO:0006364, rRNA processing;GO:0008033, tRNA processing;GO:0008168, methyltransferase activity;GO:0008649, rRNA methyltransferase activity;GO:0015030, Cajal body;GO:0016020, membrane;GO:0030515, snoRNA binding;GO…	K14563-ko03008 Ribosome biogenesis in eukaryotes
TRINITY_DN97401_c1_g2	6.113579033330001	0.187064533333	5.03040925449	9.802125011899999e-05	0.00552156056368	up	pfam01407, Gemini_AL3, Geminivirus AL3 protein. Geminiviruses are small, ssDNA-containing plant viruses. Geminiviruses contain three ORFs (designated AL1, AL2, and AL3) that overlap and are specified by multiple polycistronic mRNAs. The AL3 protein comprises approximately 0.05% of the cellular proteins and is present in the soluble and organelle fractions. AL3 may form oligomers. Immunoprecipitat…	-	-	-	pfam01407, Gemini_AL3, Geminivirus AL3 protein. Geminiviruses are small, ssDNA-containing plant viruses. Geminiviruses contain three ORFs (designated AL1, AL2, and AL3) that overlap and are specified by multiple polycistronic mRNAs. The AL3 protein comprises approximately 0.05% of the cellular proteins and is present in the soluble and organelle fractions. AL3 may form oligomers. Immunoprecipitat…	sp|Q08590|REN_ICMV Replication enhancer protein OS=Indian cassava mosaic virus GN=AC3 PE=3 SV=1 1.11418e-31	tr|A0A103XIC7|A0A103XIC7_CYNCS Uncharacterized protein OS=Cynara cardunculus var. scolymus GN=Ccrd_006691 PE=4 SV=1 1.8e-29	GO:0016032, viral process	-
TRINITY_DN85146_c1_g3	0.24187866666700003	8.84093	-5.19184270186	3.2672258287e-06	0.000541400990191	down	PLN02669, PLN02669, xylulokinase. 5.11792e-115	KOG2531, KOG2531, KOG2531, Sugar (pentulose and hexulose) kinases [Carbohydrate transport and metabolism]. 8.43245e-91	gi|1021034813|gb|KZM92597.1| hypothetical protein DCAR_020038 [Daucus carota subsp. sativus] 1.6e-111	gi|1025211280|ref|XM_016624153.1| PREDICTED: Nicotiana tabacum xylulose kinase-like (LOC107800890), mRNA 4.53444e-115	-	sp|Q3SYZ6|XYLB_BOVIN Xylulose kinase OS=Bos taurus GN=XYLB PE=2 SV=1 2.5796e-79	tr|A0A0J8B661|A0A0J8B661_BETVU Uncharacterized protein OS=Beta vulgaris subsp. vulgaris GN=BVRB_008960 PE=4 SV=1 1.9e-96	GO:0004856, xylulokinase activity;GO:0005524, ATP binding;GO:0005737, cytoplasm;GO:0005975, carbohydrate metabolic process;GO:0005997, xylulose metabolic process;GO:0016773, phosphotransferase activity, alcohol group as acceptor;GO:0042732, D-xylose metabolic process;GO:0070062, extracellular exosome	K00854-ko00040 Pentose and glucuronate interconversions
TRINITY_DN95263_c0_g1	0.866284033333	7.6517465	-3.1428770464099998	0.00188624464065	0.0322518539413	down	PRK12391, PRK12391, tryptophan synthase subunit beta; Reviewed. 3.38595e-39	KOG1395, KOG1395, KOG1395, Tryptophan synthase beta chain [Amino acid transport and metabolism]. 1.26756e-12	gi|1021048908|gb|KZN06688.1| hypothetical protein DCAR_007525 [Daucus carota subsp. sativus] 3.2e-49	-	-	sp|Q8TL44|TRPB2_METAC Tryptophan synthase beta chain 2 OS=Methanosarcina acetivorans (strain ATCC 35395 / DSM 2834 / JCM 12185 / C2A) GN=trpB2 PE=3 SV=1 2.04781e-34	tr|B9SZR5|B9SZR5_RICCO Tryptophan synthase beta chain, putative OS=Ricinus communis GN=RCOM_1167780 PE=4 SV=1 6.8e-44	GO:0000162, tryptophan biosynthetic process;GO:0004834, tryptophan synthase activity;GO:0005737, cytoplasm;GO:0030170, pyridoxal phosphate binding;GO:0052684, L-serine hydro-lyase (adding indole, L-tryptophan-forming) activity	K06001-ko00260 Glycine, serine and threonine metabolism;ko01230 Biosynthesis of amino acids;ko00400 Phenylalanine, tyrosine and tryptophan biosynthesis
TRINITY_DN72261_c1_g1	4.02984593333	165.482982333	-5.35981436939	0.00191421282273	0.032533103696	down	-	-	-	-	-	-	-	-	-
TRINITY_DN97588_c1_g3	2.61293666667	22.407595	-3.10024375155	0.00066048301897	0.017348562661999998	down	-	-	gi|1021048840|gb|KZN06620.1| hypothetical protein DCAR_007457 [Daucus carota subsp. sativus] 3.3e-12	gi|802649590|ref|XM_012224561.1| PREDICTED: Jatropha curcas E3 ubiquitin-protein ligase RGLG2-like (LOC105640285), mRNA 2.79245e-13	-	sp|Q9LY87|RGLG2_ARATH E3 ubiquitin-protein ligase RGLG2 OS=Arabidopsis thaliana GN=RGLG2 PE=1 SV=1 2.74959e-11	tr|A0A0B0PYM1|A0A0B0PYM1_GOSAR E3 ubiquitin-protein ligase RGLG2 OS=Gossypium arboreum GN=F383_15259 PE=4 SV=1 4.3e-12	GO:0004842, ubiquitin-protein transferase activity;GO:0005634, nucleus;GO:0005886, plasma membrane;GO:0008270, zinc ion binding;GO:0009690, cytokinin metabolic process;GO:0009850, auxin metabolic process;GO:0016874, ligase activity;GO:0080148, negative regulation of response to water deprivation	-
TRINITY_DN74324_c3_g4	27.5577063333	0.237575333333	6.85792695165	1.88022688142e-06	0.00035711665946300004	up	-	-	-	-	-	-	-	-	-
TRINITY_DN76592_c1_g1	7.837341	0.770942	3.34567003796	5.12892769589e-05	0.00360172709559	up	cd05489, xylanase_inhibitor_I_like, TAXI-I inhibits degradation of xylan in the cell wall. Xylanase inhibitor-I (TAXI-I) is a member of potent TAXI-type inhibitors of fungal and bacterial family 11 xylanases. Plants developed a diverse battery of defense mechanisms in response to continual challenges by a broad spectrum of pathogenic microorganisms. Their defense arsenal includes inhibitors of ce…	KOG1339, KOG1339, KOG1339, Aspartyl protease [Posttranslational modification, protein turnover, chaperones]. 1.20122e-08	gi|1021029668|gb|KZM87453.1| hypothetical protein DCAR_024587 [Daucus carota subsp. sativus] 5.7e-187	-	pfam14541, TAXi_C, Xylanase inhibitor C-terminal. The N- and C-termini of the members of this family are jointly necessary for creating the catalytic pocket necessary for cleaving xylasnase. Phytopathogens produce xylanase that destroys plant cells, so its destruction through proteolysis is vital for plant-survival. 2.70628e-31	sp|Q8RVH5|7SBG2_SOYBN Basic 7S globulin 2 OS=Glycine max PE=1 SV=1 1.74769e-54	tr|A0A061EKI6|A0A061EKI6_THECC Eukaryotic aspartyl protease family protein, putative OS=Theobroma cacao GN=TCM_020524 PE=3 SV=1 8.2e-101	GO:0004190, aspartic-type endopeptidase activity;GO:0006508, proteolysis;GO:0030163, protein catabolic process;GO:0045735, nutrient reservoir activity	-
TRINITY_DN84528_c0_g2	27.6821186667	2.1999936666699997	3.6533830890400005	4.55873290979e-05	0.00338634220221	up	cd08301, alcohol_DH_plants, Plant alcohol dehydrogenase. NAD(P)(H)-dependent oxidoreductases are the major enzymes in the interconversion of alcohols and aldehydes or ketones. Alcohol dehydrogenase in the liver converts ethanol and NAD+ to acetaldehyde and NADH, while in yeast and some other microorganisms ADH catalyzes the conversion acetaldehyde to ethanol in alcoholic fermentation. There are 7…	KOG0022, KOG0022, KOG0022, Alcohol dehydrogenase, class III [Secondary metabolites biosynthesis, transport and catabolism]. 1.14058e-36	gi|566255504|ref|XP_006387823.1| hypothetical protein POPTR_0542s00210g [Populus trichocarpa] 3.9e-30	gi|848934048|ref|XM_012974146.1| PREDICTED: Erythranthe guttatus alcohol dehydrogenase 3-like (LOC105950780), mRNA 6.68508e-25	-	sp|P14674|ADH2_SOLTU Alcohol dehydrogenase 2 OS=Solanum tuberosum GN=ADH2 PE=2 SV=1 7.2426e-60	tr|U7DX94|U7DX94_POPTR Uncharacterized protein OS=Populus trichocarpa GN=POPTR_0542s00210g PE=3 SV=1 3.0e-30	GO:0004022, alcohol dehydrogenase (NAD) activity;GO:0005737, cytoplasm;GO:0008270, zinc ion binding;GO:0016491, oxidoreductase activity	-
TRINITY_DN65373_c0_g1	33.5002963333	1.98628333778	4.0760305181800005	1.33422011307e-05	0.0014348830444500002	up	-	-	gi|1021048600|gb|KZN06380.1| hypothetical protein DCAR_007217 [Daucus carota subsp. sativus] 4.4e-06	-	-	-	-	-	-
TRINITY_DN80836_c1_g2	6.596076666669999	0.126281	5.70689867202	8.49693534349e-05	0.00499037458506	up	-	-	-	-	-	-	-	-	-
TRINITY_DN64398_c0_g1	17.85651	1.0112743333299998	4.142203815309999	1.55228024537e-06	0.00031314120465499994	up	PLN02399, PLN02399, phospholipid hydroperoxide glutathione peroxidase. 3.59382e-07	-	gi|1021049786|gb|KZN07566.1| hypothetical protein DCAR_008403 [Daucus carota subsp. sativus] 2.3e-07	gi|551486053|gb|KF691746.1| Panax ginseng glutathione peroxidase 1 mRNA, complete cds 4.20312e-15	-	sp|O23814|GPX4_SPIOL Probable phospholipid hydroperoxide glutathione peroxidase OS=Spinacia oleracea PE=2 SV=1 1.04046e-08	tr|U5NNJ1|U5NNJ1_PANGI Glutathione peroxidase OS=Panax ginseng PE=2 SV=1 3.0e-07	GO:0004602, glutathione peroxidase activity;GO:0005737, cytoplasm;GO:0006979, response to oxidative stress;GO:0047066, phospholipid-hydroperoxide glutathione peroxidase activity	-
TRINITY_DN98479_c3_g3	1.99514776667	18.837169	-3.2390146556599997	0.000878106470766	0.0205913577399	down	cd06398, PB1_Joka2, The PB1 domain is present in the Nicotiana plumbaginifolia Joka2 protein which interacts with sulfur stress inducible UP9 protein. The PB1 domain is a modular domain mediating specific protein-protein interactions which play a role in many critical cell processes, such as osteoclastogenesis, angiogenesis, early cardiovascular development and cell polarity. A canonical PB1-PB1 …	-	gi|1021033263|gb|KZM91047.1| hypothetical protein DCAR_021588 [Daucus carota subsp. sativus] 1.6e-151	gi|731425008|ref|XM_010664795.1| PREDICTED: Vitis vinifera uncharacterized LOC100253588 (LOC100253588), transcript variant X2, mRNA 5.7744e-23	-	sp|Q9SB64|NBR1_ARATH Protein NBR1 homolog OS=Arabidopsis thaliana GN=NBR1 PE=1 SV=1 1.97727e-49	tr|M1CKU0|M1CKU0_SOLTU Uncharacterized protein OS=Solanum tuberosum GN=PGSC0003DMG400027073 PE=4 SV=1 3.9e-68	GO:0005737, cytoplasm;GO:0005773, vacuole;GO:0006914, autophagy;GO:0008270, zinc ion binding;GO:0015031, protein transport;GO:0043130, ubiquitin binding;GO:0051258, protein polymerization	-
TRINITY_DN90368_c2_g3	61.622606999999995	5.06419122084	3.6050559319699995	7.39458041972e-08	3.33562333558e-05	up	cd04038, C2_ArfGAP, C2 domain present in Arf GTPase Activating Proteins (GAP). ArfGAP is a GTPase activating protein which regulates the ADP ribosylation factor Arf, a member of the Ras superfamily of GTP-binding proteins. The GTP-bound form of Arf is involved in Golgi morphology and is involved in recruiting coat proteins. ArfGAP is responsible for the GDP-bound form of Arf which is necessary fo…	KOG1030, KOG1030, KOG1030, Predicted Ca2+-dependent phospholipid-binding protein [General function prediction only]. 8.47172e-43	gi|1021031008|gb|KZM88793.1| hypothetical protein DCAR_025868 [Daucus carota subsp. sativus] 9.1e-61	gi|187942408|gb|EU591518.1| Nicotiana langsdorffii pollen-specific C2 domain containing protein mRNA, complete cds 6.61608e-33	-	sp|Q9LVH4|CAR4_ARATH Protein C2-DOMAIN ABA-RELATED 4 OS=Arabidopsis thaliana GN=CAR4 PE=1 SV=1 5.48948e-55	tr|A0A067E6L7|A0A067E6L7_CITSI Uncharacterized protein OS=Citrus sinensis GN=CISIN_1g031128mg PE=4 SV=1 5.3e-53	GO:0005096, GTPase activator activity;GO:0005543, phospholipid binding;GO:0005634, nucleus;GO:0005829, cytosol;GO:0005886, plasma membrane;GO:0006952, defense response;GO:0009651, response to salt stress;GO:0009738, abscisic acid-activated signaling pathway;GO:0009789, positive regulation of abscisic acid-activated signaling pathway;GO:0043547, positive regulation of GTPase activity;GO:0046872, m…	-
TRINITY_DN84707_c1_g1	42.608266666700004	12.3398	1.7878143510099997	0.00256311675361	0.0384420168469	up	cd01763, Sumo, Small ubiquitin-related modifier (SUMO). Small ubiquitin-related modifier (SUMO) proteins are conjugated to numerous intracellular targets and serve to modulate protein interaction, localization, activity or stability. SUMO (also known as "Smt3" and "sentrin" in other organisms) is linked to several different pathways, including nucleocytoplasmic transport. Attachment of SUMO to ta…	KOG1769, KOG1769, KOG1769, Ubiquitin-like proteins [Posttranslational modification, protein turnover, chaperones]. 5.75438e-33	gi|1021049251|gb|KZN07031.1| hypothetical protein DCAR_007868 [Daucus carota subsp. sativus] 1.1e-48	gi|388495913|gb|BT136228.1| Lotus japonicus clone JCVI-FLLj-3P12 unknown mRNA 2.2746e-48	pfam11976, Rad60-SLD, Ubiquitin-2 like Rad60 SUMO-like. The small ubiquitin-related modifier SUMO-1 is a Ub/Ubl family member, and although SUMO-1 shares structural similarity to Ub, SUMO's cellular functions remain distinct insomuch as SUMO modification alters protein function through changes in activity, cellular localization, or by protecting substrates from ubiquitination. Rad60 family member…	sp|P55857|SUMO1_ORYSJ Small ubiquitin-related modifier 1 OS=Oryza sativa subsp. japonica GN=SUMO1 PE=1 SV=1 5.37643e-54	tr|B9SU01|B9SU01_RICCO Small ubiquitin-related modifier OS=Ricinus communis GN=RCOM_0753100 PE=3 SV=1 7.6e-42	GO:0005634, nucleus;GO:0005737, cytoplasm;GO:0016925, protein sumoylation;GO:0031386, protein tag	K12160-ko03013 RNA transport
TRINITY_DN85358_c0_g2	0.2577292	5.44503046667	-4.4010122164	0.00092779475797	0.0212506220358	down	cd04852, Peptidases_S8_3, Peptidase S8 family domain, uncharacterized subfamily 3. This family is a member of the Peptidases S8 or Subtilases serine endo- and exo-peptidase clan. They have an Asp/His/Ser catalytic triad similar to that found in trypsin-like proteases, but do not share their three-dimensional structure and are not homologous to trypsin. The stability of subtilases may be enhanced …	-	gi|802563992|ref|XP_012067182.1| PREDICTED: subtilisin-like protease SBT3.5 [Jatropha curcas] 2.0e-49	gi|1009149150|ref|XM_016036841.1| PREDICTED: Ziziphus jujuba subtilisin-like protease SBT3.9 (LOC107426615), mRNA 3.61682e-50	pfam05922, Inhibitor_I9, Peptidase inhibitor I9. This family includes the proteinase B inhibitor from Saccharomyces cerevisiae and the activation peptides from peptidases of the subtilisin family. The subtilisin propeptides are known to function as molecular chaperones, assisting in the folding of the mature peptidase, but have also been shown to act as 'temporary inhibitors'. 2.49074e-09	sp|Q9ZSB1|SBT3A_ARATH Subtilisin-like protease SBT3.10 OS=Arabidopsis thaliana GN=SBT3.10 PE=3 SV=2 1.98544e-35	tr|A0A067L3G5|A0A067L3G5_JATCU Uncharacterized protein OS=Jatropha curcas GN=JCGZ_26741 PE=4 SV=1 1.5e-49	GO:0004252, serine-type endopeptidase activity;GO:0005576, extracellular region;GO:0005618, cell wall	-
TRINITY_DN74914_c0_g1	17.46327	1.67901666667	3.3786352728400004	4.99731045545e-05	0.00354765350005	up	-	-	gi|1021025750|gb|KZM83538.1| hypothetical protein DCAR_031107 [Daucus carota subsp. sativus] 4.7e-80	-	-	-	tr|A0A022QTK3|A0A022QTK3_ERYGU Uncharacterized protein OS=Erythranthe guttata GN=MIMGU_mgv1a011075mg PE=4 SV=1 1.3e-34	-	-
TRINITY_DN98733_c1_g2	30.7817333333	0.6043486666669999	5.67054953925	0.00229189639293	0.0361538437698	up	-	-	-	-	-	-	-	-	-
TRINITY_DN98733_c1_g4	5.36345266667	0.42213633333300005	3.66738110689	0.000877274401371	0.0205913577399	up	-	-	-	-	-	-	-	-	-
TRINITY_DN87585_c2_g4	17.881495	1.43250533333	3.6418549441300003	0.00011729292323600001	0.006096370692970001	up	-	-	gi|1021041468|gb|KZM99249.1| hypothetical protein DCAR_013389 [Daucus carota subsp. sativus] 3.0e-66	-	-	-	tr|F6HKL5|F6HKL5_VITVI Putative uncharacterized protein OS=Vitis vinifera GN=VIT_08s0007g03260 PE=4 SV=1 2.2e-37	-	-
TRINITY_DN68983_c0_g6	21.2714126667	0.722951333333	4.87887350477	3.524368124e-08	1.77466961419e-05	up	-	-	-	-	-	-	-	-	-
TRINITY_DN96095_c2_g2	0.42037866666699997	9.68344066667	-4.5257583865	1.58911945168e-05	0.00164108795266	down	sd00034, LRR_AMN1, leucine-rich repeats, antagonist of mitotic exit network protein 1-like subfamily. A leucine-rich repeat (LRR) is a structural protein motif of 20-30 amino acids that is unusually rich in the hydrophobic amino acid leucine. The conserved eleven-residue sequence motif (LxxLxLxxN/CxL) within the LRRs corresponds to the beta-strand and adjacent loop regions, whereas the remaining …	KOG1947, KOG1947, KOG1947, Leucine rich repeat proteins, some proteins contain F-box [General function prediction only]. 5.65458e-08	gi|661896450|emb|CDO99639.1| unnamed protein product [Coffea canephora] 7.8e-79	gi|970010080|ref|XM_015210448.1| PREDICTED: Solanum pennellii protein AUXIN SIGNALING F-BOX 2-like (LOC107011102), transcript variant X4, mRNA 9.66628e-91	-	sp|Q7XVM8|TIR1B_ORYSJ Transport inhibitor response 1-like protein Os04g0395600 OS=Oryza sativa subsp. japonica GN=Os04g0395600 PE=2 SV=1 8.44398e-71	tr|A0A068TUK3|A0A068TUK3_COFCA Uncharacterized protein OS=Coffea canephora GN=GSCOC_T00029290001 PE=4 SV=1 6.0e-79	GO:0000822, inositol hexakisphosphate binding;GO:0005634, nucleus;GO:0009734, auxin-activated signaling pathway;GO:0010011, auxin binding;GO:0016567, protein ubiquitination;GO:0019005, SCF ubiquitin ligase complex	K14485-ko04075 Plant hormone signal transduction
TRINITY_DN95698_c0_g3	6.06764233333	1.43604633333	2.07903374841	0.000468591106976	0.0141042745383	up	-	-	-	-	-	-	-	-	-
TRINITY_DN98925_c13_g2	1.178507	8.304789666669999	-2.8169833020599997	0.00262425345188	0.039001095417	down	PLN03130, PLN03130, ABC transporter C family member; Provisional. 0.0	KOG0054, KOG0054, KOG0054, Multidrug resistance-associated protein/mitoxantrone resistance protein, ABC superfamily [Secondary metabolites biosynthesis, transport and catabolism]. 1.96167e-95	gi|1021046230|gb|KZN04010.1| hypothetical protein DCAR_004808 [Daucus carota subsp. sativus] 2.4e-174	gi|743936350|ref|XM_011014264.1| PREDICTED: Populus euphratica ABC transporter C family member 2-like (LOC105116788), transcript variant X8, mRNA 0.0	pfam00005, ABC_tran, ABC transporter. ABC transporters for a large family of proteins responsible for translocation of a variety of compounds across biological membranes. ABC transporters are the largest family of proteins in many completely sequenced bacteria. ABC transporters are composed of two copies of this domain and two copies of a transmembrane domain pfam00664. These four domains may bel…	sp|Q42093|AB2C_ARATH ABC transporter C family member 2 OS=Arabidopsis thaliana GN=ABCC2 PE=1 SV=2 0.0	tr|A0A103XBY3|A0A103XBY3_CYNCS AAA+ ATPase domain-containing protein OS=Cynara cardunculus var. scolymus GN=Ccrd_024782 PE=4 SV=1 1.2e-162	GO:0000325, plant-type vacuole;GO:0005524, ATP binding;GO:0005773, vacuole;GO:0005774, vacuolar membrane;GO:0008559, xenobiotic transmembrane transporting ATPase activity;GO:0016021, integral component of membrane;GO:0042626, ATPase activity, coupled to transmembrane movement of substances;GO:1902417, (+)-abscisic acid D-glucopyranosyl ester transmembrane transporter activity;GO:1902418, (+)-absc…	-
TRINITY_DN79329_c0_g3	13.556306666700001	0.7512753333329999	4.17347863334	0.0005499229038169999	0.015590800174	up	-	-	-	-	-	-	-	-	-
TRINITY_DN73927_c0_g7	15.9259666667	2.49573	2.6738471730400004	0.00118646062249	0.0244109583113	up	-	-	-	-	-	-	-	-	-
TRINITY_DN92437_c1_g4	43.2212573333	2.2779916666699997	4.2459066672	4.50898546282e-07	0.00012358234966600002	up	-	-	-	-	-	-	-	-	-
TRINITY_DN82073_c0_g3	26.8331787667	4.111553	2.70626264101	0.000633946179439	0.016929611344999998	up	TIGR03162, Adenosylcobalamin/alpha-ribazole_phosphatase, alpha-ribazole phosphatase. Members of this protein family include the known CobC protein of Salmonella and Eschichia coli species, and homologous proteins found in cobalamin biosynthesis regions in other bacteria. This protein is alpha-ribazole phosphatase (EC 3.1.3.73) and, like many phosphatases, can be closely related in sequence to oth…	KOG0235, KOG0235, KOG0235, Phosphoglycerate mutase [Carbohydrate transport and metabolism]. 3.86267e-08	gi|1021024045|gb|KZM81833.1| hypothetical protein DCAR_029446 [Daucus carota subsp. sativus] 2.0e-144	gi|566169328|ref|XM_006382574.1| Populus trichocarpa hypothetical protein (POPTR_0005s04020g) mRNA, complete cds 3.99339e-109	pfam00300, His_Phos_1, Histidine phosphatase superfamily (branch 1). The histidine phosphatase superfamily is so named because catalysis centres on a conserved His residue that is transiently phosphorylated during the catalytic cycle. Other conserved residues contribute to a 'phosphate pocket' and interact with the phospho group of substrate before, during and after its transfer to the His residu…	sp|Q9MAA2|AT74_ARATH Phosphoglycerate mutase-like protein AT74 OS=Arabidopsis thaliana GN=At3g05170 PE=2 SV=1 9.22136e-145	tr|A0A0A0LYJ5|A0A0A0LYJ5_CUCSA Uncharacterized protein OS=Cucumis sativus GN=Csa_1G571810 PE=4 SV=1 4.7e-122	GO:0003824, catalytic activity;GO:0005829, cytosol;GO:0005975, carbohydrate metabolic process;GO:0008152, metabolic process;GO:0050278, sedoheptulose-bisphosphatase activity	-
TRINITY_DN73169_c0_g2	0.423197666667	6.307442666669999	-3.89765160929	0.00210260766777	0.034328403701	down	-	-	-	-	-	-	-	-	-
TRINITY_DN93763_c0_g1	46.619485733299996	16.202674966700002	1.5247010766999998	0.0024242272944099996	0.037262312437999996	up	pfam02230, Abhydrolase_2, Phospholipase/Carboxylesterase. This family consists of both phospholipases and carboxylesterases with broad substrate specificity, and is structurally related to alpha/beta hydrolases pfam00561. 1.32867e-09	KOG2112, KOG2112, KOG2112, Lysophospholipase [Lipid transport and metabolism]. 1.6063e-21	gi|1021030621|gb|KZM88406.1| hypothetical protein DCAR_025481 [Daucus carota subsp. sativus] 1.2e-72	gi|731402649|ref|XM_010656443.1| PREDICTED: Vitis vinifera acyl-protein thioesterase 2 (LOC100246445), transcript variant X2, mRNA 2.53806e-82	pfam02230, Abhydrolase_2, Phospholipase/Carboxylesterase. This family consists of both phospholipases and carboxylesterases with broad substrate specificity, and is structurally related to alpha/beta hydrolases pfam00561. 3.17431e-10	sp|O95372|LYPA2_HUMAN Acyl-protein thioesterase 2 OS=Homo sapiens GN=LYPLA2 PE=1 SV=1 2.04115e-11	tr|A0A068TP61|A0A068TP61_COFCA Uncharacterized protein OS=Coffea canephora GN=GSCOC_T00022112001 PE=4 SV=1 2.9e-63	GO:0002084, protein depalmitoylation;GO:0005737, cytoplasm;GO:0006631, fatty acid metabolic process;GO:0008474, palmitoyl-(protein) hydrolase activity;GO:0016787, hydrolase activity;GO:0052689, carboxylic ester hydrolase activity;GO:0070062, extracellular exosome	-
TRINITY_DN94938_c2_g5	416.56709533300005	20.4338573333	4.3495154104500005	2.63168016027e-07	8.17923675457e-05	up	PLN00035, PLN00035, histone H4; Provisional. 1.04438e-49	KOG3467, KOG3467, KOG3467, Histone H4 [Chromatin structure and dynamics]. 8.21918e-50	gi|565468248|ref|XP_006292004.1| hypothetical protein CARUB_v10018191mg [Capsella rubella] 1.5e-35	gi|1025339323|ref|XM_016652325.1| PREDICTED: Nicotiana tabacum uncharacterized LOC107825453 (LOC107825453), mRNA 1.33206e-88	-	sp|P0CG89|H4_SOYBN Histone H4 OS=Glycine max PE=3 SV=1 1.74734e-48	tr|R0FQR2|R0FQR2_9BRAS Histone H4 OS=Capsella rubella GN=CARUB_v10018191mg PE=3 SV=1 1.2e-35	GO:0000786, nucleosome;GO:0003677, DNA binding;GO:0005634, nucleus;GO:0005730, nucleolus;GO:0005774, vacuolar membrane;GO:0005829, cytosol;GO:0005886, plasma membrane;GO:0006334, nucleosome assembly;GO:0009506, plasmodesma;GO:0009507, chloroplast;GO:0009579, thylakoid	-
TRINITY_DN87338_c0_g3	11.477205999999999	3.2633330000000003	1.8143533596	0.0037931306651100005	0.0484924992351	up	-	-	gi|1021044495|gb|KZN02276.1| hypothetical protein DCAR_011030 [Daucus carota subsp. sativus] 9.5e-25	-	-	sp|Q3ED68|Y1295_ARATH Uncharacterized PKHD-type hydroxylase At1g22950 OS=Arabidopsis thaliana GN=At1g22950 PE=2 SV=2 1.64625e-12	tr|A0A0J8BBY5|A0A0J8BBY5_BETVU Uncharacterized protein OS=Beta vulgaris subsp. vulgaris GN=BVRB_3g067780 PE=4 SV=1 3.9e-18	GO:0005506, iron ion binding;GO:0016705, oxidoreductase activity, acting on paired donors, with incorporation or reduction of molecular oxygen;GO:0031418, L-ascorbic acid binding;GO:0051213, dioxygenase activity	-
TRINITY_DN86461_c0_g2	2.81245533333	35.118154	-3.64231492189	8.07526497746e-05	0.00485689802908	down	pfam13639, zf-RING_2, Ring finger domain. 4.28831e-07	KOG4628, KOG4628, KOG4628, Predicted E3 ubiquitin ligase [Posttranslational modification, protein turnover, chaperones]. 4.08317e-08	gi|1021030342|gb|KZM88127.1| hypothetical protein DCAR_025202 [Daucus carota subsp. sativus] 5.1e-74	-	pfam13639, zf-RING_2, Ring finger domain. 1.02451e-07	sp|Q9SUS5|RHA1B_ARATH E3 ubiquitin-protein ligase RHA1B OS=Arabidopsis thaliana GN=RHA1B PE=2 SV=1 1.21098e-20	tr|A0A0D2QYL5|A0A0D2QYL5_GOSRA Uncharacterized protein OS=Gossypium raimondii GN=B456_004G159300 PE=4 SV=1 2.6e-49	GO:0004842, ubiquitin-protein transferase activity;GO:0008270, zinc ion binding;GO:0010200, response to chitin;GO:0016021, integral component of membrane;GO:0016567, protein ubiquitination;GO:0016874, ligase activity;GO:0046686, response to cadmium ion	-
TRINITY_DN95140_c2_g4	2.1799939999999998	31.9618	-3.8739525897500005	0.000825207888923	0.019904578106500002	down	pfam06507, Auxin_resp, Auxin response factor. A conserved region of auxin-responsive transcription factors. 7.22131e-15	-	gi|470122939|ref|XP_004297494.1| PREDICTED: auxin response factor 2 [Fragaria vesca subsp. vesca] 1.6e-75	gi|566197840|ref|XM_002318731.2| Populus trichocarpa auxin response factor 2 family protein (POPTR_0012s10790g) mRNA, complete cds 2.97525e-120	pfam06507, Auxin_resp, Auxin response factor. A conserved region of auxin-responsive transcription factors. 1.72523e-15	sp|Q94JM3|ARFB_ARATH Auxin response factor 2 OS=Arabidopsis thaliana GN=ARF2 PE=1 SV=2 3.14427e-93	tr|B9IFK3|B9IFK3_POPTR Auxin response factor OS=Populus trichocarpa GN=POPTR_0015s11660g PE=3 SV=1 4.7e-75	GO:0003677, DNA binding;GO:0003700, DNA binding transcription factor activity;GO:0005634, nucleus;GO:0006351, transcription, DNA-templated;GO:0006355, regulation of transcription, DNA-templated;GO:0008285, negative regulation of cell proliferation;GO:0009734, auxin-activated signaling pathway;GO:0009737, response to abscisic acid;GO:0009911, positive regulation of flower development;GO:0010047, f…	-
TRINITY_DN92058_c1_g3	126.92893333299999	29.5071333333	2.10488529518	0.000770795595151	0.019058814285900002	up	-	-	gi|1021049453|gb|KZN07233.1| hypothetical protein DCAR_008070 [Daucus carota subsp. sativus] 5.2e-20	-	-	-	-	-	-
TRINITY_DN72775_c1_g1	0.7551836666670001	12.0465129	-3.99564421821	0.00148190435501	0.0280314680223	down	-	-	gi|1021030294|gb|KZM88079.1| hypothetical protein DCAR_025154 [Daucus carota subsp. sativus] 8.1e-64	-	-	-	tr|A0A061EJN2|A0A061EJN2_THECC Cc-nbs-lrr resistance protein, putative OS=Theobroma cacao GN=TCM_019825 PE=3 SV=1 2.9e-13	GO:0006952, defense response;GO:0043531, ADP binding	-
TRINITY_DN74787_c0_g2	0.574986	12.3565833333	-4.4256092455000005	4.5553026429e-06	0.0006755680223169999	down	-	-	-	-	-	-	-	-	-
TRINITY_DN95934_c1_g1	222.14366666700002	44.0751333333	2.33345617157	0.00020820989072799998	0.008707485571799999	up	pfam04724, Glyco_transf_17, Glycosyltransferase family 17. This family represents beta-1,4-mannosyl-glycoprotein beta-1,4-N-acetylglucosaminyltransferase (EC:2.4.1.144). This enzyme transfers the bisecting GlcNAc to the core mannose of complex N-glycans. The addition of this residue is regulated during development and has functional consequences for receptor signalling, cell adhesion, and tumour …	-	gi|1021028282|gb|KZM86069.1| hypothetical protein DCAR_026509 [Daucus carota subsp. sativus] 2.6e-104	gi|743898224|ref|XM_011044101.1| PREDICTED: Populus euphratica uncharacterized LOC105138098 (LOC105138098), mRNA 1.0435e-149	pfam04724, Glyco_transf_17, Glycosyltransferase family 17. This family represents beta-1,4-mannosyl-glycoprotein beta-1,4-N-acetylglucosaminyltransferase (EC:2.4.1.144). This enzyme transfers the bisecting GlcNAc to the core mannose of complex N-glycans. The addition of this residue is regulated during development and has functional consequences for receptor signalling, cell adhesion, and tumour …	-	tr|A0A103XRQ4|A0A103XRQ4_CYNCS Glycosyl transferase, family 17 OS=Cynara cardunculus var. scolymus GN=Ccrd_002276 PE=4 SV=1 2.2e-95	GO:0003830, beta-1,4-mannosylglycoprotein 4-beta-N-acetylglucosaminyltransferase activity;GO:0006487, protein N-linked glycosylation;GO:0016021, integral component of membrane	-
TRINITY_DN77015_c1_g1	1.34916059692	30.3267869214	-4.49045866025	1.13477888537e-05	0.00128641940763	down	smart00332, PP2Cc, Serine/threonine phosphatases, family 2C, catalytic domain. The protein architecture and deduced catalytic mechanism of PP2C phosphatases are similar to the PP1, PP2A, PP2B family of protein Ser/Thr phosphatases, with which PP2C shares no sequence similarity. 2.25305e-14	KOG0699, KOG0699, KOG0699, Serine/threonine protein phosphatase [Signal transduction mechanisms]. 2.566e-22	gi|1021035281|gb|KZM93064.1| hypothetical protein DCAR_016309 [Daucus carota subsp. sativus] 9.4e-45	-	pfam00481, PP2C, Protein phosphatase 2C. Protein phosphatase 2C is a Mn++ or Mg++ dependent protein serine/threonine phosphatase. 3.93232e-13	sp|O81716|P2C21_ARATH Probable protein phosphatase 2C 21 OS=Arabidopsis thaliana GN=PPC4-2 PE=1 SV=1 3.8977e-41	tr|A0A068TPU3|A0A068TPU3_COFCA Uncharacterized protein OS=Coffea canephora GN=GSCOC_T00022269001 PE=3 SV=1 4.5e-39	GO:0004722, protein serine/threonine phosphatase activity;GO:0005886, plasma membrane;GO:0009737, response to abscisic acid;GO:0046872, metal ion binding	-
TRINITY_DN93179_c0_g3	0.161964	5.496784333330001	-5.08484279256	0.000343970809372	0.011804328943700001	down	PLN02667, PLN02667, inositol polyphosphate multikinase. 6.0004e-13	-	gi|1021035298|gb|KZM93081.1| hypothetical protein DCAR_016326 [Daucus carota subsp. sativus] 6.9e-17	-	-	sp|Q9FLT2|IPMKB_ARATH Inositol polyphosphate multikinase beta OS=Arabidopsis thaliana GN=IPK2b PE=1 SV=1 6.05764e-10	tr|A0A0V0I453|A0A0V0I453_SOLCH Putative inositol polyphosphate multikinase beta-like OS=Solanum chacoense PE=4 SV=1 8.7e-12	GO:0000823, inositol-1,4,5-trisphosphate 6-kinase activity;GO:0000824, inositol tetrakisphosphate 3-kinase activity;GO:0005524, ATP binding;GO:0005634, nucleus;GO:0006355, regulation of transcription, DNA-templated;GO:0008440, inositol-1,4,5-trisphosphate 3-kinase activity;GO:0009555, pollen development;GO:0009793, embryo development ending in seed dormancy;GO:0010183, pollen tube guidance;GO:001…	K00915-ko04070 Phosphatidylinositol signaling system;ko00562 Inositol phosphate metabolism
TRINITY_DN87287_c0_g1	71.07819599999999	15.181588	2.2270843604099997	0.0009330721905660001	0.021296405580700003	up	-	-	-	-	-	-	-	-	-
TRINITY_DN69167_c3_g1	100.970935	9.395316666669999	3.42585446725	0.0014168208638299998	0.0272527192335	up	-	-	-	-	-	-	-	-	-
TRINITY_DN91671_c1_g1	20.0394543333	2.69033146667	2.8969873866	0.0026009665297600003	0.0387904853915	up	-	-	-	-	-	-	-	-	-
TRINITY_DN89093_c0_g1	170.6166	12.184660000000001	3.80762011944	1.63908578041e-05	0.0016635952349700002	up	-	-	-	-	-	-	-	-	-
TRINITY_DN84420_c0_g2	2.14663666667	62.019302	-4.85256735844	0.00019168164845200002	0.00824573830362	down	-	-	-	-	-	sp|Q9SYL9|RK13_ARATH 50S ribosomal protein L13, chloroplastic OS=Arabidopsis thaliana GN=RPL13 PE=2 SV=1 3.36939e-12	-	GO:0003729, mRNA binding;GO:0003735, structural constituent of ribosome;GO:0006412, translation;GO:0009507, chloroplast;GO:0009570, chloroplast stroma;GO:0009579, thylakoid;GO:0009735, response to cytokinin;GO:0009941, chloroplast envelope;GO:0022625, cytosolic large ribosomal subunit	-
TRINITY_DN64263_c0_g1	6.85945333333	0.0001	16.0658059844	0.000374960803985	0.0124383997071	up	-	-	-	-	-	-	-	-	-
TRINITY_DN76841_c3_g2	16.5677986667	0.5850715	4.823625173480001	1.94975454407e-06	0.000364986184206	up	-	-	-	-	-	-	-	-	-
TRINITY_DN75018_c3_g3	12.070753333299999	0.42720666666699997	4.82043774617	0.00026303728369	0.010092914117200001	up	-	-	-	-	-	-	-	-	-
TRINITY_DN92846_c0_g1	696.529	110.6846	2.65372891268	0.000666517763553	0.017433329260499997	up	cd14066, STKc_IRAK, Catalytic domain of the Serine/Threonine kinases, Interleukin-1 Receptor Associated Kinases and related STKs. STKs catalyze the transfer of the gamma-phosphoryl group from ATP to serine/threonine residues on protein substrates. IRAKs are involved in Toll-like receptor (TLR) and interleukin-1 (IL-1) signalling pathways, and are thus critical in regulating innate immune response…	KOG1187, KOG1187, KOG1187, Serine/threonine protein kinase [Signal transduction mechanisms]. 1.79777e-51	gi|1021040463|gb|KZM98244.1| hypothetical protein DCAR_014394 [Daucus carota subsp. sativus] 7.5e-113	-	pfam07714, Pkinase_Tyr, Protein tyrosine kinase. 1.80263e-16	sp|Q9FIJ6|ACCR4_ARATH Serine/threonine-protein kinase-like protein CCR4 OS=Arabidopsis thaliana GN=CCR4 PE=1 SV=1 3.67174e-97	tr|A0A068V6S6|A0A068V6S6_COFCA Uncharacterized protein OS=Coffea canephora GN=GSCOC_T00018485001 PE=3 SV=1 9.5e-92	GO:0004672, protein kinase activity;GO:0004674, protein serine/threonine kinase activity;GO:0005524, ATP binding;GO:0016021, integral component of membrane;GO:0042803, protein homodimerization activity	-
TRINITY_DN71703_c0_g1	0.2096938	12.693534699999999	-5.91966584837	0.00100947809423	0.022243103313	down	cd14066, STKc_IRAK, Catalytic domain of the Serine/Threonine kinases, Interleukin-1 Receptor Associated Kinases and related STKs. STKs catalyze the transfer of the gamma-phosphoryl group from ATP to serine/threonine residues on protein substrates. IRAKs are involved in Toll-like receptor (TLR) and interleukin-1 (IL-1) signalling pathways, and are thus critical in regulating innate immune response…	KOG1187, KOG1187, KOG1187, Serine/threonine protein kinase [Signal transduction mechanisms]. 9.86273e-55	gi|1021030559|gb|KZM88344.1| hypothetical protein DCAR_025419 [Daucus carota subsp. sativus] 5.4e-164	-	pfam07714, Pkinase_Tyr, Protein tyrosine kinase. 3.59359e-17	sp|Q9SCZ4|FERON_ARATH Receptor-like protein kinase FERONIA OS=Arabidopsis thaliana GN=FER PE=1 SV=1 1.04328e-124	tr|A0A068VGC2|A0A068VGC2_COFCA Uncharacterized protein OS=Coffea canephora GN=GSCOC_T00003236001 PE=3 SV=1 3.5e-123	GO:0004672, protein kinase activity;GO:0004674, protein serine/threonine kinase activity;GO:0005524, ATP binding;GO:0005622, intracellular;GO:0005886, plasma membrane;GO:0007338, single fertilization;GO:0009506, plasmodesma;GO:0009723, response to ethylene;GO:0009738, abscisic acid-activated signaling pathway;GO:0009741, response to brassinosteroid;GO:0009742, brassinosteroid mediated signaling p…	-
TRINITY_DN78906_c1_g3	41.3752157667	13.5968235103	1.6054971869699999	0.00389160243129	0.049142072148	up	-	-	gi|1021032194|gb|KZM89978.1| hypothetical protein DCAR_022657 [Daucus carota subsp. sativus] 1.5e-30	gi|720058856|ref|XM_010276105.1| PREDICTED: Nelumbo nucifera probable complex I intermediate-associated protein 30 (LOC104609731), mRNA 1.22278e-53	-	sp|Q9LQI7|CIA30_ARATH Probable complex I intermediate-associated protein 30 OS=Arabidopsis thaliana GN=At1g17350 PE=1 SV=2 4.96057e-28	tr|A0A059AHY5|A0A059AHY5_EUCGR Uncharacterized protein OS=Eucalyptus grandis GN=EUGRSUZ_J02608 PE=4 SV=1 2.0e-30	GO:0005739, mitochondrion	-
TRINITY_DN98772_c1_g1	5.05611133333	0.636324	2.99019479004	0.0013578899403499998	0.026581237475299998	up	-	-	-	-	-	-	-	-	-
TRINITY_DN86906_c0_g4	0.176862666667	9.10466666667	-5.6859047475499995	0.00401371995329	0.0499557783111	down	-	-	-	-	-	-	-	-	-
TRINITY_DN88056_c0_g1	0.978859177517	6.907710066989999	-2.81903430264	0.00039427371298699995	0.0128280659777	down	cd13999, STKc_MAP3K-like, Catalytic domain of Mitogen-Activated Protein Kinase (MAPK) Kinase Kinase-like Serine/Threonine kinases. STKs catalyze the transfer of the gamma-phosphoryl group from ATP to serine/threonine residues on protein substrates. This subfamily is composed mainly of MAP3Ks and similar proteins, including TGF-beta Activated Kinase-1 (TAK1, also called MAP3K7), MAP3K12, MAP3K13, …	KOG0192, KOG0192, KOG0192, Tyrosine kinase specific for activated (GTP-bound) p21cdc42Hs [Signal transduction mechanisms]. 3.62891e-31	gi|1021052079|gb|KZN09857.1| hypothetical protein DCAR_002513 [Daucus carota subsp. sativus] 2.6e-237	gi|566191002|ref|XM_002314914.2| Populus trichocarpa kinase family protein (POPTR_0010s15610g) mRNA, complete cds 1.50114e-95	pfam07714, Pkinase_Tyr, Protein tyrosine kinase. 1.13959e-11	sp|Q9FPR3|EDR1_ARATH Serine/threonine-protein kinase EDR1 OS=Arabidopsis thaliana GN=EDR1 PE=1 SV=1 3.60258e-54	tr|M1C7W8|M1C7W8_SOLTU Uncharacterized protein OS=Solanum tuberosum GN=PGSC0003DMG400024018 PE=4 SV=1 6.5e-148	GO:0000165, MAPK cascade;GO:0002229, defense response to oomycetes;GO:0004672, protein kinase activity;GO:0004709, MAP kinase kinase kinase activity;GO:0004712, protein serine/threonine/tyrosine kinase activity;GO:0005524, ATP binding;GO:0005634, nucleus;GO:0005769, early endosome;GO:0005783, endoplasmic reticulum;GO:0005802, trans-Golgi network;GO:0005829, cytosol;GO:0006355, regulation of trans…	-
TRINITY_DN83616_c0_g4	9.23587	81.9291666667	-3.14905736905	0.00169172381749	0.030264198296099998	down	PLN02183, PLN02183, ferulate 5-hydroxylase. 1.45938e-19	KOG0156, KOG0156, KOG0156, Cytochrome P450 CYP2 subfamily [Secondary metabolites biosynthesis, transport and catabolism]. 1.28532e-20	gi|1021034904|gb|KZM92688.1| hypothetical protein DCAR_019947 [Daucus carota subsp. sativus] 7.6e-41	-	pfam00067, p450, Cytochrome P450. Cytochrome P450s are haem-thiolate proteins involved in the oxidative degradation of various compounds. They are particularly well known for their role in the degradation of environmental toxins and mutagens. They can be divided into 4 classes, according to the method by which electrons from NAD(P)H are delivered to the catalytic site. Sequence conservation is re…	sp|H2DH18|C7A12_PANGI Cytochrome P450 CYP736A12 OS=Panax ginseng PE=2 SV=1 2.42316e-41	tr|A0A103XU46|A0A103XU46_CYNCS Cytochrome P450 OS=Cynara cardunculus var. scolymus GN=Ccrd_001024 PE=3 SV=1 3.6e-35	GO:0004497, monooxygenase activity;GO:0005506, iron ion binding;GO:0016021, integral component of membrane;GO:0016705, oxidoreductase activity, acting on paired donors, with incorporation or reduction of molecular oxygen;GO:0020037, heme binding	-
TRINITY_DN92690_c1_g1	1.46458133333	15.2695504133	-3.38209736652	0.00397515333194	0.0497234806437	down	-	KOG4824, KOG4824, KOG4824, Apolipoprotein D/Lipocalin [Cell wall/membrane/envelope biogenesis]. 1.70277e-07	gi|1021032300|gb|KZM90084.1| hypothetical protein DCAR_022551 [Daucus carota subsp. sativus] 3.2e-37	gi|985471895|ref|XM_006493893.2| PREDICTED: Citrus sinensis hypothetical protein (LOC102615887), mRNA 1.10273e-55	-	sp|Q9STS7|CHL_ARATH Chloroplastic lipocalin OS=Arabidopsis thaliana GN=CHL PE=1 SV=1 4.88937e-34	tr|V4UH78|V4UH78_9ROSI Uncharacterized protein OS=Citrus clementina GN=CICLE_v10008835mg PE=4 SV=1 1.1e-34	GO:0006629, lipid metabolic process;GO:0006979, response to oxidative stress;GO:0009408, response to heat;GO:0009414, response to water deprivation;GO:0009507, chloroplast;GO:0009535, chloroplast thylakoid membrane;GO:0009543, chloroplast thylakoid lumen;GO:0009644, response to high light intensity;GO:0009737, response to abscisic acid;GO:0010431, seed maturation;GO:0031977, thylakoid lumen;GO:00…	-
TRINITY_DN89668_c0_g1	0.315771	14.2623513333	-5.49718935609	0.00013963020553600002	0.00674774529035	down	-	KOG0314, KOG0314, KOG0314, Predicted E3 ubiquitin ligase [Posttranslational modification, protein turnover, chaperones]. 1.79745e-10	gi|728837124|gb|KHG16567.1| Uncharacterized protein F383_00045 [Gossypium arboreum] 1.3e-17	-	-	-	tr|A0A0B0NV96|A0A0B0NV96_GOSAR Uncharacterized protein OS=Gossypium arboreum GN=F383_00045 PE=4 SV=1 1.0e-17	GO:0003676, nucleic acid binding;GO:0005634, nucleus;GO:0008270, zinc ion binding	-
TRINITY_DN94358_c1_g2	29.0321666667	3.8471	2.91580900804	0.001769535307	0.0310628263686	up	MTH00054, ND1, NADH dehydrogenase subunit 1; Provisional. 6.97201e-18	KOG4768, KOG4768, KOG4768, Mitochondrial mRNA maturase [RNA processing and modification]. 5.64176e-40	gi|372450281|ref|YP_005090464.1| maturase (mitochondrion) [Millettia pinnata] 1.6e-72	gi|374081932|gb|JQ248574.1| Daucus carota subsp. sativus mitochondrion, complete genome 0.0	pfam00146, NADHdh, NADH dehydrogenase. 7.05704e-08	sp|P31839|NU1M_OENBE NADH-ubiquinone oxidoreductase chain 1 OS=Oenothera berteroana GN=ND1 PE=2 SV=1 2.26339e-46	tr|G9JLR3|G9JLR3_MILPI Maturase OS=Millettia pinnata GN=matR PE=4 SV=1 1.2e-72	GO:0005739, mitochondrion;GO:0005743, mitochondrial inner membrane;GO:0006397, mRNA processing;GO:0008137, NADH dehydrogenase (ubiquinone) activity;GO:0016021, integral component of membrane;GO:0070469, respiratory chain	-
TRINITY_DN85672_c0_g5	0.976341	9.189736666669999	-3.23456650023	0.000725875053809	0.0185104852502	down	pfam02701, zf-Dof, Dof domain, zinc finger. The Dof domain is a zinc finger DNA-binding domain, that shows resemblance to the Cys2 zinc finger. 1.25325e-28	-	gi|1021031699|gb|KZM89483.1| hypothetical protein DCAR_023154 [Daucus carota subsp. sativus] 3.4e-48	gi|747042454|ref|XM_011080361.1| PREDICTED: Sesamum indicum dof zinc finger protein DOF5.4-like (LOC105162358), mRNA 1.2372e-14	pfam02701, zf-Dof, Dof domain, zinc finger. The Dof domain is a zinc finger DNA-binding domain, that shows resemblance to the Cys2 zinc finger. 2.99412e-29	sp|Q8LDR0|DOF54_ARATH Dof zinc finger protein DOF5.4 OS=Arabidopsis thaliana GN=DOF5.4 PE=2 SV=2 3.14349e-42	tr|D9ZIX7|D9ZIX7_MALDO DOF domain class transcription factor OS=Malus domestica GN=DOF10 PE=2 SV=1 2.8e-39	GO:0003677, DNA binding;GO:0003700, DNA binding transcription factor activity;GO:0005634, nucleus;GO:0006351, transcription, DNA-templated;GO:0006355, regulation of transcription, DNA-templated;GO:0044212, transcription regulatory region DNA binding;GO:0046872, metal ion binding	-
TRINITY_DN82433_c0_g1	0.771464	10.3091633333	-3.7401846059099997	0.00173680294747	0.030742366247799996	down	PLN03160, PLN03160, uncharacterized protein; Provisional. 3.90166e-21	-	gi|1021052603|gb|KZN10381.1| hypothetical protein DCAR_003037 [Daucus carota subsp. sativus] 6.9e-85	-	-	-	tr|A0A061EK34|A0A061EK34_THECC Harpin-induced 1, putative OS=Theobroma cacao GN=TCM_019926 PE=4 SV=1 2.9e-43	GO:0009506, plasmodesma;GO:0016021, integral component of membrane;GO:0046658, anchored component of plasma membrane	-
TRINITY_DN95244_c1_g2	0.9555048746379999	6.597143666669999	-2.78750638453	0.00194526737433	0.032848224573	down	-	-	gi|1021036217|gb|KZM94000.1| hypothetical protein DCAR_017245 [Daucus carota subsp. sativus] 1.6e-09	gi|156070777|gb|EF517793.1| Petunia integrifolia subsp. inflata BAC 126I14, complete sequence 6.27337e-21	-	sp|O23212|U2A2A_ARATH Splicing factor U2af large subunit A OS=Arabidopsis thaliana GN=U2AF65A PE=1 SV=2 6.30866e-10	-	GO:0000166, nucleotide binding;GO:0000243, commitment complex;GO:0000398, mRNA splicing, via spliceosome;GO:0005634, nucleus;GO:0008187, poly-pyrimidine tract binding;GO:0016607, nuclear speck;GO:0030628, pre-mRNA 3'-splice site binding;GO:0042742, defense response to bacterium;GO:0071004, U2-type prespliceosome;GO:0089701, U2AF	-
TRINITY_DN78443_c0_g1	0.809069333845	6.53340733694	-3.01350034397	0.0028350002916700005	0.0410049240584	down	PLN02998, PLN02998, beta-glucosidase. 6.06168e-65	KOG0626, KOG0626, KOG0626, Beta-glucosidase, lactase phlorizinhydrolase, and related proteins [Carbohydrate transport and metabolism]. 2.15469e-46	gi|1021033087|gb|KZM90871.1| hypothetical protein DCAR_021764 [Daucus carota subsp. sativus] 5.7e-137	-	pfam00232, Glyco_hydro_1, Glycosyl hydrolase family 1. 1.21644e-56	sp|Q42707|F26G_CHESP Furostanol glycoside 26-O-beta-glucosidase OS=Cheilocostus speciosus GN=F26G PE=1 SV=1 4.91604e-73	tr|M5XI38|M5XI38_PRUPE Uncharacterized protein (Fragment) OS=Prunus persica GN=PRUPE_ppa021225mg PE=3 SV=1 1.2e-67	GO:0004553, hydrolase activity, hydrolyzing O-glycosyl compounds;GO:0005975, carbohydrate metabolic process;GO:0009507, chloroplast	K01188-ko00940 Phenylpropanoid biosynthesis;ko00460 Cyanoamino acid metabolism;ko00500 Starch and sucrose metabolism
TRINITY_DN78730_c0_g1	915.970689333	131.090233333	2.80474122955	7.44825073484e-05	0.0046209744315500005	up	pfam06955, XET_C, Xyloglucan endo-transglycosylase (XET) C-terminus. This family represents the C-terminus (approximately 60 residues) of plant xyloglucan endo-transglycosylase (XET). Xyloglucan is the predominant hemicellulose in the cell walls of most dicotyledons. With cellulose, it forms a network that strengthens the cell wall. XET catalyzes the splitting of xyloglucan chains and the linking…	-	gi|1021041546|gb|KZM99327.1| hypothetical protein DCAR_013311 [Daucus carota subsp. sativus] 3.0e-26	gi|219817255|gb|FJ148319.1| Daucus carota subsp. sativus clone BAC C085G24 genomic sequence 8.60561e-66	pfam06955, XET_C, Xyloglucan endo-transglycosylase (XET) C-terminus. This family represents the C-terminus (approximately 60 residues) of plant xyloglucan endo-transglycosylase (XET). Xyloglucan is the predominant hemicellulose in the cell walls of most dicotyledons. With cellulose, it forms a network that strengthens the cell wall. XET catalyzes the splitting of xyloglucan chains and the linking…	sp|Q9M0D1|XTH19_ARATH Probable xyloglucan endotransglucosylase/hydrolase protein 19 OS=Arabidopsis thaliana GN=XTH19 PE=2 SV=1 4.97833e-12	tr|K4CGD2|K4CGD2_SOLLC Xyloglucan endotransglucosylase/hydrolase OS=Solanum lycopersicum PE=3 SV=1 4.0e-15	GO:0004553, hydrolase activity, hydrolyzing O-glycosyl compounds;GO:0005618, cell wall;GO:0008283, cell proliferation;GO:0010411, xyloglucan metabolic process;GO:0016762, xyloglucan:xyloglucosyl transferase activity;GO:0042546, cell wall biogenesis;GO:0048046, apoplast;GO:0071365, cellular response to auxin stimulus;GO:0071555, cell wall organization	-
TRINITY_DN88481_c3_g1	0.834011433333	34.1437368967	-5.35540999255	8.462751660489999e-10	8.58929624391e-07	down	cd05574, STKc_phototropin_like, Catalytic domain of Phototropin-like Serine/Threonine Kinases. STKs catalyze the transfer of the gamma-phosphoryl group from ATP to serine/threonine residues on protein substrates. Phototropins are blue-light receptors that control responses such as phototropism, stromatal opening, and chloroplast movement in order to optimize the photosynthetic efficiency of plant…	KOG0610, KOG0610, KOG0610, Putative serine/threonine protein kinase [General function prediction only]. 2.59708e-85	gi|1001015458|gb|AML78053.1| putative LOV domain-containing protein [Flaveria palmeri] 3.6e-126	gi|1001017072|gb|KU701121.1| Angelica archangelica isolate TQKZ_2009359 putative LOV domain-containing protein mRNA, complete cds 0.0	pfam00069, Pkinase, Protein kinase domain. 6.73305e-17	sp|O48963|PHOT1_ARATH Phototropin-1 OS=Arabidopsis thaliana GN=PHOT1 PE=1 SV=1 1.55206e-147	tr|A0A126X009|A0A126X009_FLAPA Putative LOV domain-containing protein OS=Flaveria palmeri PE=2 SV=1 2.7e-126	GO:0000155, phosphorelay sensor kinase activity;GO:0004672, protein kinase activity;GO:0004674, protein serine/threonine kinase activity;GO:0005524, ATP binding;GO:0005622, intracellular;GO:0005634, nucleus;GO:0005737, cytoplasm;GO:0005773, vacuole;GO:0007623, circadian rhythm;GO:0009637, response to blue light;GO:0009638, phototropism;GO:0009882, blue light photoreceptor activity;GO:0009898, cyt…	-
TRINITY_DN94159_c0_g2	2.04848923333	10.5826149667	-2.36906394651	0.00359344239695	0.047003471159699994	down	COG5329, COG5329, Phosphoinositide polyphosphatase (Sac family) [Signal transduction mechanisms]. 1.70126e-19	KOG1888, KOG1888, KOG1888, Putative phosphoinositide phosphatase [Lipid transport and metabolism]. 4.62685e-115	gi|1021051026|gb|KZN08804.1| hypothetical protein DCAR_001460 [Daucus carota subsp. sativus] 5.2e-195	gi|731416994|ref|XM_002269479.2| PREDICTED: Vitis vinifera phosphoinositide phosphatase SAC1 (LOC100265019), mRNA 0.0	pfam02383, Syja_N, SacI homology domain. This Pfam family represents a protein domain which shows homology to the yeast protein SacI. The SacI homology domain is most notably found at the amino terminal of the inositol 5'-phosphatase synaptojanin. 2.11501e-19	sp|Q7XZU3|SAC1_ARATH Phosphoinositide phosphatase SAC1 OS=Arabidopsis thaliana GN=SAC1 PE=1 SV=1 0.0	tr|D7TXI8|D7TXI8_VITVI Putative uncharacterized protein OS=Vitis vinifera GN=VIT_14s0081g00460 PE=4 SV=1 8.7e-174	GO:0005774, vacuolar membrane;GO:0005794, Golgi apparatus;GO:0007010, cytoskeleton organization;GO:0009826, unidimensional cell growth;GO:0009832, plant-type cell wall biogenesis;GO:0036092, phosphatidylinositol-3-phosphate biosynthetic process;GO:0043813, phosphatidylinositol-3,5-bisphosphate 5-phosphatase activity	-
TRINITY_DN79495_c5_g1	785.376368615	133.444399507	2.55714543038	0.000352199963754	0.0119404243453	up	-	-	gi|1021028061|gb|KZM85848.1| hypothetical protein DCAR_026730 [Daucus carota subsp. sativus] 1.2e-38	-	-	-	tr|A0A103XSY1|A0A103XSY1_CYNCS Uncharacterized protein OS=Cynara cardunculus var. scolymus GN=Ccrd_001620 PE=4 SV=1 2.7e-30	-	-
TRINITY_DN94904_c1_g1	8.50587166667	0.9248346666670001	3.2011917061	0.0005682003877220001	0.0158746634775	up	-	-	gi|720069296|ref|XP_010277395.1| PREDICTED: uncharacterized protein LOC104611850 [Nelumbo nucifera] 2.0e-09	-	-	-	tr|A0A072TNG3|A0A072TNG3_MEDTR Uncharacterized protein OS=Medicago truncatula GN=MTR_8g036115 PE=4 SV=1 2.6e-09	-	-
TRINITY_DN69873_c0_g4	5.488556666669999	0.0950583333333	5.851469894419999	0.000587716154631	0.0162038532497	up	-	-	gi|1021034902|gb|KZM92686.1| hypothetical protein DCAR_019949 [Daucus carota subsp. sativus] 4.9e-07	-	-	-	-	-	-
TRINITY_DN94906_c0_g4	73.2560333333	2.32545666667	4.97736162256	1.30362342744e-09	1.1926685489600001e-06	up	-	-	-	-	-	-	-	-	-
TRINITY_DN70962_c1_g2	73.900442	6.667832666669999	3.47029318861	6.57586019689e-05	0.00425870539192	up	-	-	gi|703161411|ref|XP_010112784.1| Metal transporter Nramp5 [Morus notabilis] 2.7e-07	gi|1030111004|gb|CP015600.1| Pseudomonas antarctica strain PAMC 27494, complete genome 4.95791e-141	-	-	tr|A0A0V0I6N3|A0A0V0I6N3_SOLCH Putative ovule protein OS=Solanum chacoense PE=4 SV=1 2.2e-09	-	-
TRINITY_DN70962_c1_g3	11.704787	1.863904	2.65069921968	0.00338954739959	0.0455334673338	up	-	-	-	gi|1004081644|gb|CP013235.1| Collimonas arenae strain Ter282, complete genome 6.91368e-89	-	-	tr|A0A0V0GKN2|A0A0V0GKN2_SOLCH Putative ovule protein (Fragment) OS=Solanum chacoense PE=4 SV=1 3.7e-07	-	-
TRINITY_DN73886_c2_g1	0.00706626666667	5.915592101330001	-9.709358667510001	8.96109272669e-05	0.00520183825065	down	-	-	gi|1021045493|gb|KZN03274.1| hypothetical protein DCAR_012030 [Daucus carota subsp. sativus] 1.8e-48	-	-	-	-	-	-
TRINITY_DN70144_c2_g1	5.404604333330001	0.9505565666670001	2.5073446154299996	0.00118792074216	0.024418913812899998	up	-	-	-	-	-	-	-	-	-
TRINITY_DN74505_c5_g1	32.1118203333	1.45319576667	4.46580347667	0.000286694859609	0.010647706115299999	up	-	-	-	-	-	-	-	-	-
TRINITY_DN80414_c0_g4	177.89144333299998	21.543595	3.04566619896	1.59670293756e-05	0.00164589551721	up	-	-	gi|1021049463|gb|KZN07243.1| hypothetical protein DCAR_008080 [Daucus carota subsp. sativus] 1.9e-17	gi|747096532|ref|XM_011097890.1| PREDICTED: Sesamum indicum vesicle-associated protein 4-2 (LOC105175451), mRNA 5.47623e-29	-	sp|Q8VYN2|VAP42_ARATH Vesicle-associated protein 4-2 OS=Arabidopsis thaliana GN=PVA42 PE=1 SV=1 2.81238e-18	tr|M0SH13|M0SH13_MUSAM Uncharacterized protein OS=Musa acuminata subsp. malaccensis PE=4 SV=1 3.2e-17	GO:0005789, endoplasmic reticulum membrane	-
TRINITY_DN80414_c0_g3	19.5620666667	4.01896333333	2.28316347396	0.000528267977129	0.015163368533100002	up	-	-	-	-	-	-	-	-	-
TRINITY_DN71554_c0_g1	0.589456966667	5.35013223333	-3.1821161513200003	0.00182127238509	0.0316067485007	down	-	KOG1824, KOG1824, KOG1824, TATA-binding protein-interacting protein [General function prediction only]. 2.57896e-59	gi|802563192|ref|XP_012066762.1| PREDICTED: cullin-associated NEDD8-dissociated protein 1 [Jatropha curcas] 3.5e-108	gi|731411267|ref|XM_010659609.1| PREDICTED: Vitis vinifera cullin-associated NEDD8-dissociated protein 1 (LOC100852578), transcript variant X3, mRNA 4.343e-126	-	sp|Q8L5Y6|CAND1_ARATH Cullin-associated NEDD8-dissociated protein 1 OS=Arabidopsis thaliana GN=CAND1 PE=1 SV=1 5.72515e-125	tr|A0A067LEJ8|A0A067LEJ8_JATCU Uncharacterized protein OS=Jatropha curcas GN=JCGZ_00311 PE=4 SV=1 2.7e-108	GO:0005618, cell wall;GO:0005634, nucleus;GO:0005829, cytosol;GO:0005886, plasma membrane;GO:0006351, transcription, DNA-templated;GO:0006355, regulation of transcription, DNA-templated;GO:0009733, response to auxin;GO:0010051, xylem and phloem pattern formation;GO:0010228, vegetative to reproductive phase transition of meristem;GO:0010265, SCF complex assembly;GO:0016567, protein ubiquitination	-
TRINITY_DN76095_c0_g1	1.08355366667	9.27069066667	-3.09690621411	0.0004931628383809999	0.0145346544885	down	cd14066, STKc_IRAK, Catalytic domain of the Serine/Threonine kinases, Interleukin-1 Receptor Associated Kinases and related STKs. STKs catalyze the transfer of the gamma-phosphoryl group from ATP to serine/threonine residues on protein substrates. IRAKs are involved in Toll-like receptor (TLR) and interleukin-1 (IL-1) signalling pathways, and are thus critical in regulating innate immune response…	KOG1187, KOG1187, KOG1187, Serine/threonine protein kinase [Signal transduction mechanisms]. 1.76017e-17	gi|1021029925|gb|KZM87710.1| hypothetical protein DCAR_024811 [Daucus carota subsp. sativus] 2.8e-133	gi|1025075846|ref|XM_016597765.1| PREDICTED: Nicotiana tabacum inactive receptor-like serine/threonine-protein kinase At2g40270 (LOC107777677), mRNA 1.97252e-86	-	sp|Q9SIZ4|Y2027_ARATH Inactive receptor-like serine/threonine-protein kinase At2g40270 OS=Arabidopsis thaliana GN=At2g40270 PE=2 SV=2 4.44823e-65	tr|A0A059BHJ1|A0A059BHJ1_EUCGR Uncharacterized protein OS=Eucalyptus grandis GN=EUGRSUZ_G03081 PE=4 SV=1 2.1e-104	GO:0004672, protein kinase activity;GO:0005524, ATP binding;GO:0005886, plasma membrane;GO:0016021, integral component of membrane	-
TRINITY_DN83685_c0_g3	0.0001	16.769266666700002	-17.3554600745	0.00020185138129599997	0.00853623709302	down	-	-	gi|1021023141|gb|KZM80941.1| hypothetical protein DCAR_031427 [Daucus carota subsp. sativus] 2.1e-14	-	-	-	-	-	-
TRINITY_DN98196_c1_g4	0.451737666667	17.2172336667	-5.25222433674	0.0008711459627919999	0.0205313353749	down	cd13132, MATE_eukaryotic, Eukaryotic members of the multidrug and toxic compound extrusion (MATE) family. The integral membrane proteins from the MATE family are involved in exporting metabolites across the cell membrane and are responsible for multidrug resistance (MDR) in many bacteria and animals. MATE has also been identified as a large multigene family in plants, where the proteins are linke…	KOG1347, KOG1347, KOG1347, Uncharacterized membrane protein, predicted efflux pump [General function prediction only]. 2.43152e-10	gi|1021031035|gb|KZM88820.1| hypothetical protein DCAR_025895 [Daucus carota subsp. sativus] 1.4e-11	-	-	sp|F4HQ05|DTX8_ARATH Protein DETOXIFICATION 8 OS=Arabidopsis thaliana GN=DTX8 PE=3 SV=1 1.13975e-15	tr|M1D0L8|M1D0L8_SOLTU Uncharacterized protein OS=Solanum tuberosum GN=PGSC0003DMG400030630 PE=4 SV=1 1.7e-09	GO:0006855, drug transmembrane transport;GO:0015238, drug transmembrane transporter activity;GO:0015297, antiporter activity;GO:0016021, integral component of membrane	-
TRINITY_DN97816_c0_g1	0.343709666667	9.219259333330001	-4.74538851805	0.00309259687487	0.043154847519	down	-	-	gi|1021050626|gb|KZN08404.1| hypothetical protein DCAR_000950 [Daucus carota subsp. sativus] 1.2e-15	-	-	sp|Q9S7T8|SPZX_ARATH Serpin-ZX OS=Arabidopsis thaliana GN=At1g47710 PE=1 SV=1 2.41767e-07	tr|B9R7I8|B9R7I8_RICCO Protein Z, putative OS=Ricinus communis GN=RCOM_1591990 PE=3 SV=1 1.1e-08	GO:0004867, serine-type endopeptidase inhibitor activity;GO:0004869, cysteine-type endopeptidase inhibitor activity;GO:0005615, extracellular space;GO:0005737, cytoplasm;GO:0016740, transferase activity;GO:0048046, apoplast	-
TRINITY_DN81310_c0_g3	13.892266666700001	0.8176016666670001	4.0867400617000005	3.8999615455e-06	0.0006104332581	up	-	-	-	-	-	-	-	-	-
TRINITY_DN91821_c1_g2	1.1672696666700002	25.4031553333	-4.443797904649999	1.23141758153e-05	0.00135345502273	down	pfam12166, Piezo_RRas_bdg, Piezo non-specific cation channel, R-Ras-binding domain. This is an extracellular domain at the C-terminus of Piezo, or FAM38 mechanosensitive non-specific cation channel proteins. It seems likely that this region of the Piezo proteins may be responsible for R-Ras recruitment because this region is capable of relocalizing R-Ras to the ER in eukaryotes. 5.48364e-06	-	gi|1024007623|gb|KZV32394.1| hypothetical protein F511_03677 [Dorcoceras hygrometricum] 4.0e-19	gi|769804508|ref|XM_011627535.1| PREDICTED: Amborella trichopoda piezo-type mechanosensitive ion channel homolog (LOC18440663), mRNA 6.76681e-22	pfam12166, Piezo_RRas_bdg, Piezo non-specific cation channel, R-Ras-binding domain. This is an extracellular domain at the C-terminus of Piezo, or FAM38 mechanosensitive non-specific cation channel proteins. It seems likely that this region of the Piezo proteins may be responsible for R-Ras recruitment because this region is capable of relocalizing R-Ras to the ER in eukaryotes. 1.31009e-06	sp|F4IN58|PIEZO_ARATH Piezo-type mechanosensitive ion channel homolog OS=Arabidopsis thaliana GN=At2g48040/At2g48050/At2g48060 PE=2 SV=1 1.23372e-20	tr|A5BIX1|A5BIX1_VITVI Putative uncharacterized protein OS=Vitis vinifera GN=VITISV_031828 PE=4 SV=1 2.5e-18	GO:0008381, mechanosensitive ion channel activity;GO:0016021, integral component of membrane	-
TRINITY_DN74583_c1_g5	16.54359	0.393776666667	5.39275090013	9.829756480500001e-05	0.00552345581059	up	-	-	-	-	-	-	-	-	-
TRINITY_DN78388_c1_g6	1.38028766667	6.407654533330001	-2.21482739603	0.00196254834201	0.0330038763707	down	-	KOG1471, KOG1471, KOG1471, Phosphatidylinositol transfer protein SEC14 and related proteins [Lipid transport and metabolism]. 1.47772e-18	gi|1021051129|gb|KZN08907.1| hypothetical protein DCAR_001563 [Daucus carota subsp. sativus] 1.5e-61	-	-	sp|F4IHJ0|SFH8_ARATH Phosphatidylinositol/phosphatidylcholine transfer protein SFH8 OS=Arabidopsis thaliana GN=SFH8 PE=2 SV=1 8.31349e-62	tr|B9H0T8|B9H0T8_POPTR SEC14 cytosolic factor family protein OS=Populus trichocarpa GN=POPTR_0004s16510g PE=4 SV=1 8.5e-57	GO:0000139, Golgi membrane;GO:0005215, transporter activity;GO:0005622, intracellular;GO:0005886, plasma membrane;GO:0015031, protein transport;GO:0016021, integral component of membrane	-
TRINITY_DN85403_c1_g1	116.84143786700001	17.3070600622	2.7551194363200002	0.00010052949714000001	0.00561450343136	up	smart00774, WRKY, DNA binding domain. The WRKY domain is a DNA binding domain found in one or two copies in a superfamily of plant transcription factors. These transcription factors are involved in the regulation of various physiological programs that are unique to plants, including pathogen defense, senescence and trichome development. The domain is a 60 amino acid region that is defined by the …	-	gi|1021044089|gb|KZN01870.1| hypothetical protein DCAR_010624 [Daucus carota subsp. sativus] 1.7e-107	gi|1000981827|ref|XM_002511862.2| PREDICTED: Ricinus communis probable WRKY transcription factor 53 (LOC8286674), mRNA 5.23307e-25	pfam03106, WRKY, WRKY DNA -binding domain. 1.41611e-19	sp|Q9FL62|WRK30_ARATH Probable WRKY transcription factor 30 OS=Arabidopsis thaliana GN=WRKY30 PE=2 SV=1 1.44768e-34	tr|A0A068U9W8|A0A068U9W8_COFCA Uncharacterized protein OS=Coffea canephora GN=GSCOC_T00020023001 PE=4 SV=1 1.1e-63	GO:0003700, DNA binding transcription factor activity;GO:0005634, nucleus;GO:0005737, cytoplasm;GO:0006351, transcription, DNA-templated;GO:0009751, response to salicylic acid;GO:0010193, response to ozone;GO:0042542, response to hydrogen peroxide;GO:0043565, sequence-specific DNA binding;GO:0044212, transcription regulatory region DNA binding	-
TRINITY_DN80191_c0_g1	57.57251	5.247911	3.4555649526599996	0.00016766886375199999	0.0075950253715	up	-	KOG3389, KOG3389, KOG3389, NADH:ubiquinone oxidoreductase, NDUFS4/18 kDa subunit [Energy production and conversion]. 3.92064e-13	gi|1021042039|gb|KZM99820.1| hypothetical protein DCAR_012818 [Daucus carota subsp. sativus] 1.8e-34	-	-	sp|Q9FJW4|NDUS4_ARATH NADH dehydrogenase [ubiquinone] iron-sulfur protein 4, mitochondrial OS=Arabidopsis thaliana GN=FRO1 PE=2 SV=1 1.0196e-18	tr|V4W7F7|V4W7F7_9ROSI Uncharacterized protein OS=Citrus clementina GN=CICLE_v10017436mg PE=4 SV=1 4.3e-20	GO:0005739, mitochondrion;GO:0005747, mitochondrial respiratory chain complex I;GO:0006970, response to osmotic stress;GO:0008137, NADH dehydrogenase (ubiquinone) activity;GO:0009631, cold acclimation;GO:0016651, oxidoreductase activity, acting on NAD(P)H;GO:0022900, electron transport chain;GO:0050897, cobalt ion binding	K03937-ko00190 Oxidative phosphorylation
TRINITY_DN76544_c1_g2	18.2736936667	0.602597	4.92243097499	0.00123404116398	0.024979623524000003	up	-	-	-	-	-	-	-	-	-
TRINITY_DN82791_c0_g4	6.378063333330001	1.41082333333	2.1765810819099998	0.000953540511678	0.021487206764000004	up	smart00774, WRKY, DNA binding domain. The WRKY domain is a DNA binding domain found in one or two copies in a superfamily of plant transcription factors. These transcription factors are involved in the regulation of various physiological programs that are unique to plants, including pathogen defense, senescence and trichome development. The domain is a 60 amino acid region that is defined by the …	-	gi|1021027801|gb|KZM85588.1| hypothetical protein DCAR_026990 [Daucus carota subsp. sativus] 1.8e-61	gi|1006164455|gb|KU144580.1| Panax ginseng WRKY7 transcription factor mRNA, complete cds 1.64782e-45	pfam03106, WRKY, WRKY DNA -binding domain. 7.81219e-10	sp|Q9C983|WRK57_ARATH Probable WRKY transcription factor 57 OS=Arabidopsis thaliana GN=WRKY57 PE=2 SV=1 5.61059e-21	tr|A0A068TTU0|A0A068TTU0_COFCA Uncharacterized protein OS=Coffea canephora GN=GSCOC_T00025653001 PE=4 SV=1 4.5e-25	GO:0003700, DNA binding transcription factor activity;GO:0005634, nucleus;GO:0006351, transcription, DNA-templated;GO:0006970, response to osmotic stress;GO:0009414, response to water deprivation;GO:0009651, response to salt stress;GO:0043565, sequence-specific DNA binding;GO:0044212, transcription regulatory region DNA binding	-
TRINITY_DN94734_c0_g3	3.40760333333	27.038420000000002	-2.9881815380799996	0.00211533668973	0.0344117018169	down	-	-	gi|1021029595|gb|KZM87380.1| hypothetical protein DCAR_024514 [Daucus carota subsp. sativus] 3.6e-86	-	-	-	tr|A0A068URA7|A0A068URA7_COFCA Uncharacterized protein OS=Coffea canephora GN=GSCOC_T00031965001 PE=4 SV=1 5.0e-80	-	-
TRINITY_DN91214_c0_g2	17.1580353333	0.268378	5.99847414447	0.00031751169184900005	0.011295097576699999	up	-	-	-	-	-	-	-	-	-
TRINITY_DN96006_c2_g2	1.4086	11.8987137333	-3.0784717317699997	0.0007872702704410002	0.019307465608700003	down	-	KOG0734, KOG0734, KOG0734, AAA+-type ATPase containing the peptidase M41 domain [Posttranslational modification, protein turnover, chaperones]. 9.65827e-09	gi|1021052696|gb|KZN10474.1| hypothetical protein DCAR_003130 [Daucus carota subsp. sativus] 3.2e-54	gi|971557772|ref|XM_015310541.1| PREDICTED: Solanum tuberosum ATP-dependent zinc metalloprotease FTSH 4, mitochondrial-like (LOC102591239), transcript variant X2, mRNA 3.23522e-54	-	sp|Q8LQJ8|FTSH5_ORYSJ ATP-dependent zinc metalloprotease FTSH 5, mitochondrial OS=Oryza sativa subsp. japonica GN=FTSH5 PE=3 SV=1 5.67884e-49	tr|A0A067KQI6|A0A067KQI6_JATCU Uncharacterized protein OS=Jatropha curcas GN=JCGZ_07660 PE=3 SV=1 5.4e-46	GO:0004176, ATP-dependent peptidase activity;GO:0004222, metalloendopeptidase activity;GO:0005524, ATP binding;GO:0005739, mitochondrion;GO:0006508, proteolysis;GO:0008237, metallopeptidase activity;GO:0016020, membrane;GO:0046872, metal ion binding	-
TRINITY_DN74440_c0_g1	41.5496933333	1.57002966667	4.72597410382	1.77822269288e-06	0.00034060726899299995	up	-	-	-	-	-	-	-	-	-
TRINITY_DN97178_c1_g1	1.82079583	20.6309418967	-3.50216862454	0.0024666641893800003	0.0376091466055	down	-	-	gi|1021040491|gb|KZM98272.1| hypothetical protein DCAR_014366 [Daucus carota subsp. sativus] 4.3e-37	gi|1026003453|ref|XM_016698088.1| PREDICTED: Capsicum annuum general negative regulator of transcription subunit 3 (LOC107853072), transcript variant X3, mRNA 5.36467e-12	-	sp|Q9ATE5|FBP24_PETHY MADS-box protein FBP24 OS=Petunia hybrida GN=FBP24 PE=1 SV=1 4.17078e-32	tr|K4D4C5|K4D4C5_SOLLC Uncharacterized protein OS=Solanum lycopersicum PE=4 SV=1 3.5e-23	GO:0003677, DNA binding;GO:0003700, DNA binding transcription factor activity;GO:0005634, nucleus;GO:0006351, transcription, DNA-templated;GO:0008360, regulation of cell shape;GO:0048316, seed development;GO:0048481, plant ovule development;GO:0080155, regulation of double fertilization forming a zygote and endosperm;GO:2000029, regulation of proanthocyanidin biosynthetic process	-
TRINITY_DN84713_c0_g4	18.8541933333	2.55395333333	2.88408135786	0.0032934306823000003	0.044699410119099996	up	cd02176, GH16_XET, Xyloglucan endotransglycosylase, member of glycosyl hydrolase family 16. Xyloglucan endotransglycosylases (XETs) cleave and religate xyloglucan polymers in plant cell walls via a transglycosylation mechanism. Xyloglucan is a soluble hemicellulose with a backbone of beta-1,4-linked glucose units, partially substituted with alpha-1,6-linked xylopyranose branches. It binds noncova…	-	gi|1021024283|gb|KZM82071.1| hypothetical protein DCAR_029684 [Daucus carota subsp. sativus] 2.4e-71	gi|593797501|ref|XM_007161727.1| Phaseolus vulgaris hypothetical protein (PHAVU_001G098200g) mRNA, complete cds 1.21455e-45	pfam06955, XET_C, Xyloglucan endo-transglycosylase (XET) C-terminus. This family represents the C-terminus (approximately 60 residues) of plant xyloglucan endo-transglycosylase (XET). Xyloglucan is the predominant hemicellulose in the cell walls of most dicotyledons. With cellulose, it forms a network that strengthens the cell wall. XET catalyzes the splitting of xyloglucan chains and the linking…	sp|Q9XIW1|XTH5_ARATH Probable xyloglucan endotransglucosylase/hydrolase protein 5 OS=Arabidopsis thaliana GN=XTH5 PE=2 SV=1 6.11744e-74	tr|A0A0B0NH20|A0A0B0NH20_GOSAR Xyloglucan endotransglucosylase/hydrolase OS=Gossypium arboreum GN=F383_16627 PE=3 SV=1 1.3e-64	GO:0004553, hydrolase activity, hydrolyzing O-glycosyl compounds;GO:0005618, cell wall;GO:0010411, xyloglucan metabolic process;GO:0016762, xyloglucan:xyloglucosyl transferase activity;GO:0042546, cell wall biogenesis;GO:0048046, apoplast;GO:0071555, cell wall organization	-
TRINITY_DN82071_c0_g2	6.21648523333	0.382067666667	4.02419904233	0.00033577032307	0.0116638445407	up	-	-	gi|1021027442|gb|KZM85229.1| hypothetical protein DCAR_027349 [Daucus carota subsp. sativus] 1.8e-09	-	-	-	-	-	-
TRINITY_DN91041_c0_g4	48.785876	2.74946966667	4.1492382582	0.000763345586627	0.0190052277771	up	-	-	-	-	-	-	-	-	-
TRINITY_DN91041_c0_g5	85.40233333329999	1.1553966666700002	6.20781534449	4.97256179804e-05	0.00354765350005	up	-	-	-	-	-	-	-	-	-
TRINITY_DN91041_c0_g6	902.3989999999999	21.8477533333	5.36820863298	2.1304238720500002e-08	1.19298227118e-05	up	-	-	gi|1021027010|gb|KZM84797.1| hypothetical protein DCAR_027781 [Daucus carota subsp. sativus] 1.0e-23	gi|1025319822|ref|XM_016648040.1| PREDICTED: Nicotiana tabacum small heat shock protein, chloroplastic-like (LOC107821604), mRNA 1.41195e-27	pfam00011, HSP20, Hsp20/alpha crystallin family. Not only do small heat-shock-proteins occur in eukaryotes and prokaryotes but they have also now been shown to occur in cyanobacterial phages as well as their bacterial hosts. 4.8344e-06	sp|Q39818|HS22M_SOYBN Heat shock 22 kDa protein, mitochondrial OS=Glycine max GN=HSP23.9 PE=2 SV=1 4.87499e-22	tr|M5WBW9|M5WBW9_PRUPE Uncharacterized protein OS=Prunus persica GN=PRUPE_ppa011466mg PE=3 SV=1 2.9e-18	GO:0005739, mitochondrion	K13993-ko04141 Protein processing in endoplasmic reticulum
TRINITY_DN91041_c0_g1	59.58993	1.29687933333	5.5219523957000005	7.29154311746e-05	0.00456263883893	up	-	-	-	-	-	-	-	-	-
TRINITY_DN89932_c0_g2	0.0051902	14.4209656667	-11.440090021400001	0.000106582465971	0.00581788003537	down	pfam13966, zf-RVT, zinc-binding in reverse transcriptase. This domain would appear to be a zinc-binding region of a putative reverse transcriptase. 2.65879e-06	-	gi|985457375|ref|XP_015387580.1| PREDICTED: uncharacterized protein LOC107177743 [Citrus sinensis] 1.2e-145	-	pfam13966, zf-RVT, zinc-binding in reverse transcriptase. This domain would appear to be a zinc-binding region of a putative reverse transcriptase. 6.35208e-07	sp|P0C2F6|RNHX1_ARATH Putative ribonuclease H protein At1g65750 OS=Arabidopsis thaliana GN=At1g65750 PE=3 SV=1 1.18318e-43	tr|F4NCI7|F4NCI7_BETVU Uncharacterized protein OS=Beta vulgaris subsp. vulgaris PE=4 SV=1 1.4e-98	GO:0003676, nucleic acid binding;GO:0004523, RNA-DNA hybrid ribonuclease activity;GO:0046872, metal ion binding	-
TRINITY_DN95936_c1_g3	2.95340185839	38.2029611205	-3.69323488915	0.000383440652329	0.012602333160700002	down	PLN03184, PLN03184, chloroplast Hsp70; Provisional. 0.0	KOG0102, KOG0102, KOG0102, Molecular chaperones mortalin/PBP74/GRP75, HSP70 superfamily [Posttranslational modification, protein turnover, chaperones]. 1.13008e-173	gi|1021030467|gb|KZM88252.1| hypothetical protein DCAR_025327 [Daucus carota subsp. sativus] 3.6e-213	gi|747089331|ref|XM_011093996.1| PREDICTED: Sesamum indicum stromal 70 kDa heat shock-related protein, chloroplastic (LOC105172524), mRNA 0.0	pfam00012, HSP70, Hsp70 protein. Hsp70 chaperones help to fold many proteins. Hsp70 assisted folding involves repeated cycles of substrate binding and release. Hsp70 activity is ATP dependent. Hsp70 proteins are made up of two regions: the amino terminus is the ATPase domain and the carboxyl terminus is the substrate binding region. 7.84081e-173	sp|Q02028|HSP7S_PEA Stromal 70 kDa heat shock-related protein, chloroplastic OS=Pisum sativum GN=HSP70 PE=2 SV=1 0.0	tr|B1A010|B1A010_IPONI Chloroplast heat shock protein 70-2 OS=Ipomoea nil PE=2 SV=1 2.3e-207	GO:0005524, ATP binding;GO:0006457, protein folding;GO:0009570, chloroplast stroma	K03283-ko04612 Antigen processing and presentation;ko03040 Spliceosome;ko04213 Longevity regulating pathway - multiple species;ko04010 MAPK signaling pathway;ko04915 Estrogen signaling pathway;ko04141 Protein processing in endoplasmic reticulum;ko04144 Endocytosis
TRINITY_DN95936_c1_g9	4.5443	34.7814666667	-2.9361887844	0.0038006302205900004	0.048514927788699994	down	PLN03184, PLN03184, chloroplast Hsp70; Provisional. 2.13724e-69	KOG0102, KOG0102, KOG0102, Molecular chaperones mortalin/PBP74/GRP75, HSP70 superfamily [Posttranslational modification, protein turnover, chaperones]. 1.30942e-33	gi|1021048050|gb|KZN05830.1| hypothetical protein DCAR_006667 [Daucus carota subsp. sativus] 2.7e-54	gi|743908880|ref|XM_011049603.1| PREDICTED: Populus euphratica stromal 70 kDa heat shock-related protein, chloroplastic-like (LOC105142120), mRNA 1.07375e-103	pfam00012, HSP70, Hsp70 protein. Hsp70 chaperones help to fold many proteins. Hsp70 assisted folding involves repeated cycles of substrate binding and release. Hsp70 activity is ATP dependent. Hsp70 proteins are made up of two regions: the amino terminus is the ATPase domain and the carboxyl terminus is the substrate binding region. 1.31621e-33	sp|Q08080|HSP7S_SPIOL Stromal 70 kDa heat shock-related protein, chloroplastic (Fragment) OS=Spinacia oleracea GN=CHSP70 PE=2 SV=1 1.46529e-68	tr|D3YE92|D3YE92_WHEAT 70 kDa heat shock protein OS=Triticum aestivum PE=2 SV=1 3.6e-54	GO:0005524, ATP binding;GO:0006457, protein folding;GO:0009570, chloroplast stroma	-
TRINITY_DN87704_c0_g2	3.2970773999999996	26.3450370333	-2.99827154745	0.000726376324381	0.0185104852502	down	pfam02309, AUX_IAA, AUX/IAA family. Transcription of the AUX/IAA family of genes is rapidly induced by the plant hormone auxin. Some members of this family are longer and contain an N terminal DNA binding domain. The function of this region is uncertain. 2.70334e-23	-	gi|1021046054|gb|KZN03835.1| hypothetical protein DCAR_012591 [Daucus carota subsp. sativus] 5.4e-75	gi|970052586|ref|XM_015232421.1| PREDICTED: Solanum pennellii auxin-responsive protein IAA13 (LOC107031167), mRNA 1.18667e-29	pfam02309, AUX_IAA, AUX/IAA family. Transcription of the AUX/IAA family of genes is rapidly induced by the plant hormone auxin. Some members of this family are longer and contain an N terminal DNA binding domain. The function of this region is uncertain. 6.4585e-24	sp|Q38831|IAA13_ARATH Auxin-responsive protein IAA13 OS=Arabidopsis thaliana GN=IAA13 PE=1 SV=2 1.42763e-35	tr|F6HZR1|F6HZR1_VITVI Auxin-responsive protein OS=Vitis vinifera GN=VIT_07s0005g04380 PE=3 SV=1 2.1e-42	GO:0003700, DNA binding transcription factor activity;GO:0005634, nucleus;GO:0006351, transcription, DNA-templated;GO:0006355, regulation of transcription, DNA-templated;GO:0009733, response to auxin;GO:0009734, auxin-activated signaling pathway	K14484-ko04075 Plant hormone signal transduction
TRINITY_DN95248_c0_g2	0.9817849000000001	11.1521485333	-3.5057708931900002	7.76855670001e-05	0.00474434524923	down	PLN02307, PLN02307, phosphoglucomutase. 1.52829e-85	KOG0625, KOG0625, KOG0625, Phosphoglucomutase [Carbohydrate transport and metabolism]. 1.3791e-67	gi|1021026604|gb|KZM84391.1| hypothetical protein DCAR_028187 [Daucus carota subsp. sativus] 1.2e-115	gi|985466180|ref|XM_006490226.2| PREDICTED: Citrus sinensis phosphoglucomutase, chloroplastic (LOC102609059), mRNA 0.0	pfam02878, PGM_PMM_I, Phosphoglucomutase/phosphomannomutase, alpha/beta/alpha domain I. 7.89408e-15	sp|Q9SMM0|PGMP_BRANA Phosphoglucomutase, chloroplastic OS=Brassica napus GN=PGMP PE=2 SV=1 2.25567e-116	tr|A0A061FZQ8|A0A061FZQ8_THECC Phosphoglucomutase isoform 2 OS=Theobroma cacao GN=TCM_015041 PE=4 SV=1 1.6e-102	GO:0000287, magnesium ion binding;GO:0004614, phosphoglucomutase activity;GO:0005975, carbohydrate metabolic process;GO:0006006, glucose metabolic process;GO:0009507, chloroplast;GO:0016868, intramolecular transferase activity, phosphotransferases	-
TRINITY_DN76524_c1_g2	0.10171622907299999	12.2698006799	-6.91441811964	2.92447963062e-05	0.00251277015035	down	TIGR01505, 2-hydroxy-3-oxopropionate_reductase, 2-hydroxy-3-oxopropionate reductase. This model represents 2-hydroxy-3-oxopropionate reductase (EC 1.1.1.60), also called tartronate semialdehyde reductase. It follows glyoxylate carboligase and precedes glycerate kinase in D-glycerate pathway of glyoxylate degradation. The eventual product, 3-phosphoglycerate, is an intermediate of glycolysis and i…	KOG0409, KOG0409, KOG0409, Predicted dehydrogenase [General function prediction only]. 5.07688e-70	gi|1021050057|gb|KZN07835.1| hypothetical protein DCAR_000504 [Daucus carota subsp. sativus] 3.3e-145	gi|731438072|ref|XM_002266216.3| PREDICTED: Vitis vinifera glyoxylate/succinic semialdehyde reductase 1 (LOC100246579), mRNA 0.0	pfam03446, NAD_binding_2, NAD binding domain of 6-phosphogluconate dehydrogenase. The NAD binding domain of 6-phosphogluconate dehydrogenase adopts a Rossmann fold. 2.66643e-27	sp|Q9LSV0|GLYR1_ARATH Glyoxylate/succinic semialdehyde reductase 1 OS=Arabidopsis thaliana GN=GLYR1 PE=1 SV=1 8.51801e-160	tr|A0A068U6R1|A0A068U6R1_COFCA Uncharacterized protein OS=Coffea canephora GN=GSCOC_T00016533001 PE=4 SV=1 2.6e-134	GO:0003858, 3-hydroxybutyrate dehydrogenase activity;GO:0004616, phosphogluconate dehydrogenase (decarboxylating) activity;GO:0005829, cytosol;GO:0006979, response to oxidative stress;GO:0030267, glyoxylate reductase (NADP) activity;GO:0051287, NAD binding	K18121-ko01200 Carbon metabolism;ko00630 Glyoxylate and dicarboxylate metabolism;ko00650 Butanoate metabolism
TRINITY_DN97182_c2_g1	2575.99076133	734.739498667	1.8098226800200001	0.0007444177056219999	0.0187568428643	up	-	-	-	-	-	-	-	-	-
TRINITY_DN95632_c3_g2	261.2903212	59.3614686667	2.13805499353	0.000648973862279	0.0171712403959	up	PLN02412, PLN02412, probable glutathione peroxidase. 1.80797e-12	KOG1651, KOG1651, KOG1651, Glutathione peroxidase [Posttranslational modification, protein turnover, chaperones]. 9.16671e-12	gi|311457734|gb|ADP94773.1| glutathione peroxidase-like protein, partial [Picea sitchensis] 5.9e-13	gi|571469435|ref|XM_003532659.2| PREDICTED: Glycine max probable phospholipid hydroperoxide glutathione peroxidase (LOC100306295), mRNA 2.58324e-21	-	sp|O48646|GPX6_ARATH Probable phospholipid hydroperoxide glutathione peroxidase 6, mitochondrial OS=Arabidopsis thaliana GN=GPX6 PE=2 SV=2 5.66973e-14	tr|E5F5X2|E5F5X2_PICSI Glutathione peroxidase (Fragment) OS=Picea sitchensis PE=2 SV=1 4.5e-13	GO:0004602, glutathione peroxidase activity;GO:0005739, mitochondrion;GO:0005829, cytosol;GO:0005886, plasma membrane;GO:0006979, response to oxidative stress;GO:0009507, chloroplast;GO:0009651, response to salt stress;GO:0046686, response to cadmium ion;GO:0047066, phospholipid-hydroperoxide glutathione peroxidase activity;GO:0048046, apoplast	-
TRINITY_DN97798_c1_g3	0.483462666667	6.36936033333	-3.7196720985800003	0.0035784292925	0.0469334204909	down	cd14066, STKc_IRAK, Catalytic domain of the Serine/Threonine kinases, Interleukin-1 Receptor Associated Kinases and related STKs. STKs catalyze the transfer of the gamma-phosphoryl group from ATP to serine/threonine residues on protein substrates. IRAKs are involved in Toll-like receptor (TLR) and interleukin-1 (IL-1) signalling pathways, and are thus critical in regulating innate immune response…	KOG1187, KOG1187, KOG1187, Serine/threonine protein kinase [Signal transduction mechanisms]. 2.77998e-27	gi|1021041838|gb|KZM99619.1| hypothetical protein DCAR_013019 [Daucus carota subsp. sativus] 1.3e-76	-	pfam07714, Pkinase_Tyr, Protein tyrosine kinase. 3.06974e-10	sp|O64477|Y2913_ARATH G-type lectin S-receptor-like serine/threonine-protein kinase At2g19130 OS=Arabidopsis thaliana GN=At2g19130 PE=2 SV=1 3.63248e-44	tr|M5X3N3|M5X3N3_PRUPE Serine/threonine-protein kinase OS=Prunus persica GN=PRUPE_ppa001369mg PE=3 SV=1 2.6e-48	GO:0004674, protein serine/threonine kinase activity;GO:0005516, calmodulin binding;GO:0005524, ATP binding;GO:0005886, plasma membrane;GO:0006468, protein phosphorylation;GO:0016021, integral component of membrane;GO:0030246, carbohydrate binding;GO:0048544, recognition of pollen	-
TRINITY_DN87614_c0_g2	13.3629733333	0.450556833333	4.89038814133	3.87826858862e-07	0.00010812046897499999	up	-	-	-	-	-	-	-	-	-
TRINITY_DN87614_c0_g1	48.2688227333	6.010094166669999	3.00563213968	0.0007188644717160001	0.018399701216	up	-	-	gi|1021025121|gb|KZM82909.1| hypothetical protein DCAR_030478 [Daucus carota subsp. sativus] 1.6e-50	gi|595793342|ref|XM_007200358.1| Prunus persica hypothetical protein (PRUPE_ppa012739mg) mRNA, complete cds 3.33968e-13	-	sp|Q9LZP8|BZP53_ARATH bZIP transcription factor 53 OS=Arabidopsis thaliana GN=BZIP53 PE=1 SV=1 5.02261e-20	tr|A0A067JWD5|A0A067JWD5_JATCU Uncharacterized protein OS=Jatropha curcas GN=JCGZ_14027 PE=4 SV=1 2.0e-16	GO:0003700, DNA binding transcription factor activity;GO:0005634, nucleus;GO:0006351, transcription, DNA-templated;GO:0006971, hypotonic response;GO:0009267, cellular response to starvation;GO:0043565, sequence-specific DNA binding;GO:0045735, nutrient reservoir activity;GO:0045893, positive regulation of transcription, DNA-templated;GO:0046982, protein heterodimerization activity;GO:2000693, pos…	-
[truncated: 2,911 more rows]
