# Supplementary material for: De novo Transcriptome Sequencing Coupled With Co-expression Analysis Reveal the Transcriptional Regulation of Key Genes Involved in the Formation of Active Ingredients in Peucedanum praeruptorum Dunn Under Bolting Period
Source: Frontiers journal article supplement (doi:10.3389/fgene.2021.683037), 2021-06-14
Supplement: Data_Sheet_9.zip [file Data_Sheet_9.zip]

GO.ID	Term	Ontology	Significant	Annotated	Pvalue	Qvalue	Signi_id	Signi_symbol
GO:0007275	multicellular organism development	biological process	118/609	7943/93642	2.4e-17	3.27912e-13	TRINITY_DN68079_c0_g2,TRINITY_DN68255_c0_g1,TRINITY_DN68440_c0_g2,TRINITY_DN70026_c1_g2,TRINITY_DN70156_c0_g5,TRINITY_DN70487_c0_g1,TRINITY_DN70725_c1_g7,TRINITY_DN71042_c0_g1,TRINITY_DN71424_c1_g2,TRINITY_DN71554_c0_g1,TRINITY_DN71558_c1_g1,TRINITY_DN71889_c1_g1,TRINITY_DN73679_c0_g1,TRINITY_DN73679_c1_g2,TRINITY_DN74096_c1_g1,TRINITY_DN74503_c1_g2,TRINITY_DN74691_c0_g3,TRINITY_DN74872_c1_g1,TRI…	TRINITY_DN68079_c0_g2,TRINITY_DN68255_c0_g1,TRINITY_DN68440_c0_g2,TRINITY_DN70026_c1_g2,TRINITY_DN70156_c0_g5,TRINITY_DN70487_c0_g1,TRINITY_DN70725_c1_g7,TRINITY_DN71042_c0_g1,TRINITY_DN71424_c1_g2,TRINITY_DN71554_c0_g1,TRINITY_DN71558_c1_g1,TRINITY_DN71889_c1_g1,TRINITY_DN73679_c0_g1,TRINITY_DN73679_c1_g2,TRINITY_DN74096_c1_g1,TRINITY_DN74503_c1_g2,TRINITY_DN74691_c0_g3,TRINITY_DN74872_c1_g1,TRI…
GO:0009791	post-embryonic development	biological process	73/609	3776/93642	2.1e-16	1.22967e-12	TRINITY_DN68079_c0_g2,TRINITY_DN68255_c0_g1,TRINITY_DN70026_c1_g2,TRINITY_DN70725_c1_g7,TRINITY_DN71554_c0_g1,TRINITY_DN71889_c1_g1,TRINITY_DN73679_c0_g1,TRINITY_DN73679_c1_g2,TRINITY_DN74096_c1_g1,TRINITY_DN74503_c1_g2,TRINITY_DN74691_c0_g3,TRINITY_DN75121_c0_g4,TRINITY_DN75411_c0_g3,TRINITY_DN76045_c0_g1,TRINITY_DN77099_c0_g1,TRINITY_DN77469_c0_g4,TRINITY_DN78319_c0_g1,TRINITY_DN80004_c0_g1,TRI…	TRINITY_DN68079_c0_g2,TRINITY_DN68255_c0_g1,TRINITY_DN70026_c1_g2,TRINITY_DN70725_c1_g7,TRINITY_DN71554_c0_g1,TRINITY_DN71889_c1_g1,TRINITY_DN73679_c0_g1,TRINITY_DN73679_c1_g2,TRINITY_DN74096_c1_g1,TRINITY_DN74503_c1_g2,TRINITY_DN74691_c0_g3,TRINITY_DN75121_c0_g4,TRINITY_DN75411_c0_g3,TRINITY_DN76045_c0_g1,TRINITY_DN77099_c0_g1,TRINITY_DN77469_c0_g4,TRINITY_DN78319_c0_g1,TRINITY_DN80004_c0_g1,TRI…
GO:0032501	multicellular organismal process	biological process	130/609	9507/93642	2.7e-16	1.22967e-12	TRINITY_DN68079_c0_g2,TRINITY_DN68255_c0_g1,TRINITY_DN68440_c0_g2,TRINITY_DN70026_c1_g2,TRINITY_DN70156_c0_g5,TRINITY_DN70487_c0_g1,TRINITY_DN70725_c1_g7,TRINITY_DN70911_c2_g1,TRINITY_DN71042_c0_g1,TRINITY_DN71424_c1_g2,TRINITY_DN71554_c0_g1,TRINITY_DN71558_c1_g1,TRINITY_DN71889_c1_g1,TRINITY_DN73374_c1_g2,TRINITY_DN73679_c0_g1,TRINITY_DN73679_c1_g2,TRINITY_DN74096_c1_g1,TRINITY_DN74503_c1_g2,TRI…	TRINITY_DN68079_c0_g2,TRINITY_DN68255_c0_g1,TRINITY_DN68440_c0_g2,TRINITY_DN70026_c1_g2,TRINITY_DN70156_c0_g5,TRINITY_DN70487_c0_g1,TRINITY_DN70725_c1_g7,TRINITY_DN70911_c2_g1,TRINITY_DN71042_c0_g1,TRINITY_DN71424_c1_g2,TRINITY_DN71554_c0_g1,TRINITY_DN71558_c1_g1,TRINITY_DN71889_c1_g1,TRINITY_DN73374_c1_g2,TRINITY_DN73679_c0_g1,TRINITY_DN73679_c1_g2,TRINITY_DN74096_c1_g1,TRINITY_DN74503_c1_g2,TRI…
GO:0032502	developmental process	biological process	145/609	11279/93642	5.4e-16	1.63956e-12	TRINITY_DN68079_c0_g2,TRINITY_DN68255_c0_g1,TRINITY_DN68440_c0_g2,TRINITY_DN70026_c1_g2,TRINITY_DN70156_c0_g5,TRINITY_DN70487_c0_g1,TRINITY_DN70723_c1_g1,TRINITY_DN70725_c1_g7,TRINITY_DN70911_c2_g1,TRINITY_DN71042_c0_g1,TRINITY_DN71143_c0_g1,TRINITY_DN71424_c1_g2,TRINITY_DN71554_c0_g1,TRINITY_DN71558_c1_g1,TRINITY_DN71889_c1_g1,TRINITY_DN73145_c2_g1,TRINITY_DN73374_c1_g2,TRINITY_DN73679_c0_g1,TRI…	TRINITY_DN68079_c0_g2,TRINITY_DN68255_c0_g1,TRINITY_DN68440_c0_g2,TRINITY_DN70026_c1_g2,TRINITY_DN70156_c0_g5,TRINITY_DN70487_c0_g1,TRINITY_DN70723_c1_g1,TRINITY_DN70725_c1_g7,TRINITY_DN70911_c2_g1,TRINITY_DN71042_c0_g1,TRINITY_DN71143_c0_g1,TRINITY_DN71424_c1_g2,TRINITY_DN71554_c0_g1,TRINITY_DN71558_c1_g1,TRINITY_DN71889_c1_g1,TRINITY_DN73145_c2_g1,TRINITY_DN73374_c1_g2,TRINITY_DN73679_c0_g1,TRI…
GO:0048856	anatomical structure development	biological process	139/609	10611/93642	6.0e-16	1.63956e-12	TRINITY_DN68079_c0_g2,TRINITY_DN68255_c0_g1,TRINITY_DN68440_c0_g2,TRINITY_DN70026_c1_g2,TRINITY_DN70156_c0_g5,TRINITY_DN70487_c0_g1,TRINITY_DN70723_c1_g1,TRINITY_DN70725_c1_g7,TRINITY_DN70911_c2_g1,TRINITY_DN71042_c0_g1,TRINITY_DN71143_c0_g1,TRINITY_DN71424_c1_g2,TRINITY_DN71554_c0_g1,TRINITY_DN71558_c1_g1,TRINITY_DN71889_c1_g1,TRINITY_DN73145_c2_g1,TRINITY_DN73374_c1_g2,TRINITY_DN73679_c0_g1,TRI…	TRINITY_DN68079_c0_g2,TRINITY_DN68255_c0_g1,TRINITY_DN68440_c0_g2,TRINITY_DN70026_c1_g2,TRINITY_DN70156_c0_g5,TRINITY_DN70487_c0_g1,TRINITY_DN70723_c1_g1,TRINITY_DN70725_c1_g7,TRINITY_DN70911_c2_g1,TRINITY_DN71042_c0_g1,TRINITY_DN71143_c0_g1,TRINITY_DN71424_c1_g2,TRINITY_DN71554_c0_g1,TRINITY_DN71558_c1_g1,TRINITY_DN71889_c1_g1,TRINITY_DN73145_c2_g1,TRINITY_DN73374_c1_g2,TRINITY_DN73679_c0_g1,TRI…
GO:0009536	plastid	cellular component	95/648	5858/96716	2.1e-15	3.9816e-12	TRINITY_DN69266_c1_g1,TRINITY_DN70885_c1_g1,TRINITY_DN72688_c0_g2,TRINITY_DN74697_c0_g6,TRINITY_DN74712_c0_g1,TRINITY_DN74872_c1_g1,TRINITY_DN75228_c3_g1,TRINITY_DN75231_c0_g1,TRINITY_DN75580_c0_g1,TRINITY_DN76787_c0_g1,TRINITY_DN77009_c0_g3,TRINITY_DN77049_c0_g3,TRINITY_DN77234_c1_g2,TRINITY_DN77629_c0_g1,TRINITY_DN77910_c1_g1,TRINITY_DN79188_c0_g2,TRINITY_DN79475_c1_g2,TRINITY_DN79570_c1_g1,TRI…	TRINITY_DN69266_c1_g1,TRINITY_DN70885_c1_g1,TRINITY_DN72688_c0_g2,TRINITY_DN74697_c0_g6,TRINITY_DN74712_c0_g1,TRINITY_DN74872_c1_g1,TRINITY_DN75228_c3_g1,TRINITY_DN75231_c0_g1,TRINITY_DN75580_c0_g1,TRINITY_DN76787_c0_g1,TRINITY_DN77009_c0_g3,TRINITY_DN77049_c0_g3,TRINITY_DN77234_c1_g2,TRINITY_DN77629_c0_g1,TRINITY_DN77910_c1_g1,TRINITY_DN79188_c0_g2,TRINITY_DN79475_c1_g2,TRINITY_DN79570_c1_g1,TRI…
GO:0031047	gene silencing by RNA	biological process	29/609	703/93642	7.8e-15	1.77619e-11	TRINITY_DN70421_c0_g1,TRINITY_DN70723_c1_g1,TRINITY_DN71424_c1_g2,TRINITY_DN71889_c1_g1,TRINITY_DN72819_c0_g1,TRINITY_DN73444_c1_g3,TRINITY_DN73493_c1_g1,TRINITY_DN74503_c1_g2,TRINITY_DN74568_c0_g3,TRINITY_DN78805_c1_g1,TRINITY_DN80794_c0_g1,TRINITY_DN83048_c1_g1,TRINITY_DN84296_c1_g1,TRINITY_DN84336_c1_g2,TRINITY_DN88508_c2_g1,TRINITY_DN89410_c0_g2,TRINITY_DN91297_c0_g1,TRINITY_DN91784_c1_g1,TRI…	TRINITY_DN70421_c0_g1,TRINITY_DN70723_c1_g1,TRINITY_DN71424_c1_g2,TRINITY_DN71889_c1_g1,TRINITY_DN72819_c0_g1,TRINITY_DN73444_c1_g3,TRINITY_DN73493_c1_g1,TRINITY_DN74503_c1_g2,TRINITY_DN74568_c0_g3,TRINITY_DN78805_c1_g1,TRINITY_DN80794_c0_g1,TRINITY_DN83048_c1_g1,TRINITY_DN84296_c1_g1,TRINITY_DN84336_c1_g2,TRINITY_DN88508_c2_g1,TRINITY_DN89410_c0_g2,TRINITY_DN91297_c0_g1,TRINITY_DN91784_c1_g1,TRI…
GO:0048608	reproductive structure development	biological process	60/609	3032/93642	4.5e-14	7.6854375e-11	TRINITY_DN68079_c0_g2,TRINITY_DN68255_c0_g1,TRINITY_DN70026_c1_g2,TRINITY_DN70725_c1_g7,TRINITY_DN71554_c0_g1,TRINITY_DN73679_c0_g1,TRINITY_DN74096_c1_g1,TRINITY_DN74691_c0_g3,TRINITY_DN75121_c0_g4,TRINITY_DN75340_c0_g2,TRINITY_DN75340_c0_g3,TRINITY_DN77099_c0_g1,TRINITY_DN77469_c0_g4,TRINITY_DN80004_c0_g1,TRINITY_DN80370_c4_g5,TRINITY_DN80884_c0_g1,TRINITY_DN81128_c3_g1,TRINITY_DN82761_c1_g1,TRI…	TRINITY_DN68079_c0_g2,TRINITY_DN68255_c0_g1,TRINITY_DN70026_c1_g2,TRINITY_DN70725_c1_g7,TRINITY_DN71554_c0_g1,TRINITY_DN73679_c0_g1,TRINITY_DN74096_c1_g1,TRINITY_DN74691_c0_g3,TRINITY_DN75121_c0_g4,TRINITY_DN75340_c0_g2,TRINITY_DN75340_c0_g3,TRINITY_DN77099_c0_g1,TRINITY_DN77469_c0_g4,TRINITY_DN80004_c0_g1,TRINITY_DN80370_c4_g5,TRINITY_DN80884_c0_g1,TRINITY_DN81128_c3_g1,TRINITY_DN82761_c1_g1,TRI…
GO:0061458	reproductive system development	biological process	60/609	3032/93642	4.5e-14	7.6854375e-11	TRINITY_DN68079_c0_g2,TRINITY_DN68255_c0_g1,TRINITY_DN70026_c1_g2,TRINITY_DN70725_c1_g7,TRINITY_DN71554_c0_g1,TRINITY_DN73679_c0_g1,TRINITY_DN74096_c1_g1,TRINITY_DN74691_c0_g3,TRINITY_DN75121_c0_g4,TRINITY_DN75340_c0_g2,TRINITY_DN75340_c0_g3,TRINITY_DN77099_c0_g1,TRINITY_DN77469_c0_g4,TRINITY_DN80004_c0_g1,TRINITY_DN80370_c4_g5,TRINITY_DN80884_c0_g1,TRINITY_DN81128_c3_g1,TRINITY_DN82761_c1_g1,TRI…	TRINITY_DN68079_c0_g2,TRINITY_DN68255_c0_g1,TRINITY_DN70026_c1_g2,TRINITY_DN70725_c1_g7,TRINITY_DN71554_c0_g1,TRINITY_DN73679_c0_g1,TRINITY_DN74096_c1_g1,TRINITY_DN74691_c0_g3,TRINITY_DN75121_c0_g4,TRINITY_DN75340_c0_g2,TRINITY_DN75340_c0_g3,TRINITY_DN77099_c0_g1,TRINITY_DN77469_c0_g4,TRINITY_DN80004_c0_g1,TRINITY_DN80370_c4_g5,TRINITY_DN80884_c0_g1,TRINITY_DN81128_c3_g1,TRINITY_DN82761_c1_g1,TRI…
GO:0048731	system development	biological process	88/609	5735/93642	9.4e-14	1.42702444444444e-10	TRINITY_DN68079_c0_g2,TRINITY_DN68255_c0_g1,TRINITY_DN70026_c1_g2,TRINITY_DN70487_c0_g1,TRINITY_DN70725_c1_g7,TRINITY_DN71554_c0_g1,TRINITY_DN73679_c0_g1,TRINITY_DN73679_c1_g2,TRINITY_DN74096_c1_g1,TRINITY_DN74691_c0_g3,TRINITY_DN74872_c1_g1,TRINITY_DN75121_c0_g4,TRINITY_DN75340_c0_g2,TRINITY_DN75340_c0_g3,TRINITY_DN75411_c0_g3,TRINITY_DN76045_c0_g1,TRINITY_DN77099_c0_g1,TRINITY_DN77469_c0_g4,TRI…	TRINITY_DN68079_c0_g2,TRINITY_DN68255_c0_g1,TRINITY_DN70026_c1_g2,TRINITY_DN70487_c0_g1,TRINITY_DN70725_c1_g7,TRINITY_DN71554_c0_g1,TRINITY_DN73679_c0_g1,TRINITY_DN73679_c1_g2,TRINITY_DN74096_c1_g1,TRINITY_DN74691_c0_g3,TRINITY_DN74872_c1_g1,TRINITY_DN75121_c0_g4,TRINITY_DN75340_c0_g2,TRINITY_DN75340_c0_g3,TRINITY_DN75411_c0_g3,TRINITY_DN76045_c0_g1,TRINITY_DN77099_c0_g1,TRINITY_DN77469_c0_g4,TRI…
GO:0009507	chloroplast	cellular component	88/648	5696/96716	3.8e-13	3.6024e-10	TRINITY_DN69266_c1_g1,TRINITY_DN70885_c1_g1,TRINITY_DN72688_c0_g2,TRINITY_DN74697_c0_g6,TRINITY_DN74712_c0_g1,TRINITY_DN74872_c1_g1,TRINITY_DN75228_c3_g1,TRINITY_DN75231_c0_g1,TRINITY_DN75580_c0_g1,TRINITY_DN76787_c0_g1,TRINITY_DN77009_c0_g3,TRINITY_DN77049_c0_g3,TRINITY_DN77629_c0_g1,TRINITY_DN77910_c1_g1,TRINITY_DN79188_c0_g2,TRINITY_DN79475_c1_g2,TRINITY_DN79655_c1_g1,TRINITY_DN79885_c0_g2,TRI…	TRINITY_DN69266_c1_g1,TRINITY_DN70885_c1_g1,TRINITY_DN72688_c0_g2,TRINITY_DN74697_c0_g6,TRINITY_DN74712_c0_g1,TRINITY_DN74872_c1_g1,TRINITY_DN75228_c3_g1,TRINITY_DN75231_c0_g1,TRINITY_DN75580_c0_g1,TRINITY_DN76787_c0_g1,TRINITY_DN77009_c0_g3,TRINITY_DN77049_c0_g3,TRINITY_DN77629_c0_g1,TRINITY_DN77910_c1_g1,TRINITY_DN79188_c0_g2,TRINITY_DN79475_c1_g2,TRINITY_DN79655_c1_g1,TRINITY_DN79885_c0_g2,TRI…
GO:0003006	developmental process involved in reproduction	biological process	70/609	4085/93642	3.0e-13	4.0989e-10	TRINITY_DN68079_c0_g2,TRINITY_DN68255_c0_g1,TRINITY_DN70026_c1_g2,TRINITY_DN70725_c1_g7,TRINITY_DN70911_c2_g1,TRINITY_DN71554_c0_g1,TRINITY_DN73374_c1_g2,TRINITY_DN73679_c0_g1,TRINITY_DN74096_c1_g1,TRINITY_DN74691_c0_g3,TRINITY_DN75121_c0_g4,TRINITY_DN75340_c0_g2,TRINITY_DN75340_c0_g3,TRINITY_DN77099_c0_g1,TRINITY_DN77469_c0_g4,TRINITY_DN79849_c1_g1,TRINITY_DN80004_c0_g1,TRINITY_DN80370_c4_g5,TRI…	TRINITY_DN68079_c0_g2,TRINITY_DN68255_c0_g1,TRINITY_DN70026_c1_g2,TRINITY_DN70725_c1_g7,TRINITY_DN70911_c2_g1,TRINITY_DN71554_c0_g1,TRINITY_DN73374_c1_g2,TRINITY_DN73679_c0_g1,TRINITY_DN74096_c1_g1,TRINITY_DN74691_c0_g3,TRINITY_DN75121_c0_g4,TRINITY_DN75340_c0_g2,TRINITY_DN75340_c0_g3,TRINITY_DN77099_c0_g1,TRINITY_DN77469_c0_g4,TRINITY_DN79849_c1_g1,TRINITY_DN80004_c0_g1,TRINITY_DN80370_c4_g5,TRI…
GO:0009506	plasmodesma	cellular component	55/648	2934/96716	1.4e-11	6.636e-09	TRINITY_DN69571_c1_g1,TRINITY_DN71284_c1_g1,TRINITY_DN71558_c1_g1,TRINITY_DN71958_c2_g1,TRINITY_DN73324_c3_g1,TRINITY_DN73679_c0_g1,TRINITY_DN74096_c1_g1,TRINITY_DN74295_c2_g1,TRINITY_DN75496_c1_g1,TRINITY_DN75665_c0_g1,TRINITY_DN76130_c0_g2,TRINITY_DN76839_c0_g1,TRINITY_DN76911_c0_g4,TRINITY_DN77049_c0_g3,TRINITY_DN77469_c0_g1,TRINITY_DN78559_c1_g4,TRINITY_DN79885_c0_g2,TRINITY_DN80520_c0_g1,TRI…	TRINITY_DN69571_c1_g1,TRINITY_DN71284_c1_g1,TRINITY_DN71558_c1_g1,TRINITY_DN71958_c2_g1,TRINITY_DN73324_c3_g1,TRINITY_DN73679_c0_g1,TRINITY_DN74096_c1_g1,TRINITY_DN74295_c2_g1,TRINITY_DN75496_c1_g1,TRINITY_DN75665_c0_g1,TRINITY_DN76130_c0_g2,TRINITY_DN76839_c0_g1,TRINITY_DN76911_c0_g4,TRINITY_DN77049_c0_g3,TRINITY_DN77469_c0_g1,TRINITY_DN78559_c1_g4,TRINITY_DN79885_c0_g2,TRINITY_DN80520_c0_g1,TRI…
GO:0055044	symplast	cellular component	55/648	2934/96716	1.4e-11	6.636e-09	TRINITY_DN69571_c1_g1,TRINITY_DN71284_c1_g1,TRINITY_DN71558_c1_g1,TRINITY_DN71958_c2_g1,TRINITY_DN73324_c3_g1,TRINITY_DN73679_c0_g1,TRINITY_DN74096_c1_g1,TRINITY_DN74295_c2_g1,TRINITY_DN75496_c1_g1,TRINITY_DN75665_c0_g1,TRINITY_DN76130_c0_g2,TRINITY_DN76839_c0_g1,TRINITY_DN76911_c0_g4,TRINITY_DN77049_c0_g3,TRINITY_DN77469_c0_g1,TRINITY_DN78559_c1_g4,TRINITY_DN79885_c0_g2,TRINITY_DN80520_c0_g1,TRI…	TRINITY_DN69571_c1_g1,TRINITY_DN71284_c1_g1,TRINITY_DN71558_c1_g1,TRINITY_DN71958_c2_g1,TRINITY_DN73324_c3_g1,TRINITY_DN73679_c0_g1,TRINITY_DN74096_c1_g1,TRINITY_DN74295_c2_g1,TRINITY_DN75496_c1_g1,TRINITY_DN75665_c0_g1,TRINITY_DN76130_c0_g2,TRINITY_DN76839_c0_g1,TRINITY_DN76911_c0_g4,TRINITY_DN77049_c0_g3,TRINITY_DN77469_c0_g1,TRINITY_DN78559_c1_g4,TRINITY_DN79885_c0_g2,TRINITY_DN80520_c0_g1,TRI…
GO:0005911	cell-cell junction	cellular component	56/648	3059/96716	2.3e-11	8.7216e-09	TRINITY_DN69571_c1_g1,TRINITY_DN71284_c1_g1,TRINITY_DN71558_c1_g1,TRINITY_DN71958_c2_g1,TRINITY_DN73324_c3_g1,TRINITY_DN73679_c0_g1,TRINITY_DN74096_c1_g1,TRINITY_DN74295_c2_g1,TRINITY_DN75496_c1_g1,TRINITY_DN75665_c0_g1,TRINITY_DN76130_c0_g2,TRINITY_DN76839_c0_g1,TRINITY_DN76911_c0_g4,TRINITY_DN77049_c0_g3,TRINITY_DN77469_c0_g1,TRINITY_DN78559_c1_g4,TRINITY_DN79885_c0_g2,TRINITY_DN80520_c0_g1,TRI…	TRINITY_DN69571_c1_g1,TRINITY_DN71284_c1_g1,TRINITY_DN71558_c1_g1,TRINITY_DN71958_c2_g1,TRINITY_DN73324_c3_g1,TRINITY_DN73679_c0_g1,TRINITY_DN74096_c1_g1,TRINITY_DN74295_c2_g1,TRINITY_DN75496_c1_g1,TRINITY_DN75665_c0_g1,TRINITY_DN76130_c0_g2,TRINITY_DN76839_c0_g1,TRINITY_DN76911_c0_g4,TRINITY_DN77049_c0_g3,TRINITY_DN77469_c0_g1,TRINITY_DN78559_c1_g4,TRINITY_DN79885_c0_g2,TRINITY_DN80520_c0_g1,TRI…
GO:0048367	shoot system development	biological process	45/609	2121/93642	8.2e-12	1.01851454545455e-08	TRINITY_DN68079_c0_g2,TRINITY_DN68255_c0_g1,TRINITY_DN70026_c1_g2,TRINITY_DN70487_c0_g1,TRINITY_DN70725_c1_g7,TRINITY_DN73679_c0_g1,TRINITY_DN74096_c1_g1,TRINITY_DN74872_c1_g1,TRINITY_DN75121_c0_g4,TRINITY_DN76045_c0_g1,TRINITY_DN77099_c0_g1,TRINITY_DN77469_c0_g4,TRINITY_DN80370_c4_g5,TRINITY_DN80884_c0_g1,TRINITY_DN81128_c3_g1,TRINITY_DN82801_c0_g1,TRINITY_DN83047_c1_g1,TRINITY_DN83719_c0_g4,TRI…	TRINITY_DN68079_c0_g2,TRINITY_DN68255_c0_g1,TRINITY_DN70026_c1_g2,TRINITY_DN70487_c0_g1,TRINITY_DN70725_c1_g7,TRINITY_DN73679_c0_g1,TRINITY_DN74096_c1_g1,TRINITY_DN74872_c1_g1,TRINITY_DN75121_c0_g4,TRINITY_DN76045_c0_g1,TRINITY_DN77099_c0_g1,TRINITY_DN77469_c0_g4,TRINITY_DN80370_c4_g5,TRINITY_DN80884_c0_g1,TRINITY_DN81128_c3_g1,TRINITY_DN82801_c0_g1,TRINITY_DN83047_c1_g1,TRINITY_DN83719_c0_g4,TRI…
GO:0016458	gene silencing	biological process	32/609	1217/93642	5.0e-11	5.69291666666667e-08	TRINITY_DN70421_c0_g1,TRINITY_DN70723_c1_g1,TRINITY_DN71424_c1_g2,TRINITY_DN71889_c1_g1,TRINITY_DN72819_c0_g1,TRINITY_DN73444_c1_g3,TRINITY_DN73493_c1_g1,TRINITY_DN74503_c1_g2,TRINITY_DN74568_c0_g3,TRINITY_DN78805_c1_g1,TRINITY_DN80794_c0_g1,TRINITY_DN83047_c1_g1,TRINITY_DN83048_c1_g1,TRINITY_DN84296_c1_g1,TRINITY_DN84336_c1_g2,TRINITY_DN88508_c2_g1,TRINITY_DN89410_c0_g2,TRINITY_DN91297_c0_g1,TRI…	TRINITY_DN70421_c0_g1,TRINITY_DN70723_c1_g1,TRINITY_DN71424_c1_g2,TRINITY_DN71889_c1_g1,TRINITY_DN72819_c0_g1,TRINITY_DN73444_c1_g3,TRINITY_DN73493_c1_g1,TRINITY_DN74503_c1_g2,TRINITY_DN74568_c0_g3,TRINITY_DN78805_c1_g1,TRINITY_DN80794_c0_g1,TRINITY_DN83047_c1_g1,TRINITY_DN83048_c1_g1,TRINITY_DN84296_c1_g1,TRINITY_DN84336_c1_g2,TRINITY_DN88508_c2_g1,TRINITY_DN89410_c0_g2,TRINITY_DN91297_c0_g1,TRI…
GO:0044434	chloroplast part	cellular component	53/648	2989/96716	2.5e-10	7.9e-08	TRINITY_DN70885_c1_g1,TRINITY_DN72688_c0_g2,TRINITY_DN74697_c0_g6,TRINITY_DN74712_c0_g1,TRINITY_DN75228_c3_g1,TRINITY_DN77629_c0_g1,TRINITY_DN79475_c1_g2,TRINITY_DN79655_c1_g1,TRINITY_DN81308_c1_g1,TRINITY_DN81660_c3_g2,TRINITY_DN82502_c0_g1,TRINITY_DN82502_c0_g3,TRINITY_DN82775_c4_g1,TRINITY_DN82963_c1_g4,TRINITY_DN83303_c2_g2,TRINITY_DN83719_c0_g4,TRINITY_DN85213_c0_g1,TRINITY_DN85750_c2_g1,TRI…	TRINITY_DN70885_c1_g1,TRINITY_DN72688_c0_g2,TRINITY_DN74697_c0_g6,TRINITY_DN74712_c0_g1,TRINITY_DN75228_c3_g1,TRINITY_DN77629_c0_g1,TRINITY_DN79475_c1_g2,TRINITY_DN79655_c1_g1,TRINITY_DN81308_c1_g1,TRINITY_DN81660_c3_g2,TRINITY_DN82502_c0_g1,TRINITY_DN82502_c0_g3,TRINITY_DN82775_c4_g1,TRINITY_DN82963_c1_g4,TRINITY_DN83303_c2_g2,TRINITY_DN83719_c0_g4,TRINITY_DN85213_c0_g1,TRINITY_DN85750_c2_g1,TRI…
GO:0009605	response to external stimulus	biological process	76/609	5265/93642	9.6e-11	1.00896e-07	TRINITY_DN66987_c0_g1,TRINITY_DN68475_c0_g1,TRINITY_DN68475_c0_g3,TRINITY_DN70599_c1_g3,TRINITY_DN70911_c2_g1,TRINITY_DN71424_c1_g2,TRINITY_DN71558_c1_g1,TRINITY_DN71889_c1_g1,TRINITY_DN72303_c0_g1,TRINITY_DN72866_c0_g3,TRINITY_DN73324_c3_g1,TRINITY_DN73374_c1_g2,TRINITY_DN73444_c1_g3,TRINITY_DN74096_c1_g1,TRINITY_DN74503_c1_g2,TRINITY_DN74996_c0_g1,TRINITY_DN75228_c3_g1,TRINITY_DN75340_c0_g3,TRI…	TRINITY_DN66987_c0_g1,TRINITY_DN68475_c0_g1,TRINITY_DN68475_c0_g3,TRINITY_DN70599_c1_g3,TRINITY_DN70911_c2_g1,TRINITY_DN71424_c1_g2,TRINITY_DN71558_c1_g1,TRINITY_DN71889_c1_g1,TRINITY_DN72303_c0_g1,TRINITY_DN72866_c0_g3,TRINITY_DN73324_c3_g1,TRINITY_DN73374_c1_g2,TRINITY_DN73444_c1_g3,TRINITY_DN74096_c1_g1,TRINITY_DN74503_c1_g2,TRINITY_DN74996_c0_g1,TRINITY_DN75228_c3_g1,TRINITY_DN75340_c0_g3,TRI…
GO:0044435	plastid part	cellular component	53/648	3032/96716	4.1e-10	1.11051428571429e-07	TRINITY_DN70885_c1_g1,TRINITY_DN72688_c0_g2,TRINITY_DN74697_c0_g6,TRINITY_DN74712_c0_g1,TRINITY_DN75228_c3_g1,TRINITY_DN77629_c0_g1,TRINITY_DN79475_c1_g2,TRINITY_DN79655_c1_g1,TRINITY_DN81308_c1_g1,TRINITY_DN81660_c3_g2,TRINITY_DN82502_c0_g1,TRINITY_DN82502_c0_g3,TRINITY_DN82775_c4_g1,TRINITY_DN82963_c1_g4,TRINITY_DN83303_c2_g2,TRINITY_DN83719_c0_g4,TRINITY_DN85213_c0_g1,TRINITY_DN85750_c2_g1,TRI…	TRINITY_DN70885_c1_g1,TRINITY_DN72688_c0_g2,TRINITY_DN74697_c0_g6,TRINITY_DN74712_c0_g1,TRINITY_DN75228_c3_g1,TRINITY_DN77629_c0_g1,TRINITY_DN79475_c1_g2,TRINITY_DN79655_c1_g1,TRINITY_DN81308_c1_g1,TRINITY_DN81660_c3_g2,TRINITY_DN82502_c0_g1,TRINITY_DN82502_c0_g3,TRINITY_DN82775_c4_g1,TRINITY_DN82963_c1_g4,TRINITY_DN83303_c2_g2,TRINITY_DN83719_c0_g4,TRINITY_DN85213_c0_g1,TRINITY_DN85750_c2_g1,TRI…
GO:0030054	cell junction	cellular component	56/648	3352/96716	6.6e-10	1.5642e-07	TRINITY_DN69571_c1_g1,TRINITY_DN71284_c1_g1,TRINITY_DN71558_c1_g1,TRINITY_DN71958_c2_g1,TRINITY_DN73324_c3_g1,TRINITY_DN73679_c0_g1,TRINITY_DN74096_c1_g1,TRINITY_DN74295_c2_g1,TRINITY_DN75496_c1_g1,TRINITY_DN75665_c0_g1,TRINITY_DN76130_c0_g2,TRINITY_DN76839_c0_g1,TRINITY_DN76911_c0_g4,TRINITY_DN77049_c0_g3,TRINITY_DN77469_c0_g1,TRINITY_DN78559_c1_g4,TRINITY_DN79885_c0_g2,TRINITY_DN80520_c0_g1,TRI…	TRINITY_DN69571_c1_g1,TRINITY_DN71284_c1_g1,TRINITY_DN71558_c1_g1,TRINITY_DN71958_c2_g1,TRINITY_DN73324_c3_g1,TRINITY_DN73679_c0_g1,TRINITY_DN74096_c1_g1,TRINITY_DN74295_c2_g1,TRINITY_DN75496_c1_g1,TRINITY_DN75665_c0_g1,TRINITY_DN76130_c0_g2,TRINITY_DN76839_c0_g1,TRINITY_DN76911_c0_g4,TRINITY_DN77049_c0_g3,TRINITY_DN77469_c0_g1,TRINITY_DN78559_c1_g4,TRINITY_DN79885_c0_g2,TRINITY_DN80520_c0_g1,TRI…
GO:0010033	response to organic substance	biological process	87/609	6558/93642	2.5e-10	2.43982142857143e-07	TRINITY_DN68434_c0_g1,TRINITY_DN68475_c0_g1,TRINITY_DN68475_c0_g3,TRINITY_DN68532_c1_g1,TRINITY_DN69399_c0_g2,TRINITY_DN70026_c1_g2,TRINITY_DN70599_c1_g3,TRINITY_DN70723_c1_g1,TRINITY_DN71306_c1_g4,TRINITY_DN71554_c0_g1,TRINITY_DN71889_c1_g1,TRINITY_DN71958_c2_g1,TRINITY_DN72303_c0_g1,TRINITY_DN72819_c0_g1,TRINITY_DN72866_c0_g3,TRINITY_DN72989_c0_g1,TRINITY_DN73324_c3_g1,TRINITY_DN74096_c1_g1,TRI…	TRINITY_DN68434_c0_g1,TRINITY_DN68475_c0_g1,TRINITY_DN68475_c0_g3,TRINITY_DN68532_c1_g1,TRINITY_DN69399_c0_g2,TRINITY_DN70026_c1_g2,TRINITY_DN70599_c1_g3,TRINITY_DN70723_c1_g1,TRINITY_DN71306_c1_g4,TRINITY_DN71554_c0_g1,TRINITY_DN71889_c1_g1,TRINITY_DN71958_c2_g1,TRINITY_DN72303_c0_g1,TRINITY_DN72819_c0_g1,TRINITY_DN72866_c0_g3,TRINITY_DN72989_c0_g1,TRINITY_DN73324_c3_g1,TRINITY_DN74096_c1_g1,TRI…
GO:0009908	flower development	biological process	30/609	1242/93642	1.5e-09	1.3663e-06	TRINITY_DN68255_c0_g1,TRINITY_DN70026_c1_g2,TRINITY_DN70725_c1_g7,TRINITY_DN73679_c0_g1,TRINITY_DN74096_c1_g1,TRINITY_DN75121_c0_g4,TRINITY_DN77099_c0_g1,TRINITY_DN77469_c0_g4,TRINITY_DN80370_c4_g5,TRINITY_DN81128_c3_g1,TRINITY_DN82801_c0_g1,TRINITY_DN83719_c0_g4,TRINITY_DN84175_c3_g2,TRINITY_DN84523_c1_g1,TRINITY_DN85750_c2_g1,TRINITY_DN87544_c1_g3,TRINITY_DN90620_c1_g1,TRINITY_DN92488_c0_g1,TRI…	TRINITY_DN68255_c0_g1,TRINITY_DN70026_c1_g2,TRINITY_DN70725_c1_g7,TRINITY_DN73679_c0_g1,TRINITY_DN74096_c1_g1,TRINITY_DN75121_c0_g4,TRINITY_DN77099_c0_g1,TRINITY_DN77469_c0_g4,TRINITY_DN80370_c4_g5,TRINITY_DN81128_c3_g1,TRINITY_DN82801_c0_g1,TRINITY_DN83719_c0_g4,TRINITY_DN84175_c3_g2,TRINITY_DN84523_c1_g1,TRINITY_DN85750_c2_g1,TRINITY_DN87544_c1_g3,TRINITY_DN90620_c1_g1,TRINITY_DN92488_c0_g1,TRI…
GO:0099513	polymeric cytoskeletal fiber	cellular component	28/648	1164/96716	1.1e-08	2.31733333333333e-06	TRINITY_DN72905_c0_g4,TRINITY_DN73679_c1_g2,TRINITY_DN74512_c3_g1,TRINITY_DN75496_c1_g1,TRINITY_DN77234_c1_g2,TRINITY_DN77469_c0_g1,TRINITY_DN79570_c1_g1,TRINITY_DN79731_c0_g1,TRINITY_DN80494_c0_g1,TRINITY_DN80532_c2_g2,TRINITY_DN81644_c0_g1,TRINITY_DN82769_c1_g2,TRINITY_DN84678_c0_g1,TRINITY_DN89157_c0_g1,TRINITY_DN90122_c0_g1,TRINITY_DN90376_c0_g3,TRINITY_DN91033_c2_g2,TRINITY_DN92330_c1_g2,TRI…	TRINITY_DN72905_c0_g4,TRINITY_DN73679_c1_g2,TRINITY_DN74512_c3_g1,TRINITY_DN75496_c1_g1,TRINITY_DN77234_c1_g2,TRINITY_DN77469_c0_g1,TRINITY_DN79570_c1_g1,TRINITY_DN79731_c0_g1,TRINITY_DN80494_c0_g1,TRINITY_DN80532_c2_g2,TRINITY_DN81644_c0_g1,TRINITY_DN82769_c1_g2,TRINITY_DN84678_c0_g1,TRINITY_DN89157_c0_g1,TRINITY_DN90122_c0_g1,TRINITY_DN90376_c0_g3,TRINITY_DN91033_c2_g2,TRINITY_DN92330_c1_g2,TRI…
GO:0071669	plant-type cell wall organization or biogenesis	biological process	19/609	524/93642	2.8e-09	2.391025e-06	TRINITY_DN64594_c0_g1,TRINITY_DN68532_c1_g1,TRINITY_DN80065_c0_g3,TRINITY_DN80415_c0_g1,TRINITY_DN80965_c0_g4,TRINITY_DN82458_c1_g1,TRINITY_DN82528_c0_g1,TRINITY_DN86350_c0_g1,TRINITY_DN86350_c0_g2,TRINITY_DN88959_c0_g1,TRINITY_DN89487_c0_g3,TRINITY_DN90918_c0_g2,TRINITY_DN91323_c1_g5,TRINITY_DN91736_c1_g1,TRINITY_DN92233_c0_g2,TRINITY_DN92410_c0_g3,TRINITY_DN96892_c2_g1,TRINITY_DN98258_c0_g1,TRI…	TRINITY_DN64594_c0_g1,TRINITY_DN68532_c1_g1,TRINITY_DN80065_c0_g3,TRINITY_DN80415_c0_g1,TRINITY_DN80965_c0_g4,TRINITY_DN82458_c1_g1,TRINITY_DN82528_c0_g1,TRINITY_DN86350_c0_g1,TRINITY_DN86350_c0_g2,TRINITY_DN88959_c0_g1,TRINITY_DN89487_c0_g3,TRINITY_DN90918_c0_g2,TRINITY_DN91323_c1_g5,TRINITY_DN91736_c1_g1,TRINITY_DN92233_c0_g2,TRINITY_DN92410_c0_g3,TRINITY_DN96892_c2_g1,TRINITY_DN98258_c0_g1,TRI…
GO:0010468	regulation of gene expression	biological process	118/609	10537/93642	3.1e-09	2.49148823529412e-06	TRINITY_DN66987_c0_g1,TRINITY_DN68255_c0_g1,TRINITY_DN70026_c1_g2,TRINITY_DN70421_c0_g1,TRINITY_DN70487_c0_g1,TRINITY_DN70723_c1_g1,TRINITY_DN70831_c1_g2,TRINITY_DN71424_c1_g2,TRINITY_DN71554_c0_g1,TRINITY_DN71855_c4_g2,TRINITY_DN71889_c1_g1,TRINITY_DN72303_c0_g1,TRINITY_DN72819_c0_g1,TRINITY_DN73324_c3_g1,TRINITY_DN73444_c1_g3,TRINITY_DN73493_c1_g1,TRINITY_DN74503_c1_g2,TRINITY_DN74568_c0_g3,TRI…	TRINITY_DN66987_c0_g1,TRINITY_DN68255_c0_g1,TRINITY_DN70026_c1_g2,TRINITY_DN70421_c0_g1,TRINITY_DN70487_c0_g1,TRINITY_DN70723_c1_g1,TRINITY_DN70831_c1_g2,TRINITY_DN71424_c1_g2,TRINITY_DN71554_c0_g1,TRINITY_DN71855_c4_g2,TRINITY_DN71889_c1_g1,TRINITY_DN72303_c0_g1,TRINITY_DN72819_c0_g1,TRINITY_DN73324_c3_g1,TRINITY_DN73444_c1_g3,TRINITY_DN73493_c1_g1,TRINITY_DN74503_c1_g2,TRINITY_DN74568_c0_g3,TRI…
GO:0022414	reproductive process	biological process	82/609	6365/93642	3.4e-09	2.58078888888889e-06	TRINITY_DN68079_c0_g2,TRINITY_DN68255_c0_g1,TRINITY_DN70026_c1_g2,TRINITY_DN70725_c1_g7,TRINITY_DN70911_c2_g1,TRINITY_DN71554_c0_g1,TRINITY_DN73374_c1_g2,TRINITY_DN73679_c0_g1,TRINITY_DN74096_c1_g1,TRINITY_DN74691_c0_g3,TRINITY_DN75121_c0_g4,TRINITY_DN75340_c0_g2,TRINITY_DN75340_c0_g3,TRINITY_DN77099_c0_g1,TRINITY_DN77469_c0_g4,TRINITY_DN78559_c1_g4,TRINITY_DN79849_c1_g1,TRINITY_DN80004_c0_g1,TRI…	TRINITY_DN68079_c0_g2,TRINITY_DN68255_c0_g1,TRINITY_DN70026_c1_g2,TRINITY_DN70725_c1_g7,TRINITY_DN70911_c2_g1,TRINITY_DN71554_c0_g1,TRINITY_DN73374_c1_g2,TRINITY_DN73679_c0_g1,TRINITY_DN74096_c1_g1,TRINITY_DN74691_c0_g3,TRINITY_DN75121_c0_g4,TRINITY_DN75340_c0_g2,TRINITY_DN75340_c0_g3,TRINITY_DN77099_c0_g1,TRINITY_DN77469_c0_g4,TRINITY_DN78559_c1_g4,TRINITY_DN79849_c1_g1,TRINITY_DN80004_c0_g1,TRI…
GO:0090567	reproductive shoot system development	biological process	30/609	1304/93642	4.4e-09	3.16406315789474e-06	TRINITY_DN68255_c0_g1,TRINITY_DN70026_c1_g2,TRINITY_DN70725_c1_g7,TRINITY_DN73679_c0_g1,TRINITY_DN74096_c1_g1,TRINITY_DN75121_c0_g4,TRINITY_DN77099_c0_g1,TRINITY_DN77469_c0_g4,TRINITY_DN80370_c4_g5,TRINITY_DN81128_c3_g1,TRINITY_DN82801_c0_g1,TRINITY_DN83719_c0_g4,TRINITY_DN84175_c3_g2,TRINITY_DN84523_c1_g1,TRINITY_DN85750_c2_g1,TRINITY_DN87544_c1_g3,TRINITY_DN90620_c1_g1,TRINITY_DN92488_c0_g1,TRI…	TRINITY_DN68255_c0_g1,TRINITY_DN70026_c1_g2,TRINITY_DN70725_c1_g7,TRINITY_DN73679_c0_g1,TRINITY_DN74096_c1_g1,TRINITY_DN75121_c0_g4,TRINITY_DN77099_c0_g1,TRINITY_DN77469_c0_g4,TRINITY_DN80370_c4_g5,TRINITY_DN81128_c3_g1,TRINITY_DN82801_c0_g1,TRINITY_DN83719_c0_g4,TRINITY_DN84175_c3_g2,TRINITY_DN84523_c1_g1,TRINITY_DN85750_c2_g1,TRINITY_DN87544_c1_g3,TRINITY_DN90620_c1_g1,TRINITY_DN92488_c0_g1,TRI…
GO:0050789	regulation of biological process	biological process	222/609	24233/93642	5.1e-09	3.484065e-06	TRINITY_DN66987_c0_g1,TRINITY_DN68255_c0_g1,TRINITY_DN68434_c0_g1,TRINITY_DN68532_c1_g1,TRINITY_DN69399_c0_g2,TRINITY_DN69726_c2_g1,TRINITY_DN70026_c1_g2,TRINITY_DN70421_c0_g1,TRINITY_DN70487_c0_g1,TRINITY_DN70723_c1_g1,TRINITY_DN70831_c1_g2,TRINITY_DN70911_c2_g1,TRINITY_DN71143_c0_g1,TRINITY_DN71306_c1_g4,TRINITY_DN71424_c1_g2,TRINITY_DN71554_c0_g1,TRINITY_DN71558_c1_g1,TRINITY_DN71855_c4_g2,TRI…	TRINITY_DN66987_c0_g1,TRINITY_DN68255_c0_g1,TRINITY_DN68434_c0_g1,TRINITY_DN68532_c1_g1,TRINITY_DN69399_c0_g2,TRINITY_DN69726_c2_g1,TRINITY_DN70026_c1_g2,TRINITY_DN70421_c0_g1,TRINITY_DN70487_c0_g1,TRINITY_DN70723_c1_g1,TRINITY_DN70831_c1_g2,TRINITY_DN70911_c2_g1,TRINITY_DN71143_c0_g1,TRINITY_DN71306_c1_g4,TRINITY_DN71424_c1_g2,TRINITY_DN71554_c0_g1,TRINITY_DN71558_c1_g1,TRINITY_DN71855_c4_g2,TRI…
GO:0005874	microtubule	cellular component	26/648	1058/96716	2.3e-08	4.3608e-06	TRINITY_DN73679_c1_g2,TRINITY_DN74512_c3_g1,TRINITY_DN75496_c1_g1,TRINITY_DN77234_c1_g2,TRINITY_DN77469_c0_g1,TRINITY_DN79570_c1_g1,TRINITY_DN79731_c0_g1,TRINITY_DN80494_c0_g1,TRINITY_DN80532_c2_g2,TRINITY_DN81644_c0_g1,TRINITY_DN82769_c1_g2,TRINITY_DN84678_c0_g1,TRINITY_DN89157_c0_g1,TRINITY_DN90122_c0_g1,TRINITY_DN90376_c0_g3,TRINITY_DN91033_c2_g2,TRINITY_DN92330_c1_g2,TRINITY_DN92678_c1_g2,TRI…	TRINITY_DN73679_c1_g2,TRINITY_DN74512_c3_g1,TRINITY_DN75496_c1_g1,TRINITY_DN77234_c1_g2,TRINITY_DN77469_c0_g1,TRINITY_DN79570_c1_g1,TRINITY_DN79731_c0_g1,TRINITY_DN80494_c0_g1,TRINITY_DN80532_c2_g2,TRINITY_DN81644_c0_g1,TRINITY_DN82769_c1_g2,TRINITY_DN84678_c0_g1,TRINITY_DN89157_c0_g1,TRINITY_DN90122_c0_g1,TRINITY_DN90376_c0_g3,TRINITY_DN91033_c2_g2,TRINITY_DN92330_c1_g2,TRINITY_DN92678_c1_g2,TRI…
GO:0009719	response to endogenous stimulus	biological process	62/609	4322/93642	7.6e-09	4.94470476190476e-06	TRINITY_DN68434_c0_g1,TRINITY_DN68532_c1_g1,TRINITY_DN69399_c0_g2,TRINITY_DN70026_c1_g2,TRINITY_DN71306_c1_g4,TRINITY_DN71554_c0_g1,TRINITY_DN71958_c2_g1,TRINITY_DN72303_c0_g1,TRINITY_DN72989_c0_g1,TRINITY_DN73324_c3_g1,TRINITY_DN74096_c1_g1,TRINITY_DN74568_c0_g3,TRINITY_DN74996_c0_g1,TRINITY_DN75228_c3_g1,TRINITY_DN75411_c0_g3,TRINITY_DN76045_c0_g1,TRINITY_DN77049_c0_g3,TRINITY_DN77469_c0_g4,TRI…	TRINITY_DN68434_c0_g1,TRINITY_DN68532_c1_g1,TRINITY_DN69399_c0_g2,TRINITY_DN70026_c1_g2,TRINITY_DN71306_c1_g4,TRINITY_DN71554_c0_g1,TRINITY_DN71958_c2_g1,TRINITY_DN72303_c0_g1,TRINITY_DN72989_c0_g1,TRINITY_DN73324_c3_g1,TRINITY_DN74096_c1_g1,TRINITY_DN74568_c0_g3,TRINITY_DN74996_c0_g1,TRINITY_DN75228_c3_g1,TRINITY_DN75411_c0_g3,TRINITY_DN76045_c0_g1,TRINITY_DN77049_c0_g3,TRINITY_DN77469_c0_g4,TRI…
GO:0099080	supramolecular complex	cellular component	29/648	1310/96716	3.5e-08	5.10461538461538e-06	TRINITY_DN72905_c0_g4,TRINITY_DN73679_c1_g2,TRINITY_DN74512_c3_g1,TRINITY_DN75496_c1_g1,TRINITY_DN77234_c1_g2,TRINITY_DN77433_c0_g1,TRINITY_DN77469_c0_g1,TRINITY_DN79570_c1_g1,TRINITY_DN79731_c0_g1,TRINITY_DN80494_c0_g1,TRINITY_DN80532_c2_g2,TRINITY_DN81644_c0_g1,TRINITY_DN82769_c1_g2,TRINITY_DN84678_c0_g1,TRINITY_DN89157_c0_g1,TRINITY_DN90122_c0_g1,TRINITY_DN90376_c0_g3,TRINITY_DN91033_c2_g2,TRI…	TRINITY_DN72905_c0_g4,TRINITY_DN73679_c1_g2,TRINITY_DN74512_c3_g1,TRINITY_DN75496_c1_g1,TRINITY_DN77234_c1_g2,TRINITY_DN77433_c0_g1,TRINITY_DN77469_c0_g1,TRINITY_DN79570_c1_g1,TRINITY_DN79731_c0_g1,TRINITY_DN80494_c0_g1,TRINITY_DN80532_c2_g2,TRINITY_DN81644_c0_g1,TRINITY_DN82769_c1_g2,TRINITY_DN84678_c0_g1,TRINITY_DN89157_c0_g1,TRINITY_DN90122_c0_g1,TRINITY_DN90376_c0_g3,TRINITY_DN91033_c2_g2,TRI…
GO:0099081	supramolecular polymer	cellular component	29/648	1310/96716	3.5e-08	5.10461538461538e-06	TRINITY_DN72905_c0_g4,TRINITY_DN73679_c1_g2,TRINITY_DN74512_c3_g1,TRINITY_DN75496_c1_g1,TRINITY_DN77234_c1_g2,TRINITY_DN77433_c0_g1,TRINITY_DN77469_c0_g1,TRINITY_DN79570_c1_g1,TRINITY_DN79731_c0_g1,TRINITY_DN80494_c0_g1,TRINITY_DN80532_c2_g2,TRINITY_DN81644_c0_g1,TRINITY_DN82769_c1_g2,TRINITY_DN84678_c0_g1,TRINITY_DN89157_c0_g1,TRINITY_DN90122_c0_g1,TRINITY_DN90376_c0_g3,TRINITY_DN91033_c2_g2,TRI…	TRINITY_DN72905_c0_g4,TRINITY_DN73679_c1_g2,TRINITY_DN74512_c3_g1,TRINITY_DN75496_c1_g1,TRINITY_DN77234_c1_g2,TRINITY_DN77433_c0_g1,TRINITY_DN77469_c0_g1,TRINITY_DN79570_c1_g1,TRINITY_DN79731_c0_g1,TRINITY_DN80494_c0_g1,TRINITY_DN80532_c2_g2,TRINITY_DN81644_c0_g1,TRINITY_DN82769_c1_g2,TRINITY_DN84678_c0_g1,TRINITY_DN89157_c0_g1,TRINITY_DN90122_c0_g1,TRINITY_DN90376_c0_g3,TRINITY_DN91033_c2_g2,TRI…
GO:0099512	supramolecular fiber	cellular component	29/648	1310/96716	3.5e-08	5.10461538461538e-06	TRINITY_DN72905_c0_g4,TRINITY_DN73679_c1_g2,TRINITY_DN74512_c3_g1,TRINITY_DN75496_c1_g1,TRINITY_DN77234_c1_g2,TRINITY_DN77433_c0_g1,TRINITY_DN77469_c0_g1,TRINITY_DN79570_c1_g1,TRINITY_DN79731_c0_g1,TRINITY_DN80494_c0_g1,TRINITY_DN80532_c2_g2,TRINITY_DN81644_c0_g1,TRINITY_DN82769_c1_g2,TRINITY_DN84678_c0_g1,TRINITY_DN89157_c0_g1,TRINITY_DN90122_c0_g1,TRINITY_DN90376_c0_g3,TRINITY_DN91033_c2_g2,TRI…	TRINITY_DN72905_c0_g4,TRINITY_DN73679_c1_g2,TRINITY_DN74512_c3_g1,TRINITY_DN75496_c1_g1,TRINITY_DN77234_c1_g2,TRINITY_DN77433_c0_g1,TRINITY_DN77469_c0_g1,TRINITY_DN79570_c1_g1,TRINITY_DN79731_c0_g1,TRINITY_DN80494_c0_g1,TRINITY_DN80532_c2_g2,TRINITY_DN81644_c0_g1,TRINITY_DN82769_c1_g2,TRINITY_DN84678_c0_g1,TRINITY_DN89157_c0_g1,TRINITY_DN90122_c0_g1,TRINITY_DN90376_c0_g3,TRINITY_DN91033_c2_g2,TRI…
GO:0043207	response to external biotic stimulus	biological process	50/609	3149/93642	1.1e-08	6.53447826086957e-06	TRINITY_DN68475_c0_g1,TRINITY_DN68475_c0_g3,TRINITY_DN70599_c1_g3,TRINITY_DN71424_c1_g2,TRINITY_DN71558_c1_g1,TRINITY_DN71889_c1_g1,TRINITY_DN72303_c0_g1,TRINITY_DN72866_c0_g3,TRINITY_DN73324_c3_g1,TRINITY_DN73444_c1_g3,TRINITY_DN74096_c1_g1,TRINITY_DN74503_c1_g2,TRINITY_DN75228_c3_g1,TRINITY_DN75340_c0_g3,TRINITY_DN78453_c0_g1,TRINITY_DN79594_c1_g2,TRINITY_DN81259_c0_g1,TRINITY_DN82801_c0_g1,TRI…	TRINITY_DN68475_c0_g1,TRINITY_DN68475_c0_g3,TRINITY_DN70599_c1_g3,TRINITY_DN71424_c1_g2,TRINITY_DN71558_c1_g1,TRINITY_DN71889_c1_g1,TRINITY_DN72303_c0_g1,TRINITY_DN72866_c0_g3,TRINITY_DN73324_c3_g1,TRINITY_DN73444_c1_g3,TRINITY_DN74096_c1_g1,TRINITY_DN74503_c1_g2,TRINITY_DN75228_c3_g1,TRINITY_DN75340_c0_g3,TRINITY_DN78453_c0_g1,TRINITY_DN79594_c1_g2,TRINITY_DN81259_c0_g1,TRINITY_DN82801_c0_g1,TRI…
GO:0051707	response to other organism	biological process	50/609	3149/93642	1.1e-08	6.53447826086957e-06	TRINITY_DN68475_c0_g1,TRINITY_DN68475_c0_g3,TRINITY_DN70599_c1_g3,TRINITY_DN71424_c1_g2,TRINITY_DN71558_c1_g1,TRINITY_DN71889_c1_g1,TRINITY_DN72303_c0_g1,TRINITY_DN72866_c0_g3,TRINITY_DN73324_c3_g1,TRINITY_DN73444_c1_g3,TRINITY_DN74096_c1_g1,TRINITY_DN74503_c1_g2,TRINITY_DN75228_c3_g1,TRINITY_DN75340_c0_g3,TRINITY_DN78453_c0_g1,TRINITY_DN79594_c1_g2,TRINITY_DN81259_c0_g1,TRINITY_DN82801_c0_g1,TRI…	TRINITY_DN68475_c0_g1,TRINITY_DN68475_c0_g3,TRINITY_DN70599_c1_g3,TRINITY_DN71424_c1_g2,TRINITY_DN71558_c1_g1,TRINITY_DN71889_c1_g1,TRINITY_DN72303_c0_g1,TRINITY_DN72866_c0_g3,TRINITY_DN73324_c3_g1,TRINITY_DN73444_c1_g3,TRINITY_DN74096_c1_g1,TRINITY_DN74503_c1_g2,TRINITY_DN75228_c3_g1,TRINITY_DN75340_c0_g3,TRINITY_DN78453_c0_g1,TRINITY_DN79594_c1_g2,TRINITY_DN81259_c0_g1,TRINITY_DN82801_c0_g1,TRI…
GO:0009755	hormone-mediated signaling pathway	biological process	39/609	2135/93642	1.3e-08	7.40079166666667e-06	TRINITY_DN68434_c0_g1,TRINITY_DN68532_c1_g1,TRINITY_DN69399_c0_g2,TRINITY_DN70026_c1_g2,TRINITY_DN72989_c0_g1,TRINITY_DN73324_c3_g1,TRINITY_DN74096_c1_g1,TRINITY_DN74568_c0_g3,TRINITY_DN74996_c0_g1,TRINITY_DN75411_c0_g3,TRINITY_DN76045_c0_g1,TRINITY_DN77469_c0_g4,TRINITY_DN77929_c0_g2,TRINITY_DN81128_c1_g1,TRINITY_DN81128_c3_g1,TRINITY_DN84708_c1_g1,TRINITY_DN85282_c1_g2,TRINITY_DN85980_c1_g1,TRI…	TRINITY_DN68434_c0_g1,TRINITY_DN68532_c1_g1,TRINITY_DN69399_c0_g2,TRINITY_DN70026_c1_g2,TRINITY_DN72989_c0_g1,TRINITY_DN73324_c3_g1,TRINITY_DN74096_c1_g1,TRINITY_DN74568_c0_g3,TRINITY_DN74996_c0_g1,TRINITY_DN75411_c0_g3,TRINITY_DN76045_c0_g1,TRINITY_DN77469_c0_g4,TRINITY_DN77929_c0_g2,TRINITY_DN81128_c1_g1,TRINITY_DN81128_c3_g1,TRINITY_DN84708_c1_g1,TRINITY_DN85282_c1_g2,TRINITY_DN85980_c1_g1,TRI…
GO:0071310	cellular response to organic substance	biological process	58/609	3987/93642	1.5e-08	8.1978e-06	TRINITY_DN68434_c0_g1,TRINITY_DN68532_c1_g1,TRINITY_DN69399_c0_g2,TRINITY_DN70026_c1_g2,TRINITY_DN70723_c1_g1,TRINITY_DN71306_c1_g4,TRINITY_DN71889_c1_g1,TRINITY_DN72819_c0_g1,TRINITY_DN72989_c0_g1,TRINITY_DN73324_c3_g1,TRINITY_DN74096_c1_g1,TRINITY_DN74503_c1_g2,TRINITY_DN74568_c0_g3,TRINITY_DN74996_c0_g1,TRINITY_DN75228_c3_g1,TRINITY_DN75340_c0_g3,TRINITY_DN75411_c0_g3,TRINITY_DN76045_c0_g1,TRI…	TRINITY_DN68434_c0_g1,TRINITY_DN68532_c1_g1,TRINITY_DN69399_c0_g2,TRINITY_DN70026_c1_g2,TRINITY_DN70723_c1_g1,TRINITY_DN71306_c1_g4,TRINITY_DN71889_c1_g1,TRINITY_DN72819_c0_g1,TRINITY_DN72989_c0_g1,TRINITY_DN73324_c3_g1,TRINITY_DN74096_c1_g1,TRINITY_DN74503_c1_g2,TRINITY_DN74568_c0_g3,TRINITY_DN74996_c0_g1,TRINITY_DN75228_c3_g1,TRINITY_DN75340_c0_g3,TRINITY_DN75411_c0_g3,TRINITY_DN76045_c0_g1,TRI…
GO:0071495	cellular response to endogenous stimulus	biological process	46/609	2817/93642	1.8e-08	9.459e-06	TRINITY_DN68434_c0_g1,TRINITY_DN68532_c1_g1,TRINITY_DN69399_c0_g2,TRINITY_DN70026_c1_g2,TRINITY_DN71306_c1_g4,TRINITY_DN72989_c0_g1,TRINITY_DN73324_c3_g1,TRINITY_DN74096_c1_g1,TRINITY_DN74568_c0_g3,TRINITY_DN74996_c0_g1,TRINITY_DN75228_c3_g1,TRINITY_DN75411_c0_g3,TRINITY_DN76045_c0_g1,TRINITY_DN77469_c0_g4,TRINITY_DN77929_c0_g2,TRINITY_DN81128_c1_g1,TRINITY_DN81128_c3_g1,TRINITY_DN84335_c0_g1,TRI…	TRINITY_DN68434_c0_g1,TRINITY_DN68532_c1_g1,TRINITY_DN69399_c0_g2,TRINITY_DN70026_c1_g2,TRINITY_DN71306_c1_g4,TRINITY_DN72989_c0_g1,TRINITY_DN73324_c3_g1,TRINITY_DN74096_c1_g1,TRINITY_DN74568_c0_g3,TRINITY_DN74996_c0_g1,TRINITY_DN75228_c3_g1,TRINITY_DN75411_c0_g3,TRINITY_DN76045_c0_g1,TRINITY_DN77469_c0_g4,TRINITY_DN77929_c0_g2,TRINITY_DN81128_c1_g1,TRINITY_DN81128_c3_g1,TRINITY_DN84335_c0_g1,TRI…
GO:0009725	response to hormone	biological process	58/609	4015/93642	1.9e-08	9.6147037037037e-06	TRINITY_DN68434_c0_g1,TRINITY_DN68532_c1_g1,TRINITY_DN69399_c0_g2,TRINITY_DN70026_c1_g2,TRINITY_DN71554_c0_g1,TRINITY_DN71958_c2_g1,TRINITY_DN72303_c0_g1,TRINITY_DN72989_c0_g1,TRINITY_DN73324_c3_g1,TRINITY_DN74096_c1_g1,TRINITY_DN74568_c0_g3,TRINITY_DN74996_c0_g1,TRINITY_DN75228_c3_g1,TRINITY_DN75411_c0_g3,TRINITY_DN76045_c0_g1,TRINITY_DN77049_c0_g3,TRINITY_DN77469_c0_g4,TRINITY_DN77929_c0_g2,TRI…	TRINITY_DN68434_c0_g1,TRINITY_DN68532_c1_g1,TRINITY_DN69399_c0_g2,TRINITY_DN70026_c1_g2,TRINITY_DN71554_c0_g1,TRINITY_DN71958_c2_g1,TRINITY_DN72303_c0_g1,TRINITY_DN72989_c0_g1,TRINITY_DN73324_c3_g1,TRINITY_DN74096_c1_g1,TRINITY_DN74568_c0_g3,TRINITY_DN74996_c0_g1,TRINITY_DN75228_c3_g1,TRINITY_DN75411_c0_g3,TRINITY_DN76045_c0_g1,TRINITY_DN77049_c0_g3,TRINITY_DN77469_c0_g4,TRINITY_DN77929_c0_g2,TRI…
GO:0009941	chloroplast envelope	cellular component	30/648	1446/96716	8.3e-08	1.12405714285714e-05	TRINITY_DN70885_c1_g1,TRINITY_DN74697_c0_g6,TRINITY_DN75228_c3_g1,TRINITY_DN77629_c0_g1,TRINITY_DN79475_c1_g2,TRINITY_DN79655_c1_g1,TRINITY_DN81660_c3_g2,TRINITY_DN85213_c0_g1,TRINITY_DN85750_c2_g1,TRINITY_DN87488_c0_g1,TRINITY_DN87488_c0_g6,TRINITY_DN87843_c0_g2,TRINITY_DN87881_c0_g2,TRINITY_DN88914_c0_g1,TRINITY_DN89410_c0_g2,TRINITY_DN89634_c0_g3,TRINITY_DN90493_c3_g1,TRINITY_DN90634_c0_g3,TRI…	TRINITY_DN70885_c1_g1,TRINITY_DN74697_c0_g6,TRINITY_DN75228_c3_g1,TRINITY_DN77629_c0_g1,TRINITY_DN79475_c1_g2,TRINITY_DN79655_c1_g1,TRINITY_DN81660_c3_g2,TRINITY_DN85213_c0_g1,TRINITY_DN85750_c2_g1,TRINITY_DN87488_c0_g1,TRINITY_DN87488_c0_g6,TRINITY_DN87843_c0_g2,TRINITY_DN87881_c0_g2,TRINITY_DN88914_c0_g1,TRINITY_DN89410_c0_g2,TRINITY_DN89634_c0_g3,TRINITY_DN90493_c3_g1,TRINITY_DN90634_c0_g3,TRI…
GO:0080188	RNA-directed DNA methylation	biological process	9/609	101/93642	2.4e-08	1.17111428571429e-05	TRINITY_DN70421_c0_g1,TRINITY_DN72819_c0_g1,TRINITY_DN80794_c0_g1,TRINITY_DN89410_c0_g2,TRINITY_DN95775_c0_g1,TRINITY_DN96368_c1_g3,TRINITY_DN96797_c0_g4,TRINITY_DN97461_c0_g1,TRINITY_DN97461_c0_g2	TRINITY_DN70421_c0_g1,TRINITY_DN72819_c0_g1,TRINITY_DN80794_c0_g1,TRINITY_DN89410_c0_g2,TRINITY_DN95775_c0_g1,TRINITY_DN96368_c1_g3,TRINITY_DN96797_c0_g4,TRINITY_DN97461_c0_g1,TRINITY_DN97461_c0_g2
GO:0065007	biological regulation	biological process	246/609	28076/93642	2.7e-08	1.2720724137931e-05	TRINITY_DN66987_c0_g1,TRINITY_DN68255_c0_g1,TRINITY_DN68434_c0_g1,TRINITY_DN68532_c1_g1,TRINITY_DN69399_c0_g2,TRINITY_DN69726_c2_g1,TRINITY_DN70026_c1_g2,TRINITY_DN70421_c0_g1,TRINITY_DN70487_c0_g1,TRINITY_DN70723_c1_g1,TRINITY_DN70831_c1_g2,TRINITY_DN70911_c2_g1,TRINITY_DN71143_c0_g1,TRINITY_DN71306_c1_g4,TRINITY_DN71424_c1_g2,TRINITY_DN71554_c0_g1,TRINITY_DN71558_c1_g1,TRINITY_DN71855_c4_g2,TRI…	TRINITY_DN66987_c0_g1,TRINITY_DN68255_c0_g1,TRINITY_DN68434_c0_g1,TRINITY_DN68532_c1_g1,TRINITY_DN69399_c0_g2,TRINITY_DN69726_c2_g1,TRINITY_DN70026_c1_g2,TRINITY_DN70421_c0_g1,TRINITY_DN70487_c0_g1,TRINITY_DN70723_c1_g1,TRINITY_DN70831_c1_g2,TRINITY_DN70911_c2_g1,TRINITY_DN71143_c0_g1,TRINITY_DN71306_c1_g4,TRINITY_DN71424_c1_g2,TRINITY_DN71554_c0_g1,TRINITY_DN71558_c1_g1,TRINITY_DN71855_c4_g2,TRI…
GO:0009734	auxin-activated signaling pathway	biological process	20/609	670/93642	2.8e-08	1.27521333333333e-05	TRINITY_DN69399_c0_g2,TRINITY_DN70026_c1_g2,TRINITY_DN74096_c1_g1,TRINITY_DN74996_c0_g1,TRINITY_DN75411_c0_g3,TRINITY_DN76045_c0_g1,TRINITY_DN77469_c0_g4,TRINITY_DN77929_c0_g2,TRINITY_DN81128_c1_g1,TRINITY_DN81128_c3_g1,TRINITY_DN87600_c1_g3,TRINITY_DN90620_c1_g1,TRINITY_DN91840_c1_g1,TRINITY_DN94649_c0_g3,TRINITY_DN95710_c3_g2,TRINITY_DN96930_c0_g1,TRINITY_DN97304_c1_g2,TRINITY_DN97471_c1_g1,TRI…	TRINITY_DN69399_c0_g2,TRINITY_DN70026_c1_g2,TRINITY_DN74096_c1_g1,TRINITY_DN74996_c0_g1,TRINITY_DN75411_c0_g3,TRINITY_DN76045_c0_g1,TRINITY_DN77469_c0_g4,TRINITY_DN77929_c0_g2,TRINITY_DN81128_c1_g1,TRINITY_DN81128_c3_g1,TRINITY_DN87600_c1_g3,TRINITY_DN90620_c1_g1,TRINITY_DN91840_c1_g1,TRINITY_DN94649_c0_g3,TRINITY_DN95710_c3_g2,TRINITY_DN96930_c0_g1,TRINITY_DN97304_c1_g2,TRINITY_DN97471_c1_g1,TRI…
GO:0032870	cellular response to hormone stimulus	biological process	42/609	2499/93642	3.6e-08	1.5370875e-05	TRINITY_DN68434_c0_g1,TRINITY_DN68532_c1_g1,TRINITY_DN69399_c0_g2,TRINITY_DN70026_c1_g2,TRINITY_DN72989_c0_g1,TRINITY_DN73324_c3_g1,TRINITY_DN74096_c1_g1,TRINITY_DN74568_c0_g3,TRINITY_DN74996_c0_g1,TRINITY_DN75228_c3_g1,TRINITY_DN75411_c0_g3,TRINITY_DN76045_c0_g1,TRINITY_DN77469_c0_g4,TRINITY_DN77929_c0_g2,TRINITY_DN81128_c1_g1,TRINITY_DN81128_c3_g1,TRINITY_DN84708_c1_g1,TRINITY_DN85282_c1_g2,TRI…	TRINITY_DN68434_c0_g1,TRINITY_DN68532_c1_g1,TRINITY_DN69399_c0_g2,TRINITY_DN70026_c1_g2,TRINITY_DN72989_c0_g1,TRINITY_DN73324_c3_g1,TRINITY_DN74096_c1_g1,TRINITY_DN74568_c0_g3,TRINITY_DN74996_c0_g1,TRINITY_DN75228_c3_g1,TRINITY_DN75411_c0_g3,TRINITY_DN76045_c0_g1,TRINITY_DN77469_c0_g4,TRINITY_DN77929_c0_g2,TRINITY_DN81128_c1_g1,TRINITY_DN81128_c3_g1,TRINITY_DN84708_c1_g1,TRINITY_DN85282_c1_g2,TRI…
GO:0000003	reproduction	biological process	82/609	6722/93642	3.6e-08	1.5370875e-05	TRINITY_DN68079_c0_g2,TRINITY_DN68255_c0_g1,TRINITY_DN70026_c1_g2,TRINITY_DN70725_c1_g7,TRINITY_DN70911_c2_g1,TRINITY_DN71554_c0_g1,TRINITY_DN73374_c1_g2,TRINITY_DN73679_c0_g1,TRINITY_DN74096_c1_g1,TRINITY_DN74691_c0_g3,TRINITY_DN75121_c0_g4,TRINITY_DN75340_c0_g2,TRINITY_DN75340_c0_g3,TRINITY_DN77099_c0_g1,TRINITY_DN77469_c0_g4,TRINITY_DN78559_c1_g4,TRINITY_DN79849_c1_g1,TRINITY_DN80004_c0_g1,TRI…	TRINITY_DN68079_c0_g2,TRINITY_DN68255_c0_g1,TRINITY_DN70026_c1_g2,TRINITY_DN70725_c1_g7,TRINITY_DN70911_c2_g1,TRINITY_DN71554_c0_g1,TRINITY_DN73374_c1_g2,TRINITY_DN73679_c0_g1,TRINITY_DN74096_c1_g1,TRINITY_DN74691_c0_g3,TRINITY_DN75121_c0_g4,TRINITY_DN75340_c0_g2,TRINITY_DN75340_c0_g3,TRINITY_DN77099_c0_g1,TRINITY_DN77469_c0_g4,TRINITY_DN78559_c1_g4,TRINITY_DN79849_c1_g1,TRINITY_DN80004_c0_g1,TRI…
GO:0051252	regulation of RNA metabolic process	biological process	94/609	8196/93642	5.8e-08	2.40137575757576e-05	TRINITY_DN66987_c0_g1,TRINITY_DN68255_c0_g1,TRINITY_DN70026_c1_g2,TRINITY_DN70487_c0_g1,TRINITY_DN70831_c1_g2,TRINITY_DN71424_c1_g2,TRINITY_DN71554_c0_g1,TRINITY_DN71855_c4_g2,TRINITY_DN72819_c0_g1,TRINITY_DN74568_c0_g3,TRINITY_DN76045_c0_g1,TRINITY_DN77126_c1_g2,TRINITY_DN77126_c1_g3,TRINITY_DN78801_c1_g1,TRINITY_DN80370_c4_g5,TRINITY_DN80415_c0_g1,TRINITY_DN81128_c1_g1,TRINITY_DN81128_c3_g1,TRI…	TRINITY_DN66987_c0_g1,TRINITY_DN68255_c0_g1,TRINITY_DN70026_c1_g2,TRINITY_DN70487_c0_g1,TRINITY_DN70831_c1_g2,TRINITY_DN71424_c1_g2,TRINITY_DN71554_c0_g1,TRINITY_DN71855_c4_g2,TRINITY_DN72819_c0_g1,TRINITY_DN74568_c0_g3,TRINITY_DN76045_c0_g1,TRINITY_DN77126_c1_g2,TRINITY_DN77126_c1_g3,TRINITY_DN78801_c1_g1,TRINITY_DN80370_c4_g5,TRINITY_DN80415_c0_g1,TRINITY_DN81128_c1_g1,TRINITY_DN81128_c3_g1,TRI…
GO:0009526	plastid envelope	cellular component	30/648	1504/96716	1.9e-07	2.4016e-05	TRINITY_DN70885_c1_g1,TRINITY_DN74697_c0_g6,TRINITY_DN75228_c3_g1,TRINITY_DN77629_c0_g1,TRINITY_DN79475_c1_g2,TRINITY_DN79655_c1_g1,TRINITY_DN81660_c3_g2,TRINITY_DN85213_c0_g1,TRINITY_DN85750_c2_g1,TRINITY_DN87488_c0_g1,TRINITY_DN87488_c0_g6,TRINITY_DN87843_c0_g2,TRINITY_DN87881_c0_g2,TRINITY_DN88914_c0_g1,TRINITY_DN89410_c0_g2,TRINITY_DN89634_c0_g3,TRINITY_DN90493_c3_g1,TRINITY_DN90634_c0_g3,TRI…	TRINITY_DN70885_c1_g1,TRINITY_DN74697_c0_g6,TRINITY_DN75228_c3_g1,TRINITY_DN77629_c0_g1,TRINITY_DN79475_c1_g2,TRINITY_DN79655_c1_g1,TRINITY_DN81660_c3_g2,TRINITY_DN85213_c0_g1,TRINITY_DN85750_c2_g1,TRINITY_DN87488_c0_g1,TRINITY_DN87488_c0_g6,TRINITY_DN87843_c0_g2,TRINITY_DN87881_c0_g2,TRINITY_DN88914_c0_g1,TRINITY_DN89410_c0_g2,TRINITY_DN89634_c0_g3,TRINITY_DN90493_c3_g1,TRINITY_DN90634_c0_g3,TRI…
GO:0071365	cellular response to auxin stimulus	biological process	20/609	706/93642	6.5e-08	2.58078888888889e-05	TRINITY_DN69399_c0_g2,TRINITY_DN70026_c1_g2,TRINITY_DN74096_c1_g1,TRINITY_DN74996_c0_g1,TRINITY_DN75411_c0_g3,TRINITY_DN76045_c0_g1,TRINITY_DN77469_c0_g4,TRINITY_DN77929_c0_g2,TRINITY_DN81128_c1_g1,TRINITY_DN81128_c3_g1,TRINITY_DN87600_c1_g3,TRINITY_DN90620_c1_g1,TRINITY_DN91840_c1_g1,TRINITY_DN94649_c0_g3,TRINITY_DN95710_c3_g2,TRINITY_DN96930_c0_g1,TRINITY_DN97304_c1_g2,TRINITY_DN97471_c1_g1,TRI…	TRINITY_DN69399_c0_g2,TRINITY_DN70026_c1_g2,TRINITY_DN74096_c1_g1,TRINITY_DN74996_c0_g1,TRINITY_DN75411_c0_g3,TRINITY_DN76045_c0_g1,TRINITY_DN77469_c0_g4,TRINITY_DN77929_c0_g2,TRINITY_DN81128_c1_g1,TRINITY_DN81128_c3_g1,TRINITY_DN87600_c1_g3,TRINITY_DN90620_c1_g1,TRINITY_DN91840_c1_g1,TRINITY_DN94649_c0_g3,TRINITY_DN95710_c3_g2,TRINITY_DN96930_c0_g1,TRINITY_DN97304_c1_g2,TRINITY_DN97471_c1_g1,TRI…
GO:0006355	regulation of transcription, DNA-templated	biological process	91/609	7867/93642	6.7e-08	2.58078888888889e-05	TRINITY_DN66987_c0_g1,TRINITY_DN68255_c0_g1,TRINITY_DN70026_c1_g2,TRINITY_DN70487_c0_g1,TRINITY_DN70831_c1_g2,TRINITY_DN71424_c1_g2,TRINITY_DN71554_c0_g1,TRINITY_DN71855_c4_g2,TRINITY_DN72819_c0_g1,TRINITY_DN74568_c0_g3,TRINITY_DN76045_c0_g1,TRINITY_DN77126_c1_g2,TRINITY_DN77126_c1_g3,TRINITY_DN78801_c1_g1,TRINITY_DN80370_c4_g5,TRINITY_DN80415_c0_g1,TRINITY_DN81128_c1_g1,TRINITY_DN81128_c3_g1,TRI…	TRINITY_DN66987_c0_g1,TRINITY_DN68255_c0_g1,TRINITY_DN70026_c1_g2,TRINITY_DN70487_c0_g1,TRINITY_DN70831_c1_g2,TRINITY_DN71424_c1_g2,TRINITY_DN71554_c0_g1,TRINITY_DN71855_c4_g2,TRINITY_DN72819_c0_g1,TRINITY_DN74568_c0_g3,TRINITY_DN76045_c0_g1,TRINITY_DN77126_c1_g2,TRINITY_DN77126_c1_g3,TRINITY_DN78801_c1_g1,TRINITY_DN80370_c4_g5,TRINITY_DN80415_c0_g1,TRINITY_DN81128_c1_g1,TRINITY_DN81128_c3_g1,TRI…
GO:1903506	regulation of nucleic acid-templated transcription	biological process	91/609	7870/93642	6.8e-08	2.58078888888889e-05	TRINITY_DN66987_c0_g1,TRINITY_DN68255_c0_g1,TRINITY_DN70026_c1_g2,TRINITY_DN70487_c0_g1,TRINITY_DN70831_c1_g2,TRINITY_DN71424_c1_g2,TRINITY_DN71554_c0_g1,TRINITY_DN71855_c4_g2,TRINITY_DN72819_c0_g1,TRINITY_DN74568_c0_g3,TRINITY_DN76045_c0_g1,TRINITY_DN77126_c1_g2,TRINITY_DN77126_c1_g3,TRINITY_DN78801_c1_g1,TRINITY_DN80370_c4_g5,TRINITY_DN80415_c0_g1,TRINITY_DN81128_c1_g1,TRINITY_DN81128_c3_g1,TRI…	TRINITY_DN66987_c0_g1,TRINITY_DN68255_c0_g1,TRINITY_DN70026_c1_g2,TRINITY_DN70487_c0_g1,TRINITY_DN70831_c1_g2,TRINITY_DN71424_c1_g2,TRINITY_DN71554_c0_g1,TRINITY_DN71855_c4_g2,TRINITY_DN72819_c0_g1,TRINITY_DN74568_c0_g3,TRINITY_DN76045_c0_g1,TRINITY_DN77126_c1_g2,TRINITY_DN77126_c1_g3,TRINITY_DN78801_c1_g1,TRINITY_DN80370_c4_g5,TRINITY_DN80415_c0_g1,TRINITY_DN81128_c1_g1,TRINITY_DN81128_c3_g1,TRI…
GO:0009832	plant-type cell wall biogenesis	biological process	14/609	340/93642	7.3e-08	2.66068947368421e-05	TRINITY_DN64594_c0_g1,TRINITY_DN68532_c1_g1,TRINITY_DN80415_c0_g1,TRINITY_DN80965_c0_g4,TRINITY_DN82458_c1_g1,TRINITY_DN82528_c0_g1,TRINITY_DN88959_c0_g1,TRINITY_DN89487_c0_g3,TRINITY_DN91323_c1_g5,TRINITY_DN91736_c1_g1,TRINITY_DN92410_c0_g3,TRINITY_DN96892_c2_g1,TRINITY_DN98258_c0_g1,TRINITY_DN99026_c3_g1	TRINITY_DN64594_c0_g1,TRINITY_DN68532_c1_g1,TRINITY_DN80415_c0_g1,TRINITY_DN80965_c0_g4,TRINITY_DN82458_c1_g1,TRINITY_DN82528_c0_g1,TRINITY_DN88959_c0_g1,TRINITY_DN89487_c0_g3,TRINITY_DN91323_c1_g5,TRINITY_DN91736_c1_g1,TRINITY_DN92410_c0_g3,TRINITY_DN96892_c2_g1,TRINITY_DN98258_c0_g1,TRINITY_DN99026_c3_g1
GO:2001141	regulation of RNA biosynthetic process	biological process	91/609	7883/93642	7.4e-08	2.66068947368421e-05	TRINITY_DN66987_c0_g1,TRINITY_DN68255_c0_g1,TRINITY_DN70026_c1_g2,TRINITY_DN70487_c0_g1,TRINITY_DN70831_c1_g2,TRINITY_DN71424_c1_g2,TRINITY_DN71554_c0_g1,TRINITY_DN71855_c4_g2,TRINITY_DN72819_c0_g1,TRINITY_DN74568_c0_g3,TRINITY_DN76045_c0_g1,TRINITY_DN77126_c1_g2,TRINITY_DN77126_c1_g3,TRINITY_DN78801_c1_g1,TRINITY_DN80370_c4_g5,TRINITY_DN80415_c0_g1,TRINITY_DN81128_c1_g1,TRINITY_DN81128_c3_g1,TRI…	TRINITY_DN66987_c0_g1,TRINITY_DN68255_c0_g1,TRINITY_DN70026_c1_g2,TRINITY_DN70487_c0_g1,TRINITY_DN70831_c1_g2,TRINITY_DN71424_c1_g2,TRINITY_DN71554_c0_g1,TRINITY_DN71855_c4_g2,TRINITY_DN72819_c0_g1,TRINITY_DN74568_c0_g3,TRINITY_DN76045_c0_g1,TRINITY_DN77126_c1_g2,TRINITY_DN77126_c1_g3,TRINITY_DN78801_c1_g1,TRINITY_DN80370_c4_g5,TRINITY_DN80415_c0_g1,TRINITY_DN81128_c1_g1,TRINITY_DN81128_c3_g1,TRI…
GO:0009607	response to biotic stimulus	biological process	50/609	3360/93642	7.8e-08	2.7326e-05	TRINITY_DN68475_c0_g1,TRINITY_DN68475_c0_g3,TRINITY_DN70599_c1_g3,TRINITY_DN71424_c1_g2,TRINITY_DN71558_c1_g1,TRINITY_DN71889_c1_g1,TRINITY_DN72303_c0_g1,TRINITY_DN72866_c0_g3,TRINITY_DN73324_c3_g1,TRINITY_DN73444_c1_g3,TRINITY_DN74096_c1_g1,TRINITY_DN74503_c1_g2,TRINITY_DN75228_c3_g1,TRINITY_DN75340_c0_g3,TRINITY_DN78453_c0_g1,TRINITY_DN79594_c1_g2,TRINITY_DN81259_c0_g1,TRINITY_DN82801_c0_g1,TRI…	TRINITY_DN68475_c0_g1,TRINITY_DN68475_c0_g3,TRINITY_DN70599_c1_g3,TRINITY_DN71424_c1_g2,TRINITY_DN71558_c1_g1,TRINITY_DN71889_c1_g1,TRINITY_DN72303_c0_g1,TRINITY_DN72866_c0_g3,TRINITY_DN73324_c3_g1,TRINITY_DN73444_c1_g3,TRINITY_DN74096_c1_g1,TRINITY_DN74503_c1_g2,TRINITY_DN75228_c3_g1,TRINITY_DN75340_c0_g3,TRINITY_DN78453_c0_g1,TRINITY_DN79594_c1_g2,TRINITY_DN81259_c0_g1,TRINITY_DN82801_c0_g1,TRI…
GO:0042221	response to chemical	biological process	120/609	11487/93642	1.1e-07	3.757325e-05	TRINITY_DN63286_c0_g1,TRINITY_DN67158_c0_g1,TRINITY_DN68434_c0_g1,TRINITY_DN68475_c0_g1,TRINITY_DN68475_c0_g3,TRINITY_DN68532_c1_g1,TRINITY_DN69399_c0_g2,TRINITY_DN70026_c1_g2,TRINITY_DN70599_c1_g3,TRINITY_DN70723_c1_g1,TRINITY_DN70911_c2_g1,TRINITY_DN71042_c0_g1,TRINITY_DN71306_c1_g4,TRINITY_DN71554_c0_g1,TRINITY_DN71889_c1_g1,TRINITY_DN71958_c2_g1,TRINITY_DN72281_c0_g1,TRINITY_DN72303_c0_g1,TRI…	TRINITY_DN63286_c0_g1,TRINITY_DN67158_c0_g1,TRINITY_DN68434_c0_g1,TRINITY_DN68475_c0_g1,TRINITY_DN68475_c0_g3,TRINITY_DN68532_c1_g1,TRINITY_DN69399_c0_g2,TRINITY_DN70026_c1_g2,TRINITY_DN70599_c1_g3,TRINITY_DN70723_c1_g1,TRINITY_DN70911_c2_g1,TRINITY_DN71042_c0_g1,TRINITY_DN71306_c1_g4,TRINITY_DN71554_c0_g1,TRINITY_DN71889_c1_g1,TRINITY_DN71958_c2_g1,TRINITY_DN72281_c0_g1,TRINITY_DN72303_c0_g1,TRI…
GO:0009888	tissue development	biological process	36/609	2053/93642	1.3e-07	4.22902380952381e-05	TRINITY_DN70156_c0_g5,TRINITY_DN70723_c1_g1,TRINITY_DN71143_c0_g1,TRINITY_DN71424_c1_g2,TRINITY_DN73145_c2_g1,TRINITY_DN73679_c0_g1,TRINITY_DN74691_c0_g3,TRINITY_DN77099_c0_g1,TRINITY_DN78801_c1_g1,TRINITY_DN80004_c0_g1,TRINITY_DN80373_c0_g1,TRINITY_DN80884_c0_g1,TRINITY_DN81232_c0_g1,TRINITY_DN86210_c0_g1,TRINITY_DN88959_c0_g1,TRINITY_DN89685_c1_g2,TRINITY_DN90620_c1_g1,TRINITY_DN90685_c2_g1,TRI…	TRINITY_DN70156_c0_g5,TRINITY_DN70723_c1_g1,TRINITY_DN71143_c0_g1,TRINITY_DN71424_c1_g2,TRINITY_DN73145_c2_g1,TRINITY_DN73679_c0_g1,TRINITY_DN74691_c0_g3,TRINITY_DN77099_c0_g1,TRINITY_DN78801_c1_g1,TRINITY_DN80004_c0_g1,TRINITY_DN80373_c0_g1,TRINITY_DN80884_c0_g1,TRINITY_DN81232_c0_g1,TRINITY_DN86210_c0_g1,TRINITY_DN88959_c0_g1,TRINITY_DN89685_c1_g2,TRINITY_DN90620_c1_g1,TRINITY_DN90685_c2_g1,TRI…
GO:0009733	response to auxin	biological process	24/609	1035/93642	1.3e-07	4.22902380952381e-05	TRINITY_DN69399_c0_g2,TRINITY_DN70026_c1_g2,TRINITY_DN71554_c0_g1,TRINITY_DN74096_c1_g1,TRINITY_DN74996_c0_g1,TRINITY_DN75411_c0_g3,TRINITY_DN76045_c0_g1,TRINITY_DN77469_c0_g4,TRINITY_DN77929_c0_g2,TRINITY_DN81128_c1_g1,TRINITY_DN81128_c3_g1,TRINITY_DN87600_c1_g3,TRINITY_DN90620_c1_g1,TRINITY_DN91840_c1_g1,TRINITY_DN92708_c1_g2,TRINITY_DN94649_c0_g3,TRINITY_DN95125_c2_g1,TRINITY_DN95710_c3_g2,TRI…	TRINITY_DN69399_c0_g2,TRINITY_DN70026_c1_g2,TRINITY_DN71554_c0_g1,TRINITY_DN74096_c1_g1,TRINITY_DN74996_c0_g1,TRINITY_DN75411_c0_g3,TRINITY_DN76045_c0_g1,TRINITY_DN77469_c0_g4,TRINITY_DN77929_c0_g2,TRINITY_DN81128_c1_g1,TRINITY_DN81128_c3_g1,TRINITY_DN87600_c1_g3,TRINITY_DN90620_c1_g1,TRINITY_DN91840_c1_g1,TRINITY_DN92708_c1_g2,TRINITY_DN94649_c0_g3,TRINITY_DN95125_c2_g1,TRINITY_DN95710_c3_g2,TRI…
GO:0019222	regulation of metabolic process	biological process	132/609	13096/93642	1.6e-07	5.08390697674419e-05	TRINITY_DN66987_c0_g1,TRINITY_DN68255_c0_g1,TRINITY_DN70026_c1_g2,TRINITY_DN70421_c0_g1,TRINITY_DN70487_c0_g1,TRINITY_DN70723_c1_g1,TRINITY_DN70831_c1_g2,TRINITY_DN71424_c1_g2,TRINITY_DN71554_c0_g1,TRINITY_DN71855_c4_g2,TRINITY_DN71889_c1_g1,TRINITY_DN72303_c0_g1,TRINITY_DN72819_c0_g1,TRINITY_DN73324_c3_g1,TRINITY_DN73444_c1_g3,TRINITY_DN73493_c1_g1,TRINITY_DN74503_c1_g2,TRINITY_DN74568_c0_g3,TRI…	TRINITY_DN66987_c0_g1,TRINITY_DN68255_c0_g1,TRINITY_DN70026_c1_g2,TRINITY_DN70421_c0_g1,TRINITY_DN70487_c0_g1,TRINITY_DN70723_c1_g1,TRINITY_DN70831_c1_g2,TRINITY_DN71424_c1_g2,TRINITY_DN71554_c0_g1,TRINITY_DN71855_c4_g2,TRINITY_DN71889_c1_g1,TRINITY_DN72303_c0_g1,TRINITY_DN72819_c0_g1,TRINITY_DN73324_c3_g1,TRINITY_DN73444_c1_g3,TRINITY_DN73493_c1_g1,TRINITY_DN74503_c1_g2,TRINITY_DN74568_c0_g3,TRI…
GO:0006305	DNA alkylation	biological process	12/609	261/93642	1.9e-07	5.76882222222222e-05	TRINITY_DN70421_c0_g1,TRINITY_DN72819_c0_g1,TRINITY_DN80794_c0_g1,TRINITY_DN84336_c1_g2,TRINITY_DN89410_c0_g2,TRINITY_DN91784_c1_g1,TRINITY_DN94594_c0_g1,TRINITY_DN95775_c0_g1,TRINITY_DN96368_c1_g3,TRINITY_DN96797_c0_g4,TRINITY_DN97461_c0_g1,TRINITY_DN97461_c0_g2	TRINITY_DN70421_c0_g1,TRINITY_DN72819_c0_g1,TRINITY_DN80794_c0_g1,TRINITY_DN84336_c1_g2,TRINITY_DN89410_c0_g2,TRINITY_DN91784_c1_g1,TRINITY_DN94594_c0_g1,TRINITY_DN95775_c0_g1,TRINITY_DN96368_c1_g3,TRINITY_DN96797_c0_g4,TRINITY_DN97461_c0_g1,TRINITY_DN97461_c0_g2
GO:0006306	DNA methylation	biological process	12/609	261/93642	1.9e-07	5.76882222222222e-05	TRINITY_DN70421_c0_g1,TRINITY_DN72819_c0_g1,TRINITY_DN80794_c0_g1,TRINITY_DN84336_c1_g2,TRINITY_DN89410_c0_g2,TRINITY_DN91784_c1_g1,TRINITY_DN94594_c0_g1,TRINITY_DN95775_c0_g1,TRINITY_DN96368_c1_g3,TRINITY_DN96797_c0_g4,TRINITY_DN97461_c0_g1,TRINITY_DN97461_c0_g2	TRINITY_DN70421_c0_g1,TRINITY_DN72819_c0_g1,TRINITY_DN80794_c0_g1,TRINITY_DN84336_c1_g2,TRINITY_DN89410_c0_g2,TRINITY_DN91784_c1_g1,TRINITY_DN94594_c0_g1,TRINITY_DN95775_c0_g1,TRINITY_DN96368_c1_g3,TRINITY_DN96797_c0_g4,TRINITY_DN97461_c0_g1,TRINITY_DN97461_c0_g2
GO:0009414	response to water deprivation	biological process	20/609	762/93642	2.2e-07	6.26220833333333e-05	TRINITY_DN73130_c0_g1,TRINITY_DN77049_c0_g3,TRINITY_DN81058_c1_g3,TRINITY_DN82502_c0_g1,TRINITY_DN82502_c0_g3,TRINITY_DN85946_c2_g2,TRINITY_DN86210_c0_g1,TRINITY_DN87533_c3_g4,TRINITY_DN87713_c1_g2,TRINITY_DN89102_c1_g1,TRINITY_DN91464_c3_g1,TRINITY_DN91644_c0_g1,TRINITY_DN92690_c1_g1,TRINITY_DN93209_c1_g1,TRINITY_DN93904_c1_g2,TRINITY_DN93943_c0_g3,TRINITY_DN96028_c0_g1,TRINITY_DN96354_c1_g1,TRI…	TRINITY_DN73130_c0_g1,TRINITY_DN77049_c0_g3,TRINITY_DN81058_c1_g3,TRINITY_DN82502_c0_g1,TRINITY_DN82502_c0_g3,TRINITY_DN85946_c2_g2,TRINITY_DN86210_c0_g1,TRINITY_DN87533_c3_g4,TRINITY_DN87713_c1_g2,TRINITY_DN89102_c1_g1,TRINITY_DN91464_c3_g1,TRINITY_DN91644_c0_g1,TRINITY_DN92690_c1_g1,TRINITY_DN93209_c1_g1,TRINITY_DN93904_c1_g2,TRINITY_DN93943_c0_g3,TRINITY_DN96028_c0_g1,TRINITY_DN96354_c1_g1,TRI…
GO:0006351	transcription, DNA-templated	biological process	108/609	10146/93642	2.2e-07	6.26220833333333e-05	TRINITY_DN66987_c0_g1,TRINITY_DN68255_c0_g1,TRINITY_DN68532_c1_g1,TRINITY_DN70026_c1_g2,TRINITY_DN70156_c0_g5,TRINITY_DN70487_c0_g1,TRINITY_DN70831_c1_g2,TRINITY_DN71424_c1_g2,TRINITY_DN71554_c0_g1,TRINITY_DN71558_c1_g1,TRINITY_DN71855_c4_g2,TRINITY_DN72819_c0_g1,TRINITY_DN74568_c0_g3,TRINITY_DN76045_c0_g1,TRINITY_DN76917_c3_g1,TRINITY_DN77126_c1_g2,TRINITY_DN77126_c1_g3,TRINITY_DN78801_c1_g1,TRI…	TRINITY_DN66987_c0_g1,TRINITY_DN68255_c0_g1,TRINITY_DN68532_c1_g1,TRINITY_DN70026_c1_g2,TRINITY_DN70156_c0_g5,TRINITY_DN70487_c0_g1,TRINITY_DN70831_c1_g2,TRINITY_DN71424_c1_g2,TRINITY_DN71554_c0_g1,TRINITY_DN71558_c1_g1,TRINITY_DN71855_c4_g2,TRINITY_DN72819_c0_g1,TRINITY_DN74568_c0_g3,TRINITY_DN76045_c0_g1,TRINITY_DN76917_c3_g1,TRINITY_DN77126_c1_g2,TRINITY_DN77126_c1_g3,TRINITY_DN78801_c1_g1,TRI…
GO:0097659	nucleic acid-templated transcription	biological process	108/609	10148/93642	2.2e-07	6.26220833333333e-05	TRINITY_DN66987_c0_g1,TRINITY_DN68255_c0_g1,TRINITY_DN68532_c1_g1,TRINITY_DN70026_c1_g2,TRINITY_DN70156_c0_g5,TRINITY_DN70487_c0_g1,TRINITY_DN70831_c1_g2,TRINITY_DN71424_c1_g2,TRINITY_DN71554_c0_g1,TRINITY_DN71558_c1_g1,TRINITY_DN71855_c4_g2,TRINITY_DN72819_c0_g1,TRINITY_DN74568_c0_g3,TRINITY_DN76045_c0_g1,TRINITY_DN76917_c3_g1,TRINITY_DN77126_c1_g2,TRINITY_DN77126_c1_g3,TRINITY_DN78801_c1_g1,TRI…	TRINITY_DN66987_c0_g1,TRINITY_DN68255_c0_g1,TRINITY_DN68532_c1_g1,TRINITY_DN70026_c1_g2,TRINITY_DN70156_c0_g5,TRINITY_DN70487_c0_g1,TRINITY_DN70831_c1_g2,TRINITY_DN71424_c1_g2,TRINITY_DN71554_c0_g1,TRINITY_DN71558_c1_g1,TRINITY_DN71855_c4_g2,TRINITY_DN72819_c0_g1,TRINITY_DN74568_c0_g3,TRINITY_DN76045_c0_g1,TRINITY_DN76917_c3_g1,TRINITY_DN77126_c1_g2,TRINITY_DN77126_c1_g3,TRINITY_DN78801_c1_g1,TRI…
GO:0043966	histone H3 acetylation	biological process	7/609	66/93642	2.7e-07	7.37802e-05	TRINITY_DN83047_c1_g1,TRINITY_DN91545_c0_g4,TRINITY_DN96368_c1_g3,TRINITY_DN96797_c0_g4,TRINITY_DN97461_c0_g1,TRINITY_DN97461_c0_g2,TRINITY_DN98212_c0_g1	TRINITY_DN83047_c1_g1,TRINITY_DN91545_c0_g4,TRINITY_DN96368_c1_g3,TRINITY_DN96797_c0_g4,TRINITY_DN97461_c0_g1,TRINITY_DN97461_c0_g2,TRINITY_DN98212_c0_g1
GO:0032774	RNA biosynthetic process	biological process	108/609	10188/93642	2.7e-07	7.37802e-05	TRINITY_DN66987_c0_g1,TRINITY_DN68255_c0_g1,TRINITY_DN68532_c1_g1,TRINITY_DN70026_c1_g2,TRINITY_DN70156_c0_g5,TRINITY_DN70487_c0_g1,TRINITY_DN70831_c1_g2,TRINITY_DN71424_c1_g2,TRINITY_DN71554_c0_g1,TRINITY_DN71558_c1_g1,TRINITY_DN71855_c4_g2,TRINITY_DN72819_c0_g1,TRINITY_DN74568_c0_g3,TRINITY_DN76045_c0_g1,TRINITY_DN76917_c3_g1,TRINITY_DN77126_c1_g2,TRINITY_DN77126_c1_g3,TRINITY_DN78801_c1_g1,TRI…	TRINITY_DN66987_c0_g1,TRINITY_DN68255_c0_g1,TRINITY_DN68532_c1_g1,TRINITY_DN70026_c1_g2,TRINITY_DN70156_c0_g5,TRINITY_DN70487_c0_g1,TRINITY_DN70831_c1_g2,TRINITY_DN71424_c1_g2,TRINITY_DN71554_c0_g1,TRINITY_DN71558_c1_g1,TRINITY_DN71855_c4_g2,TRINITY_DN72819_c0_g1,TRINITY_DN74568_c0_g3,TRINITY_DN76045_c0_g1,TRINITY_DN76917_c3_g1,TRINITY_DN77126_c1_g2,TRINITY_DN77126_c1_g3,TRINITY_DN78801_c1_g1,TRI…
GO:0060255	regulation of macromolecule metabolic process	biological process	123/609	12132/93642	3.6e-07	9.64447058823529e-05	TRINITY_DN66987_c0_g1,TRINITY_DN68255_c0_g1,TRINITY_DN70026_c1_g2,TRINITY_DN70421_c0_g1,TRINITY_DN70487_c0_g1,TRINITY_DN70723_c1_g1,TRINITY_DN70831_c1_g2,TRINITY_DN71424_c1_g2,TRINITY_DN71554_c0_g1,TRINITY_DN71855_c4_g2,TRINITY_DN71889_c1_g1,TRINITY_DN72303_c0_g1,TRINITY_DN72819_c0_g1,TRINITY_DN73324_c3_g1,TRINITY_DN73444_c1_g3,TRINITY_DN73493_c1_g1,TRINITY_DN74503_c1_g2,TRINITY_DN74568_c0_g3,TRI…	TRINITY_DN66987_c0_g1,TRINITY_DN68255_c0_g1,TRINITY_DN70026_c1_g2,TRINITY_DN70421_c0_g1,TRINITY_DN70487_c0_g1,TRINITY_DN70723_c1_g1,TRINITY_DN70831_c1_g2,TRINITY_DN71424_c1_g2,TRINITY_DN71554_c0_g1,TRINITY_DN71855_c4_g2,TRINITY_DN71889_c1_g1,TRINITY_DN72303_c0_g1,TRINITY_DN72819_c0_g1,TRINITY_DN73324_c3_g1,TRINITY_DN73444_c1_g3,TRINITY_DN73493_c1_g1,TRINITY_DN74503_c1_g2,TRINITY_DN74568_c0_g3,TRI…
GO:0009415	response to water	biological process	20/609	791/93642	3.9e-07	0.0001024725	TRINITY_DN73130_c0_g1,TRINITY_DN77049_c0_g3,TRINITY_DN81058_c1_g3,TRINITY_DN82502_c0_g1,TRINITY_DN82502_c0_g3,TRINITY_DN85946_c2_g2,TRINITY_DN86210_c0_g1,TRINITY_DN87533_c3_g4,TRINITY_DN87713_c1_g2,TRINITY_DN89102_c1_g1,TRINITY_DN91464_c3_g1,TRINITY_DN91644_c0_g1,TRINITY_DN92690_c1_g1,TRINITY_DN93209_c1_g1,TRINITY_DN93904_c1_g2,TRINITY_DN93943_c0_g3,TRINITY_DN96028_c0_g1,TRINITY_DN96354_c1_g1,TRI…	TRINITY_DN73130_c0_g1,TRINITY_DN77049_c0_g3,TRINITY_DN81058_c1_g3,TRINITY_DN82502_c0_g1,TRINITY_DN82502_c0_g3,TRINITY_DN85946_c2_g2,TRINITY_DN86210_c0_g1,TRINITY_DN87533_c3_g4,TRINITY_DN87713_c1_g2,TRINITY_DN89102_c1_g1,TRINITY_DN91464_c3_g1,TRINITY_DN91644_c0_g1,TRINITY_DN92690_c1_g1,TRINITY_DN93209_c1_g1,TRINITY_DN93904_c1_g2,TRINITY_DN93943_c0_g3,TRINITY_DN96028_c0_g1,TRINITY_DN96354_c1_g1,TRI…
GO:0050896	response to stimulus	biological process	223/609	25695/93642	4.6e-07	0.000116388518518519	TRINITY_DN63286_c0_g1,TRINITY_DN64594_c0_g1,TRINITY_DN66987_c0_g1,TRINITY_DN67158_c0_g1,TRINITY_DN68434_c0_g1,TRINITY_DN68475_c0_g1,TRINITY_DN68475_c0_g3,TRINITY_DN68532_c1_g1,TRINITY_DN69399_c0_g2,TRINITY_DN70026_c1_g2,TRINITY_DN70599_c1_g3,TRINITY_DN70626_c0_g2,TRINITY_DN70723_c1_g1,TRINITY_DN70911_c2_g1,TRINITY_DN71042_c0_g1,TRINITY_DN71143_c0_g1,TRINITY_DN71306_c1_g4,TRINITY_DN71424_c1_g2,TRI…	TRINITY_DN63286_c0_g1,TRINITY_DN64594_c0_g1,TRINITY_DN66987_c0_g1,TRINITY_DN67158_c0_g1,TRINITY_DN68434_c0_g1,TRINITY_DN68475_c0_g1,TRINITY_DN68475_c0_g3,TRINITY_DN68532_c1_g1,TRINITY_DN69399_c0_g2,TRINITY_DN70026_c1_g2,TRINITY_DN70599_c1_g3,TRINITY_DN70626_c0_g2,TRINITY_DN70723_c1_g1,TRINITY_DN70911_c2_g1,TRINITY_DN71042_c0_g1,TRINITY_DN71143_c0_g1,TRINITY_DN71306_c1_g4,TRINITY_DN71424_c1_g2,TRI…
GO:0019219	regulation of nucleobase-containing compound metabolic process	biological process	95/609	8704/93642	4.6e-07	0.000116388518518519	TRINITY_DN66987_c0_g1,TRINITY_DN68255_c0_g1,TRINITY_DN70026_c1_g2,TRINITY_DN70487_c0_g1,TRINITY_DN70831_c1_g2,TRINITY_DN71424_c1_g2,TRINITY_DN71554_c0_g1,TRINITY_DN71855_c4_g2,TRINITY_DN72819_c0_g1,TRINITY_DN74568_c0_g3,TRINITY_DN76045_c0_g1,TRINITY_DN77126_c1_g2,TRINITY_DN77126_c1_g3,TRINITY_DN78801_c1_g1,TRINITY_DN80370_c4_g5,TRINITY_DN80415_c0_g1,TRINITY_DN81128_c1_g1,TRINITY_DN81128_c3_g1,TRI…	TRINITY_DN66987_c0_g1,TRINITY_DN68255_c0_g1,TRINITY_DN70026_c1_g2,TRINITY_DN70487_c0_g1,TRINITY_DN70831_c1_g2,TRINITY_DN71424_c1_g2,TRINITY_DN71554_c0_g1,TRINITY_DN71855_c4_g2,TRINITY_DN72819_c0_g1,TRINITY_DN74568_c0_g3,TRINITY_DN76045_c0_g1,TRINITY_DN77126_c1_g2,TRINITY_DN77126_c1_g3,TRINITY_DN78801_c1_g1,TRINITY_DN80370_c4_g5,TRINITY_DN80415_c0_g1,TRINITY_DN81128_c1_g1,TRINITY_DN81128_c3_g1,TRI…
GO:0002238	response to molecule of fungal origin	biological process	8/609	105/93642	4.9e-07	0.000121724909090909	TRINITY_DN68475_c0_g1,TRINITY_DN68475_c0_g3,TRINITY_DN70599_c1_g3,TRINITY_DN72866_c0_g3,TRINITY_DN79594_c1_g2,TRINITY_DN87069_c0_g2,TRINITY_DN98582_c6_g1,TRINITY_DN98582_c6_g3	TRINITY_DN68475_c0_g1,TRINITY_DN68475_c0_g3,TRINITY_DN70599_c1_g3,TRINITY_DN72866_c0_g3,TRINITY_DN79594_c1_g2,TRINITY_DN87069_c0_g2,TRINITY_DN98582_c6_g1,TRINITY_DN98582_c6_g3
GO:0099402	plant organ development	biological process	37/609	2279/93642	5.4e-07	0.000131750357142857	TRINITY_DN68079_c0_g2,TRINITY_DN70487_c0_g1,TRINITY_DN73679_c0_g1,TRINITY_DN73679_c1_g2,TRINITY_DN74096_c1_g1,TRINITY_DN75121_c0_g4,TRINITY_DN75411_c0_g3,TRINITY_DN76045_c0_g1,TRINITY_DN77469_c0_g4,TRINITY_DN78453_c0_g1,TRINITY_DN80884_c0_g1,TRINITY_DN81232_c0_g1,TRINITY_DN82801_c0_g1,TRINITY_DN83719_c0_g4,TRINITY_DN84469_c1_g1,TRINITY_DN85750_c2_g1,TRINITY_DN86210_c0_g1,TRINITY_DN87261_c0_g2,TRI…	TRINITY_DN68079_c0_g2,TRINITY_DN70487_c0_g1,TRINITY_DN73679_c0_g1,TRINITY_DN73679_c1_g2,TRINITY_DN74096_c1_g1,TRINITY_DN75121_c0_g4,TRINITY_DN75411_c0_g3,TRINITY_DN76045_c0_g1,TRINITY_DN77469_c0_g4,TRINITY_DN78453_c0_g1,TRINITY_DN80884_c0_g1,TRINITY_DN81232_c0_g1,TRINITY_DN82801_c0_g1,TRINITY_DN83719_c0_g4,TRINITY_DN84469_c1_g1,TRINITY_DN85750_c2_g1,TRINITY_DN86210_c0_g1,TRINITY_DN87261_c0_g2,TRI…
GO:0044728	DNA methylation or demethylation	biological process	12/609	291/93642	6.1e-07	0.000146218070175439	TRINITY_DN70421_c0_g1,TRINITY_DN72819_c0_g1,TRINITY_DN80794_c0_g1,TRINITY_DN84336_c1_g2,TRINITY_DN89410_c0_g2,TRINITY_DN91784_c1_g1,TRINITY_DN94594_c0_g1,TRINITY_DN95775_c0_g1,TRINITY_DN96368_c1_g3,TRINITY_DN96797_c0_g4,TRINITY_DN97461_c0_g1,TRINITY_DN97461_c0_g2	TRINITY_DN70421_c0_g1,TRINITY_DN72819_c0_g1,TRINITY_DN80794_c0_g1,TRINITY_DN84336_c1_g2,TRINITY_DN89410_c0_g2,TRINITY_DN91784_c1_g1,TRINITY_DN94594_c0_g1,TRINITY_DN95775_c0_g1,TRINITY_DN96368_c1_g3,TRINITY_DN96797_c0_g4,TRINITY_DN97461_c0_g1,TRINITY_DN97461_c0_g2
GO:0009620	response to fungus	biological process	22/609	986/93642	8.3e-07	0.00019552224137931	TRINITY_DN68475_c0_g1,TRINITY_DN68475_c0_g3,TRINITY_DN70599_c1_g3,TRINITY_DN72866_c0_g3,TRINITY_DN75340_c0_g3,TRINITY_DN79594_c1_g2,TRINITY_DN84469_c1_g1,TRINITY_DN86350_c0_g1,TRINITY_DN86350_c0_g2,TRINITY_DN87069_c0_g2,TRINITY_DN90512_c0_g2,TRINITY_DN95530_c0_g1,TRINITY_DN95617_c1_g4,TRINITY_DN96097_c3_g2,TRINITY_DN96097_c3_g4,TRINITY_DN97471_c1_g1,TRINITY_DN97761_c2_g3,TRINITY_DN97970_c2_g1,TRI…	TRINITY_DN68475_c0_g1,TRINITY_DN68475_c0_g3,TRINITY_DN70599_c1_g3,TRINITY_DN72866_c0_g3,TRINITY_DN75340_c0_g3,TRINITY_DN79594_c1_g2,TRINITY_DN84469_c1_g1,TRINITY_DN86350_c0_g1,TRINITY_DN86350_c0_g2,TRINITY_DN87069_c0_g2,TRINITY_DN90512_c0_g2,TRINITY_DN95530_c0_g1,TRINITY_DN95617_c1_g4,TRINITY_DN96097_c3_g2,TRINITY_DN96097_c3_g4,TRINITY_DN97471_c1_g1,TRINITY_DN97761_c2_g3,TRINITY_DN97970_c2_g1,TRI…
GO:0006304	DNA modification	biological process	12/609	301/93642	8.7e-07	0.000201471355932203	TRINITY_DN70421_c0_g1,TRINITY_DN72819_c0_g1,TRINITY_DN80794_c0_g1,TRINITY_DN84336_c1_g2,TRINITY_DN89410_c0_g2,TRINITY_DN91784_c1_g1,TRINITY_DN94594_c0_g1,TRINITY_DN95775_c0_g1,TRINITY_DN96368_c1_g3,TRINITY_DN96797_c0_g4,TRINITY_DN97461_c0_g1,TRINITY_DN97461_c0_g2	TRINITY_DN70421_c0_g1,TRINITY_DN72819_c0_g1,TRINITY_DN80794_c0_g1,TRINITY_DN84336_c1_g2,TRINITY_DN89410_c0_g2,TRINITY_DN91784_c1_g1,TRINITY_DN94594_c0_g1,TRINITY_DN95775_c0_g1,TRINITY_DN96368_c1_g3,TRINITY_DN96797_c0_g4,TRINITY_DN97461_c0_g1,TRINITY_DN97461_c0_g2
GO:2000112	regulation of cellular macromolecule biosynthetic process	biological process	100/609	9513/93642	1.2e-06	0.00027326	TRINITY_DN66987_c0_g1,TRINITY_DN68255_c0_g1,TRINITY_DN70026_c1_g2,TRINITY_DN70487_c0_g1,TRINITY_DN70723_c1_g1,TRINITY_DN70831_c1_g2,TRINITY_DN71424_c1_g2,TRINITY_DN71554_c0_g1,TRINITY_DN71855_c4_g2,TRINITY_DN72303_c0_g1,TRINITY_DN72819_c0_g1,TRINITY_DN74568_c0_g3,TRINITY_DN76045_c0_g1,TRINITY_DN77126_c1_g2,TRINITY_DN77126_c1_g3,TRINITY_DN78801_c1_g1,TRINITY_DN80370_c4_g5,TRINITY_DN80415_c0_g1,TRI…	TRINITY_DN66987_c0_g1,TRINITY_DN68255_c0_g1,TRINITY_DN70026_c1_g2,TRINITY_DN70487_c0_g1,TRINITY_DN70723_c1_g1,TRINITY_DN70831_c1_g2,TRINITY_DN71424_c1_g2,TRINITY_DN71554_c0_g1,TRINITY_DN71855_c4_g2,TRINITY_DN72303_c0_g1,TRINITY_DN72819_c0_g1,TRINITY_DN74568_c0_g3,TRINITY_DN76045_c0_g1,TRINITY_DN77126_c1_g2,TRINITY_DN77126_c1_g3,TRINITY_DN78801_c1_g1,TRINITY_DN80370_c4_g5,TRINITY_DN80415_c0_g1,TRI…
GO:0048507	meristem development	biological process	18/609	709/93642	1.4e-06	0.000313577049180328	TRINITY_DN70156_c0_g5,TRINITY_DN71143_c0_g1,TRINITY_DN71424_c1_g2,TRINITY_DN74691_c0_g3,TRINITY_DN77099_c0_g1,TRINITY_DN80004_c0_g1,TRINITY_DN81232_c0_g1,TRINITY_DN86210_c0_g1,TRINITY_DN89685_c1_g2,TRINITY_DN90620_c1_g1,TRINITY_DN90685_c2_g1,TRINITY_DN92488_c0_g1,TRINITY_DN93594_c0_g1,TRINITY_DN93943_c0_g3,TRINITY_DN95777_c4_g2,TRINITY_DN97262_c0_g2,TRINITY_DN98595_c1_g3,TRINITY_DN98683_c5_g1	TRINITY_DN70156_c0_g5,TRINITY_DN71143_c0_g1,TRINITY_DN71424_c1_g2,TRINITY_DN74691_c0_g3,TRINITY_DN77099_c0_g1,TRINITY_DN80004_c0_g1,TRINITY_DN81232_c0_g1,TRINITY_DN86210_c0_g1,TRINITY_DN89685_c1_g2,TRINITY_DN90620_c1_g1,TRINITY_DN90685_c2_g1,TRINITY_DN92488_c0_g1,TRINITY_DN93594_c0_g1,TRINITY_DN93943_c0_g3,TRINITY_DN95777_c4_g2,TRINITY_DN97262_c0_g2,TRINITY_DN98595_c1_g3,TRINITY_DN98683_c5_g1
GO:0010556	regulation of macromolecule biosynthetic process	biological process	100/609	9568/93642	1.5e-06	0.000330556451612903	TRINITY_DN66987_c0_g1,TRINITY_DN68255_c0_g1,TRINITY_DN70026_c1_g2,TRINITY_DN70487_c0_g1,TRINITY_DN70723_c1_g1,TRINITY_DN70831_c1_g2,TRINITY_DN71424_c1_g2,TRINITY_DN71554_c0_g1,TRINITY_DN71855_c4_g2,TRINITY_DN72303_c0_g1,TRINITY_DN72819_c0_g1,TRINITY_DN74568_c0_g3,TRINITY_DN76045_c0_g1,TRINITY_DN77126_c1_g2,TRINITY_DN77126_c1_g3,TRINITY_DN78801_c1_g1,TRINITY_DN80370_c4_g5,TRINITY_DN80415_c0_g1,TRI…	TRINITY_DN66987_c0_g1,TRINITY_DN68255_c0_g1,TRINITY_DN70026_c1_g2,TRINITY_DN70487_c0_g1,TRINITY_DN70723_c1_g1,TRINITY_DN70831_c1_g2,TRINITY_DN71424_c1_g2,TRINITY_DN71554_c0_g1,TRINITY_DN71855_c4_g2,TRINITY_DN72303_c0_g1,TRINITY_DN72819_c0_g1,TRINITY_DN74568_c0_g3,TRINITY_DN76045_c0_g1,TRINITY_DN77126_c1_g2,TRINITY_DN77126_c1_g3,TRINITY_DN78801_c1_g1,TRINITY_DN80370_c4_g5,TRINITY_DN80415_c0_g1,TRI…
GO:0009628	response to abiotic stimulus	biological process	69/609	5846/93642	1.6e-06	0.00033632	TRINITY_DN64594_c0_g1,TRINITY_DN66987_c0_g1,TRINITY_DN67158_c0_g1,TRINITY_DN70626_c0_g2,TRINITY_DN71558_c1_g1,TRINITY_DN73130_c0_g1,TRINITY_DN73324_c3_g1,TRINITY_DN73363_c2_g1,TRINITY_DN73575_c3_g3,TRINITY_DN74096_c1_g1,TRINITY_DN74684_c0_g2,TRINITY_DN74996_c0_g1,TRINITY_DN76380_c0_g1,TRINITY_DN77049_c0_g3,TRINITY_DN77929_c0_g2,TRINITY_DN78240_c2_g4,TRINITY_DN78453_c0_g1,TRINITY_DN79475_c1_g2,TRI…	TRINITY_DN64594_c0_g1,TRINITY_DN66987_c0_g1,TRINITY_DN67158_c0_g1,TRINITY_DN70626_c0_g2,TRINITY_DN71558_c1_g1,TRINITY_DN73130_c0_g1,TRINITY_DN73324_c3_g1,TRINITY_DN73363_c2_g1,TRINITY_DN73575_c3_g3,TRINITY_DN74096_c1_g1,TRINITY_DN74684_c0_g2,TRINITY_DN74996_c0_g1,TRINITY_DN76380_c0_g1,TRINITY_DN77049_c0_g3,TRINITY_DN77929_c0_g2,TRINITY_DN78240_c2_g4,TRINITY_DN78453_c0_g1,TRINITY_DN79475_c1_g2,TRI…
GO:1905392	plant organ morphogenesis	biological process	20/609	867/93642	1.6e-06	0.00033632	TRINITY_DN68079_c0_g2,TRINITY_DN73679_c0_g1,TRINITY_DN75411_c0_g3,TRINITY_DN76045_c0_g1,TRINITY_DN80884_c0_g1,TRINITY_DN81232_c0_g1,TRINITY_DN82801_c0_g1,TRINITY_DN86210_c0_g1,TRINITY_DN87261_c0_g2,TRINITY_DN89685_c1_g2,TRINITY_DN92410_c0_g3,TRINITY_DN92488_c0_g1,TRINITY_DN92972_c1_g1,TRINITY_DN93943_c0_g3,TRINITY_DN94649_c0_g3,TRINITY_DN96030_c0_g1,TRINITY_DN97471_c1_g1,TRINITY_DN97936_c1_g1,TRI…	TRINITY_DN68079_c0_g2,TRINITY_DN73679_c0_g1,TRINITY_DN75411_c0_g3,TRINITY_DN76045_c0_g1,TRINITY_DN80884_c0_g1,TRINITY_DN81232_c0_g1,TRINITY_DN82801_c0_g1,TRINITY_DN86210_c0_g1,TRINITY_DN87261_c0_g2,TRINITY_DN89685_c1_g2,TRINITY_DN92410_c0_g3,TRINITY_DN92488_c0_g1,TRINITY_DN92972_c1_g1,TRINITY_DN93943_c0_g3,TRINITY_DN94649_c0_g3,TRINITY_DN96030_c0_g1,TRINITY_DN97471_c1_g1,TRINITY_DN97936_c1_g1,TRI…
GO:1905393	plant organ formation	biological process	11/609	264/93642	1.6e-06	0.00033632	TRINITY_DN74872_c1_g1,TRINITY_DN75121_c0_g4,TRINITY_DN75411_c0_g3,TRINITY_DN76045_c0_g1,TRINITY_DN82801_c0_g1,TRINITY_DN83047_c1_g1,TRINITY_DN91545_c0_g4,TRINITY_DN92488_c0_g1,TRINITY_DN94649_c0_g3,TRINITY_DN95511_c3_g4,TRINITY_DN96030_c0_g1	TRINITY_DN74872_c1_g1,TRINITY_DN75121_c0_g4,TRINITY_DN75411_c0_g3,TRINITY_DN76045_c0_g1,TRINITY_DN82801_c0_g1,TRINITY_DN83047_c1_g1,TRINITY_DN91545_c0_g4,TRINITY_DN92488_c0_g1,TRINITY_DN94649_c0_g3,TRINITY_DN95511_c3_g4,TRINITY_DN96030_c0_g1
GO:0009834	plant-type secondary cell wall biogenesis	biological process	8/609	128/93642	2.2e-06	0.000448635820895522	TRINITY_DN68532_c1_g1,TRINITY_DN80415_c0_g1,TRINITY_DN82528_c0_g1,TRINITY_DN88959_c0_g1,TRINITY_DN89487_c0_g3,TRINITY_DN91323_c1_g5,TRINITY_DN91736_c1_g1,TRINITY_DN99026_c3_g1	TRINITY_DN68532_c1_g1,TRINITY_DN80415_c0_g1,TRINITY_DN82528_c0_g1,TRINITY_DN88959_c0_g1,TRINITY_DN89487_c0_g3,TRINITY_DN91323_c1_g5,TRINITY_DN91736_c1_g1,TRINITY_DN99026_c3_g1
GO:0010154	fruit development	biological process	27/609	1477/93642	2.2e-06	0.000448635820895522	TRINITY_DN68079_c0_g2,TRINITY_DN74691_c0_g3,TRINITY_DN75340_c0_g2,TRINITY_DN75340_c0_g3,TRINITY_DN80004_c0_g1,TRINITY_DN80884_c0_g1,TRINITY_DN82761_c1_g1,TRINITY_DN82775_c4_g1,TRINITY_DN85282_c1_g2,TRINITY_DN89685_c1_g2,TRINITY_DN91813_c0_g2,TRINITY_DN92488_c0_g1,TRINITY_DN92690_c1_g1,TRINITY_DN92736_c1_g3,TRINITY_DN93254_c0_g1,TRINITY_DN94037_c1_g2,TRINITY_DN94454_c1_g3,TRINITY_DN94594_c0_g1,TRI…	TRINITY_DN68079_c0_g2,TRINITY_DN74691_c0_g3,TRINITY_DN75340_c0_g2,TRINITY_DN75340_c0_g3,TRINITY_DN80004_c0_g1,TRINITY_DN80884_c0_g1,TRINITY_DN82761_c1_g1,TRINITY_DN82775_c4_g1,TRINITY_DN85282_c1_g2,TRINITY_DN89685_c1_g2,TRINITY_DN91813_c0_g2,TRINITY_DN92488_c0_g1,TRINITY_DN92690_c1_g1,TRINITY_DN92736_c1_g3,TRINITY_DN93254_c0_g1,TRINITY_DN94037_c1_g2,TRINITY_DN94454_c1_g3,TRINITY_DN94594_c0_g1,TRI…
GO:0007017	microtubule-based process	biological process	25/609	1326/93642	3.1e-06	0.000622872058823529	TRINITY_DN73679_c1_g2,TRINITY_DN74512_c3_g1,TRINITY_DN77234_c1_g2,TRINITY_DN77469_c0_g1,TRINITY_DN78689_c0_g1,TRINITY_DN79570_c1_g1,TRINITY_DN80494_c0_g1,TRINITY_DN80532_c2_g2,TRINITY_DN80965_c0_g4,TRINITY_DN81644_c0_g1,TRINITY_DN82769_c1_g2,TRINITY_DN84678_c0_g1,TRINITY_DN86240_c0_g1,TRINITY_DN89157_c0_g1,TRINITY_DN90122_c0_g1,TRINITY_DN91033_c2_g2,TRINITY_DN92330_c1_g2,TRINITY_DN92678_c1_g2,TRI…	TRINITY_DN73679_c1_g2,TRINITY_DN74512_c3_g1,TRINITY_DN77234_c1_g2,TRINITY_DN77469_c0_g1,TRINITY_DN78689_c0_g1,TRINITY_DN79570_c1_g1,TRINITY_DN80494_c0_g1,TRINITY_DN80532_c2_g2,TRINITY_DN80965_c0_g4,TRINITY_DN81644_c0_g1,TRINITY_DN82769_c1_g2,TRINITY_DN84678_c0_g1,TRINITY_DN86240_c0_g1,TRINITY_DN89157_c0_g1,TRINITY_DN90122_c0_g1,TRINITY_DN91033_c2_g2,TRINITY_DN92330_c1_g2,TRINITY_DN92678_c1_g2,TRI…
GO:0031326	regulation of cellular biosynthetic process	biological process	101/609	9864/93642	3.3e-06	0.000653447826086957	TRINITY_DN66987_c0_g1,TRINITY_DN68255_c0_g1,TRINITY_DN70026_c1_g2,TRINITY_DN70487_c0_g1,TRINITY_DN70723_c1_g1,TRINITY_DN70831_c1_g2,TRINITY_DN71424_c1_g2,TRINITY_DN71554_c0_g1,TRINITY_DN71855_c4_g2,TRINITY_DN72303_c0_g1,TRINITY_DN72819_c0_g1,TRINITY_DN74568_c0_g3,TRINITY_DN76045_c0_g1,TRINITY_DN77126_c1_g2,TRINITY_DN77126_c1_g3,TRINITY_DN78801_c1_g1,TRINITY_DN80370_c4_g5,TRINITY_DN80415_c0_g1,TRI…	TRINITY_DN66987_c0_g1,TRINITY_DN68255_c0_g1,TRINITY_DN70026_c1_g2,TRINITY_DN70487_c0_g1,TRINITY_DN70723_c1_g1,TRINITY_DN70831_c1_g2,TRINITY_DN71424_c1_g2,TRINITY_DN71554_c0_g1,TRINITY_DN71855_c4_g2,TRINITY_DN72303_c0_g1,TRINITY_DN72819_c0_g1,TRINITY_DN74568_c0_g3,TRINITY_DN76045_c0_g1,TRINITY_DN77126_c1_g2,TRINITY_DN77126_c1_g3,TRINITY_DN78801_c1_g1,TRINITY_DN80370_c4_g5,TRINITY_DN80415_c0_g1,TRI…
GO:0050794	regulation of cellular process	biological process	191/609	21898/93642	3.9e-06	0.000750502816901408	TRINITY_DN66987_c0_g1,TRINITY_DN68255_c0_g1,TRINITY_DN68434_c0_g1,TRINITY_DN68532_c1_g1,TRINITY_DN69399_c0_g2,TRINITY_DN69726_c2_g1,TRINITY_DN70026_c1_g2,TRINITY_DN70487_c0_g1,TRINITY_DN70723_c1_g1,TRINITY_DN70831_c1_g2,TRINITY_DN70911_c2_g1,TRINITY_DN71143_c0_g1,TRINITY_DN71424_c1_g2,TRINITY_DN71554_c0_g1,TRINITY_DN71558_c1_g1,TRINITY_DN71855_c4_g2,TRINITY_DN72303_c0_g1,TRINITY_DN72442_c2_g3,TRI…	TRINITY_DN66987_c0_g1,TRINITY_DN68255_c0_g1,TRINITY_DN68434_c0_g1,TRINITY_DN68532_c1_g1,TRINITY_DN69399_c0_g2,TRINITY_DN69726_c2_g1,TRINITY_DN70026_c1_g2,TRINITY_DN70487_c0_g1,TRINITY_DN70723_c1_g1,TRINITY_DN70831_c1_g2,TRINITY_DN70911_c2_g1,TRINITY_DN71143_c0_g1,TRINITY_DN71424_c1_g2,TRINITY_DN71554_c0_g1,TRINITY_DN71558_c1_g1,TRINITY_DN71855_c4_g2,TRINITY_DN72303_c0_g1,TRINITY_DN72442_c2_g3,TRI…
GO:0016036	cellular response to phosphate starvation	biological process	8/609	138/93642	3.9e-06	0.000750502816901408	TRINITY_DN86210_c0_g1,TRINITY_DN90512_c0_g2,TRINITY_DN90685_c2_g1,TRINITY_DN93943_c0_g3,TRINITY_DN94649_c0_g3,TRINITY_DN96351_c1_g2,TRINITY_DN96502_c0_g2,TRINITY_DN96502_c0_g4	TRINITY_DN86210_c0_g1,TRINITY_DN90512_c0_g2,TRINITY_DN90685_c2_g1,TRINITY_DN93943_c0_g3,TRINITY_DN94649_c0_g3,TRINITY_DN96351_c1_g2,TRINITY_DN96502_c0_g2,TRINITY_DN96502_c0_g4
GO:0009889	regulation of biosynthetic process	biological process	101/609	9921/93642	4.2e-06	0.000797008333333333	TRINITY_DN66987_c0_g1,TRINITY_DN68255_c0_g1,TRINITY_DN70026_c1_g2,TRINITY_DN70487_c0_g1,TRINITY_DN70723_c1_g1,TRINITY_DN70831_c1_g2,TRINITY_DN71424_c1_g2,TRINITY_DN71554_c0_g1,TRINITY_DN71855_c4_g2,TRINITY_DN72303_c0_g1,TRINITY_DN72819_c0_g1,TRINITY_DN74568_c0_g3,TRINITY_DN76045_c0_g1,TRINITY_DN77126_c1_g2,TRINITY_DN77126_c1_g3,TRINITY_DN78801_c1_g1,TRINITY_DN80370_c4_g5,TRINITY_DN80415_c0_g1,TRI…	TRINITY_DN66987_c0_g1,TRINITY_DN68255_c0_g1,TRINITY_DN70026_c1_g2,TRINITY_DN70487_c0_g1,TRINITY_DN70723_c1_g1,TRINITY_DN70831_c1_g2,TRINITY_DN71424_c1_g2,TRINITY_DN71554_c0_g1,TRINITY_DN71855_c4_g2,TRINITY_DN72303_c0_g1,TRINITY_DN72819_c0_g1,TRINITY_DN74568_c0_g3,TRINITY_DN76045_c0_g1,TRINITY_DN77126_c1_g2,TRINITY_DN77126_c1_g3,TRINITY_DN78801_c1_g1,TRINITY_DN80370_c4_g5,TRINITY_DN80415_c0_g1,TRI…
GO:0009653	anatomical structure morphogenesis	biological process	56/609	4533/93642	4.4e-06	0.000823523287671233	TRINITY_DN68079_c0_g2,TRINITY_DN70156_c0_g5,TRINITY_DN70911_c2_g1,TRINITY_DN71143_c0_g1,TRINITY_DN73145_c2_g1,TRINITY_DN73374_c1_g2,TRINITY_DN73679_c0_g1,TRINITY_DN74691_c0_g3,TRINITY_DN74872_c1_g1,TRINITY_DN74996_c0_g1,TRINITY_DN75121_c0_g4,TRINITY_DN75411_c0_g3,TRINITY_DN76045_c0_g1,TRINITY_DN77099_c0_g1,TRINITY_DN77296_c1_g1,TRINITY_DN78801_c1_g1,TRINITY_DN80004_c0_g1,TRINITY_DN80373_c0_g1,TRI…	TRINITY_DN68079_c0_g2,TRINITY_DN70156_c0_g5,TRINITY_DN70911_c2_g1,TRINITY_DN71143_c0_g1,TRINITY_DN73145_c2_g1,TRINITY_DN73374_c1_g2,TRINITY_DN73679_c0_g1,TRINITY_DN74691_c0_g3,TRINITY_DN74872_c1_g1,TRINITY_DN74996_c0_g1,TRINITY_DN75121_c0_g4,TRINITY_DN75411_c0_g3,TRINITY_DN76045_c0_g1,TRINITY_DN77099_c0_g1,TRINITY_DN77296_c1_g1,TRINITY_DN78801_c1_g1,TRINITY_DN80004_c0_g1,TRINITY_DN80373_c0_g1,TRI…
GO:0048316	seed development	biological process	25/609	1362/93642	4.9e-06	0.000904712162162162	TRINITY_DN68079_c0_g2,TRINITY_DN74691_c0_g3,TRINITY_DN80004_c0_g1,TRINITY_DN80884_c0_g1,TRINITY_DN82761_c1_g1,TRINITY_DN82775_c4_g1,TRINITY_DN85282_c1_g2,TRINITY_DN89685_c1_g2,TRINITY_DN91813_c0_g2,TRINITY_DN92488_c0_g1,TRINITY_DN92690_c1_g1,TRINITY_DN92736_c1_g3,TRINITY_DN93254_c0_g1,TRINITY_DN94037_c1_g2,TRINITY_DN94454_c1_g3,TRINITY_DN94594_c0_g1,TRINITY_DN95777_c4_g2,TRINITY_DN96030_c0_g1,TRI…	TRINITY_DN68079_c0_g2,TRINITY_DN74691_c0_g3,TRINITY_DN80004_c0_g1,TRINITY_DN80884_c0_g1,TRINITY_DN82761_c1_g1,TRINITY_DN82775_c4_g1,TRINITY_DN85282_c1_g2,TRINITY_DN89685_c1_g2,TRINITY_DN91813_c0_g2,TRINITY_DN92488_c0_g1,TRINITY_DN92690_c1_g1,TRINITY_DN92736_c1_g3,TRINITY_DN93254_c0_g1,TRINITY_DN94037_c1_g2,TRINITY_DN94454_c1_g3,TRINITY_DN94594_c0_g1,TRINITY_DN95777_c4_g2,TRINITY_DN96030_c0_g1,TRI…
GO:0009833	plant-type primary cell wall biogenesis	biological process	5/609	41/93642	7.1e-06	0.00129343066666667	TRINITY_DN64594_c0_g1,TRINITY_DN80965_c0_g4,TRINITY_DN82458_c1_g1,TRINITY_DN89487_c0_g3,TRINITY_DN99026_c3_g1	TRINITY_DN64594_c0_g1,TRINITY_DN80965_c0_g4,TRINITY_DN82458_c1_g1,TRINITY_DN89487_c0_g3,TRINITY_DN99026_c3_g1
GO:0022622	root system development	biological process	23/609	1218/93642	7.4e-06	0.00133034473684211	TRINITY_DN73679_c0_g1,TRINITY_DN73679_c1_g2,TRINITY_DN75411_c0_g3,TRINITY_DN76045_c0_g1,TRINITY_DN78453_c0_g1,TRINITY_DN80884_c0_g1,TRINITY_DN81232_c0_g1,TRINITY_DN86210_c0_g1,TRINITY_DN87261_c0_g2,TRINITY_DN88078_c1_g2,TRINITY_DN88748_c0_g4,TRINITY_DN89685_c1_g2,TRINITY_DN91758_c3_g4,TRINITY_DN92410_c0_g3,TRINITY_DN92972_c1_g1,TRINITY_DN93943_c0_g3,TRINITY_DN94649_c0_g3,TRINITY_DN94878_c0_g1,TRI…	TRINITY_DN73679_c0_g1,TRINITY_DN73679_c1_g2,TRINITY_DN75411_c0_g3,TRINITY_DN76045_c0_g1,TRINITY_DN78453_c0_g1,TRINITY_DN80884_c0_g1,TRINITY_DN81232_c0_g1,TRINITY_DN86210_c0_g1,TRINITY_DN87261_c0_g2,TRINITY_DN88078_c1_g2,TRINITY_DN88748_c0_g4,TRINITY_DN89685_c1_g2,TRINITY_DN91758_c3_g4,TRINITY_DN92410_c0_g3,TRINITY_DN92972_c1_g1,TRINITY_DN93943_c0_g3,TRINITY_DN94649_c0_g3,TRINITY_DN94878_c0_g1,TRI…
GO:0031323	regulation of cellular metabolic process	biological process	114/609	11774/93642	9.2e-06	0.00163246233766234	TRINITY_DN66987_c0_g1,TRINITY_DN68255_c0_g1,TRINITY_DN70026_c1_g2,TRINITY_DN70487_c0_g1,TRINITY_DN70723_c1_g1,TRINITY_DN70831_c1_g2,TRINITY_DN71424_c1_g2,TRINITY_DN71554_c0_g1,TRINITY_DN71855_c4_g2,TRINITY_DN72303_c0_g1,TRINITY_DN72819_c0_g1,TRINITY_DN74568_c0_g3,TRINITY_DN75121_c0_g4,TRINITY_DN75231_c0_g1,TRINITY_DN76045_c0_g1,TRINITY_DN77126_c1_g2,TRINITY_DN77126_c1_g3,TRINITY_DN78801_c1_g1,TRI…	TRINITY_DN66987_c0_g1,TRINITY_DN68255_c0_g1,TRINITY_DN70026_c1_g2,TRINITY_DN70487_c0_g1,TRINITY_DN70723_c1_g1,TRINITY_DN70831_c1_g2,TRINITY_DN71424_c1_g2,TRINITY_DN71554_c0_g1,TRINITY_DN71855_c4_g2,TRINITY_DN72303_c0_g1,TRINITY_DN72819_c0_g1,TRINITY_DN74568_c0_g3,TRINITY_DN75121_c0_g4,TRINITY_DN75231_c0_g1,TRINITY_DN76045_c0_g1,TRINITY_DN77126_c1_g2,TRINITY_DN77126_c1_g3,TRINITY_DN78801_c1_g1,TRI…
GO:0031935	regulation of chromatin silencing	biological process	7/609	112/93642	9.5e-06	0.00166408333333333	TRINITY_DN72819_c0_g1,TRINITY_DN83047_c1_g1,TRINITY_DN89410_c0_g2,TRINITY_DN91545_c0_g4,TRINITY_DN91784_c1_g1,TRINITY_DN93339_c1_g1,TRINITY_DN95775_c0_g1	TRINITY_DN72819_c0_g1,TRINITY_DN83047_c1_g1,TRINITY_DN89410_c0_g2,TRINITY_DN91545_c0_g4,TRINITY_DN91784_c1_g1,TRINITY_DN93339_c1_g1,TRINITY_DN95775_c0_g1
GO:0015630	microtubule cytoskeleton	cellular component	32/648	2064/96716	1.5e-05	0.00167294117647059	TRINITY_DN73679_c1_g2,TRINITY_DN74512_c3_g1,TRINITY_DN75496_c1_g1,TRINITY_DN77234_c1_g2,TRINITY_DN77469_c0_g1,TRINITY_DN79570_c1_g1,TRINITY_DN79731_c0_g1,TRINITY_DN80494_c0_g1,TRINITY_DN80532_c2_g2,TRINITY_DN81644_c0_g1,TRINITY_DN82769_c1_g2,TRINITY_DN84678_c0_g1,TRINITY_DN85222_c1_g2,TRINITY_DN86674_c0_g3,TRINITY_DN89157_c0_g1,TRINITY_DN89317_c0_g1,TRINITY_DN90122_c0_g1,TRINITY_DN90376_c0_g3,TRI…	TRINITY_DN73679_c1_g2,TRINITY_DN74512_c3_g1,TRINITY_DN75496_c1_g1,TRINITY_DN77234_c1_g2,TRINITY_DN77469_c0_g1,TRINITY_DN79570_c1_g1,TRINITY_DN79731_c0_g1,TRINITY_DN80494_c0_g1,TRINITY_DN80532_c2_g2,TRINITY_DN81644_c0_g1,TRINITY_DN82769_c1_g2,TRINITY_DN84678_c0_g1,TRINITY_DN85222_c1_g2,TRINITY_DN86674_c0_g3,TRINITY_DN89157_c0_g1,TRINITY_DN89317_c0_g1,TRINITY_DN90122_c0_g1,TRINITY_DN90376_c0_g3,TRI…
GO:0009505	plant-type cell wall	cellular component	14/648	522/96716	1.5e-05	0.00167294117647059	TRINITY_DN74461_c0_g1,TRINITY_DN76130_c0_g2,TRINITY_DN80065_c0_g3,TRINITY_DN84083_c0_g2,TRINITY_DN86350_c0_g1,TRINITY_DN86350_c0_g2,TRINITY_DN90918_c0_g2,TRINITY_DN94767_c1_g3,TRINITY_DN95067_c0_g2,TRINITY_DN95511_c3_g4,TRINITY_DN95948_c1_g4,TRINITY_DN96045_c0_g1,TRINITY_DN97077_c0_g1,TRINITY_DN98955_c1_g3	TRINITY_DN74461_c0_g1,TRINITY_DN76130_c0_g2,TRINITY_DN80065_c0_g3,TRINITY_DN84083_c0_g2,TRINITY_DN86350_c0_g1,TRINITY_DN86350_c0_g2,TRINITY_DN90918_c0_g2,TRINITY_DN94767_c1_g3,TRINITY_DN95067_c0_g2,TRINITY_DN95511_c3_g4,TRINITY_DN95948_c1_g4,TRINITY_DN96045_c0_g1,TRINITY_DN97077_c0_g1,TRINITY_DN98955_c1_g3
GO:0009793	embryo development ending in seed dormancy	biological process	20/609	981/93642	9.7e-06	0.00167760886075949	TRINITY_DN68079_c0_g2,TRINITY_DN74691_c0_g3,TRINITY_DN80004_c0_g1,TRINITY_DN80884_c0_g1,TRINITY_DN82761_c1_g1,TRINITY_DN82775_c4_g1,TRINITY_DN89685_c1_g2,TRINITY_DN92736_c1_g3,TRINITY_DN94037_c1_g2,TRINITY_DN94454_c1_g3,TRINITY_DN94594_c0_g1,TRINITY_DN95777_c4_g2,TRINITY_DN96030_c0_g1,TRINITY_DN96139_c1_g1,TRINITY_DN96892_c2_g1,TRINITY_DN97232_c2_g1,TRINITY_DN97993_c1_g1,TRINITY_DN98453_c1_g1,TRI…	TRINITY_DN68079_c0_g2,TRINITY_DN74691_c0_g3,TRINITY_DN80004_c0_g1,TRINITY_DN80884_c0_g1,TRINITY_DN82761_c1_g1,TRINITY_DN82775_c4_g1,TRINITY_DN89685_c1_g2,TRINITY_DN92736_c1_g3,TRINITY_DN94037_c1_g2,TRINITY_DN94454_c1_g3,TRINITY_DN94594_c0_g1,TRINITY_DN95777_c4_g2,TRINITY_DN96030_c0_g1,TRINITY_DN96139_c1_g1,TRINITY_DN96892_c2_g1,TRINITY_DN97232_c2_g1,TRINITY_DN97993_c1_g1,TRINITY_DN98453_c1_g1,TRI…
GO:0009524	phragmoplast	cellular component	12/648	388/96716	1.6e-05	0.00168533333333333	TRINITY_DN71284_c1_g1,TRINITY_DN73679_c1_g2,TRINITY_DN75496_c1_g1,TRINITY_DN77234_c1_g2,TRINITY_DN77469_c0_g1,TRINITY_DN79570_c1_g1,TRINITY_DN83889_c0_g2,TRINITY_DN90376_c0_g3,TRINITY_DN92330_c1_g2,TRINITY_DN93760_c2_g1,TRINITY_DN97495_c2_g1,TRINITY_DN98258_c0_g1	TRINITY_DN71284_c1_g1,TRINITY_DN73679_c1_g2,TRINITY_DN75496_c1_g1,TRINITY_DN77234_c1_g2,TRINITY_DN77469_c0_g1,TRINITY_DN79570_c1_g1,TRINITY_DN83889_c0_g2,TRINITY_DN90376_c0_g3,TRINITY_DN92330_c1_g2,TRINITY_DN93760_c2_g1,TRINITY_DN97495_c2_g1,TRINITY_DN98258_c0_g1
GO:0009790	embryo development	biological process	25/609	1422/93642	1.0e-05	0.001707875	TRINITY_DN68079_c0_g2,TRINITY_DN74691_c0_g3,TRINITY_DN80004_c0_g1,TRINITY_DN80884_c0_g1,TRINITY_DN82761_c1_g1,TRINITY_DN82775_c4_g1,TRINITY_DN86210_c0_g1,TRINITY_DN89398_c0_g1,TRINITY_DN89685_c1_g2,TRINITY_DN92736_c1_g3,TRINITY_DN93850_c1_g5,TRINITY_DN93943_c0_g3,TRINITY_DN94037_c1_g2,TRINITY_DN94454_c1_g3,TRINITY_DN94594_c0_g1,TRINITY_DN95777_c4_g2,TRINITY_DN96030_c0_g1,TRINITY_DN96139_c1_g1,TRI…	TRINITY_DN68079_c0_g2,TRINITY_DN74691_c0_g3,TRINITY_DN80004_c0_g1,TRINITY_DN80884_c0_g1,TRINITY_DN82761_c1_g1,TRINITY_DN82775_c4_g1,TRINITY_DN86210_c0_g1,TRINITY_DN89398_c0_g1,TRINITY_DN89685_c1_g2,TRINITY_DN92736_c1_g3,TRINITY_DN93850_c1_g5,TRINITY_DN93943_c0_g3,TRINITY_DN94037_c1_g2,TRINITY_DN94454_c1_g3,TRINITY_DN94594_c0_g1,TRINITY_DN95777_c4_g2,TRINITY_DN96030_c0_g1,TRINITY_DN96139_c1_g1,TRI…
GO:0009501	amyloplast	cellular component	6/648	81/96716	1.9e-05	0.001896	TRINITY_DN82502_c0_g3,TRINITY_DN94345_c0_g1,TRINITY_DN96037_c1_g1,TRINITY_DN96704_c2_g2,TRINITY_DN96775_c3_g1,TRINITY_DN97884_c2_g3	TRINITY_DN82502_c0_g3,TRINITY_DN94345_c0_g1,TRINITY_DN96037_c1_g1,TRINITY_DN96704_c2_g2,TRINITY_DN96775_c3_g1,TRINITY_DN97884_c2_g3
GO:0005802	trans-Golgi network	cellular component	21/648	1088/96716	2.1e-05	0.00198628571428571	TRINITY_DN64594_c0_g1,TRINITY_DN71824_c1_g1,TRINITY_DN75706_c0_g2,TRINITY_DN76476_c0_g2,TRINITY_DN77169_c0_g2,TRINITY_DN81357_c0_g2,TRINITY_DN82314_c1_g2,TRINITY_DN82458_c1_g1,TRINITY_DN89487_c0_g3,TRINITY_DN90825_c1_g2,TRINITY_DN92233_c0_g2,TRINITY_DN92972_c1_g1,TRINITY_DN94077_c0_g1,TRINITY_DN96030_c0_g1,TRINITY_DN96502_c0_g2,TRINITY_DN96502_c0_g4,TRINITY_DN97602_c1_g1,TRINITY_DN97602_c1_g2,TRI…	TRINITY_DN64594_c0_g1,TRINITY_DN71824_c1_g1,TRINITY_DN75706_c0_g2,TRINITY_DN76476_c0_g2,TRINITY_DN77169_c0_g2,TRINITY_DN81357_c0_g2,TRINITY_DN82314_c1_g2,TRINITY_DN82458_c1_g1,TRINITY_DN89487_c0_g3,TRINITY_DN90825_c1_g2,TRINITY_DN92233_c0_g2,TRINITY_DN92972_c1_g1,TRINITY_DN94077_c0_g1,TRINITY_DN96030_c0_g1,TRINITY_DN96502_c0_g2,TRINITY_DN96502_c0_g4,TRINITY_DN97602_c1_g1,TRINITY_DN97602_c1_g2,TRI…
GO:0005875	microtubule associated complex	cellular component	12/648	402/96716	2.2e-05	0.00198628571428571	TRINITY_DN80494_c0_g1,TRINITY_DN82769_c1_g2,TRINITY_DN84678_c0_g1,TRINITY_DN85222_c1_g2,TRINITY_DN86674_c0_g3,TRINITY_DN90122_c0_g1,TRINITY_DN92330_c1_g2,TRINITY_DN96314_c1_g1,TRINITY_DN97225_c1_g1,TRINITY_DN97495_c2_g1,TRINITY_DN98212_c0_g1,TRINITY_DN98444_c1_g2	TRINITY_DN80494_c0_g1,TRINITY_DN82769_c1_g2,TRINITY_DN84678_c0_g1,TRINITY_DN85222_c1_g2,TRINITY_DN86674_c0_g3,TRINITY_DN90122_c0_g1,TRINITY_DN92330_c1_g2,TRINITY_DN96314_c1_g1,TRINITY_DN97225_c1_g1,TRINITY_DN97495_c2_g1,TRINITY_DN98212_c0_g1,TRINITY_DN98444_c1_g2
GO:0043971	histone H3-K18 acetylation	biological process	4/609	22/93642	1.2e-05	0.00199946341463415	TRINITY_DN96368_c1_g3,TRINITY_DN96797_c0_g4,TRINITY_DN97461_c0_g1,TRINITY_DN97461_c0_g2	TRINITY_DN96368_c1_g3,TRINITY_DN96797_c0_g4,TRINITY_DN97461_c0_g1,TRINITY_DN97461_c0_g2
GO:0043972	histone H3-K23 acetylation	biological process	4/609	22/93642	1.2e-05	0.00199946341463415	TRINITY_DN96368_c1_g3,TRINITY_DN96797_c0_g4,TRINITY_DN97461_c0_g1,TRINITY_DN97461_c0_g2	TRINITY_DN96368_c1_g3,TRINITY_DN96797_c0_g4,TRINITY_DN97461_c0_g1,TRINITY_DN97461_c0_g2
GO:0001101	response to acid chemical	biological process	39/609	2847/93642	1.4e-05	0.00230460240963855	TRINITY_DN71306_c1_g4,TRINITY_DN71958_c2_g1,TRINITY_DN72303_c0_g1,TRINITY_DN73130_c0_g1,TRINITY_DN73324_c3_g1,TRINITY_DN75228_c3_g1,TRINITY_DN75340_c0_g3,TRINITY_DN77049_c0_g3,TRINITY_DN78319_c0_g1,TRINITY_DN80750_c0_g3,TRINITY_DN81058_c1_g3,TRINITY_DN82502_c0_g1,TRINITY_DN82502_c0_g3,TRINITY_DN84335_c0_g1,TRINITY_DN85282_c1_g2,TRINITY_DN85750_c2_g1,TRINITY_DN85946_c2_g2,TRINITY_DN86079_c0_g1,TRI…	TRINITY_DN71306_c1_g4,TRINITY_DN71958_c2_g1,TRINITY_DN72303_c0_g1,TRINITY_DN73130_c0_g1,TRINITY_DN73324_c3_g1,TRINITY_DN75228_c3_g1,TRINITY_DN75340_c0_g3,TRINITY_DN77049_c0_g3,TRINITY_DN78319_c0_g1,TRINITY_DN80750_c0_g3,TRINITY_DN81058_c1_g3,TRINITY_DN82502_c0_g1,TRINITY_DN82502_c0_g3,TRINITY_DN84335_c0_g1,TRINITY_DN85282_c1_g2,TRINITY_DN85750_c2_g1,TRINITY_DN85946_c2_g2,TRINITY_DN86079_c0_g1,TRI…
GO:0035251	UDP-glucosyltransferase activity	molecular function	21/669	875/102170	5.3e-07	0.00244065	TRINITY_DN64594_c0_g1,TRINITY_DN69932_c0_g3,TRINITY_DN73173_c0_g2,TRINITY_DN73194_c1_g1,TRINITY_DN73944_c3_g3,TRINITY_DN77296_c1_g1,TRINITY_DN80965_c0_g4,TRINITY_DN81990_c0_g1,TRINITY_DN82458_c1_g1,TRINITY_DN86425_c1_g1,TRINITY_DN87084_c1_g4,TRINITY_DN89487_c0_g3,TRINITY_DN92140_c0_g6,TRINITY_DN95367_c0_g1,TRINITY_DN96584_c3_g4,TRINITY_DN96892_c2_g1,TRINITY_DN97121_c1_g1,TRINITY_DN97667_c3_g2,TRI…	TRINITY_DN64594_c0_g1,TRINITY_DN69932_c0_g3,TRINITY_DN73173_c0_g2,TRINITY_DN73194_c1_g1,TRINITY_DN73944_c3_g3,TRINITY_DN77296_c1_g1,TRINITY_DN80965_c0_g4,TRINITY_DN81990_c0_g1,TRINITY_DN82458_c1_g1,TRINITY_DN86425_c1_g1,TRINITY_DN87084_c1_g4,TRINITY_DN89487_c0_g3,TRINITY_DN92140_c0_g6,TRINITY_DN95367_c0_g1,TRINITY_DN96584_c3_g4,TRINITY_DN96892_c2_g1,TRINITY_DN97121_c1_g1,TRINITY_DN97667_c3_g2,TRI…
GO:0009574	preprophase band	cellular component	5/648	53/96716	2.9e-05	0.00249927272727273	TRINITY_DN73679_c1_g2,TRINITY_DN77234_c1_g2,TRINITY_DN79570_c1_g1,TRINITY_DN90376_c0_g3,TRINITY_DN98258_c0_g1	TRINITY_DN73679_c1_g2,TRINITY_DN77234_c1_g2,TRINITY_DN79570_c1_g1,TRINITY_DN90376_c0_g3,TRINITY_DN98258_c0_g1
GO:0009570	chloroplast stroma	cellular component	24/648	1386/96716	3.1e-05	0.00255547826086957	TRINITY_DN72688_c0_g2,TRINITY_DN74697_c0_g6,TRINITY_DN74712_c0_g1,TRINITY_DN75228_c3_g1,TRINITY_DN79475_c1_g2,TRINITY_DN81308_c1_g1,TRINITY_DN81660_c3_g2,TRINITY_DN82502_c0_g1,TRINITY_DN82502_c0_g3,TRINITY_DN82775_c4_g1,TRINITY_DN82963_c1_g4,TRINITY_DN83303_c2_g2,TRINITY_DN83719_c0_g4,TRINITY_DN86555_c0_g2,TRINITY_DN87125_c0_g3,TRINITY_DN91033_c2_g2,TRINITY_DN93209_c1_g1,TRINITY_DN93940_c0_g3,TRI…	TRINITY_DN72688_c0_g2,TRINITY_DN74697_c0_g6,TRINITY_DN74712_c0_g1,TRINITY_DN75228_c3_g1,TRINITY_DN79475_c1_g2,TRINITY_DN81308_c1_g1,TRINITY_DN81660_c3_g2,TRINITY_DN82502_c0_g1,TRINITY_DN82502_c0_g3,TRINITY_DN82775_c4_g1,TRINITY_DN82963_c1_g4,TRINITY_DN83303_c2_g2,TRINITY_DN83719_c0_g4,TRINITY_DN86555_c0_g2,TRINITY_DN87125_c0_g3,TRINITY_DN91033_c2_g2,TRINITY_DN93209_c1_g1,TRINITY_DN93940_c0_g3,TRI…
GO:0031050	dsRNA fragmentation	biological process	9/609	219/93642	1.6e-05	0.00257185882352941	TRINITY_DN70723_c1_g1,TRINITY_DN71889_c1_g1,TRINITY_DN72819_c0_g1,TRINITY_DN74503_c1_g2,TRINITY_DN84336_c1_g2,TRINITY_DN91297_c0_g1,TRINITY_DN95530_c0_g1,TRINITY_DN95775_c0_g1,TRINITY_DN97759_c1_g2	TRINITY_DN70723_c1_g1,TRINITY_DN71889_c1_g1,TRINITY_DN72819_c0_g1,TRINITY_DN74503_c1_g2,TRINITY_DN84336_c1_g2,TRINITY_DN91297_c0_g1,TRINITY_DN95530_c0_g1,TRINITY_DN95775_c0_g1,TRINITY_DN97759_c1_g2
GO:0070918	production of small RNA involved in gene silencing by RNA	biological process	9/609	219/93642	1.6e-05	0.00257185882352941	TRINITY_DN70723_c1_g1,TRINITY_DN71889_c1_g1,TRINITY_DN72819_c0_g1,TRINITY_DN74503_c1_g2,TRINITY_DN84336_c1_g2,TRINITY_DN91297_c0_g1,TRINITY_DN95530_c0_g1,TRINITY_DN95775_c0_g1,TRINITY_DN97759_c1_g2	TRINITY_DN70723_c1_g1,TRINITY_DN71889_c1_g1,TRINITY_DN72819_c0_g1,TRINITY_DN74503_c1_g2,TRINITY_DN84336_c1_g2,TRINITY_DN91297_c0_g1,TRINITY_DN95530_c0_g1,TRINITY_DN95775_c0_g1,TRINITY_DN97759_c1_g2
GO:0010015	root morphogenesis	biological process	14/609	547/93642	1.9e-05	0.00298387356321839	TRINITY_DN73679_c0_g1,TRINITY_DN75411_c0_g3,TRINITY_DN76045_c0_g1,TRINITY_DN81232_c0_g1,TRINITY_DN86210_c0_g1,TRINITY_DN87261_c0_g2,TRINITY_DN89685_c1_g2,TRINITY_DN92410_c0_g3,TRINITY_DN92972_c1_g1,TRINITY_DN93943_c0_g3,TRINITY_DN94649_c0_g3,TRINITY_DN96030_c0_g1,TRINITY_DN97471_c1_g1,TRINITY_DN97936_c1_g1	TRINITY_DN73679_c0_g1,TRINITY_DN75411_c0_g3,TRINITY_DN76045_c0_g1,TRINITY_DN81232_c0_g1,TRINITY_DN86210_c0_g1,TRINITY_DN87261_c0_g2,TRINITY_DN89685_c1_g2,TRINITY_DN92410_c0_g3,TRINITY_DN92972_c1_g1,TRINITY_DN93943_c0_g3,TRINITY_DN94649_c0_g3,TRINITY_DN96030_c0_g1,TRINITY_DN97471_c1_g1,TRINITY_DN97936_c1_g1
GO:0051274	beta-glucan biosynthetic process	biological process	13/609	477/93642	1.9e-05	0.00298387356321839	TRINITY_DN64594_c0_g1,TRINITY_DN73173_c0_g2,TRINITY_DN73944_c3_g3,TRINITY_DN77296_c1_g1,TRINITY_DN80965_c0_g4,TRINITY_DN82458_c1_g1,TRINITY_DN86425_c1_g1,TRINITY_DN89487_c0_g3,TRINITY_DN97121_c1_g1,TRINITY_DN97667_c3_g2,TRINITY_DN98392_c2_g1,TRINITY_DN98589_c2_g1,TRINITY_DN99026_c3_g1	TRINITY_DN64594_c0_g1,TRINITY_DN73173_c0_g2,TRINITY_DN73944_c3_g3,TRINITY_DN77296_c1_g1,TRINITY_DN80965_c0_g4,TRINITY_DN82458_c1_g1,TRINITY_DN86425_c1_g1,TRINITY_DN89487_c0_g3,TRINITY_DN97121_c1_g1,TRINITY_DN97667_c3_g2,TRINITY_DN98392_c2_g1,TRINITY_DN98589_c2_g1,TRINITY_DN99026_c3_g1
GO:0010629	negative regulation of gene expression	biological process	40/609	2995/93642	2.0e-05	0.00310522727272727	TRINITY_DN70421_c0_g1,TRINITY_DN70723_c1_g1,TRINITY_DN71424_c1_g2,TRINITY_DN71889_c1_g1,TRINITY_DN72819_c0_g1,TRINITY_DN73324_c3_g1,TRINITY_DN73444_c1_g3,TRINITY_DN73493_c1_g1,TRINITY_DN74503_c1_g2,TRINITY_DN74568_c0_g3,TRINITY_DN78805_c1_g1,TRINITY_DN80370_c4_g5,TRINITY_DN80794_c0_g1,TRINITY_DN83047_c1_g1,TRINITY_DN83048_c1_g1,TRINITY_DN84296_c1_g1,TRINITY_DN84336_c1_g2,TRINITY_DN84842_c1_g1,TRI…	TRINITY_DN70421_c0_g1,TRINITY_DN70723_c1_g1,TRINITY_DN71424_c1_g2,TRINITY_DN71889_c1_g1,TRINITY_DN72819_c0_g1,TRINITY_DN73324_c3_g1,TRINITY_DN73444_c1_g3,TRINITY_DN73493_c1_g1,TRINITY_DN74503_c1_g2,TRINITY_DN74568_c0_g3,TRINITY_DN78805_c1_g1,TRINITY_DN80370_c4_g5,TRINITY_DN80794_c0_g1,TRINITY_DN83047_c1_g1,TRINITY_DN83048_c1_g1,TRINITY_DN84296_c1_g1,TRINITY_DN84336_c1_g2,TRINITY_DN84842_c1_g1,TRI…
GO:0010223	secondary shoot formation	biological process	5/609	51/93642	2.1e-05	0.003153	TRINITY_DN74872_c1_g1,TRINITY_DN75121_c0_g4,TRINITY_DN83047_c1_g1,TRINITY_DN91545_c0_g4,TRINITY_DN95511_c3_g4	TRINITY_DN74872_c1_g1,TRINITY_DN75121_c0_g4,TRINITY_DN83047_c1_g1,TRINITY_DN91545_c0_g4,TRINITY_DN95511_c3_g4
GO:0010346	shoot axis formation	biological process	5/609	51/93642	2.1e-05	0.003153	TRINITY_DN74872_c1_g1,TRINITY_DN75121_c0_g4,TRINITY_DN83047_c1_g1,TRINITY_DN91545_c0_g4,TRINITY_DN95511_c3_g4	TRINITY_DN74872_c1_g1,TRINITY_DN75121_c0_g4,TRINITY_DN83047_c1_g1,TRINITY_DN91545_c0_g4,TRINITY_DN95511_c3_g4
GO:0048364	root development	biological process	22/609	1213/93642	2.1e-05	0.003153	TRINITY_DN73679_c0_g1,TRINITY_DN73679_c1_g2,TRINITY_DN75411_c0_g3,TRINITY_DN76045_c0_g1,TRINITY_DN78453_c0_g1,TRINITY_DN81232_c0_g1,TRINITY_DN86210_c0_g1,TRINITY_DN87261_c0_g2,TRINITY_DN88078_c1_g2,TRINITY_DN88748_c0_g4,TRINITY_DN89685_c1_g2,TRINITY_DN91758_c3_g4,TRINITY_DN92410_c0_g3,TRINITY_DN92972_c1_g1,TRINITY_DN93943_c0_g3,TRINITY_DN94649_c0_g3,TRINITY_DN94878_c0_g1,TRINITY_DN95123_c1_g2,TRI…	TRINITY_DN73679_c0_g1,TRINITY_DN73679_c1_g2,TRINITY_DN75411_c0_g3,TRINITY_DN76045_c0_g1,TRINITY_DN78453_c0_g1,TRINITY_DN81232_c0_g1,TRINITY_DN86210_c0_g1,TRINITY_DN87261_c0_g2,TRINITY_DN88078_c1_g2,TRINITY_DN88748_c0_g4,TRINITY_DN89685_c1_g2,TRINITY_DN91758_c3_g4,TRINITY_DN92410_c0_g3,TRINITY_DN92972_c1_g1,TRINITY_DN93943_c0_g3,TRINITY_DN94649_c0_g3,TRINITY_DN94878_c0_g1,TRINITY_DN95123_c1_g2,TRI…
GO:0051171	regulation of nitrogen compound metabolic process	biological process	108/609	11230/93642	2.2e-05	0.00323210752688172	TRINITY_DN66987_c0_g1,TRINITY_DN68255_c0_g1,TRINITY_DN70026_c1_g2,TRINITY_DN70487_c0_g1,TRINITY_DN70723_c1_g1,TRINITY_DN70831_c1_g2,TRINITY_DN71424_c1_g2,TRINITY_DN71554_c0_g1,TRINITY_DN71855_c4_g2,TRINITY_DN72303_c0_g1,TRINITY_DN72819_c0_g1,TRINITY_DN74568_c0_g3,TRINITY_DN75121_c0_g4,TRINITY_DN75231_c0_g1,TRINITY_DN76045_c0_g1,TRINITY_DN77126_c1_g2,TRINITY_DN77126_c1_g3,TRINITY_DN78801_c1_g1,TRI…	TRINITY_DN66987_c0_g1,TRINITY_DN68255_c0_g1,TRINITY_DN70026_c1_g2,TRINITY_DN70487_c0_g1,TRINITY_DN70723_c1_g1,TRINITY_DN70831_c1_g2,TRINITY_DN71424_c1_g2,TRINITY_DN71554_c0_g1,TRINITY_DN71855_c4_g2,TRINITY_DN72303_c0_g1,TRINITY_DN72819_c0_g1,TRINITY_DN74568_c0_g3,TRINITY_DN75121_c0_g4,TRINITY_DN75231_c0_g1,TRINITY_DN76045_c0_g1,TRINITY_DN77126_c1_g2,TRINITY_DN77126_c1_g3,TRINITY_DN78801_c1_g1,TRI…
GO:0080090	regulation of primary metabolic process	biological process	110/609	11491/93642	2.2e-05	0.00323210752688172	TRINITY_DN66987_c0_g1,TRINITY_DN68255_c0_g1,TRINITY_DN70026_c1_g2,TRINITY_DN70487_c0_g1,TRINITY_DN70723_c1_g1,TRINITY_DN70831_c1_g2,TRINITY_DN71424_c1_g2,TRINITY_DN71554_c0_g1,TRINITY_DN71855_c4_g2,TRINITY_DN72303_c0_g1,TRINITY_DN72819_c0_g1,TRINITY_DN74568_c0_g3,TRINITY_DN75121_c0_g4,TRINITY_DN76045_c0_g1,TRINITY_DN77126_c1_g2,TRINITY_DN77126_c1_g3,TRINITY_DN78319_c0_g1,TRINITY_DN78801_c1_g1,TRI…	TRINITY_DN66987_c0_g1,TRINITY_DN68255_c0_g1,TRINITY_DN70026_c1_g2,TRINITY_DN70487_c0_g1,TRINITY_DN70723_c1_g1,TRINITY_DN70831_c1_g2,TRINITY_DN71424_c1_g2,TRINITY_DN71554_c0_g1,TRINITY_DN71855_c4_g2,TRINITY_DN72303_c0_g1,TRINITY_DN72819_c0_g1,TRINITY_DN74568_c0_g3,TRINITY_DN75121_c0_g4,TRINITY_DN76045_c0_g1,TRINITY_DN77126_c1_g2,TRINITY_DN77126_c1_g3,TRINITY_DN78319_c0_g1,TRINITY_DN78801_c1_g1,TRI…
GO:0009532	plastid stroma	cellular component	24/648	1410/96716	4.1e-05	0.003239	TRINITY_DN72688_c0_g2,TRINITY_DN74697_c0_g6,TRINITY_DN74712_c0_g1,TRINITY_DN75228_c3_g1,TRINITY_DN79475_c1_g2,TRINITY_DN81308_c1_g1,TRINITY_DN81660_c3_g2,TRINITY_DN82502_c0_g1,TRINITY_DN82502_c0_g3,TRINITY_DN82775_c4_g1,TRINITY_DN82963_c1_g4,TRINITY_DN83303_c2_g2,TRINITY_DN83719_c0_g4,TRINITY_DN86555_c0_g2,TRINITY_DN87125_c0_g3,TRINITY_DN91033_c2_g2,TRINITY_DN93209_c1_g1,TRINITY_DN93940_c0_g3,TRI…	TRINITY_DN72688_c0_g2,TRINITY_DN74697_c0_g6,TRINITY_DN74712_c0_g1,TRINITY_DN75228_c3_g1,TRINITY_DN79475_c1_g2,TRINITY_DN81308_c1_g1,TRINITY_DN81660_c3_g2,TRINITY_DN82502_c0_g1,TRINITY_DN82502_c0_g3,TRINITY_DN82775_c4_g1,TRINITY_DN82963_c1_g4,TRINITY_DN83303_c2_g2,TRINITY_DN83719_c0_g4,TRINITY_DN86555_c0_g2,TRINITY_DN87125_c0_g3,TRINITY_DN91033_c2_g2,TRINITY_DN93209_c1_g1,TRINITY_DN93940_c0_g3,TRI…
GO:0044430	cytoskeletal part	cellular component	40/648	3009/96716	4.3e-05	0.00326112	TRINITY_DN71284_c1_g1,TRINITY_DN72905_c0_g4,TRINITY_DN73679_c0_g1,TRINITY_DN73679_c1_g2,TRINITY_DN74512_c3_g1,TRINITY_DN75496_c1_g1,TRINITY_DN77234_c1_g2,TRINITY_DN77469_c0_g1,TRINITY_DN78702_c1_g1,TRINITY_DN79570_c1_g1,TRINITY_DN79731_c0_g1,TRINITY_DN80494_c0_g1,TRINITY_DN80532_c2_g2,TRINITY_DN81644_c0_g1,TRINITY_DN82769_c1_g2,TRINITY_DN83889_c0_g2,TRINITY_DN84678_c0_g1,TRINITY_DN85222_c1_g2,TRI…	TRINITY_DN71284_c1_g1,TRINITY_DN72905_c0_g4,TRINITY_DN73679_c0_g1,TRINITY_DN73679_c1_g2,TRINITY_DN74512_c3_g1,TRINITY_DN75496_c1_g1,TRINITY_DN77234_c1_g2,TRINITY_DN77469_c0_g1,TRINITY_DN78702_c1_g1,TRINITY_DN79570_c1_g1,TRINITY_DN79731_c0_g1,TRINITY_DN80494_c0_g1,TRINITY_DN80532_c2_g2,TRINITY_DN81644_c0_g1,TRINITY_DN82769_c1_g2,TRINITY_DN83889_c0_g2,TRINITY_DN84678_c0_g1,TRINITY_DN85222_c1_g2,TRI…
GO:0046527	glucosyltransferase activity	molecular function	22/669	1022/102170	1.7e-06	0.00391425	TRINITY_DN64594_c0_g1,TRINITY_DN69932_c0_g3,TRINITY_DN73173_c0_g2,TRINITY_DN73194_c1_g1,TRINITY_DN73944_c3_g3,TRINITY_DN77296_c1_g1,TRINITY_DN80965_c0_g4,TRINITY_DN81990_c0_g1,TRINITY_DN82458_c1_g1,TRINITY_DN86425_c1_g1,TRINITY_DN87084_c1_g4,TRINITY_DN87713_c1_g2,TRINITY_DN89487_c0_g3,TRINITY_DN92140_c0_g6,TRINITY_DN95367_c0_g1,TRINITY_DN96584_c3_g4,TRINITY_DN96892_c2_g1,TRINITY_DN97121_c1_g1,TRI…	TRINITY_DN64594_c0_g1,TRINITY_DN69932_c0_g3,TRINITY_DN73173_c0_g2,TRINITY_DN73194_c1_g1,TRINITY_DN73944_c3_g3,TRINITY_DN77296_c1_g1,TRINITY_DN80965_c0_g4,TRINITY_DN81990_c0_g1,TRINITY_DN82458_c1_g1,TRINITY_DN86425_c1_g1,TRINITY_DN87084_c1_g4,TRINITY_DN87713_c1_g2,TRINITY_DN89487_c0_g3,TRINITY_DN92140_c0_g6,TRINITY_DN95367_c0_g1,TRINITY_DN96584_c3_g4,TRINITY_DN96892_c2_g1,TRINITY_DN97121_c1_g1,TRI…
GO:0016589	NURF complex	cellular component	4/648	31/96716	5.4e-05	0.00393784615384615	TRINITY_DN70725_c1_g7,TRINITY_DN93850_c1_g5,TRINITY_DN96369_c2_g1,TRINITY_DN96369_c2_g3	TRINITY_DN70725_c1_g7,TRINITY_DN93850_c1_g5,TRINITY_DN96369_c2_g1,TRINITY_DN96369_c2_g3
GO:0071359	cellular response to dsRNA	biological process	9/609	235/93642	2.8e-05	0.00406982978723404	TRINITY_DN70723_c1_g1,TRINITY_DN71889_c1_g1,TRINITY_DN72819_c0_g1,TRINITY_DN74503_c1_g2,TRINITY_DN84336_c1_g2,TRINITY_DN91297_c0_g1,TRINITY_DN95530_c0_g1,TRINITY_DN95775_c0_g1,TRINITY_DN97759_c1_g2	TRINITY_DN70723_c1_g1,TRINITY_DN71889_c1_g1,TRINITY_DN72819_c0_g1,TRINITY_DN74503_c1_g2,TRINITY_DN84336_c1_g2,TRINITY_DN91297_c0_g1,TRINITY_DN95530_c0_g1,TRINITY_DN95775_c0_g1,TRINITY_DN97759_c1_g2
GO:0071944	cell periphery	cellular component	167/648	18906/96716	6.4e-05	0.004108	TRINITY_DN64594_c0_g1,TRINITY_DN66768_c0_g1,TRINITY_DN67158_c0_g1,TRINITY_DN68079_c0_g2,TRINITY_DN68224_c1_g5,TRINITY_DN68838_c0_g1,TRINITY_DN69671_c1_g2,TRINITY_DN71042_c0_g1,TRINITY_DN71060_c0_g3,TRINITY_DN71143_c0_g1,TRINITY_DN71554_c0_g1,TRINITY_DN71824_c1_g1,TRINITY_DN71958_c2_g1,TRINITY_DN72745_c1_g1,TRINITY_DN72989_c0_g1,TRINITY_DN73104_c3_g1,TRINITY_DN73130_c0_g1,TRINITY_DN73145_c2_g1,TRI…	TRINITY_DN64594_c0_g1,TRINITY_DN66768_c0_g1,TRINITY_DN67158_c0_g1,TRINITY_DN68079_c0_g2,TRINITY_DN68224_c1_g5,TRINITY_DN68838_c0_g1,TRINITY_DN69671_c1_g2,TRINITY_DN71042_c0_g1,TRINITY_DN71060_c0_g3,TRINITY_DN71143_c0_g1,TRINITY_DN71554_c0_g1,TRINITY_DN71824_c1_g1,TRINITY_DN71958_c2_g1,TRINITY_DN72745_c1_g1,TRINITY_DN72989_c0_g1,TRINITY_DN73104_c3_g1,TRINITY_DN73130_c0_g1,TRINITY_DN73145_c2_g1,TRI…
GO:0005655	nucleolar ribonuclease P complex	cellular component	6/648	101/96716	6.5e-05	0.004108	TRINITY_DN70421_c0_g1,TRINITY_DN71889_c1_g1,TRINITY_DN73444_c1_g3,TRINITY_DN74503_c1_g2,TRINITY_DN80794_c0_g1,TRINITY_DN83048_c1_g1	TRINITY_DN70421_c0_g1,TRINITY_DN71889_c1_g1,TRINITY_DN73444_c1_g3,TRINITY_DN74503_c1_g2,TRINITY_DN80794_c0_g1,TRINITY_DN83048_c1_g1
GO:0030677	ribonuclease P complex	cellular component	6/648	101/96716	6.5e-05	0.004108	TRINITY_DN70421_c0_g1,TRINITY_DN71889_c1_g1,TRINITY_DN73444_c1_g3,TRINITY_DN74503_c1_g2,TRINITY_DN80794_c0_g1,TRINITY_DN83048_c1_g1	TRINITY_DN70421_c0_g1,TRINITY_DN71889_c1_g1,TRINITY_DN73444_c1_g3,TRINITY_DN74503_c1_g2,TRINITY_DN80794_c0_g1,TRINITY_DN83048_c1_g1
GO:0030681	multimeric ribonuclease P complex	cellular component	6/648	101/96716	6.5e-05	0.004108	TRINITY_DN70421_c0_g1,TRINITY_DN71889_c1_g1,TRINITY_DN73444_c1_g3,TRINITY_DN74503_c1_g2,TRINITY_DN80794_c0_g1,TRINITY_DN83048_c1_g1	TRINITY_DN70421_c0_g1,TRINITY_DN71889_c1_g1,TRINITY_DN73444_c1_g3,TRINITY_DN74503_c1_g2,TRINITY_DN80794_c0_g1,TRINITY_DN83048_c1_g1
GO:0031010	ISWI-type complex	cellular component	4/648	33/96716	7.0e-05	0.00428129032258064	TRINITY_DN70725_c1_g7,TRINITY_DN93850_c1_g5,TRINITY_DN96369_c2_g1,TRINITY_DN96369_c2_g3	TRINITY_DN70725_c1_g7,TRINITY_DN93850_c1_g5,TRINITY_DN96369_c2_g1,TRINITY_DN96369_c2_g3
GO:0043331	response to dsRNA	biological process	9/609	239/93642	3.1e-05	0.00445845263157895	TRINITY_DN70723_c1_g1,TRINITY_DN71889_c1_g1,TRINITY_DN72819_c0_g1,TRINITY_DN74503_c1_g2,TRINITY_DN84336_c1_g2,TRINITY_DN91297_c0_g1,TRINITY_DN95530_c0_g1,TRINITY_DN95775_c0_g1,TRINITY_DN97759_c1_g2	TRINITY_DN70723_c1_g1,TRINITY_DN71889_c1_g1,TRINITY_DN72819_c0_g1,TRINITY_DN74503_c1_g2,TRINITY_DN84336_c1_g2,TRINITY_DN91297_c0_g1,TRINITY_DN95530_c0_g1,TRINITY_DN95775_c0_g1,TRINITY_DN97759_c1_g2
GO:0009809	lignin biosynthetic process	biological process	8/609	186/93642	3.4e-05	0.00483897916666667	TRINITY_DN72604_c1_g1,TRINITY_DN77989_c3_g2,TRINITY_DN80907_c1_g1,TRINITY_DN81440_c1_g1,TRINITY_DN81857_c0_g1,TRINITY_DN81857_c0_g3,TRINITY_DN95201_c2_g4,TRINITY_DN98228_c0_g1	TRINITY_DN72604_c1_g1,TRINITY_DN77989_c3_g2,TRINITY_DN80907_c1_g1,TRINITY_DN81440_c1_g1,TRINITY_DN81857_c0_g1,TRINITY_DN81857_c0_g3,TRINITY_DN95201_c2_g4,TRINITY_DN98228_c0_g1
GO:0048511	rhythmic process	biological process	12/609	436/93642	3.6e-05	0.00507080412371134	TRINITY_DN81857_c0_g1,TRINITY_DN81857_c0_g3,TRINITY_DN84175_c3_g2,TRINITY_DN84523_c1_g1,TRINITY_DN86350_c0_g1,TRINITY_DN86350_c0_g2,TRINITY_DN87544_c1_g3,TRINITY_DN93239_c0_g2,TRINITY_DN93948_c1_g2,TRINITY_DN97143_c3_g2,TRINITY_DN97143_c3_g3,TRINITY_DN98228_c0_g1	TRINITY_DN81857_c0_g1,TRINITY_DN81857_c0_g3,TRINITY_DN84175_c3_g2,TRINITY_DN84523_c1_g1,TRINITY_DN86350_c0_g1,TRINITY_DN86350_c0_g2,TRINITY_DN87544_c1_g3,TRINITY_DN93239_c0_g2,TRINITY_DN93948_c1_g2,TRINITY_DN97143_c3_g2,TRINITY_DN97143_c3_g3,TRINITY_DN98228_c0_g1
GO:0019438	aromatic compound biosynthetic process	biological process	135/609	15010/93642	4.4e-05	0.00613440816326531	TRINITY_DN66987_c0_g1,TRINITY_DN68255_c0_g1,TRINITY_DN68532_c1_g1,TRINITY_DN70026_c1_g2,TRINITY_DN70156_c0_g5,TRINITY_DN70487_c0_g1,TRINITY_DN70831_c1_g2,TRINITY_DN71424_c1_g2,TRINITY_DN71554_c0_g1,TRINITY_DN71558_c1_g1,TRINITY_DN71855_c4_g2,TRINITY_DN72604_c1_g1,TRINITY_DN72819_c0_g1,TRINITY_DN74568_c0_g3,TRINITY_DN74697_c0_g6,TRINITY_DN76045_c0_g1,TRINITY_DN76917_c3_g1,TRINITY_DN77126_c1_g2,TRI…	TRINITY_DN66987_c0_g1,TRINITY_DN68255_c0_g1,TRINITY_DN68532_c1_g1,TRINITY_DN70026_c1_g2,TRINITY_DN70156_c0_g5,TRINITY_DN70487_c0_g1,TRINITY_DN70831_c1_g2,TRINITY_DN71424_c1_g2,TRINITY_DN71554_c0_g1,TRINITY_DN71558_c1_g1,TRINITY_DN71855_c4_g2,TRINITY_DN72604_c1_g1,TRINITY_DN72819_c0_g1,TRINITY_DN74568_c0_g3,TRINITY_DN74697_c0_g6,TRINITY_DN76045_c0_g1,TRINITY_DN76917_c3_g1,TRINITY_DN77126_c1_g2,TRI…
GO:0009250	glucan biosynthetic process	biological process	16/609	752/93642	4.5e-05	0.00621045454545455	TRINITY_DN64594_c0_g1,TRINITY_DN73173_c0_g2,TRINITY_DN73944_c3_g3,TRINITY_DN77296_c1_g1,TRINITY_DN80965_c0_g4,TRINITY_DN82458_c1_g1,TRINITY_DN86425_c1_g1,TRINITY_DN89487_c0_g3,TRINITY_DN94345_c0_g1,TRINITY_DN94349_c0_g2,TRINITY_DN96775_c3_g1,TRINITY_DN97121_c1_g1,TRINITY_DN97667_c3_g2,TRINITY_DN98392_c2_g1,TRINITY_DN98589_c2_g1,TRINITY_DN99026_c3_g1	TRINITY_DN64594_c0_g1,TRINITY_DN73173_c0_g2,TRINITY_DN73944_c3_g3,TRINITY_DN77296_c1_g1,TRINITY_DN80965_c0_g4,TRINITY_DN82458_c1_g1,TRINITY_DN86425_c1_g1,TRINITY_DN89487_c0_g3,TRINITY_DN94345_c0_g1,TRINITY_DN94349_c0_g2,TRINITY_DN96775_c3_g1,TRINITY_DN97121_c1_g1,TRINITY_DN97667_c3_g2,TRINITY_DN98392_c2_g1,TRINITY_DN98589_c2_g1,TRINITY_DN99026_c3_g1
GO:0016759	cellulose synthase activity	molecular function	8/669	148/102170	6.8e-06	0.006754	TRINITY_DN64594_c0_g1,TRINITY_DN73173_c0_g2,TRINITY_DN73944_c3_g3,TRINITY_DN80965_c0_g4,TRINITY_DN82458_c1_g1,TRINITY_DN89487_c0_g3,TRINITY_DN98589_c2_g1,TRINITY_DN99026_c3_g1	TRINITY_DN64594_c0_g1,TRINITY_DN73173_c0_g2,TRINITY_DN73944_c3_g3,TRINITY_DN80965_c0_g4,TRINITY_DN82458_c1_g1,TRINITY_DN89487_c0_g3,TRINITY_DN98589_c2_g1,TRINITY_DN99026_c3_g1
GO:0016760	cellulose synthase (UDP-forming) activity	molecular function	8/669	148/102170	6.8e-06	0.006754	TRINITY_DN64594_c0_g1,TRINITY_DN73173_c0_g2,TRINITY_DN73944_c3_g3,TRINITY_DN80965_c0_g4,TRINITY_DN82458_c1_g1,TRINITY_DN89487_c0_g3,TRINITY_DN98589_c2_g1,TRINITY_DN99026_c3_g1	TRINITY_DN64594_c0_g1,TRINITY_DN73173_c0_g2,TRINITY_DN73944_c3_g3,TRINITY_DN80965_c0_g4,TRINITY_DN82458_c1_g1,TRINITY_DN89487_c0_g3,TRINITY_DN98589_c2_g1,TRINITY_DN99026_c3_g1
GO:0016758	transferase activity, transferring hexosyl groups	molecular function	35/669	2353/102170	8.7e-06	0.006754	TRINITY_DN64594_c0_g1,TRINITY_DN69932_c0_g3,TRINITY_DN72745_c1_g1,TRINITY_DN73173_c0_g2,TRINITY_DN73194_c1_g1,TRINITY_DN73944_c3_g3,TRINITY_DN76353_c1_g1,TRINITY_DN77296_c1_g1,TRINITY_DN80965_c0_g4,TRINITY_DN81990_c0_g1,TRINITY_DN82458_c1_g1,TRINITY_DN82502_c0_g1,TRINITY_DN82502_c0_g3,TRINITY_DN86425_c1_g1,TRINITY_DN87084_c1_g4,TRINITY_DN87713_c1_g2,TRINITY_DN89487_c0_g3,TRINITY_DN91736_c1_g1,TRI…	TRINITY_DN64594_c0_g1,TRINITY_DN69932_c0_g3,TRINITY_DN72745_c1_g1,TRINITY_DN73173_c0_g2,TRINITY_DN73194_c1_g1,TRINITY_DN73944_c3_g3,TRINITY_DN76353_c1_g1,TRINITY_DN77296_c1_g1,TRINITY_DN80965_c0_g4,TRINITY_DN81990_c0_g1,TRINITY_DN82458_c1_g1,TRINITY_DN82502_c0_g1,TRINITY_DN82502_c0_g3,TRINITY_DN86425_c1_g1,TRINITY_DN87084_c1_g4,TRINITY_DN87713_c1_g2,TRINITY_DN89487_c0_g3,TRINITY_DN91736_c1_g1,TRI…
GO:0016740	transferase activity	molecular function	211/669	24702/102170	8.8e-06	0.006754	TRINITY_DN64594_c0_g1,TRINITY_DN65824_c0_g1,TRINITY_DN67266_c0_g1,TRINITY_DN68255_c0_g1,TRINITY_DN68749_c0_g1,TRINITY_DN68792_c0_g1,TRINITY_DN69399_c0_g2,TRINITY_DN69671_c1_g2,TRINITY_DN69932_c0_g3,TRINITY_DN70421_c0_g1,TRINITY_DN70805_c2_g2,TRINITY_DN70805_c2_g3,TRINITY_DN71291_c1_g1,TRINITY_DN71807_c0_g2,TRINITY_DN71855_c4_g2,TRINITY_DN72604_c1_g1,TRINITY_DN72666_c0_g1,TRINITY_DN72688_c0_g2,TRI…	TRINITY_DN64594_c0_g1,TRINITY_DN65824_c0_g1,TRINITY_DN67266_c0_g1,TRINITY_DN68255_c0_g1,TRINITY_DN68749_c0_g1,TRINITY_DN68792_c0_g1,TRINITY_DN69399_c0_g2,TRINITY_DN69671_c1_g2,TRINITY_DN69932_c0_g3,TRINITY_DN70421_c0_g1,TRINITY_DN70805_c2_g2,TRINITY_DN70805_c2_g3,TRINITY_DN71291_c1_g1,TRINITY_DN71807_c0_g2,TRINITY_DN71855_c4_g2,TRINITY_DN72604_c1_g1,TRINITY_DN72666_c0_g1,TRINITY_DN72688_c0_g2,TRI…
GO:0012505	endomembrane system	cellular component	128/648	13956/96716	0.00013	0.00746909090909091	TRINITY_DN64594_c0_g1,TRINITY_DN67158_c0_g1,TRINITY_DN68475_c0_g1,TRINITY_DN68475_c0_g3,TRINITY_DN68749_c0_g1,TRINITY_DN68792_c0_g1,TRINITY_DN69726_c2_g1,TRINITY_DN70487_c0_g1,TRINITY_DN70599_c1_g1,TRINITY_DN70599_c1_g3,TRINITY_DN71284_c1_g1,TRINITY_DN71306_c1_g4,TRINITY_DN71824_c1_g1,TRINITY_DN71889_c1_g1,TRINITY_DN71958_c2_g1,TRINITY_DN72442_c2_g3,TRINITY_DN72745_c1_g1,TRINITY_DN72866_c0_g3,TRI…	TRINITY_DN64594_c0_g1,TRINITY_DN67158_c0_g1,TRINITY_DN68475_c0_g1,TRINITY_DN68475_c0_g3,TRINITY_DN68749_c0_g1,TRINITY_DN68792_c0_g1,TRINITY_DN69726_c2_g1,TRINITY_DN70487_c0_g1,TRINITY_DN70599_c1_g1,TRINITY_DN70599_c1_g3,TRINITY_DN71284_c1_g1,TRINITY_DN71306_c1_g4,TRINITY_DN71824_c1_g1,TRINITY_DN71889_c1_g1,TRINITY_DN71958_c2_g1,TRINITY_DN72442_c2_g3,TRINITY_DN72745_c1_g1,TRINITY_DN72866_c0_g3,TRI…
GO:0031984	organelle subcompartment	cellular component	80/648	7851/96716	0.00013	0.00746909090909091	TRINITY_DN64594_c0_g1,TRINITY_DN67158_c0_g1,TRINITY_DN68475_c0_g1,TRINITY_DN68475_c0_g3,TRINITY_DN68749_c0_g1,TRINITY_DN70599_c1_g3,TRINITY_DN71824_c1_g1,TRINITY_DN71958_c2_g1,TRINITY_DN72745_c1_g1,TRINITY_DN72866_c0_g3,TRINITY_DN74697_c0_g6,TRINITY_DN74712_c0_g1,TRINITY_DN74996_c0_g1,TRINITY_DN75411_c0_g3,TRINITY_DN75496_c1_g1,TRINITY_DN75706_c0_g2,TRINITY_DN76476_c0_g2,TRINITY_DN77169_c0_g2,TRI…	TRINITY_DN64594_c0_g1,TRINITY_DN67158_c0_g1,TRINITY_DN68475_c0_g1,TRINITY_DN68475_c0_g3,TRINITY_DN68749_c0_g1,TRINITY_DN70599_c1_g3,TRINITY_DN71824_c1_g1,TRINITY_DN71958_c2_g1,TRINITY_DN72745_c1_g1,TRINITY_DN72866_c0_g3,TRINITY_DN74697_c0_g6,TRINITY_DN74712_c0_g1,TRINITY_DN74996_c0_g1,TRINITY_DN75411_c0_g3,TRINITY_DN75496_c1_g1,TRINITY_DN75706_c0_g2,TRINITY_DN76476_c0_g2,TRINITY_DN77169_c0_g2,TRI…
GO:0048519	negative regulation of biological process	biological process	68/609	6404/93642	5.5e-05	0.00751465	TRINITY_DN68434_c0_g1,TRINITY_DN69726_c2_g1,TRINITY_DN70421_c0_g1,TRINITY_DN70487_c0_g1,TRINITY_DN70723_c1_g1,TRINITY_DN71424_c1_g2,TRINITY_DN71889_c1_g1,TRINITY_DN72819_c0_g1,TRINITY_DN72905_c0_g4,TRINITY_DN73130_c0_g1,TRINITY_DN73324_c3_g1,TRINITY_DN73444_c1_g3,TRINITY_DN73493_c1_g1,TRINITY_DN74503_c1_g2,TRINITY_DN74568_c0_g3,TRINITY_DN75121_c0_g4,TRINITY_DN77469_c0_g1,TRINITY_DN78805_c1_g1,TRI…	TRINITY_DN68434_c0_g1,TRINITY_DN69726_c2_g1,TRINITY_DN70421_c0_g1,TRINITY_DN70487_c0_g1,TRINITY_DN70723_c1_g1,TRINITY_DN71424_c1_g2,TRINITY_DN71889_c1_g1,TRINITY_DN72819_c0_g1,TRINITY_DN72905_c0_g4,TRINITY_DN73130_c0_g1,TRINITY_DN73324_c3_g1,TRINITY_DN73444_c1_g3,TRINITY_DN73493_c1_g1,TRINITY_DN74503_c1_g2,TRINITY_DN74568_c0_g3,TRINITY_DN75121_c0_g4,TRINITY_DN77469_c0_g1,TRINITY_DN78805_c1_g1,TRI…
GO:0048438	floral whorl development	biological process	11/609	386/93642	5.6e-05	0.00757552475247525	TRINITY_DN73679_c0_g1,TRINITY_DN74096_c1_g1,TRINITY_DN75121_c0_g4,TRINITY_DN77469_c0_g4,TRINITY_DN82801_c0_g1,TRINITY_DN83719_c0_g4,TRINITY_DN85750_c2_g1,TRINITY_DN92488_c0_g1,TRINITY_DN94649_c0_g3,TRINITY_DN95710_c3_g2,TRINITY_DN97709_c0_g1	TRINITY_DN73679_c0_g1,TRINITY_DN74096_c1_g1,TRINITY_DN75121_c0_g4,TRINITY_DN77469_c0_g4,TRINITY_DN82801_c0_g1,TRINITY_DN83719_c0_g4,TRINITY_DN85750_c2_g1,TRINITY_DN92488_c0_g1,TRINITY_DN94649_c0_g3,TRINITY_DN95710_c3_g2,TRINITY_DN97709_c0_g1
GO:0071407	cellular response to organic cyclic compound	biological process	17/609	873/93642	7.8e-05	0.0104481764705882	TRINITY_DN70723_c1_g1,TRINITY_DN71889_c1_g1,TRINITY_DN72819_c0_g1,TRINITY_DN72989_c0_g1,TRINITY_DN73324_c3_g1,TRINITY_DN74503_c1_g2,TRINITY_DN74568_c0_g3,TRINITY_DN75228_c3_g1,TRINITY_DN77929_c0_g2,TRINITY_DN84336_c1_g2,TRINITY_DN85282_c1_g2,TRINITY_DN91297_c0_g1,TRINITY_DN93940_c0_g3,TRINITY_DN95530_c0_g1,TRINITY_DN95775_c0_g1,TRINITY_DN97759_c1_g2,TRINITY_DN99016_c7_g5	TRINITY_DN70723_c1_g1,TRINITY_DN71889_c1_g1,TRINITY_DN72819_c0_g1,TRINITY_DN72989_c0_g1,TRINITY_DN73324_c3_g1,TRINITY_DN74503_c1_g2,TRINITY_DN74568_c0_g3,TRINITY_DN75228_c3_g1,TRINITY_DN77929_c0_g2,TRINITY_DN84336_c1_g2,TRINITY_DN85282_c1_g2,TRINITY_DN91297_c0_g1,TRINITY_DN93940_c0_g3,TRINITY_DN95530_c0_g1,TRINITY_DN95775_c0_g1,TRINITY_DN97759_c1_g2,TRINITY_DN99016_c7_g5
GO:0098542	defense response to other organism	biological process	31/609	2225/93642	8.0e-05	0.0105400285714286	TRINITY_DN71424_c1_g2,TRINITY_DN71558_c1_g1,TRINITY_DN71889_c1_g1,TRINITY_DN73324_c3_g1,TRINITY_DN73444_c1_g3,TRINITY_DN74503_c1_g2,TRINITY_DN75228_c3_g1,TRINITY_DN78453_c0_g1,TRINITY_DN81259_c0_g1,TRINITY_DN82801_c0_g1,TRINITY_DN83048_c1_g1,TRINITY_DN84469_c1_g1,TRINITY_DN85213_c0_g1,TRINITY_DN86210_c0_g1,TRINITY_DN86350_c0_g1,TRINITY_DN86350_c0_g2,TRINITY_DN87533_c3_g4,TRINITY_DN90512_c0_g2,TRI…	TRINITY_DN71424_c1_g2,TRINITY_DN71558_c1_g1,TRINITY_DN71889_c1_g1,TRINITY_DN73324_c3_g1,TRINITY_DN73444_c1_g3,TRINITY_DN74503_c1_g2,TRINITY_DN75228_c3_g1,TRINITY_DN78453_c0_g1,TRINITY_DN81259_c0_g1,TRINITY_DN82801_c0_g1,TRINITY_DN83048_c1_g1,TRINITY_DN84469_c1_g1,TRINITY_DN85213_c0_g1,TRINITY_DN86210_c0_g1,TRINITY_DN86350_c0_g1,TRINITY_DN86350_c0_g2,TRINITY_DN87533_c3_g4,TRINITY_DN90512_c0_g2,TRI…
GO:0021700	developmental maturation	biological process	13/609	550/93642	8.1e-05	0.0105400285714286	TRINITY_DN73679_c0_g1,TRINITY_DN75340_c0_g2,TRINITY_DN75340_c0_g3,TRINITY_DN77469_c0_g4,TRINITY_DN82761_c1_g1,TRINITY_DN85282_c1_g2,TRINITY_DN90685_c2_g1,TRINITY_DN92690_c1_g1,TRINITY_DN92972_c1_g1,TRINITY_DN94649_c0_g3,TRINITY_DN96030_c0_g1,TRINITY_DN97471_c1_g1,TRINITY_DN97936_c1_g1	TRINITY_DN73679_c0_g1,TRINITY_DN75340_c0_g2,TRINITY_DN75340_c0_g3,TRINITY_DN77469_c0_g4,TRINITY_DN82761_c1_g1,TRINITY_DN85282_c1_g2,TRINITY_DN90685_c2_g1,TRINITY_DN92690_c1_g1,TRINITY_DN92972_c1_g1,TRINITY_DN94649_c0_g3,TRINITY_DN96030_c0_g1,TRINITY_DN97471_c1_g1,TRINITY_DN97936_c1_g1
GO:0010035	response to inorganic substance	biological process	39/609	3087/93642	8.1e-05	0.0105400285714286	TRINITY_DN63286_c0_g1,TRINITY_DN67158_c0_g1,TRINITY_DN70911_c2_g1,TRINITY_DN72281_c0_g1,TRINITY_DN73130_c0_g1,TRINITY_DN73374_c1_g2,TRINITY_DN75619_c0_g1,TRINITY_DN75761_c2_g1,TRINITY_DN77049_c0_g3,TRINITY_DN78240_c2_g4,TRINITY_DN81058_c1_g3,TRINITY_DN81308_c1_g1,TRINITY_DN81660_c3_g2,TRINITY_DN82502_c0_g1,TRINITY_DN82502_c0_g3,TRINITY_DN82801_c0_g1,TRINITY_DN84523_c1_g1,TRINITY_DN85946_c2_g2,TRI…	TRINITY_DN63286_c0_g1,TRINITY_DN67158_c0_g1,TRINITY_DN70911_c2_g1,TRINITY_DN72281_c0_g1,TRINITY_DN73130_c0_g1,TRINITY_DN73374_c1_g2,TRINITY_DN75619_c0_g1,TRINITY_DN75761_c2_g1,TRINITY_DN77049_c0_g3,TRINITY_DN78240_c2_g4,TRINITY_DN81058_c1_g3,TRINITY_DN81308_c1_g1,TRINITY_DN81660_c3_g2,TRINITY_DN82502_c0_g1,TRINITY_DN82502_c0_g3,TRINITY_DN82801_c0_g1,TRINITY_DN84523_c1_g1,TRINITY_DN85946_c2_g2,TRI…
GO:0003002	regionalization	biological process	13/609	551/93642	8.3e-05	0.0106983867924528	TRINITY_DN68079_c0_g2,TRINITY_DN70156_c0_g5,TRINITY_DN70487_c0_g1,TRINITY_DN71554_c0_g1,TRINITY_DN77929_c0_g2,TRINITY_DN80884_c0_g1,TRINITY_DN88078_c1_g2,TRINITY_DN92488_c0_g1,TRINITY_DN93850_c1_g5,TRINITY_DN94172_c0_g1,TRINITY_DN97262_c0_g2,TRINITY_DN98212_c0_g1,TRINITY_DN98453_c1_g1	TRINITY_DN68079_c0_g2,TRINITY_DN70156_c0_g5,TRINITY_DN70487_c0_g1,TRINITY_DN71554_c0_g1,TRINITY_DN77929_c0_g2,TRINITY_DN80884_c0_g1,TRINITY_DN88078_c1_g2,TRINITY_DN92488_c0_g1,TRINITY_DN93850_c1_g5,TRINITY_DN94172_c0_g1,TRINITY_DN97262_c0_g2,TRINITY_DN98212_c0_g1,TRINITY_DN98453_c1_g1
GO:0007389	pattern specification process	biological process	14/609	632/93642	8.7e-05	0.0110063055555556	TRINITY_DN68079_c0_g2,TRINITY_DN70156_c0_g5,TRINITY_DN70487_c0_g1,TRINITY_DN71554_c0_g1,TRINITY_DN77929_c0_g2,TRINITY_DN80884_c0_g1,TRINITY_DN88078_c1_g2,TRINITY_DN92488_c0_g1,TRINITY_DN93850_c1_g5,TRINITY_DN94172_c0_g1,TRINITY_DN96030_c0_g1,TRINITY_DN97262_c0_g2,TRINITY_DN98212_c0_g1,TRINITY_DN98453_c1_g1	TRINITY_DN68079_c0_g2,TRINITY_DN70156_c0_g5,TRINITY_DN70487_c0_g1,TRINITY_DN71554_c0_g1,TRINITY_DN77929_c0_g2,TRINITY_DN80884_c0_g1,TRINITY_DN88078_c1_g2,TRINITY_DN92488_c0_g1,TRINITY_DN93850_c1_g5,TRINITY_DN94172_c0_g1,TRINITY_DN96030_c0_g1,TRINITY_DN97262_c0_g2,TRINITY_DN98212_c0_g1,TRINITY_DN98453_c1_g1
GO:0009409	response to cold	biological process	15/609	713/93642	8.7e-05	0.0110063055555556	TRINITY_DN70626_c0_g2,TRINITY_DN71558_c1_g1,TRINITY_DN73363_c2_g1,TRINITY_DN79849_c1_g1,TRINITY_DN81857_c0_g1,TRINITY_DN81857_c0_g3,TRINITY_DN82775_c4_g1,TRINITY_DN84175_c3_g2,TRINITY_DN84523_c1_g1,TRINITY_DN87544_c1_g3,TRINITY_DN91644_c0_g1,TRINITY_DN93239_c0_g2,TRINITY_DN94999_c0_g1,TRINITY_DN98228_c0_g1,TRINITY_DN99016_c7_g5	TRINITY_DN70626_c0_g2,TRINITY_DN71558_c1_g1,TRINITY_DN73363_c2_g1,TRINITY_DN79849_c1_g1,TRINITY_DN81857_c0_g1,TRINITY_DN81857_c0_g3,TRINITY_DN82775_c4_g1,TRINITY_DN84175_c3_g2,TRINITY_DN84523_c1_g1,TRINITY_DN87544_c1_g3,TRINITY_DN91644_c0_g1,TRINITY_DN93239_c0_g2,TRINITY_DN94999_c0_g1,TRINITY_DN98228_c0_g1,TRINITY_DN99016_c7_g5
GO:0030244	cellulose biosynthetic process	biological process	8/609	214/93642	9.1e-05	0.0114067247706422	TRINITY_DN64594_c0_g1,TRINITY_DN73173_c0_g2,TRINITY_DN73944_c3_g3,TRINITY_DN80965_c0_g4,TRINITY_DN82458_c1_g1,TRINITY_DN89487_c0_g3,TRINITY_DN98589_c2_g1,TRINITY_DN99026_c3_g1	TRINITY_DN64594_c0_g1,TRINITY_DN73173_c0_g2,TRINITY_DN73944_c3_g3,TRINITY_DN80965_c0_g4,TRINITY_DN82458_c1_g1,TRINITY_DN89487_c0_g3,TRINITY_DN98589_c2_g1,TRINITY_DN99026_c3_g1
GO:0033692	cellular polysaccharide biosynthetic process	biological process	19/609	1064/93642	9.4e-05	0.0115704684684685	TRINITY_DN64594_c0_g1,TRINITY_DN73173_c0_g2,TRINITY_DN73944_c3_g3,TRINITY_DN77296_c1_g1,TRINITY_DN80965_c0_g4,TRINITY_DN82458_c1_g1,TRINITY_DN86425_c1_g1,TRINITY_DN89487_c0_g3,TRINITY_DN91323_c1_g5,TRINITY_DN91736_c1_g1,TRINITY_DN94345_c0_g1,TRINITY_DN94349_c0_g2,TRINITY_DN96216_c0_g1,TRINITY_DN96775_c3_g1,TRINITY_DN97121_c1_g1,TRINITY_DN97667_c3_g2,TRINITY_DN98392_c2_g1,TRINITY_DN98589_c2_g1,TRI…	TRINITY_DN64594_c0_g1,TRINITY_DN73173_c0_g2,TRINITY_DN73944_c3_g3,TRINITY_DN77296_c1_g1,TRINITY_DN80965_c0_g4,TRINITY_DN82458_c1_g1,TRINITY_DN86425_c1_g1,TRINITY_DN89487_c0_g3,TRINITY_DN91323_c1_g5,TRINITY_DN91736_c1_g1,TRINITY_DN94345_c0_g1,TRINITY_DN94349_c0_g2,TRINITY_DN96216_c0_g1,TRINITY_DN96775_c3_g1,TRINITY_DN97121_c1_g1,TRINITY_DN97667_c3_g2,TRINITY_DN98392_c2_g1,TRINITY_DN98589_c2_g1,TRI…
GO:0009637	response to blue light	biological process	7/609	160/93642	9.4e-05	0.0115704684684685	TRINITY_DN74096_c1_g1,TRINITY_DN84523_c1_g1,TRINITY_DN87544_c1_g3,TRINITY_DN90997_c1_g1,TRINITY_DN91033_c2_g2,TRINITY_DN95710_c3_g2,TRINITY_DN98591_c5_g2	TRINITY_DN74096_c1_g1,TRINITY_DN84523_c1_g1,TRINITY_DN87544_c1_g3,TRINITY_DN90997_c1_g1,TRINITY_DN91033_c2_g2,TRINITY_DN95710_c3_g2,TRINITY_DN98591_c5_g2
GO:0003968	RNA-directed 5'-3' RNA polymerase activity	molecular function	6/669	84/102170	2.0e-05	0.012088125	TRINITY_DN73493_c1_g1,TRINITY_DN78805_c1_g1,TRINITY_DN84296_c1_g1,TRINITY_DN88508_c2_g1,TRINITY_DN95530_c0_g1,TRINITY_DN98764_c5_g3	TRINITY_DN73493_c1_g1,TRINITY_DN78805_c1_g1,TRINITY_DN84296_c1_g1,TRINITY_DN88508_c2_g1,TRINITY_DN95530_c0_g1,TRINITY_DN98764_c5_g3
GO:0016757	transferase activity, transferring glycosyl groups	molecular function	41/669	3086/102170	2.1e-05	0.012088125	TRINITY_DN64594_c0_g1,TRINITY_DN69932_c0_g3,TRINITY_DN72745_c1_g1,TRINITY_DN73173_c0_g2,TRINITY_DN73194_c1_g1,TRINITY_DN73944_c3_g3,TRINITY_DN76353_c1_g1,TRINITY_DN77296_c1_g1,TRINITY_DN79850_c0_g6,TRINITY_DN80781_c0_g5,TRINITY_DN80965_c0_g4,TRINITY_DN81990_c0_g1,TRINITY_DN82458_c1_g1,TRINITY_DN82502_c0_g1,TRINITY_DN82502_c0_g3,TRINITY_DN85961_c0_g2,TRINITY_DN86425_c1_g1,TRINITY_DN87084_c1_g4,TRI…	TRINITY_DN64594_c0_g1,TRINITY_DN69932_c0_g3,TRINITY_DN72745_c1_g1,TRINITY_DN73173_c0_g2,TRINITY_DN73194_c1_g1,TRINITY_DN73944_c3_g3,TRINITY_DN76353_c1_g1,TRINITY_DN77296_c1_g1,TRINITY_DN79850_c0_g6,TRINITY_DN80781_c0_g5,TRINITY_DN80965_c0_g4,TRINITY_DN81990_c0_g1,TRINITY_DN82458_c1_g1,TRINITY_DN82502_c0_g1,TRINITY_DN82502_c0_g3,TRINITY_DN85961_c0_g2,TRINITY_DN86425_c1_g1,TRINITY_DN87084_c1_g4,TRI…
GO:0010051	xylem and phloem pattern formation	biological process	8/609	218/93642	0.00010	0.0121991071428571	TRINITY_DN68079_c0_g2,TRINITY_DN70156_c0_g5,TRINITY_DN71554_c0_g1,TRINITY_DN77929_c0_g2,TRINITY_DN80884_c0_g1,TRINITY_DN94172_c0_g1,TRINITY_DN97262_c0_g2,TRINITY_DN98453_c1_g1	TRINITY_DN68079_c0_g2,TRINITY_DN70156_c0_g5,TRINITY_DN71554_c0_g1,TRINITY_DN77929_c0_g2,TRINITY_DN80884_c0_g1,TRINITY_DN94172_c0_g1,TRINITY_DN97262_c0_g2,TRINITY_DN98453_c1_g1
GO:0005856	cytoskeleton	cellular component	44/648	3714/96716	0.00024	0.0130011428571429	TRINITY_DN71284_c1_g1,TRINITY_DN72905_c0_g4,TRINITY_DN73179_c2_g2,TRINITY_DN73679_c0_g1,TRINITY_DN73679_c1_g2,TRINITY_DN74512_c3_g1,TRINITY_DN75496_c1_g1,TRINITY_DN77234_c1_g2,TRINITY_DN77433_c0_g1,TRINITY_DN77469_c0_g1,TRINITY_DN78702_c1_g1,TRINITY_DN79570_c1_g1,TRINITY_DN79731_c0_g1,TRINITY_DN80494_c0_g1,TRINITY_DN80532_c2_g2,TRINITY_DN81644_c0_g1,TRINITY_DN82769_c1_g2,TRINITY_DN83889_c0_g2,TRI…	TRINITY_DN71284_c1_g1,TRINITY_DN72905_c0_g4,TRINITY_DN73179_c2_g2,TRINITY_DN73679_c0_g1,TRINITY_DN73679_c1_g2,TRINITY_DN74512_c3_g1,TRINITY_DN75496_c1_g1,TRINITY_DN77234_c1_g2,TRINITY_DN77433_c0_g1,TRINITY_DN77469_c0_g1,TRINITY_DN78702_c1_g1,TRINITY_DN79570_c1_g1,TRINITY_DN79731_c0_g1,TRINITY_DN80494_c0_g1,TRINITY_DN80532_c2_g2,TRINITY_DN81644_c0_g1,TRINITY_DN82769_c1_g2,TRINITY_DN83889_c0_g2,TRI…
GO:1902555	endoribonuclease complex	cellular component	6/648	128/96716	0.00024	0.0130011428571429	TRINITY_DN70421_c0_g1,TRINITY_DN71889_c1_g1,TRINITY_DN73444_c1_g3,TRINITY_DN74503_c1_g2,TRINITY_DN80794_c0_g1,TRINITY_DN83048_c1_g1	TRINITY_DN70421_c0_g1,TRINITY_DN71889_c1_g1,TRINITY_DN73444_c1_g3,TRINITY_DN74503_c1_g2,TRINITY_DN80794_c0_g1,TRINITY_DN83048_c1_g1
GO:0040029	regulation of gene expression, epigenetic	biological process	18/609	986/93642	0.00011	0.0130689565217391	TRINITY_DN70723_c1_g1,TRINITY_DN71889_c1_g1,TRINITY_DN72819_c0_g1,TRINITY_DN74503_c1_g2,TRINITY_DN75121_c0_g4,TRINITY_DN83047_c1_g1,TRINITY_DN84336_c1_g2,TRINITY_DN89410_c0_g2,TRINITY_DN91297_c0_g1,TRINITY_DN91545_c0_g4,TRINITY_DN91784_c1_g1,TRINITY_DN93339_c1_g1,TRINITY_DN94594_c0_g1,TRINITY_DN95530_c0_g1,TRINITY_DN95775_c0_g1,TRINITY_DN96581_c2_g1,TRINITY_DN97759_c1_g2,TRINITY_DN97970_c2_g1	TRINITY_DN70723_c1_g1,TRINITY_DN71889_c1_g1,TRINITY_DN72819_c0_g1,TRINITY_DN74503_c1_g2,TRINITY_DN75121_c0_g4,TRINITY_DN83047_c1_g1,TRINITY_DN84336_c1_g2,TRINITY_DN89410_c0_g2,TRINITY_DN91297_c0_g1,TRINITY_DN91545_c0_g4,TRINITY_DN91784_c1_g1,TRINITY_DN93339_c1_g1,TRINITY_DN94594_c0_g1,TRINITY_DN95530_c0_g1,TRINITY_DN95775_c0_g1,TRINITY_DN96581_c2_g1,TRINITY_DN97759_c1_g2,TRINITY_DN97970_c2_g1
GO:0009630	gravitropism	biological process	7/609	164/93642	0.00011	0.0130689565217391	TRINITY_DN74096_c1_g1,TRINITY_DN74996_c0_g1,TRINITY_DN86517_c1_g1,TRINITY_DN95710_c3_g2,TRINITY_DN97626_c2_g1,TRINITY_DN97936_c1_g1,TRINITY_DN98591_c5_g2	TRINITY_DN74096_c1_g1,TRINITY_DN74996_c0_g1,TRINITY_DN86517_c1_g1,TRINITY_DN95710_c3_g2,TRINITY_DN97626_c2_g1,TRINITY_DN97936_c1_g1,TRINITY_DN98591_c5_g2
GO:0044154	histone H3-K14 acetylation	biological process	4/609	38/93642	0.00011	0.0130689565217391	TRINITY_DN96368_c1_g3,TRINITY_DN96797_c0_g4,TRINITY_DN97461_c0_g1,TRINITY_DN97461_c0_g2	TRINITY_DN96368_c1_g3,TRINITY_DN96797_c0_g4,TRINITY_DN97461_c0_g1,TRINITY_DN97461_c0_g2
GO:0009606	tropism	biological process	8/609	222/93642	0.00012	0.0140133333333333	TRINITY_DN74096_c1_g1,TRINITY_DN74996_c0_g1,TRINITY_DN86517_c1_g1,TRINITY_DN95710_c3_g2,TRINITY_DN96030_c0_g1,TRINITY_DN97626_c2_g1,TRINITY_DN97936_c1_g1,TRINITY_DN98591_c5_g2	TRINITY_DN74096_c1_g1,TRINITY_DN74996_c0_g1,TRINITY_DN86517_c1_g1,TRINITY_DN95710_c3_g2,TRINITY_DN96030_c0_g1,TRINITY_DN97626_c2_g1,TRINITY_DN97936_c1_g1,TRINITY_DN98591_c5_g2
GO:0010964	regulation of chromatin silencing by small RNA	biological process	3/609	15/93642	0.00012	0.0140133333333333	TRINITY_DN72819_c0_g1,TRINITY_DN91784_c1_g1,TRINITY_DN95775_c0_g1	TRINITY_DN72819_c0_g1,TRINITY_DN91784_c1_g1,TRINITY_DN95775_c0_g1
GO:0043231	intracellular membrane-bounded organelle	cellular component	422/648	56518/96716	0.00028	0.0147466666666667	TRINITY_DN64594_c0_g1,TRINITY_DN65824_c0_g1,TRINITY_DN67158_c0_g1,TRINITY_DN68255_c0_g1,TRINITY_DN68434_c0_g1,TRINITY_DN68475_c0_g1,TRINITY_DN68475_c0_g3,TRINITY_DN68532_c1_g1,TRINITY_DN68749_c0_g1,TRINITY_DN68792_c0_g1,TRINITY_DN69266_c1_g1,TRINITY_DN69571_c1_g1,TRINITY_DN69726_c2_g1,TRINITY_DN69932_c0_g3,TRINITY_DN70026_c1_g2,TRINITY_DN70156_c0_g5,TRINITY_DN70421_c0_g1,TRINITY_DN70487_c0_g1,TRI…	TRINITY_DN64594_c0_g1,TRINITY_DN65824_c0_g1,TRINITY_DN67158_c0_g1,TRINITY_DN68255_c0_g1,TRINITY_DN68434_c0_g1,TRINITY_DN68475_c0_g1,TRINITY_DN68475_c0_g3,TRINITY_DN68532_c1_g1,TRINITY_DN68749_c0_g1,TRINITY_DN68792_c0_g1,TRINITY_DN69266_c1_g1,TRINITY_DN69571_c1_g1,TRINITY_DN69726_c2_g1,TRINITY_DN69932_c0_g3,TRINITY_DN70026_c1_g2,TRINITY_DN70156_c0_g5,TRINITY_DN70421_c0_g1,TRINITY_DN70487_c0_g1,TRI…
GO:0048580	regulation of post-embryonic development	biological process	15/609	741/93642	0.00013	0.0150524576271186	TRINITY_DN68255_c0_g1,TRINITY_DN75121_c0_g4,TRINITY_DN78319_c0_g1,TRINITY_DN82801_c0_g1,TRINITY_DN84175_c3_g2,TRINITY_DN84523_c1_g1,TRINITY_DN85282_c1_g2,TRINITY_DN86210_c0_g1,TRINITY_DN87544_c1_g3,TRINITY_DN89102_c1_g1,TRINITY_DN93239_c0_g2,TRINITY_DN93943_c0_g3,TRINITY_DN94594_c0_g1,TRINITY_DN95125_c2_g1,TRINITY_DN98362_c5_g2	TRINITY_DN68255_c0_g1,TRINITY_DN75121_c0_g4,TRINITY_DN78319_c0_g1,TRINITY_DN82801_c0_g1,TRINITY_DN84175_c3_g2,TRINITY_DN84523_c1_g1,TRINITY_DN85282_c1_g2,TRINITY_DN86210_c0_g1,TRINITY_DN87544_c1_g3,TRINITY_DN89102_c1_g1,TRINITY_DN93239_c0_g2,TRINITY_DN93943_c0_g3,TRINITY_DN94594_c0_g1,TRINITY_DN95125_c2_g1,TRINITY_DN98362_c5_g2
GO:1905348	endonuclease complex	cellular component	6/648	134/96716	0.00031	0.0158854054054054	TRINITY_DN70421_c0_g1,TRINITY_DN71889_c1_g1,TRINITY_DN73444_c1_g3,TRINITY_DN74503_c1_g2,TRINITY_DN80794_c0_g1,TRINITY_DN83048_c1_g1	TRINITY_DN70421_c0_g1,TRINITY_DN71889_c1_g1,TRINITY_DN73444_c1_g3,TRINITY_DN74503_c1_g2,TRINITY_DN80794_c0_g1,TRINITY_DN83048_c1_g1
GO:0070919	production of siRNA involved in chromatin silencing by small RNA	biological process	3/609	16/93642	0.00014	0.0160741176470588	TRINITY_DN72819_c0_g1,TRINITY_DN95530_c0_g1,TRINITY_DN95775_c0_g1	TRINITY_DN72819_c0_g1,TRINITY_DN95530_c0_g1,TRINITY_DN95775_c0_g1
GO:0043226	organelle	cellular component	459/648	62359/96716	0.00034	0.0165292307692308	TRINITY_DN64594_c0_g1,TRINITY_DN65824_c0_g1,TRINITY_DN67158_c0_g1,TRINITY_DN68255_c0_g1,TRINITY_DN68434_c0_g1,TRINITY_DN68475_c0_g1,TRINITY_DN68475_c0_g3,TRINITY_DN68532_c1_g1,TRINITY_DN68749_c0_g1,TRINITY_DN68792_c0_g1,TRINITY_DN69266_c1_g1,TRINITY_DN69571_c1_g1,TRINITY_DN69726_c2_g1,TRINITY_DN69932_c0_g3,TRINITY_DN70026_c1_g2,TRINITY_DN70156_c0_g5,TRINITY_DN70421_c0_g1,TRINITY_DN70487_c0_g1,TRI…	TRINITY_DN64594_c0_g1,TRINITY_DN65824_c0_g1,TRINITY_DN67158_c0_g1,TRINITY_DN68255_c0_g1,TRINITY_DN68434_c0_g1,TRINITY_DN68475_c0_g1,TRINITY_DN68475_c0_g3,TRINITY_DN68532_c1_g1,TRINITY_DN68749_c0_g1,TRINITY_DN68792_c0_g1,TRINITY_DN69266_c1_g1,TRINITY_DN69571_c1_g1,TRINITY_DN69726_c2_g1,TRINITY_DN69932_c0_g3,TRINITY_DN70026_c1_g2,TRINITY_DN70156_c0_g5,TRINITY_DN70421_c0_g1,TRINITY_DN70487_c0_g1,TRI…
GO:0043227	membrane-bounded organelle	cellular component	430/648	57861/96716	0.00034	0.0165292307692308	TRINITY_DN64594_c0_g1,TRINITY_DN65824_c0_g1,TRINITY_DN67158_c0_g1,TRINITY_DN68255_c0_g1,TRINITY_DN68434_c0_g1,TRINITY_DN68475_c0_g1,TRINITY_DN68475_c0_g3,TRINITY_DN68532_c1_g1,TRINITY_DN68749_c0_g1,TRINITY_DN68792_c0_g1,TRINITY_DN69266_c1_g1,TRINITY_DN69571_c1_g1,TRINITY_DN69726_c2_g1,TRINITY_DN69932_c0_g3,TRINITY_DN70026_c1_g2,TRINITY_DN70156_c0_g5,TRINITY_DN70421_c0_g1,TRINITY_DN70487_c0_g1,TRI…	TRINITY_DN64594_c0_g1,TRINITY_DN65824_c0_g1,TRINITY_DN67158_c0_g1,TRINITY_DN68255_c0_g1,TRINITY_DN68434_c0_g1,TRINITY_DN68475_c0_g1,TRINITY_DN68475_c0_g3,TRINITY_DN68532_c1_g1,TRINITY_DN68749_c0_g1,TRINITY_DN68792_c0_g1,TRINITY_DN69266_c1_g1,TRINITY_DN69571_c1_g1,TRINITY_DN69726_c2_g1,TRINITY_DN69932_c0_g3,TRINITY_DN70026_c1_g2,TRINITY_DN70156_c0_g5,TRINITY_DN70421_c0_g1,TRINITY_DN70487_c0_g1,TRI…
GO:0000910	cytokinesis	biological process	16/609	833/93642	0.00015	0.0169376033057851	TRINITY_DN64594_c0_g1,TRINITY_DN73679_c1_g2,TRINITY_DN75706_c0_g2,TRINITY_DN77234_c1_g2,TRINITY_DN79570_c1_g1,TRINITY_DN80532_c2_g2,TRINITY_DN80965_c0_g4,TRINITY_DN82458_c1_g1,TRINITY_DN89487_c0_g3,TRINITY_DN92330_c1_g2,TRINITY_DN94594_c0_g1,TRINITY_DN96030_c0_g1,TRINITY_DN97495_c2_g1,TRINITY_DN98212_c0_g1,TRINITY_DN98258_c0_g1,TRINITY_DN99026_c3_g1	TRINITY_DN64594_c0_g1,TRINITY_DN73679_c1_g2,TRINITY_DN75706_c0_g2,TRINITY_DN77234_c1_g2,TRINITY_DN79570_c1_g1,TRINITY_DN80532_c2_g2,TRINITY_DN80965_c0_g4,TRINITY_DN82458_c1_g1,TRINITY_DN89487_c0_g3,TRINITY_DN92330_c1_g2,TRINITY_DN94594_c0_g1,TRINITY_DN96030_c0_g1,TRINITY_DN97495_c2_g1,TRINITY_DN98212_c0_g1,TRINITY_DN98258_c0_g1,TRINITY_DN99026_c3_g1
GO:0030422	production of siRNA involved in RNA interference	biological process	7/609	172/93642	0.00015	0.0169376033057851	TRINITY_DN70723_c1_g1,TRINITY_DN71889_c1_g1,TRINITY_DN74503_c1_g2,TRINITY_DN84336_c1_g2,TRINITY_DN91297_c0_g1,TRINITY_DN95530_c0_g1,TRINITY_DN97759_c1_g2	TRINITY_DN70723_c1_g1,TRINITY_DN71889_c1_g1,TRINITY_DN74503_c1_g2,TRINITY_DN84336_c1_g2,TRINITY_DN91297_c0_g1,TRINITY_DN95530_c0_g1,TRINITY_DN97759_c1_g2
GO:0031969	chloroplast membrane	cellular component	15/648	793/96716	0.00037	0.017538	TRINITY_DN70885_c1_g1,TRINITY_DN77629_c0_g1,TRINITY_DN85750_c2_g1,TRINITY_DN87488_c0_g1,TRINITY_DN87488_c0_g6,TRINITY_DN87881_c0_g2,TRINITY_DN88914_c0_g1,TRINITY_DN89634_c0_g3,TRINITY_DN90493_c3_g1,TRINITY_DN91821_c1_g1,TRINITY_DN92736_c1_g3,TRINITY_DN94476_c1_g1,TRINITY_DN96139_c1_g1,TRINITY_DN97777_c2_g2,TRINITY_DN98459_c1_g1	TRINITY_DN70885_c1_g1,TRINITY_DN77629_c0_g1,TRINITY_DN85750_c2_g1,TRINITY_DN87488_c0_g1,TRINITY_DN87488_c0_g6,TRINITY_DN87881_c0_g2,TRINITY_DN88914_c0_g1,TRINITY_DN89634_c0_g3,TRINITY_DN90493_c3_g1,TRINITY_DN91821_c1_g1,TRINITY_DN92736_c1_g3,TRINITY_DN94476_c1_g1,TRINITY_DN96139_c1_g1,TRINITY_DN97777_c2_g2,TRINITY_DN98459_c1_g1
GO:1901362	organic cyclic compound biosynthetic process	biological process	142/609	16392/93642	0.00016	0.0176296774193548	TRINITY_DN66987_c0_g1,TRINITY_DN68255_c0_g1,TRINITY_DN68532_c1_g1,TRINITY_DN69416_c2_g1,TRINITY_DN70026_c1_g2,TRINITY_DN70156_c0_g5,TRINITY_DN70487_c0_g1,TRINITY_DN70831_c1_g2,TRINITY_DN71424_c1_g2,TRINITY_DN71554_c0_g1,TRINITY_DN71558_c1_g1,TRINITY_DN71855_c4_g2,TRINITY_DN72604_c1_g1,TRINITY_DN72819_c0_g1,TRINITY_DN74568_c0_g3,TRINITY_DN74697_c0_g6,TRINITY_DN74872_c1_g1,TRINITY_DN76045_c0_g1,TRI…	TRINITY_DN66987_c0_g1,TRINITY_DN68255_c0_g1,TRINITY_DN68532_c1_g1,TRINITY_DN69416_c2_g1,TRINITY_DN70026_c1_g2,TRINITY_DN70156_c0_g5,TRINITY_DN70487_c0_g1,TRINITY_DN70831_c1_g2,TRINITY_DN71424_c1_g2,TRINITY_DN71554_c0_g1,TRINITY_DN71558_c1_g1,TRINITY_DN71855_c4_g2,TRINITY_DN72604_c1_g1,TRINITY_DN72819_c0_g1,TRINITY_DN74568_c0_g3,TRINITY_DN74697_c0_g6,TRINITY_DN74872_c1_g1,TRINITY_DN76045_c0_g1,TRI…
GO:0009808	lignin metabolic process	biological process	9/609	295/93642	0.00016	0.0176296774193548	TRINITY_DN72281_c0_g1,TRINITY_DN72604_c1_g1,TRINITY_DN77989_c3_g2,TRINITY_DN80907_c1_g1,TRINITY_DN81440_c1_g1,TRINITY_DN81857_c0_g1,TRINITY_DN81857_c0_g3,TRINITY_DN95201_c2_g4,TRINITY_DN98228_c0_g1	TRINITY_DN72281_c0_g1,TRINITY_DN72604_c1_g1,TRINITY_DN77989_c3_g2,TRINITY_DN80907_c1_g1,TRINITY_DN81440_c1_g1,TRINITY_DN81857_c0_g1,TRINITY_DN81857_c0_g3,TRINITY_DN95201_c2_g4,TRINITY_DN98228_c0_g1
GO:0044030	regulation of DNA methylation	biological process	4/609	42/93642	0.00016	0.0176296774193548	TRINITY_DN96368_c1_g3,TRINITY_DN96797_c0_g4,TRINITY_DN97461_c0_g1,TRINITY_DN97461_c0_g2	TRINITY_DN96368_c1_g3,TRINITY_DN96797_c0_g4,TRINITY_DN97461_c0_g1,TRINITY_DN97461_c0_g2
GO:0005506	iron ion binding	molecular function	33/669	2312/102170	3.5e-05	0.0179083333333333	TRINITY_DN68475_c0_g1,TRINITY_DN68475_c0_g3,TRINITY_DN70599_c1_g1,TRINITY_DN70599_c1_g3,TRINITY_DN70885_c1_g1,TRINITY_DN72866_c0_g3,TRINITY_DN74234_c0_g4,TRINITY_DN75228_c3_g1,TRINITY_DN77442_c1_g3,TRINITY_DN78453_c0_g1,TRINITY_DN79594_c1_g2,TRINITY_DN80284_c2_g1,TRINITY_DN81308_c1_g1,TRINITY_DN83616_c0_g4,TRINITY_DN84104_c2_g4,TRINITY_DN89775_c2_g5,TRINITY_DN91037_c2_g3,TRINITY_DN92418_c0_g2,TRI…	TRINITY_DN68475_c0_g1,TRINITY_DN68475_c0_g3,TRINITY_DN70599_c1_g1,TRINITY_DN70599_c1_g3,TRINITY_DN70885_c1_g1,TRINITY_DN72866_c0_g3,TRINITY_DN74234_c0_g4,TRINITY_DN75228_c3_g1,TRINITY_DN77442_c1_g3,TRINITY_DN78453_c0_g1,TRINITY_DN79594_c1_g2,TRINITY_DN80284_c2_g1,TRINITY_DN81308_c1_g1,TRINITY_DN83616_c0_g4,TRINITY_DN84104_c2_g4,TRINITY_DN89775_c2_g5,TRINITY_DN91037_c2_g3,TRINITY_DN92418_c0_g2,TRI…
GO:0043414	macromolecule methylation	biological process	17/609	934/93642	0.00017	0.0184342063492063	TRINITY_DN68255_c0_g1,TRINITY_DN70421_c0_g1,TRINITY_DN71855_c4_g2,TRINITY_DN72819_c0_g1,TRINITY_DN75121_c0_g4,TRINITY_DN80794_c0_g1,TRINITY_DN84336_c1_g2,TRINITY_DN89410_c0_g2,TRINITY_DN91784_c1_g1,TRINITY_DN93239_c0_g2,TRINITY_DN94594_c0_g1,TRINITY_DN95775_c0_g1,TRINITY_DN96029_c2_g1,TRINITY_DN96368_c1_g3,TRINITY_DN96797_c0_g4,TRINITY_DN97461_c0_g1,TRINITY_DN97461_c0_g2	TRINITY_DN68255_c0_g1,TRINITY_DN70421_c0_g1,TRINITY_DN71855_c4_g2,TRINITY_DN72819_c0_g1,TRINITY_DN75121_c0_g4,TRINITY_DN80794_c0_g1,TRINITY_DN84336_c1_g2,TRINITY_DN89410_c0_g2,TRINITY_DN91784_c1_g1,TRINITY_DN93239_c0_g2,TRINITY_DN94594_c0_g1,TRINITY_DN95775_c0_g1,TRINITY_DN96029_c2_g1,TRINITY_DN96368_c1_g3,TRINITY_DN96797_c0_g4,TRINITY_DN97461_c0_g1,TRINITY_DN97461_c0_g2
GO:0061512	protein localization to cilium	biological process	3/609	17/93642	0.00017	0.0184342063492063	TRINITY_DN78689_c0_g1,TRINITY_DN87220_c0_g6,TRINITY_DN97761_c2_g3	TRINITY_DN78689_c0_g1,TRINITY_DN87220_c0_g6,TRINITY_DN97761_c2_g3
GO:0004402	histone acetyltransferase activity	molecular function	7/669	141/102170	4.4e-05	0.0192572727272727	TRINITY_DN83047_c1_g1,TRINITY_DN91545_c0_g4,TRINITY_DN94399_c1_g1,TRINITY_DN96368_c1_g3,TRINITY_DN96797_c0_g4,TRINITY_DN97461_c0_g1,TRINITY_DN97461_c0_g2	TRINITY_DN83047_c1_g1,TRINITY_DN91545_c0_g4,TRINITY_DN94399_c1_g1,TRINITY_DN96368_c1_g3,TRINITY_DN96797_c0_g4,TRINITY_DN97461_c0_g1,TRINITY_DN97461_c0_g2
GO:0061733	peptide-lysine-N-acetyltransferase activity	molecular function	7/669	142/102170	4.6e-05	0.0192572727272727	TRINITY_DN83047_c1_g1,TRINITY_DN91545_c0_g4,TRINITY_DN94399_c1_g1,TRINITY_DN96368_c1_g3,TRINITY_DN96797_c0_g4,TRINITY_DN97461_c0_g1,TRINITY_DN97461_c0_g2	TRINITY_DN83047_c1_g1,TRINITY_DN91545_c0_g4,TRINITY_DN94399_c1_g1,TRINITY_DN96368_c1_g3,TRINITY_DN96797_c0_g4,TRINITY_DN97461_c0_g1,TRINITY_DN97461_c0_g2
GO:0048827	phyllome development	biological process	19/609	1127/93642	0.00019	0.0204407086614173	TRINITY_DN68079_c0_g2,TRINITY_DN70487_c0_g1,TRINITY_DN73679_c0_g1,TRINITY_DN74096_c1_g1,TRINITY_DN75121_c0_g4,TRINITY_DN76045_c0_g1,TRINITY_DN77469_c0_g4,TRINITY_DN80884_c0_g1,TRINITY_DN82801_c0_g1,TRINITY_DN83719_c0_g4,TRINITY_DN84469_c1_g1,TRINITY_DN85750_c2_g1,TRINITY_DN92488_c0_g1,TRINITY_DN94649_c0_g3,TRINITY_DN95710_c3_g2,TRINITY_DN97471_c1_g1,TRINITY_DN97709_c0_g1,TRINITY_DN98191_c1_g2,TRI…	TRINITY_DN68079_c0_g2,TRINITY_DN70487_c0_g1,TRINITY_DN73679_c0_g1,TRINITY_DN74096_c1_g1,TRINITY_DN75121_c0_g4,TRINITY_DN76045_c0_g1,TRINITY_DN77469_c0_g4,TRINITY_DN80884_c0_g1,TRINITY_DN82801_c0_g1,TRINITY_DN83719_c0_g4,TRINITY_DN84469_c1_g1,TRINITY_DN85750_c2_g1,TRINITY_DN92488_c0_g1,TRINITY_DN94649_c0_g3,TRINITY_DN95710_c3_g2,TRINITY_DN97471_c1_g1,TRINITY_DN97709_c0_g1,TRINITY_DN98191_c1_g2,TRI…
GO:0060968	regulation of gene silencing	biological process	8/609	240/93642	0.00020	0.0213484375	TRINITY_DN72819_c0_g1,TRINITY_DN83047_c1_g1,TRINITY_DN89410_c0_g2,TRINITY_DN91545_c0_g4,TRINITY_DN91784_c1_g1,TRINITY_DN93339_c1_g1,TRINITY_DN93358_c0_g3,TRINITY_DN95775_c0_g1	TRINITY_DN72819_c0_g1,TRINITY_DN83047_c1_g1,TRINITY_DN89410_c0_g2,TRINITY_DN91545_c0_g4,TRINITY_DN91784_c1_g1,TRINITY_DN93339_c1_g1,TRINITY_DN93358_c0_g3,TRINITY_DN95775_c0_g1
GO:0042170	plastid membrane	cellular component	15/648	817/96716	0.00051	0.0235843902439024	TRINITY_DN70885_c1_g1,TRINITY_DN77629_c0_g1,TRINITY_DN85750_c2_g1,TRINITY_DN87488_c0_g1,TRINITY_DN87488_c0_g6,TRINITY_DN87881_c0_g2,TRINITY_DN88914_c0_g1,TRINITY_DN89634_c0_g3,TRINITY_DN90493_c3_g1,TRINITY_DN91821_c1_g1,TRINITY_DN92736_c1_g3,TRINITY_DN94476_c1_g1,TRINITY_DN96139_c1_g1,TRINITY_DN97777_c2_g2,TRINITY_DN98459_c1_g1	TRINITY_DN70885_c1_g1,TRINITY_DN77629_c0_g1,TRINITY_DN85750_c2_g1,TRINITY_DN87488_c0_g1,TRINITY_DN87488_c0_g6,TRINITY_DN87881_c0_g2,TRINITY_DN88914_c0_g1,TRINITY_DN89634_c0_g3,TRINITY_DN90493_c3_g1,TRINITY_DN91821_c1_g1,TRINITY_DN92736_c1_g3,TRINITY_DN94476_c1_g1,TRINITY_DN96139_c1_g1,TRINITY_DN97777_c2_g2,TRINITY_DN98459_c1_g1
GO:0001763	morphogenesis of a branching structure	biological process	5/609	84/93642	0.00023	0.024173	TRINITY_DN74872_c1_g1,TRINITY_DN75121_c0_g4,TRINITY_DN83047_c1_g1,TRINITY_DN91545_c0_g4,TRINITY_DN95511_c3_g4	TRINITY_DN74872_c1_g1,TRINITY_DN75121_c0_g4,TRINITY_DN83047_c1_g1,TRINITY_DN91545_c0_g4,TRINITY_DN95511_c3_g4
GO:0007623	circadian rhythm	biological process	10/609	381/93642	0.00023	0.024173	TRINITY_DN81857_c0_g1,TRINITY_DN81857_c0_g3,TRINITY_DN84175_c3_g2,TRINITY_DN84523_c1_g1,TRINITY_DN87544_c1_g3,TRINITY_DN93239_c0_g2,TRINITY_DN93948_c1_g2,TRINITY_DN97143_c3_g2,TRINITY_DN97143_c3_g3,TRINITY_DN98228_c0_g1	TRINITY_DN81857_c0_g1,TRINITY_DN81857_c0_g3,TRINITY_DN84175_c3_g2,TRINITY_DN84523_c1_g1,TRINITY_DN87544_c1_g3,TRINITY_DN93239_c0_g2,TRINITY_DN93948_c1_g2,TRINITY_DN97143_c3_g2,TRINITY_DN97143_c3_g3,TRINITY_DN98228_c0_g1
GO:0070887	cellular response to chemical stimulus	biological process	61/609	5868/93642	0.00024	0.024655037593985	TRINITY_DN68434_c0_g1,TRINITY_DN68532_c1_g1,TRINITY_DN69399_c0_g2,TRINITY_DN70026_c1_g2,TRINITY_DN70723_c1_g1,TRINITY_DN71306_c1_g4,TRINITY_DN71889_c1_g1,TRINITY_DN72819_c0_g1,TRINITY_DN72989_c0_g1,TRINITY_DN73324_c3_g1,TRINITY_DN74096_c1_g1,TRINITY_DN74503_c1_g2,TRINITY_DN74568_c0_g3,TRINITY_DN74996_c0_g1,TRINITY_DN75228_c3_g1,TRINITY_DN75340_c0_g3,TRINITY_DN75411_c0_g3,TRINITY_DN76045_c0_g1,TRI…	TRINITY_DN68434_c0_g1,TRINITY_DN68532_c1_g1,TRINITY_DN69399_c0_g2,TRINITY_DN70026_c1_g2,TRINITY_DN70723_c1_g1,TRINITY_DN71306_c1_g4,TRINITY_DN71889_c1_g1,TRINITY_DN72819_c0_g1,TRINITY_DN72989_c0_g1,TRINITY_DN73324_c3_g1,TRINITY_DN74096_c1_g1,TRINITY_DN74503_c1_g2,TRINITY_DN74568_c0_g3,TRINITY_DN74996_c0_g1,TRINITY_DN75228_c3_g1,TRINITY_DN75340_c0_g3,TRINITY_DN75411_c0_g3,TRINITY_DN76045_c0_g1,TRI…
GO:0006325	chromatin organization	biological process	26/609	1840/93642	0.00024	0.024655037593985	TRINITY_DN68255_c0_g1,TRINITY_DN70725_c1_g7,TRINITY_DN71855_c4_g2,TRINITY_DN72819_c0_g1,TRINITY_DN75121_c0_g4,TRINITY_DN83047_c1_g1,TRINITY_DN83066_c1_g3,TRINITY_DN89410_c0_g2,TRINITY_DN91545_c0_g4,TRINITY_DN91784_c1_g1,TRINITY_DN93239_c0_g2,TRINITY_DN93339_c1_g1,TRINITY_DN93850_c1_g5,TRINITY_DN95530_c0_g1,TRINITY_DN95775_c0_g1,TRINITY_DN96029_c2_g1,TRINITY_DN96368_c1_g3,TRINITY_DN96369_c2_g1,TRI…	TRINITY_DN68255_c0_g1,TRINITY_DN70725_c1_g7,TRINITY_DN71855_c4_g2,TRINITY_DN72819_c0_g1,TRINITY_DN75121_c0_g4,TRINITY_DN83047_c1_g1,TRINITY_DN83066_c1_g3,TRINITY_DN89410_c0_g2,TRINITY_DN91545_c0_g4,TRINITY_DN91784_c1_g1,TRINITY_DN93239_c0_g2,TRINITY_DN93339_c1_g1,TRINITY_DN93850_c1_g5,TRINITY_DN95530_c0_g1,TRINITY_DN95775_c0_g1,TRINITY_DN96029_c2_g1,TRINITY_DN96368_c1_g3,TRINITY_DN96369_c2_g1,TRI…
GO:0000271	polysaccharide biosynthetic process	biological process	19/609	1147/93642	0.00024	0.024655037593985	TRINITY_DN64594_c0_g1,TRINITY_DN73173_c0_g2,TRINITY_DN73944_c3_g3,TRINITY_DN77296_c1_g1,TRINITY_DN80965_c0_g4,TRINITY_DN82458_c1_g1,TRINITY_DN86425_c1_g1,TRINITY_DN89487_c0_g3,TRINITY_DN91323_c1_g5,TRINITY_DN91736_c1_g1,TRINITY_DN94345_c0_g1,TRINITY_DN94349_c0_g2,TRINITY_DN96216_c0_g1,TRINITY_DN96775_c3_g1,TRINITY_DN97121_c1_g1,TRINITY_DN97667_c3_g2,TRINITY_DN98392_c2_g1,TRINITY_DN98589_c2_g1,TRI…	TRINITY_DN64594_c0_g1,TRINITY_DN73173_c0_g2,TRINITY_DN73944_c3_g3,TRINITY_DN77296_c1_g1,TRINITY_DN80965_c0_g4,TRINITY_DN82458_c1_g1,TRINITY_DN86425_c1_g1,TRINITY_DN89487_c0_g3,TRINITY_DN91323_c1_g5,TRINITY_DN91736_c1_g1,TRINITY_DN94345_c0_g1,TRINITY_DN94349_c0_g2,TRINITY_DN96216_c0_g1,TRINITY_DN96775_c3_g1,TRINITY_DN97121_c1_g1,TRINITY_DN97667_c3_g2,TRINITY_DN98392_c2_g1,TRINITY_DN98589_c2_g1,TRI…
GO:0005886	plasma membrane	cellular component	141/648	16211/96716	0.00056	0.02528	TRINITY_DN64594_c0_g1,TRINITY_DN66768_c0_g1,TRINITY_DN67158_c0_g1,TRINITY_DN68079_c0_g2,TRINITY_DN68224_c1_g5,TRINITY_DN68838_c0_g1,TRINITY_DN69671_c1_g2,TRINITY_DN71042_c0_g1,TRINITY_DN71060_c0_g3,TRINITY_DN71143_c0_g1,TRINITY_DN71554_c0_g1,TRINITY_DN71824_c1_g1,TRINITY_DN71958_c2_g1,TRINITY_DN72745_c1_g1,TRINITY_DN72989_c0_g1,TRINITY_DN73104_c3_g1,TRINITY_DN73130_c0_g1,TRINITY_DN73145_c2_g1,TRI…	TRINITY_DN64594_c0_g1,TRINITY_DN66768_c0_g1,TRINITY_DN67158_c0_g1,TRINITY_DN68079_c0_g2,TRINITY_DN68224_c1_g5,TRINITY_DN68838_c0_g1,TRINITY_DN69671_c1_g2,TRINITY_DN71042_c0_g1,TRINITY_DN71060_c0_g3,TRINITY_DN71143_c0_g1,TRINITY_DN71554_c0_g1,TRINITY_DN71824_c1_g1,TRINITY_DN71958_c2_g1,TRINITY_DN72745_c1_g1,TRINITY_DN72989_c0_g1,TRINITY_DN73104_c3_g1,TRINITY_DN73130_c0_g1,TRINITY_DN73145_c2_g1,TRI…
GO:0007018	microtubule-based movement	biological process	10/609	384/93642	0.00025	0.0253018518518518	TRINITY_DN78689_c0_g1,TRINITY_DN80494_c0_g1,TRINITY_DN82769_c1_g2,TRINITY_DN84678_c0_g1,TRINITY_DN90122_c0_g1,TRINITY_DN92330_c1_g2,TRINITY_DN92678_c1_g2,TRINITY_DN96314_c1_g1,TRINITY_DN97495_c2_g1,TRINITY_DN98277_c2_g1	TRINITY_DN78689_c0_g1,TRINITY_DN80494_c0_g1,TRINITY_DN82769_c1_g2,TRINITY_DN84678_c0_g1,TRINITY_DN90122_c0_g1,TRINITY_DN92330_c1_g2,TRINITY_DN92678_c1_g2,TRINITY_DN96314_c1_g1,TRINITY_DN97495_c2_g1,TRINITY_DN98277_c2_g1
GO:0010495	long-distance posttranscriptional gene silencing	biological process	2/609	4/93642	0.00025	0.0253018518518518	TRINITY_DN91297_c0_g1,TRINITY_DN95530_c0_g1	TRINITY_DN91297_c0_g1,TRINITY_DN95530_c0_g1
GO:0043229	intracellular organelle	cellular component	455/648	62005/96716	0.00058	0.0255739534883721	TRINITY_DN64594_c0_g1,TRINITY_DN65824_c0_g1,TRINITY_DN67158_c0_g1,TRINITY_DN68255_c0_g1,TRINITY_DN68434_c0_g1,TRINITY_DN68475_c0_g1,TRINITY_DN68475_c0_g3,TRINITY_DN68532_c1_g1,TRINITY_DN68749_c0_g1,TRINITY_DN68792_c0_g1,TRINITY_DN69266_c1_g1,TRINITY_DN69571_c1_g1,TRINITY_DN69726_c2_g1,TRINITY_DN69932_c0_g3,TRINITY_DN70026_c1_g2,TRINITY_DN70156_c0_g5,TRINITY_DN70421_c0_g1,TRINITY_DN70487_c0_g1,TRI…	TRINITY_DN64594_c0_g1,TRINITY_DN65824_c0_g1,TRINITY_DN67158_c0_g1,TRINITY_DN68255_c0_g1,TRINITY_DN68434_c0_g1,TRINITY_DN68475_c0_g1,TRINITY_DN68475_c0_g3,TRINITY_DN68532_c1_g1,TRINITY_DN68749_c0_g1,TRINITY_DN68792_c0_g1,TRINITY_DN69266_c1_g1,TRINITY_DN69571_c1_g1,TRINITY_DN69726_c2_g1,TRINITY_DN69932_c0_g3,TRINITY_DN70026_c1_g2,TRINITY_DN70156_c0_g5,TRINITY_DN70421_c0_g1,TRINITY_DN70487_c0_g1,TRI…
GO:0010087	phloem or xylem histogenesis	biological process	7/609	190/93642	0.00027	0.0267319565217391	TRINITY_DN70156_c0_g5,TRINITY_DN70723_c1_g1,TRINITY_DN80884_c0_g1,TRINITY_DN88959_c0_g1,TRINITY_DN96030_c0_g1,TRINITY_DN97262_c0_g2,TRINITY_DN98453_c1_g1	TRINITY_DN70156_c0_g5,TRINITY_DN70723_c1_g1,TRINITY_DN80884_c0_g1,TRINITY_DN88959_c0_g1,TRINITY_DN96030_c0_g1,TRINITY_DN97262_c0_g2,TRINITY_DN98453_c1_g1
GO:0010104	regulation of ethylene-activated signaling pathway	biological process	5/609	87/93642	0.00027	0.0267319565217391	TRINITY_DN68434_c0_g1,TRINITY_DN85980_c1_g1,TRINITY_DN96351_c1_g2,TRINITY_DN97953_c3_g4,TRINITY_DN97970_c2_g1	TRINITY_DN68434_c0_g1,TRINITY_DN85980_c1_g1,TRINITY_DN96351_c1_g2,TRINITY_DN97953_c3_g4,TRINITY_DN97970_c2_g1
GO:0070297	regulation of phosphorelay signal transduction system	biological process	5/609	87/93642	0.00027	0.0267319565217391	TRINITY_DN68434_c0_g1,TRINITY_DN85980_c1_g1,TRINITY_DN96351_c1_g2,TRINITY_DN97953_c3_g4,TRINITY_DN97970_c2_g1	TRINITY_DN68434_c0_g1,TRINITY_DN85980_c1_g1,TRINITY_DN96351_c1_g2,TRINITY_DN97953_c3_g4,TRINITY_DN97970_c2_g1
GO:0006721	terpenoid metabolic process	biological process	13/609	625/93642	0.00028	0.0275225899280576	TRINITY_DN69416_c2_g1,TRINITY_DN70885_c1_g1,TRINITY_DN73654_c0_g1,TRINITY_DN74872_c1_g1,TRINITY_DN75121_c0_g4,TRINITY_DN75228_c3_g1,TRINITY_DN77743_c0_g1,TRINITY_DN85750_c2_g1,TRINITY_DN87944_c0_g3,TRINITY_DN92852_c0_g3,TRINITY_DN93940_c0_g3,TRINITY_DN94629_c2_g1,TRINITY_DN96650_c2_g2	TRINITY_DN69416_c2_g1,TRINITY_DN70885_c1_g1,TRINITY_DN73654_c0_g1,TRINITY_DN74872_c1_g1,TRINITY_DN75121_c0_g4,TRINITY_DN75228_c3_g1,TRINITY_DN77743_c0_g1,TRINITY_DN85750_c2_g1,TRINITY_DN87944_c0_g3,TRINITY_DN92852_c0_g3,TRINITY_DN93940_c0_g3,TRINITY_DN94629_c2_g1,TRINITY_DN96650_c2_g2
GO:0010091	trichome branching	biological process	5/609	88/93642	0.00029	0.0283019285714286	TRINITY_DN73145_c2_g1,TRINITY_DN73679_c0_g1,TRINITY_DN80373_c0_g1,TRINITY_DN97736_c4_g5,TRINITY_DN97736_c4_g6	TRINITY_DN73145_c2_g1,TRINITY_DN73679_c0_g1,TRINITY_DN80373_c0_g1,TRINITY_DN97736_c4_g5,TRINITY_DN97736_c4_g6
GO:0009629	response to gravity	biological process	7/609	194/93642	0.00031	0.030039219858156	TRINITY_DN74096_c1_g1,TRINITY_DN74996_c0_g1,TRINITY_DN86517_c1_g1,TRINITY_DN95710_c3_g2,TRINITY_DN97626_c2_g1,TRINITY_DN97936_c1_g1,TRINITY_DN98591_c5_g2	TRINITY_DN74096_c1_g1,TRINITY_DN74996_c0_g1,TRINITY_DN86517_c1_g1,TRINITY_DN95710_c3_g2,TRINITY_DN97626_c2_g1,TRINITY_DN97936_c1_g1,TRINITY_DN98591_c5_g2
GO:0009699	phenylpropanoid biosynthetic process	biological process	9/609	326/93642	0.00033	0.0317520422535211	TRINITY_DN72604_c1_g1,TRINITY_DN77989_c3_g2,TRINITY_DN80907_c1_g1,TRINITY_DN81440_c1_g1,TRINITY_DN81857_c0_g1,TRINITY_DN81857_c0_g3,TRINITY_DN85704_c1_g3,TRINITY_DN95201_c2_g4,TRINITY_DN98228_c0_g1	TRINITY_DN72604_c1_g1,TRINITY_DN77989_c3_g2,TRINITY_DN80907_c1_g1,TRINITY_DN81440_c1_g1,TRINITY_DN81857_c0_g1,TRINITY_DN81857_c0_g3,TRINITY_DN85704_c1_g3,TRINITY_DN95201_c2_g4,TRINITY_DN98228_c0_g1
GO:0006720	isoprenoid metabolic process	biological process	16/609	899/93642	0.00034	0.0324854545454545	TRINITY_DN69416_c2_g1,TRINITY_DN70885_c1_g1,TRINITY_DN73654_c0_g1,TRINITY_DN74872_c1_g1,TRINITY_DN75121_c0_g4,TRINITY_DN75228_c3_g1,TRINITY_DN77743_c0_g1,TRINITY_DN85750_c2_g1,TRINITY_DN87125_c0_g3,TRINITY_DN87944_c0_g3,TRINITY_DN89072_c1_g3,TRINITY_DN92852_c0_g3,TRINITY_DN93940_c0_g3,TRINITY_DN94629_c2_g1,TRINITY_DN96650_c2_g2,TRINITY_DN98259_c2_g3	TRINITY_DN69416_c2_g1,TRINITY_DN70885_c1_g1,TRINITY_DN73654_c0_g1,TRINITY_DN74872_c1_g1,TRINITY_DN75121_c0_g4,TRINITY_DN75228_c3_g1,TRINITY_DN77743_c0_g1,TRINITY_DN85750_c2_g1,TRINITY_DN87125_c0_g3,TRINITY_DN87944_c0_g3,TRINITY_DN89072_c1_g3,TRINITY_DN92852_c0_g3,TRINITY_DN93940_c0_g3,TRINITY_DN94629_c2_g1,TRINITY_DN96650_c2_g2,TRINITY_DN98259_c2_g3
GO:0016246	RNA interference	biological process	7/609	198/93642	0.00035	0.0332086805555556	TRINITY_DN70723_c1_g1,TRINITY_DN71889_c1_g1,TRINITY_DN74503_c1_g2,TRINITY_DN84336_c1_g2,TRINITY_DN91297_c0_g1,TRINITY_DN95530_c0_g1,TRINITY_DN97759_c1_g2	TRINITY_DN70723_c1_g1,TRINITY_DN71889_c1_g1,TRINITY_DN74503_c1_g2,TRINITY_DN84336_c1_g2,TRINITY_DN91297_c0_g1,TRINITY_DN95530_c0_g1,TRINITY_DN97759_c1_g2
GO:0006537	glutamate biosynthetic process	biological process	5/609	93/93642	0.00037	0.0348642068965517	TRINITY_DN79475_c1_g2,TRINITY_DN81308_c1_g1,TRINITY_DN88249_c2_g1,TRINITY_DN96037_c1_g1,TRINITY_DN96704_c2_g2	TRINITY_DN79475_c1_g2,TRINITY_DN81308_c1_g1,TRINITY_DN88249_c2_g1,TRINITY_DN96037_c1_g1,TRINITY_DN96704_c2_g2
GO:0004526	ribonuclease P activity	molecular function	6/669	110/102170	9.3e-05	0.03568875	TRINITY_DN70421_c0_g1,TRINITY_DN71889_c1_g1,TRINITY_DN73444_c1_g3,TRINITY_DN74503_c1_g2,TRINITY_DN80794_c0_g1,TRINITY_DN83048_c1_g1	TRINITY_DN70421_c0_g1,TRINITY_DN71889_c1_g1,TRINITY_DN73444_c1_g3,TRINITY_DN74503_c1_g2,TRINITY_DN80794_c0_g1,TRINITY_DN83048_c1_g1
GO:0008017	microtubule binding	molecular function	7/669	166/102170	0.00012	0.0394714285714286	TRINITY_DN77234_c1_g2,TRINITY_DN77469_c0_g1,TRINITY_DN79570_c1_g1,TRINITY_DN93760_c2_g1,TRINITY_DN94607_c0_g1,TRINITY_DN97495_c2_g1,TRINITY_DN98258_c0_g1	TRINITY_DN77234_c1_g2,TRINITY_DN77469_c0_g1,TRINITY_DN79570_c1_g1,TRINITY_DN93760_c2_g1,TRINITY_DN94607_c0_g1,TRINITY_DN97495_c2_g1,TRINITY_DN98258_c0_g1
GO:0010385	double-stranded methylated DNA binding	molecular function	4/669	39/102170	0.00012	0.0394714285714286	TRINITY_DN96368_c1_g3,TRINITY_DN96797_c0_g4,TRINITY_DN97461_c0_g1,TRINITY_DN97461_c0_g2	TRINITY_DN96368_c1_g3,TRINITY_DN96797_c0_g4,TRINITY_DN97461_c0_g1,TRINITY_DN97461_c0_g2
GO:0016709	oxidoreductase activity, acting on paired donors, with incorporation or reduction of molecular oxyge...	molecular function	15/669	735/102170	0.00013	0.03991	TRINITY_DN68475_c0_g1,TRINITY_DN68475_c0_g3,TRINITY_DN70599_c1_g3,TRINITY_DN72866_c0_g3,TRINITY_DN78453_c0_g1,TRINITY_DN79594_c1_g2,TRINITY_DN89775_c2_g5,TRINITY_DN92418_c0_g2,TRINITY_DN92708_c1_g2,TRINITY_DN93967_c0_g1,TRINITY_DN94629_c2_g1,TRINITY_DN95494_c1_g1,TRINITY_DN96935_c2_g2,TRINITY_DN98582_c6_g1,TRINITY_DN98582_c6_g3	TRINITY_DN68475_c0_g1,TRINITY_DN68475_c0_g3,TRINITY_DN70599_c1_g3,TRINITY_DN72866_c0_g3,TRINITY_DN78453_c0_g1,TRINITY_DN79594_c1_g2,TRINITY_DN89775_c2_g5,TRINITY_DN92418_c0_g2,TRINITY_DN92708_c1_g2,TRINITY_DN93967_c0_g1,TRINITY_DN94629_c2_g1,TRINITY_DN95494_c1_g1,TRINITY_DN96935_c2_g2,TRINITY_DN98582_c6_g1,TRINITY_DN98582_c6_g3
GO:0003774	motor activity	molecular function	14/669	661/102170	0.00015	0.0406323529411765	TRINITY_DN71284_c1_g1,TRINITY_DN73679_c0_g1,TRINITY_DN80494_c0_g1,TRINITY_DN82769_c1_g2,TRINITY_DN83889_c0_g2,TRINITY_DN84678_c0_g1,TRINITY_DN86288_c0_g1,TRINITY_DN90122_c0_g1,TRINITY_DN92330_c1_g2,TRINITY_DN92678_c1_g2,TRINITY_DN96314_c1_g1,TRINITY_DN96474_c1_g1,TRINITY_DN97495_c2_g1,TRINITY_DN98277_c2_g1	TRINITY_DN71284_c1_g1,TRINITY_DN73679_c0_g1,TRINITY_DN80494_c0_g1,TRINITY_DN82769_c1_g2,TRINITY_DN83889_c0_g2,TRINITY_DN84678_c0_g1,TRINITY_DN86288_c0_g1,TRINITY_DN90122_c0_g1,TRINITY_DN92330_c1_g2,TRINITY_DN92678_c1_g2,TRINITY_DN96314_c1_g1,TRINITY_DN96474_c1_g1,TRINITY_DN97495_c2_g1,TRINITY_DN98277_c2_g1
GO:0016407	acetyltransferase activity	molecular function	16/669	831/102170	0.00015	0.0406323529411765	TRINITY_DN68792_c0_g1,TRINITY_DN74697_c0_g6,TRINITY_DN75021_c0_g3,TRINITY_DN81502_c0_g2,TRINITY_DN82528_c0_g1,TRINITY_DN83047_c1_g1,TRINITY_DN86405_c1_g1,TRINITY_DN89072_c1_g3,TRINITY_DN91545_c0_g4,TRINITY_DN94399_c1_g1,TRINITY_DN96368_c1_g3,TRINITY_DN96380_c1_g3,TRINITY_DN96797_c0_g4,TRINITY_DN97461_c0_g1,TRINITY_DN97461_c0_g2,TRINITY_DN98259_c2_g3	TRINITY_DN68792_c0_g1,TRINITY_DN74697_c0_g6,TRINITY_DN75021_c0_g3,TRINITY_DN81502_c0_g2,TRINITY_DN82528_c0_g1,TRINITY_DN83047_c1_g1,TRINITY_DN86405_c1_g1,TRINITY_DN89072_c1_g3,TRINITY_DN91545_c0_g4,TRINITY_DN94399_c1_g1,TRINITY_DN96368_c1_g3,TRINITY_DN96380_c1_g3,TRINITY_DN96797_c0_g4,TRINITY_DN97461_c0_g1,TRINITY_DN97461_c0_g2,TRINITY_DN98259_c2_g3
GO:0008194	UDP-glycosyltransferase activity	molecular function	23/669	1482/102170	0.00016	0.0409333333333333	TRINITY_DN64594_c0_g1,TRINITY_DN69932_c0_g3,TRINITY_DN73173_c0_g2,TRINITY_DN73194_c1_g1,TRINITY_DN73944_c3_g3,TRINITY_DN77296_c1_g1,TRINITY_DN80965_c0_g4,TRINITY_DN81990_c0_g1,TRINITY_DN82458_c1_g1,TRINITY_DN86425_c1_g1,TRINITY_DN87084_c1_g4,TRINITY_DN89487_c0_g3,TRINITY_DN91736_c1_g1,TRINITY_DN92140_c0_g6,TRINITY_DN95367_c0_g1,TRINITY_DN96216_c0_g1,TRINITY_DN96584_c3_g4,TRINITY_DN96892_c2_g1,TRI…	TRINITY_DN64594_c0_g1,TRINITY_DN69932_c0_g3,TRINITY_DN73173_c0_g2,TRINITY_DN73194_c1_g1,TRINITY_DN73944_c3_g3,TRINITY_DN77296_c1_g1,TRINITY_DN80965_c0_g4,TRINITY_DN81990_c0_g1,TRINITY_DN82458_c1_g1,TRINITY_DN86425_c1_g1,TRINITY_DN87084_c1_g4,TRINITY_DN89487_c0_g3,TRINITY_DN91736_c1_g1,TRINITY_DN92140_c0_g6,TRINITY_DN95367_c0_g1,TRINITY_DN96216_c0_g1,TRINITY_DN96584_c3_g4,TRINITY_DN96892_c2_g1,TRI…
GO:0018130	heterocycle biosynthetic process	biological process	129/609	14998/93642	0.00046	0.0430478082191781	TRINITY_DN66987_c0_g1,TRINITY_DN68255_c0_g1,TRINITY_DN68532_c1_g1,TRINITY_DN70026_c1_g2,TRINITY_DN70156_c0_g5,TRINITY_DN70487_c0_g1,TRINITY_DN70831_c1_g2,TRINITY_DN71424_c1_g2,TRINITY_DN71554_c0_g1,TRINITY_DN71558_c1_g1,TRINITY_DN71855_c4_g2,TRINITY_DN72819_c0_g1,TRINITY_DN74568_c0_g3,TRINITY_DN74697_c0_g6,TRINITY_DN74872_c1_g1,TRINITY_DN76045_c0_g1,TRINITY_DN76917_c3_g1,TRINITY_DN77126_c1_g2,TRI…	TRINITY_DN66987_c0_g1,TRINITY_DN68255_c0_g1,TRINITY_DN68532_c1_g1,TRINITY_DN70026_c1_g2,TRINITY_DN70156_c0_g5,TRINITY_DN70487_c0_g1,TRINITY_DN70831_c1_g2,TRINITY_DN71424_c1_g2,TRINITY_DN71554_c0_g1,TRINITY_DN71558_c1_g1,TRINITY_DN71855_c4_g2,TRINITY_DN72819_c0_g1,TRINITY_DN74568_c0_g3,TRINITY_DN74697_c0_g6,TRINITY_DN74872_c1_g1,TRINITY_DN76045_c0_g1,TRINITY_DN76917_c3_g1,TRINITY_DN77126_c1_g2,TRI…
GO:0042409	caffeoyl-CoA O-methyltransferase activity	molecular function	3/669	17/102170	0.00018	0.0436263157894737	TRINITY_DN77989_c3_g2,TRINITY_DN80907_c1_g1,TRINITY_DN95201_c2_g4	TRINITY_DN77989_c3_g2,TRINITY_DN80907_c1_g1,TRINITY_DN95201_c2_g4
GO:0000904	cell morphogenesis involved in differentiation	biological process	15/609	836/93642	0.00047	0.0436844217687075	TRINITY_DN70911_c2_g1,TRINITY_DN73145_c2_g1,TRINITY_DN73374_c1_g2,TRINITY_DN73679_c0_g1,TRINITY_DN78801_c1_g1,TRINITY_DN80373_c0_g1,TRINITY_DN86504_c0_g1,TRINITY_DN87707_c0_g1,TRINITY_DN88188_c0_g5,TRINITY_DN88748_c0_g4,TRINITY_DN89072_c1_g3,TRINITY_DN97161_c2_g1,TRINITY_DN97736_c4_g5,TRINITY_DN97736_c4_g6,TRINITY_DN98259_c2_g3	TRINITY_DN70911_c2_g1,TRINITY_DN73145_c2_g1,TRINITY_DN73374_c1_g2,TRINITY_DN73679_c0_g1,TRINITY_DN78801_c1_g1,TRINITY_DN80373_c0_g1,TRINITY_DN86504_c0_g1,TRINITY_DN87707_c0_g1,TRINITY_DN88188_c0_g5,TRINITY_DN88748_c0_g4,TRINITY_DN89072_c1_g3,TRINITY_DN97161_c2_g1,TRINITY_DN97736_c4_g5,TRINITY_DN97736_c4_g6,TRINITY_DN98259_c2_g3
GO:0034637	cellular carbohydrate biosynthetic process	biological process	20/609	1312/93642	0.00048	0.0443124324324324	TRINITY_DN64594_c0_g1,TRINITY_DN73173_c0_g2,TRINITY_DN73944_c3_g3,TRINITY_DN77296_c1_g1,TRINITY_DN80965_c0_g4,TRINITY_DN82458_c1_g1,TRINITY_DN86425_c1_g1,TRINITY_DN89487_c0_g3,TRINITY_DN91323_c1_g5,TRINITY_DN91736_c1_g1,TRINITY_DN94345_c0_g1,TRINITY_DN94349_c0_g2,TRINITY_DN96216_c0_g1,TRINITY_DN96775_c3_g1,TRINITY_DN96892_c2_g1,TRINITY_DN97121_c1_g1,TRINITY_DN97667_c3_g2,TRINITY_DN98392_c2_g1,TRI…	TRINITY_DN64594_c0_g1,TRINITY_DN73173_c0_g2,TRINITY_DN73944_c3_g3,TRINITY_DN77296_c1_g1,TRINITY_DN80965_c0_g4,TRINITY_DN82458_c1_g1,TRINITY_DN86425_c1_g1,TRINITY_DN89487_c0_g3,TRINITY_DN91323_c1_g5,TRINITY_DN91736_c1_g1,TRINITY_DN94345_c0_g1,TRINITY_DN94349_c0_g2,TRINITY_DN96216_c0_g1,TRINITY_DN96775_c3_g1,TRINITY_DN96892_c2_g1,TRINITY_DN97121_c1_g1,TRINITY_DN97667_c3_g2,TRINITY_DN98392_c2_g1,TRI…
GO:0008299	isoprenoid biosynthetic process	biological process	14/609	750/93642	0.00049	0.0449320134228188	TRINITY_DN69416_c2_g1,TRINITY_DN70885_c1_g1,TRINITY_DN73654_c0_g1,TRINITY_DN74872_c1_g1,TRINITY_DN75228_c3_g1,TRINITY_DN77743_c0_g1,TRINITY_DN87125_c0_g3,TRINITY_DN87944_c0_g3,TRINITY_DN89072_c1_g3,TRINITY_DN92852_c0_g3,TRINITY_DN93940_c0_g3,TRINITY_DN94629_c2_g1,TRINITY_DN96650_c2_g2,TRINITY_DN98259_c2_g3	TRINITY_DN69416_c2_g1,TRINITY_DN70885_c1_g1,TRINITY_DN73654_c0_g1,TRINITY_DN74872_c1_g1,TRINITY_DN75228_c3_g1,TRINITY_DN77743_c0_g1,TRINITY_DN87125_c0_g3,TRINITY_DN87944_c0_g3,TRINITY_DN89072_c1_g3,TRINITY_DN92852_c0_g3,TRINITY_DN93940_c0_g3,TRINITY_DN94629_c2_g1,TRINITY_DN96650_c2_g2,TRINITY_DN98259_c2_g3
GO:0050793	regulation of developmental process	biological process	33/609	2713/93642	0.00054	0.0491868	TRINITY_DN68255_c0_g1,TRINITY_DN70911_c2_g1,TRINITY_DN71143_c0_g1,TRINITY_DN71424_c1_g2,TRINITY_DN73374_c1_g2,TRINITY_DN74996_c0_g1,TRINITY_DN75121_c0_g4,TRINITY_DN77296_c1_g1,TRINITY_DN78319_c0_g1,TRINITY_DN81232_c0_g1,TRINITY_DN82801_c0_g1,TRINITY_DN84175_c3_g2,TRINITY_DN84523_c1_g1,TRINITY_DN85282_c1_g2,TRINITY_DN86210_c0_g1,TRINITY_DN86425_c1_g1,TRINITY_DN86504_c0_g1,TRINITY_DN87544_c1_g3,TRI…	TRINITY_DN68255_c0_g1,TRINITY_DN70911_c2_g1,TRINITY_DN71143_c0_g1,TRINITY_DN71424_c1_g2,TRINITY_DN73374_c1_g2,TRINITY_DN74996_c0_g1,TRINITY_DN75121_c0_g4,TRINITY_DN77296_c1_g1,TRINITY_DN78319_c0_g1,TRINITY_DN81232_c0_g1,TRINITY_DN82801_c0_g1,TRINITY_DN84175_c3_g2,TRINITY_DN84523_c1_g1,TRINITY_DN85282_c1_g2,TRINITY_DN86210_c0_g1,TRINITY_DN86425_c1_g1,TRINITY_DN86504_c0_g1,TRINITY_DN87544_c1_g3,TRI…
GO:0005871	kinesin complex	cellular component	7/648	236/96716	0.00116	0.0499854545454545	TRINITY_DN80494_c0_g1,TRINITY_DN82769_c1_g2,TRINITY_DN84678_c0_g1,TRINITY_DN90122_c0_g1,TRINITY_DN92330_c1_g2,TRINITY_DN96314_c1_g1,TRINITY_DN97495_c2_g1	TRINITY_DN80494_c0_g1,TRINITY_DN82769_c1_g2,TRINITY_DN84678_c0_g1,TRINITY_DN90122_c0_g1,TRINITY_DN92330_c1_g2,TRINITY_DN96314_c1_g1,TRINITY_DN97495_c2_g1
GO:0010068	protoderm histogenesis	biological process	3/609	25/93642	0.00057	0.0515755629139073	TRINITY_DN74691_c0_g3,TRINITY_DN80004_c0_g1,TRINITY_DN95777_c4_g2	TRINITY_DN74691_c0_g3,TRINITY_DN80004_c0_g1,TRINITY_DN95777_c4_g2
GO:0032259	methylation	biological process	18/609	1135/93642	0.00058	0.0521351315789474	TRINITY_DN68255_c0_g1,TRINITY_DN70421_c0_g1,TRINITY_DN71855_c4_g2,TRINITY_DN72819_c0_g1,TRINITY_DN75121_c0_g4,TRINITY_DN80794_c0_g1,TRINITY_DN82314_c1_g2,TRINITY_DN84336_c1_g2,TRINITY_DN89410_c0_g2,TRINITY_DN91784_c1_g1,TRINITY_DN93239_c0_g2,TRINITY_DN94594_c0_g1,TRINITY_DN95775_c0_g1,TRINITY_DN96029_c2_g1,TRINITY_DN96368_c1_g3,TRINITY_DN96797_c0_g4,TRINITY_DN97461_c0_g1,TRINITY_DN97461_c0_g2	TRINITY_DN68255_c0_g1,TRINITY_DN70421_c0_g1,TRINITY_DN71855_c4_g2,TRINITY_DN72819_c0_g1,TRINITY_DN75121_c0_g4,TRINITY_DN80794_c0_g1,TRINITY_DN82314_c1_g2,TRINITY_DN84336_c1_g2,TRINITY_DN89410_c0_g2,TRINITY_DN91784_c1_g1,TRINITY_DN93239_c0_g2,TRINITY_DN94594_c0_g1,TRINITY_DN95775_c0_g1,TRINITY_DN96029_c2_g1,TRINITY_DN96368_c1_g3,TRINITY_DN96797_c0_g4,TRINITY_DN97461_c0_g1,TRINITY_DN97461_c0_g2
GO:0009698	phenylpropanoid metabolic process	biological process	11/609	511/93642	0.00061	0.0544733986928105	TRINITY_DN72281_c0_g1,TRINITY_DN72604_c1_g1,TRINITY_DN77989_c3_g2,TRINITY_DN80907_c1_g1,TRINITY_DN81440_c1_g1,TRINITY_DN81857_c0_g1,TRINITY_DN81857_c0_g3,TRINITY_DN85704_c1_g3,TRINITY_DN89152_c2_g1,TRINITY_DN95201_c2_g4,TRINITY_DN98228_c0_g1	TRINITY_DN72281_c0_g1,TRINITY_DN72604_c1_g1,TRINITY_DN77989_c3_g2,TRINITY_DN80907_c1_g1,TRINITY_DN81440_c1_g1,TRINITY_DN81857_c0_g1,TRINITY_DN81857_c0_g3,TRINITY_DN85704_c1_g3,TRINITY_DN89152_c2_g1,TRINITY_DN95201_c2_g4,TRINITY_DN98228_c0_g1
GO:0016746	transferase activity, transferring acyl groups	molecular function	33/669	2564/102170	0.00024	0.05526	TRINITY_DN68792_c0_g1,TRINITY_DN71807_c0_g2,TRINITY_DN74648_c0_g1,TRINITY_DN74697_c0_g6,TRINITY_DN75021_c0_g3,TRINITY_DN78319_c0_g1,TRINITY_DN79340_c0_g3,TRINITY_DN79849_c1_g1,TRINITY_DN81502_c0_g2,TRINITY_DN82435_c2_g4,TRINITY_DN82528_c0_g1,TRINITY_DN82775_c4_g1,TRINITY_DN83047_c1_g1,TRINITY_DN83600_c0_g1,TRINITY_DN85885_c3_g1,TRINITY_DN86405_c1_g1,TRINITY_DN89072_c1_g3,TRINITY_DN89087_c0_g1,TRI…	TRINITY_DN68792_c0_g1,TRINITY_DN71807_c0_g2,TRINITY_DN74648_c0_g1,TRINITY_DN74697_c0_g6,TRINITY_DN75021_c0_g3,TRINITY_DN78319_c0_g1,TRINITY_DN79340_c0_g3,TRINITY_DN79849_c1_g1,TRINITY_DN81502_c0_g2,TRINITY_DN82435_c2_g4,TRINITY_DN82528_c0_g1,TRINITY_DN82775_c4_g1,TRINITY_DN83047_c1_g1,TRINITY_DN83600_c0_g1,TRINITY_DN85885_c3_g1,TRINITY_DN86405_c1_g1,TRINITY_DN89072_c1_g3,TRINITY_DN89087_c0_g1,TRI…
GO:0004549	tRNA-specific ribonuclease activity	molecular function	6/669	133/102170	0.00026	0.0565159090909091	TRINITY_DN70421_c0_g1,TRINITY_DN71889_c1_g1,TRINITY_DN73444_c1_g3,TRINITY_DN74503_c1_g2,TRINITY_DN80794_c0_g1,TRINITY_DN83048_c1_g1	TRINITY_DN70421_c0_g1,TRINITY_DN71889_c1_g1,TRINITY_DN73444_c1_g3,TRINITY_DN74503_c1_g2,TRINITY_DN80794_c0_g1,TRINITY_DN83048_c1_g1
GO:0034212	peptide N-acetyltransferase activity	molecular function	7/669	188/102170	0.00027	0.0565159090909091	TRINITY_DN83047_c1_g1,TRINITY_DN91545_c0_g4,TRINITY_DN94399_c1_g1,TRINITY_DN96368_c1_g3,TRINITY_DN96797_c0_g4,TRINITY_DN97461_c0_g1,TRINITY_DN97461_c0_g2	TRINITY_DN83047_c1_g1,TRINITY_DN91545_c0_g4,TRINITY_DN94399_c1_g1,TRINITY_DN96368_c1_g3,TRINITY_DN96797_c0_g4,TRINITY_DN97461_c0_g1,TRINITY_DN97461_c0_g2
GO:0010605	negative regulation of macromolecule metabolic process	biological process	42/609	3783/93642	0.00065	0.0565665605095541	TRINITY_DN70421_c0_g1,TRINITY_DN70723_c1_g1,TRINITY_DN71424_c1_g2,TRINITY_DN71889_c1_g1,TRINITY_DN72819_c0_g1,TRINITY_DN73324_c3_g1,TRINITY_DN73444_c1_g3,TRINITY_DN73493_c1_g1,TRINITY_DN74503_c1_g2,TRINITY_DN74568_c0_g3,TRINITY_DN78805_c1_g1,TRINITY_DN80370_c4_g5,TRINITY_DN80794_c0_g1,TRINITY_DN83047_c1_g1,TRINITY_DN83048_c1_g1,TRINITY_DN84296_c1_g1,TRINITY_DN84336_c1_g2,TRINITY_DN84842_c1_g1,TRI…	TRINITY_DN70421_c0_g1,TRINITY_DN70723_c1_g1,TRINITY_DN71424_c1_g2,TRINITY_DN71889_c1_g1,TRINITY_DN72819_c0_g1,TRINITY_DN73324_c3_g1,TRINITY_DN73444_c1_g3,TRINITY_DN73493_c1_g1,TRINITY_DN74503_c1_g2,TRINITY_DN74568_c0_g3,TRINITY_DN78805_c1_g1,TRINITY_DN80370_c4_g5,TRINITY_DN80794_c0_g1,TRINITY_DN83047_c1_g1,TRINITY_DN83048_c1_g1,TRINITY_DN84296_c1_g1,TRINITY_DN84336_c1_g2,TRINITY_DN84842_c1_g1,TRI…
GO:0006556	S-adenosylmethionine biosynthetic process	biological process	4/609	60/93642	0.00065	0.0565665605095541	TRINITY_DN70805_c2_g2,TRINITY_DN70805_c2_g3,TRINITY_DN71291_c1_g1,TRINITY_DN74847_c0_g1	TRINITY_DN70805_c2_g2,TRINITY_DN70805_c2_g3,TRINITY_DN71291_c1_g1,TRINITY_DN74847_c0_g1
GO:0010050	vegetative phase change	biological process	4/609	60/93642	0.00065	0.0565665605095541	TRINITY_DN71889_c1_g1,TRINITY_DN74503_c1_g2,TRINITY_DN90620_c1_g1,TRINITY_DN91758_c3_g4	TRINITY_DN71889_c1_g1,TRINITY_DN74503_c1_g2,TRINITY_DN90620_c1_g1,TRINITY_DN91758_c3_g4
GO:0009892	negative regulation of metabolic process	biological process	44/609	4021/93642	0.00065	0.0565665605095541	TRINITY_DN70421_c0_g1,TRINITY_DN70723_c1_g1,TRINITY_DN71424_c1_g2,TRINITY_DN71889_c1_g1,TRINITY_DN72819_c0_g1,TRINITY_DN73324_c3_g1,TRINITY_DN73444_c1_g3,TRINITY_DN73493_c1_g1,TRINITY_DN74503_c1_g2,TRINITY_DN74568_c0_g3,TRINITY_DN78805_c1_g1,TRINITY_DN80370_c4_g5,TRINITY_DN80794_c0_g1,TRINITY_DN83047_c1_g1,TRINITY_DN83048_c1_g1,TRINITY_DN84296_c1_g1,TRINITY_DN84336_c1_g2,TRINITY_DN84842_c1_g1,TRI…	TRINITY_DN70421_c0_g1,TRINITY_DN70723_c1_g1,TRINITY_DN71424_c1_g2,TRINITY_DN71889_c1_g1,TRINITY_DN72819_c0_g1,TRINITY_DN73324_c3_g1,TRINITY_DN73444_c1_g3,TRINITY_DN73493_c1_g1,TRINITY_DN74503_c1_g2,TRINITY_DN74568_c0_g3,TRINITY_DN78805_c1_g1,TRINITY_DN80370_c4_g5,TRINITY_DN80794_c0_g1,TRINITY_DN83047_c1_g1,TRINITY_DN83048_c1_g1,TRINITY_DN84296_c1_g1,TRINITY_DN84336_c1_g2,TRINITY_DN84842_c1_g1,TRI…
GO:0046429	4-hydroxy-3-methylbut-2-en-1-yl diphosphate synthase activity	molecular function	3/669	20/102170	0.00029	0.0580630434782609	TRINITY_DN75228_c3_g1,TRINITY_DN87125_c0_g3,TRINITY_DN93940_c0_g3	TRINITY_DN75228_c3_g1,TRINITY_DN87125_c0_g3,TRINITY_DN93940_c0_g3
GO:0042023	DNA endoreduplication	biological process	5/609	106/93642	0.00068	0.0584329559748428	TRINITY_DN73145_c2_g1,TRINITY_DN80373_c0_g1,TRINITY_DN97736_c4_g5,TRINITY_DN97736_c4_g6,TRINITY_DN98683_c5_g1	TRINITY_DN73145_c2_g1,TRINITY_DN80373_c0_g1,TRINITY_DN97736_c4_g5,TRINITY_DN97736_c4_g6,TRINITY_DN98683_c5_g1
GO:0016114	terpenoid biosynthetic process	biological process	11/609	518/93642	0.00068	0.0584329559748428	TRINITY_DN69416_c2_g1,TRINITY_DN70885_c1_g1,TRINITY_DN73654_c0_g1,TRINITY_DN74872_c1_g1,TRINITY_DN75228_c3_g1,TRINITY_DN77743_c0_g1,TRINITY_DN87944_c0_g3,TRINITY_DN92852_c0_g3,TRINITY_DN93940_c0_g3,TRINITY_DN94629_c2_g1,TRINITY_DN96650_c2_g2	TRINITY_DN69416_c2_g1,TRINITY_DN70885_c1_g1,TRINITY_DN73654_c0_g1,TRINITY_DN74872_c1_g1,TRINITY_DN75228_c3_g1,TRINITY_DN77743_c0_g1,TRINITY_DN87944_c0_g3,TRINITY_DN92852_c0_g3,TRINITY_DN93940_c0_g3,TRINITY_DN94629_c2_g1,TRINITY_DN96650_c2_g2
GO:0034654	nucleobase-containing compound biosynthetic process	biological process	116/609	13382/93642	0.00071	0.0606295625	TRINITY_DN66987_c0_g1,TRINITY_DN68255_c0_g1,TRINITY_DN68532_c1_g1,TRINITY_DN70026_c1_g2,TRINITY_DN70156_c0_g5,TRINITY_DN70487_c0_g1,TRINITY_DN70831_c1_g2,TRINITY_DN71424_c1_g2,TRINITY_DN71554_c0_g1,TRINITY_DN71558_c1_g1,TRINITY_DN71855_c4_g2,TRINITY_DN72819_c0_g1,TRINITY_DN74568_c0_g3,TRINITY_DN74697_c0_g6,TRINITY_DN76045_c0_g1,TRINITY_DN76917_c3_g1,TRINITY_DN77126_c1_g2,TRINITY_DN77126_c1_g3,TRI…	TRINITY_DN66987_c0_g1,TRINITY_DN68255_c0_g1,TRINITY_DN68532_c1_g1,TRINITY_DN70026_c1_g2,TRINITY_DN70156_c0_g5,TRINITY_DN70487_c0_g1,TRINITY_DN70831_c1_g2,TRINITY_DN71424_c1_g2,TRINITY_DN71554_c0_g1,TRINITY_DN71558_c1_g1,TRINITY_DN71855_c4_g2,TRINITY_DN72819_c0_g1,TRINITY_DN74568_c0_g3,TRINITY_DN74697_c0_g6,TRINITY_DN76045_c0_g1,TRINITY_DN76917_c3_g1,TRINITY_DN77126_c1_g2,TRINITY_DN77126_c1_g3,TRI…
GO:0048046	apoplast	cellular component	15/648	914/96716	0.00154	0.0648853333333333	TRINITY_DN69571_c1_g1,TRINITY_DN72281_c0_g1,TRINITY_DN74461_c0_g1,TRINITY_DN79475_c1_g2,TRINITY_DN81660_c3_g2,TRINITY_DN84083_c0_g2,TRINITY_DN84445_c0_g3,TRINITY_DN87713_c1_g2,TRINITY_DN91503_c0_g3,TRINITY_DN95067_c0_g2,TRINITY_DN95511_c3_g4,TRINITY_DN95651_c1_g3,TRINITY_DN96045_c0_g1,TRINITY_DN96097_c3_g2,TRINITY_DN96097_c3_g4	TRINITY_DN69571_c1_g1,TRINITY_DN72281_c0_g1,TRINITY_DN74461_c0_g1,TRINITY_DN79475_c1_g2,TRINITY_DN81660_c3_g2,TRINITY_DN84083_c0_g2,TRINITY_DN84445_c0_g3,TRINITY_DN87713_c1_g2,TRINITY_DN91503_c0_g3,TRINITY_DN95067_c0_g2,TRINITY_DN95511_c3_g4,TRINITY_DN95651_c1_g3,TRINITY_DN96045_c0_g1,TRINITY_DN96097_c3_g2,TRINITY_DN96097_c3_g4
GO:0016070	RNA metabolic process	biological process	138/609	16446/93642	0.00077	0.0653447826086957	TRINITY_DN63286_c0_g1,TRINITY_DN66987_c0_g1,TRINITY_DN68255_c0_g1,TRINITY_DN68532_c1_g1,TRINITY_DN68647_c0_g1,TRINITY_DN70026_c1_g2,TRINITY_DN70156_c0_g5,TRINITY_DN70421_c0_g1,TRINITY_DN70487_c0_g1,TRINITY_DN70723_c1_g1,TRINITY_DN70831_c1_g2,TRINITY_DN71424_c1_g2,TRINITY_DN71554_c0_g1,TRINITY_DN71558_c1_g1,TRINITY_DN71855_c4_g2,TRINITY_DN71889_c1_g1,TRINITY_DN72819_c0_g1,TRINITY_DN73324_c3_g1,TRI…	TRINITY_DN63286_c0_g1,TRINITY_DN66987_c0_g1,TRINITY_DN68255_c0_g1,TRINITY_DN68532_c1_g1,TRINITY_DN68647_c0_g1,TRINITY_DN70026_c1_g2,TRINITY_DN70156_c0_g5,TRINITY_DN70421_c0_g1,TRINITY_DN70487_c0_g1,TRINITY_DN70723_c1_g1,TRINITY_DN70831_c1_g2,TRINITY_DN71424_c1_g2,TRINITY_DN71554_c0_g1,TRINITY_DN71558_c1_g1,TRINITY_DN71855_c4_g2,TRINITY_DN71889_c1_g1,TRINITY_DN72819_c0_g1,TRINITY_DN73324_c3_g1,TRI…
GO:0009956	radial pattern formation	biological process	4/609	63/93642	0.00078	0.0657848148148148	TRINITY_DN70156_c0_g5,TRINITY_DN70487_c0_g1,TRINITY_DN88078_c1_g2,TRINITY_DN97262_c0_g2	TRINITY_DN70156_c0_g5,TRINITY_DN70487_c0_g1,TRINITY_DN88078_c1_g2,TRINITY_DN97262_c0_g2
GO:0020037	heme binding	molecular function	32/669	2519/102170	0.00036	0.0673038461538462	TRINITY_DN68475_c0_g1,TRINITY_DN68475_c0_g3,TRINITY_DN70599_c1_g1,TRINITY_DN70599_c1_g3,TRINITY_DN70885_c1_g1,TRINITY_DN72866_c0_g3,TRINITY_DN74684_c0_g2,TRINITY_DN77442_c1_g3,TRINITY_DN78453_c0_g1,TRINITY_DN79594_c1_g2,TRINITY_DN80065_c0_g3,TRINITY_DN80284_c2_g1,TRINITY_DN80835_c0_g1,TRINITY_DN83616_c0_g4,TRINITY_DN84104_c2_g4,TRINITY_DN86350_c0_g1,TRINITY_DN86350_c0_g2,TRINITY_DN89775_c2_g5,TRI…	TRINITY_DN68475_c0_g1,TRINITY_DN68475_c0_g3,TRINITY_DN70599_c1_g1,TRINITY_DN70599_c1_g3,TRINITY_DN70885_c1_g1,TRINITY_DN72866_c0_g3,TRINITY_DN74684_c0_g2,TRINITY_DN77442_c1_g3,TRINITY_DN78453_c0_g1,TRINITY_DN79594_c1_g2,TRINITY_DN80065_c0_g3,TRINITY_DN80284_c2_g1,TRINITY_DN80835_c0_g1,TRINITY_DN83616_c0_g4,TRINITY_DN84104_c2_g4,TRINITY_DN86350_c0_g1,TRINITY_DN86350_c0_g2,TRINITY_DN89775_c2_g5,TRI…
GO:0003677	DNA binding	molecular function	92/669	9860/102170	0.00038	0.0673038461538462	TRINITY_DN68224_c1_g5,TRINITY_DN68532_c1_g1,TRINITY_DN70026_c1_g2,TRINITY_DN70156_c0_g5,TRINITY_DN70487_c0_g1,TRINITY_DN70626_c0_g2,TRINITY_DN70725_c1_g7,TRINITY_DN70831_c1_g2,TRINITY_DN73324_c3_g1,TRINITY_DN74712_c0_g1,TRINITY_DN76045_c0_g1,TRINITY_DN76917_c3_g1,TRINITY_DN77126_c1_g2,TRINITY_DN77126_c1_g3,TRINITY_DN79655_c1_g1,TRINITY_DN80370_c4_g5,TRINITY_DN80415_c0_g1,TRINITY_DN80520_c0_g1,TRI…	TRINITY_DN68224_c1_g5,TRINITY_DN68532_c1_g1,TRINITY_DN70026_c1_g2,TRINITY_DN70156_c0_g5,TRINITY_DN70487_c0_g1,TRINITY_DN70626_c0_g2,TRINITY_DN70725_c1_g7,TRINITY_DN70831_c1_g2,TRINITY_DN73324_c3_g1,TRINITY_DN74712_c0_g1,TRINITY_DN76045_c0_g1,TRINITY_DN76917_c3_g1,TRINITY_DN77126_c1_g2,TRINITY_DN77126_c1_g3,TRINITY_DN79655_c1_g1,TRINITY_DN80370_c4_g5,TRINITY_DN80415_c0_g1,TRINITY_DN80520_c0_g1,TRI…
GO:0052742	phosphatidylinositol kinase activity	molecular function	5/669	93/102170	0.00038	0.0673038461538462	TRINITY_DN74815_c2_g1,TRINITY_DN76839_c0_g1,TRINITY_DN88395_c3_g2,TRINITY_DN97232_c2_g1,TRINITY_DN99055_c10_g1	TRINITY_DN74815_c2_g1,TRINITY_DN76839_c0_g1,TRINITY_DN88395_c3_g2,TRINITY_DN97232_c2_g1,TRINITY_DN99055_c10_g1
GO:1902275	regulation of chromatin organization	biological process	9/609	370/93642	0.00081	0.0678958895705521	TRINITY_DN72819_c0_g1,TRINITY_DN75121_c0_g4,TRINITY_DN83047_c1_g1,TRINITY_DN89410_c0_g2,TRINITY_DN91545_c0_g4,TRINITY_DN91784_c1_g1,TRINITY_DN93239_c0_g2,TRINITY_DN93339_c1_g1,TRINITY_DN95775_c0_g1	TRINITY_DN72819_c0_g1,TRINITY_DN75121_c0_g4,TRINITY_DN83047_c1_g1,TRINITY_DN89410_c0_g2,TRINITY_DN91545_c0_g4,TRINITY_DN91784_c1_g1,TRINITY_DN93239_c0_g2,TRINITY_DN93339_c1_g1,TRINITY_DN95775_c0_g1
GO:0016747	transferase activity, transferring acyl groups other than amino-acyl groups	molecular function	28/669	2103/102170	0.00041	0.0699277777777778	TRINITY_DN68792_c0_g1,TRINITY_DN71807_c0_g2,TRINITY_DN74697_c0_g6,TRINITY_DN75021_c0_g3,TRINITY_DN79340_c0_g3,TRINITY_DN79849_c1_g1,TRINITY_DN81502_c0_g2,TRINITY_DN82435_c2_g4,TRINITY_DN82528_c0_g1,TRINITY_DN82775_c4_g1,TRINITY_DN83047_c1_g1,TRINITY_DN85885_c3_g1,TRINITY_DN86405_c1_g1,TRINITY_DN89072_c1_g3,TRINITY_DN90788_c0_g2,TRINITY_DN91372_c0_g4,TRINITY_DN91545_c0_g4,TRINITY_DN93699_c0_g1,TRI…	TRINITY_DN68792_c0_g1,TRINITY_DN71807_c0_g2,TRINITY_DN74697_c0_g6,TRINITY_DN75021_c0_g3,TRINITY_DN79340_c0_g3,TRINITY_DN79849_c1_g1,TRINITY_DN81502_c0_g2,TRINITY_DN82435_c2_g4,TRINITY_DN82528_c0_g1,TRINITY_DN82775_c4_g1,TRINITY_DN83047_c1_g1,TRINITY_DN85885_c3_g1,TRINITY_DN86405_c1_g1,TRINITY_DN89072_c1_g3,TRINITY_DN90788_c0_g2,TRINITY_DN91372_c0_g4,TRINITY_DN91545_c0_g4,TRINITY_DN93699_c0_g1,TRI…
GO:0042752	regulation of circadian rhythm	biological process	6/609	167/93642	0.00084	0.0699812195121951	TRINITY_DN84175_c3_g2,TRINITY_DN84523_c1_g1,TRINITY_DN87544_c1_g3,TRINITY_DN93948_c1_g2,TRINITY_DN97143_c3_g2,TRINITY_DN97143_c3_g3	TRINITY_DN84175_c3_g2,TRINITY_DN84523_c1_g1,TRINITY_DN87544_c1_g3,TRINITY_DN93948_c1_g2,TRINITY_DN97143_c3_g2,TRINITY_DN97143_c3_g3
GO:0071695	anatomical structure maturation	biological process	10/609	451/93642	0.00085	0.0703851515151515	TRINITY_DN73679_c0_g1,TRINITY_DN75340_c0_g2,TRINITY_DN75340_c0_g3,TRINITY_DN82761_c1_g1,TRINITY_DN85282_c1_g2,TRINITY_DN92690_c1_g1,TRINITY_DN92972_c1_g1,TRINITY_DN96030_c0_g1,TRINITY_DN97471_c1_g1,TRINITY_DN97936_c1_g1	TRINITY_DN73679_c0_g1,TRINITY_DN75340_c0_g2,TRINITY_DN75340_c0_g3,TRINITY_DN82761_c1_g1,TRINITY_DN85282_c1_g2,TRINITY_DN92690_c1_g1,TRINITY_DN92972_c1_g1,TRINITY_DN96030_c0_g1,TRINITY_DN97471_c1_g1,TRINITY_DN97936_c1_g1
GO:0042393	histone binding	molecular function	8/669	268/102170	0.00044	0.0714568965517241	TRINITY_DN83047_c1_g1,TRINITY_DN91545_c0_g4,TRINITY_DN91784_c1_g1,TRINITY_DN93239_c0_g2,TRINITY_DN96368_c1_g3,TRINITY_DN96797_c0_g4,TRINITY_DN97461_c0_g1,TRINITY_DN97461_c0_g2	TRINITY_DN83047_c1_g1,TRINITY_DN91545_c0_g4,TRINITY_DN91784_c1_g1,TRINITY_DN93239_c0_g2,TRINITY_DN96368_c1_g3,TRINITY_DN96797_c0_g4,TRINITY_DN97461_c0_g1,TRINITY_DN97461_c0_g2
GO:0052592	oxidoreductase activity, acting on CH or CH2 groups, with an iron-sulfur protein as acceptor	molecular function	3/669	23/102170	0.00045	0.0714568965517241	TRINITY_DN75228_c3_g1,TRINITY_DN87125_c0_g3,TRINITY_DN93940_c0_g3	TRINITY_DN75228_c3_g1,TRINITY_DN87125_c0_g3,TRINITY_DN93940_c0_g3
GO:0010016	shoot system morphogenesis	biological process	10/609	455/93642	0.00091	0.074899578313253	TRINITY_DN68079_c0_g2,TRINITY_DN74872_c1_g1,TRINITY_DN75121_c0_g4,TRINITY_DN80884_c0_g1,TRINITY_DN83047_c1_g1,TRINITY_DN91545_c0_g4,TRINITY_DN95511_c3_g4,TRINITY_DN98191_c1_g2,TRINITY_DN98453_c1_g1,TRINITY_DN98595_c1_g3	TRINITY_DN68079_c0_g2,TRINITY_DN74872_c1_g1,TRINITY_DN75121_c0_g4,TRINITY_DN80884_c0_g1,TRINITY_DN83047_c1_g1,TRINITY_DN91545_c0_g4,TRINITY_DN95511_c3_g4,TRINITY_DN98191_c1_g2,TRINITY_DN98453_c1_g1,TRINITY_DN98595_c1_g3
GO:0010090	trichome morphogenesis	biological process	6/609	170/93642	0.00092	0.0752692215568862	TRINITY_DN73145_c2_g1,TRINITY_DN73679_c0_g1,TRINITY_DN78801_c1_g1,TRINITY_DN80373_c0_g1,TRINITY_DN97736_c4_g5,TRINITY_DN97736_c4_g6	TRINITY_DN73145_c2_g1,TRINITY_DN73679_c0_g1,TRINITY_DN78801_c1_g1,TRINITY_DN80373_c0_g1,TRINITY_DN97736_c4_g5,TRINITY_DN97736_c4_g6
GO:0003777	microtubule motor activity	molecular function	9/669	345/102170	0.00052	0.0758470588235294	TRINITY_DN80494_c0_g1,TRINITY_DN82769_c1_g2,TRINITY_DN84678_c0_g1,TRINITY_DN90122_c0_g1,TRINITY_DN92330_c1_g2,TRINITY_DN92678_c1_g2,TRINITY_DN96314_c1_g1,TRINITY_DN97495_c2_g1,TRINITY_DN98277_c2_g1	TRINITY_DN80494_c0_g1,TRINITY_DN82769_c1_g2,TRINITY_DN84678_c0_g1,TRINITY_DN90122_c0_g1,TRINITY_DN92330_c1_g2,TRINITY_DN92678_c1_g2,TRINITY_DN96314_c1_g1,TRINITY_DN97495_c2_g1,TRINITY_DN98277_c2_g1
GO:0004478	methionine adenosyltransferase activity	molecular function	4/669	57/102170	0.00055	0.0758470588235294	TRINITY_DN70805_c2_g2,TRINITY_DN70805_c2_g3,TRINITY_DN71291_c1_g1,TRINITY_DN74847_c0_g1	TRINITY_DN70805_c2_g2,TRINITY_DN70805_c2_g3,TRINITY_DN71291_c1_g1,TRINITY_DN74847_c0_g1
GO:0008184	glycogen phosphorylase activity	molecular function	4/669	57/102170	0.00055	0.0758470588235294	TRINITY_DN82502_c0_g1,TRINITY_DN82502_c0_g3,TRINITY_DN97884_c2_g3,TRINITY_DN97884_c2_g6	TRINITY_DN82502_c0_g1,TRINITY_DN82502_c0_g3,TRINITY_DN97884_c2_g3,TRINITY_DN97884_c2_g6
GO:0034062	5'-3' RNA polymerase activity	molecular function	12/669	583/102170	0.00056	0.0758470588235294	TRINITY_DN73493_c1_g1,TRINITY_DN78805_c1_g1,TRINITY_DN80520_c0_g1,TRINITY_DN81461_c0_g3,TRINITY_DN84296_c1_g1,TRINITY_DN84336_c1_g2,TRINITY_DN86371_c0_g2,TRINITY_DN88508_c2_g1,TRINITY_DN89002_c0_g1,TRINITY_DN91297_c0_g1,TRINITY_DN95530_c0_g1,TRINITY_DN98764_c5_g3	TRINITY_DN73493_c1_g1,TRINITY_DN78805_c1_g1,TRINITY_DN80520_c0_g1,TRINITY_DN81461_c0_g3,TRINITY_DN84296_c1_g1,TRINITY_DN84336_c1_g2,TRINITY_DN86371_c0_g2,TRINITY_DN88508_c2_g1,TRINITY_DN89002_c0_g1,TRINITY_DN91297_c0_g1,TRINITY_DN95530_c0_g1,TRINITY_DN98764_c5_g3
GO:0097747	RNA polymerase activity	molecular function	12/669	583/102170	0.00056	0.0758470588235294	TRINITY_DN73493_c1_g1,TRINITY_DN78805_c1_g1,TRINITY_DN80520_c0_g1,TRINITY_DN81461_c0_g3,TRINITY_DN84296_c1_g1,TRINITY_DN84336_c1_g2,TRINITY_DN86371_c0_g2,TRINITY_DN88508_c2_g1,TRINITY_DN89002_c0_g1,TRINITY_DN91297_c0_g1,TRINITY_DN95530_c0_g1,TRINITY_DN98764_c5_g3	TRINITY_DN73493_c1_g1,TRINITY_DN78805_c1_g1,TRINITY_DN80520_c0_g1,TRINITY_DN81461_c0_g3,TRINITY_DN84296_c1_g1,TRINITY_DN84336_c1_g2,TRINITY_DN86371_c0_g2,TRINITY_DN88508_c2_g1,TRINITY_DN89002_c0_g1,TRINITY_DN91297_c0_g1,TRINITY_DN95530_c0_g1,TRINITY_DN98764_c5_g3
GO:0090696	post-embryonic plant organ development	biological process	10/609	457/93642	0.00094	0.0764477380952381	TRINITY_DN73679_c1_g2,TRINITY_DN75411_c0_g3,TRINITY_DN76045_c0_g1,TRINITY_DN82801_c0_g1,TRINITY_DN87261_c0_g2,TRINITY_DN88748_c0_g4,TRINITY_DN92488_c0_g1,TRINITY_DN94649_c0_g3,TRINITY_DN95125_c2_g1,TRINITY_DN96030_c0_g1	TRINITY_DN73679_c1_g2,TRINITY_DN75411_c0_g3,TRINITY_DN76045_c0_g1,TRINITY_DN82801_c0_g1,TRINITY_DN87261_c0_g2,TRINITY_DN88748_c0_g4,TRINITY_DN92488_c0_g1,TRINITY_DN94649_c0_g3,TRINITY_DN95125_c2_g1,TRINITY_DN96030_c0_g1
GO:0016020	membrane	cellular component	321/648	42377/96716	0.00189	0.0779008695652174	TRINITY_DN64594_c0_g1,TRINITY_DN66768_c0_g1,TRINITY_DN67158_c0_g1,TRINITY_DN67271_c0_g1,TRINITY_DN68079_c0_g2,TRINITY_DN68224_c1_g5,TRINITY_DN68475_c0_g1,TRINITY_DN68475_c0_g3,TRINITY_DN68749_c0_g1,TRINITY_DN68792_c0_g1,TRINITY_DN68838_c0_g1,TRINITY_DN69416_c2_g1,TRINITY_DN69571_c1_g1,TRINITY_DN69671_c1_g2,TRINITY_DN69726_c2_g1,TRINITY_DN70584_c0_g4,TRINITY_DN70599_c1_g1,TRINITY_DN70599_c1_g3,TRI…	TRINITY_DN64594_c0_g1,TRINITY_DN66768_c0_g1,TRINITY_DN67158_c0_g1,TRINITY_DN67271_c0_g1,TRINITY_DN68079_c0_g2,TRINITY_DN68224_c1_g5,TRINITY_DN68475_c0_g1,TRINITY_DN68475_c0_g3,TRINITY_DN68749_c0_g1,TRINITY_DN68792_c0_g1,TRINITY_DN68838_c0_g1,TRINITY_DN69416_c2_g1,TRINITY_DN69571_c1_g1,TRINITY_DN69671_c1_g2,TRINITY_DN69726_c2_g1,TRINITY_DN70584_c0_g4,TRINITY_DN70599_c1_g1,TRINITY_DN70599_c1_g3,TRI…
GO:0009902	chloroplast relocation	biological process	4/609	67/93642	0.00098	0.0783025730994152	TRINITY_DN80494_c0_g1,TRINITY_DN87488_c0_g6,TRINITY_DN91033_c2_g2,TRINITY_DN97495_c2_g1	TRINITY_DN80494_c0_g1,TRINITY_DN87488_c0_g6,TRINITY_DN91033_c2_g2,TRINITY_DN97495_c2_g1
GO:0051667	establishment of plastid localization	biological process	4/609	67/93642	0.00098	0.0783025730994152	TRINITY_DN80494_c0_g1,TRINITY_DN87488_c0_g6,TRINITY_DN91033_c2_g2,TRINITY_DN97495_c2_g1	TRINITY_DN80494_c0_g1,TRINITY_DN87488_c0_g6,TRINITY_DN91033_c2_g2,TRINITY_DN97495_c2_g1
GO:0097054	L-glutamate biosynthetic process	biological process	4/609	67/93642	0.00098	0.0783025730994152	TRINITY_DN79475_c1_g2,TRINITY_DN81308_c1_g1,TRINITY_DN96037_c1_g1,TRINITY_DN96704_c2_g2	TRINITY_DN79475_c1_g2,TRINITY_DN81308_c1_g1,TRINITY_DN96037_c1_g1,TRINITY_DN96704_c2_g2
GO:0009534	chloroplast thylakoid	cellular component	14/648	845/96716	0.00200	0.079	TRINITY_DN74697_c0_g6,TRINITY_DN74712_c0_g1,TRINITY_DN81660_c3_g2,TRINITY_DN85213_c0_g1,TRINITY_DN86969_c1_g2,TRINITY_DN89209_c2_g1,TRINITY_DN89214_c0_g1,TRINITY_DN91033_c2_g2,TRINITY_DN92690_c1_g1,TRINITY_DN92852_c0_g3,TRINITY_DN94476_c1_g1,TRINITY_DN96139_c1_g1,TRINITY_DN97001_c2_g2,TRINITY_DN97445_c4_g1	TRINITY_DN74697_c0_g6,TRINITY_DN74712_c0_g1,TRINITY_DN81660_c3_g2,TRINITY_DN85213_c0_g1,TRINITY_DN86969_c1_g2,TRINITY_DN89209_c2_g1,TRINITY_DN89214_c0_g1,TRINITY_DN91033_c2_g2,TRINITY_DN92690_c1_g1,TRINITY_DN92852_c0_g3,TRINITY_DN94476_c1_g1,TRINITY_DN96139_c1_g1,TRINITY_DN97001_c2_g2,TRINITY_DN97445_c4_g1
GO:0031976	plastid thylakoid	cellular component	14/648	845/96716	0.00200	0.079	TRINITY_DN74697_c0_g6,TRINITY_DN74712_c0_g1,TRINITY_DN81660_c3_g2,TRINITY_DN85213_c0_g1,TRINITY_DN86969_c1_g2,TRINITY_DN89209_c2_g1,TRINITY_DN89214_c0_g1,TRINITY_DN91033_c2_g2,TRINITY_DN92690_c1_g1,TRINITY_DN92852_c0_g3,TRINITY_DN94476_c1_g1,TRINITY_DN96139_c1_g1,TRINITY_DN97001_c2_g2,TRINITY_DN97445_c4_g1	TRINITY_DN74697_c0_g6,TRINITY_DN74712_c0_g1,TRINITY_DN81660_c3_g2,TRINITY_DN85213_c0_g1,TRINITY_DN86969_c1_g2,TRINITY_DN89209_c2_g1,TRINITY_DN89214_c0_g1,TRINITY_DN91033_c2_g2,TRINITY_DN92690_c1_g1,TRINITY_DN92852_c0_g3,TRINITY_DN94476_c1_g1,TRINITY_DN96139_c1_g1,TRINITY_DN97001_c2_g2,TRINITY_DN97445_c4_g1
GO:0048583	regulation of response to stimulus	biological process	38/609	3399/93642	0.00102	0.0810247674418605	TRINITY_DN68434_c0_g1,TRINITY_DN72819_c0_g1,TRINITY_DN72989_c0_g1,TRINITY_DN73130_c0_g1,TRINITY_DN73444_c1_g3,TRINITY_DN74096_c1_g1,TRINITY_DN74568_c0_g3,TRINITY_DN74996_c0_g1,TRINITY_DN75121_c0_g4,TRINITY_DN82769_c1_g2,TRINITY_DN83048_c1_g1,TRINITY_DN84523_c1_g1,TRINITY_DN84678_c0_g1,TRINITY_DN85282_c1_g2,TRINITY_DN85980_c1_g1,TRINITY_DN87544_c1_g3,TRINITY_DN88188_c0_g5,TRINITY_DN89410_c0_g2,TRI…	TRINITY_DN68434_c0_g1,TRINITY_DN72819_c0_g1,TRINITY_DN72989_c0_g1,TRINITY_DN73130_c0_g1,TRINITY_DN73444_c1_g3,TRINITY_DN74096_c1_g1,TRINITY_DN74568_c0_g3,TRINITY_DN74996_c0_g1,TRINITY_DN75121_c0_g4,TRINITY_DN82769_c1_g2,TRINITY_DN83048_c1_g1,TRINITY_DN84523_c1_g1,TRINITY_DN84678_c0_g1,TRINITY_DN85282_c1_g2,TRINITY_DN85980_c1_g1,TRINITY_DN87544_c1_g3,TRINITY_DN88188_c0_g5,TRINITY_DN89410_c0_g2,TRI…
GO:0019750	chloroplast localization	biological process	4/609	68/93642	0.00104	0.081663908045977	TRINITY_DN80494_c0_g1,TRINITY_DN87488_c0_g6,TRINITY_DN91033_c2_g2,TRINITY_DN97495_c2_g1	TRINITY_DN80494_c0_g1,TRINITY_DN87488_c0_g6,TRINITY_DN91033_c2_g2,TRINITY_DN97495_c2_g1
GO:0051644	plastid localization	biological process	4/609	68/93642	0.00104	0.081663908045977	TRINITY_DN80494_c0_g1,TRINITY_DN87488_c0_g6,TRINITY_DN91033_c2_g2,TRINITY_DN97495_c2_g1	TRINITY_DN80494_c0_g1,TRINITY_DN87488_c0_g6,TRINITY_DN91033_c2_g2,TRINITY_DN97495_c2_g1
GO:0009744	response to sucrose	biological process	5/609	117/93642	0.00105	0.081978	TRINITY_DN76380_c0_g1,TRINITY_DN79475_c1_g2,TRINITY_DN86210_c0_g1,TRINITY_DN93943_c0_g3,TRINITY_DN95327_c1_g1	TRINITY_DN76380_c0_g1,TRINITY_DN79475_c1_g2,TRINITY_DN86210_c0_g1,TRINITY_DN93943_c0_g3,TRINITY_DN95327_c1_g1
GO:0000281	mitotic cytokinesis	biological process	13/609	723/93642	0.00108	0.0838411363636364	TRINITY_DN64594_c0_g1,TRINITY_DN73679_c1_g2,TRINITY_DN75706_c0_g2,TRINITY_DN80965_c0_g4,TRINITY_DN82458_c1_g1,TRINITY_DN89487_c0_g3,TRINITY_DN92330_c1_g2,TRINITY_DN94594_c0_g1,TRINITY_DN96030_c0_g1,TRINITY_DN97495_c2_g1,TRINITY_DN98212_c0_g1,TRINITY_DN98258_c0_g1,TRINITY_DN99026_c3_g1	TRINITY_DN64594_c0_g1,TRINITY_DN73679_c1_g2,TRINITY_DN75706_c0_g2,TRINITY_DN80965_c0_g4,TRINITY_DN82458_c1_g1,TRINITY_DN89487_c0_g3,TRINITY_DN92330_c1_g2,TRINITY_DN94594_c0_g1,TRINITY_DN96030_c0_g1,TRINITY_DN97495_c2_g1,TRINITY_DN98212_c0_g1,TRINITY_DN98258_c0_g1,TRINITY_DN99026_c3_g1
GO:0009416	response to light stimulus	biological process	22/609	1612/93642	0.00109	0.0841393785310734	TRINITY_DN66987_c0_g1,TRINITY_DN73324_c3_g1,TRINITY_DN74096_c1_g1,TRINITY_DN76380_c0_g1,TRINITY_DN78453_c0_g1,TRINITY_DN79475_c1_g2,TRINITY_DN79849_c1_g1,TRINITY_DN83047_c1_g1,TRINITY_DN84523_c1_g1,TRINITY_DN87544_c1_g3,TRINITY_DN90997_c1_g1,TRINITY_DN91033_c2_g2,TRINITY_DN91545_c0_g4,TRINITY_DN92690_c1_g1,TRINITY_DN93209_c1_g1,TRINITY_DN93239_c0_g2,TRINITY_DN95710_c3_g2,TRINITY_DN97143_c3_g2,TRI…	TRINITY_DN66987_c0_g1,TRINITY_DN73324_c3_g1,TRINITY_DN74096_c1_g1,TRINITY_DN76380_c0_g1,TRINITY_DN78453_c0_g1,TRINITY_DN79475_c1_g2,TRINITY_DN79849_c1_g1,TRINITY_DN83047_c1_g1,TRINITY_DN84523_c1_g1,TRINITY_DN87544_c1_g3,TRINITY_DN90997_c1_g1,TRINITY_DN91033_c2_g2,TRINITY_DN91545_c0_g4,TRINITY_DN92690_c1_g1,TRINITY_DN93209_c1_g1,TRINITY_DN93239_c0_g2,TRINITY_DN95710_c3_g2,TRINITY_DN97143_c3_g2,TRI…
GO:0044431	Golgi apparatus part	cellular component	39/648	3564/96716	0.00220	0.0851265306122449	TRINITY_DN64594_c0_g1,TRINITY_DN68749_c0_g1,TRINITY_DN71824_c1_g1,TRINITY_DN75496_c1_g1,TRINITY_DN75706_c0_g2,TRINITY_DN76414_c0_g3,TRINITY_DN76476_c0_g2,TRINITY_DN77169_c0_g2,TRINITY_DN78795_c1_g1,TRINITY_DN79885_c0_g2,TRINITY_DN80310_c1_g3,TRINITY_DN81357_c0_g2,TRINITY_DN82314_c1_g2,TRINITY_DN82458_c1_g1,TRINITY_DN89487_c0_g3,TRINITY_DN90148_c2_g1,TRINITY_DN90825_c1_g2,TRINITY_DN91323_c1_g5,TRI…	TRINITY_DN64594_c0_g1,TRINITY_DN68749_c0_g1,TRINITY_DN71824_c1_g1,TRINITY_DN75496_c1_g1,TRINITY_DN75706_c0_g2,TRINITY_DN76414_c0_g3,TRINITY_DN76476_c0_g2,TRINITY_DN77169_c0_g2,TRINITY_DN78795_c1_g1,TRINITY_DN79885_c0_g2,TRINITY_DN80310_c1_g3,TRINITY_DN81357_c0_g2,TRINITY_DN82314_c1_g2,TRINITY_DN82458_c1_g1,TRINITY_DN89487_c0_g3,TRINITY_DN90148_c2_g1,TRINITY_DN90825_c1_g2,TRINITY_DN91323_c1_g5,TRI…
GO:0070921	regulation of production of siRNA involved in chromatin silencing by small RNA	biological process	2/609	8/93642	0.00115	0.088272191011236	TRINITY_DN72819_c0_g1,TRINITY_DN95775_c0_g1	TRINITY_DN72819_c0_g1,TRINITY_DN95775_c0_g1
GO:0044422	organelle part	cellular component	264/648	34175/96716	0.00239	0.0906288	TRINITY_DN64594_c0_g1,TRINITY_DN67158_c0_g1,TRINITY_DN68475_c0_g1,TRINITY_DN68475_c0_g3,TRINITY_DN68749_c0_g1,TRINITY_DN69571_c1_g1,TRINITY_DN69726_c2_g1,TRINITY_DN70421_c0_g1,TRINITY_DN70599_c1_g1,TRINITY_DN70599_c1_g3,TRINITY_DN70723_c1_g1,TRINITY_DN70725_c1_g7,TRINITY_DN70885_c1_g1,TRINITY_DN71284_c1_g1,TRINITY_DN71306_c1_g4,TRINITY_DN71558_c1_g1,TRINITY_DN71824_c1_g1,TRINITY_DN71855_c4_g2,TRI…	TRINITY_DN64594_c0_g1,TRINITY_DN67158_c0_g1,TRINITY_DN68475_c0_g1,TRINITY_DN68475_c0_g3,TRINITY_DN68749_c0_g1,TRINITY_DN69571_c1_g1,TRINITY_DN69726_c2_g1,TRINITY_DN70421_c0_g1,TRINITY_DN70599_c1_g1,TRINITY_DN70599_c1_g3,TRINITY_DN70723_c1_g1,TRINITY_DN70725_c1_g7,TRINITY_DN70885_c1_g1,TRINITY_DN71284_c1_g1,TRINITY_DN71306_c1_g4,TRINITY_DN71558_c1_g1,TRINITY_DN71824_c1_g1,TRINITY_DN71855_c4_g2,TRI…
GO:0016621	cinnamoyl-CoA reductase activity	molecular function	3/669	27/102170	0.00073	0.0960471428571429	TRINITY_DN81857_c0_g1,TRINITY_DN81857_c0_g3,TRINITY_DN98228_c0_g1	TRINITY_DN81857_c0_g1,TRINITY_DN81857_c0_g3,TRINITY_DN98228_c0_g1
GO:0046906	tetrapyrrole binding	molecular function	32/669	2638/102170	0.00078	0.098322972972973	TRINITY_DN68475_c0_g1,TRINITY_DN68475_c0_g3,TRINITY_DN70599_c1_g1,TRINITY_DN70599_c1_g3,TRINITY_DN70885_c1_g1,TRINITY_DN72866_c0_g3,TRINITY_DN74684_c0_g2,TRINITY_DN77442_c1_g3,TRINITY_DN78453_c0_g1,TRINITY_DN79594_c1_g2,TRINITY_DN80065_c0_g3,TRINITY_DN80284_c2_g1,TRINITY_DN80835_c0_g1,TRINITY_DN83616_c0_g4,TRINITY_DN84104_c2_g4,TRINITY_DN86350_c0_g1,TRINITY_DN86350_c0_g2,TRINITY_DN89775_c2_g5,TRI…	TRINITY_DN68475_c0_g1,TRINITY_DN68475_c0_g3,TRINITY_DN70599_c1_g1,TRINITY_DN70599_c1_g3,TRINITY_DN70885_c1_g1,TRINITY_DN72866_c0_g3,TRINITY_DN74684_c0_g2,TRINITY_DN77442_c1_g3,TRINITY_DN78453_c0_g1,TRINITY_DN79594_c1_g2,TRINITY_DN80065_c0_g3,TRINITY_DN80284_c2_g1,TRINITY_DN80835_c0_g1,TRINITY_DN83616_c0_g4,TRINITY_DN84104_c2_g4,TRINITY_DN86350_c0_g1,TRINITY_DN86350_c0_g2,TRINITY_DN89775_c2_g5,TRI…
GO:0051538	3 iron, 4 sulfur cluster binding	molecular function	5/669	109/102170	0.00079	0.098322972972973	TRINITY_DN79475_c1_g2,TRINITY_DN81308_c1_g1,TRINITY_DN87125_c0_g3,TRINITY_DN96037_c1_g1,TRINITY_DN96704_c2_g2	TRINITY_DN79475_c1_g2,TRINITY_DN81308_c1_g1,TRINITY_DN87125_c0_g3,TRINITY_DN96037_c1_g1,TRINITY_DN96704_c2_g2
GO:0015631	tubulin binding	molecular function	7/669	228/102170	0.00083	0.0990075	TRINITY_DN77234_c1_g2,TRINITY_DN77469_c0_g1,TRINITY_DN79570_c1_g1,TRINITY_DN93760_c2_g1,TRINITY_DN94607_c0_g1,TRINITY_DN97495_c2_g1,TRINITY_DN98258_c0_g1	TRINITY_DN77234_c1_g2,TRINITY_DN77469_c0_g1,TRINITY_DN79570_c1_g1,TRINITY_DN93760_c2_g1,TRINITY_DN94607_c0_g1,TRINITY_DN97495_c2_g1,TRINITY_DN98258_c0_g1
GO:0004497	monooxygenase activity	molecular function	26/669	1992/102170	0.00085	0.0990075	TRINITY_DN68475_c0_g1,TRINITY_DN68475_c0_g3,TRINITY_DN70599_c1_g1,TRINITY_DN70599_c1_g3,TRINITY_DN70885_c1_g1,TRINITY_DN72866_c0_g3,TRINITY_DN77442_c1_g3,TRINITY_DN78453_c0_g1,TRINITY_DN79594_c1_g2,TRINITY_DN80284_c2_g1,TRINITY_DN83616_c0_g4,TRINITY_DN84104_c2_g4,TRINITY_DN89775_c2_g5,TRINITY_DN91037_c2_g3,TRINITY_DN92418_c0_g2,TRINITY_DN92708_c1_g2,TRINITY_DN93967_c0_g1,TRINITY_DN94287_c2_g1,TRI…	TRINITY_DN68475_c0_g1,TRINITY_DN68475_c0_g3,TRINITY_DN70599_c1_g1,TRINITY_DN70599_c1_g3,TRINITY_DN70885_c1_g1,TRINITY_DN72866_c0_g3,TRINITY_DN77442_c1_g3,TRINITY_DN78453_c0_g1,TRINITY_DN79594_c1_g2,TRINITY_DN80284_c2_g1,TRINITY_DN83616_c0_g4,TRINITY_DN84104_c2_g4,TRINITY_DN89775_c2_g5,TRINITY_DN91037_c2_g3,TRINITY_DN92418_c0_g2,TRINITY_DN92708_c1_g2,TRINITY_DN93967_c0_g1,TRINITY_DN94287_c2_g1,TRI…
GO:0008092	cytoskeletal protein binding	molecular function	14/669	789/102170	0.00086	0.0990075	TRINITY_DN72905_c0_g4,TRINITY_DN76839_c0_g1,TRINITY_DN77234_c1_g2,TRINITY_DN77433_c0_g1,TRINITY_DN77469_c0_g1,TRINITY_DN78702_c1_g1,TRINITY_DN79570_c1_g1,TRINITY_DN88395_c3_g2,TRINITY_DN93760_c2_g1,TRINITY_DN94607_c0_g1,TRINITY_DN96976_c1_g1,TRINITY_DN97495_c2_g1,TRINITY_DN98258_c0_g1,TRINITY_DN99055_c10_g1	TRINITY_DN72905_c0_g4,TRINITY_DN76839_c0_g1,TRINITY_DN77234_c1_g2,TRINITY_DN77433_c0_g1,TRINITY_DN77469_c0_g1,TRINITY_DN78702_c1_g1,TRINITY_DN79570_c1_g1,TRINITY_DN88395_c3_g2,TRINITY_DN93760_c2_g1,TRINITY_DN94607_c0_g1,TRINITY_DN96976_c1_g1,TRINITY_DN97495_c2_g1,TRINITY_DN98258_c0_g1,TRINITY_DN99055_c10_g1
GO:0009314	response to radiation	biological process	23/609	1750/93642	0.00138	0.104749666666667	TRINITY_DN66987_c0_g1,TRINITY_DN73324_c3_g1,TRINITY_DN74096_c1_g1,TRINITY_DN76380_c0_g1,TRINITY_DN78453_c0_g1,TRINITY_DN79475_c1_g2,TRINITY_DN79849_c1_g1,TRINITY_DN83047_c1_g1,TRINITY_DN84523_c1_g1,TRINITY_DN87544_c1_g3,TRINITY_DN90997_c1_g1,TRINITY_DN91033_c2_g2,TRINITY_DN91545_c0_g4,TRINITY_DN92690_c1_g1,TRINITY_DN93209_c1_g1,TRINITY_DN93239_c0_g2,TRINITY_DN95710_c3_g2,TRINITY_DN97143_c3_g2,TRI…	TRINITY_DN66987_c0_g1,TRINITY_DN73324_c3_g1,TRINITY_DN74096_c1_g1,TRINITY_DN76380_c0_g1,TRINITY_DN78453_c0_g1,TRINITY_DN79475_c1_g2,TRINITY_DN79849_c1_g1,TRINITY_DN83047_c1_g1,TRINITY_DN84523_c1_g1,TRINITY_DN87544_c1_g3,TRINITY_DN90997_c1_g1,TRINITY_DN91033_c2_g2,TRINITY_DN91545_c0_g4,TRINITY_DN92690_c1_g1,TRINITY_DN93209_c1_g1,TRINITY_DN93239_c0_g2,TRINITY_DN95710_c3_g2,TRINITY_DN97143_c3_g2,TRI…
GO:0006730	one-carbon metabolic process	biological process	8/609	323/93642	0.00138	0.104749666666667	TRINITY_DN70805_c2_g2,TRINITY_DN70805_c2_g3,TRINITY_DN71291_c1_g1,TRINITY_DN74847_c0_g1,TRINITY_DN76611_c0_g2,TRINITY_DN94037_c1_g2,TRINITY_DN95345_c0_g1,TRINITY_DN97471_c0_g2	TRINITY_DN70805_c2_g2,TRINITY_DN70805_c2_g3,TRINITY_DN71291_c1_g1,TRINITY_DN74847_c0_g1,TRINITY_DN76611_c0_g2,TRINITY_DN94037_c1_g2,TRINITY_DN95345_c0_g1,TRINITY_DN97471_c0_g2
GO:0061640	cytoskeleton-dependent cytokinesis	biological process	13/609	745/93642	0.00140	0.105680662983425	TRINITY_DN64594_c0_g1,TRINITY_DN73679_c1_g2,TRINITY_DN75706_c0_g2,TRINITY_DN80965_c0_g4,TRINITY_DN82458_c1_g1,TRINITY_DN89487_c0_g3,TRINITY_DN92330_c1_g2,TRINITY_DN94594_c0_g1,TRINITY_DN96030_c0_g1,TRINITY_DN97495_c2_g1,TRINITY_DN98212_c0_g1,TRINITY_DN98258_c0_g1,TRINITY_DN99026_c3_g1	TRINITY_DN64594_c0_g1,TRINITY_DN73679_c1_g2,TRINITY_DN75706_c0_g2,TRINITY_DN80965_c0_g4,TRINITY_DN82458_c1_g1,TRINITY_DN89487_c0_g3,TRINITY_DN92330_c1_g2,TRINITY_DN94594_c0_g1,TRINITY_DN96030_c0_g1,TRINITY_DN97495_c2_g1,TRINITY_DN98212_c0_g1,TRINITY_DN98258_c0_g1,TRINITY_DN99026_c3_g1
GO:0098791	Golgi subcompartment	cellular component	35/648	3151/96716	0.00287	0.106696470588235	TRINITY_DN64594_c0_g1,TRINITY_DN68749_c0_g1,TRINITY_DN71824_c1_g1,TRINITY_DN75496_c1_g1,TRINITY_DN75706_c0_g2,TRINITY_DN76476_c0_g2,TRINITY_DN77169_c0_g2,TRINITY_DN78795_c1_g1,TRINITY_DN81357_c0_g2,TRINITY_DN82314_c1_g2,TRINITY_DN82458_c1_g1,TRINITY_DN89487_c0_g3,TRINITY_DN90148_c2_g1,TRINITY_DN90825_c1_g2,TRINITY_DN91323_c1_g5,TRINITY_DN91736_c1_g1,TRINITY_DN91742_c0_g3,TRINITY_DN91813_c0_g2,TRI…	TRINITY_DN64594_c0_g1,TRINITY_DN68749_c0_g1,TRINITY_DN71824_c1_g1,TRINITY_DN75496_c1_g1,TRINITY_DN75706_c0_g2,TRINITY_DN76476_c0_g2,TRINITY_DN77169_c0_g2,TRINITY_DN78795_c1_g1,TRINITY_DN81357_c0_g2,TRINITY_DN82314_c1_g2,TRINITY_DN82458_c1_g1,TRINITY_DN89487_c0_g3,TRINITY_DN90148_c2_g1,TRINITY_DN90825_c1_g2,TRINITY_DN91323_c1_g5,TRINITY_DN91736_c1_g1,TRINITY_DN91742_c0_g3,TRINITY_DN91813_c0_g2,TRI…
GO:0051187	cofactor catabolic process	biological process	10/609	484/93642	0.00145	0.108853571428571	TRINITY_DN74684_c0_g2,TRINITY_DN75231_c0_g1,TRINITY_DN80065_c0_g3,TRINITY_DN80835_c0_g1,TRINITY_DN83600_c0_g1,TRINITY_DN86350_c0_g1,TRINITY_DN86350_c0_g2,TRINITY_DN87622_c1_g4,TRINITY_DN90918_c0_g2,TRINITY_DN94383_c0_g1	TRINITY_DN74684_c0_g2,TRINITY_DN75231_c0_g1,TRINITY_DN80065_c0_g3,TRINITY_DN80835_c0_g1,TRINITY_DN83600_c0_g1,TRINITY_DN86350_c0_g1,TRINITY_DN86350_c0_g2,TRINITY_DN87622_c1_g4,TRINITY_DN90918_c0_g2,TRINITY_DN94383_c0_g1
GO:0010086	embryonic root morphogenesis	biological process	2/609	9/93642	0.00147	0.109751967213115	TRINITY_DN86210_c0_g1,TRINITY_DN93943_c0_g3	TRINITY_DN86210_c0_g1,TRINITY_DN93943_c0_g3
GO:0015930	glutamate synthase activity	molecular function	4/669	67/102170	0.00101	0.113440243902439	TRINITY_DN79475_c1_g2,TRINITY_DN81308_c1_g1,TRINITY_DN96037_c1_g1,TRINITY_DN96704_c2_g2	TRINITY_DN79475_c1_g2,TRINITY_DN81308_c1_g1,TRINITY_DN96037_c1_g1,TRINITY_DN96704_c2_g2
GO:0010928	regulation of auxin mediated signaling pathway	biological process	4/609	76/93642	0.00157	0.116062043010753	TRINITY_DN74096_c1_g1,TRINITY_DN74996_c0_g1,TRINITY_DN95710_c3_g2,TRINITY_DN97936_c1_g1	TRINITY_DN74096_c1_g1,TRINITY_DN74996_c0_g1,TRINITY_DN95710_c3_g2,TRINITY_DN97936_c1_g1
GO:0090698	post-embryonic plant morphogenesis	biological process	10/609	490/93642	0.00158	0.116062043010753	TRINITY_DN68079_c0_g2,TRINITY_DN75411_c0_g3,TRINITY_DN76045_c0_g1,TRINITY_DN80884_c0_g1,TRINITY_DN82801_c0_g1,TRINITY_DN87261_c0_g2,TRINITY_DN92488_c0_g1,TRINITY_DN94649_c0_g3,TRINITY_DN96030_c0_g1,TRINITY_DN98453_c1_g1	TRINITY_DN68079_c0_g2,TRINITY_DN75411_c0_g3,TRINITY_DN76045_c0_g1,TRINITY_DN80884_c0_g1,TRINITY_DN82801_c0_g1,TRINITY_DN87261_c0_g2,TRINITY_DN92488_c0_g1,TRINITY_DN94649_c0_g3,TRINITY_DN96030_c0_g1,TRINITY_DN98453_c1_g1
GO:0000911	cytokinesis by cell plate formation	biological process	6/609	189/93642	0.00158	0.116062043010753	TRINITY_DN73679_c1_g2,TRINITY_DN75706_c0_g2,TRINITY_DN92330_c1_g2,TRINITY_DN96030_c0_g1,TRINITY_DN97495_c2_g1,TRINITY_DN98258_c0_g1	TRINITY_DN73679_c1_g2,TRINITY_DN75706_c0_g2,TRINITY_DN92330_c1_g2,TRINITY_DN96030_c0_g1,TRINITY_DN97495_c2_g1,TRINITY_DN98258_c0_g1
GO:0004645	phosphorylase activity	molecular function	4/669	68/102170	0.00106	0.116221428571429	TRINITY_DN82502_c0_g1,TRINITY_DN82502_c0_g3,TRINITY_DN97884_c2_g3,TRINITY_DN97884_c2_g6	TRINITY_DN82502_c0_g1,TRINITY_DN82502_c0_g3,TRINITY_DN97884_c2_g3,TRINITY_DN97884_c2_g6
GO:0010328	auxin influx transmembrane transporter activity	molecular function	3/669	31/102170	0.00110	0.117802325581395	TRINITY_DN74096_c1_g1,TRINITY_DN95710_c3_g2,TRINITY_DN97936_c1_g1	TRINITY_DN74096_c1_g1,TRINITY_DN95710_c3_g2,TRINITY_DN97936_c1_g1
GO:0009885	transmembrane histidine kinase cytokinin receptor activity	molecular function	2/669	8/102170	0.00117	0.122451136363636	TRINITY_DN86210_c0_g1,TRINITY_DN93943_c0_g3	TRINITY_DN86210_c0_g1,TRINITY_DN93943_c0_g3
GO:0009658	chloroplast organization	biological process	8/609	333/93642	0.00168	0.122747807486631	TRINITY_DN74712_c0_g1,TRINITY_DN80494_c0_g1,TRINITY_DN87488_c0_g1,TRINITY_DN87488_c0_g6,TRINITY_DN91033_c2_g2,TRINITY_DN92736_c1_g3,TRINITY_DN96139_c1_g1,TRINITY_DN97495_c2_g1	TRINITY_DN74712_c0_g1,TRINITY_DN80494_c0_g1,TRINITY_DN87488_c0_g1,TRINITY_DN87488_c0_g6,TRINITY_DN91033_c2_g2,TRINITY_DN92736_c1_g3,TRINITY_DN96139_c1_g1,TRINITY_DN97495_c2_g1
GO:0000419	DNA-directed RNA polymerase V complex	cellular component	4/648	91/96716	0.00337	0.122875384615385	TRINITY_DN72819_c0_g1,TRINITY_DN81461_c0_g3,TRINITY_DN84336_c1_g2,TRINITY_DN95775_c0_g1	TRINITY_DN72819_c0_g1,TRINITY_DN81461_c0_g3,TRINITY_DN84336_c1_g2,TRINITY_DN95775_c0_g1
GO:0009058	biosynthetic process	biological process	244/609	32143/93642	0.00175	0.127182180851064	TRINITY_DN63286_c0_g1,TRINITY_DN64594_c0_g1,TRINITY_DN66987_c0_g1,TRINITY_DN68255_c0_g1,TRINITY_DN68532_c1_g1,TRINITY_DN68749_c0_g1,TRINITY_DN68792_c0_g1,TRINITY_DN69416_c2_g1,TRINITY_DN69932_c0_g3,TRINITY_DN70026_c1_g2,TRINITY_DN70156_c0_g5,TRINITY_DN70487_c0_g1,TRINITY_DN70723_c1_g1,TRINITY_DN70805_c2_g2,TRINITY_DN70805_c2_g3,TRINITY_DN70831_c1_g2,TRINITY_DN70885_c1_g1,TRINITY_DN71291_c1_g1,TRI…	TRINITY_DN63286_c0_g1,TRINITY_DN64594_c0_g1,TRINITY_DN66987_c0_g1,TRINITY_DN68255_c0_g1,TRINITY_DN68532_c1_g1,TRINITY_DN68749_c0_g1,TRINITY_DN68792_c0_g1,TRINITY_DN69416_c2_g1,TRINITY_DN69932_c0_g3,TRINITY_DN70026_c1_g2,TRINITY_DN70156_c0_g5,TRINITY_DN70487_c0_g1,TRINITY_DN70723_c1_g1,TRINITY_DN70805_c2_g2,TRINITY_DN70805_c2_g3,TRINITY_DN70831_c1_g2,TRINITY_DN70885_c1_g1,TRINITY_DN71291_c1_g1,TRI…
GO:0010329	auxin efflux transmembrane transporter activity	molecular function	4/669	71/102170	0.00125	0.127916666666667	TRINITY_DN74096_c1_g1,TRINITY_DN75411_c0_g3,TRINITY_DN95710_c3_g2,TRINITY_DN97936_c1_g1	TRINITY_DN74096_c1_g1,TRINITY_DN75411_c0_g3,TRINITY_DN95710_c3_g2,TRINITY_DN97936_c1_g1
GO:0009615	response to virus	biological process	9/609	416/93642	0.00180	0.129476596858639	TRINITY_DN71424_c1_g2,TRINITY_DN71889_c1_g1,TRINITY_DN72303_c0_g1,TRINITY_DN73444_c1_g3,TRINITY_DN74503_c1_g2,TRINITY_DN83048_c1_g1,TRINITY_DN93594_c0_g1,TRINITY_DN97709_c0_g1,TRINITY_DN99016_c7_g5	TRINITY_DN71424_c1_g2,TRINITY_DN71889_c1_g1,TRINITY_DN72303_c0_g1,TRINITY_DN73444_c1_g3,TRINITY_DN74503_c1_g2,TRINITY_DN83048_c1_g1,TRINITY_DN93594_c0_g1,TRINITY_DN97709_c0_g1,TRINITY_DN99016_c7_g5
GO:0009933	meristem structural organization	biological process	6/609	194/93642	0.00181	0.129476596858639	TRINITY_DN70156_c0_g5,TRINITY_DN71143_c0_g1,TRINITY_DN77099_c0_g1,TRINITY_DN97262_c0_g2,TRINITY_DN98595_c1_g3,TRINITY_DN98683_c5_g1	TRINITY_DN70156_c0_g5,TRINITY_DN71143_c0_g1,TRINITY_DN77099_c0_g1,TRINITY_DN97262_c0_g2,TRINITY_DN98595_c1_g3,TRINITY_DN98683_c5_g1
GO:0016043	cellular component organization	biological process	141/609	17227/93642	0.00181	0.129476596858639	TRINITY_DN64594_c0_g1,TRINITY_DN68255_c0_g1,TRINITY_DN69726_c2_g1,TRINITY_DN70584_c0_g4,TRINITY_DN70725_c1_g7,TRINITY_DN70911_c2_g1,TRINITY_DN71554_c0_g1,TRINITY_DN71824_c1_g1,TRINITY_DN71855_c4_g2,TRINITY_DN72819_c0_g1,TRINITY_DN72905_c0_g4,TRINITY_DN73145_c2_g1,TRINITY_DN73173_c0_g2,TRINITY_DN73374_c1_g2,TRINITY_DN73613_c1_g2,TRINITY_DN73679_c0_g1,TRINITY_DN73679_c1_g2,TRINITY_DN73944_c3_g3,TRI…	TRINITY_DN64594_c0_g1,TRINITY_DN68255_c0_g1,TRINITY_DN69726_c2_g1,TRINITY_DN70584_c0_g4,TRINITY_DN70725_c1_g7,TRINITY_DN70911_c2_g1,TRINITY_DN71554_c0_g1,TRINITY_DN71824_c1_g1,TRINITY_DN71855_c4_g2,TRINITY_DN72819_c0_g1,TRINITY_DN72905_c0_g4,TRINITY_DN73145_c2_g1,TRINITY_DN73173_c0_g2,TRINITY_DN73374_c1_g2,TRINITY_DN73613_c1_g2,TRINITY_DN73679_c0_g1,TRINITY_DN73679_c1_g2,TRINITY_DN73944_c3_g3,TRI…
GO:0036115	fatty-acyl-CoA catabolic process	biological process	2/609	10/93642	0.00184	0.130324	TRINITY_DN87622_c1_g4,TRINITY_DN94383_c0_g1	TRINITY_DN87622_c1_g4,TRINITY_DN94383_c0_g1
GO:1901700	response to oxygen-containing compound	biological process	48/609	4739/93642	0.00185	0.130324	TRINITY_DN71306_c1_g4,TRINITY_DN71958_c2_g1,TRINITY_DN72303_c0_g1,TRINITY_DN72989_c0_g1,TRINITY_DN73130_c0_g1,TRINITY_DN73324_c3_g1,TRINITY_DN75228_c3_g1,TRINITY_DN75340_c0_g3,TRINITY_DN76380_c0_g1,TRINITY_DN77049_c0_g3,TRINITY_DN77929_c0_g2,TRINITY_DN78319_c0_g1,TRINITY_DN79475_c1_g2,TRINITY_DN80750_c0_g3,TRINITY_DN81058_c1_g3,TRINITY_DN82502_c0_g1,TRINITY_DN82502_c0_g3,TRINITY_DN84335_c0_g1,TRI…	TRINITY_DN71306_c1_g4,TRINITY_DN71958_c2_g1,TRINITY_DN72303_c0_g1,TRINITY_DN72989_c0_g1,TRINITY_DN73130_c0_g1,TRINITY_DN73324_c3_g1,TRINITY_DN75228_c3_g1,TRINITY_DN75340_c0_g3,TRINITY_DN76380_c0_g1,TRINITY_DN77049_c0_g3,TRINITY_DN77929_c0_g2,TRINITY_DN78319_c0_g1,TRINITY_DN79475_c1_g2,TRINITY_DN80750_c0_g3,TRINITY_DN81058_c1_g3,TRINITY_DN82502_c0_g1,TRINITY_DN82502_c0_g3,TRINITY_DN84335_c0_g1,TRI…
GO:0034285	response to disaccharide	biological process	5/609	133/93642	0.00186	0.130324	TRINITY_DN76380_c0_g1,TRINITY_DN79475_c1_g2,TRINITY_DN86210_c0_g1,TRINITY_DN93943_c0_g3,TRINITY_DN95327_c1_g1	TRINITY_DN76380_c0_g1,TRINITY_DN79475_c1_g2,TRINITY_DN86210_c0_g1,TRINITY_DN93943_c0_g3,TRINITY_DN95327_c1_g1
GO:0048437	floral organ development	biological process	10/609	501/93642	0.00186	0.130324	TRINITY_DN74096_c1_g1,TRINITY_DN75121_c0_g4,TRINITY_DN77469_c0_g4,TRINITY_DN82801_c0_g1,TRINITY_DN83719_c0_g4,TRINITY_DN85750_c2_g1,TRINITY_DN92488_c0_g1,TRINITY_DN94649_c0_g3,TRINITY_DN95710_c3_g2,TRINITY_DN97709_c0_g1	TRINITY_DN74096_c1_g1,TRINITY_DN75121_c0_g4,TRINITY_DN77469_c0_g4,TRINITY_DN82801_c0_g1,TRINITY_DN83719_c0_g4,TRINITY_DN85750_c2_g1,TRINITY_DN92488_c0_g1,TRINITY_DN94649_c0_g3,TRINITY_DN95710_c3_g2,TRINITY_DN97709_c0_g1
GO:0016410	N-acyltransferase activity	molecular function	10/669	474/102170	0.00131	0.131142391304348	TRINITY_DN68792_c0_g1,TRINITY_DN83047_c1_g1,TRINITY_DN85885_c3_g1,TRINITY_DN86405_c1_g1,TRINITY_DN91545_c0_g4,TRINITY_DN94399_c1_g1,TRINITY_DN96368_c1_g3,TRINITY_DN96797_c0_g4,TRINITY_DN97461_c0_g1,TRINITY_DN97461_c0_g2	TRINITY_DN68792_c0_g1,TRINITY_DN83047_c1_g1,TRINITY_DN85885_c3_g1,TRINITY_DN86405_c1_g1,TRINITY_DN91545_c0_g4,TRINITY_DN94399_c1_g1,TRINITY_DN96368_c1_g3,TRINITY_DN96797_c0_g4,TRINITY_DN97461_c0_g1,TRINITY_DN97461_c0_g2
GO:0009910	negative regulation of flower development	biological process	4/609	80/93642	0.00190	0.132447448979592	TRINITY_DN75121_c0_g4,TRINITY_DN82801_c0_g1,TRINITY_DN84175_c3_g2,TRINITY_DN94594_c0_g1	TRINITY_DN75121_c0_g4,TRINITY_DN82801_c0_g1,TRINITY_DN84175_c3_g2,TRINITY_DN94594_c0_g1
GO:0008080	N-acetyltransferase activity	molecular function	9/669	397/102170	0.00138	0.135210638297872	TRINITY_DN68792_c0_g1,TRINITY_DN83047_c1_g1,TRINITY_DN86405_c1_g1,TRINITY_DN91545_c0_g4,TRINITY_DN94399_c1_g1,TRINITY_DN96368_c1_g3,TRINITY_DN96797_c0_g4,TRINITY_DN97461_c0_g1,TRINITY_DN97461_c0_g2	TRINITY_DN68792_c0_g1,TRINITY_DN83047_c1_g1,TRINITY_DN86405_c1_g1,TRINITY_DN91545_c0_g4,TRINITY_DN94399_c1_g1,TRINITY_DN96368_c1_g3,TRINITY_DN96797_c0_g4,TRINITY_DN97461_c0_g1,TRINITY_DN97461_c0_g2
GO:0010105	negative regulation of ethylene-activated signaling pathway	biological process	4/609	81/93642	0.00198	0.13663	TRINITY_DN68434_c0_g1,TRINITY_DN85980_c1_g1,TRINITY_DN96351_c1_g2,TRINITY_DN97953_c3_g4	TRINITY_DN68434_c0_g1,TRINITY_DN85980_c1_g1,TRINITY_DN96351_c1_g2,TRINITY_DN97953_c3_g4
GO:0070298	negative regulation of phosphorelay signal transduction system	biological process	4/609	81/93642	0.00198	0.13663	TRINITY_DN68434_c0_g1,TRINITY_DN85980_c1_g1,TRINITY_DN96351_c1_g2,TRINITY_DN97953_c3_g4	TRINITY_DN68434_c0_g1,TRINITY_DN85980_c1_g1,TRINITY_DN96351_c1_g2,TRINITY_DN97953_c3_g4
GO:0048528	post-embryonic root development	biological process	8/609	343/93642	0.00201	0.137976108374384	TRINITY_DN73679_c1_g2,TRINITY_DN75411_c0_g3,TRINITY_DN76045_c0_g1,TRINITY_DN87261_c0_g2,TRINITY_DN88748_c0_g4,TRINITY_DN94649_c0_g3,TRINITY_DN95125_c2_g1,TRINITY_DN96030_c0_g1	TRINITY_DN73679_c1_g2,TRINITY_DN75411_c0_g3,TRINITY_DN76045_c0_g1,TRINITY_DN87261_c0_g2,TRINITY_DN88748_c0_g4,TRINITY_DN94649_c0_g3,TRINITY_DN95125_c2_g1,TRINITY_DN96030_c0_g1
GO:1901699	cellular response to nitrogen compound	biological process	11/609	595/93642	0.00205	0.137976108374384	TRINITY_DN70723_c1_g1,TRINITY_DN71306_c1_g4,TRINITY_DN71889_c1_g1,TRINITY_DN72819_c0_g1,TRINITY_DN74503_c1_g2,TRINITY_DN84335_c0_g1,TRINITY_DN84336_c1_g2,TRINITY_DN91297_c0_g1,TRINITY_DN95530_c0_g1,TRINITY_DN95775_c0_g1,TRINITY_DN97759_c1_g2	TRINITY_DN70723_c1_g1,TRINITY_DN71306_c1_g4,TRINITY_DN71889_c1_g1,TRINITY_DN72819_c0_g1,TRINITY_DN74503_c1_g2,TRINITY_DN84335_c0_g1,TRINITY_DN84336_c1_g2,TRINITY_DN91297_c0_g1,TRINITY_DN95530_c0_g1,TRINITY_DN95775_c0_g1,TRINITY_DN97759_c1_g2
GO:0009657	plastid organization	biological process	9/609	424/93642	0.00205	0.137976108374384	TRINITY_DN74712_c0_g1,TRINITY_DN80494_c0_g1,TRINITY_DN87488_c0_g1,TRINITY_DN87488_c0_g6,TRINITY_DN91033_c2_g2,TRINITY_DN92736_c1_g3,TRINITY_DN96139_c1_g1,TRINITY_DN97495_c2_g1,TRINITY_DN97626_c2_g1	TRINITY_DN74712_c0_g1,TRINITY_DN80494_c0_g1,TRINITY_DN87488_c0_g1,TRINITY_DN87488_c0_g6,TRINITY_DN91033_c2_g2,TRINITY_DN92736_c1_g3,TRINITY_DN96139_c1_g1,TRINITY_DN97495_c2_g1,TRINITY_DN97626_c2_g1
GO:1901576	organic substance biosynthetic process	biological process	239/609	31490/93642	0.00205	0.137976108374384	TRINITY_DN63286_c0_g1,TRINITY_DN64594_c0_g1,TRINITY_DN66987_c0_g1,TRINITY_DN68255_c0_g1,TRINITY_DN68532_c1_g1,TRINITY_DN68749_c0_g1,TRINITY_DN68792_c0_g1,TRINITY_DN69416_c2_g1,TRINITY_DN69932_c0_g3,TRINITY_DN70026_c1_g2,TRINITY_DN70156_c0_g5,TRINITY_DN70487_c0_g1,TRINITY_DN70723_c1_g1,TRINITY_DN70805_c2_g2,TRINITY_DN70805_c2_g3,TRINITY_DN70831_c1_g2,TRINITY_DN70885_c1_g1,TRINITY_DN71291_c1_g1,TRI…	TRINITY_DN63286_c0_g1,TRINITY_DN64594_c0_g1,TRINITY_DN66987_c0_g1,TRINITY_DN68255_c0_g1,TRINITY_DN68532_c1_g1,TRINITY_DN68749_c0_g1,TRINITY_DN68792_c0_g1,TRINITY_DN69416_c2_g1,TRINITY_DN69932_c0_g3,TRINITY_DN70026_c1_g2,TRINITY_DN70156_c0_g5,TRINITY_DN70487_c0_g1,TRINITY_DN70723_c1_g1,TRINITY_DN70805_c2_g2,TRINITY_DN70805_c2_g3,TRINITY_DN70831_c1_g2,TRINITY_DN70885_c1_g1,TRINITY_DN71291_c1_g1,TRI…
GO:0009932	cell tip growth	biological process	10/609	508/93642	0.00205	0.137976108374384	TRINITY_DN70911_c2_g1,TRINITY_DN73374_c1_g2,TRINITY_DN73679_c0_g1,TRINITY_DN86504_c0_g1,TRINITY_DN87707_c0_g1,TRINITY_DN88748_c0_g4,TRINITY_DN89072_c1_g3,TRINITY_DN92410_c0_g3,TRINITY_DN97161_c2_g1,TRINITY_DN98259_c2_g3	TRINITY_DN70911_c2_g1,TRINITY_DN73374_c1_g2,TRINITY_DN73679_c0_g1,TRINITY_DN86504_c0_g1,TRINITY_DN87707_c0_g1,TRINITY_DN88748_c0_g4,TRINITY_DN89072_c1_g3,TRINITY_DN92410_c0_g3,TRINITY_DN97161_c2_g1,TRINITY_DN98259_c2_g3
GO:0004430	1-phosphatidylinositol 4-kinase activity	molecular function	4/669	74/102170	0.00146	0.140029591836735	TRINITY_DN74815_c2_g1,TRINITY_DN76839_c0_g1,TRINITY_DN88395_c3_g2,TRINITY_DN99055_c10_g1	TRINITY_DN74815_c2_g1,TRINITY_DN76839_c0_g1,TRINITY_DN88395_c3_g2,TRINITY_DN99055_c10_g1
GO:0050521	alpha-glucan, water dikinase activity	molecular function	2/669	9/102170	0.00149	0.140029591836735	TRINITY_DN87843_c0_g2,TRINITY_DN95789_c0_g4	TRINITY_DN87843_c0_g2,TRINITY_DN95789_c0_g4
GO:0031048	chromatin silencing by small RNA	biological process	4/609	83/93642	0.00217	0.14533681372549	TRINITY_DN72819_c0_g1,TRINITY_DN91784_c1_g1,TRINITY_DN95530_c0_g1,TRINITY_DN95775_c0_g1	TRINITY_DN72819_c0_g1,TRINITY_DN91784_c1_g1,TRINITY_DN95530_c0_g1,TRINITY_DN95775_c0_g1
GO:0003824	catalytic activity	molecular function	464/669	65267/102170	0.00159	0.146439	TRINITY_DN63286_c0_g1,TRINITY_DN64594_c0_g1,TRINITY_DN65824_c0_g1,TRINITY_DN66768_c0_g1,TRINITY_DN67266_c0_g1,TRINITY_DN68079_c0_g2,TRINITY_DN68224_c1_g5,TRINITY_DN68255_c0_g1,TRINITY_DN68475_c0_g1,TRINITY_DN68475_c0_g3,TRINITY_DN68749_c0_g1,TRINITY_DN68792_c0_g1,TRINITY_DN69399_c0_g2,TRINITY_DN69416_c2_g1,TRINITY_DN69571_c1_g1,TRINITY_DN69671_c1_g2,TRINITY_DN69932_c0_g3,TRINITY_DN70421_c0_g1,TRI…	TRINITY_DN63286_c0_g1,TRINITY_DN64594_c0_g1,TRINITY_DN65824_c0_g1,TRINITY_DN66768_c0_g1,TRINITY_DN67266_c0_g1,TRINITY_DN68079_c0_g2,TRINITY_DN68224_c1_g5,TRINITY_DN68255_c0_g1,TRINITY_DN68475_c0_g1,TRINITY_DN68475_c0_g3,TRINITY_DN68749_c0_g1,TRINITY_DN68792_c0_g1,TRINITY_DN69399_c0_g2,TRINITY_DN69416_c2_g1,TRINITY_DN69571_c1_g1,TRINITY_DN69671_c1_g2,TRINITY_DN69932_c0_g3,TRINITY_DN70421_c0_g1,TRI…
GO:0030981	cortical microtubule cytoskeleton	cellular component	4/648	97/96716	0.00423	0.151322264150943	TRINITY_DN73679_c1_g2,TRINITY_DN90376_c0_g3,TRINITY_DN92678_c1_g2,TRINITY_DN98258_c0_g1	TRINITY_DN73679_c1_g2,TRINITY_DN90376_c0_g3,TRINITY_DN92678_c1_g2,TRINITY_DN98258_c0_g1
GO:0016567	protein ubiquitination	biological process	24/609	1932/93642	0.00228	0.151884805825243	TRINITY_DN68434_c0_g1,TRINITY_DN71060_c0_g3,TRINITY_DN71554_c0_g1,TRINITY_DN75376_c0_g1,TRINITY_DN77469_c0_g4,TRINITY_DN78505_c2_g1,TRINITY_DN80373_c0_g1,TRINITY_DN80708_c0_g1,TRINITY_DN83047_c1_g1,TRINITY_DN83505_c3_g2,TRINITY_DN83835_c0_g4,TRINITY_DN84353_c0_g2,TRINITY_DN84842_c1_g1,TRINITY_DN86517_c1_g1,TRINITY_DN87416_c0_g5,TRINITY_DN88188_c0_g5,TRINITY_DN89317_c0_g1,TRINITY_DN91153_c0_g2,TRI…	TRINITY_DN68434_c0_g1,TRINITY_DN71060_c0_g3,TRINITY_DN71554_c0_g1,TRINITY_DN75376_c0_g1,TRINITY_DN77469_c0_g4,TRINITY_DN78505_c2_g1,TRINITY_DN80373_c0_g1,TRINITY_DN80708_c0_g1,TRINITY_DN83047_c1_g1,TRINITY_DN83505_c3_g2,TRINITY_DN83835_c0_g4,TRINITY_DN84353_c0_g2,TRINITY_DN84842_c1_g1,TRINITY_DN86517_c1_g1,TRINITY_DN87416_c0_g5,TRINITY_DN88188_c0_g5,TRINITY_DN89317_c0_g1,TRINITY_DN91153_c0_g2,TRI…
GO:0009743	response to carbohydrate	biological process	9/609	431/93642	0.00229	0.151884805825243	TRINITY_DN73324_c3_g1,TRINITY_DN76380_c0_g1,TRINITY_DN79475_c1_g2,TRINITY_DN86210_c0_g1,TRINITY_DN91758_c3_g4,TRINITY_DN93943_c0_g3,TRINITY_DN95327_c1_g1,TRINITY_DN96892_c2_g1,TRINITY_DN97471_c1_g1	TRINITY_DN73324_c3_g1,TRINITY_DN76380_c0_g1,TRINITY_DN79475_c1_g2,TRINITY_DN86210_c0_g1,TRINITY_DN91758_c3_g4,TRINITY_DN93943_c0_g3,TRINITY_DN95327_c1_g1,TRINITY_DN96892_c2_g1,TRINITY_DN97471_c1_g1
GO:0017111	nucleoside-triphosphatase activity	molecular function	73/669	7862/102170	0.00177	0.159820588235294	TRINITY_DN68079_c0_g2,TRINITY_DN69571_c1_g1,TRINITY_DN70725_c1_g7,TRINITY_DN71042_c0_g1,TRINITY_DN71284_c1_g1,TRINITY_DN71824_c1_g1,TRINITY_DN73324_c3_g1,TRINITY_DN73605_c0_g1,TRINITY_DN73679_c0_g1,TRINITY_DN73893_c0_g3,TRINITY_DN74096_c1_g1,TRINITY_DN74512_c3_g1,TRINITY_DN74712_c0_g1,TRINITY_DN75496_c1_g1,TRINITY_DN75619_c0_g1,TRINITY_DN77169_c0_g2,TRINITY_DN79959_c0_g2,TRINITY_DN80494_c0_g1,TRI…	TRINITY_DN68079_c0_g2,TRINITY_DN69571_c1_g1,TRINITY_DN70725_c1_g7,TRINITY_DN71042_c0_g1,TRINITY_DN71284_c1_g1,TRINITY_DN71824_c1_g1,TRINITY_DN73324_c3_g1,TRINITY_DN73605_c0_g1,TRINITY_DN73679_c0_g1,TRINITY_DN73893_c0_g3,TRINITY_DN74096_c1_g1,TRINITY_DN74512_c3_g1,TRINITY_DN74712_c0_g1,TRINITY_DN75496_c1_g1,TRINITY_DN75619_c0_g1,TRINITY_DN77169_c0_g2,TRINITY_DN79959_c0_g2,TRINITY_DN80494_c0_g1,TRI…
GO:0010315	auxin efflux	biological process	3/609	41/93642	0.00243	0.160391739130435	TRINITY_DN74096_c1_g1,TRINITY_DN95710_c3_g2,TRINITY_DN97936_c1_g1	TRINITY_DN74096_c1_g1,TRINITY_DN95710_c3_g2,TRINITY_DN97936_c1_g1
GO:0051301	cell division	biological process	28/609	2398/93642	0.00248	0.162905	TRINITY_DN64594_c0_g1,TRINITY_DN70487_c0_g1,TRINITY_DN73615_c0_g1,TRINITY_DN73679_c1_g2,TRINITY_DN75706_c0_g2,TRINITY_DN77234_c1_g2,TRINITY_DN77469_c0_g1,TRINITY_DN79570_c1_g1,TRINITY_DN80373_c0_g1,TRINITY_DN80532_c2_g2,TRINITY_DN80965_c0_g4,TRINITY_DN82458_c1_g1,TRINITY_DN86039_c0_g1,TRINITY_DN89487_c0_g3,TRINITY_DN90376_c0_g3,TRINITY_DN92330_c1_g2,TRINITY_DN93760_c2_g1,TRINITY_DN94594_c0_g1,TRI…	TRINITY_DN64594_c0_g1,TRINITY_DN70487_c0_g1,TRINITY_DN73615_c0_g1,TRINITY_DN73679_c1_g2,TRINITY_DN75706_c0_g2,TRINITY_DN77234_c1_g2,TRINITY_DN77469_c0_g1,TRINITY_DN79570_c1_g1,TRINITY_DN80373_c0_g1,TRINITY_DN80532_c2_g2,TRINITY_DN80965_c0_g4,TRINITY_DN82458_c1_g1,TRINITY_DN86039_c0_g1,TRINITY_DN89487_c0_g3,TRINITY_DN90376_c0_g3,TRINITY_DN92330_c1_g2,TRINITY_DN93760_c2_g1,TRINITY_DN94594_c0_g1,TRI…
GO:0048467	gynoecium development	biological process	6/609	208/93642	0.00256	0.167355406698565	TRINITY_DN73679_c0_g1,TRINITY_DN75121_c0_g4,TRINITY_DN83719_c0_g4,TRINITY_DN85750_c2_g1,TRINITY_DN92488_c0_g1,TRINITY_DN97709_c0_g1	TRINITY_DN73679_c0_g1,TRINITY_DN75121_c0_g4,TRINITY_DN83719_c0_g4,TRINITY_DN85750_c2_g1,TRINITY_DN92488_c0_g1,TRINITY_DN97709_c0_g1
GO:0006473	protein acetylation	biological process	9/609	439/93642	0.00259	0.168510333333333	TRINITY_DN83047_c1_g1,TRINITY_DN90554_c1_g1,TRINITY_DN91545_c0_g4,TRINITY_DN94399_c1_g1,TRINITY_DN96368_c1_g3,TRINITY_DN96797_c0_g4,TRINITY_DN97461_c0_g1,TRINITY_DN97461_c0_g2,TRINITY_DN98212_c0_g1	TRINITY_DN83047_c1_g1,TRINITY_DN90554_c1_g1,TRINITY_DN91545_c0_g4,TRINITY_DN94399_c1_g1,TRINITY_DN96368_c1_g3,TRINITY_DN96797_c0_g4,TRINITY_DN97461_c0_g1,TRINITY_DN97461_c0_g2,TRINITY_DN98212_c0_g1
GO:0010378	temperature compensation of the circadian clock	biological process	2/609	12/93642	0.00267	0.171910046948357	TRINITY_DN84523_c1_g1,TRINITY_DN87544_c1_g3	TRINITY_DN84523_c1_g1,TRINITY_DN87544_c1_g3
GO:0071329	cellular response to sucrose stimulus	biological process	2/609	12/93642	0.00267	0.171910046948357	TRINITY_DN86210_c0_g1,TRINITY_DN93943_c0_g3	TRINITY_DN86210_c0_g1,TRINITY_DN93943_c0_g3
GO:0010026	trichome differentiation	biological process	6/609	210/93642	0.00268	0.171910046948357	TRINITY_DN73145_c2_g1,TRINITY_DN73679_c0_g1,TRINITY_DN78801_c1_g1,TRINITY_DN80373_c0_g1,TRINITY_DN97736_c4_g5,TRINITY_DN97736_c4_g6	TRINITY_DN73145_c2_g1,TRINITY_DN73679_c0_g1,TRINITY_DN78801_c1_g1,TRINITY_DN80373_c0_g1,TRINITY_DN97736_c4_g5,TRINITY_DN97736_c4_g6
GO:0044446	intracellular organelle part	cellular component	260/648	34025/96716	0.00491	0.172395555555556	TRINITY_DN64594_c0_g1,TRINITY_DN67158_c0_g1,TRINITY_DN68475_c0_g1,TRINITY_DN68475_c0_g3,TRINITY_DN68749_c0_g1,TRINITY_DN69571_c1_g1,TRINITY_DN69726_c2_g1,TRINITY_DN70421_c0_g1,TRINITY_DN70599_c1_g3,TRINITY_DN70723_c1_g1,TRINITY_DN70725_c1_g7,TRINITY_DN70885_c1_g1,TRINITY_DN71284_c1_g1,TRINITY_DN71306_c1_g4,TRINITY_DN71558_c1_g1,TRINITY_DN71824_c1_g1,TRINITY_DN71855_c4_g2,TRINITY_DN71889_c1_g1,TRI…	TRINITY_DN64594_c0_g1,TRINITY_DN67158_c0_g1,TRINITY_DN68475_c0_g1,TRINITY_DN68475_c0_g3,TRINITY_DN68749_c0_g1,TRINITY_DN69571_c1_g1,TRINITY_DN69726_c2_g1,TRINITY_DN70421_c0_g1,TRINITY_DN70599_c1_g3,TRINITY_DN70723_c1_g1,TRINITY_DN70725_c1_g7,TRINITY_DN70885_c1_g1,TRINITY_DN71284_c1_g1,TRINITY_DN71306_c1_g4,TRINITY_DN71558_c1_g1,TRINITY_DN71824_c1_g1,TRINITY_DN71855_c4_g2,TRINITY_DN71889_c1_g1,TRI…
GO:0071554	cell wall organization or biogenesis	biological process	42/609	4089/93642	0.00273	0.174299018691589	TRINITY_DN64594_c0_g1,TRINITY_DN68532_c1_g1,TRINITY_DN70584_c0_g4,TRINITY_DN73173_c0_g2,TRINITY_DN73613_c1_g2,TRINITY_DN73944_c3_g3,TRINITY_DN74461_c0_g1,TRINITY_DN77296_c1_g1,TRINITY_DN78453_c0_g1,TRINITY_DN80065_c0_g3,TRINITY_DN80415_c0_g1,TRINITY_DN80965_c0_g4,TRINITY_DN81502_c0_g2,TRINITY_DN82458_c1_g1,TRINITY_DN82528_c0_g1,TRINITY_DN82642_c3_g2,TRINITY_DN86350_c0_g1,TRINITY_DN86350_c0_g2,TRI…	TRINITY_DN64594_c0_g1,TRINITY_DN68532_c1_g1,TRINITY_DN70584_c0_g4,TRINITY_DN73173_c0_g2,TRINITY_DN73613_c1_g2,TRINITY_DN73944_c3_g3,TRINITY_DN74461_c0_g1,TRINITY_DN77296_c1_g1,TRINITY_DN78453_c0_g1,TRINITY_DN80065_c0_g3,TRINITY_DN80415_c0_g1,TRINITY_DN80965_c0_g4,TRINITY_DN81502_c0_g2,TRINITY_DN82458_c1_g1,TRINITY_DN82528_c0_g1,TRINITY_DN82642_c3_g2,TRINITY_DN86350_c0_g1,TRINITY_DN86350_c0_g2,TRI…
GO:0043044	ATP-dependent chromatin remodeling	biological process	5/609	146/93642	0.00278	0.17584787037037	TRINITY_DN70725_c1_g7,TRINITY_DN96369_c2_g1,TRINITY_DN96369_c2_g3,TRINITY_DN97970_c2_g1,TRINITY_DN98212_c0_g1	TRINITY_DN70725_c1_g7,TRINITY_DN96369_c2_g1,TRINITY_DN96369_c2_g3,TRINITY_DN97970_c2_g1,TRINITY_DN98212_c0_g1
GO:0006013	mannose metabolic process	biological process	3/609	43/93642	0.00278	0.17584787037037	TRINITY_DN90280_c0_g1,TRINITY_DN96045_c0_g1,TRINITY_DN99036_c3_g3	TRINITY_DN90280_c0_g1,TRINITY_DN96045_c0_g1,TRINITY_DN99036_c3_g3
GO:0080161	auxin transmembrane transporter activity	molecular function	4/669	81/102170	0.00203	0.179772115384615	TRINITY_DN74096_c1_g1,TRINITY_DN75411_c0_g3,TRINITY_DN95710_c3_g2,TRINITY_DN97936_c1_g1	TRINITY_DN74096_c1_g1,TRINITY_DN75411_c0_g3,TRINITY_DN95710_c3_g2,TRINITY_DN97936_c1_g1
GO:0016462	pyrophosphatase activity	molecular function	75/669	8172/102170	0.00207	0.179855660377358	TRINITY_DN68079_c0_g2,TRINITY_DN69571_c1_g1,TRINITY_DN70725_c1_g7,TRINITY_DN71042_c0_g1,TRINITY_DN71284_c1_g1,TRINITY_DN71824_c1_g1,TRINITY_DN73324_c3_g1,TRINITY_DN73605_c0_g1,TRINITY_DN73679_c0_g1,TRINITY_DN73893_c0_g3,TRINITY_DN74096_c1_g1,TRINITY_DN74512_c3_g1,TRINITY_DN74712_c0_g1,TRINITY_DN75496_c1_g1,TRINITY_DN75619_c0_g1,TRINITY_DN77169_c0_g2,TRINITY_DN79959_c0_g2,TRINITY_DN80494_c0_g1,TRI…	TRINITY_DN68079_c0_g2,TRINITY_DN69571_c1_g1,TRINITY_DN70725_c1_g7,TRINITY_DN71042_c0_g1,TRINITY_DN71284_c1_g1,TRINITY_DN71824_c1_g1,TRINITY_DN73324_c3_g1,TRINITY_DN73605_c0_g1,TRINITY_DN73679_c0_g1,TRINITY_DN73893_c0_g3,TRINITY_DN74096_c1_g1,TRINITY_DN74512_c3_g1,TRINITY_DN74712_c0_g1,TRINITY_DN75496_c1_g1,TRINITY_DN75619_c0_g1,TRINITY_DN77169_c0_g2,TRINITY_DN79959_c0_g2,TRINITY_DN80494_c0_g1,TRI…
GO:0048532	anatomical structure arrangement	biological process	6/609	213/93642	0.00287	0.180704193548387	TRINITY_DN70156_c0_g5,TRINITY_DN71143_c0_g1,TRINITY_DN77099_c0_g1,TRINITY_DN97262_c0_g2,TRINITY_DN98595_c1_g3,TRINITY_DN98683_c5_g1	TRINITY_DN70156_c0_g5,TRINITY_DN71143_c0_g1,TRINITY_DN77099_c0_g1,TRINITY_DN97262_c0_g2,TRINITY_DN98595_c1_g3,TRINITY_DN98683_c5_g1
GO:0048509	regulation of meristem development	biological process	7/609	286/93642	0.00290	0.180724227272727	TRINITY_DN71143_c0_g1,TRINITY_DN71424_c1_g2,TRINITY_DN81232_c0_g1,TRINITY_DN86210_c0_g1,TRINITY_DN89685_c1_g2,TRINITY_DN93594_c0_g1,TRINITY_DN93943_c0_g3	TRINITY_DN71143_c0_g1,TRINITY_DN71424_c1_g2,TRINITY_DN81232_c0_g1,TRINITY_DN86210_c0_g1,TRINITY_DN89685_c1_g2,TRINITY_DN93594_c0_g1,TRINITY_DN93943_c0_g3
GO:0009958	positive gravitropism	biological process	4/609	90/93642	0.00291	0.180724227272727	TRINITY_DN74096_c1_g1,TRINITY_DN74996_c0_g1,TRINITY_DN86517_c1_g1,TRINITY_DN95710_c3_g2	TRINITY_DN74096_c1_g1,TRINITY_DN74996_c0_g1,TRINITY_DN86517_c1_g1,TRINITY_DN95710_c3_g2
GO:0042335	cuticle development	biological process	4/609	90/93642	0.00291	0.180724227272727	TRINITY_DN71042_c0_g1,TRINITY_DN74691_c0_g3,TRINITY_DN80004_c0_g1,TRINITY_DN95777_c4_g2	TRINITY_DN71042_c0_g1,TRINITY_DN74691_c0_g3,TRINITY_DN80004_c0_g1,TRINITY_DN95777_c4_g2
GO:0016818	hydrolase activity, acting on acid anhydrides, in phosphorus-containing anhydrides	molecular function	75/669	8185/102170	0.00216	0.1842	TRINITY_DN68079_c0_g2,TRINITY_DN69571_c1_g1,TRINITY_DN70725_c1_g7,TRINITY_DN71042_c0_g1,TRINITY_DN71284_c1_g1,TRINITY_DN71824_c1_g1,TRINITY_DN73324_c3_g1,TRINITY_DN73605_c0_g1,TRINITY_DN73679_c0_g1,TRINITY_DN73893_c0_g3,TRINITY_DN74096_c1_g1,TRINITY_DN74512_c3_g1,TRINITY_DN74712_c0_g1,TRINITY_DN75496_c1_g1,TRINITY_DN75619_c0_g1,TRINITY_DN77169_c0_g2,TRINITY_DN79959_c0_g2,TRINITY_DN80494_c0_g1,TRI…	TRINITY_DN68079_c0_g2,TRINITY_DN69571_c1_g1,TRINITY_DN70725_c1_g7,TRINITY_DN71042_c0_g1,TRINITY_DN71284_c1_g1,TRINITY_DN71824_c1_g1,TRINITY_DN73324_c3_g1,TRINITY_DN73605_c0_g1,TRINITY_DN73679_c0_g1,TRINITY_DN73893_c0_g3,TRINITY_DN74096_c1_g1,TRINITY_DN74512_c3_g1,TRINITY_DN74712_c0_g1,TRINITY_DN75496_c1_g1,TRINITY_DN75619_c0_g1,TRINITY_DN77169_c0_g2,TRINITY_DN79959_c0_g2,TRINITY_DN80494_c0_g1,TRI…
GO:0000160	phosphorelay signal transduction system	biological process	12/609	720/93642	0.00305	0.188561764705882	TRINITY_DN68434_c0_g1,TRINITY_DN68532_c1_g1,TRINITY_DN84708_c1_g1,TRINITY_DN85980_c1_g1,TRINITY_DN86210_c0_g1,TRINITY_DN90825_c1_g2,TRINITY_DN93943_c0_g3,TRINITY_DN94649_c0_g3,TRINITY_DN96351_c1_g2,TRINITY_DN97471_c1_g1,TRINITY_DN97953_c3_g4,TRINITY_DN97970_c2_g1	TRINITY_DN68434_c0_g1,TRINITY_DN68532_c1_g1,TRINITY_DN84708_c1_g1,TRINITY_DN85980_c1_g1,TRINITY_DN86210_c0_g1,TRINITY_DN90825_c1_g2,TRINITY_DN93943_c0_g3,TRINITY_DN94649_c0_g3,TRINITY_DN96351_c1_g2,TRINITY_DN97471_c1_g1,TRINITY_DN97953_c3_g4,TRINITY_DN97970_c2_g1
GO:0090697	post-embryonic plant organ morphogenesis	biological process	7/609	289/93642	0.00307	0.18870869955157	TRINITY_DN75411_c0_g3,TRINITY_DN76045_c0_g1,TRINITY_DN82801_c0_g1,TRINITY_DN87261_c0_g2,TRINITY_DN92488_c0_g1,TRINITY_DN94649_c0_g3,TRINITY_DN96030_c0_g1	TRINITY_DN75411_c0_g3,TRINITY_DN76045_c0_g1,TRINITY_DN82801_c0_g1,TRINITY_DN87261_c0_g2,TRINITY_DN92488_c0_g1,TRINITY_DN94649_c0_g3,TRINITY_DN96030_c0_g1
GO:0023051	regulation of signaling	biological process	23/609	1867/93642	0.00308	0.18870869955157	TRINITY_DN68434_c0_g1,TRINITY_DN72989_c0_g1,TRINITY_DN74096_c1_g1,TRINITY_DN74568_c0_g3,TRINITY_DN74996_c0_g1,TRINITY_DN85282_c1_g2,TRINITY_DN85980_c1_g1,TRINITY_DN88188_c0_g5,TRINITY_DN91317_c1_g5,TRINITY_DN91644_c0_g1,TRINITY_DN92492_c0_g2,TRINITY_DN94892_c0_g1,TRINITY_DN95125_c2_g1,TRINITY_DN95710_c3_g2,TRINITY_DN96030_c0_g1,TRINITY_DN96351_c1_g2,TRINITY_DN97471_c1_g1,TRINITY_DN97936_c1_g1,TRI…	TRINITY_DN68434_c0_g1,TRINITY_DN72989_c0_g1,TRINITY_DN74096_c1_g1,TRINITY_DN74568_c0_g3,TRINITY_DN74996_c0_g1,TRINITY_DN85282_c1_g2,TRINITY_DN85980_c1_g1,TRINITY_DN88188_c0_g5,TRINITY_DN91317_c1_g5,TRINITY_DN91644_c0_g1,TRINITY_DN92492_c0_g2,TRINITY_DN94892_c0_g1,TRINITY_DN95125_c2_g1,TRINITY_DN95710_c3_g2,TRINITY_DN96030_c0_g1,TRINITY_DN96351_c1_g2,TRINITY_DN97471_c1_g1,TRINITY_DN97936_c1_g1,TRI…
GO:0009784	transmembrane receptor histidine kinase activity	molecular function	2/669	11/102170	0.00226	0.189223636363636	TRINITY_DN86210_c0_g1,TRINITY_DN93943_c0_g3	TRINITY_DN86210_c0_g1,TRINITY_DN93943_c0_g3
GO:0016817	hydrolase activity, acting on acid anhydrides	molecular function	75/669	8208/102170	0.00232	0.190778571428571	TRINITY_DN68079_c0_g2,TRINITY_DN69571_c1_g1,TRINITY_DN70725_c1_g7,TRINITY_DN71042_c0_g1,TRINITY_DN71284_c1_g1,TRINITY_DN71824_c1_g1,TRINITY_DN73324_c3_g1,TRINITY_DN73605_c0_g1,TRINITY_DN73679_c0_g1,TRINITY_DN73893_c0_g3,TRINITY_DN74096_c1_g1,TRINITY_DN74512_c3_g1,TRINITY_DN74712_c0_g1,TRINITY_DN75496_c1_g1,TRINITY_DN75619_c0_g1,TRINITY_DN77169_c0_g2,TRINITY_DN79959_c0_g2,TRINITY_DN80494_c0_g1,TRI…	TRINITY_DN68079_c0_g2,TRINITY_DN69571_c1_g1,TRINITY_DN70725_c1_g7,TRINITY_DN71042_c0_g1,TRINITY_DN71284_c1_g1,TRINITY_DN71824_c1_g1,TRINITY_DN73324_c3_g1,TRINITY_DN73605_c0_g1,TRINITY_DN73679_c0_g1,TRINITY_DN73893_c0_g3,TRINITY_DN74096_c1_g1,TRINITY_DN74512_c3_g1,TRINITY_DN74712_c0_g1,TRINITY_DN75496_c1_g1,TRINITY_DN75619_c0_g1,TRINITY_DN77169_c0_g2,TRINITY_DN79959_c0_g2,TRINITY_DN80494_c0_g1,TRI…
GO:0007026	negative regulation of microtubule depolymerization	biological process	2/609	13/93642	0.00314	0.191525982142857	TRINITY_DN77469_c0_g1,TRINITY_DN93760_c2_g1	TRINITY_DN77469_c0_g1,TRINITY_DN93760_c2_g1
GO:0090558	plant epidermis development	biological process	11/609	631/93642	0.00320	0.19406296460177	TRINITY_DN73145_c2_g1,TRINITY_DN73679_c0_g1,TRINITY_DN78801_c1_g1,TRINITY_DN80373_c0_g1,TRINITY_DN92410_c0_g3,TRINITY_DN92972_c1_g1,TRINITY_DN96030_c0_g1,TRINITY_DN97471_c1_g1,TRINITY_DN97736_c4_g5,TRINITY_DN97736_c4_g6,TRINITY_DN97936_c1_g1	TRINITY_DN73145_c2_g1,TRINITY_DN73679_c0_g1,TRINITY_DN78801_c1_g1,TRINITY_DN80373_c0_g1,TRINITY_DN92410_c0_g3,TRINITY_DN92972_c1_g1,TRINITY_DN96030_c0_g1,TRINITY_DN97471_c1_g1,TRINITY_DN97736_c4_g5,TRINITY_DN97736_c4_g6,TRINITY_DN97936_c1_g1
GO:0009737	response to abscisic acid	biological process	17/609	1224/93642	0.00321	0.19406296460177	TRINITY_DN71958_c2_g1,TRINITY_DN72303_c0_g1,TRINITY_DN77049_c0_g3,TRINITY_DN78319_c0_g1,TRINITY_DN85282_c1_g2,TRINITY_DN85750_c2_g1,TRINITY_DN85946_c2_g2,TRINITY_DN86079_c0_g1,TRINITY_DN87533_c3_g4,TRINITY_DN89102_c1_g1,TRINITY_DN91464_c3_g1,TRINITY_DN91644_c0_g1,TRINITY_DN91758_c3_g4,TRINITY_DN92690_c1_g1,TRINITY_DN95125_c2_g1,TRINITY_DN96354_c1_g1,TRINITY_DN97471_c1_g1	TRINITY_DN71958_c2_g1,TRINITY_DN72303_c0_g1,TRINITY_DN77049_c0_g3,TRINITY_DN78319_c0_g1,TRINITY_DN85282_c1_g2,TRINITY_DN85750_c2_g1,TRINITY_DN85946_c2_g2,TRINITY_DN86079_c0_g1,TRINITY_DN87533_c3_g4,TRINITY_DN89102_c1_g1,TRINITY_DN91464_c3_g1,TRINITY_DN91644_c0_g1,TRINITY_DN91758_c3_g4,TRINITY_DN92690_c1_g1,TRINITY_DN95125_c2_g1,TRINITY_DN96354_c1_g1,TRINITY_DN97471_c1_g1
GO:0009845	seed germination	biological process	8/609	372/93642	0.00330	0.198625110132159	TRINITY_DN78319_c0_g1,TRINITY_DN85282_c1_g2,TRINITY_DN86210_c0_g1,TRINITY_DN89102_c1_g1,TRINITY_DN93943_c0_g3,TRINITY_DN96733_c2_g2,TRINITY_DN98277_c2_g1,TRINITY_DN98362_c5_g2	TRINITY_DN78319_c0_g1,TRINITY_DN85282_c1_g2,TRINITY_DN86210_c0_g1,TRINITY_DN89102_c1_g1,TRINITY_DN93943_c0_g3,TRINITY_DN96733_c2_g2,TRINITY_DN98277_c2_g1,TRINITY_DN98362_c5_g2
GO:0004012	phospholipid-translocating ATPase activity	molecular function	6/669	206/102170	0.00252	0.203589473684211	TRINITY_DN71824_c1_g1,TRINITY_DN77169_c0_g2,TRINITY_DN90979_c2_g1,TRINITY_DN97602_c1_g1,TRINITY_DN97602_c1_g2,TRINITY_DN97602_c2_g5	TRINITY_DN71824_c1_g1,TRINITY_DN77169_c0_g2,TRINITY_DN90979_c2_g1,TRINITY_DN97602_c1_g1,TRINITY_DN97602_c1_g2,TRINITY_DN97602_c2_g5
GO:0009966	regulation of signal transduction	biological process	22/609	1773/93642	0.00344	0.20614350877193	TRINITY_DN68434_c0_g1,TRINITY_DN72989_c0_g1,TRINITY_DN74096_c1_g1,TRINITY_DN74568_c0_g3,TRINITY_DN74996_c0_g1,TRINITY_DN85282_c1_g2,TRINITY_DN85980_c1_g1,TRINITY_DN88188_c0_g5,TRINITY_DN91317_c1_g5,TRINITY_DN91644_c0_g1,TRINITY_DN92492_c0_g2,TRINITY_DN95125_c2_g1,TRINITY_DN95710_c3_g2,TRINITY_DN96030_c0_g1,TRINITY_DN96351_c1_g2,TRINITY_DN97471_c1_g1,TRINITY_DN97936_c1_g1,TRINITY_DN97953_c3_g4,TRI…	TRINITY_DN68434_c0_g1,TRINITY_DN72989_c0_g1,TRINITY_DN74096_c1_g1,TRINITY_DN74568_c0_g3,TRINITY_DN74996_c0_g1,TRINITY_DN85282_c1_g2,TRINITY_DN85980_c1_g1,TRINITY_DN88188_c0_g5,TRINITY_DN91317_c1_g5,TRINITY_DN91644_c0_g1,TRINITY_DN92492_c0_g2,TRINITY_DN95125_c2_g1,TRINITY_DN95710_c3_g2,TRINITY_DN96030_c0_g1,TRINITY_DN96351_c1_g2,TRINITY_DN97471_c1_g1,TRINITY_DN97936_c1_g1,TRINITY_DN97953_c3_g4,TRI…
GO:0044452	nucleolar part	cellular component	11/648	667/96716	0.00598	0.206146909090909	TRINITY_DN70421_c0_g1,TRINITY_DN71855_c4_g2,TRINITY_DN71889_c1_g1,TRINITY_DN73444_c1_g3,TRINITY_DN74503_c1_g2,TRINITY_DN80794_c0_g1,TRINITY_DN81461_c0_g3,TRINITY_DN83048_c1_g1,TRINITY_DN90653_c0_g2,TRINITY_DN95813_c1_g1,TRINITY_DN96029_c2_g1	TRINITY_DN70421_c0_g1,TRINITY_DN71855_c4_g2,TRINITY_DN71889_c1_g1,TRINITY_DN73444_c1_g3,TRINITY_DN74503_c1_g2,TRINITY_DN80794_c0_g1,TRINITY_DN81461_c0_g3,TRINITY_DN83048_c1_g1,TRINITY_DN90653_c0_g2,TRINITY_DN95813_c1_g1,TRINITY_DN96029_c2_g1
GO:0009813	flavonoid biosynthetic process	biological process	8/609	375/93642	0.00346	0.206436593886463	TRINITY_DN69932_c0_g3,TRINITY_DN81990_c0_g1,TRINITY_DN85704_c1_g3,TRINITY_DN87084_c1_g4,TRINITY_DN92708_c1_g2,TRINITY_DN95367_c0_g1,TRINITY_DN96835_c0_g1,TRINITY_DN96935_c2_g2	TRINITY_DN69932_c0_g3,TRINITY_DN81990_c0_g1,TRINITY_DN85704_c1_g3,TRINITY_DN87084_c1_g4,TRINITY_DN92708_c1_g2,TRINITY_DN95367_c0_g1,TRINITY_DN96835_c0_g1,TRINITY_DN96935_c2_g2
GO:0031111	negative regulation of microtubule polymerization or depolymerization	biological process	2/609	14/93642	0.00365	0.214956681034483	TRINITY_DN77469_c0_g1,TRINITY_DN93760_c2_g1	TRINITY_DN77469_c0_g1,TRINITY_DN93760_c2_g1
GO:0051704	multi-organism process	biological process	72/609	8030/93642	0.00365	0.214956681034483	TRINITY_DN68475_c0_g1,TRINITY_DN68475_c0_g3,TRINITY_DN70599_c1_g3,TRINITY_DN70911_c2_g1,TRINITY_DN71306_c1_g4,TRINITY_DN71424_c1_g2,TRINITY_DN71558_c1_g1,TRINITY_DN71889_c1_g1,TRINITY_DN72303_c0_g1,TRINITY_DN72866_c0_g3,TRINITY_DN73324_c3_g1,TRINITY_DN73374_c1_g2,TRINITY_DN73444_c1_g3,TRINITY_DN74096_c1_g1,TRINITY_DN74503_c1_g2,TRINITY_DN75228_c3_g1,TRINITY_DN75340_c0_g3,TRINITY_DN78453_c0_g1,TRI…	TRINITY_DN68475_c0_g1,TRINITY_DN68475_c0_g3,TRINITY_DN70599_c1_g3,TRINITY_DN70911_c2_g1,TRINITY_DN71306_c1_g4,TRINITY_DN71424_c1_g2,TRINITY_DN71558_c1_g1,TRINITY_DN71889_c1_g1,TRINITY_DN72303_c0_g1,TRINITY_DN72866_c0_g3,TRINITY_DN73324_c3_g1,TRINITY_DN73374_c1_g2,TRINITY_DN73444_c1_g3,TRINITY_DN74096_c1_g1,TRINITY_DN74503_c1_g2,TRINITY_DN75228_c3_g1,TRINITY_DN75340_c0_g3,TRINITY_DN78453_c0_g1,TRI…
GO:0051239	regulation of multicellular organismal process	biological process	23/609	1894/93642	0.00365	0.214956681034483	TRINITY_DN68255_c0_g1,TRINITY_DN70911_c2_g1,TRINITY_DN73374_c1_g2,TRINITY_DN75121_c0_g4,TRINITY_DN78319_c0_g1,TRINITY_DN81232_c0_g1,TRINITY_DN82801_c0_g1,TRINITY_DN84175_c3_g2,TRINITY_DN84523_c1_g1,TRINITY_DN85282_c1_g2,TRINITY_DN86210_c0_g1,TRINITY_DN86504_c0_g1,TRINITY_DN87544_c1_g3,TRINITY_DN87707_c0_g1,TRINITY_DN89102_c1_g1,TRINITY_DN89685_c1_g2,TRINITY_DN93239_c0_g2,TRINITY_DN93943_c0_g3,TRI…	TRINITY_DN68255_c0_g1,TRINITY_DN70911_c2_g1,TRINITY_DN73374_c1_g2,TRINITY_DN75121_c0_g4,TRINITY_DN78319_c0_g1,TRINITY_DN81232_c0_g1,TRINITY_DN82801_c0_g1,TRINITY_DN84175_c3_g2,TRINITY_DN84523_c1_g1,TRINITY_DN85282_c1_g2,TRINITY_DN86210_c0_g1,TRINITY_DN86504_c0_g1,TRINITY_DN87544_c1_g3,TRINITY_DN87707_c0_g1,TRINITY_DN89102_c1_g1,TRINITY_DN89685_c1_g2,TRINITY_DN93239_c0_g2,TRINITY_DN93943_c0_g3,TRI…
GO:0009266	response to temperature stimulus	biological process	22/609	1783/93642	0.00367	0.215206909871245	TRINITY_DN70626_c0_g2,TRINITY_DN71558_c1_g1,TRINITY_DN73363_c2_g1,TRINITY_DN78240_c2_g4,TRINITY_DN79849_c1_g1,TRINITY_DN81857_c0_g1,TRINITY_DN81857_c0_g3,TRINITY_DN82502_c0_g1,TRINITY_DN82775_c4_g1,TRINITY_DN84175_c3_g2,TRINITY_DN84523_c1_g1,TRINITY_DN87544_c1_g3,TRINITY_DN90493_c3_g1,TRINITY_DN91644_c0_g1,TRINITY_DN92690_c1_g1,TRINITY_DN93209_c1_g1,TRINITY_DN93239_c0_g2,TRINITY_DN94999_c0_g1,TRI…	TRINITY_DN70626_c0_g2,TRINITY_DN71558_c1_g1,TRINITY_DN73363_c2_g1,TRINITY_DN78240_c2_g4,TRINITY_DN79849_c1_g1,TRINITY_DN81857_c0_g1,TRINITY_DN81857_c0_g3,TRINITY_DN82502_c0_g1,TRINITY_DN82775_c4_g1,TRINITY_DN84175_c3_g2,TRINITY_DN84523_c1_g1,TRINITY_DN87544_c1_g3,TRINITY_DN90493_c3_g1,TRINITY_DN91644_c0_g1,TRINITY_DN92690_c1_g1,TRINITY_DN93209_c1_g1,TRINITY_DN93239_c0_g2,TRINITY_DN94999_c0_g1,TRI…
GO:0033043	regulation of organelle organization	biological process	23/609	1898/93642	0.00375	0.218958333333333	TRINITY_DN69726_c2_g1,TRINITY_DN72819_c0_g1,TRINITY_DN72905_c0_g4,TRINITY_DN74568_c0_g3,TRINITY_DN74996_c0_g1,TRINITY_DN75121_c0_g4,TRINITY_DN77433_c0_g1,TRINITY_DN77469_c0_g1,TRINITY_DN78801_c1_g1,TRINITY_DN83047_c1_g1,TRINITY_DN89410_c0_g2,TRINITY_DN91167_c0_g1,TRINITY_DN91545_c0_g4,TRINITY_DN91784_c1_g1,TRINITY_DN93239_c0_g2,TRINITY_DN93339_c1_g1,TRINITY_DN93760_c2_g1,TRINITY_DN95775_c0_g1,TRI…	TRINITY_DN69726_c2_g1,TRINITY_DN72819_c0_g1,TRINITY_DN72905_c0_g4,TRINITY_DN74568_c0_g3,TRINITY_DN74996_c0_g1,TRINITY_DN75121_c0_g4,TRINITY_DN77433_c0_g1,TRINITY_DN77469_c0_g1,TRINITY_DN78801_c1_g1,TRINITY_DN83047_c1_g1,TRINITY_DN89410_c0_g2,TRINITY_DN91167_c0_g1,TRINITY_DN91545_c0_g4,TRINITY_DN91784_c1_g1,TRINITY_DN93239_c0_g2,TRINITY_DN93339_c1_g1,TRINITY_DN93760_c2_g1,TRINITY_DN95775_c0_g1,TRI…
GO:0010189	vitamin E biosynthetic process	biological process	3/609	48/93642	0.00381	0.220576398305085	TRINITY_DN89209_c2_g1,TRINITY_DN89634_c0_g3,TRINITY_DN90493_c3_g1	TRINITY_DN89209_c2_g1,TRINITY_DN89634_c0_g3,TRINITY_DN90493_c3_g1
GO:0042360	vitamin E metabolic process	biological process	3/609	48/93642	0.00381	0.220576398305085	TRINITY_DN89209_c2_g1,TRINITY_DN89634_c0_g3,TRINITY_DN90493_c3_g1	TRINITY_DN89209_c2_g1,TRINITY_DN89634_c0_g3,TRINITY_DN90493_c3_g1
GO:0044249	cellular biosynthetic process	biological process	230/609	30513/93642	0.00384	0.221375189873418	TRINITY_DN63286_c0_g1,TRINITY_DN64594_c0_g1,TRINITY_DN66987_c0_g1,TRINITY_DN68255_c0_g1,TRINITY_DN68532_c1_g1,TRINITY_DN68749_c0_g1,TRINITY_DN68792_c0_g1,TRINITY_DN69416_c2_g1,TRINITY_DN70026_c1_g2,TRINITY_DN70156_c0_g5,TRINITY_DN70487_c0_g1,TRINITY_DN70723_c1_g1,TRINITY_DN70805_c2_g2,TRINITY_DN70805_c2_g3,TRINITY_DN70831_c1_g2,TRINITY_DN70885_c1_g1,TRINITY_DN71291_c1_g1,TRINITY_DN71424_c1_g2,TRI…	TRINITY_DN63286_c0_g1,TRINITY_DN64594_c0_g1,TRINITY_DN66987_c0_g1,TRINITY_DN68255_c0_g1,TRINITY_DN68532_c1_g1,TRINITY_DN68749_c0_g1,TRINITY_DN68792_c0_g1,TRINITY_DN69416_c2_g1,TRINITY_DN70026_c1_g2,TRINITY_DN70156_c0_g5,TRINITY_DN70487_c0_g1,TRINITY_DN70723_c1_g1,TRINITY_DN70805_c2_g2,TRINITY_DN70805_c2_g3,TRINITY_DN70831_c1_g2,TRINITY_DN70885_c1_g1,TRINITY_DN71291_c1_g1,TRINITY_DN71424_c1_g2,TRI…
GO:0009579	thylakoid	cellular component	14/648	969/96716	0.00656	0.222102857142857	TRINITY_DN74697_c0_g6,TRINITY_DN74712_c0_g1,TRINITY_DN81660_c3_g2,TRINITY_DN85213_c0_g1,TRINITY_DN86969_c1_g2,TRINITY_DN89209_c2_g1,TRINITY_DN89214_c0_g1,TRINITY_DN91033_c2_g2,TRINITY_DN92690_c1_g1,TRINITY_DN92852_c0_g3,TRINITY_DN94476_c1_g1,TRINITY_DN96139_c1_g1,TRINITY_DN97001_c2_g2,TRINITY_DN97445_c4_g1	TRINITY_DN74697_c0_g6,TRINITY_DN74712_c0_g1,TRINITY_DN81660_c3_g2,TRINITY_DN85213_c0_g1,TRINITY_DN86969_c1_g2,TRINITY_DN89209_c2_g1,TRINITY_DN89214_c0_g1,TRINITY_DN91033_c2_g2,TRINITY_DN92690_c1_g1,TRINITY_DN92852_c0_g3,TRINITY_DN94476_c1_g1,TRINITY_DN96139_c1_g1,TRINITY_DN97001_c2_g2,TRINITY_DN97445_c4_g1
GO:0000148	1,3-beta-D-glucan synthase complex	cellular component	5/648	175/96716	0.00676	0.224858947368421	TRINITY_DN77296_c1_g1,TRINITY_DN86425_c1_g1,TRINITY_DN97121_c1_g1,TRINITY_DN97667_c3_g2,TRINITY_DN98392_c2_g1	TRINITY_DN77296_c1_g1,TRINITY_DN86425_c1_g1,TRINITY_DN97121_c1_g1,TRINITY_DN97667_c3_g2,TRINITY_DN98392_c2_g1
GO:0009631	cold acclimation	biological process	4/609	99/93642	0.00410	0.235371008403361	TRINITY_DN70626_c0_g2,TRINITY_DN71558_c1_g1,TRINITY_DN73363_c2_g1,TRINITY_DN82775_c4_g1	TRINITY_DN70626_c0_g2,TRINITY_DN71558_c1_g1,TRINITY_DN73363_c2_g1,TRINITY_DN82775_c4_g1
GO:0015114	phosphate ion transmembrane transporter activity	molecular function	2/669	13/102170	0.00318	0.248201694915254	TRINITY_DN96502_c0_g2,TRINITY_DN96502_c0_g4	TRINITY_DN96502_c0_g2,TRINITY_DN96502_c0_g4
GO:0016711	flavonoid 3'-monooxygenase activity	molecular function	2/669	13/102170	0.00318	0.248201694915254	TRINITY_DN92708_c1_g2,TRINITY_DN96935_c2_g2	TRINITY_DN92708_c1_g2,TRINITY_DN96935_c2_g2
GO:0032446	protein modification by small protein conjugation	biological process	25/609	2151/93642	0.00436	0.249249707112971	TRINITY_DN68434_c0_g1,TRINITY_DN71060_c0_g3,TRINITY_DN71554_c0_g1,TRINITY_DN75376_c0_g1,TRINITY_DN77469_c0_g4,TRINITY_DN78505_c2_g1,TRINITY_DN80373_c0_g1,TRINITY_DN80708_c0_g1,TRINITY_DN83047_c1_g1,TRINITY_DN83505_c3_g2,TRINITY_DN83835_c0_g4,TRINITY_DN84353_c0_g2,TRINITY_DN84842_c1_g1,TRINITY_DN86517_c1_g1,TRINITY_DN87416_c0_g5,TRINITY_DN88188_c0_g5,TRINITY_DN89317_c0_g1,TRINITY_DN91153_c0_g2,TRI…	TRINITY_DN68434_c0_g1,TRINITY_DN71060_c0_g3,TRINITY_DN71554_c0_g1,TRINITY_DN75376_c0_g1,TRINITY_DN77469_c0_g4,TRINITY_DN78505_c2_g1,TRINITY_DN80373_c0_g1,TRINITY_DN80708_c0_g1,TRINITY_DN83047_c1_g1,TRINITY_DN83505_c3_g2,TRINITY_DN83835_c0_g4,TRINITY_DN84353_c0_g2,TRINITY_DN84842_c1_g1,TRINITY_DN86517_c1_g1,TRINITY_DN87416_c0_g5,TRINITY_DN88188_c0_g5,TRINITY_DN89317_c0_g1,TRINITY_DN91153_c0_g2,TRI…
GO:0051276	chromosome organization	biological process	34/609	3217/93642	0.00438	0.24934975	TRINITY_DN68255_c0_g1,TRINITY_DN69726_c2_g1,TRINITY_DN70725_c1_g7,TRINITY_DN71855_c4_g2,TRINITY_DN72819_c0_g1,TRINITY_DN75121_c0_g4,TRINITY_DN83047_c1_g1,TRINITY_DN83066_c1_g3,TRINITY_DN85202_c1_g4,TRINITY_DN86039_c0_g1,TRINITY_DN89410_c0_g2,TRINITY_DN91545_c0_g4,TRINITY_DN91784_c1_g1,TRINITY_DN93239_c0_g2,TRINITY_DN93339_c1_g1,TRINITY_DN93699_c0_g1,TRINITY_DN93850_c1_g5,TRINITY_DN95490_c0_g2,TRI…	TRINITY_DN68255_c0_g1,TRINITY_DN69726_c2_g1,TRINITY_DN70725_c1_g7,TRINITY_DN71855_c4_g2,TRINITY_DN72819_c0_g1,TRINITY_DN75121_c0_g4,TRINITY_DN83047_c1_g1,TRINITY_DN83066_c1_g3,TRINITY_DN85202_c1_g4,TRINITY_DN86039_c0_g1,TRINITY_DN89410_c0_g2,TRINITY_DN91545_c0_g4,TRINITY_DN91784_c1_g1,TRINITY_DN93239_c0_g2,TRINITY_DN93339_c1_g1,TRINITY_DN93699_c0_g1,TRINITY_DN93850_c1_g5,TRINITY_DN95490_c0_g2,TRI…
GO:0034645	cellular macromolecule biosynthetic process	biological process	155/609	19645/93642	0.00443	0.251043739837398	TRINITY_DN63286_c0_g1,TRINITY_DN64594_c0_g1,TRINITY_DN66987_c0_g1,TRINITY_DN68255_c0_g1,TRINITY_DN68532_c1_g1,TRINITY_DN68749_c0_g1,TRINITY_DN70026_c1_g2,TRINITY_DN70156_c0_g5,TRINITY_DN70487_c0_g1,TRINITY_DN70723_c1_g1,TRINITY_DN70831_c1_g2,TRINITY_DN71424_c1_g2,TRINITY_DN71554_c0_g1,TRINITY_DN71558_c1_g1,TRINITY_DN71855_c4_g2,TRINITY_DN72303_c0_g1,TRINITY_DN72745_c1_g1,TRINITY_DN72819_c0_g1,TRI…	TRINITY_DN63286_c0_g1,TRINITY_DN64594_c0_g1,TRINITY_DN66987_c0_g1,TRINITY_DN68255_c0_g1,TRINITY_DN68532_c1_g1,TRINITY_DN68749_c0_g1,TRINITY_DN70026_c1_g2,TRINITY_DN70156_c0_g5,TRINITY_DN70487_c0_g1,TRINITY_DN70723_c1_g1,TRINITY_DN70831_c1_g2,TRINITY_DN71424_c1_g2,TRINITY_DN71554_c0_g1,TRINITY_DN71558_c1_g1,TRINITY_DN71855_c4_g2,TRINITY_DN72303_c0_g1,TRINITY_DN72745_c1_g1,TRINITY_DN72819_c0_g1,TRI…
GO:0010020	chloroplast fission	biological process	3/609	51/93642	0.00452	0.251043739837398	TRINITY_DN74712_c0_g1,TRINITY_DN91033_c2_g2,TRINITY_DN92736_c1_g3	TRINITY_DN74712_c0_g1,TRINITY_DN91033_c2_g2,TRINITY_DN92736_c1_g3
GO:0010588	cotyledon vascular tissue pattern formation	biological process	3/609	51/93642	0.00452	0.251043739837398	TRINITY_DN68079_c0_g2,TRINITY_DN80884_c0_g1,TRINITY_DN98453_c1_g1	TRINITY_DN68079_c0_g2,TRINITY_DN80884_c0_g1,TRINITY_DN98453_c1_g1
GO:0019288	isopentenyl diphosphate biosynthetic process, methylerythritol 4-phosphate pathway	biological process	3/609	51/93642	0.00452	0.251043739837398	TRINITY_DN75228_c3_g1,TRINITY_DN87125_c0_g3,TRINITY_DN93940_c0_g3	TRINITY_DN75228_c3_g1,TRINITY_DN87125_c0_g3,TRINITY_DN93940_c0_g3
GO:0042362	fat-soluble vitamin biosynthetic process	biological process	3/609	51/93642	0.00452	0.251043739837398	TRINITY_DN89209_c2_g1,TRINITY_DN89634_c0_g3,TRINITY_DN90493_c3_g1	TRINITY_DN89209_c2_g1,TRINITY_DN89634_c0_g3,TRINITY_DN90493_c3_g1
GO:0043572	plastid fission	biological process	3/609	51/93642	0.00452	0.251043739837398	TRINITY_DN74712_c0_g1,TRINITY_DN91033_c2_g2,TRINITY_DN92736_c1_g3	TRINITY_DN74712_c0_g1,TRINITY_DN91033_c2_g2,TRINITY_DN92736_c1_g3
GO:0010014	meristem initiation	biological process	4/609	102/93642	0.00455	0.251686842105263	TRINITY_DN70156_c0_g5,TRINITY_DN77099_c0_g1,TRINITY_DN97262_c0_g2,TRINITY_DN98595_c1_g3	TRINITY_DN70156_c0_g5,TRINITY_DN77099_c0_g1,TRINITY_DN97262_c0_g2,TRINITY_DN98595_c1_g3
GO:0043543	protein acylation	biological process	9/609	482/93642	0.00474	0.259651434262948	TRINITY_DN83047_c1_g1,TRINITY_DN90554_c1_g1,TRINITY_DN91545_c0_g4,TRINITY_DN94399_c1_g1,TRINITY_DN96368_c1_g3,TRINITY_DN96797_c0_g4,TRINITY_DN97461_c0_g1,TRINITY_DN97461_c0_g2,TRINITY_DN98212_c0_g1	TRINITY_DN83047_c1_g1,TRINITY_DN90554_c1_g1,TRINITY_DN91545_c0_g4,TRINITY_DN94399_c1_g1,TRINITY_DN96368_c1_g3,TRINITY_DN96797_c0_g4,TRINITY_DN97461_c0_g1,TRINITY_DN97461_c0_g2,TRINITY_DN98212_c0_g1
GO:0050832	defense response to fungus	biological process	12/609	762/93642	0.00476	0.259651434262948	TRINITY_DN84469_c1_g1,TRINITY_DN86350_c0_g1,TRINITY_DN86350_c0_g2,TRINITY_DN90512_c0_g2,TRINITY_DN95530_c0_g1,TRINITY_DN95617_c1_g4,TRINITY_DN96097_c3_g2,TRINITY_DN96097_c3_g4,TRINITY_DN97471_c1_g1,TRINITY_DN97970_c2_g1,TRINITY_DN98137_c2_g1,TRINITY_DN99016_c7_g5	TRINITY_DN84469_c1_g1,TRINITY_DN86350_c0_g1,TRINITY_DN86350_c0_g2,TRINITY_DN90512_c0_g2,TRINITY_DN95530_c0_g1,TRINITY_DN95617_c1_g4,TRINITY_DN96097_c3_g2,TRINITY_DN96097_c3_g4,TRINITY_DN97471_c1_g1,TRINITY_DN97970_c2_g1,TRINITY_DN98137_c2_g1,TRINITY_DN99016_c7_g5
GO:0019745	pentacyclic triterpenoid biosynthetic process	biological process	2/609	16/93642	0.00477	0.259651434262948	TRINITY_DN69416_c2_g1,TRINITY_DN96650_c2_g2	TRINITY_DN69416_c2_g1,TRINITY_DN96650_c2_g2
GO:0010152	pollen maturation	biological process	3/609	52/93642	0.00477	0.259651434262948	TRINITY_DN77469_c0_g4,TRINITY_DN90685_c2_g1,TRINITY_DN94649_c0_g3	TRINITY_DN77469_c0_g4,TRINITY_DN90685_c2_g1,TRINITY_DN94649_c0_g3
GO:0044436	thylakoid part	cellular component	12/648	792/96716	0.00800	0.26151724137931	TRINITY_DN74712_c0_g1,TRINITY_DN85213_c0_g1,TRINITY_DN86969_c1_g2,TRINITY_DN89209_c2_g1,TRINITY_DN89214_c0_g1,TRINITY_DN91033_c2_g2,TRINITY_DN92690_c1_g1,TRINITY_DN92852_c0_g3,TRINITY_DN94476_c1_g1,TRINITY_DN96139_c1_g1,TRINITY_DN97001_c2_g2,TRINITY_DN97445_c4_g1	TRINITY_DN74712_c0_g1,TRINITY_DN85213_c0_g1,TRINITY_DN86969_c1_g2,TRINITY_DN89209_c2_g1,TRINITY_DN89214_c0_g1,TRINITY_DN91033_c2_g2,TRINITY_DN92690_c1_g1,TRINITY_DN92852_c0_g3,TRINITY_DN94476_c1_g1,TRINITY_DN96139_c1_g1,TRINITY_DN97001_c2_g2,TRINITY_DN97445_c4_g1
GO:0040007	growth	biological process	32/609	2999/93642	0.00490	0.265669444444444	TRINITY_DN70723_c1_g1,TRINITY_DN70911_c2_g1,TRINITY_DN71558_c1_g1,TRINITY_DN73374_c1_g2,TRINITY_DN73679_c0_g1,TRINITY_DN74568_c0_g3,TRINITY_DN75411_c0_g3,TRINITY_DN77469_c0_g1,TRINITY_DN78453_c0_g1,TRINITY_DN78801_c1_g1,TRINITY_DN80373_c0_g1,TRINITY_DN80965_c0_g4,TRINITY_DN81232_c0_g1,TRINITY_DN81308_c1_g1,TRINITY_DN86504_c0_g1,TRINITY_DN87707_c0_g1,TRINITY_DN88748_c0_g4,TRINITY_DN89072_c1_g3,TRI…	TRINITY_DN70723_c1_g1,TRINITY_DN70911_c2_g1,TRINITY_DN71558_c1_g1,TRINITY_DN73374_c1_g2,TRINITY_DN73679_c0_g1,TRINITY_DN74568_c0_g3,TRINITY_DN75411_c0_g3,TRINITY_DN77469_c0_g1,TRINITY_DN78453_c0_g1,TRINITY_DN78801_c1_g1,TRINITY_DN80373_c0_g1,TRINITY_DN80965_c0_g4,TRINITY_DN81232_c0_g1,TRINITY_DN81308_c1_g1,TRINITY_DN86504_c0_g1,TRINITY_DN87707_c0_g1,TRINITY_DN88748_c0_g4,TRINITY_DN89072_c1_g3,TRI…
GO:0010102	lateral root morphogenesis	biological process	5/609	167/93642	0.00492	0.265699446640316	TRINITY_DN75411_c0_g3,TRINITY_DN76045_c0_g1,TRINITY_DN87261_c0_g2,TRINITY_DN94649_c0_g3,TRINITY_DN96030_c0_g1	TRINITY_DN75411_c0_g3,TRINITY_DN76045_c0_g1,TRINITY_DN87261_c0_g2,TRINITY_DN94649_c0_g3,TRINITY_DN96030_c0_g1
GO:0010029	regulation of seed germination	biological process	5/609	168/93642	0.00505	0.271116784313725	TRINITY_DN78319_c0_g1,TRINITY_DN85282_c1_g2,TRINITY_DN86210_c0_g1,TRINITY_DN89102_c1_g1,TRINITY_DN93943_c0_g3	TRINITY_DN78319_c0_g1,TRINITY_DN85282_c1_g2,TRINITY_DN86210_c0_g1,TRINITY_DN89102_c1_g1,TRINITY_DN93943_c0_g3
GO:0000902	cell morphogenesis	biological process	23/609	1947/93642	0.00506	0.271116784313725	TRINITY_DN70911_c2_g1,TRINITY_DN73145_c2_g1,TRINITY_DN73374_c1_g2,TRINITY_DN73679_c0_g1,TRINITY_DN74996_c0_g1,TRINITY_DN77296_c1_g1,TRINITY_DN78801_c1_g1,TRINITY_DN80373_c0_g1,TRINITY_DN86425_c1_g1,TRINITY_DN86504_c0_g1,TRINITY_DN87707_c0_g1,TRINITY_DN88188_c0_g5,TRINITY_DN88748_c0_g4,TRINITY_DN89072_c1_g3,TRINITY_DN92410_c0_g3,TRINITY_DN96030_c0_g1,TRINITY_DN97121_c1_g1,TRINITY_DN97161_c2_g1,TRI…	TRINITY_DN70911_c2_g1,TRINITY_DN73145_c2_g1,TRINITY_DN73374_c1_g2,TRINITY_DN73679_c0_g1,TRINITY_DN74996_c0_g1,TRINITY_DN77296_c1_g1,TRINITY_DN78801_c1_g1,TRINITY_DN80373_c0_g1,TRINITY_DN86425_c1_g1,TRINITY_DN86504_c0_g1,TRINITY_DN87707_c0_g1,TRINITY_DN88188_c0_g5,TRINITY_DN88748_c0_g4,TRINITY_DN89072_c1_g3,TRINITY_DN92410_c0_g3,TRINITY_DN96030_c0_g1,TRINITY_DN97121_c1_g1,TRINITY_DN97161_c2_g1,TRI…
GO:0009736	cytokinin-activated signaling pathway	biological process	5/609	169/93642	0.00518	0.276462265625	TRINITY_DN84708_c1_g1,TRINITY_DN86210_c0_g1,TRINITY_DN93943_c0_g3,TRINITY_DN95125_c2_g1,TRINITY_DN97471_c1_g1	TRINITY_DN84708_c1_g1,TRINITY_DN86210_c0_g1,TRINITY_DN93943_c0_g3,TRINITY_DN95125_c2_g1,TRINITY_DN97471_c1_g1
GO:1901880	negative regulation of protein depolymerization	biological process	4/609	106/93642	0.00522	0.277513073929961	TRINITY_DN72905_c0_g4,TRINITY_DN77469_c0_g1,TRINITY_DN93760_c2_g1,TRINITY_DN96976_c1_g1	TRINITY_DN72905_c0_g4,TRINITY_DN77469_c0_g1,TRINITY_DN93760_c2_g1,TRINITY_DN96976_c1_g1
GO:1990316	Atg1/ULK1 kinase complex	cellular component	2/648	21/96716	0.00865	0.277972881355932	TRINITY_DN88225_c4_g1,TRINITY_DN88225_c4_g2	TRINITY_DN88225_c4_g1,TRINITY_DN88225_c4_g2
GO:0070647	protein modification by small protein conjugation or removal	biological process	28/609	2537/93642	0.00530	0.278515	TRINITY_DN68434_c0_g1,TRINITY_DN71060_c0_g3,TRINITY_DN71554_c0_g1,TRINITY_DN75376_c0_g1,TRINITY_DN77469_c0_g4,TRINITY_DN78505_c2_g1,TRINITY_DN80373_c0_g1,TRINITY_DN80708_c0_g1,TRINITY_DN81385_c1_g2,TRINITY_DN83047_c1_g1,TRINITY_DN83505_c3_g2,TRINITY_DN83835_c0_g4,TRINITY_DN84353_c0_g2,TRINITY_DN84842_c1_g1,TRINITY_DN86517_c1_g1,TRINITY_DN87416_c0_g5,TRINITY_DN88188_c0_g5,TRINITY_DN89317_c0_g1,TRI…	TRINITY_DN68434_c0_g1,TRINITY_DN71060_c0_g3,TRINITY_DN71554_c0_g1,TRINITY_DN75376_c0_g1,TRINITY_DN77469_c0_g4,TRINITY_DN78505_c2_g1,TRINITY_DN80373_c0_g1,TRINITY_DN80708_c0_g1,TRINITY_DN81385_c1_g2,TRINITY_DN83047_c1_g1,TRINITY_DN83505_c3_g2,TRINITY_DN83835_c0_g4,TRINITY_DN84353_c0_g2,TRINITY_DN84842_c1_g1,TRINITY_DN86517_c1_g1,TRINITY_DN87416_c0_g5,TRINITY_DN88188_c0_g5,TRINITY_DN89317_c0_g1,TRI…
GO:0010101	post-embryonic root morphogenesis	biological process	5/609	170/93642	0.00530	0.278515	TRINITY_DN75411_c0_g3,TRINITY_DN76045_c0_g1,TRINITY_DN87261_c0_g2,TRINITY_DN94649_c0_g3,TRINITY_DN96030_c0_g1	TRINITY_DN75411_c0_g3,TRINITY_DN76045_c0_g1,TRINITY_DN87261_c0_g2,TRINITY_DN94649_c0_g3,TRINITY_DN96030_c0_g1
GO:0048194	Golgi vesicle budding	biological process	5/609	170/93642	0.00530	0.278515	TRINITY_DN71824_c1_g1,TRINITY_DN77169_c0_g2,TRINITY_DN97602_c1_g1,TRINITY_DN97602_c1_g2,TRINITY_DN97602_c2_g5	TRINITY_DN71824_c1_g1,TRINITY_DN77169_c0_g2,TRINITY_DN97602_c1_g1,TRINITY_DN97602_c1_g2,TRINITY_DN97602_c2_g5
GO:0009884	cytokinin receptor activity	molecular function	2/669	14/102170	0.00370	0.279270967741935	TRINITY_DN86210_c0_g1,TRINITY_DN93943_c0_g3	TRINITY_DN86210_c0_g1,TRINITY_DN93943_c0_g3
GO:0047162	17-O-deacetylvindoline O-acetyltransferase activity	molecular function	2/669	14/102170	0.00370	0.279270967741935	TRINITY_DN75021_c0_g3,TRINITY_DN96380_c1_g3	TRINITY_DN75021_c0_g3,TRINITY_DN96380_c1_g3
GO:0015562	efflux transmembrane transporter activity	molecular function	4/669	96/102170	0.00376	0.279270967741935	TRINITY_DN74096_c1_g1,TRINITY_DN75411_c0_g3,TRINITY_DN95710_c3_g2,TRINITY_DN97936_c1_g1	TRINITY_DN74096_c1_g1,TRINITY_DN75411_c0_g3,TRINITY_DN95710_c3_g2,TRINITY_DN97936_c1_g1
GO:0019742	pentacyclic triterpenoid metabolic process	biological process	2/609	17/93642	0.00538	0.281635785440613	TRINITY_DN69416_c2_g1,TRINITY_DN96650_c2_g2	TRINITY_DN69416_c2_g1,TRINITY_DN96650_c2_g2
GO:0009723	response to ethylene	biological process	11/609	678/93642	0.00542	0.28264679389313	TRINITY_DN68434_c0_g1,TRINITY_DN68532_c1_g1,TRINITY_DN76045_c0_g1,TRINITY_DN85282_c1_g2,TRINITY_DN85980_c1_g1,TRINITY_DN90825_c1_g2,TRINITY_DN94649_c0_g3,TRINITY_DN96351_c1_g2,TRINITY_DN97471_c1_g1,TRINITY_DN97953_c3_g4,TRINITY_DN97970_c2_g1	TRINITY_DN68434_c0_g1,TRINITY_DN68532_c1_g1,TRINITY_DN76045_c0_g1,TRINITY_DN85282_c1_g2,TRINITY_DN85980_c1_g1,TRINITY_DN90825_c1_g2,TRINITY_DN94649_c0_g3,TRINITY_DN96351_c1_g2,TRINITY_DN97471_c1_g1,TRINITY_DN97953_c3_g4,TRINITY_DN97970_c2_g1
GO:0071368	cellular response to cytokinin stimulus	biological process	5/609	172/93642	0.00557	0.289303674242424	TRINITY_DN84708_c1_g1,TRINITY_DN86210_c0_g1,TRINITY_DN93943_c0_g3,TRINITY_DN95125_c2_g1,TRINITY_DN97471_c1_g1	TRINITY_DN84708_c1_g1,TRINITY_DN86210_c0_g1,TRINITY_DN93943_c0_g3,TRINITY_DN95125_c2_g1,TRINITY_DN97471_c1_g1
GO:0035194	posttranscriptional gene silencing by RNA	biological process	7/609	323/93642	0.00559	0.289303674242424	TRINITY_DN70723_c1_g1,TRINITY_DN71889_c1_g1,TRINITY_DN74503_c1_g2,TRINITY_DN84336_c1_g2,TRINITY_DN91297_c0_g1,TRINITY_DN95530_c0_g1,TRINITY_DN97759_c1_g2	TRINITY_DN70723_c1_g1,TRINITY_DN71889_c1_g1,TRINITY_DN74503_c1_g2,TRINITY_DN84336_c1_g2,TRINITY_DN91297_c0_g1,TRINITY_DN95530_c0_g1,TRINITY_DN97759_c1_g2
GO:0009873	ethylene-activated signaling pathway	biological process	9/609	496/93642	0.00569	0.293367811320755	TRINITY_DN68434_c0_g1,TRINITY_DN68532_c1_g1,TRINITY_DN85980_c1_g1,TRINITY_DN90825_c1_g2,TRINITY_DN94649_c0_g3,TRINITY_DN96351_c1_g2,TRINITY_DN97471_c1_g1,TRINITY_DN97953_c3_g4,TRINITY_DN97970_c2_g1	TRINITY_DN68434_c0_g1,TRINITY_DN68532_c1_g1,TRINITY_DN85980_c1_g1,TRINITY_DN90825_c1_g2,TRINITY_DN94649_c0_g3,TRINITY_DN96351_c1_g2,TRINITY_DN97471_c1_g1,TRINITY_DN97953_c3_g4,TRINITY_DN97970_c2_g1
GO:0005623	cell	cellular component	587/648	84684/96716	0.00930	0.29388	TRINITY_DN63286_c0_g1,TRINITY_DN64594_c0_g1,TRINITY_DN65824_c0_g1,TRINITY_DN66768_c0_g1,TRINITY_DN67158_c0_g1,TRINITY_DN68079_c0_g2,TRINITY_DN68224_c1_g5,TRINITY_DN68255_c0_g1,TRINITY_DN68434_c0_g1,TRINITY_DN68440_c0_g2,TRINITY_DN68475_c0_g1,TRINITY_DN68475_c0_g3,TRINITY_DN68532_c1_g1,TRINITY_DN68749_c0_g1,TRINITY_DN68792_c0_g1,TRINITY_DN68838_c0_g1,TRINITY_DN69266_c1_g1,TRINITY_DN69571_c1_g1,TRI…	TRINITY_DN63286_c0_g1,TRINITY_DN64594_c0_g1,TRINITY_DN65824_c0_g1,TRINITY_DN66768_c0_g1,TRINITY_DN67158_c0_g1,TRINITY_DN68079_c0_g2,TRINITY_DN68224_c1_g5,TRINITY_DN68255_c0_g1,TRINITY_DN68434_c0_g1,TRINITY_DN68440_c0_g2,TRINITY_DN68475_c0_g1,TRINITY_DN68475_c0_g3,TRINITY_DN68532_c1_g1,TRINITY_DN68749_c0_g1,TRINITY_DN68792_c0_g1,TRINITY_DN68838_c0_g1,TRINITY_DN69266_c1_g1,TRINITY_DN69571_c1_g1,TRI…
GO:0031209	SCAR complex	cellular component	2/648	22/96716	0.00947	0.294346229508197	TRINITY_DN78801_c1_g1,TRINITY_DN96523_c1_g1	TRINITY_DN78801_c1_g1,TRINITY_DN96523_c1_g1
GO:0043242	negative regulation of protein complex disassembly	biological process	4/609	109/93642	0.00575	0.295346804511278	TRINITY_DN72905_c0_g4,TRINITY_DN77469_c0_g1,TRINITY_DN93760_c2_g1,TRINITY_DN96976_c1_g1	TRINITY_DN72905_c0_g4,TRINITY_DN77469_c0_g1,TRINITY_DN93760_c2_g1,TRINITY_DN96976_c1_g1
GO:0044464	cell part	cellular component	585/648	84369/96716	0.00967	0.295714838709677	TRINITY_DN63286_c0_g1,TRINITY_DN64594_c0_g1,TRINITY_DN65824_c0_g1,TRINITY_DN66768_c0_g1,TRINITY_DN67158_c0_g1,TRINITY_DN68079_c0_g2,TRINITY_DN68224_c1_g5,TRINITY_DN68255_c0_g1,TRINITY_DN68434_c0_g1,TRINITY_DN68440_c0_g2,TRINITY_DN68475_c0_g1,TRINITY_DN68475_c0_g3,TRINITY_DN68532_c1_g1,TRINITY_DN68749_c0_g1,TRINITY_DN68792_c0_g1,TRINITY_DN68838_c0_g1,TRINITY_DN69266_c1_g1,TRINITY_DN69571_c1_g1,TRI…	TRINITY_DN63286_c0_g1,TRINITY_DN64594_c0_g1,TRINITY_DN65824_c0_g1,TRINITY_DN66768_c0_g1,TRINITY_DN67158_c0_g1,TRINITY_DN68079_c0_g2,TRINITY_DN68224_c1_g5,TRINITY_DN68255_c0_g1,TRINITY_DN68434_c0_g1,TRINITY_DN68440_c0_g2,TRINITY_DN68475_c0_g1,TRINITY_DN68475_c0_g3,TRINITY_DN68532_c1_g1,TRINITY_DN68749_c0_g1,TRINITY_DN68792_c0_g1,TRINITY_DN68838_c0_g1,TRINITY_DN69266_c1_g1,TRINITY_DN69571_c1_g1,TRI…
GO:0006775	fat-soluble vitamin metabolic process	biological process	3/609	56/93642	0.00588	0.298655910780669	TRINITY_DN89209_c2_g1,TRINITY_DN89634_c0_g3,TRINITY_DN90493_c3_g1	TRINITY_DN89209_c2_g1,TRINITY_DN89634_c0_g3,TRINITY_DN90493_c3_g1
GO:0048645	animal organ formation	biological process	3/609	56/93642	0.00588	0.298655910780669	TRINITY_DN74691_c0_g3,TRINITY_DN80004_c0_g1,TRINITY_DN95777_c4_g2	TRINITY_DN74691_c0_g3,TRINITY_DN80004_c0_g1,TRINITY_DN95777_c4_g2
GO:0009624	response to nematode	biological process	6/609	247/93642	0.00588	0.298655910780669	TRINITY_DN74096_c1_g1,TRINITY_DN83638_c0_g1,TRINITY_DN92450_c0_g2,TRINITY_DN95637_c3_g4,TRINITY_DN95710_c3_g2,TRINITY_DN98362_c5_g2	TRINITY_DN74096_c1_g1,TRINITY_DN83638_c0_g1,TRINITY_DN92450_c0_g2,TRINITY_DN95637_c3_g4,TRINITY_DN95710_c3_g2,TRINITY_DN98362_c5_g2
GO:0005794	Golgi apparatus	cellular component	54/648	5804/96716	0.01003	0.301855238095238	TRINITY_DN64594_c0_g1,TRINITY_DN68749_c0_g1,TRINITY_DN71306_c1_g4,TRINITY_DN71824_c1_g1,TRINITY_DN74295_c2_g1,TRINITY_DN75496_c1_g1,TRINITY_DN75706_c0_g2,TRINITY_DN76414_c0_g3,TRINITY_DN76476_c0_g2,TRINITY_DN77009_c0_g3,TRINITY_DN77169_c0_g2,TRINITY_DN78795_c1_g1,TRINITY_DN79885_c0_g2,TRINITY_DN80310_c1_g3,TRINITY_DN80965_c0_g4,TRINITY_DN81357_c0_g2,TRINITY_DN81502_c0_g2,TRINITY_DN82314_c1_g2,TRI…	TRINITY_DN64594_c0_g1,TRINITY_DN68749_c0_g1,TRINITY_DN71306_c1_g4,TRINITY_DN71824_c1_g1,TRINITY_DN74295_c2_g1,TRINITY_DN75496_c1_g1,TRINITY_DN75706_c0_g2,TRINITY_DN76414_c0_g3,TRINITY_DN76476_c0_g2,TRINITY_DN77009_c0_g3,TRINITY_DN77169_c0_g2,TRINITY_DN78795_c1_g1,TRINITY_DN79885_c0_g2,TRINITY_DN80310_c1_g3,TRINITY_DN80965_c0_g4,TRINITY_DN81357_c0_g2,TRINITY_DN81502_c0_g2,TRINITY_DN82314_c1_g2,TRI…
GO:2000026	regulation of multicellular organismal development	biological process	18/609	1415/93642	0.00603	0.305140333333333	TRINITY_DN68255_c0_g1,TRINITY_DN75121_c0_g4,TRINITY_DN78319_c0_g1,TRINITY_DN81232_c0_g1,TRINITY_DN82801_c0_g1,TRINITY_DN84175_c3_g2,TRINITY_DN84523_c1_g1,TRINITY_DN85282_c1_g2,TRINITY_DN86210_c0_g1,TRINITY_DN87544_c1_g3,TRINITY_DN89102_c1_g1,TRINITY_DN89685_c1_g2,TRINITY_DN93239_c0_g2,TRINITY_DN93943_c0_g3,TRINITY_DN94594_c0_g1,TRINITY_DN95125_c2_g1,TRINITY_DN97232_c2_g1,TRINITY_DN98362_c5_g2	TRINITY_DN68255_c0_g1,TRINITY_DN75121_c0_g4,TRINITY_DN78319_c0_g1,TRINITY_DN81232_c0_g1,TRINITY_DN82801_c0_g1,TRINITY_DN84175_c3_g2,TRINITY_DN84523_c1_g1,TRINITY_DN85282_c1_g2,TRINITY_DN86210_c0_g1,TRINITY_DN87544_c1_g3,TRINITY_DN89102_c1_g1,TRINITY_DN89685_c1_g2,TRINITY_DN93239_c0_g2,TRINITY_DN93943_c0_g3,TRINITY_DN94594_c0_g1,TRINITY_DN95125_c2_g1,TRINITY_DN97232_c2_g1,TRINITY_DN98362_c5_g2
GO:0090351	seedling development	biological process	8/609	413/93642	0.00611	0.305672226277372	TRINITY_DN78319_c0_g1,TRINITY_DN85282_c1_g2,TRINITY_DN86210_c0_g1,TRINITY_DN89102_c1_g1,TRINITY_DN93943_c0_g3,TRINITY_DN96733_c2_g2,TRINITY_DN98277_c2_g1,TRINITY_DN98362_c5_g2	TRINITY_DN78319_c0_g1,TRINITY_DN85282_c1_g2,TRINITY_DN86210_c0_g1,TRINITY_DN89102_c1_g1,TRINITY_DN93943_c0_g3,TRINITY_DN96733_c2_g2,TRINITY_DN98277_c2_g1,TRINITY_DN98362_c5_g2
GO:0009863	salicylic acid mediated signaling pathway	biological process	5/609	176/93642	0.00613	0.305672226277372	TRINITY_DN73324_c3_g1,TRINITY_DN75228_c3_g1,TRINITY_DN85282_c1_g2,TRINITY_DN93940_c0_g3,TRINITY_DN99016_c7_g5	TRINITY_DN73324_c3_g1,TRINITY_DN75228_c3_g1,TRINITY_DN85282_c1_g2,TRINITY_DN93940_c0_g3,TRINITY_DN99016_c7_g5
GO:0048443	stamen development	biological process	5/609	176/93642	0.00613	0.305672226277372	TRINITY_DN74096_c1_g1,TRINITY_DN75121_c0_g4,TRINITY_DN77469_c0_g4,TRINITY_DN94649_c0_g3,TRINITY_DN95710_c3_g2	TRINITY_DN74096_c1_g1,TRINITY_DN75121_c0_g4,TRINITY_DN77469_c0_g4,TRINITY_DN94649_c0_g3,TRINITY_DN95710_c3_g2
GO:0048466	androecium development	biological process	5/609	176/93642	0.00613	0.305672226277372	TRINITY_DN74096_c1_g1,TRINITY_DN75121_c0_g4,TRINITY_DN77469_c0_g4,TRINITY_DN94649_c0_g3,TRINITY_DN95710_c3_g2	TRINITY_DN74096_c1_g1,TRINITY_DN75121_c0_g4,TRINITY_DN77469_c0_g4,TRINITY_DN94649_c0_g3,TRINITY_DN95710_c3_g2
GO:0071322	cellular response to carbohydrate stimulus	biological process	6/609	250/93642	0.00622	0.308902608695652	TRINITY_DN73324_c3_g1,TRINITY_DN86210_c0_g1,TRINITY_DN91758_c3_g4,TRINITY_DN93943_c0_g3,TRINITY_DN96892_c2_g1,TRINITY_DN97471_c1_g1	TRINITY_DN73324_c3_g1,TRINITY_DN86210_c0_g1,TRINITY_DN91758_c3_g4,TRINITY_DN93943_c0_g3,TRINITY_DN96892_c2_g1,TRINITY_DN97471_c1_g1
GO:0042546	cell wall biogenesis	biological process	15/609	1097/93642	0.00624	0.308902608695652	TRINITY_DN64594_c0_g1,TRINITY_DN68532_c1_g1,TRINITY_DN80415_c0_g1,TRINITY_DN80965_c0_g4,TRINITY_DN82458_c1_g1,TRINITY_DN82528_c0_g1,TRINITY_DN87713_c1_g2,TRINITY_DN88959_c0_g1,TRINITY_DN89487_c0_g3,TRINITY_DN91323_c1_g5,TRINITY_DN91736_c1_g1,TRINITY_DN92410_c0_g3,TRINITY_DN96892_c2_g1,TRINITY_DN98258_c0_g1,TRINITY_DN99026_c3_g1	TRINITY_DN64594_c0_g1,TRINITY_DN68532_c1_g1,TRINITY_DN80415_c0_g1,TRINITY_DN80965_c0_g4,TRINITY_DN82458_c1_g1,TRINITY_DN82528_c0_g1,TRINITY_DN87713_c1_g2,TRINITY_DN88959_c0_g1,TRINITY_DN89487_c0_g3,TRINITY_DN91323_c1_g5,TRINITY_DN91736_c1_g1,TRINITY_DN92410_c0_g3,TRINITY_DN96892_c2_g1,TRINITY_DN98258_c0_g1,TRINITY_DN99026_c3_g1
GO:0048440	carpel development	biological process	5/609	177/93642	0.00627	0.309267184115523	TRINITY_DN75121_c0_g4,TRINITY_DN83719_c0_g4,TRINITY_DN85750_c2_g1,TRINITY_DN92488_c0_g1,TRINITY_DN97709_c0_g1	TRINITY_DN75121_c0_g4,TRINITY_DN83719_c0_g4,TRINITY_DN85750_c2_g1,TRINITY_DN92488_c0_g1,TRINITY_DN97709_c0_g1
GO:0046500	S-adenosylmethionine metabolic process	biological process	4/609	112/93642	0.00633	0.311103561151079	TRINITY_DN70805_c2_g2,TRINITY_DN70805_c2_g3,TRINITY_DN71291_c1_g1,TRINITY_DN74847_c0_g1	TRINITY_DN70805_c2_g2,TRINITY_DN70805_c2_g3,TRINITY_DN71291_c1_g1,TRINITY_DN74847_c0_g1
GO:0005768	endosome	cellular component	27/648	2484/96716	0.01068	0.312265454545455	TRINITY_DN64594_c0_g1,TRINITY_DN70487_c0_g1,TRINITY_DN71284_c1_g1,TRINITY_DN73363_c2_g1,TRINITY_DN75706_c0_g2,TRINITY_DN76476_c0_g2,TRINITY_DN81232_c0_g1,TRINITY_DN81357_c0_g2,TRINITY_DN82314_c1_g2,TRINITY_DN82458_c1_g1,TRINITY_DN82781_c0_g1,TRINITY_DN83889_c0_g2,TRINITY_DN84714_c0_g1,TRINITY_DN85742_c1_g1,TRINITY_DN88078_c1_g2,TRINITY_DN89487_c0_g3,TRINITY_DN90148_c2_g1,TRINITY_DN90825_c1_g2,TRI…	TRINITY_DN64594_c0_g1,TRINITY_DN70487_c0_g1,TRINITY_DN71284_c1_g1,TRINITY_DN73363_c2_g1,TRINITY_DN75706_c0_g2,TRINITY_DN76476_c0_g2,TRINITY_DN81232_c0_g1,TRINITY_DN81357_c0_g2,TRINITY_DN82314_c1_g2,TRINITY_DN82458_c1_g1,TRINITY_DN82781_c0_g1,TRINITY_DN83889_c0_g2,TRINITY_DN84714_c0_g1,TRINITY_DN85742_c1_g1,TRINITY_DN88078_c1_g2,TRINITY_DN89487_c0_g3,TRINITY_DN90148_c2_g1,TRINITY_DN90825_c1_g2,TRI…
GO:0009543	chloroplast thylakoid lumen	cellular component	3/648	68/96716	0.01087	0.312265454545455	TRINITY_DN86969_c1_g2,TRINITY_DN92690_c1_g1,TRINITY_DN97445_c4_g1	TRINITY_DN86969_c1_g2,TRINITY_DN92690_c1_g1,TRINITY_DN97445_c4_g1
GO:0031978	plastid thylakoid lumen	cellular component	3/648	68/96716	0.01087	0.312265454545455	TRINITY_DN86969_c1_g2,TRINITY_DN92690_c1_g1,TRINITY_DN97445_c4_g1	TRINITY_DN86969_c1_g2,TRINITY_DN92690_c1_g1,TRINITY_DN97445_c4_g1
GO:0016705	oxidoreductase activity, acting on paired donors, with incorporation or reduction of molecular oxyge...	molecular function	27/669	2363/102170	0.00432	0.315771428571429	TRINITY_DN68475_c0_g1,TRINITY_DN68475_c0_g3,TRINITY_DN70599_c1_g1,TRINITY_DN70599_c1_g3,TRINITY_DN70885_c1_g1,TRINITY_DN72866_c0_g3,TRINITY_DN77435_c0_g5,TRINITY_DN77442_c1_g3,TRINITY_DN78453_c0_g1,TRINITY_DN79594_c1_g2,TRINITY_DN80284_c2_g1,TRINITY_DN83616_c0_g4,TRINITY_DN84104_c2_g4,TRINITY_DN89775_c2_g5,TRINITY_DN91037_c2_g3,TRINITY_DN92418_c0_g2,TRINITY_DN92708_c1_g2,TRINITY_DN93967_c0_g1,TRI…	TRINITY_DN68475_c0_g1,TRINITY_DN68475_c0_g3,TRINITY_DN70599_c1_g1,TRINITY_DN70599_c1_g3,TRINITY_DN70885_c1_g1,TRINITY_DN72866_c0_g3,TRINITY_DN77435_c0_g5,TRINITY_DN77442_c1_g3,TRINITY_DN78453_c0_g1,TRINITY_DN79594_c1_g2,TRINITY_DN80284_c2_g1,TRINITY_DN83616_c0_g4,TRINITY_DN84104_c2_g4,TRINITY_DN89775_c2_g5,TRINITY_DN91037_c2_g3,TRINITY_DN92418_c0_g2,TRINITY_DN92708_c1_g2,TRINITY_DN93967_c0_g1,TRI…
GO:0060384	innervation	biological process	1/609	1/93642	0.00650	0.317176785714286	TRINITY_DN88188_c0_g5	TRINITY_DN88188_c0_g5
GO:0090073	positive regulation of protein homodimerization activity	biological process	1/609	1/93642	0.00650	0.317176785714286	TRINITY_DN91317_c1_g5	TRINITY_DN91317_c1_g5
GO:0016441	posttranscriptional gene silencing	biological process	7/609	334/93642	0.00667	0.320700972222222	TRINITY_DN70723_c1_g1,TRINITY_DN71889_c1_g1,TRINITY_DN74503_c1_g2,TRINITY_DN84336_c1_g2,TRINITY_DN91297_c0_g1,TRINITY_DN95530_c0_g1,TRINITY_DN97759_c1_g2	TRINITY_DN70723_c1_g1,TRINITY_DN71889_c1_g1,TRINITY_DN74503_c1_g2,TRINITY_DN84336_c1_g2,TRINITY_DN91297_c0_g1,TRINITY_DN95530_c0_g1,TRINITY_DN97759_c1_g2
GO:0035019	somatic stem cell population maintenance	biological process	2/609	19/93642	0.00671	0.320700972222222	TRINITY_DN71424_c1_g2,TRINITY_DN93594_c0_g1	TRINITY_DN71424_c1_g2,TRINITY_DN93594_c0_g1
GO:0071139	resolution of recombination intermediates	biological process	2/609	19/93642	0.00671	0.320700972222222	TRINITY_DN85202_c1_g4,TRINITY_DN98929_c2_g2	TRINITY_DN85202_c1_g4,TRINITY_DN98929_c2_g2
GO:0090308	regulation of methylation-dependent chromatin silencing	biological process	2/609	19/93642	0.00671	0.320700972222222	TRINITY_DN83047_c1_g1,TRINITY_DN91545_c0_g4	TRINITY_DN83047_c1_g1,TRINITY_DN91545_c0_g4
GO:0009926	auxin polar transport	biological process	5/609	180/93642	0.00672	0.320700972222222	TRINITY_DN74096_c1_g1,TRINITY_DN95710_c3_g2,TRINITY_DN96030_c0_g1,TRINITY_DN97471_c1_g1,TRINITY_DN97936_c1_g1	TRINITY_DN74096_c1_g1,TRINITY_DN95710_c3_g2,TRINITY_DN96030_c0_g1,TRINITY_DN97471_c1_g1,TRINITY_DN97936_c1_g1
GO:0009812	flavonoid metabolic process	biological process	8/609	420/93642	0.00673	0.320700972222222	TRINITY_DN69932_c0_g3,TRINITY_DN81990_c0_g1,TRINITY_DN85704_c1_g3,TRINITY_DN87084_c1_g4,TRINITY_DN92708_c1_g2,TRINITY_DN95367_c0_g1,TRINITY_DN96835_c0_g1,TRINITY_DN96935_c2_g2	TRINITY_DN69932_c0_g3,TRINITY_DN81990_c0_g1,TRINITY_DN85704_c1_g3,TRINITY_DN87084_c1_g4,TRINITY_DN92708_c1_g2,TRINITY_DN95367_c0_g1,TRINITY_DN96835_c0_g1,TRINITY_DN96935_c2_g2
GO:0014070	response to organic cyclic compound	biological process	19/609	1542/93642	0.00674	0.320700972222222	TRINITY_DN70723_c1_g1,TRINITY_DN71889_c1_g1,TRINITY_DN72819_c0_g1,TRINITY_DN72989_c0_g1,TRINITY_DN73324_c3_g1,TRINITY_DN74503_c1_g2,TRINITY_DN74568_c0_g3,TRINITY_DN75228_c3_g1,TRINITY_DN77929_c0_g2,TRINITY_DN80750_c0_g3,TRINITY_DN83303_c2_g2,TRINITY_DN84336_c1_g2,TRINITY_DN85282_c1_g2,TRINITY_DN91297_c0_g1,TRINITY_DN93940_c0_g3,TRINITY_DN95530_c0_g1,TRINITY_DN95775_c0_g1,TRINITY_DN97759_c1_g2,TRI…	TRINITY_DN70723_c1_g1,TRINITY_DN71889_c1_g1,TRINITY_DN72819_c0_g1,TRINITY_DN72989_c0_g1,TRINITY_DN73324_c3_g1,TRINITY_DN74503_c1_g2,TRINITY_DN74568_c0_g3,TRINITY_DN75228_c3_g1,TRINITY_DN77929_c0_g2,TRINITY_DN80750_c0_g3,TRINITY_DN83303_c2_g2,TRINITY_DN84336_c1_g2,TRINITY_DN85282_c1_g2,TRINITY_DN91297_c0_g1,TRINITY_DN93940_c0_g3,TRINITY_DN95530_c0_g1,TRINITY_DN95775_c0_g1,TRINITY_DN97759_c1_g2,TRI…
GO:0044264	cellular polysaccharide metabolic process	biological process	25/609	2230/93642	0.00676	0.320700972222222	TRINITY_DN64594_c0_g1,TRINITY_DN73173_c0_g2,TRINITY_DN73944_c3_g3,TRINITY_DN77296_c1_g1,TRINITY_DN80965_c0_g4,TRINITY_DN82458_c1_g1,TRINITY_DN82502_c0_g1,TRINITY_DN82502_c0_g3,TRINITY_DN82642_c3_g2,TRINITY_DN86425_c1_g1,TRINITY_DN87713_c1_g2,TRINITY_DN89487_c0_g3,TRINITY_DN91323_c1_g5,TRINITY_DN91736_c1_g1,TRINITY_DN94345_c0_g1,TRINITY_DN94349_c0_g2,TRINITY_DN96216_c0_g1,TRINITY_DN96775_c3_g1,TRI…	TRINITY_DN64594_c0_g1,TRINITY_DN73173_c0_g2,TRINITY_DN73944_c3_g3,TRINITY_DN77296_c1_g1,TRINITY_DN80965_c0_g4,TRINITY_DN82458_c1_g1,TRINITY_DN82502_c0_g1,TRINITY_DN82502_c0_g3,TRINITY_DN82642_c3_g2,TRINITY_DN86425_c1_g1,TRINITY_DN87713_c1_g2,TRINITY_DN89487_c0_g3,TRINITY_DN91323_c1_g5,TRINITY_DN91736_c1_g1,TRINITY_DN94345_c0_g1,TRINITY_DN94349_c0_g2,TRINITY_DN96216_c0_g1,TRINITY_DN96775_c3_g1,TRI…
GO:0009860	pollen tube growth	biological process	8/609	422/93642	0.00692	0.327155570934256	TRINITY_DN70911_c2_g1,TRINITY_DN73374_c1_g2,TRINITY_DN86504_c0_g1,TRINITY_DN87707_c0_g1,TRINITY_DN88748_c0_g4,TRINITY_DN89072_c1_g3,TRINITY_DN97161_c2_g1,TRINITY_DN98259_c2_g3	TRINITY_DN70911_c2_g1,TRINITY_DN73374_c1_g2,TRINITY_DN86504_c0_g1,TRINITY_DN87707_c0_g1,TRINITY_DN88748_c0_g4,TRINITY_DN89072_c1_g3,TRINITY_DN97161_c2_g1,TRINITY_DN98259_c2_g3
GO:0016638	oxidoreductase activity, acting on the CH-NH2 group of donors	molecular function	7/669	310/102170	0.00466	0.3353015625	TRINITY_DN75340_c0_g2,TRINITY_DN75340_c0_g3,TRINITY_DN79475_c1_g2,TRINITY_DN81308_c1_g1,TRINITY_DN81660_c3_g2,TRINITY_DN96037_c1_g1,TRINITY_DN96704_c2_g2	TRINITY_DN75340_c0_g2,TRINITY_DN75340_c0_g3,TRINITY_DN79475_c1_g2,TRINITY_DN81308_c1_g1,TRINITY_DN81660_c3_g2,TRINITY_DN96037_c1_g1,TRINITY_DN96704_c2_g2
GO:0048826	cotyledon morphogenesis	biological process	3/609	60/93642	0.00712	0.335450206896552	TRINITY_DN68079_c0_g2,TRINITY_DN80884_c0_g1,TRINITY_DN98453_c1_g1	TRINITY_DN68079_c0_g2,TRINITY_DN80884_c0_g1,TRINITY_DN98453_c1_g1
GO:0010311	lateral root formation	biological process	4/609	116/93642	0.00715	0.335706013745704	TRINITY_DN75411_c0_g3,TRINITY_DN76045_c0_g1,TRINITY_DN94649_c0_g3,TRINITY_DN96030_c0_g1	TRINITY_DN75411_c0_g3,TRINITY_DN76045_c0_g1,TRINITY_DN94649_c0_g3,TRINITY_DN96030_c0_g1
GO:0006928	movement of cell or subcellular component	biological process	13/609	906/93642	0.00719	0.336427979452055	TRINITY_DN73679_c0_g1,TRINITY_DN78689_c0_g1,TRINITY_DN80494_c0_g1,TRINITY_DN82769_c1_g2,TRINITY_DN84678_c0_g1,TRINITY_DN88188_c0_g5,TRINITY_DN90122_c0_g1,TRINITY_DN92330_c1_g2,TRINITY_DN92678_c1_g2,TRINITY_DN96314_c1_g1,TRINITY_DN97495_c2_g1,TRINITY_DN98277_c2_g1,TRINITY_DN98607_c2_g1	TRINITY_DN73679_c0_g1,TRINITY_DN78689_c0_g1,TRINITY_DN80494_c0_g1,TRINITY_DN82769_c1_g2,TRINITY_DN84678_c0_g1,TRINITY_DN88188_c0_g5,TRINITY_DN90122_c0_g1,TRINITY_DN92330_c1_g2,TRINITY_DN92678_c1_g2,TRINITY_DN96314_c1_g1,TRINITY_DN97495_c2_g1,TRINITY_DN98277_c2_g1,TRINITY_DN98607_c2_g1
GO:0009648	photoperiodism	biological process	6/609	258/93642	0.00722	0.336678703071672	TRINITY_DN73324_c3_g1,TRINITY_DN83047_c1_g1,TRINITY_DN84523_c1_g1,TRINITY_DN87544_c1_g3,TRINITY_DN91545_c0_g4,TRINITY_DN93239_c0_g2	TRINITY_DN73324_c3_g1,TRINITY_DN83047_c1_g1,TRINITY_DN84523_c1_g1,TRINITY_DN87544_c1_g3,TRINITY_DN91545_c0_g4,TRINITY_DN93239_c0_g2
GO:0009109	coenzyme catabolic process	biological process	2/609	20/93642	0.00742	0.341575	TRINITY_DN87622_c1_g4,TRINITY_DN94383_c0_g1	TRINITY_DN87622_c1_g4,TRINITY_DN94383_c0_g1
GO:0033076	isoquinoline alkaloid metabolic process	biological process	2/609	20/93642	0.00742	0.341575	TRINITY_DN87069_c0_g2,TRINITY_DN98849_c3_g1	TRINITY_DN87069_c0_g2,TRINITY_DN98849_c3_g1
GO:0048578	positive regulation of long-day photoperiodism, flowering	biological process	2/609	20/93642	0.00742	0.341575	TRINITY_DN84523_c1_g1,TRINITY_DN87544_c1_g3	TRINITY_DN84523_c1_g1,TRINITY_DN87544_c1_g3
GO:0005980	glycogen catabolic process	biological process	3/609	61/93642	0.00745	0.341575	TRINITY_DN82502_c0_g1,TRINITY_DN82502_c0_g3,TRINITY_DN97884_c2_g6	TRINITY_DN82502_c0_g1,TRINITY_DN82502_c0_g3,TRINITY_DN97884_c2_g6
GO:0048868	pollen tube development	biological process	9/609	518/93642	0.00745	0.341575	TRINITY_DN70911_c2_g1,TRINITY_DN73374_c1_g2,TRINITY_DN79849_c1_g1,TRINITY_DN86504_c0_g1,TRINITY_DN87707_c0_g1,TRINITY_DN88748_c0_g4,TRINITY_DN89072_c1_g3,TRINITY_DN97161_c2_g1,TRINITY_DN98259_c2_g3	TRINITY_DN70911_c2_g1,TRINITY_DN73374_c1_g2,TRINITY_DN79849_c1_g1,TRINITY_DN86504_c0_g1,TRINITY_DN87707_c0_g1,TRINITY_DN88748_c0_g4,TRINITY_DN89072_c1_g3,TRINITY_DN97161_c2_g1,TRINITY_DN98259_c2_g3
GO:0019955	cytokine binding	molecular function	2/669	16/102170	0.00483	0.342186923076923	TRINITY_DN86210_c0_g1,TRINITY_DN93943_c0_g3	TRINITY_DN86210_c0_g1,TRINITY_DN93943_c0_g3
GO:0048588	developmental cell growth	biological process	10/609	613/93642	0.00754	0.344545217391304	TRINITY_DN70911_c2_g1,TRINITY_DN73374_c1_g2,TRINITY_DN73679_c0_g1,TRINITY_DN86504_c0_g1,TRINITY_DN87707_c0_g1,TRINITY_DN88748_c0_g4,TRINITY_DN89072_c1_g3,TRINITY_DN97161_c2_g1,TRINITY_DN97936_c1_g1,TRINITY_DN98259_c2_g3	TRINITY_DN70911_c2_g1,TRINITY_DN73374_c1_g2,TRINITY_DN73679_c0_g1,TRINITY_DN86504_c0_g1,TRINITY_DN87707_c0_g1,TRINITY_DN88748_c0_g4,TRINITY_DN89072_c1_g3,TRINITY_DN97161_c2_g1,TRINITY_DN97936_c1_g1,TRINITY_DN98259_c2_g3
GO:0009059	macromolecule biosynthetic process	biological process	155/609	19933/93642	0.00763	0.347495633333333	TRINITY_DN63286_c0_g1,TRINITY_DN64594_c0_g1,TRINITY_DN66987_c0_g1,TRINITY_DN68255_c0_g1,TRINITY_DN68532_c1_g1,TRINITY_DN68749_c0_g1,TRINITY_DN70026_c1_g2,TRINITY_DN70156_c0_g5,TRINITY_DN70487_c0_g1,TRINITY_DN70723_c1_g1,TRINITY_DN70831_c1_g2,TRINITY_DN71424_c1_g2,TRINITY_DN71554_c0_g1,TRINITY_DN71558_c1_g1,TRINITY_DN71855_c4_g2,TRINITY_DN72303_c0_g1,TRINITY_DN72745_c1_g1,TRINITY_DN72819_c0_g1,TRI…	TRINITY_DN63286_c0_g1,TRINITY_DN64594_c0_g1,TRINITY_DN66987_c0_g1,TRINITY_DN68255_c0_g1,TRINITY_DN68532_c1_g1,TRINITY_DN68749_c0_g1,TRINITY_DN70026_c1_g2,TRINITY_DN70156_c0_g5,TRINITY_DN70487_c0_g1,TRINITY_DN70723_c1_g1,TRINITY_DN70831_c1_g2,TRINITY_DN71424_c1_g2,TRINITY_DN71554_c0_g1,TRINITY_DN71558_c1_g1,TRINITY_DN71855_c4_g2,TRINITY_DN72303_c0_g1,TRINITY_DN72745_c1_g1,TRINITY_DN72819_c0_g1,TRI…
GO:0051128	regulation of cellular component organization	biological process	36/609	3593/93642	0.00772	0.350426445182724	TRINITY_DN69726_c2_g1,TRINITY_DN70911_c2_g1,TRINITY_DN72819_c0_g1,TRINITY_DN72905_c0_g4,TRINITY_DN73374_c1_g2,TRINITY_DN74568_c0_g3,TRINITY_DN74996_c0_g1,TRINITY_DN75121_c0_g4,TRINITY_DN77296_c1_g1,TRINITY_DN77433_c0_g1,TRINITY_DN77469_c0_g1,TRINITY_DN78702_c1_g1,TRINITY_DN78801_c1_g1,TRINITY_DN83047_c1_g1,TRINITY_DN86425_c1_g1,TRINITY_DN86504_c0_g1,TRINITY_DN87707_c0_g1,TRINITY_DN89410_c0_g2,TRI…	TRINITY_DN69726_c2_g1,TRINITY_DN70911_c2_g1,TRINITY_DN72819_c0_g1,TRINITY_DN72905_c0_g4,TRINITY_DN73374_c1_g2,TRINITY_DN74568_c0_g3,TRINITY_DN74996_c0_g1,TRINITY_DN75121_c0_g4,TRINITY_DN77296_c1_g1,TRINITY_DN77433_c0_g1,TRINITY_DN77469_c0_g1,TRINITY_DN78702_c1_g1,TRINITY_DN78801_c1_g1,TRINITY_DN83047_c1_g1,TRINITY_DN86425_c1_g1,TRINITY_DN86504_c0_g1,TRINITY_DN87707_c0_g1,TRINITY_DN89410_c0_g2,TRI…
GO:0048831	regulation of shoot system development	biological process	8/609	431/93642	0.00780	0.352885430463576	TRINITY_DN68255_c0_g1,TRINITY_DN75121_c0_g4,TRINITY_DN82801_c0_g1,TRINITY_DN84175_c3_g2,TRINITY_DN86210_c0_g1,TRINITY_DN93943_c0_g3,TRINITY_DN94594_c0_g1,TRINITY_DN98362_c5_g2	TRINITY_DN68255_c0_g1,TRINITY_DN75121_c0_g4,TRINITY_DN82801_c0_g1,TRINITY_DN84175_c3_g2,TRINITY_DN86210_c0_g1,TRINITY_DN93943_c0_g3,TRINITY_DN94594_c0_g1,TRINITY_DN98362_c5_g2
GO:0009735	response to cytokinin	biological process	8/609	432/93642	0.00791	0.355507664473684	TRINITY_DN81308_c1_g1,TRINITY_DN84708_c1_g1,TRINITY_DN86210_c0_g1,TRINITY_DN93943_c0_g3,TRINITY_DN95125_c2_g1,TRINITY_DN97471_c1_g1,TRINITY_DN97936_c1_g1,TRINITY_DN98191_c1_g2	TRINITY_DN81308_c1_g1,TRINITY_DN84708_c1_g1,TRINITY_DN86210_c0_g1,TRINITY_DN93943_c0_g3,TRINITY_DN95125_c2_g1,TRINITY_DN97471_c1_g1,TRINITY_DN97936_c1_g1,TRINITY_DN98191_c1_g2
GO:0010646	regulation of cell communication	biological process	22/609	1909/93642	0.00791	0.355507664473684	TRINITY_DN68434_c0_g1,TRINITY_DN72989_c0_g1,TRINITY_DN74096_c1_g1,TRINITY_DN74568_c0_g3,TRINITY_DN74996_c0_g1,TRINITY_DN85282_c1_g2,TRINITY_DN85980_c1_g1,TRINITY_DN88188_c0_g5,TRINITY_DN91317_c1_g5,TRINITY_DN91644_c0_g1,TRINITY_DN92492_c0_g2,TRINITY_DN95125_c2_g1,TRINITY_DN95710_c3_g2,TRINITY_DN96030_c0_g1,TRINITY_DN96351_c1_g2,TRINITY_DN97471_c1_g1,TRINITY_DN97936_c1_g1,TRINITY_DN97953_c3_g4,TRI…	TRINITY_DN68434_c0_g1,TRINITY_DN72989_c0_g1,TRINITY_DN74096_c1_g1,TRINITY_DN74568_c0_g3,TRINITY_DN74996_c0_g1,TRINITY_DN85282_c1_g2,TRINITY_DN85980_c1_g1,TRINITY_DN88188_c0_g5,TRINITY_DN91317_c1_g5,TRINITY_DN91644_c0_g1,TRINITY_DN92492_c0_g2,TRINITY_DN95125_c2_g1,TRINITY_DN95710_c3_g2,TRINITY_DN96030_c0_g1,TRINITY_DN96351_c1_g2,TRINITY_DN97471_c1_g1,TRINITY_DN97936_c1_g1,TRINITY_DN97953_c3_g4,TRI…
GO:0071369	cellular response to ethylene stimulus	biological process	9/609	526/93642	0.00819	0.366132679738562	TRINITY_DN68434_c0_g1,TRINITY_DN68532_c1_g1,TRINITY_DN85980_c1_g1,TRINITY_DN90825_c1_g2,TRINITY_DN94649_c0_g3,TRINITY_DN96351_c1_g2,TRINITY_DN97471_c1_g1,TRINITY_DN97953_c3_g4,TRINITY_DN97970_c2_g1	TRINITY_DN68434_c0_g1,TRINITY_DN68532_c1_g1,TRINITY_DN85980_c1_g1,TRINITY_DN90825_c1_g2,TRINITY_DN94649_c0_g3,TRINITY_DN96351_c1_g2,TRINITY_DN97471_c1_g1,TRINITY_DN97953_c3_g4,TRINITY_DN97970_c2_g1
GO:0006073	cellular glucan metabolic process	biological process	21/609	1800/93642	0.00820	0.366132679738562	TRINITY_DN64594_c0_g1,TRINITY_DN73173_c0_g2,TRINITY_DN73944_c3_g3,TRINITY_DN77296_c1_g1,TRINITY_DN80965_c0_g4,TRINITY_DN82458_c1_g1,TRINITY_DN82502_c0_g1,TRINITY_DN82502_c0_g3,TRINITY_DN86425_c1_g1,TRINITY_DN87713_c1_g2,TRINITY_DN89487_c0_g3,TRINITY_DN94345_c0_g1,TRINITY_DN94349_c0_g2,TRINITY_DN96775_c3_g1,TRINITY_DN97121_c1_g1,TRINITY_DN97667_c3_g2,TRINITY_DN97884_c2_g6,TRINITY_DN98381_c1_g2,TRI…	TRINITY_DN64594_c0_g1,TRINITY_DN73173_c0_g2,TRINITY_DN73944_c3_g3,TRINITY_DN77296_c1_g1,TRINITY_DN80965_c0_g4,TRINITY_DN82458_c1_g1,TRINITY_DN82502_c0_g1,TRINITY_DN82502_c0_g3,TRINITY_DN86425_c1_g1,TRINITY_DN87713_c1_g2,TRINITY_DN89487_c0_g3,TRINITY_DN94345_c0_g1,TRINITY_DN94349_c0_g2,TRINITY_DN96775_c3_g1,TRINITY_DN97121_c1_g1,TRINITY_DN97667_c3_g2,TRINITY_DN97884_c2_g6,TRINITY_DN98381_c1_g2,TRI…
GO:1901879	regulation of protein depolymerization	biological process	4/609	121/93642	0.00827	0.368055407166124	TRINITY_DN72905_c0_g4,TRINITY_DN77469_c0_g1,TRINITY_DN93760_c2_g1,TRINITY_DN96976_c1_g1	TRINITY_DN72905_c0_g4,TRINITY_DN77469_c0_g1,TRINITY_DN93760_c2_g1,TRINITY_DN96976_c1_g1
GO:0016755	transferase activity, transferring amino-acyl groups	molecular function	3/669	54/102170	0.00541	0.369077205882353	TRINITY_DN78319_c0_g1,TRINITY_DN83600_c0_g1,TRINITY_DN89087_c0_g1	TRINITY_DN78319_c0_g1,TRINITY_DN83600_c0_g1,TRINITY_DN89087_c0_g1
GO:0016871	cycloartenol synthase activity	molecular function	2/669	17/102170	0.00545	0.369077205882353	TRINITY_DN69416_c2_g1,TRINITY_DN96650_c2_g2	TRINITY_DN69416_c2_g1,TRINITY_DN96650_c2_g2
GO:0035198	miRNA binding	molecular function	2/669	17/102170	0.00545	0.369077205882353	TRINITY_DN71424_c1_g2,TRINITY_DN93594_c0_g1	TRINITY_DN71424_c1_g2,TRINITY_DN93594_c0_g1
GO:0040008	regulation of growth	biological process	17/609	1352/93642	0.00833	0.369522045454545	TRINITY_DN70723_c1_g1,TRINITY_DN70911_c2_g1,TRINITY_DN71558_c1_g1,TRINITY_DN73374_c1_g2,TRINITY_DN75411_c0_g3,TRINITY_DN78453_c0_g1,TRINITY_DN81232_c0_g1,TRINITY_DN86504_c0_g1,TRINITY_DN87707_c0_g1,TRINITY_DN89685_c1_g2,TRINITY_DN90609_c0_g3,TRINITY_DN90782_c1_g1,TRINITY_DN90997_c1_g1,TRINITY_DN94365_c2_g2,TRINITY_DN96351_c1_g2,TRINITY_DN97161_c2_g1,TRINITY_DN97232_c2_g1	TRINITY_DN70723_c1_g1,TRINITY_DN70911_c2_g1,TRINITY_DN71558_c1_g1,TRINITY_DN73374_c1_g2,TRINITY_DN75411_c0_g3,TRINITY_DN78453_c0_g1,TRINITY_DN81232_c0_g1,TRINITY_DN86504_c0_g1,TRINITY_DN87707_c0_g1,TRINITY_DN89685_c1_g2,TRINITY_DN90609_c0_g3,TRINITY_DN90782_c1_g1,TRINITY_DN90997_c1_g1,TRINITY_DN94365_c2_g2,TRINITY_DN96351_c1_g2,TRINITY_DN97161_c2_g1,TRINITY_DN97232_c2_g1
GO:0030990	intraciliary transport particle	cellular component	1/648	2/96716	0.01336	0.372508235294118	TRINITY_DN78689_c0_g1	TRINITY_DN78689_c0_g1
GO:0030991	intraciliary transport particle A	cellular component	1/648	2/96716	0.01336	0.372508235294118	TRINITY_DN78689_c0_g1	TRINITY_DN78689_c0_g1
GO:0003843	1,3-beta-D-glucan synthase activity	molecular function	5/669	171/102170	0.00559	0.373071739130435	TRINITY_DN77296_c1_g1,TRINITY_DN86425_c1_g1,TRINITY_DN97121_c1_g1,TRINITY_DN97667_c3_g2,TRINITY_DN98392_c2_g1	TRINITY_DN77296_c1_g1,TRINITY_DN86425_c1_g1,TRINITY_DN97121_c1_g1,TRINITY_DN97667_c3_g2,TRINITY_DN98392_c2_g1
GO:0007049	cell cycle	biological process	44/609	4633/93642	0.00856	0.378496051779935	TRINITY_DN64594_c0_g1,TRINITY_DN68440_c0_g2,TRINITY_DN69726_c2_g1,TRINITY_DN70487_c0_g1,TRINITY_DN73145_c2_g1,TRINITY_DN73615_c0_g1,TRINITY_DN73679_c1_g2,TRINITY_DN75706_c0_g2,TRINITY_DN77234_c1_g2,TRINITY_DN79570_c1_g1,TRINITY_DN80373_c0_g1,TRINITY_DN80532_c2_g2,TRINITY_DN80750_c0_g3,TRINITY_DN80965_c0_g4,TRINITY_DN82458_c1_g1,TRINITY_DN84842_c1_g1,TRINITY_DN85202_c1_g4,TRINITY_DN85222_c1_g2,TRI…	TRINITY_DN64594_c0_g1,TRINITY_DN68440_c0_g2,TRINITY_DN69726_c2_g1,TRINITY_DN70487_c0_g1,TRINITY_DN73145_c2_g1,TRINITY_DN73615_c0_g1,TRINITY_DN73679_c1_g2,TRINITY_DN75706_c0_g2,TRINITY_DN77234_c1_g2,TRINITY_DN79570_c1_g1,TRINITY_DN80373_c0_g1,TRINITY_DN80532_c2_g2,TRINITY_DN80750_c0_g3,TRINITY_DN80965_c0_g4,TRINITY_DN82458_c1_g1,TRINITY_DN84842_c1_g1,TRINITY_DN85202_c1_g4,TRINITY_DN85222_c1_g2,TRI…
GO:1900140	regulation of seedling development	biological process	5/609	192/93642	0.00875	0.384409163987138	TRINITY_DN78319_c0_g1,TRINITY_DN85282_c1_g2,TRINITY_DN86210_c0_g1,TRINITY_DN89102_c1_g1,TRINITY_DN93943_c0_g3	TRINITY_DN78319_c0_g1,TRINITY_DN85282_c1_g2,TRINITY_DN86210_c0_g1,TRINITY_DN89102_c1_g1,TRINITY_DN93943_c0_g3
GO:0042538	hyperosmotic salinity response	biological process	4/609	123/93642	0.00875	0.384409163987138	TRINITY_DN64594_c0_g1,TRINITY_DN82458_c1_g1,TRINITY_DN85282_c1_g2,TRINITY_DN93484_c0_g1	TRINITY_DN64594_c0_g1,TRINITY_DN82458_c1_g1,TRINITY_DN85282_c1_g2,TRINITY_DN93484_c0_g1
GO:0010065	primary meristem tissue development	biological process	3/609	65/93642	0.00887	0.387698503184713	TRINITY_DN74691_c0_g3,TRINITY_DN80004_c0_g1,TRINITY_DN95777_c4_g2	TRINITY_DN74691_c0_g3,TRINITY_DN80004_c0_g1,TRINITY_DN95777_c4_g2
GO:0016573	histone acetylation	biological process	7/609	353/93642	0.00889	0.387698503184713	TRINITY_DN83047_c1_g1,TRINITY_DN91545_c0_g4,TRINITY_DN96368_c1_g3,TRINITY_DN96797_c0_g4,TRINITY_DN97461_c0_g1,TRINITY_DN97461_c0_g2,TRINITY_DN98212_c0_g1	TRINITY_DN83047_c1_g1,TRINITY_DN91545_c0_g4,TRINITY_DN96368_c1_g3,TRINITY_DN96797_c0_g4,TRINITY_DN97461_c0_g1,TRINITY_DN97461_c0_g2,TRINITY_DN98212_c0_g1
GO:0051607	defense response to virus	biological process	6/609	270/93642	0.00891	0.387698503184713	TRINITY_DN71424_c1_g2,TRINITY_DN71889_c1_g1,TRINITY_DN73444_c1_g3,TRINITY_DN74503_c1_g2,TRINITY_DN83048_c1_g1,TRINITY_DN93594_c0_g1	TRINITY_DN71424_c1_g2,TRINITY_DN71889_c1_g1,TRINITY_DN73444_c1_g3,TRINITY_DN74503_c1_g2,TRINITY_DN83048_c1_g1,TRINITY_DN93594_c0_g1
GO:0016104	triterpenoid biosynthetic process	biological process	2/609	22/93642	0.00895	0.388202698412698	TRINITY_DN69416_c2_g1,TRINITY_DN96650_c2_g2	TRINITY_DN69416_c2_g1,TRINITY_DN96650_c2_g2
GO:0019432	triglyceride biosynthetic process	biological process	4/609	124/93642	0.00900	0.389136075949367	TRINITY_DN68792_c0_g1,TRINITY_DN93699_c0_g1,TRINITY_DN94851_c1_g4,TRINITY_DN95629_c0_g1	TRINITY_DN68792_c0_g1,TRINITY_DN93699_c0_g1,TRINITY_DN94851_c1_g4,TRINITY_DN95629_c0_g1
GO:0016040	glutamate synthase (NADH) activity	molecular function	3/669	56/102170	0.00599	0.394056428571429	TRINITY_DN81308_c1_g1,TRINITY_DN96037_c1_g1,TRINITY_DN96704_c2_g2	TRINITY_DN81308_c1_g1,TRINITY_DN96037_c1_g1,TRINITY_DN96704_c2_g2
GO:0009881	photoreceptor activity	molecular function	4/669	110/102170	0.00609	0.394992253521127	TRINITY_DN66987_c0_g1,TRINITY_DN97143_c3_g2,TRINITY_DN97143_c3_g3,TRINITY_DN98591_c5_g2	TRINITY_DN66987_c0_g1,TRINITY_DN97143_c3_g2,TRINITY_DN97143_c3_g3,TRINITY_DN98591_c5_g2
GO:0060966	regulation of gene silencing by RNA	biological process	3/609	66/93642	0.00925	0.398683753943218	TRINITY_DN72819_c0_g1,TRINITY_DN91784_c1_g1,TRINITY_DN95775_c0_g1	TRINITY_DN72819_c0_g1,TRINITY_DN91784_c1_g1,TRINITY_DN95775_c0_g1
GO:0018393	internal peptidyl-lysine acetylation	biological process	7/609	357/93642	0.00942	0.40346539184953	TRINITY_DN83047_c1_g1,TRINITY_DN91545_c0_g4,TRINITY_DN96368_c1_g3,TRINITY_DN96797_c0_g4,TRINITY_DN97461_c0_g1,TRINITY_DN97461_c0_g2,TRINITY_DN98212_c0_g1	TRINITY_DN83047_c1_g1,TRINITY_DN91545_c0_g4,TRINITY_DN96368_c1_g3,TRINITY_DN96797_c0_g4,TRINITY_DN97461_c0_g1,TRINITY_DN97461_c0_g2,TRINITY_DN98212_c0_g1
GO:0018394	peptidyl-lysine acetylation	biological process	7/609	357/93642	0.00942	0.40346539184953	TRINITY_DN83047_c1_g1,TRINITY_DN91545_c0_g4,TRINITY_DN96368_c1_g3,TRINITY_DN96797_c0_g4,TRINITY_DN97461_c0_g1,TRINITY_DN97461_c0_g2,TRINITY_DN98212_c0_g1	TRINITY_DN83047_c1_g1,TRINITY_DN91545_c0_g4,TRINITY_DN96368_c1_g3,TRINITY_DN96797_c0_g4,TRINITY_DN97461_c0_g1,TRINITY_DN97461_c0_g2,TRINITY_DN98212_c0_g1
GO:0071446	cellular response to salicylic acid stimulus	biological process	5/609	196/93642	0.00951	0.405207975077882	TRINITY_DN73324_c3_g1,TRINITY_DN75228_c3_g1,TRINITY_DN85282_c1_g2,TRINITY_DN93940_c0_g3,TRINITY_DN99016_c7_g5	TRINITY_DN73324_c3_g1,TRINITY_DN75228_c3_g1,TRINITY_DN85282_c1_g2,TRINITY_DN93940_c0_g3,TRINITY_DN99016_c7_g5
GO:0044042	glucan metabolic process	biological process	21/609	1826/93642	0.00952	0.405207975077882	TRINITY_DN64594_c0_g1,TRINITY_DN73173_c0_g2,TRINITY_DN73944_c3_g3,TRINITY_DN77296_c1_g1,TRINITY_DN80965_c0_g4,TRINITY_DN82458_c1_g1,TRINITY_DN82502_c0_g1,TRINITY_DN82502_c0_g3,TRINITY_DN86425_c1_g1,TRINITY_DN87713_c1_g2,TRINITY_DN89487_c0_g3,TRINITY_DN94345_c0_g1,TRINITY_DN94349_c0_g2,TRINITY_DN96775_c3_g1,TRINITY_DN97121_c1_g1,TRINITY_DN97667_c3_g2,TRINITY_DN97884_c2_g6,TRINITY_DN98381_c1_g2,TRI…	TRINITY_DN64594_c0_g1,TRINITY_DN73173_c0_g2,TRINITY_DN73944_c3_g3,TRINITY_DN77296_c1_g1,TRINITY_DN80965_c0_g4,TRINITY_DN82458_c1_g1,TRINITY_DN82502_c0_g1,TRINITY_DN82502_c0_g3,TRINITY_DN86425_c1_g1,TRINITY_DN87713_c1_g2,TRINITY_DN89487_c0_g3,TRINITY_DN94345_c0_g1,TRINITY_DN94349_c0_g2,TRINITY_DN96775_c3_g1,TRINITY_DN97121_c1_g1,TRINITY_DN97667_c3_g2,TRINITY_DN97884_c2_g6,TRINITY_DN98381_c1_g2,TRI…
GO:0030787	inositol 4-methyltransferase activity	molecular function	1/669	1/102170	0.00655	0.40760472972973	TRINITY_DN95188_c0_g1	TRINITY_DN95188_c0_g1
GO:0070204	2-succinyl-5-enolpyruvyl-6-hydroxy-3-cyclohexene-1-carboxylic-acid synthase activity	molecular function	1/669	1/102170	0.00655	0.40760472972973	TRINITY_DN87881_c0_g2	TRINITY_DN87881_c0_g2
GO:0070205	2-succinyl-6-hydroxy-2,4-cyclohexadiene-1-carboxylate synthase activity	molecular function	1/669	1/102170	0.00655	0.40760472972973	TRINITY_DN87881_c0_g2	TRINITY_DN87881_c0_g2
GO:0008171	O-methyltransferase activity	molecular function	6/669	252/102170	0.00668	0.410152	TRINITY_DN72604_c1_g1,TRINITY_DN77989_c3_g2,TRINITY_DN80907_c1_g1,TRINITY_DN81440_c1_g1,TRINITY_DN95188_c0_g1,TRINITY_DN95201_c2_g4	TRINITY_DN72604_c1_g1,TRINITY_DN77989_c3_g2,TRINITY_DN80907_c1_g1,TRINITY_DN81440_c1_g1,TRINITY_DN95188_c0_g1,TRINITY_DN95201_c2_g4
GO:0006722	triterpenoid metabolic process	biological process	2/609	23/93642	0.00976	0.412851021671827	TRINITY_DN69416_c2_g1,TRINITY_DN96650_c2_g2	TRINITY_DN69416_c2_g1,TRINITY_DN96650_c2_g2
GO:0031114	regulation of microtubule depolymerization	biological process	2/609	23/93642	0.00976	0.412851021671827	TRINITY_DN77469_c0_g1,TRINITY_DN93760_c2_g1	TRINITY_DN77469_c0_g1,TRINITY_DN93760_c2_g1
GO:0010053	root epidermal cell differentiation	biological process	6/609	276/93642	0.00986	0.415793765432099	TRINITY_DN73679_c0_g1,TRINITY_DN92410_c0_g3,TRINITY_DN92972_c1_g1,TRINITY_DN96030_c0_g1,TRINITY_DN97471_c1_g1,TRINITY_DN97936_c1_g1	TRINITY_DN73679_c0_g1,TRINITY_DN92410_c0_g3,TRINITY_DN92972_c1_g1,TRINITY_DN96030_c0_g1,TRINITY_DN97471_c1_g1,TRINITY_DN97936_c1_g1
GO:0008374	O-acyltransferase activity	molecular function	9/669	510/102170	0.00707	0.428386184210526	TRINITY_DN68792_c0_g1,TRINITY_DN75021_c0_g3,TRINITY_DN81502_c0_g2,TRINITY_DN82528_c0_g1,TRINITY_DN93699_c0_g1,TRINITY_DN94851_c1_g4,TRINITY_DN95629_c0_g1,TRINITY_DN96380_c1_g3,TRINITY_DN97161_c2_g1	TRINITY_DN68792_c0_g1,TRINITY_DN75021_c0_g3,TRINITY_DN81502_c0_g2,TRINITY_DN82528_c0_g1,TRINITY_DN93699_c0_g1,TRINITY_DN94851_c1_g4,TRINITY_DN95629_c0_g1,TRINITY_DN96380_c1_g3,TRINITY_DN97161_c2_g1
GO:0046460	neutral lipid biosynthetic process	biological process	4/609	129/93642	0.01029	0.431264631901841	TRINITY_DN68792_c0_g1,TRINITY_DN93699_c0_g1,TRINITY_DN94851_c1_g4,TRINITY_DN95629_c0_g1	TRINITY_DN68792_c0_g1,TRINITY_DN93699_c0_g1,TRINITY_DN94851_c1_g4,TRINITY_DN95629_c0_g1
GO:0046463	acylglycerol biosynthetic process	biological process	4/609	129/93642	0.01029	0.431264631901841	TRINITY_DN68792_c0_g1,TRINITY_DN93699_c0_g1,TRINITY_DN94851_c1_g4,TRINITY_DN95629_c0_g1	TRINITY_DN68792_c0_g1,TRINITY_DN93699_c0_g1,TRINITY_DN94851_c1_g4,TRINITY_DN95629_c0_g1
GO:0010089	xylem development	biological process	3/609	69/93642	0.01044	0.436213211009174	TRINITY_DN70156_c0_g5,TRINITY_DN88959_c0_g1,TRINITY_DN97262_c0_g2	TRINITY_DN70156_c0_g5,TRINITY_DN88959_c0_g1,TRINITY_DN97262_c0_g2
GO:0019901	protein kinase binding	molecular function	6/669	257/102170	0.00732	0.437774025974026	TRINITY_DN74815_c2_g1,TRINITY_DN86210_c0_g1,TRINITY_DN88225_c4_g1,TRINITY_DN88225_c4_g2,TRINITY_DN91644_c0_g1,TRINITY_DN93943_c0_g3	TRINITY_DN74815_c2_g1,TRINITY_DN86210_c0_g1,TRINITY_DN88225_c4_g1,TRINITY_DN88225_c4_g2,TRINITY_DN91644_c0_g1,TRINITY_DN93943_c0_g3
GO:0004647	phosphoserine phosphatase activity	molecular function	2/669	20/102170	0.00752	0.438349367088608	TRINITY_DN87600_c1_g3,TRINITY_DN97304_c1_g2	TRINITY_DN87600_c1_g3,TRINITY_DN97304_c1_g2
GO:0051010	microtubule plus-end binding	molecular function	2/669	20/102170	0.00752	0.438349367088608	TRINITY_DN77469_c0_g1,TRINITY_DN93760_c2_g1	TRINITY_DN77469_c0_g1,TRINITY_DN93760_c2_g1
GO:0009846	pollen germination	biological process	4/609	130/93642	0.01057	0.440298506097561	TRINITY_DN89072_c1_g3,TRINITY_DN90685_c2_g1,TRINITY_DN94454_c1_g3,TRINITY_DN98259_c2_g3	TRINITY_DN89072_c1_g3,TRINITY_DN90685_c2_g1,TRINITY_DN94454_c1_g3,TRINITY_DN98259_c2_g3
GO:0018205	peptidyl-lysine modification	biological process	12/609	849/93642	0.01068	0.443528389057751	TRINITY_DN68255_c0_g1,TRINITY_DN75121_c0_g4,TRINITY_DN83047_c1_g1,TRINITY_DN89317_c0_g1,TRINITY_DN91545_c0_g4,TRINITY_DN93239_c0_g2,TRINITY_DN94323_c0_g1,TRINITY_DN96368_c1_g3,TRINITY_DN96797_c0_g4,TRINITY_DN97461_c0_g1,TRINITY_DN97461_c0_g2,TRINITY_DN98212_c0_g1	TRINITY_DN68255_c0_g1,TRINITY_DN75121_c0_g4,TRINITY_DN83047_c1_g1,TRINITY_DN89317_c0_g1,TRINITY_DN91545_c0_g4,TRINITY_DN93239_c0_g2,TRINITY_DN94323_c0_g1,TRINITY_DN96368_c1_g3,TRINITY_DN96797_c0_g4,TRINITY_DN97461_c0_g1,TRINITY_DN97461_c0_g2,TRINITY_DN98212_c0_g1
GO:0051015	actin filament binding	molecular function	6/669	260/102170	0.00773	0.444958125	TRINITY_DN72905_c0_g4,TRINITY_DN76839_c0_g1,TRINITY_DN78702_c1_g1,TRINITY_DN88395_c3_g2,TRINITY_DN96976_c1_g1,TRINITY_DN99055_c10_g1	TRINITY_DN72905_c0_g4,TRINITY_DN76839_c0_g1,TRINITY_DN78702_c1_g1,TRINITY_DN88395_c3_g2,TRINITY_DN96976_c1_g1,TRINITY_DN99055_c10_g1
GO:0055028	cortical microtubule	cellular component	3/648	79/96716	0.01625	0.446521739130435	TRINITY_DN73679_c1_g2,TRINITY_DN90376_c0_g3,TRINITY_DN92678_c1_g2	TRINITY_DN73679_c1_g2,TRINITY_DN90376_c0_g3,TRINITY_DN92678_c1_g2
GO:0045181	glutamate synthase activity, NAD(P)H as acceptor	molecular function	3/669	62/102170	0.00794	0.451403703703704	TRINITY_DN81308_c1_g1,TRINITY_DN96037_c1_g1,TRINITY_DN96704_c2_g2	TRINITY_DN81308_c1_g1,TRINITY_DN96037_c1_g1,TRINITY_DN96704_c2_g2
GO:0090626	plant epidermis morphogenesis	biological process	6/609	283/93642	0.01105	0.457503484848485	TRINITY_DN73145_c2_g1,TRINITY_DN73679_c0_g1,TRINITY_DN78801_c1_g1,TRINITY_DN80373_c0_g1,TRINITY_DN97736_c4_g5,TRINITY_DN97736_c4_g6	TRINITY_DN73145_c2_g1,TRINITY_DN73679_c0_g1,TRINITY_DN78801_c1_g1,TRINITY_DN80373_c0_g1,TRINITY_DN97736_c4_g5,TRINITY_DN97736_c4_g6
GO:0006475	internal protein amino acid acetylation	biological process	7/609	369/93642	0.01114	0.459274337349398	TRINITY_DN83047_c1_g1,TRINITY_DN91545_c0_g4,TRINITY_DN96368_c1_g3,TRINITY_DN96797_c0_g4,TRINITY_DN97461_c0_g1,TRINITY_DN97461_c0_g2,TRINITY_DN98212_c0_g1	TRINITY_DN83047_c1_g1,TRINITY_DN91545_c0_g4,TRINITY_DN96368_c1_g3,TRINITY_DN96797_c0_g4,TRINITY_DN97461_c0_g1,TRINITY_DN97461_c0_g2,TRINITY_DN98212_c0_g1
GO:0006075	(1->3)-beta-D-glucan biosynthetic process	biological process	5/609	204/93642	0.01116	0.459274337349398	TRINITY_DN77296_c1_g1,TRINITY_DN86425_c1_g1,TRINITY_DN97121_c1_g1,TRINITY_DN97667_c3_g2,TRINITY_DN98392_c2_g1	TRINITY_DN77296_c1_g1,TRINITY_DN86425_c1_g1,TRINITY_DN97121_c1_g1,TRINITY_DN97667_c3_g2,TRINITY_DN98392_c2_g1
GO:0030915	Smc5-Smc6 complex	cellular component	2/648	30/96716	0.01722	0.45984676056338	TRINITY_DN85202_c1_g4,TRINITY_DN98929_c2_g2	TRINITY_DN85202_c1_g4,TRINITY_DN98929_c2_g2
GO:0106068	SUMO ligase complex	cellular component	2/648	30/96716	0.01722	0.45984676056338	TRINITY_DN85202_c1_g4,TRINITY_DN98929_c2_g2	TRINITY_DN85202_c1_g4,TRINITY_DN98929_c2_g2
GO:0070603	SWI/SNF superfamily-type complex	cellular component	5/648	223/96716	0.01778	0.461445405405405	TRINITY_DN70725_c1_g7,TRINITY_DN82801_c0_g1,TRINITY_DN93850_c1_g5,TRINITY_DN96369_c2_g1,TRINITY_DN96369_c2_g3	TRINITY_DN70725_c1_g7,TRINITY_DN82801_c0_g1,TRINITY_DN93850_c1_g5,TRINITY_DN96369_c2_g1,TRINITY_DN96369_c2_g3
GO:0009535	chloroplast thylakoid membrane	cellular component	10/648	682/96716	0.01801	0.461445405405405	TRINITY_DN74712_c0_g1,TRINITY_DN85213_c0_g1,TRINITY_DN89209_c2_g1,TRINITY_DN89214_c0_g1,TRINITY_DN91033_c2_g2,TRINITY_DN92690_c1_g1,TRINITY_DN92852_c0_g3,TRINITY_DN94476_c1_g1,TRINITY_DN96139_c1_g1,TRINITY_DN97001_c2_g2	TRINITY_DN74712_c0_g1,TRINITY_DN85213_c0_g1,TRINITY_DN89209_c2_g1,TRINITY_DN89214_c0_g1,TRINITY_DN91033_c2_g2,TRINITY_DN92690_c1_g1,TRINITY_DN92852_c0_g3,TRINITY_DN94476_c1_g1,TRINITY_DN96139_c1_g1,TRINITY_DN97001_c2_g2
GO:0055035	plastid thylakoid membrane	cellular component	10/648	682/96716	0.01801	0.461445405405405	TRINITY_DN74712_c0_g1,TRINITY_DN85213_c0_g1,TRINITY_DN89209_c2_g1,TRINITY_DN89214_c0_g1,TRINITY_DN91033_c2_g2,TRINITY_DN92690_c1_g1,TRINITY_DN92852_c0_g3,TRINITY_DN94476_c1_g1,TRINITY_DN96139_c1_g1,TRINITY_DN97001_c2_g2	TRINITY_DN74712_c0_g1,TRINITY_DN85213_c0_g1,TRINITY_DN89209_c2_g1,TRINITY_DN89214_c0_g1,TRINITY_DN91033_c2_g2,TRINITY_DN92690_c1_g1,TRINITY_DN92852_c0_g3,TRINITY_DN94476_c1_g1,TRINITY_DN96139_c1_g1,TRINITY_DN97001_c2_g2
GO:0010216	maintenance of DNA methylation	biological process	3/609	72/93642	0.01171	0.480461651651652	TRINITY_DN83047_c1_g1,TRINITY_DN91545_c0_g4,TRINITY_DN94594_c0_g1	TRINITY_DN83047_c1_g1,TRINITY_DN91545_c0_g4,TRINITY_DN94594_c0_g1
GO:0045229	external encapsulating structure organization	biological process	31/609	3077/93642	0.01196	0.489249940119761	TRINITY_DN64594_c0_g1,TRINITY_DN70584_c0_g4,TRINITY_DN73173_c0_g2,TRINITY_DN73613_c1_g2,TRINITY_DN73944_c3_g3,TRINITY_DN77296_c1_g1,TRINITY_DN78453_c0_g1,TRINITY_DN80065_c0_g3,TRINITY_DN80965_c0_g4,TRINITY_DN82458_c1_g1,TRINITY_DN86350_c0_g1,TRINITY_DN86350_c0_g2,TRINITY_DN86425_c1_g1,TRINITY_DN87713_c1_g2,TRINITY_DN89487_c0_g3,TRINITY_DN90493_c3_g1,TRINITY_DN90918_c0_g2,TRINITY_DN91736_c1_g1,TRI…	TRINITY_DN64594_c0_g1,TRINITY_DN70584_c0_g4,TRINITY_DN73173_c0_g2,TRINITY_DN73613_c1_g2,TRINITY_DN73944_c3_g3,TRINITY_DN77296_c1_g1,TRINITY_DN78453_c0_g1,TRINITY_DN80065_c0_g3,TRINITY_DN80965_c0_g4,TRINITY_DN82458_c1_g1,TRINITY_DN86350_c0_g1,TRINITY_DN86350_c0_g2,TRINITY_DN86425_c1_g1,TRINITY_DN87713_c1_g2,TRINITY_DN89487_c0_g3,TRINITY_DN90493_c3_g1,TRINITY_DN90918_c0_g2,TRINITY_DN91736_c1_g1,TRI…
GO:0048508	embryonic meristem development	biological process	4/609	135/93642	0.01200	0.489420895522388	TRINITY_DN74691_c0_g3,TRINITY_DN80004_c0_g1,TRINITY_DN95777_c4_g2,TRINITY_DN98595_c1_g3	TRINITY_DN74691_c0_g3,TRINITY_DN80004_c0_g1,TRINITY_DN95777_c4_g2,TRINITY_DN98595_c1_g3
GO:0000795	synaptonemal complex	cellular component	2/648	32/96716	0.01947	0.4922016	TRINITY_DN85222_c1_g2,TRINITY_DN97225_c1_g1	TRINITY_DN85222_c1_g2,TRINITY_DN97225_c1_g1
GO:0010073	meristem maintenance	biological process	6/609	289/93642	0.01215	0.492597774480712	TRINITY_DN81232_c0_g1,TRINITY_DN89685_c1_g2,TRINITY_DN90620_c1_g1,TRINITY_DN90685_c2_g1,TRINITY_DN92488_c0_g1,TRINITY_DN98683_c5_g1	TRINITY_DN81232_c0_g1,TRINITY_DN89685_c1_g2,TRINITY_DN90620_c1_g1,TRINITY_DN90685_c2_g1,TRINITY_DN92488_c0_g1,TRINITY_DN98683_c5_g1
GO:0048527	lateral root development	biological process	6/609	289/93642	0.01215	0.492597774480712	TRINITY_DN75411_c0_g3,TRINITY_DN76045_c0_g1,TRINITY_DN87261_c0_g2,TRINITY_DN94649_c0_g3,TRINITY_DN95125_c2_g1,TRINITY_DN96030_c0_g1	TRINITY_DN75411_c0_g3,TRINITY_DN76045_c0_g1,TRINITY_DN87261_c0_g2,TRINITY_DN94649_c0_g3,TRINITY_DN95125_c2_g1,TRINITY_DN96030_c0_g1
GO:0006342	chromatin silencing	biological process	9/609	562/93642	0.01221	0.493565769230769	TRINITY_DN72819_c0_g1,TRINITY_DN83047_c1_g1,TRINITY_DN89410_c0_g2,TRINITY_DN91545_c0_g4,TRINITY_DN91784_c1_g1,TRINITY_DN93339_c1_g1,TRINITY_DN95530_c0_g1,TRINITY_DN95775_c0_g1,TRINITY_DN96581_c2_g1	TRINITY_DN72819_c0_g1,TRINITY_DN83047_c1_g1,TRINITY_DN89410_c0_g2,TRINITY_DN91545_c0_g4,TRINITY_DN91784_c1_g1,TRINITY_DN93339_c1_g1,TRINITY_DN95530_c0_g1,TRINITY_DN95775_c0_g1,TRINITY_DN96581_c2_g1
GO:0071555	cell wall organization	biological process	30/609	2960/93642	0.01232	0.494984122807018	TRINITY_DN64594_c0_g1,TRINITY_DN70584_c0_g4,TRINITY_DN73173_c0_g2,TRINITY_DN73613_c1_g2,TRINITY_DN73944_c3_g3,TRINITY_DN77296_c1_g1,TRINITY_DN78453_c0_g1,TRINITY_DN80065_c0_g3,TRINITY_DN80965_c0_g4,TRINITY_DN82458_c1_g1,TRINITY_DN86350_c0_g1,TRINITY_DN86350_c0_g2,TRINITY_DN86425_c1_g1,TRINITY_DN87713_c1_g2,TRINITY_DN89487_c0_g3,TRINITY_DN90493_c3_g1,TRINITY_DN90918_c0_g2,TRINITY_DN91736_c1_g1,TRI…	TRINITY_DN64594_c0_g1,TRINITY_DN70584_c0_g4,TRINITY_DN73173_c0_g2,TRINITY_DN73613_c1_g2,TRINITY_DN73944_c3_g3,TRINITY_DN77296_c1_g1,TRINITY_DN78453_c0_g1,TRINITY_DN80065_c0_g3,TRINITY_DN80965_c0_g4,TRINITY_DN82458_c1_g1,TRINITY_DN86350_c0_g1,TRINITY_DN86350_c0_g2,TRINITY_DN86425_c1_g1,TRINITY_DN87713_c1_g2,TRINITY_DN89487_c0_g3,TRINITY_DN90493_c3_g1,TRINITY_DN90918_c0_g2,TRINITY_DN91736_c1_g1,TRI…
GO:0016049	cell growth	biological process	19/609	1640/93642	0.01232	0.494984122807018	TRINITY_DN70911_c2_g1,TRINITY_DN73374_c1_g2,TRINITY_DN73679_c0_g1,TRINITY_DN77469_c0_g1,TRINITY_DN78801_c1_g1,TRINITY_DN80373_c0_g1,TRINITY_DN80965_c0_g4,TRINITY_DN86504_c0_g1,TRINITY_DN87707_c0_g1,TRINITY_DN88748_c0_g4,TRINITY_DN89072_c1_g3,TRINITY_DN92410_c0_g3,TRINITY_DN93760_c2_g1,TRINITY_DN96030_c0_g1,TRINITY_DN96351_c1_g2,TRINITY_DN97161_c2_g1,TRINITY_DN97232_c2_g1,TRINITY_DN97936_c1_g1,TRI…	TRINITY_DN70911_c2_g1,TRINITY_DN73374_c1_g2,TRINITY_DN73679_c0_g1,TRINITY_DN77469_c0_g1,TRINITY_DN78801_c1_g1,TRINITY_DN80373_c0_g1,TRINITY_DN80965_c0_g4,TRINITY_DN86504_c0_g1,TRINITY_DN87707_c0_g1,TRINITY_DN88748_c0_g4,TRINITY_DN89072_c1_g3,TRINITY_DN92410_c0_g3,TRINITY_DN93760_c2_g1,TRINITY_DN96030_c0_g1,TRINITY_DN96351_c1_g2,TRINITY_DN97161_c2_g1,TRINITY_DN97232_c2_g1,TRINITY_DN97936_c1_g1,TRI…
GO:0071324	cellular response to disaccharide stimulus	biological process	2/609	26/93642	0.01238	0.494984122807018	TRINITY_DN86210_c0_g1,TRINITY_DN93943_c0_g3	TRINITY_DN86210_c0_g1,TRINITY_DN93943_c0_g3
GO:0043412	macromolecule modification	biological process	79/609	9437/93642	0.01239	0.494984122807018	TRINITY_DN66987_c0_g1,TRINITY_DN68255_c0_g1,TRINITY_DN68434_c0_g1,TRINITY_DN70421_c0_g1,TRINITY_DN71060_c0_g3,TRINITY_DN71554_c0_g1,TRINITY_DN71855_c4_g2,TRINITY_DN72745_c1_g1,TRINITY_DN72819_c0_g1,TRINITY_DN74691_c0_g3,TRINITY_DN75121_c0_g4,TRINITY_DN75376_c0_g1,TRINITY_DN76839_c0_g1,TRINITY_DN77469_c0_g4,TRINITY_DN78319_c0_g1,TRINITY_DN78505_c2_g1,TRINITY_DN78559_c1_g4,TRINITY_DN80004_c0_g1,TRI…	TRINITY_DN66987_c0_g1,TRINITY_DN68255_c0_g1,TRINITY_DN68434_c0_g1,TRINITY_DN70421_c0_g1,TRINITY_DN71060_c0_g3,TRINITY_DN71554_c0_g1,TRINITY_DN71855_c4_g2,TRINITY_DN72745_c1_g1,TRINITY_DN72819_c0_g1,TRINITY_DN74691_c0_g3,TRINITY_DN75121_c0_g4,TRINITY_DN75376_c0_g1,TRINITY_DN76839_c0_g1,TRINITY_DN77469_c0_g4,TRINITY_DN78319_c0_g1,TRINITY_DN78505_c2_g1,TRINITY_DN78559_c1_g4,TRINITY_DN80004_c0_g1,TRI…
GO:0007250	activation of NF-kappaB-inducing kinase activity	biological process	1/609	2/93642	0.01296	0.510295331412104	TRINITY_DN91317_c1_g5	TRINITY_DN91317_c1_g5
GO:0010795	regulation of ubiquinone biosynthetic process	biological process	1/609	2/93642	0.01296	0.510295331412104	TRINITY_DN81921_c0_g1	TRINITY_DN81921_c0_g1
GO:0035721	intraciliary retrograde transport	biological process	1/609	2/93642	0.01296	0.510295331412104	TRINITY_DN78689_c0_g1	TRINITY_DN78689_c0_g1
GO:0042550	photosystem I stabilization	biological process	1/609	2/93642	0.01296	0.510295331412104	TRINITY_DN87881_c0_g2	TRINITY_DN87881_c0_g2
GO:0080114	positive regulation of glycine hydroxymethyltransferase activity	biological process	1/609	2/93642	0.01296	0.510295331412104	TRINITY_DN79475_c1_g2	TRINITY_DN79475_c1_g2
GO:0007019	microtubule depolymerization	biological process	2/609	27/93642	0.01331	0.521073151862464	TRINITY_DN77469_c0_g1,TRINITY_DN93760_c2_g1	TRINITY_DN77469_c0_g1,TRINITY_DN93760_c2_g1
GO:0009649	entrainment of circadian clock	biological process	2/609	27/93642	0.01331	0.521073151862464	TRINITY_DN97143_c3_g2,TRINITY_DN97143_c3_g3	TRINITY_DN97143_c3_g2,TRINITY_DN97143_c3_g3
GO:0055029	nuclear DNA-directed RNA polymerase complex	cellular component	10/648	699/96716	0.02092	0.521898947368421	TRINITY_DN71558_c1_g1,TRINITY_DN72819_c0_g1,TRINITY_DN80520_c0_g1,TRINITY_DN81461_c0_g3,TRINITY_DN84336_c1_g2,TRINITY_DN87600_c1_g3,TRINITY_DN89002_c0_g1,TRINITY_DN91297_c0_g1,TRINITY_DN95775_c0_g1,TRINITY_DN97304_c1_g2	TRINITY_DN71558_c1_g1,TRINITY_DN72819_c0_g1,TRINITY_DN80520_c0_g1,TRINITY_DN81461_c0_g3,TRINITY_DN84336_c1_g2,TRINITY_DN87600_c1_g3,TRINITY_DN89002_c0_g1,TRINITY_DN91297_c0_g1,TRINITY_DN95775_c0_g1,TRINITY_DN97304_c1_g2
GO:0033044	regulation of chromosome organization	biological process	12/609	876/93642	0.01337	0.5219266	TRINITY_DN69726_c2_g1,TRINITY_DN72819_c0_g1,TRINITY_DN75121_c0_g4,TRINITY_DN83047_c1_g1,TRINITY_DN89410_c0_g2,TRINITY_DN91545_c0_g4,TRINITY_DN91784_c1_g1,TRINITY_DN93239_c0_g2,TRINITY_DN93339_c1_g1,TRINITY_DN95775_c0_g1,TRINITY_DN96671_c1_g1,TRINITY_DN98607_c2_g1	TRINITY_DN69726_c2_g1,TRINITY_DN72819_c0_g1,TRINITY_DN75121_c0_g4,TRINITY_DN83047_c1_g1,TRINITY_DN89410_c0_g2,TRINITY_DN91545_c0_g4,TRINITY_DN91784_c1_g1,TRINITY_DN93239_c0_g2,TRINITY_DN93339_c1_g1,TRINITY_DN95775_c0_g1,TRINITY_DN96671_c1_g1,TRINITY_DN98607_c2_g1
GO:1902903	regulation of supramolecular fiber organization	biological process	7/609	384/93642	0.01360	0.528815830985915	TRINITY_DN72905_c0_g4,TRINITY_DN74996_c0_g1,TRINITY_DN77469_c0_g1,TRINITY_DN78801_c1_g1,TRINITY_DN93760_c2_g1,TRINITY_DN96523_c1_g1,TRINITY_DN96976_c1_g1	TRINITY_DN72905_c0_g4,TRINITY_DN74996_c0_g1,TRINITY_DN77469_c0_g1,TRINITY_DN78801_c1_g1,TRINITY_DN93760_c2_g1,TRINITY_DN96523_c1_g1,TRINITY_DN96976_c1_g1
GO:0006641	triglyceride metabolic process	biological process	5/609	215/93642	0.01374	0.528815830985915	TRINITY_DN68792_c0_g1,TRINITY_DN86778_c1_g4,TRINITY_DN93699_c0_g1,TRINITY_DN94851_c1_g4,TRINITY_DN95629_c0_g1	TRINITY_DN68792_c0_g1,TRINITY_DN86778_c1_g4,TRINITY_DN93699_c0_g1,TRINITY_DN94851_c1_g4,TRINITY_DN95629_c0_g1
GO:0048764	trichoblast maturation	biological process	5/609	215/93642	0.01374	0.528815830985915	TRINITY_DN73679_c0_g1,TRINITY_DN92972_c1_g1,TRINITY_DN96030_c0_g1,TRINITY_DN97471_c1_g1,TRINITY_DN97936_c1_g1	TRINITY_DN73679_c0_g1,TRINITY_DN92972_c1_g1,TRINITY_DN96030_c0_g1,TRINITY_DN97471_c1_g1,TRINITY_DN97936_c1_g1
GO:0048765	root hair cell differentiation	biological process	5/609	215/93642	0.01374	0.528815830985915	TRINITY_DN73679_c0_g1,TRINITY_DN92972_c1_g1,TRINITY_DN96030_c0_g1,TRINITY_DN97471_c1_g1,TRINITY_DN97936_c1_g1	TRINITY_DN73679_c0_g1,TRINITY_DN92972_c1_g1,TRINITY_DN96030_c0_g1,TRINITY_DN97471_c1_g1,TRINITY_DN97936_c1_g1
GO:0060918	auxin transport	biological process	5/609	215/93642	0.01374	0.528815830985915	TRINITY_DN74096_c1_g1,TRINITY_DN95710_c3_g2,TRINITY_DN96030_c0_g1,TRINITY_DN97471_c1_g1,TRINITY_DN97936_c1_g1	TRINITY_DN74096_c1_g1,TRINITY_DN95710_c3_g2,TRINITY_DN96030_c0_g1,TRINITY_DN97471_c1_g1,TRINITY_DN97936_c1_g1
GO:0008289	lipid binding	molecular function	21/669	1813/102170	0.00955	0.533736144578313	TRINITY_DN67158_c0_g1,TRINITY_DN70156_c0_g5,TRINITY_DN75037_c1_g1,TRINITY_DN75496_c1_g1,TRINITY_DN76839_c0_g1,TRINITY_DN78702_c1_g1,TRINITY_DN79850_c0_g6,TRINITY_DN82781_c0_g1,TRINITY_DN86344_c0_g1,TRINITY_DN87156_c2_g2,TRINITY_DN87220_c0_g6,TRINITY_DN88395_c3_g2,TRINITY_DN90377_c0_g2,TRINITY_DN90678_c2_g1,TRINITY_DN94066_c0_g1,TRINITY_DN95428_c0_g1,TRINITY_DN95461_c0_g1,TRINITY_DN96734_c0_g3,TRI…	TRINITY_DN67158_c0_g1,TRINITY_DN70156_c0_g5,TRINITY_DN75037_c1_g1,TRINITY_DN75496_c1_g1,TRINITY_DN76839_c0_g1,TRINITY_DN78702_c1_g1,TRINITY_DN79850_c0_g6,TRINITY_DN82781_c0_g1,TRINITY_DN86344_c0_g1,TRINITY_DN87156_c2_g2,TRINITY_DN87220_c0_g6,TRINITY_DN88395_c3_g2,TRINITY_DN90377_c0_g2,TRINITY_DN90678_c2_g1,TRINITY_DN94066_c0_g1,TRINITY_DN95428_c0_g1,TRINITY_DN95461_c0_g1,TRINITY_DN96734_c0_g3,TRI…
GO:0005085	guanyl-nucleotide exchange factor activity	molecular function	7/669	356/102170	0.00962	0.533736144578313	TRINITY_DN74996_c0_g1,TRINITY_DN86504_c0_g1,TRINITY_DN89317_c0_g1,TRINITY_DN96030_c0_g1,TRINITY_DN97143_c3_g2,TRINITY_DN97143_c3_g3,TRINITY_DN98395_c1_g2	TRINITY_DN74996_c0_g1,TRINITY_DN86504_c0_g1,TRINITY_DN89317_c0_g1,TRINITY_DN96030_c0_g1,TRINITY_DN97143_c3_g2,TRINITY_DN97143_c3_g3,TRINITY_DN98395_c1_g2
GO:0045814	negative regulation of gene expression, epigenetic	biological process	9/609	575/93642	0.01397	0.535421204481793	TRINITY_DN72819_c0_g1,TRINITY_DN83047_c1_g1,TRINITY_DN89410_c0_g2,TRINITY_DN91545_c0_g4,TRINITY_DN91784_c1_g1,TRINITY_DN93339_c1_g1,TRINITY_DN95530_c0_g1,TRINITY_DN95775_c0_g1,TRINITY_DN96581_c2_g1	TRINITY_DN72819_c0_g1,TRINITY_DN83047_c1_g1,TRINITY_DN89410_c0_g2,TRINITY_DN91545_c0_g4,TRINITY_DN91784_c1_g1,TRINITY_DN93339_c1_g1,TRINITY_DN95530_c0_g1,TRINITY_DN95775_c0_g1,TRINITY_DN96581_c2_g1
GO:0006074	(1->3)-beta-D-glucan metabolic process	biological process	5/609	216/93642	0.01399	0.535421204481793	TRINITY_DN77296_c1_g1,TRINITY_DN86425_c1_g1,TRINITY_DN97121_c1_g1,TRINITY_DN97667_c3_g2,TRINITY_DN98392_c2_g1	TRINITY_DN77296_c1_g1,TRINITY_DN86425_c1_g1,TRINITY_DN97121_c1_g1,TRINITY_DN97667_c3_g2,TRINITY_DN98392_c2_g1
GO:0004611	phosphoenolpyruvate carboxykinase activity	molecular function	3/669	67/102170	0.00982	0.538346428571429	TRINITY_DN85031_c0_g2,TRINITY_DN90512_c0_g2,TRINITY_DN93398_c0_g1	TRINITY_DN85031_c0_g2,TRINITY_DN90512_c0_g2,TRINITY_DN93398_c0_g1
GO:0010260	animal organ senescence	biological process	2/609	28/93642	0.01427	0.538593950276243	TRINITY_DN91758_c3_g4,TRINITY_DN95511_c3_g4	TRINITY_DN91758_c3_g4,TRINITY_DN95511_c3_g4
GO:0043478	pigment accumulation in response to UV light	biological process	2/609	28/93642	0.01427	0.538593950276243	TRINITY_DN74096_c1_g1,TRINITY_DN95710_c3_g2	TRINITY_DN74096_c1_g1,TRINITY_DN95710_c3_g2
GO:0043479	pigment accumulation in tissues in response to UV light	biological process	2/609	28/93642	0.01427	0.538593950276243	TRINITY_DN74096_c1_g1,TRINITY_DN95710_c3_g2	TRINITY_DN74096_c1_g1,TRINITY_DN95710_c3_g2
GO:0043480	pigment accumulation in tissues	biological process	2/609	28/93642	0.01427	0.538593950276243	TRINITY_DN74096_c1_g1,TRINITY_DN95710_c3_g2	TRINITY_DN74096_c1_g1,TRINITY_DN95710_c3_g2
GO:0043481	anthocyanin accumulation in tissues in response to UV light	biological process	2/609	28/93642	0.01427	0.538593950276243	TRINITY_DN74096_c1_g1,TRINITY_DN95710_c3_g2	TRINITY_DN74096_c1_g1,TRINITY_DN95710_c3_g2
GO:0032989	cellular component morphogenesis	biological process	24/609	2260/93642	0.01436	0.540497741046832	TRINITY_DN70911_c2_g1,TRINITY_DN73145_c2_g1,TRINITY_DN73374_c1_g2,TRINITY_DN73679_c0_g1,TRINITY_DN74996_c0_g1,TRINITY_DN77296_c1_g1,TRINITY_DN78801_c1_g1,TRINITY_DN80373_c0_g1,TRINITY_DN86425_c1_g1,TRINITY_DN86504_c0_g1,TRINITY_DN87707_c0_g1,TRINITY_DN88188_c0_g5,TRINITY_DN88748_c0_g4,TRINITY_DN89072_c1_g3,TRINITY_DN92410_c0_g3,TRINITY_DN93254_c0_g1,TRINITY_DN96030_c0_g1,TRINITY_DN97121_c1_g1,TRI…	TRINITY_DN70911_c2_g1,TRINITY_DN73145_c2_g1,TRINITY_DN73374_c1_g2,TRINITY_DN73679_c0_g1,TRINITY_DN74996_c0_g1,TRINITY_DN77296_c1_g1,TRINITY_DN78801_c1_g1,TRINITY_DN80373_c0_g1,TRINITY_DN86425_c1_g1,TRINITY_DN86504_c0_g1,TRINITY_DN87707_c0_g1,TRINITY_DN88188_c0_g5,TRINITY_DN88748_c0_g4,TRINITY_DN89072_c1_g3,TRINITY_DN92410_c0_g3,TRINITY_DN93254_c0_g1,TRINITY_DN96030_c0_g1,TRINITY_DN97121_c1_g1,TRI…
GO:0010054	trichoblast differentiation	biological process	5/609	218/93642	0.01450	0.544267857142857	TRINITY_DN73679_c0_g1,TRINITY_DN92972_c1_g1,TRINITY_DN96030_c0_g1,TRINITY_DN97471_c1_g1,TRINITY_DN97936_c1_g1	TRINITY_DN73679_c0_g1,TRINITY_DN92972_c1_g1,TRINITY_DN96030_c0_g1,TRINITY_DN97471_c1_g1,TRINITY_DN97936_c1_g1
GO:0030154	cell differentiation	biological process	37/609	3890/93642	0.01482	0.554755232876712	TRINITY_DN70156_c0_g5,TRINITY_DN70911_c2_g1,TRINITY_DN73145_c2_g1,TRINITY_DN73374_c1_g2,TRINITY_DN73679_c0_g1,TRINITY_DN74691_c0_g3,TRINITY_DN78801_c1_g1,TRINITY_DN80004_c0_g1,TRINITY_DN80373_c0_g1,TRINITY_DN82801_c0_g1,TRINITY_DN84175_c3_g2,TRINITY_DN84523_c1_g1,TRINITY_DN86344_c0_g1,TRINITY_DN86504_c0_g1,TRINITY_DN87544_c1_g3,TRINITY_DN87707_c0_g1,TRINITY_DN88188_c0_g5,TRINITY_DN88748_c0_g4,TRI…	TRINITY_DN70156_c0_g5,TRINITY_DN70911_c2_g1,TRINITY_DN73145_c2_g1,TRINITY_DN73374_c1_g2,TRINITY_DN73679_c0_g1,TRINITY_DN74691_c0_g3,TRINITY_DN78801_c1_g1,TRINITY_DN80004_c0_g1,TRINITY_DN80373_c0_g1,TRINITY_DN82801_c0_g1,TRINITY_DN84175_c3_g2,TRINITY_DN84523_c1_g1,TRINITY_DN86344_c0_g1,TRINITY_DN86504_c0_g1,TRINITY_DN87544_c1_g3,TRINITY_DN87707_c0_g1,TRINITY_DN88188_c0_g5,TRINITY_DN88748_c0_g4,TRI…
GO:0004630	phospholipase D activity	molecular function	3/669	69/102170	0.01063	0.555704494382022	TRINITY_DN91464_c3_g1,TRINITY_DN95123_c1_g2,TRINITY_DN98434_c2_g2	TRINITY_DN91464_c3_g1,TRINITY_DN95123_c1_g2,TRINITY_DN98434_c2_g2
GO:0008240	tripeptidyl-peptidase activity	molecular function	2/669	24/102170	0.01074	0.555704494382022	TRINITY_DN76787_c0_g1,TRINITY_DN77910_c1_g1	TRINITY_DN76787_c0_g1,TRINITY_DN77910_c1_g1
GO:0016781	phosphotransferase activity, paired acceptors	molecular function	2/669	24/102170	0.01074	0.555704494382022	TRINITY_DN87843_c0_g2,TRINITY_DN95789_c0_g4	TRINITY_DN87843_c0_g2,TRINITY_DN95789_c0_g4
GO:0047196	long-chain-alcohol O-fatty-acyltransferase activity	molecular function	2/669	24/102170	0.01074	0.555704494382022	TRINITY_DN93699_c0_g1,TRINITY_DN94851_c1_g4	TRINITY_DN93699_c0_g1,TRINITY_DN94851_c1_g4
GO:0047259	glucomannan 4-beta-mannosyltransferase activity	molecular function	2/669	24/102170	0.01074	0.555704494382022	TRINITY_DN91742_c0_g3,TRINITY_DN91813_c0_g2	TRINITY_DN91742_c0_g3,TRINITY_DN91813_c0_g2
GO:0000428	DNA-directed RNA polymerase complex	cellular component	10/648	708/96716	0.02259	0.556242077922078	TRINITY_DN71558_c1_g1,TRINITY_DN72819_c0_g1,TRINITY_DN80520_c0_g1,TRINITY_DN81461_c0_g3,TRINITY_DN84336_c1_g2,TRINITY_DN87600_c1_g3,TRINITY_DN89002_c0_g1,TRINITY_DN91297_c0_g1,TRINITY_DN95775_c0_g1,TRINITY_DN97304_c1_g2	TRINITY_DN71558_c1_g1,TRINITY_DN72819_c0_g1,TRINITY_DN80520_c0_g1,TRINITY_DN81461_c0_g3,TRINITY_DN84336_c1_g2,TRINITY_DN87600_c1_g3,TRINITY_DN89002_c0_g1,TRINITY_DN91297_c0_g1,TRINITY_DN95775_c0_g1,TRINITY_DN97304_c1_g2
GO:0016051	carbohydrate biosynthetic process	biological process	21/609	1909/93642	0.01494	0.557316376021798	TRINITY_DN64594_c0_g1,TRINITY_DN73173_c0_g2,TRINITY_DN73944_c3_g3,TRINITY_DN77296_c1_g1,TRINITY_DN80965_c0_g4,TRINITY_DN82458_c1_g1,TRINITY_DN86425_c1_g1,TRINITY_DN89487_c0_g3,TRINITY_DN90512_c0_g2,TRINITY_DN91323_c1_g5,TRINITY_DN91736_c1_g1,TRINITY_DN94345_c0_g1,TRINITY_DN94349_c0_g2,TRINITY_DN96216_c0_g1,TRINITY_DN96775_c3_g1,TRINITY_DN96892_c2_g1,TRINITY_DN97121_c1_g1,TRINITY_DN97667_c3_g2,TRI…	TRINITY_DN64594_c0_g1,TRINITY_DN73173_c0_g2,TRINITY_DN73944_c3_g3,TRINITY_DN77296_c1_g1,TRINITY_DN80965_c0_g4,TRINITY_DN82458_c1_g1,TRINITY_DN86425_c1_g1,TRINITY_DN89487_c0_g3,TRINITY_DN90512_c0_g2,TRINITY_DN91323_c1_g5,TRINITY_DN91736_c1_g1,TRINITY_DN94345_c0_g1,TRINITY_DN94349_c0_g2,TRINITY_DN96216_c0_g1,TRINITY_DN96775_c3_g1,TRINITY_DN96892_c2_g1,TRINITY_DN97121_c1_g1,TRINITY_DN97667_c3_g2,TRI…
GO:0032535	regulation of cellular component size	biological process	10/609	682/93642	0.01497	0.557316376021798	TRINITY_DN72905_c0_g4,TRINITY_DN74096_c1_g1,TRINITY_DN74996_c0_g1,TRINITY_DN77049_c0_g3,TRINITY_DN78801_c1_g1,TRINITY_DN81058_c1_g3,TRINITY_DN86879_c0_g3,TRINITY_DN95710_c3_g2,TRINITY_DN96523_c1_g1,TRINITY_DN96976_c1_g1	TRINITY_DN72905_c0_g4,TRINITY_DN74096_c1_g1,TRINITY_DN74996_c0_g1,TRINITY_DN77049_c0_g3,TRINITY_DN78801_c1_g1,TRINITY_DN81058_c1_g3,TRINITY_DN86879_c0_g3,TRINITY_DN95710_c3_g2,TRINITY_DN96523_c1_g1,TRINITY_DN96976_c1_g1
GO:0030880	RNA polymerase complex	cellular component	10/648	710/96716	0.02297	0.558347692307692	TRINITY_DN71558_c1_g1,TRINITY_DN72819_c0_g1,TRINITY_DN80520_c0_g1,TRINITY_DN81461_c0_g3,TRINITY_DN84336_c1_g2,TRINITY_DN87600_c1_g3,TRINITY_DN89002_c0_g1,TRINITY_DN91297_c0_g1,TRINITY_DN95775_c0_g1,TRINITY_DN97304_c1_g2	TRINITY_DN71558_c1_g1,TRINITY_DN72819_c0_g1,TRINITY_DN80520_c0_g1,TRINITY_DN81461_c0_g3,TRINITY_DN84336_c1_g2,TRINITY_DN87600_c1_g3,TRINITY_DN89002_c0_g1,TRINITY_DN91297_c0_g1,TRINITY_DN95775_c0_g1,TRINITY_DN97304_c1_g2
GO:2000652	regulation of secondary cell wall biogenesis	biological process	2/609	29/93642	0.01526	0.566568967391304	TRINITY_DN80415_c0_g1,TRINITY_DN88959_c0_g1	TRINITY_DN80415_c0_g1,TRINITY_DN88959_c0_g1
GO:0009639	response to red or far red light	biological process	8/609	487/93642	0.01534	0.567995718157182	TRINITY_DN66987_c0_g1,TRINITY_DN74096_c1_g1,TRINITY_DN78453_c0_g1,TRINITY_DN84523_c1_g1,TRINITY_DN87544_c1_g3,TRINITY_DN93209_c1_g1,TRINITY_DN95710_c3_g2,TRINITY_DN98591_c5_g2	TRINITY_DN66987_c0_g1,TRINITY_DN74096_c1_g1,TRINITY_DN78453_c0_g1,TRINITY_DN84523_c1_g1,TRINITY_DN87544_c1_g3,TRINITY_DN93209_c1_g1,TRINITY_DN95710_c3_g2,TRINITY_DN98591_c5_g2
GO:0008964	phosphoenolpyruvate carboxylase activity	molecular function	2/669	25/102170	0.01162	0.577838942307692	TRINITY_DN85031_c0_g2,TRINITY_DN93398_c0_g1	TRINITY_DN85031_c0_g2,TRINITY_DN93398_c0_g1
GO:0031559	oxidosqualene cyclase activity	molecular function	2/669	26/102170	0.01254	0.577838942307692	TRINITY_DN69416_c2_g1,TRINITY_DN96650_c2_g2	TRINITY_DN69416_c2_g1,TRINITY_DN96650_c2_g2
GO:0047763	caffeate O-methyltransferase activity	molecular function	2/669	26/102170	0.01254	0.577838942307692	TRINITY_DN72604_c1_g1,TRINITY_DN81440_c1_g1	TRINITY_DN72604_c1_g1,TRINITY_DN81440_c1_g1
GO:0001093	TFIIB-class transcription factor binding	molecular function	1/669	2/102170	0.01305	0.577838942307692	TRINITY_DN94454_c1_g3	TRINITY_DN94454_c1_g3
GO:0005164	tumor necrosis factor receptor binding	molecular function	1/669	2/102170	0.01305	0.577838942307692	TRINITY_DN91317_c1_g5	TRINITY_DN91317_c1_g5
GO:0031996	thioesterase binding	molecular function	1/669	2/102170	0.01305	0.577838942307692	TRINITY_DN91317_c1_g5	TRINITY_DN91317_c1_g5
GO:0032813	tumor necrosis factor receptor superfamily binding	molecular function	1/669	2/102170	0.01305	0.577838942307692	TRINITY_DN91317_c1_g5	TRINITY_DN91317_c1_g5
GO:0052668	farnesol kinase activity	molecular function	1/669	2/102170	0.01305	0.577838942307692	TRINITY_DN85750_c2_g1	TRINITY_DN85750_c2_g1
GO:0052669	CTP:2-trans,-6-trans-farnesol kinase activity	molecular function	1/669	2/102170	0.01305	0.577838942307692	TRINITY_DN85750_c2_g1	TRINITY_DN85750_c2_g1
GO:0052670	geraniol kinase activity	molecular function	1/669	2/102170	0.01305	0.577838942307692	TRINITY_DN85750_c2_g1	TRINITY_DN85750_c2_g1
GO:0052671	geranylgeraniol kinase activity	molecular function	1/669	2/102170	0.01305	0.577838942307692	TRINITY_DN85750_c2_g1	TRINITY_DN85750_c2_g1
GO:0052673	prenol kinase activity	molecular function	1/669	2/102170	0.01305	0.577838942307692	TRINITY_DN85750_c2_g1	TRINITY_DN85750_c2_g1
GO:0070878	primary miRNA binding	molecular function	1/669	2/102170	0.01305	0.577838942307692	TRINITY_DN70723_c1_g1	TRINITY_DN70723_c1_g1
GO:0070883	pre-miRNA binding	molecular function	1/669	2/102170	0.01305	0.577838942307692	TRINITY_DN70723_c1_g1	TRINITY_DN70723_c1_g1
GO:0102251	all-trans-beta-apo-10'-carotenal cleavage oxygenase activity	molecular function	1/669	2/102170	0.01305	0.577838942307692	TRINITY_DN74872_c1_g1	TRINITY_DN74872_c1_g1
GO:0022402	cell cycle process	biological process	32/609	3272/93642	0.01583	0.584554837837838	TRINITY_DN64594_c0_g1,TRINITY_DN69726_c2_g1,TRINITY_DN73145_c2_g1,TRINITY_DN73679_c1_g2,TRINITY_DN75706_c0_g2,TRINITY_DN77234_c1_g2,TRINITY_DN79570_c1_g1,TRINITY_DN80373_c0_g1,TRINITY_DN80532_c2_g2,TRINITY_DN80965_c0_g4,TRINITY_DN82458_c1_g1,TRINITY_DN84842_c1_g1,TRINITY_DN85202_c1_g4,TRINITY_DN85222_c1_g2,TRINITY_DN89487_c0_g3,TRINITY_DN92330_c1_g2,TRINITY_DN93699_c0_g1,TRINITY_DN94594_c0_g1,TRI…	TRINITY_DN64594_c0_g1,TRINITY_DN69726_c2_g1,TRINITY_DN73145_c2_g1,TRINITY_DN73679_c1_g2,TRINITY_DN75706_c0_g2,TRINITY_DN77234_c1_g2,TRINITY_DN79570_c1_g1,TRINITY_DN80373_c0_g1,TRINITY_DN80532_c2_g2,TRINITY_DN80965_c0_g4,TRINITY_DN82458_c1_g1,TRINITY_DN84842_c1_g1,TRINITY_DN85202_c1_g4,TRINITY_DN85222_c1_g2,TRINITY_DN89487_c0_g3,TRINITY_DN92330_c1_g2,TRINITY_DN93699_c0_g1,TRINITY_DN94594_c0_g1,TRI…
GO:0090627	plant epidermal cell differentiation	biological process	6/609	307/93642	0.01592	0.586293692722372	TRINITY_DN73679_c0_g1,TRINITY_DN92410_c0_g3,TRINITY_DN92972_c1_g1,TRINITY_DN96030_c0_g1,TRINITY_DN97471_c1_g1,TRINITY_DN97936_c1_g1	TRINITY_DN73679_c0_g1,TRINITY_DN92410_c0_g3,TRINITY_DN92972_c1_g1,TRINITY_DN96030_c0_g1,TRINITY_DN97471_c1_g1,TRINITY_DN97936_c1_g1
GO:0033993	response to lipid	biological process	22/609	2042/93642	0.01603	0.588757768817204	TRINITY_DN71958_c2_g1,TRINITY_DN72303_c0_g1,TRINITY_DN72989_c0_g1,TRINITY_DN74568_c0_g3,TRINITY_DN75340_c0_g3,TRINITY_DN77049_c0_g3,TRINITY_DN77929_c0_g2,TRINITY_DN78319_c0_g1,TRINITY_DN85282_c1_g2,TRINITY_DN85750_c2_g1,TRINITY_DN85946_c2_g2,TRINITY_DN86079_c0_g1,TRINITY_DN87533_c3_g4,TRINITY_DN89102_c1_g1,TRINITY_DN91464_c3_g1,TRINITY_DN91644_c0_g1,TRINITY_DN91758_c3_g4,TRINITY_DN92690_c1_g1,TRI…	TRINITY_DN71958_c2_g1,TRINITY_DN72303_c0_g1,TRINITY_DN72989_c0_g1,TRINITY_DN74568_c0_g3,TRINITY_DN75340_c0_g3,TRINITY_DN77049_c0_g3,TRINITY_DN77929_c0_g2,TRINITY_DN78319_c0_g1,TRINITY_DN85282_c1_g2,TRINITY_DN85750_c2_g1,TRINITY_DN85946_c2_g2,TRINITY_DN86079_c0_g1,TRINITY_DN87533_c3_g4,TRINITY_DN89102_c1_g1,TRINITY_DN91464_c3_g1,TRINITY_DN91644_c0_g1,TRINITY_DN91758_c3_g4,TRINITY_DN92690_c1_g1,TRI…
GO:0031977	thylakoid lumen	cellular component	3/648	93/96716	0.02491	0.59784	TRINITY_DN86969_c1_g2,TRINITY_DN92690_c1_g1,TRINITY_DN97445_c4_g1	TRINITY_DN86969_c1_g2,TRINITY_DN92690_c1_g1,TRINITY_DN97445_c4_g1
GO:0080092	regulation of pollen tube growth	biological process	5/609	225/93642	0.01640	0.600732439678284	TRINITY_DN70911_c2_g1,TRINITY_DN73374_c1_g2,TRINITY_DN86504_c0_g1,TRINITY_DN87707_c0_g1,TRINITY_DN97161_c2_g1	TRINITY_DN70911_c2_g1,TRINITY_DN73374_c1_g2,TRINITY_DN86504_c0_g1,TRINITY_DN87707_c0_g1,TRINITY_DN97161_c2_g1
GO:0006950	response to stress	biological process	122/609	15618/93642	0.01647	0.601683449197861	TRINITY_DN64594_c0_g1,TRINITY_DN67158_c0_g1,TRINITY_DN70626_c0_g2,TRINITY_DN71424_c1_g2,TRINITY_DN71558_c1_g1,TRINITY_DN71889_c1_g1,TRINITY_DN73130_c0_g1,TRINITY_DN73324_c3_g1,TRINITY_DN73363_c2_g1,TRINITY_DN73444_c1_g3,TRINITY_DN73575_c3_g3,TRINITY_DN74503_c1_g2,TRINITY_DN74684_c0_g2,TRINITY_DN75121_c0_g4,TRINITY_DN75228_c3_g1,TRINITY_DN75340_c0_g3,TRINITY_DN75619_c0_g1,TRINITY_DN75761_c2_g1,TRI…	TRINITY_DN64594_c0_g1,TRINITY_DN67158_c0_g1,TRINITY_DN70626_c0_g2,TRINITY_DN71424_c1_g2,TRINITY_DN71558_c1_g1,TRINITY_DN71889_c1_g1,TRINITY_DN73130_c0_g1,TRINITY_DN73324_c3_g1,TRINITY_DN73363_c2_g1,TRINITY_DN73444_c1_g3,TRINITY_DN73575_c3_g3,TRINITY_DN74503_c1_g2,TRINITY_DN74684_c0_g2,TRINITY_DN75121_c0_g4,TRINITY_DN75228_c3_g1,TRINITY_DN75340_c0_g3,TRINITY_DN75619_c0_g1,TRINITY_DN75761_c2_g1,TRI…
GO:0051020	GTPase binding	molecular function	10/669	669/102170	0.01387	0.608298571428571	TRINITY_DN71306_c1_g4,TRINITY_DN74996_c0_g1,TRINITY_DN77099_c0_g1,TRINITY_DN86504_c0_g1,TRINITY_DN89317_c0_g1,TRINITY_DN91167_c0_g1,TRINITY_DN96030_c0_g1,TRINITY_DN97143_c3_g2,TRINITY_DN97143_c3_g3,TRINITY_DN98395_c1_g2	TRINITY_DN71306_c1_g4,TRINITY_DN74996_c0_g1,TRINITY_DN77099_c0_g1,TRINITY_DN86504_c0_g1,TRINITY_DN89317_c0_g1,TRINITY_DN91167_c0_g1,TRINITY_DN96030_c0_g1,TRINITY_DN97143_c3_g2,TRINITY_DN97143_c3_g3,TRINITY_DN98395_c1_g2
GO:0010025	wax biosynthetic process	biological process	3/609	83/93642	0.01713	0.62412584	TRINITY_DN71889_c1_g1,TRINITY_DN74503_c1_g2,TRINITY_DN94851_c1_g4	TRINITY_DN71889_c1_g1,TRINITY_DN74503_c1_g2,TRINITY_DN94851_c1_g4
GO:0010333	terpene synthase activity	molecular function	4/669	142/102170	0.01455	0.63210141509434	TRINITY_DN73654_c0_g1,TRINITY_DN77743_c0_g1,TRINITY_DN90070_c0_g1,TRINITY_DN91427_c0_g1	TRINITY_DN73654_c0_g1,TRINITY_DN77743_c0_g1,TRINITY_DN90070_c0_g1,TRINITY_DN91427_c0_g1
GO:0019899	enzyme binding	molecular function	22/669	2010/102170	0.01471	0.633079906542056	TRINITY_DN71306_c1_g4,TRINITY_DN74815_c2_g1,TRINITY_DN74996_c0_g1,TRINITY_DN77049_c0_g3,TRINITY_DN77099_c0_g1,TRINITY_DN77433_c0_g1,TRINITY_DN78559_c1_g4,TRINITY_DN86210_c0_g1,TRINITY_DN86504_c0_g1,TRINITY_DN88225_c4_g1,TRINITY_DN88225_c4_g2,TRINITY_DN89317_c0_g1,TRINITY_DN90634_c0_g3,TRINITY_DN91167_c0_g1,TRINITY_DN91317_c1_g5,TRINITY_DN91644_c0_g1,TRINITY_DN93943_c0_g3,TRINITY_DN94454_c1_g3,TRI…	TRINITY_DN71306_c1_g4,TRINITY_DN74815_c2_g1,TRINITY_DN74996_c0_g1,TRINITY_DN77049_c0_g3,TRINITY_DN77099_c0_g1,TRINITY_DN77433_c0_g1,TRINITY_DN78559_c1_g4,TRINITY_DN86210_c0_g1,TRINITY_DN86504_c0_g1,TRINITY_DN88225_c4_g1,TRINITY_DN88225_c4_g2,TRINITY_DN89317_c0_g1,TRINITY_DN90634_c0_g3,TRINITY_DN91167_c0_g1,TRINITY_DN91317_c1_g5,TRINITY_DN91644_c0_g1,TRINITY_DN93943_c0_g3,TRINITY_DN94454_c1_g3,TRI…
GO:0010817	regulation of hormone levels	biological process	14/609	1129/93642	0.01745	0.634094015957447	TRINITY_DN70487_c0_g1,TRINITY_DN73130_c0_g1,TRINITY_DN74096_c1_g1,TRINITY_DN74872_c1_g1,TRINITY_DN75340_c0_g2,TRINITY_DN75340_c0_g3,TRINITY_DN78453_c0_g1,TRINITY_DN90620_c1_g1,TRINITY_DN90788_c0_g2,TRINITY_DN91821_c1_g1,TRINITY_DN95710_c3_g2,TRINITY_DN96030_c0_g1,TRINITY_DN97471_c1_g1,TRINITY_DN97936_c1_g1	TRINITY_DN70487_c0_g1,TRINITY_DN73130_c0_g1,TRINITY_DN74096_c1_g1,TRINITY_DN74872_c1_g1,TRINITY_DN75340_c0_g2,TRINITY_DN75340_c0_g3,TRINITY_DN78453_c0_g1,TRINITY_DN90620_c1_g1,TRINITY_DN90788_c0_g2,TRINITY_DN91821_c1_g1,TRINITY_DN95710_c3_g2,TRINITY_DN96030_c0_g1,TRINITY_DN97471_c1_g1,TRINITY_DN97936_c1_g1
GO:0048037	cofactor binding	molecular function	73/669	8621/102170	0.01491	0.635745833333333	TRINITY_DN67158_c0_g1,TRINITY_DN68475_c0_g1,TRINITY_DN68475_c0_g3,TRINITY_DN70599_c1_g1,TRINITY_DN70599_c1_g3,TRINITY_DN70885_c1_g1,TRINITY_DN71005_c0_g6,TRINITY_DN71061_c2_g3,TRINITY_DN72866_c0_g3,TRINITY_DN74684_c0_g2,TRINITY_DN75037_c1_g1,TRINITY_DN75228_c3_g1,TRINITY_DN75340_c0_g2,TRINITY_DN75340_c0_g3,TRINITY_DN76611_c0_g2,TRINITY_DN77442_c1_g3,TRINITY_DN78453_c0_g1,TRINITY_DN79475_c1_g2,TRI…	TRINITY_DN67158_c0_g1,TRINITY_DN68475_c0_g1,TRINITY_DN68475_c0_g3,TRINITY_DN70599_c1_g1,TRINITY_DN70599_c1_g3,TRINITY_DN70885_c1_g1,TRINITY_DN71005_c0_g6,TRINITY_DN71061_c2_g3,TRINITY_DN72866_c0_g3,TRINITY_DN74684_c0_g2,TRINITY_DN75037_c1_g1,TRINITY_DN75228_c3_g1,TRINITY_DN75340_c0_g2,TRINITY_DN75340_c0_g3,TRINITY_DN76611_c0_g2,TRINITY_DN77442_c1_g3,TRINITY_DN78453_c0_g1,TRINITY_DN79475_c1_g2,TRI…
GO:0099086	synaptonemal structure	cellular component	2/648	38/96716	0.02687	0.636819	TRINITY_DN85222_c1_g2,TRINITY_DN97225_c1_g1	TRINITY_DN85222_c1_g2,TRINITY_DN97225_c1_g1
GO:0006996	organelle organization	biological process	82/609	10008/93642	0.01768	0.640747586206897	TRINITY_DN68255_c0_g1,TRINITY_DN69726_c2_g1,TRINITY_DN70725_c1_g7,TRINITY_DN71824_c1_g1,TRINITY_DN71855_c4_g2,TRINITY_DN72819_c0_g1,TRINITY_DN72905_c0_g4,TRINITY_DN73679_c1_g2,TRINITY_DN74568_c0_g3,TRINITY_DN74712_c0_g1,TRINITY_DN74996_c0_g1,TRINITY_DN75121_c0_g4,TRINITY_DN77169_c0_g2,TRINITY_DN77234_c1_g2,TRINITY_DN77433_c0_g1,TRINITY_DN77469_c0_g1,TRINITY_DN78240_c2_g4,TRINITY_DN78689_c0_g1,TRI…	TRINITY_DN68255_c0_g1,TRINITY_DN69726_c2_g1,TRINITY_DN70725_c1_g7,TRINITY_DN71824_c1_g1,TRINITY_DN71855_c4_g2,TRINITY_DN72819_c0_g1,TRINITY_DN72905_c0_g4,TRINITY_DN73679_c1_g2,TRINITY_DN74568_c0_g3,TRINITY_DN74712_c0_g1,TRINITY_DN74996_c0_g1,TRINITY_DN75121_c0_g4,TRINITY_DN77169_c0_g2,TRINITY_DN77234_c1_g2,TRINITY_DN77433_c0_g1,TRINITY_DN77469_c0_g1,TRINITY_DN78240_c2_g4,TRINITY_DN78689_c0_g1,TRI…
GO:0048581	negative regulation of post-embryonic development	biological process	5/609	230/93642	0.01786	0.645558677248677	TRINITY_DN75121_c0_g4,TRINITY_DN82801_c0_g1,TRINITY_DN84175_c3_g2,TRINITY_DN85282_c1_g2,TRINITY_DN94594_c0_g1	TRINITY_DN75121_c0_g4,TRINITY_DN82801_c0_g1,TRINITY_DN84175_c3_g2,TRINITY_DN85282_c1_g2,TRINITY_DN94594_c0_g1
GO:0006638	neutral lipid metabolic process	biological process	5/609	231/93642	0.01816	0.652947578947368	TRINITY_DN68792_c0_g1,TRINITY_DN86778_c1_g4,TRINITY_DN93699_c0_g1,TRINITY_DN94851_c1_g4,TRINITY_DN95629_c0_g1	TRINITY_DN68792_c0_g1,TRINITY_DN86778_c1_g4,TRINITY_DN93699_c0_g1,TRINITY_DN94851_c1_g4,TRINITY_DN95629_c0_g1
GO:0006639	acylglycerol metabolic process	biological process	5/609	231/93642	0.01816	0.652947578947368	TRINITY_DN68792_c0_g1,TRINITY_DN86778_c1_g4,TRINITY_DN93699_c0_g1,TRINITY_DN94851_c1_g4,TRINITY_DN95629_c0_g1	TRINITY_DN68792_c0_g1,TRINITY_DN86778_c1_g4,TRINITY_DN93699_c0_g1,TRINITY_DN94851_c1_g4,TRINITY_DN95629_c0_g1
GO:0000822	inositol hexakisphosphate binding	molecular function	2/669	29/102170	0.01546	0.653149541284404	TRINITY_DN77469_c0_g4,TRINITY_DN94649_c0_g3	TRINITY_DN77469_c0_g4,TRINITY_DN94649_c0_g3
GO:0071229	cellular response to acid chemical	biological process	15/609	1248/93642	0.01825	0.654461286089239	TRINITY_DN71306_c1_g4,TRINITY_DN73324_c3_g1,TRINITY_DN75228_c3_g1,TRINITY_DN75340_c0_g3,TRINITY_DN84335_c0_g1,TRINITY_DN85282_c1_g2,TRINITY_DN86079_c0_g1,TRINITY_DN91644_c0_g1,TRINITY_DN91758_c3_g4,TRINITY_DN93940_c0_g3,TRINITY_DN95125_c2_g1,TRINITY_DN95221_c2_g3,TRINITY_DN97471_c1_g1,TRINITY_DN97970_c2_g1,TRINITY_DN99016_c7_g5	TRINITY_DN71306_c1_g4,TRINITY_DN73324_c3_g1,TRINITY_DN75228_c3_g1,TRINITY_DN75340_c0_g3,TRINITY_DN84335_c0_g1,TRINITY_DN85282_c1_g2,TRINITY_DN86079_c0_g1,TRINITY_DN91644_c0_g1,TRINITY_DN91758_c3_g4,TRINITY_DN93940_c0_g3,TRINITY_DN95125_c2_g1,TRINITY_DN95221_c2_g3,TRINITY_DN97471_c1_g1,TRINITY_DN97970_c2_g1,TRINITY_DN99016_c7_g5
GO:0004144	diacylglycerol O-acyltransferase activity	molecular function	3/669	80/102170	0.01582	0.656316216216216	TRINITY_DN93699_c0_g1,TRINITY_DN94851_c1_g4,TRINITY_DN95629_c0_g1	TRINITY_DN93699_c0_g1,TRINITY_DN94851_c1_g4,TRINITY_DN95629_c0_g1
GO:0070300	phosphatidic acid binding	molecular function	3/669	80/102170	0.01582	0.656316216216216	TRINITY_DN76839_c0_g1,TRINITY_DN88395_c3_g2,TRINITY_DN99055_c10_g1	TRINITY_DN76839_c0_g1,TRINITY_DN88395_c3_g2,TRINITY_DN99055_c10_g1
GO:0031110	regulation of microtubule polymerization or depolymerization	biological process	2/609	32/93642	0.01841	0.656751514360313	TRINITY_DN77469_c0_g1,TRINITY_DN93760_c2_g1	TRINITY_DN77469_c0_g1,TRINITY_DN93760_c2_g1
GO:1901569	fatty acid derivative catabolic process	biological process	2/609	32/93642	0.01841	0.656751514360313	TRINITY_DN87622_c1_g4,TRINITY_DN94383_c0_g1	TRINITY_DN87622_c1_g4,TRINITY_DN94383_c0_g1
GO:0048598	embryonic morphogenesis	biological process	5/609	232/93642	0.01846	0.656820260416667	TRINITY_DN68079_c0_g2,TRINITY_DN80884_c0_g1,TRINITY_DN86210_c0_g1,TRINITY_DN93943_c0_g3,TRINITY_DN98453_c1_g1	TRINITY_DN68079_c0_g2,TRINITY_DN80884_c0_g1,TRINITY_DN86210_c0_g1,TRINITY_DN93943_c0_g3,TRINITY_DN98453_c1_g1
GO:0009756	carbohydrate mediated signaling	biological process	4/609	154/93642	0.01858	0.657664611398964	TRINITY_DN73324_c3_g1,TRINITY_DN91758_c3_g4,TRINITY_DN96892_c2_g1,TRINITY_DN97471_c1_g1	TRINITY_DN73324_c3_g1,TRINITY_DN91758_c3_g4,TRINITY_DN96892_c2_g1,TRINITY_DN97471_c1_g1
GO:0010182	sugar mediated signaling pathway	biological process	4/609	154/93642	0.01858	0.657664611398964	TRINITY_DN73324_c3_g1,TRINITY_DN91758_c3_g4,TRINITY_DN96892_c2_g1,TRINITY_DN97471_c1_g1	TRINITY_DN73324_c3_g1,TRINITY_DN91758_c3_g4,TRINITY_DN96892_c2_g1,TRINITY_DN97471_c1_g1
GO:0042651	thylakoid membrane	cellular component	10/648	735/96716	0.02818	0.659620740740741	TRINITY_DN74712_c0_g1,TRINITY_DN85213_c0_g1,TRINITY_DN89209_c2_g1,TRINITY_DN89214_c0_g1,TRINITY_DN91033_c2_g2,TRINITY_DN92690_c1_g1,TRINITY_DN92852_c0_g3,TRINITY_DN94476_c1_g1,TRINITY_DN96139_c1_g1,TRINITY_DN97001_c2_g2	TRINITY_DN74712_c0_g1,TRINITY_DN85213_c0_g1,TRINITY_DN89209_c2_g1,TRINITY_DN89214_c0_g1,TRINITY_DN91033_c2_g2,TRINITY_DN92690_c1_g1,TRINITY_DN92852_c0_g3,TRINITY_DN94476_c1_g1,TRINITY_DN96139_c1_g1,TRINITY_DN97001_c2_g2
GO:0090066	regulation of anatomical structure size	biological process	10/609	707/93642	0.01869	0.659848759689922	TRINITY_DN72905_c0_g4,TRINITY_DN74096_c1_g1,TRINITY_DN74996_c0_g1,TRINITY_DN77049_c0_g3,TRINITY_DN78801_c1_g1,TRINITY_DN81058_c1_g3,TRINITY_DN86879_c0_g3,TRINITY_DN95710_c3_g2,TRINITY_DN96523_c1_g1,TRINITY_DN96976_c1_g1	TRINITY_DN72905_c0_g4,TRINITY_DN74096_c1_g1,TRINITY_DN74996_c0_g1,TRINITY_DN77049_c0_g3,TRINITY_DN78801_c1_g1,TRINITY_DN81058_c1_g3,TRINITY_DN86879_c0_g3,TRINITY_DN95710_c3_g2,TRINITY_DN96523_c1_g1,TRINITY_DN96976_c1_g1
GO:0048573	photoperiodism, flowering	biological process	5/609	233/93642	0.01877	0.660671028277635	TRINITY_DN83047_c1_g1,TRINITY_DN84523_c1_g1,TRINITY_DN87544_c1_g3,TRINITY_DN91545_c0_g4,TRINITY_DN93239_c0_g2	TRINITY_DN83047_c1_g1,TRINITY_DN84523_c1_g1,TRINITY_DN87544_c1_g3,TRINITY_DN91545_c0_g4,TRINITY_DN93239_c0_g2
GO:0010166	wax metabolic process	biological process	3/609	86/93642	0.01881	0.660671028277635	TRINITY_DN71889_c1_g1,TRINITY_DN74503_c1_g2,TRINITY_DN94851_c1_g4	TRINITY_DN71889_c1_g1,TRINITY_DN74503_c1_g2,TRINITY_DN94851_c1_g4
GO:0005548	phospholipid transporter activity	molecular function	6/669	306/102170	0.01618	0.665258035714286	TRINITY_DN71824_c1_g1,TRINITY_DN77169_c0_g2,TRINITY_DN90979_c2_g1,TRINITY_DN97602_c1_g1,TRINITY_DN97602_c1_g2,TRINITY_DN97602_c2_g5	TRINITY_DN71824_c1_g1,TRINITY_DN77169_c0_g2,TRINITY_DN90979_c2_g1,TRINITY_DN97602_c1_g1,TRINITY_DN97602_c1_g2,TRINITY_DN97602_c2_g5
GO:0009555	pollen development	biological process	9/609	608/93642	0.01929	0.672053147208122	TRINITY_DN75121_c0_g4,TRINITY_DN77469_c0_g4,TRINITY_DN78795_c1_g1,TRINITY_DN87220_c0_g6,TRINITY_DN88748_c0_g4,TRINITY_DN90685_c2_g1,TRINITY_DN93254_c0_g1,TRINITY_DN94649_c0_g3,TRINITY_DN95948_c1_g4	TRINITY_DN75121_c0_g4,TRINITY_DN77469_c0_g4,TRINITY_DN78795_c1_g1,TRINITY_DN87220_c0_g6,TRINITY_DN88748_c0_g4,TRINITY_DN90685_c2_g1,TRINITY_DN93254_c0_g1,TRINITY_DN94649_c0_g3,TRINITY_DN95948_c1_g4
GO:0006780	uroporphyrinogen III biosynthetic process	biological process	1/609	3/93642	0.01938	0.672053147208122	TRINITY_DN95345_c0_g1	TRINITY_DN95345_c0_g1
GO:0015015	heparan sulfate proteoglycan biosynthetic process, enzymatic modification	biological process	1/609	3/93642	0.01938	0.672053147208122	TRINITY_DN68749_c0_g1	TRINITY_DN68749_c0_g1
GO:0016487	farnesol metabolic process	biological process	1/609	3/93642	0.01938	0.672053147208122	TRINITY_DN85750_c2_g1	TRINITY_DN85750_c2_g1
GO:0042073	intraciliary transport	biological process	1/609	3/93642	0.01938	0.672053147208122	TRINITY_DN78689_c0_g1	TRINITY_DN78689_c0_g1
GO:0005515	protein binding	molecular function	65/669	7579/102170	0.01651	0.672819026548673	TRINITY_DN71306_c1_g4,TRINITY_DN71958_c2_g1,TRINITY_DN72819_c0_g1,TRINITY_DN72905_c0_g4,TRINITY_DN73363_c2_g1,TRINITY_DN74568_c0_g3,TRINITY_DN74712_c0_g1,TRINITY_DN74815_c2_g1,TRINITY_DN74996_c0_g1,TRINITY_DN76045_c0_g1,TRINITY_DN76839_c0_g1,TRINITY_DN77049_c0_g3,TRINITY_DN77099_c0_g1,TRINITY_DN77234_c1_g2,TRINITY_DN77433_c0_g1,TRINITY_DN77469_c0_g1,TRINITY_DN78559_c1_g4,TRINITY_DN78702_c1_g1,TRI…	TRINITY_DN71306_c1_g4,TRINITY_DN71958_c2_g1,TRINITY_DN72819_c0_g1,TRINITY_DN72905_c0_g4,TRINITY_DN73363_c2_g1,TRINITY_DN74568_c0_g3,TRINITY_DN74712_c0_g1,TRINITY_DN74815_c2_g1,TRINITY_DN74996_c0_g1,TRINITY_DN76045_c0_g1,TRINITY_DN76839_c0_g1,TRINITY_DN77049_c0_g3,TRINITY_DN77099_c0_g1,TRINITY_DN77234_c1_g2,TRINITY_DN77433_c0_g1,TRINITY_DN77469_c0_g1,TRINITY_DN78559_c1_g4,TRINITY_DN78702_c1_g1,TRI…
GO:0070920	regulation of production of small RNA involved in gene silencing by RNA	biological process	2/609	33/93642	0.01952	0.675194329113924	TRINITY_DN72819_c0_g1,TRINITY_DN95775_c0_g1	TRINITY_DN72819_c0_g1,TRINITY_DN95775_c0_g1
GO:0006900	vesicle budding from membrane	biological process	5/609	236/93642	0.01971	0.680044772727273	TRINITY_DN71824_c1_g1,TRINITY_DN77169_c0_g2,TRINITY_DN97602_c1_g1,TRINITY_DN97602_c1_g2,TRINITY_DN97602_c2_g5	TRINITY_DN71824_c1_g1,TRINITY_DN77169_c0_g2,TRINITY_DN97602_c1_g1,TRINITY_DN97602_c1_g2,TRINITY_DN97602_c2_g5
GO:0009585	red, far-red light phototransduction	biological process	4/609	157/93642	0.01979	0.681085062972292	TRINITY_DN66987_c0_g1,TRINITY_DN84523_c1_g1,TRINITY_DN87544_c1_g3,TRINITY_DN98591_c5_g2	TRINITY_DN66987_c0_g1,TRINITY_DN84523_c1_g1,TRINITY_DN87544_c1_g3,TRINITY_DN98591_c5_g2
GO:0010183	pollen tube guidance	biological process	5/609	237/93642	0.02003	0.687612788944724	TRINITY_DN70911_c2_g1,TRINITY_DN73374_c1_g2,TRINITY_DN87707_c0_g1,TRINITY_DN88748_c0_g4,TRINITY_DN97161_c2_g1	TRINITY_DN70911_c2_g1,TRINITY_DN73374_c1_g2,TRINITY_DN87707_c0_g1,TRINITY_DN88748_c0_g4,TRINITY_DN97161_c2_g1
GO:0009706	chloroplast inner membrane	cellular component	5/648	256/96716	0.02990	0.691012048192771	TRINITY_DN88914_c0_g1,TRINITY_DN91821_c1_g1,TRINITY_DN92736_c1_g3,TRINITY_DN94476_c1_g1,TRINITY_DN96139_c1_g1	TRINITY_DN88914_c0_g1,TRINITY_DN91821_c1_g1,TRINITY_DN92736_c1_g3,TRINITY_DN94476_c1_g1,TRINITY_DN96139_c1_g1
GO:0034357	photosynthetic membrane	cellular component	10/648	744/96716	0.03025	0.691012048192771	TRINITY_DN74712_c0_g1,TRINITY_DN85213_c0_g1,TRINITY_DN89209_c2_g1,TRINITY_DN89214_c0_g1,TRINITY_DN91033_c2_g2,TRINITY_DN92690_c1_g1,TRINITY_DN92852_c0_g3,TRINITY_DN94476_c1_g1,TRINITY_DN96139_c1_g1,TRINITY_DN97001_c2_g2	TRINITY_DN74712_c0_g1,TRINITY_DN85213_c0_g1,TRINITY_DN89209_c2_g1,TRINITY_DN89214_c0_g1,TRINITY_DN91033_c2_g2,TRINITY_DN92690_c1_g1,TRINITY_DN92852_c0_g3,TRINITY_DN94476_c1_g1,TRINITY_DN96139_c1_g1,TRINITY_DN97001_c2_g2
GO:0009909	regulation of flower development	biological process	6/609	325/93642	0.02041	0.698901829573935	TRINITY_DN68255_c0_g1,TRINITY_DN75121_c0_g4,TRINITY_DN82801_c0_g1,TRINITY_DN84175_c3_g2,TRINITY_DN94594_c0_g1,TRINITY_DN98362_c5_g2	TRINITY_DN68255_c0_g1,TRINITY_DN75121_c0_g4,TRINITY_DN82801_c0_g1,TRINITY_DN84175_c3_g2,TRINITY_DN94594_c0_g1,TRINITY_DN98362_c5_g2
GO:0010218	response to far red light	biological process	3/609	89/93642	0.02058	0.70296135	TRINITY_DN84523_c1_g1,TRINITY_DN87544_c1_g3,TRINITY_DN98591_c5_g2	TRINITY_DN84523_c1_g1,TRINITY_DN87544_c1_g3,TRINITY_DN98591_c5_g2
GO:0043424	protein histidine kinase binding	molecular function	3/669	83/102170	0.01744	0.703163478260869	TRINITY_DN74815_c2_g1,TRINITY_DN86210_c0_g1,TRINITY_DN93943_c0_g3	TRINITY_DN74815_c2_g1,TRINITY_DN86210_c0_g1,TRINITY_DN93943_c0_g3
GO:0010011	auxin binding	molecular function	2/669	31/102170	0.01756	0.703163478260869	TRINITY_DN77469_c0_g4,TRINITY_DN94649_c0_g3	TRINITY_DN77469_c0_g4,TRINITY_DN94649_c0_g3
GO:0009904	chloroplast accumulation movement	biological process	2/609	34/93642	0.02065	0.703593391521197	TRINITY_DN80494_c0_g1,TRINITY_DN97495_c2_g1	TRINITY_DN80494_c0_g1,TRINITY_DN97495_c2_g1
GO:0000325	plant-type vacuole	cellular component	7/648	444/96716	0.03142	0.705981176470588	TRINITY_DN69571_c1_g1,TRINITY_DN90280_c0_g1,TRINITY_DN90634_c0_g3,TRINITY_DN95637_c3_g4,TRINITY_DN97626_c2_g1,TRINITY_DN97768_c0_g2,TRINITY_DN98362_c5_g2	TRINITY_DN69571_c1_g1,TRINITY_DN90280_c0_g1,TRINITY_DN90634_c0_g3,TRINITY_DN95637_c3_g4,TRINITY_DN97626_c2_g1,TRINITY_DN97768_c0_g2,TRINITY_DN98362_c5_g2
GO:0009528	plastid inner membrane	cellular component	5/648	260/96716	0.03165	0.705981176470588	TRINITY_DN88914_c0_g1,TRINITY_DN91821_c1_g1,TRINITY_DN92736_c1_g3,TRINITY_DN94476_c1_g1,TRINITY_DN96139_c1_g1	TRINITY_DN88914_c0_g1,TRINITY_DN91821_c1_g1,TRINITY_DN92736_c1_g3,TRINITY_DN94476_c1_g1,TRINITY_DN96139_c1_g1
GO:0001650	fibrillar center	cellular component	1/648	5/96716	0.03305	0.712077272727273	TRINITY_DN95813_c1_g1	TRINITY_DN95813_c1_g1
GO:0010330	cellulose synthase complex	cellular component	1/648	5/96716	0.03305	0.712077272727273	TRINITY_DN80965_c0_g4	TRINITY_DN80965_c0_g4
GO:1990071	TRAPPII protein complex	cellular component	1/648	5/96716	0.03305	0.712077272727273	TRINITY_DN75706_c0_g2	TRINITY_DN75706_c0_g2
GO:0051052	regulation of DNA metabolic process	biological process	9/609	617/93642	0.02096	0.712379303482587	TRINITY_DN83047_c1_g1,TRINITY_DN89410_c0_g2,TRINITY_DN91545_c0_g4,TRINITY_DN93339_c1_g1,TRINITY_DN96368_c1_g3,TRINITY_DN96797_c0_g4,TRINITY_DN97461_c0_g1,TRINITY_DN97461_c0_g2,TRINITY_DN98683_c5_g1	TRINITY_DN83047_c1_g1,TRINITY_DN89410_c0_g2,TRINITY_DN91545_c0_g4,TRINITY_DN93339_c1_g1,TRINITY_DN96368_c1_g3,TRINITY_DN96797_c0_g4,TRINITY_DN97461_c0_g1,TRINITY_DN97461_c0_g2,TRINITY_DN98683_c5_g1
GO:0009815	1-aminocyclopropane-1-carboxylate oxidase activity	molecular function	2/669	32/102170	0.01865	0.713409523809524	TRINITY_DN75340_c0_g2,TRINITY_DN75340_c0_g3	TRINITY_DN75340_c0_g2,TRINITY_DN75340_c0_g3
GO:0005200	structural constituent of cytoskeleton	molecular function	5/669	232/102170	0.01896	0.713409523809524	TRINITY_DN74512_c3_g1,TRINITY_DN77433_c0_g1,TRINITY_DN81644_c0_g1,TRINITY_DN89157_c0_g1,TRINITY_DN93003_c1_g1	TRINITY_DN74512_c3_g1,TRINITY_DN77433_c0_g1,TRINITY_DN81644_c0_g1,TRINITY_DN89157_c0_g1,TRINITY_DN93003_c1_g1
GO:0019900	kinase binding	molecular function	6/669	319/102170	0.01941	0.713409523809524	TRINITY_DN74815_c2_g1,TRINITY_DN86210_c0_g1,TRINITY_DN88225_c4_g1,TRINITY_DN88225_c4_g2,TRINITY_DN91644_c0_g1,TRINITY_DN93943_c0_g3	TRINITY_DN74815_c2_g1,TRINITY_DN86210_c0_g1,TRINITY_DN88225_c4_g1,TRINITY_DN88225_c4_g2,TRINITY_DN91644_c0_g1,TRINITY_DN93943_c0_g3
GO:0080044	quercetin 7-O-glucosyltransferase activity	molecular function	4/669	155/102170	0.01941	0.713409523809524	TRINITY_DN69932_c0_g3,TRINITY_DN81990_c0_g1,TRINITY_DN87084_c1_g4,TRINITY_DN95367_c0_g1	TRINITY_DN69932_c0_g3,TRINITY_DN81990_c0_g1,TRINITY_DN87084_c1_g4,TRINITY_DN95367_c0_g1
GO:0008476	protein-tyrosine sulfotransferase activity	molecular function	1/669	3/102170	0.01952	0.713409523809524	TRINITY_DN68749_c0_g1	TRINITY_DN68749_c0_g1
GO:0008841	dihydrofolate synthase activity	molecular function	1/669	3/102170	0.01952	0.713409523809524	TRINITY_DN94037_c1_g2	TRINITY_DN94037_c1_g2
GO:0010291	carotene beta-ring hydroxylase activity	molecular function	1/669	3/102170	0.01952	0.713409523809524	TRINITY_DN70885_c1_g1	TRINITY_DN70885_c1_g1
GO:0016710	trans-cinnamate 4-monooxygenase activity	molecular function	1/669	3/102170	0.01952	0.713409523809524	TRINITY_DN95494_c1_g1	TRINITY_DN95494_c1_g1
GO:0017095	heparan sulfate 6-O-sulfotransferase activity	molecular function	1/669	3/102170	0.01952	0.713409523809524	TRINITY_DN68749_c0_g1	TRINITY_DN68749_c0_g1
GO:0034005	germacrene-A synthase activity	molecular function	1/669	3/102170	0.01952	0.713409523809524	TRINITY_DN77743_c0_g1	TRINITY_DN77743_c0_g1
GO:0034483	heparan sulfate sulfotransferase activity	molecular function	1/669	3/102170	0.01952	0.713409523809524	TRINITY_DN68749_c0_g1	TRINITY_DN68749_c0_g1
GO:0090502	RNA phosphodiester bond hydrolysis, endonucleolytic	biological process	6/609	328/93642	0.02124	0.720104516129032	TRINITY_DN70421_c0_g1,TRINITY_DN71889_c1_g1,TRINITY_DN73444_c1_g3,TRINITY_DN74503_c1_g2,TRINITY_DN80794_c0_g1,TRINITY_DN83048_c1_g1	TRINITY_DN70421_c0_g1,TRINITY_DN71889_c1_g1,TRINITY_DN73444_c1_g3,TRINITY_DN74503_c1_g2,TRINITY_DN80794_c0_g1,TRINITY_DN83048_c1_g1
GO:0005319	lipid transporter activity	molecular function	8/669	508/102170	0.01993	0.720505384615385	TRINITY_DN71824_c1_g1,TRINITY_DN77169_c0_g2,TRINITY_DN82781_c0_g1,TRINITY_DN90979_c2_g1,TRINITY_DN94542_c0_g6,TRINITY_DN97602_c1_g1,TRINITY_DN97602_c1_g2,TRINITY_DN97602_c2_g5	TRINITY_DN71824_c1_g1,TRINITY_DN77169_c0_g2,TRINITY_DN82781_c0_g1,TRINITY_DN90979_c2_g1,TRINITY_DN94542_c0_g6,TRINITY_DN97602_c1_g1,TRINITY_DN97602_c1_g2,TRINITY_DN97602_c2_g5
GO:0080043	quercetin 3-O-glucosyltransferase activity	molecular function	4/669	157/102170	0.02024	0.720505384615385	TRINITY_DN69932_c0_g3,TRINITY_DN81990_c0_g1,TRINITY_DN87084_c1_g4,TRINITY_DN95367_c0_g1	TRINITY_DN69932_c0_g3,TRINITY_DN81990_c0_g1,TRINITY_DN87084_c1_g4,TRINITY_DN95367_c0_g1
GO:0070290	N-acylphosphatidylethanolamine-specific phospholipase D activity	molecular function	3/669	88/102170	0.02034	0.720505384615385	TRINITY_DN91464_c3_g1,TRINITY_DN95123_c1_g2,TRINITY_DN98434_c2_g2	TRINITY_DN91464_c3_g1,TRINITY_DN95123_c1_g2,TRINITY_DN98434_c2_g2
GO:0003700	DNA binding transcription factor activity	molecular function	36/669	3823/102170	0.02034	0.720505384615385	TRINITY_DN68532_c1_g1,TRINITY_DN70026_c1_g2,TRINITY_DN70156_c0_g5,TRINITY_DN70487_c0_g1,TRINITY_DN70831_c1_g2,TRINITY_DN74712_c0_g1,TRINITY_DN76045_c0_g1,TRINITY_DN76917_c3_g1,TRINITY_DN79655_c1_g1,TRINITY_DN80415_c0_g1,TRINITY_DN81128_c3_g1,TRINITY_DN81259_c0_g1,TRINITY_DN82761_c1_g1,TRINITY_DN83441_c0_g1,TRINITY_DN83833_c0_g4,TRINITY_DN84175_c3_g2,TRINITY_DN84708_c1_g1,TRINITY_DN85282_c1_g2,TRI…	TRINITY_DN68532_c1_g1,TRINITY_DN70026_c1_g2,TRINITY_DN70156_c0_g5,TRINITY_DN70487_c0_g1,TRINITY_DN70831_c1_g2,TRINITY_DN74712_c0_g1,TRINITY_DN76045_c0_g1,TRINITY_DN76917_c3_g1,TRINITY_DN79655_c1_g1,TRINITY_DN80415_c0_g1,TRINITY_DN81128_c3_g1,TRINITY_DN81259_c0_g1,TRINITY_DN82761_c1_g1,TRINITY_DN83441_c0_g1,TRINITY_DN83833_c0_g4,TRINITY_DN84175_c3_g2,TRINITY_DN84708_c1_g1,TRINITY_DN85282_c1_g2,TRI…
GO:0008420	CTD phosphatase activity	molecular function	2/669	34/102170	0.02091	0.730869318181818	TRINITY_DN87600_c1_g3,TRINITY_DN97304_c1_g2	TRINITY_DN87600_c1_g3,TRINITY_DN97304_c1_g2
GO:0015254	glycerol channel activity	molecular function	3/669	89/102170	0.02095	0.730869318181818	TRINITY_DN77049_c0_g3,TRINITY_DN81058_c1_g3,TRINITY_DN86879_c0_g3	TRINITY_DN77049_c0_g3,TRINITY_DN81058_c1_g3,TRINITY_DN86879_c0_g3
GO:0043622	cortical microtubule organization	biological process	3/609	91/93642	0.02180	0.737260891089109	TRINITY_DN77469_c0_g1,TRINITY_DN80965_c0_g4,TRINITY_DN93760_c2_g1	TRINITY_DN77469_c0_g1,TRINITY_DN80965_c0_g4,TRINITY_DN93760_c2_g1
GO:0050821	protein stabilization	biological process	4/609	162/93642	0.02191	0.739151432098765	TRINITY_DN72688_c0_g2,TRINITY_DN77469_c0_g1,TRINITY_DN90554_c1_g1,TRINITY_DN93760_c2_g1	TRINITY_DN72688_c0_g2,TRINITY_DN77469_c0_g1,TRINITY_DN90554_c1_g1,TRINITY_DN93760_c2_g1
GO:1902904	negative regulation of supramolecular fiber organization	biological process	4/609	163/93642	0.02235	0.752138054187192	TRINITY_DN72905_c0_g4,TRINITY_DN77469_c0_g1,TRINITY_DN93760_c2_g1,TRINITY_DN96976_c1_g1	TRINITY_DN72905_c0_g4,TRINITY_DN77469_c0_g1,TRINITY_DN93760_c2_g1,TRINITY_DN96976_c1_g1
GO:0005881	cytoplasmic microtubule	cellular component	3/648	107/96716	0.03560	0.7584	TRINITY_DN73679_c1_g2,TRINITY_DN90376_c0_g3,TRINITY_DN92678_c1_g2	TRINITY_DN73679_c1_g2,TRINITY_DN90376_c0_g3,TRINITY_DN92678_c1_g2
GO:0010232	vascular transport	biological process	2/609	36/93642	0.02299	0.769883259803921	TRINITY_DN80884_c0_g1,TRINITY_DN90493_c3_g1	TRINITY_DN80884_c0_g1,TRINITY_DN90493_c3_g1
GO:0010233	phloem transport	biological process	2/609	36/93642	0.02299	0.769883259803921	TRINITY_DN80884_c0_g1,TRINITY_DN90493_c3_g1	TRINITY_DN80884_c0_g1,TRINITY_DN90493_c3_g1
GO:0009627	systemic acquired resistance	biological process	4/609	165/93642	0.02324	0.776352371638142	TRINITY_DN71558_c1_g1,TRINITY_DN75228_c3_g1,TRINITY_DN87533_c3_g4,TRINITY_DN93940_c0_g3	TRINITY_DN71558_c1_g1,TRINITY_DN75228_c3_g1,TRINITY_DN87533_c3_g4,TRINITY_DN93940_c0_g3
GO:0009814	defense response, incompatible interaction	biological process	9/609	629/93642	0.02335	0.778124512195122	TRINITY_DN71558_c1_g1,TRINITY_DN75228_c3_g1,TRINITY_DN84469_c1_g1,TRINITY_DN87533_c3_g4,TRINITY_DN90512_c0_g2,TRINITY_DN93940_c0_g3,TRINITY_DN95617_c1_g4,TRINITY_DN97471_c1_g1,TRINITY_DN99016_c7_g5	TRINITY_DN71558_c1_g1,TRINITY_DN75228_c3_g1,TRINITY_DN84469_c1_g1,TRINITY_DN87533_c3_g4,TRINITY_DN90512_c0_g2,TRINITY_DN93940_c0_g3,TRINITY_DN95617_c1_g4,TRINITY_DN97471_c1_g1,TRINITY_DN99016_c7_g5
GO:0005977	glycogen metabolic process	biological process	5/609	247/93642	0.02343	0.778890729927007	TRINITY_DN82502_c0_g1,TRINITY_DN82502_c0_g3,TRINITY_DN94345_c0_g1,TRINITY_DN96775_c3_g1,TRINITY_DN97884_c2_g6	TRINITY_DN82502_c0_g1,TRINITY_DN82502_c0_g3,TRINITY_DN94345_c0_g1,TRINITY_DN96775_c3_g1,TRINITY_DN97884_c2_g6
GO:0006464	cellular protein modification process	biological process	69/609	8337/93642	0.02359	0.779479064748202	TRINITY_DN66987_c0_g1,TRINITY_DN68255_c0_g1,TRINITY_DN68434_c0_g1,TRINITY_DN71060_c0_g3,TRINITY_DN71554_c0_g1,TRINITY_DN71855_c4_g2,TRINITY_DN72745_c1_g1,TRINITY_DN74691_c0_g3,TRINITY_DN75121_c0_g4,TRINITY_DN75376_c0_g1,TRINITY_DN76839_c0_g1,TRINITY_DN77469_c0_g4,TRINITY_DN78319_c0_g1,TRINITY_DN78505_c2_g1,TRINITY_DN78559_c1_g4,TRINITY_DN80004_c0_g1,TRINITY_DN80373_c0_g1,TRINITY_DN80708_c0_g1,TRI…	TRINITY_DN66987_c0_g1,TRINITY_DN68255_c0_g1,TRINITY_DN68434_c0_g1,TRINITY_DN71060_c0_g3,TRINITY_DN71554_c0_g1,TRINITY_DN71855_c4_g2,TRINITY_DN72745_c1_g1,TRINITY_DN74691_c0_g3,TRINITY_DN75121_c0_g4,TRINITY_DN75376_c0_g1,TRINITY_DN76839_c0_g1,TRINITY_DN77469_c0_g4,TRINITY_DN78319_c0_g1,TRINITY_DN78505_c2_g1,TRINITY_DN78559_c1_g4,TRINITY_DN80004_c0_g1,TRINITY_DN80373_c0_g1,TRINITY_DN80708_c0_g1,TRI…
GO:0036211	protein modification process	biological process	69/609	8337/93642	0.02359	0.779479064748202	TRINITY_DN66987_c0_g1,TRINITY_DN68255_c0_g1,TRINITY_DN68434_c0_g1,TRINITY_DN71060_c0_g3,TRINITY_DN71554_c0_g1,TRINITY_DN71855_c4_g2,TRINITY_DN72745_c1_g1,TRINITY_DN74691_c0_g3,TRINITY_DN75121_c0_g4,TRINITY_DN75376_c0_g1,TRINITY_DN76839_c0_g1,TRINITY_DN77469_c0_g4,TRINITY_DN78319_c0_g1,TRINITY_DN78505_c2_g1,TRINITY_DN78559_c1_g4,TRINITY_DN80004_c0_g1,TRINITY_DN80373_c0_g1,TRINITY_DN80708_c0_g1,TRI…	TRINITY_DN66987_c0_g1,TRINITY_DN68255_c0_g1,TRINITY_DN68434_c0_g1,TRINITY_DN71060_c0_g3,TRINITY_DN71554_c0_g1,TRINITY_DN71855_c4_g2,TRINITY_DN72745_c1_g1,TRINITY_DN74691_c0_g3,TRINITY_DN75121_c0_g4,TRINITY_DN75376_c0_g1,TRINITY_DN76839_c0_g1,TRINITY_DN77469_c0_g4,TRINITY_DN78319_c0_g1,TRINITY_DN78505_c2_g1,TRINITY_DN78559_c1_g4,TRINITY_DN80004_c0_g1,TRINITY_DN80373_c0_g1,TRINITY_DN80708_c0_g1,TRI…
GO:0019252	starch biosynthetic process	biological process	3/609	94/93642	0.02372	0.779479064748202	TRINITY_DN94345_c0_g1,TRINITY_DN94349_c0_g2,TRINITY_DN96775_c3_g1	TRINITY_DN94345_c0_g1,TRINITY_DN94349_c0_g2,TRINITY_DN96775_c3_g1
GO:2000241	regulation of reproductive process	biological process	15/609	1291/93642	0.02375	0.779479064748202	TRINITY_DN68255_c0_g1,TRINITY_DN70911_c2_g1,TRINITY_DN73374_c1_g2,TRINITY_DN75121_c0_g4,TRINITY_DN82801_c0_g1,TRINITY_DN84175_c3_g2,TRINITY_DN84523_c1_g1,TRINITY_DN85282_c1_g2,TRINITY_DN86504_c0_g1,TRINITY_DN87544_c1_g3,TRINITY_DN87707_c0_g1,TRINITY_DN93239_c0_g2,TRINITY_DN94594_c0_g1,TRINITY_DN97161_c2_g1,TRINITY_DN98362_c5_g2	TRINITY_DN68255_c0_g1,TRINITY_DN70911_c2_g1,TRINITY_DN73374_c1_g2,TRINITY_DN75121_c0_g4,TRINITY_DN82801_c0_g1,TRINITY_DN84175_c3_g2,TRINITY_DN84523_c1_g1,TRINITY_DN85282_c1_g2,TRINITY_DN86504_c0_g1,TRINITY_DN87544_c1_g3,TRINITY_DN87707_c0_g1,TRINITY_DN93239_c0_g2,TRINITY_DN94594_c0_g1,TRINITY_DN97161_c2_g1,TRINITY_DN98362_c5_g2
GO:0006112	energy reserve metabolic process	biological process	5/609	248/93642	0.02379	0.779479064748202	TRINITY_DN82502_c0_g1,TRINITY_DN82502_c0_g3,TRINITY_DN94345_c0_g1,TRINITY_DN96775_c3_g1,TRINITY_DN97884_c2_g6	TRINITY_DN82502_c0_g1,TRINITY_DN82502_c0_g3,TRINITY_DN94345_c0_g1,TRINITY_DN96775_c3_g1,TRINITY_DN97884_c2_g6
GO:0050918	positive chemotaxis	biological process	5/609	248/93642	0.02379	0.779479064748202	TRINITY_DN70911_c2_g1,TRINITY_DN73374_c1_g2,TRINITY_DN87707_c0_g1,TRINITY_DN88748_c0_g4,TRINITY_DN97161_c2_g1	TRINITY_DN70911_c2_g1,TRINITY_DN73374_c1_g2,TRINITY_DN87707_c0_g1,TRINITY_DN88748_c0_g4,TRINITY_DN97161_c2_g1
GO:0017006	protein-tetrapyrrole linkage	biological process	2/609	37/93642	0.02420	0.791015789473684	TRINITY_DN66987_c0_g1,TRINITY_DN98591_c5_g2	TRINITY_DN66987_c0_g1,TRINITY_DN98591_c5_g2
GO:0004842	ubiquitin-protein transferase activity	molecular function	20/669	1864/102170	0.02328	0.806048120300752	TRINITY_DN65824_c0_g1,TRINITY_DN73130_c0_g1,TRINITY_DN73145_c2_g1,TRINITY_DN78505_c2_g1,TRINITY_DN83047_c1_g1,TRINITY_DN83104_c0_g1,TRINITY_DN83505_c3_g2,TRINITY_DN84842_c1_g1,TRINITY_DN87416_c0_g5,TRINITY_DN88188_c0_g5,TRINITY_DN89317_c0_g1,TRINITY_DN91317_c1_g5,TRINITY_DN91545_c0_g4,TRINITY_DN92492_c0_g2,TRINITY_DN94216_c0_g2,TRINITY_DN94649_c0_g3,TRINITY_DN97472_c3_g1,TRINITY_DN97736_c4_g5,TRI…	TRINITY_DN65824_c0_g1,TRINITY_DN73130_c0_g1,TRINITY_DN73145_c2_g1,TRINITY_DN78505_c2_g1,TRINITY_DN83047_c1_g1,TRINITY_DN83104_c0_g1,TRINITY_DN83505_c3_g2,TRINITY_DN84842_c1_g1,TRINITY_DN87416_c0_g5,TRINITY_DN88188_c0_g5,TRINITY_DN89317_c0_g1,TRINITY_DN91317_c1_g5,TRINITY_DN91545_c0_g4,TRINITY_DN92492_c0_g2,TRINITY_DN94216_c0_g2,TRINITY_DN94649_c0_g3,TRINITY_DN97472_c3_g1,TRINITY_DN97736_c4_g5,TRI…
GO:0006714	sesquiterpenoid metabolic process	biological process	3/609	96/93642	0.02505	0.809100873563218	TRINITY_DN74872_c1_g1,TRINITY_DN85750_c2_g1,TRINITY_DN92852_c0_g3	TRINITY_DN74872_c1_g1,TRINITY_DN85750_c2_g1,TRINITY_DN92852_c0_g3
GO:0009228	thiamine biosynthetic process	biological process	3/609	96/93642	0.02505	0.809100873563218	TRINITY_DN83303_c2_g2,TRINITY_DN87944_c0_g3,TRINITY_DN98107_c1_g3	TRINITY_DN83303_c2_g2,TRINITY_DN87944_c0_g3,TRINITY_DN98107_c1_g3
GO:0009240	isopentenyl diphosphate biosynthetic process	biological process	3/609	96/93642	0.02505	0.809100873563218	TRINITY_DN75228_c3_g1,TRINITY_DN87125_c0_g3,TRINITY_DN93940_c0_g3	TRINITY_DN75228_c3_g1,TRINITY_DN87125_c0_g3,TRINITY_DN93940_c0_g3
GO:0042724	thiamine-containing compound biosynthetic process	biological process	3/609	96/93642	0.02505	0.809100873563218	TRINITY_DN83303_c2_g2,TRINITY_DN87944_c0_g3,TRINITY_DN98107_c1_g3	TRINITY_DN83303_c2_g2,TRINITY_DN87944_c0_g3,TRINITY_DN98107_c1_g3
GO:0046490	isopentenyl diphosphate metabolic process	biological process	3/609	96/93642	0.02505	0.809100873563218	TRINITY_DN75228_c3_g1,TRINITY_DN87125_c0_g3,TRINITY_DN93940_c0_g3	TRINITY_DN75228_c3_g1,TRINITY_DN87125_c0_g3,TRINITY_DN93940_c0_g3
GO:0009903	chloroplast avoidance movement	biological process	2/609	38/93642	0.02544	0.809100873563218	TRINITY_DN80494_c0_g1,TRINITY_DN97495_c2_g1	TRINITY_DN80494_c0_g1,TRINITY_DN97495_c2_g1
GO:0045037	protein import into chloroplast stroma	biological process	2/609	38/93642	0.02544	0.809100873563218	TRINITY_DN93209_c1_g1,TRINITY_DN96139_c1_g1	TRINITY_DN93209_c1_g1,TRINITY_DN96139_c1_g1
GO:0007100	mitotic centrosome separation	biological process	1/609	4/93642	0.02576	0.809100873563218	TRINITY_DN98607_c2_g1	TRINITY_DN98607_c2_g1
GO:0030299	intestinal cholesterol absorption	biological process	1/609	4/93642	0.02576	0.809100873563218	TRINITY_DN94542_c0_g6	TRINITY_DN94542_c0_g6
GO:0044241	lipid digestion	biological process	1/609	4/93642	0.02576	0.809100873563218	TRINITY_DN94542_c0_g6	TRINITY_DN94542_c0_g6
GO:0046322	negative regulation of fatty acid oxidation	biological process	1/609	4/93642	0.02576	0.809100873563218	TRINITY_DN92690_c1_g1	TRINITY_DN92690_c1_g1
GO:0046502	uroporphyrinogen III metabolic process	biological process	1/609	4/93642	0.02576	0.809100873563218	TRINITY_DN95345_c0_g1	TRINITY_DN95345_c0_g1
GO:0098856	intestinal lipid absorption	biological process	1/609	4/93642	0.02576	0.809100873563218	TRINITY_DN94542_c0_g6	TRINITY_DN94542_c0_g6
GO:1902171	regulation of tocopherol cyclase activity	biological process	1/609	4/93642	0.02576	0.809100873563218	TRINITY_DN72688_c0_g2	TRINITY_DN72688_c0_g2
GO:1902189	2-methylbutanoyl-CoA(4-) metabolic process	biological process	1/609	4/93642	0.02576	0.809100873563218	TRINITY_DN94383_c0_g1	TRINITY_DN94383_c0_g1
GO:1902190	2-methylbutanoyl-CoA(4-) catabolic process	biological process	1/609	4/93642	0.02576	0.809100873563218	TRINITY_DN94383_c0_g1	TRINITY_DN94383_c0_g1
GO:1902192	2-methylbut-2-enoyl-CoA(4-) metabolic process	biological process	1/609	4/93642	0.02576	0.809100873563218	TRINITY_DN94383_c0_g1	TRINITY_DN94383_c0_g1
GO:0005783	endoplasmic reticulum	cellular component	60/648	7104/96716	0.03949	0.810290526315789	TRINITY_DN67158_c0_g1,TRINITY_DN68475_c0_g1,TRINITY_DN68475_c0_g3,TRINITY_DN68792_c0_g1,TRINITY_DN70599_c1_g1,TRINITY_DN70599_c1_g3,TRINITY_DN71284_c1_g1,TRINITY_DN71889_c1_g1,TRINITY_DN71958_c2_g1,TRINITY_DN72442_c2_g3,TRINITY_DN72745_c1_g1,TRINITY_DN72866_c0_g3,TRINITY_DN73575_c3_g3,TRINITY_DN74295_c2_g1,TRINITY_DN74503_c1_g2,TRINITY_DN74996_c0_g1,TRINITY_DN75411_c0_g3,TRINITY_DN77433_c0_g1,TRI…	TRINITY_DN67158_c0_g1,TRINITY_DN68475_c0_g1,TRINITY_DN68475_c0_g3,TRINITY_DN68792_c0_g1,TRINITY_DN70599_c1_g1,TRINITY_DN70599_c1_g3,TRINITY_DN71284_c1_g1,TRINITY_DN71889_c1_g1,TRINITY_DN71958_c2_g1,TRINITY_DN72442_c2_g3,TRINITY_DN72745_c1_g1,TRINITY_DN72866_c0_g3,TRINITY_DN73575_c3_g3,TRINITY_DN74295_c2_g1,TRINITY_DN74503_c1_g2,TRINITY_DN74996_c0_g1,TRINITY_DN75411_c0_g3,TRINITY_DN77433_c0_g1,TRI…
GO:0000347	THO complex	cellular component	2/648	47/96716	0.03973	0.810290526315789	TRINITY_DN89685_c1_g2,TRINITY_DN97085_c1_g5	TRINITY_DN89685_c1_g2,TRINITY_DN97085_c1_g5
GO:0009705	plant-type vacuole membrane	cellular component	5/648	277/96716	0.03979	0.810290526315789	TRINITY_DN90634_c0_g3,TRINITY_DN95637_c3_g4,TRINITY_DN97626_c2_g1,TRINITY_DN97768_c0_g2,TRINITY_DN98362_c5_g2	TRINITY_DN90634_c0_g3,TRINITY_DN95637_c3_g4,TRINITY_DN97626_c2_g1,TRINITY_DN97768_c0_g2,TRINITY_DN98362_c5_g2
GO:0061695	transferase complex, transferring phosphorus-containing groups	cellular component	12/648	1004/96716	0.04056	0.810290526315789	TRINITY_DN71558_c1_g1,TRINITY_DN72819_c0_g1,TRINITY_DN80520_c0_g1,TRINITY_DN81461_c0_g3,TRINITY_DN84336_c1_g2,TRINITY_DN87600_c1_g3,TRINITY_DN88225_c4_g1,TRINITY_DN88225_c4_g2,TRINITY_DN89002_c0_g1,TRINITY_DN91297_c0_g1,TRINITY_DN95775_c0_g1,TRINITY_DN97304_c1_g2	TRINITY_DN71558_c1_g1,TRINITY_DN72819_c0_g1,TRINITY_DN80520_c0_g1,TRINITY_DN81461_c0_g3,TRINITY_DN84336_c1_g2,TRINITY_DN87600_c1_g3,TRINITY_DN88225_c4_g1,TRINITY_DN88225_c4_g2,TRINITY_DN89002_c0_g1,TRINITY_DN91297_c0_g1,TRINITY_DN95775_c0_g1,TRINITY_DN97304_c1_g2
GO:0031410	cytoplasmic vesicle	cellular component	37/648	4078/96716	0.04060	0.810290526315789	TRINITY_DN64594_c0_g1,TRINITY_DN70487_c0_g1,TRINITY_DN71284_c1_g1,TRINITY_DN73363_c2_g1,TRINITY_DN73679_c0_g1,TRINITY_DN75496_c1_g1,TRINITY_DN75706_c0_g2,TRINITY_DN76414_c0_g3,TRINITY_DN76476_c0_g2,TRINITY_DN79340_c0_g3,TRINITY_DN79885_c0_g2,TRINITY_DN80310_c1_g3,TRINITY_DN81232_c0_g1,TRINITY_DN81357_c0_g2,TRINITY_DN82314_c1_g2,TRINITY_DN82458_c1_g1,TRINITY_DN82781_c0_g1,TRINITY_DN83889_c0_g2,TRI…	TRINITY_DN64594_c0_g1,TRINITY_DN70487_c0_g1,TRINITY_DN71284_c1_g1,TRINITY_DN73363_c2_g1,TRINITY_DN73679_c0_g1,TRINITY_DN75496_c1_g1,TRINITY_DN75706_c0_g2,TRINITY_DN76414_c0_g3,TRINITY_DN76476_c0_g2,TRINITY_DN79340_c0_g3,TRINITY_DN79885_c0_g2,TRINITY_DN80310_c1_g3,TRINITY_DN81232_c0_g1,TRINITY_DN81357_c0_g2,TRINITY_DN82314_c1_g2,TRINITY_DN82458_c1_g1,TRINITY_DN82781_c0_g1,TRINITY_DN83889_c0_g2,TRI…
GO:0097708	intracellular vesicle	cellular component	37/648	4078/96716	0.04060	0.810290526315789	TRINITY_DN64594_c0_g1,TRINITY_DN70487_c0_g1,TRINITY_DN71284_c1_g1,TRINITY_DN73363_c2_g1,TRINITY_DN73679_c0_g1,TRINITY_DN75496_c1_g1,TRINITY_DN75706_c0_g2,TRINITY_DN76414_c0_g3,TRINITY_DN76476_c0_g2,TRINITY_DN79340_c0_g3,TRINITY_DN79885_c0_g2,TRINITY_DN80310_c1_g3,TRINITY_DN81232_c0_g1,TRINITY_DN81357_c0_g2,TRINITY_DN82314_c1_g2,TRINITY_DN82458_c1_g1,TRINITY_DN82781_c0_g1,TRINITY_DN83889_c0_g2,TRI…	TRINITY_DN64594_c0_g1,TRINITY_DN70487_c0_g1,TRINITY_DN71284_c1_g1,TRINITY_DN73363_c2_g1,TRINITY_DN73679_c0_g1,TRINITY_DN75496_c1_g1,TRINITY_DN75706_c0_g2,TRINITY_DN76414_c0_g3,TRINITY_DN76476_c0_g2,TRINITY_DN79340_c0_g3,TRINITY_DN79885_c0_g2,TRINITY_DN80310_c1_g3,TRINITY_DN81232_c0_g1,TRINITY_DN81357_c0_g2,TRINITY_DN82314_c1_g2,TRINITY_DN82458_c1_g1,TRINITY_DN82781_c0_g1,TRINITY_DN83889_c0_g2,TRI…
GO:0000418	DNA-directed RNA polymerase IV complex	cellular component	2/648	48/96716	0.04128	0.81528	TRINITY_DN81461_c0_g3,TRINITY_DN91297_c0_g1	TRINITY_DN81461_c0_g3,TRINITY_DN91297_c0_g1
GO:0016570	histone modification	biological process	12/609	968/93642	0.02648	0.829807889908257	TRINITY_DN68255_c0_g1,TRINITY_DN71855_c4_g2,TRINITY_DN75121_c0_g4,TRINITY_DN83047_c1_g1,TRINITY_DN91545_c0_g4,TRINITY_DN93239_c0_g2,TRINITY_DN96029_c2_g1,TRINITY_DN96368_c1_g3,TRINITY_DN96797_c0_g4,TRINITY_DN97461_c0_g1,TRINITY_DN97461_c0_g2,TRINITY_DN98212_c0_g1	TRINITY_DN68255_c0_g1,TRINITY_DN71855_c4_g2,TRINITY_DN75121_c0_g4,TRINITY_DN83047_c1_g1,TRINITY_DN91545_c0_g4,TRINITY_DN93239_c0_g2,TRINITY_DN96029_c2_g1,TRINITY_DN96368_c1_g3,TRINITY_DN96797_c0_g4,TRINITY_DN97461_c0_g1,TRINITY_DN97461_c0_g2,TRINITY_DN98212_c0_g1
GO:0048589	developmental growth	biological process	17/609	1545/93642	0.02658	0.831035560640732	TRINITY_DN70911_c2_g1,TRINITY_DN73374_c1_g2,TRINITY_DN73679_c0_g1,TRINITY_DN74568_c0_g3,TRINITY_DN81232_c0_g1,TRINITY_DN81308_c1_g1,TRINITY_DN86504_c0_g1,TRINITY_DN87707_c0_g1,TRINITY_DN88748_c0_g4,TRINITY_DN89072_c1_g3,TRINITY_DN89685_c1_g2,TRINITY_DN92410_c0_g3,TRINITY_DN94365_c2_g2,TRINITY_DN96030_c0_g1,TRINITY_DN97161_c2_g1,TRINITY_DN97936_c1_g1,TRINITY_DN98259_c2_g3	TRINITY_DN70911_c2_g1,TRINITY_DN73374_c1_g2,TRINITY_DN73679_c0_g1,TRINITY_DN74568_c0_g3,TRINITY_DN81232_c0_g1,TRINITY_DN81308_c1_g1,TRINITY_DN86504_c0_g1,TRINITY_DN87707_c0_g1,TRINITY_DN88748_c0_g4,TRINITY_DN89072_c1_g3,TRINITY_DN89685_c1_g2,TRINITY_DN92410_c0_g3,TRINITY_DN94365_c2_g2,TRINITY_DN96030_c0_g1,TRINITY_DN97161_c2_g1,TRINITY_DN97936_c1_g1,TRINITY_DN98259_c2_g3
GO:0006346	methylation-dependent chromatin silencing	biological process	2/609	39/93642	0.02670	0.832881506849315	TRINITY_DN83047_c1_g1,TRINITY_DN91545_c0_g4	TRINITY_DN83047_c1_g1,TRINITY_DN91545_c0_g4
GO:0016459	myosin complex	cellular component	5/648	284/96716	0.04349	0.850072577319588	TRINITY_DN71284_c1_g1,TRINITY_DN73679_c0_g1,TRINITY_DN83889_c0_g2,TRINITY_DN86288_c0_g1,TRINITY_DN96474_c1_g1	TRINITY_DN71284_c1_g1,TRINITY_DN73679_c0_g1,TRINITY_DN83889_c0_g2,TRINITY_DN86288_c0_g1,TRINITY_DN96474_c1_g1
GO:0003853	2-methylacyl-CoA dehydrogenase activity	molecular function	1/669	4/102170	0.02594	0.853240714285714	TRINITY_DN94383_c0_g1	TRINITY_DN94383_c0_g1
GO:0004095	carnitine O-palmitoyltransferase activity	molecular function	1/669	4/102170	0.02594	0.853240714285714	TRINITY_DN97161_c2_g1	TRINITY_DN97161_c2_g1
GO:0016416	O-palmitoyltransferase activity	molecular function	1/669	4/102170	0.02594	0.853240714285714	TRINITY_DN97161_c2_g1	TRINITY_DN97161_c2_g1
GO:0046422	violaxanthin de-epoxidase activity	molecular function	1/669	4/102170	0.02594	0.853240714285714	TRINITY_DN89214_c0_g1	TRINITY_DN89214_c0_g1
GO:0047461	(+)-delta-cadinene synthase activity	molecular function	1/669	4/102170	0.02594	0.853240714285714	TRINITY_DN73654_c0_g1	TRINITY_DN73654_c0_g1
GO:0050408	[pyruvate kinase]-phosphatase activity	molecular function	1/669	4/102170	0.02594	0.853240714285714	TRINITY_DN71143_c0_g1	TRINITY_DN71143_c0_g1
GO:0050699	WW domain binding	molecular function	1/669	4/102170	0.02594	0.853240714285714	TRINITY_DN91317_c1_g5	TRINITY_DN91317_c1_g5
GO:0043178	alcohol binding	molecular function	3/669	97/102170	0.02618	0.855027659574468	TRINITY_DN77469_c0_g4,TRINITY_DN82781_c0_g1,TRINITY_DN94649_c0_g3	TRINITY_DN77469_c0_g4,TRINITY_DN82781_c0_g1,TRINITY_DN94649_c0_g3
GO:0097305	response to alcohol	biological process	17/609	1552/93642	0.02757	0.85735325	TRINITY_DN71958_c2_g1,TRINITY_DN72303_c0_g1,TRINITY_DN77049_c0_g3,TRINITY_DN78319_c0_g1,TRINITY_DN85282_c1_g2,TRINITY_DN85750_c2_g1,TRINITY_DN85946_c2_g2,TRINITY_DN86079_c0_g1,TRINITY_DN87533_c3_g4,TRINITY_DN89102_c1_g1,TRINITY_DN91464_c3_g1,TRINITY_DN91644_c0_g1,TRINITY_DN91758_c3_g4,TRINITY_DN92690_c1_g1,TRINITY_DN95125_c2_g1,TRINITY_DN96354_c1_g1,TRINITY_DN97471_c1_g1	TRINITY_DN71958_c2_g1,TRINITY_DN72303_c0_g1,TRINITY_DN77049_c0_g3,TRINITY_DN78319_c0_g1,TRINITY_DN85282_c1_g2,TRINITY_DN85750_c2_g1,TRINITY_DN85946_c2_g2,TRINITY_DN86079_c0_g1,TRINITY_DN87533_c3_g4,TRINITY_DN89102_c1_g1,TRINITY_DN91464_c3_g1,TRINITY_DN91644_c0_g1,TRINITY_DN91758_c3_g4,TRINITY_DN92690_c1_g1,TRINITY_DN95125_c2_g1,TRINITY_DN96354_c1_g1,TRINITY_DN97471_c1_g1
GO:0071840	cellular component organization or biogenesis	biological process	150/609	19980/93642	0.02761	0.85735325	TRINITY_DN64594_c0_g1,TRINITY_DN68255_c0_g1,TRINITY_DN68532_c1_g1,TRINITY_DN69726_c2_g1,TRINITY_DN70584_c0_g4,TRINITY_DN70725_c1_g7,TRINITY_DN70911_c2_g1,TRINITY_DN71554_c0_g1,TRINITY_DN71824_c1_g1,TRINITY_DN71855_c4_g2,TRINITY_DN72819_c0_g1,TRINITY_DN72905_c0_g4,TRINITY_DN73145_c2_g1,TRINITY_DN73173_c0_g2,TRINITY_DN73374_c1_g2,TRINITY_DN73613_c1_g2,TRINITY_DN73679_c0_g1,TRINITY_DN73679_c1_g2,TRI…	TRINITY_DN64594_c0_g1,TRINITY_DN68255_c0_g1,TRINITY_DN68532_c1_g1,TRINITY_DN69726_c2_g1,TRINITY_DN70584_c0_g4,TRINITY_DN70725_c1_g7,TRINITY_DN70911_c2_g1,TRINITY_DN71554_c0_g1,TRINITY_DN71824_c1_g1,TRINITY_DN71855_c4_g2,TRINITY_DN72819_c0_g1,TRINITY_DN72905_c0_g4,TRINITY_DN73145_c2_g1,TRINITY_DN73173_c0_g2,TRINITY_DN73374_c1_g2,TRINITY_DN73613_c1_g2,TRINITY_DN73679_c0_g1,TRINITY_DN73679_c1_g2,TRI…
GO:0016765	transferase activity, transferring alkyl or aryl (other than methyl) groups	molecular function	11/669	852/102170	0.02658	0.859492657342657	TRINITY_DN69399_c0_g2,TRINITY_DN70805_c2_g2,TRINITY_DN70805_c2_g3,TRINITY_DN71291_c1_g1,TRINITY_DN74847_c0_g1,TRINITY_DN89209_c2_g1,TRINITY_DN89634_c0_g3,TRINITY_DN90493_c3_g1,TRINITY_DN94799_c1_g1,TRINITY_DN96159_c1_g1,TRINITY_DN97445_c4_g1	TRINITY_DN69399_c0_g2,TRINITY_DN70805_c2_g2,TRINITY_DN70805_c2_g3,TRINITY_DN71291_c1_g1,TRINITY_DN74847_c0_g1,TRINITY_DN89209_c2_g1,TRINITY_DN89634_c0_g3,TRINITY_DN90493_c3_g1,TRINITY_DN94799_c1_g1,TRINITY_DN96159_c1_g1,TRINITY_DN97445_c4_g1
GO:0016887	ATPase activity	molecular function	45/669	5084/102170	0.02669	0.859492657342657	TRINITY_DN68079_c0_g2,TRINITY_DN69571_c1_g1,TRINITY_DN70725_c1_g7,TRINITY_DN71042_c0_g1,TRINITY_DN71824_c1_g1,TRINITY_DN73893_c0_g3,TRINITY_DN74096_c1_g1,TRINITY_DN75619_c0_g1,TRINITY_DN77169_c0_g2,TRINITY_DN80494_c0_g1,TRINITY_DN82769_c1_g2,TRINITY_DN84007_c2_g2,TRINITY_DN84678_c0_g1,TRINITY_DN85119_c3_g1,TRINITY_DN86240_c0_g1,TRINITY_DN89410_c0_g2,TRINITY_DN90122_c0_g1,TRINITY_DN90634_c0_g3,TRI…	TRINITY_DN68079_c0_g2,TRINITY_DN69571_c1_g1,TRINITY_DN70725_c1_g7,TRINITY_DN71042_c0_g1,TRINITY_DN71824_c1_g1,TRINITY_DN73893_c0_g3,TRINITY_DN74096_c1_g1,TRINITY_DN75619_c0_g1,TRINITY_DN77169_c0_g2,TRINITY_DN80494_c0_g1,TRINITY_DN82769_c1_g2,TRINITY_DN84007_c2_g2,TRINITY_DN84678_c0_g1,TRINITY_DN85119_c3_g1,TRINITY_DN86240_c0_g1,TRINITY_DN89410_c0_g2,TRINITY_DN90122_c0_g1,TRINITY_DN90634_c0_g3,TRI…
GO:0061980	regulatory RNA binding	molecular function	2/669	39/102170	0.02704	0.864716666666667	TRINITY_DN71424_c1_g2,TRINITY_DN93594_c0_g1	TRINITY_DN71424_c1_g2,TRINITY_DN93594_c0_g1
GO:1901568	fatty acid derivative metabolic process	biological process	5/609	259/93642	0.02797	0.864911176470588	TRINITY_DN71889_c1_g1,TRINITY_DN74503_c1_g2,TRINITY_DN87622_c1_g4,TRINITY_DN94383_c0_g1,TRINITY_DN94851_c1_g4	TRINITY_DN71889_c1_g1,TRINITY_DN74503_c1_g2,TRINITY_DN87622_c1_g4,TRINITY_DN94383_c0_g1,TRINITY_DN94851_c1_g4
GO:0007444	imaginal disc development	biological process	2/609	40/93642	0.02798	0.864911176470588	TRINITY_DN98212_c0_g1,TRINITY_DN98607_c2_g1	TRINITY_DN98212_c0_g1,TRINITY_DN98607_c2_g1
GO:0090501	RNA phosphodiester bond hydrolysis	biological process	8/609	547/93642	0.02815	0.868201918735892	TRINITY_DN70421_c0_g1,TRINITY_DN71889_c1_g1,TRINITY_DN73444_c1_g3,TRINITY_DN74503_c1_g2,TRINITY_DN80794_c0_g1,TRINITY_DN83048_c1_g1,TRINITY_DN84353_c0_g2,TRINITY_DN85095_c1_g3	TRINITY_DN70421_c0_g1,TRINITY_DN71889_c1_g1,TRINITY_DN73444_c1_g3,TRINITY_DN74503_c1_g2,TRINITY_DN80794_c0_g1,TRINITY_DN83048_c1_g1,TRINITY_DN84353_c0_g2,TRINITY_DN85095_c1_g3
GO:0048471	perinuclear region of cytoplasm	cellular component	8/648	585/96716	0.04539	0.878157551020408	TRINITY_DN73444_c1_g3,TRINITY_DN76839_c0_g1,TRINITY_DN82781_c0_g1,TRINITY_DN83048_c1_g1,TRINITY_DN88395_c3_g2,TRINITY_DN91317_c1_g5,TRINITY_DN93850_c1_g5,TRINITY_DN99055_c10_g1	TRINITY_DN73444_c1_g3,TRINITY_DN76839_c0_g1,TRINITY_DN82781_c0_g1,TRINITY_DN83048_c1_g1,TRINITY_DN88395_c3_g2,TRINITY_DN91317_c1_g5,TRINITY_DN93850_c1_g5,TRINITY_DN99055_c10_g1
GO:0005703	polytene chromosome puff	cellular component	1/648	7/96716	0.04597	0.880395151515151	TRINITY_DN98212_c0_g1	TRINITY_DN98212_c0_g1
GO:0009640	photomorphogenesis	biological process	4/609	177/93642	0.02906	0.894249504504504	TRINITY_DN74096_c1_g1,TRINITY_DN93209_c1_g1,TRINITY_DN95710_c3_g2,TRINITY_DN98591_c5_g2	TRINITY_DN74096_c1_g1,TRINITY_DN93209_c1_g1,TRINITY_DN95710_c3_g2,TRINITY_DN98591_c5_g2
GO:0006772	thiamine metabolic process	biological process	3/609	102/93642	0.02926	0.895583668903803	TRINITY_DN83303_c2_g2,TRINITY_DN87944_c0_g3,TRINITY_DN98107_c1_g3	TRINITY_DN83303_c2_g2,TRINITY_DN87944_c0_g3,TRINITY_DN98107_c1_g3
GO:0009567	double fertilization forming a zygote and endosperm	biological process	2/609	41/93642	0.02930	0.895583668903803	TRINITY_DN94207_c2_g2,TRINITY_DN96790_c1_g1	TRINITY_DN94207_c2_g2,TRINITY_DN96790_c1_g1
GO:0010082	regulation of root meristem growth	biological process	2/609	41/93642	0.02930	0.895583668903803	TRINITY_DN81232_c0_g1,TRINITY_DN89685_c1_g2	TRINITY_DN81232_c0_g1,TRINITY_DN89685_c1_g2
GO:0042723	thiamine-containing compound metabolic process	biological process	3/609	103/93642	0.03000	0.914933035714286	TRINITY_DN83303_c2_g2,TRINITY_DN87944_c0_g3,TRINITY_DN98107_c1_g3	TRINITY_DN83303_c2_g2,TRINITY_DN87944_c0_g3,TRINITY_DN98107_c1_g3
GO:0051494	negative regulation of cytoskeleton organization	biological process	4/609	179/93642	0.03011	0.916242605790646	TRINITY_DN72905_c0_g4,TRINITY_DN77469_c0_g1,TRINITY_DN93760_c2_g1,TRINITY_DN96976_c1_g1	TRINITY_DN72905_c0_g4,TRINITY_DN77469_c0_g1,TRINITY_DN93760_c2_g1,TRINITY_DN96976_c1_g1
GO:0042133	neurotransmitter metabolic process	biological process	8/609	555/93642	0.03029	0.91945022172949	TRINITY_DN76611_c0_g2,TRINITY_DN79475_c1_g2,TRINITY_DN81308_c1_g1,TRINITY_DN81660_c3_g2,TRINITY_DN88748_c0_g4,TRINITY_DN96037_c1_g1,TRINITY_DN96704_c2_g2,TRINITY_DN97471_c0_g2	TRINITY_DN76611_c0_g2,TRINITY_DN79475_c1_g2,TRINITY_DN81308_c1_g1,TRINITY_DN81660_c3_g2,TRINITY_DN88748_c0_g4,TRINITY_DN96037_c1_g1,TRINITY_DN96704_c2_g2,TRINITY_DN97471_c0_g2
GO:0010228	vegetative to reproductive phase transition of meristem	biological process	7/609	454/93642	0.03035	0.91945022172949	TRINITY_DN68255_c0_g1,TRINITY_DN71554_c0_g1,TRINITY_DN83047_c1_g1,TRINITY_DN84523_c1_g1,TRINITY_DN87544_c1_g3,TRINITY_DN91545_c0_g4,TRINITY_DN93239_c0_g2	TRINITY_DN68255_c0_g1,TRINITY_DN71554_c0_g1,TRINITY_DN83047_c1_g1,TRINITY_DN84523_c1_g1,TRINITY_DN87544_c1_g3,TRINITY_DN91545_c0_g4,TRINITY_DN93239_c0_g2
GO:0070940	dephosphorylation of RNA polymerase II C-terminal domain	biological process	2/609	42/93642	0.03063	0.925042406181015	TRINITY_DN87600_c1_g3,TRINITY_DN97304_c1_g2	TRINITY_DN87600_c1_g3,TRINITY_DN97304_c1_g2
GO:0016569	covalent chromatin modification	biological process	12/609	990/93642	0.03067	0.925042406181015	TRINITY_DN68255_c0_g1,TRINITY_DN71855_c4_g2,TRINITY_DN75121_c0_g4,TRINITY_DN83047_c1_g1,TRINITY_DN91545_c0_g4,TRINITY_DN93239_c0_g2,TRINITY_DN96029_c2_g1,TRINITY_DN96368_c1_g3,TRINITY_DN96797_c0_g4,TRINITY_DN97461_c0_g1,TRINITY_DN97461_c0_g2,TRINITY_DN98212_c0_g1	TRINITY_DN68255_c0_g1,TRINITY_DN71855_c4_g2,TRINITY_DN75121_c0_g4,TRINITY_DN83047_c1_g1,TRINITY_DN91545_c0_g4,TRINITY_DN93239_c0_g2,TRINITY_DN96029_c2_g1,TRINITY_DN96368_c1_g3,TRINITY_DN96797_c0_g4,TRINITY_DN97461_c0_g1,TRINITY_DN97461_c0_g2,TRINITY_DN98212_c0_g1
GO:0043621	protein self-association	molecular function	4/669	176/102170	0.02917	0.926398965517241	TRINITY_DN74712_c0_g1,TRINITY_DN80794_c0_g1,TRINITY_DN91033_c2_g2,TRINITY_DN97232_c2_g1	TRINITY_DN74712_c0_g1,TRINITY_DN80794_c0_g1,TRINITY_DN91033_c2_g2,TRINITY_DN97232_c2_g1
GO:0043476	pigment accumulation	biological process	2/609	43/93642	0.03199	0.94465688172043	TRINITY_DN74096_c1_g1,TRINITY_DN95710_c3_g2	TRINITY_DN74096_c1_g1,TRINITY_DN95710_c3_g2
GO:1902182	shoot apical meristem development	biological process	2/609	43/93642	0.03199	0.94465688172043	TRINITY_DN71424_c1_g2,TRINITY_DN93594_c0_g1	TRINITY_DN71424_c1_g2,TRINITY_DN93594_c0_g1
GO:1902183	regulation of shoot apical meristem development	biological process	2/609	43/93642	0.03199	0.94465688172043	TRINITY_DN71424_c1_g2,TRINITY_DN93594_c0_g1	TRINITY_DN71424_c1_g2,TRINITY_DN93594_c0_g1
GO:0006543	glutamine catabolic process	biological process	1/609	5/93642	0.03210	0.94465688172043	TRINITY_DN88249_c2_g1	TRINITY_DN88249_c2_g1
GO:0010021	amylopectin biosynthetic process	biological process	1/609	5/93642	0.03210	0.94465688172043	TRINITY_DN94349_c0_g2	TRINITY_DN94349_c0_g2
GO:0010203	response to very low fluence red light stimulus	biological process	1/609	5/93642	0.03210	0.94465688172043	TRINITY_DN98591_c5_g2	TRINITY_DN98591_c5_g2
GO:0030513	positive regulation of BMP signaling pathway	biological process	1/609	5/93642	0.03210	0.94465688172043	TRINITY_DN88188_c0_g5	TRINITY_DN88188_c0_g5
GO:0035136	forelimb morphogenesis	biological process	1/609	5/93642	0.03210	0.94465688172043	TRINITY_DN88188_c0_g5	TRINITY_DN88188_c0_g5
GO:0043496	regulation of protein homodimerization activity	biological process	1/609	5/93642	0.03210	0.94465688172043	TRINITY_DN91317_c1_g5	TRINITY_DN91317_c1_g5
GO:0051299	centrosome separation	biological process	1/609	5/93642	0.03210	0.94465688172043	TRINITY_DN98607_c2_g1	TRINITY_DN98607_c2_g1
GO:2000896	amylopectin metabolic process	biological process	1/609	5/93642	0.03210	0.94465688172043	TRINITY_DN94349_c0_g2	TRINITY_DN94349_c0_g2
GO:0006952	defense response	biological process	51/609	6001/93642	0.03215	0.94465688172043	TRINITY_DN71424_c1_g2,TRINITY_DN71558_c1_g1,TRINITY_DN71889_c1_g1,TRINITY_DN73324_c3_g1,TRINITY_DN73444_c1_g3,TRINITY_DN74503_c1_g2,TRINITY_DN75121_c0_g4,TRINITY_DN75228_c3_g1,TRINITY_DN75340_c0_g3,TRINITY_DN77469_c0_g4,TRINITY_DN78453_c0_g1,TRINITY_DN78559_c1_g4,TRINITY_DN79655_c1_g1,TRINITY_DN80750_c0_g3,TRINITY_DN81259_c0_g1,TRINITY_DN82769_c1_g2,TRINITY_DN82801_c0_g1,TRINITY_DN82961_c0_g2,TRI…	TRINITY_DN71424_c1_g2,TRINITY_DN71558_c1_g1,TRINITY_DN71889_c1_g1,TRINITY_DN73324_c3_g1,TRINITY_DN73444_c1_g3,TRINITY_DN74503_c1_g2,TRINITY_DN75121_c0_g4,TRINITY_DN75228_c3_g1,TRINITY_DN75340_c0_g3,TRINITY_DN77469_c0_g4,TRINITY_DN78453_c0_g1,TRINITY_DN78559_c1_g4,TRINITY_DN79655_c1_g1,TRINITY_DN80750_c0_g3,TRINITY_DN81259_c0_g1,TRINITY_DN82769_c1_g2,TRINITY_DN82801_c0_g1,TRINITY_DN82961_c0_g2,TRI…
GO:1990234	transferase complex	cellular component	30/648	3245/96716	0.04994	0.9468624	TRINITY_DN68434_c0_g1,TRINITY_DN71558_c1_g1,TRINITY_DN72745_c1_g1,TRINITY_DN72819_c0_g1,TRINITY_DN75376_c0_g1,TRINITY_DN77296_c1_g1,TRINITY_DN77469_c0_g4,TRINITY_DN80520_c0_g1,TRINITY_DN80965_c0_g4,TRINITY_DN81461_c0_g3,TRINITY_DN84336_c1_g2,TRINITY_DN85202_c1_g4,TRINITY_DN86425_c1_g1,TRINITY_DN87600_c1_g3,TRINITY_DN88225_c4_g1,TRINITY_DN88225_c4_g2,TRINITY_DN89002_c0_g1,TRINITY_DN90554_c1_g1,TRI…	TRINITY_DN68434_c0_g1,TRINITY_DN71558_c1_g1,TRINITY_DN72745_c1_g1,TRINITY_DN72819_c0_g1,TRINITY_DN75376_c0_g1,TRINITY_DN77296_c1_g1,TRINITY_DN77469_c0_g4,TRINITY_DN80520_c0_g1,TRINITY_DN80965_c0_g4,TRINITY_DN81461_c0_g3,TRINITY_DN84336_c1_g2,TRINITY_DN85202_c1_g4,TRINITY_DN86425_c1_g1,TRINITY_DN87600_c1_g3,TRINITY_DN88225_c4_g1,TRINITY_DN88225_c4_g2,TRINITY_DN89002_c0_g1,TRINITY_DN90554_c1_g1,TRI…
GO:0080167	response to karrikin	biological process	4/609	184/93642	0.03282	0.962273948497854	TRINITY_DN84523_c1_g1,TRINITY_DN85961_c0_g2,TRINITY_DN87544_c1_g3,TRINITY_DN96835_c0_g1	TRINITY_DN84523_c1_g1,TRINITY_DN85961_c0_g2,TRINITY_DN87544_c1_g3,TRINITY_DN96835_c0_g1
GO:0042744	hydrogen peroxide catabolic process	biological process	6/609	364/93642	0.03294	0.963724239828694	TRINITY_DN74684_c0_g2,TRINITY_DN80065_c0_g3,TRINITY_DN80835_c0_g1,TRINITY_DN86350_c0_g1,TRINITY_DN86350_c0_g2,TRINITY_DN90918_c0_g2	TRINITY_DN74684_c0_g2,TRINITY_DN80065_c0_g3,TRINITY_DN80835_c0_g1,TRINITY_DN86350_c0_g1,TRINITY_DN86350_c0_g2,TRINITY_DN90918_c0_g2
GO:0009664	plant-type cell wall organization	biological process	5/609	271/93642	0.03303	0.9642925	TRINITY_DN80065_c0_g3,TRINITY_DN86350_c0_g1,TRINITY_DN86350_c0_g2,TRINITY_DN90918_c0_g2,TRINITY_DN92233_c0_g2	TRINITY_DN80065_c0_g3,TRINITY_DN86350_c0_g1,TRINITY_DN86350_c0_g2,TRINITY_DN90918_c0_g2,TRINITY_DN92233_c0_g2
GO:0051014	actin filament severing	biological process	2/609	44/93642	0.03337	0.972141385927505	TRINITY_DN72905_c0_g4,TRINITY_DN96976_c1_g1	TRINITY_DN72905_c0_g4,TRINITY_DN96976_c1_g1
GO:0051273	beta-glucan metabolic process	biological process	14/609	1235/93642	0.03366	0.978503361702128	TRINITY_DN64594_c0_g1,TRINITY_DN73173_c0_g2,TRINITY_DN73944_c3_g3,TRINITY_DN77296_c1_g1,TRINITY_DN80965_c0_g4,TRINITY_DN82458_c1_g1,TRINITY_DN86425_c1_g1,TRINITY_DN89487_c0_g3,TRINITY_DN97121_c1_g1,TRINITY_DN97667_c3_g2,TRINITY_DN98381_c1_g2,TRINITY_DN98392_c2_g1,TRINITY_DN98589_c2_g1,TRINITY_DN99026_c3_g1	TRINITY_DN64594_c0_g1,TRINITY_DN73173_c0_g2,TRINITY_DN73944_c3_g3,TRINITY_DN77296_c1_g1,TRINITY_DN80965_c0_g4,TRINITY_DN82458_c1_g1,TRINITY_DN86425_c1_g1,TRINITY_DN89487_c0_g3,TRINITY_DN97121_c1_g1,TRINITY_DN97667_c3_g2,TRINITY_DN98381_c1_g2,TRINITY_DN98392_c2_g1,TRINITY_DN98589_c2_g1,TRINITY_DN99026_c3_g1
GO:0044877	protein-containing complex binding	molecular function	13/669	1098/102170	0.03110	0.980928082191781	TRINITY_DN72905_c0_g4,TRINITY_DN76839_c0_g1,TRINITY_DN78702_c1_g1,TRINITY_DN82961_c0_g2,TRINITY_DN88395_c3_g2,TRINITY_DN90554_c1_g1,TRINITY_DN91686_c0_g1,TRINITY_DN92410_c0_g3,TRINITY_DN93948_c1_g2,TRINITY_DN94197_c1_g2,TRINITY_DN96976_c1_g1,TRINITY_DN97232_c2_g1,TRINITY_DN99055_c10_g1	TRINITY_DN72905_c0_g4,TRINITY_DN76839_c0_g1,TRINITY_DN78702_c1_g1,TRINITY_DN82961_c0_g2,TRINITY_DN88395_c3_g2,TRINITY_DN90554_c1_g1,TRINITY_DN91686_c0_g1,TRINITY_DN92410_c0_g3,TRINITY_DN93948_c1_g2,TRINITY_DN94197_c1_g2,TRINITY_DN96976_c1_g1,TRINITY_DN97232_c2_g1,TRINITY_DN99055_c10_g1
GO:0048469	cell maturation	biological process	5/609	273/93642	0.03392	0.983968067940552	TRINITY_DN73679_c0_g1,TRINITY_DN92972_c1_g1,TRINITY_DN96030_c0_g1,TRINITY_DN97471_c1_g1,TRINITY_DN97936_c1_g1	TRINITY_DN73679_c0_g1,TRINITY_DN92972_c1_g1,TRINITY_DN96030_c0_g1,TRINITY_DN97471_c1_g1,TRINITY_DN97936_c1_g1
GO:0004852	uroporphyrinogen-III synthase activity	molecular function	1/669	5/102170	0.03231	0.985348013245033	TRINITY_DN95345_c0_g1	TRINITY_DN95345_c0_g1
GO:0031516	far-red light photoreceptor activity	molecular function	1/669	5/102170	0.03231	0.985348013245033	TRINITY_DN98591_c5_g2	TRINITY_DN98591_c5_g2
GO:0038198	auxin receptor activity	molecular function	1/669	5/102170	0.03231	0.985348013245033	TRINITY_DN94649_c0_g3	TRINITY_DN94649_c0_g3
GO:0045430	chalcone isomerase activity	molecular function	1/669	5/102170	0.03231	0.985348013245033	TRINITY_DN96835_c0_g1	TRINITY_DN96835_c0_g1
GO:0047405	pyrimidine-5'-nucleotide nucleosidase activity	molecular function	1/669	5/102170	0.03231	0.985348013245033	TRINITY_DN98262_c0_g1	TRINITY_DN98262_c0_g1
GO:0042562	hormone binding	molecular function	3/669	106/102170	0.03283	0.989924509803922	TRINITY_DN77469_c0_g4,TRINITY_DN85980_c1_g1,TRINITY_DN94649_c0_g3	TRINITY_DN77469_c0_g4,TRINITY_DN85980_c1_g1,TRINITY_DN94649_c0_g3
GO:0004721	phosphoprotein phosphatase activity	molecular function	11/669	882/102170	0.03289	0.989924509803922	TRINITY_DN70929_c2_g1,TRINITY_DN71143_c0_g1,TRINITY_DN74494_c0_g1,TRINITY_DN86210_c0_g1,TRINITY_DN87255_c2_g1,TRINITY_DN87405_c1_g1,TRINITY_DN87600_c1_g3,TRINITY_DN91644_c0_g1,TRINITY_DN93943_c0_g3,TRINITY_DN97304_c1_g2,TRINITY_DN98602_c0_g1	TRINITY_DN70929_c2_g1,TRINITY_DN71143_c0_g1,TRINITY_DN74494_c0_g1,TRINITY_DN86210_c0_g1,TRINITY_DN87255_c2_g1,TRINITY_DN87405_c1_g1,TRINITY_DN87600_c1_g3,TRINITY_DN91644_c0_g1,TRINITY_DN93943_c0_g3,TRINITY_DN97304_c1_g2,TRINITY_DN98602_c0_g1
GO:0044262	cellular carbohydrate metabolic process	biological process	32/609	3491/93642	0.03455	1	TRINITY_DN64594_c0_g1,TRINITY_DN68792_c0_g1,TRINITY_DN73173_c0_g2,TRINITY_DN73194_c1_g1,TRINITY_DN73944_c3_g3,TRINITY_DN77296_c1_g1,TRINITY_DN80965_c0_g4,TRINITY_DN82458_c1_g1,TRINITY_DN82502_c0_g1,TRINITY_DN82502_c0_g3,TRINITY_DN82642_c3_g2,TRINITY_DN85146_c1_g1,TRINITY_DN86425_c1_g1,TRINITY_DN86778_c1_g4,TRINITY_DN87713_c1_g2,TRINITY_DN88387_c0_g1,TRINITY_DN89487_c0_g3,TRINITY_DN91323_c1_g5,TRI…	TRINITY_DN64594_c0_g1,TRINITY_DN68792_c0_g1,TRINITY_DN73173_c0_g2,TRINITY_DN73194_c1_g1,TRINITY_DN73944_c3_g3,TRINITY_DN77296_c1_g1,TRINITY_DN80965_c0_g4,TRINITY_DN82458_c1_g1,TRINITY_DN82502_c0_g1,TRINITY_DN82502_c0_g3,TRINITY_DN82642_c3_g2,TRINITY_DN85146_c1_g1,TRINITY_DN86425_c1_g1,TRINITY_DN86778_c1_g4,TRINITY_DN87713_c1_g2,TRINITY_DN88387_c0_g1,TRINITY_DN89487_c0_g3,TRINITY_DN91323_c1_g5,TRI…
GO:0010452	histone H3-K36 methylation	biological process	2/609	45/93642	0.03477	1	TRINITY_DN68255_c0_g1,TRINITY_DN75121_c0_g4	TRINITY_DN68255_c0_g1,TRINITY_DN75121_c0_g4
GO:0031408	oxylipin biosynthetic process	biological process	4/609	188/93642	0.03509	1	TRINITY_DN86087_c3_g5,TRINITY_DN90788_c0_g2,TRINITY_DN94151_c1_g1,TRINITY_DN95773_c0_g3	TRINITY_DN86087_c3_g5,TRINITY_DN90788_c0_g2,TRINITY_DN94151_c1_g1,TRINITY_DN95773_c0_g3
GO:0044786	cell cycle DNA replication	biological process	5/609	276/93642	0.03530	1	TRINITY_DN73145_c2_g1,TRINITY_DN80373_c0_g1,TRINITY_DN97736_c4_g5,TRINITY_DN97736_c4_g6,TRINITY_DN98683_c5_g1	TRINITY_DN73145_c2_g1,TRINITY_DN80373_c0_g1,TRINITY_DN97736_c4_g5,TRINITY_DN97736_c4_g6,TRINITY_DN98683_c5_g1
GO:0046854	phosphatidylinositol phosphorylation	biological process	3/609	110/93642	0.03542	1	TRINITY_DN76839_c0_g1,TRINITY_DN88395_c3_g2,TRINITY_DN99055_c10_g1	TRINITY_DN76839_c0_g1,TRINITY_DN88395_c3_g2,TRINITY_DN99055_c10_g1
GO:0048571	long-day photoperiodism	biological process	3/609	110/93642	0.03542	1	TRINITY_DN73324_c3_g1,TRINITY_DN84523_c1_g1,TRINITY_DN87544_c1_g3	TRINITY_DN73324_c3_g1,TRINITY_DN84523_c1_g1,TRINITY_DN87544_c1_g3
GO:0010017	red or far-red light signaling pathway	biological process	4/609	189/93642	0.03567	1	TRINITY_DN66987_c0_g1,TRINITY_DN84523_c1_g1,TRINITY_DN87544_c1_g3,TRINITY_DN98591_c5_g2	TRINITY_DN66987_c0_g1,TRINITY_DN84523_c1_g1,TRINITY_DN87544_c1_g3,TRINITY_DN98591_c5_g2
GO:0042743	hydrogen peroxide metabolic process	biological process	7/609	471/93642	0.03589	1	TRINITY_DN74684_c0_g2,TRINITY_DN80065_c0_g3,TRINITY_DN80835_c0_g1,TRINITY_DN86350_c0_g1,TRINITY_DN86350_c0_g2,TRINITY_DN90918_c0_g2,TRINITY_DN97445_c4_g1	TRINITY_DN74684_c0_g2,TRINITY_DN80065_c0_g3,TRINITY_DN80835_c0_g1,TRINITY_DN86350_c0_g1,TRINITY_DN86350_c0_g2,TRINITY_DN90918_c0_g2,TRINITY_DN97445_c4_g1
GO:0009584	detection of visible light	biological process	2/609	46/93642	0.03620	1	TRINITY_DN66987_c0_g1,TRINITY_DN98591_c5_g2	TRINITY_DN66987_c0_g1,TRINITY_DN98591_c5_g2
GO:0006972	hyperosmotic response	biological process	4/609	191/93642	0.03685	1	TRINITY_DN64594_c0_g1,TRINITY_DN82458_c1_g1,TRINITY_DN85282_c1_g2,TRINITY_DN93484_c0_g1	TRINITY_DN64594_c0_g1,TRINITY_DN82458_c1_g1,TRINITY_DN85282_c1_g2,TRINITY_DN93484_c0_g1
GO:0031407	oxylipin metabolic process	biological process	4/609	191/93642	0.03685	1	TRINITY_DN86087_c3_g5,TRINITY_DN90788_c0_g2,TRINITY_DN94151_c1_g1,TRINITY_DN95773_c0_g3	TRINITY_DN86087_c3_g5,TRINITY_DN90788_c0_g2,TRINITY_DN94151_c1_g1,TRINITY_DN95773_c0_g3
GO:0071489	cellular response to red or far red light	biological process	4/609	191/93642	0.03685	1	TRINITY_DN66987_c0_g1,TRINITY_DN84523_c1_g1,TRINITY_DN87544_c1_g3,TRINITY_DN98591_c5_g2	TRINITY_DN66987_c0_g1,TRINITY_DN84523_c1_g1,TRINITY_DN87544_c1_g3,TRINITY_DN98591_c5_g2
GO:0046834	lipid phosphorylation	biological process	3/609	112/93642	0.03706	1	TRINITY_DN76839_c0_g1,TRINITY_DN88395_c3_g2,TRINITY_DN99055_c10_g1	TRINITY_DN76839_c0_g1,TRINITY_DN88395_c3_g2,TRINITY_DN99055_c10_g1
GO:0048825	cotyledon development	biological process	3/609	113/93642	0.03789	1	TRINITY_DN68079_c0_g2,TRINITY_DN80884_c0_g1,TRINITY_DN98453_c1_g1	TRINITY_DN68079_c0_g2,TRINITY_DN80884_c0_g1,TRINITY_DN98453_c1_g1
GO:0010157	response to chlorate	biological process	1/609	6/93642	0.03839	1	TRINITY_DN93209_c1_g1	TRINITY_DN93209_c1_g1
GO:0010266	response to vitamin B1	biological process	1/609	6/93642	0.03839	1	TRINITY_DN83303_c2_g2	TRINITY_DN83303_c2_g2
GO:0050892	intestinal absorption	biological process	1/609	6/93642	0.03839	1	TRINITY_DN94542_c0_g6	TRINITY_DN94542_c0_g6
GO:0090057	root radial pattern formation	biological process	1/609	6/93642	0.03839	1	TRINITY_DN88078_c1_g2	TRINITY_DN88078_c1_g2
GO:1901222	regulation of NIK/NF-kappaB signaling	biological process	1/609	6/93642	0.03839	1	TRINITY_DN91317_c1_g5	TRINITY_DN91317_c1_g5
GO:1901224	positive regulation of NIK/NF-kappaB signaling	biological process	1/609	6/93642	0.03839	1	TRINITY_DN91317_c1_g5	TRINITY_DN91317_c1_g5
GO:1902195	isovaleryl-CoA(4-) metabolic process	biological process	1/609	6/93642	0.03839	1	TRINITY_DN87622_c1_g4	TRINITY_DN87622_c1_g4
GO:1902196	isovaleryl-CoA(4-) catabolic process	biological process	1/609	6/93642	0.03839	1	TRINITY_DN87622_c1_g4	TRINITY_DN87622_c1_g4
GO:1902198	3-methylbut-2-enoyl-CoA(4-) metabolic process	biological process	1/609	6/93642	0.03839	1	TRINITY_DN87622_c1_g4	TRINITY_DN87622_c1_g4
GO:1990937	xylan acetylation	biological process	1/609	6/93642	0.03839	1	TRINITY_DN82528_c0_g1	TRINITY_DN82528_c0_g1
GO:0010305	leaf vascular tissue pattern formation	biological process	3/609	114/93642	0.03873	1	TRINITY_DN77929_c0_g2,TRINITY_DN94172_c0_g1,TRINITY_DN98453_c1_g1	TRINITY_DN77929_c0_g2,TRINITY_DN94172_c0_g1,TRINITY_DN98453_c1_g1
GO:0010431	seed maturation	biological process	3/609	114/93642	0.03873	1	TRINITY_DN82761_c1_g1,TRINITY_DN85282_c1_g2,TRINITY_DN92690_c1_g1	TRINITY_DN82761_c1_g1,TRINITY_DN85282_c1_g2,TRINITY_DN92690_c1_g1
GO:2000028	regulation of photoperiodism, flowering	biological process	3/609	114/93642	0.03873	1	TRINITY_DN84523_c1_g1,TRINITY_DN87544_c1_g3,TRINITY_DN93239_c0_g2	TRINITY_DN84523_c1_g1,TRINITY_DN87544_c1_g3,TRINITY_DN93239_c0_g2
GO:0030301	cholesterol transport	biological process	2/609	48/93642	0.03912	1	TRINITY_DN82781_c0_g1,TRINITY_DN94542_c0_g6	TRINITY_DN82781_c0_g1,TRINITY_DN94542_c0_g6
GO:0052695	cellular glucuronidation	biological process	4/609	196/93642	0.03989	1	TRINITY_DN69932_c0_g3,TRINITY_DN81990_c0_g1,TRINITY_DN87084_c1_g4,TRINITY_DN95367_c0_g1	TRINITY_DN69932_c0_g3,TRINITY_DN81990_c0_g1,TRINITY_DN87084_c1_g4,TRINITY_DN95367_c0_g1
GO:0052696	flavonoid glucuronidation	biological process	4/609	196/93642	0.03989	1	TRINITY_DN69932_c0_g3,TRINITY_DN81990_c0_g1,TRINITY_DN87084_c1_g4,TRINITY_DN95367_c0_g1	TRINITY_DN69932_c0_g3,TRINITY_DN81990_c0_g1,TRINITY_DN87084_c1_g4,TRINITY_DN95367_c0_g1
GO:0044273	sulfur compound catabolic process	biological process	3/609	116/93642	0.04045	1	TRINITY_DN83600_c0_g1,TRINITY_DN87622_c1_g4,TRINITY_DN94383_c0_g1	TRINITY_DN83600_c0_g1,TRINITY_DN87622_c1_g4,TRINITY_DN94383_c0_g1
GO:0032776	DNA methylation on cytosine	biological process	2/609	49/93642	0.04062	1	TRINITY_DN91784_c1_g1,TRINITY_DN94594_c0_g1	TRINITY_DN91784_c1_g1,TRINITY_DN94594_c0_g1
GO:0044550	secondary metabolite biosynthetic process	biological process	16/609	1510/93642	0.04093	1	TRINITY_DN72604_c1_g1,TRINITY_DN77989_c3_g2,TRINITY_DN78453_c0_g1,TRINITY_DN80907_c1_g1,TRINITY_DN81440_c1_g1,TRINITY_DN81857_c0_g1,TRINITY_DN81857_c0_g3,TRINITY_DN85704_c1_g3,TRINITY_DN89775_c2_g5,TRINITY_DN92418_c0_g2,TRINITY_DN92708_c1_g2,TRINITY_DN93967_c0_g1,TRINITY_DN94629_c2_g1,TRINITY_DN95201_c2_g4,TRINITY_DN96935_c2_g2,TRINITY_DN98228_c0_g1	TRINITY_DN72604_c1_g1,TRINITY_DN77989_c3_g2,TRINITY_DN78453_c0_g1,TRINITY_DN80907_c1_g1,TRINITY_DN81440_c1_g1,TRINITY_DN81857_c0_g1,TRINITY_DN81857_c0_g3,TRINITY_DN85704_c1_g3,TRINITY_DN89775_c2_g5,TRINITY_DN92418_c0_g2,TRINITY_DN92708_c1_g2,TRINITY_DN93967_c0_g1,TRINITY_DN94629_c2_g1,TRINITY_DN95201_c2_g4,TRINITY_DN96935_c2_g2,TRINITY_DN98228_c0_g1
GO:0000226	microtubule cytoskeleton organization	biological process	10/609	809/93642	0.04108	1	TRINITY_DN73679_c1_g2,TRINITY_DN77234_c1_g2,TRINITY_DN77469_c0_g1,TRINITY_DN79570_c1_g1,TRINITY_DN80532_c2_g2,TRINITY_DN80965_c0_g4,TRINITY_DN86240_c0_g1,TRINITY_DN93760_c2_g1,TRINITY_DN98444_c1_g2,TRINITY_DN98607_c2_g1	TRINITY_DN73679_c1_g2,TRINITY_DN77234_c1_g2,TRINITY_DN77469_c0_g1,TRINITY_DN79570_c1_g1,TRINITY_DN80532_c2_g2,TRINITY_DN80965_c0_g4,TRINITY_DN86240_c0_g1,TRINITY_DN93760_c2_g1,TRINITY_DN98444_c1_g2,TRINITY_DN98607_c2_g1
GO:0007602	phototransduction	biological process	4/609	198/93642	0.04115	1	TRINITY_DN66987_c0_g1,TRINITY_DN84523_c1_g1,TRINITY_DN87544_c1_g3,TRINITY_DN98591_c5_g2	TRINITY_DN66987_c0_g1,TRINITY_DN84523_c1_g1,TRINITY_DN87544_c1_g3,TRINITY_DN98591_c5_g2
GO:0051261	protein depolymerization	biological process	4/609	199/93642	0.04179	1	TRINITY_DN72905_c0_g4,TRINITY_DN77469_c0_g1,TRINITY_DN93760_c2_g1,TRINITY_DN96976_c1_g1	TRINITY_DN72905_c0_g4,TRINITY_DN77469_c0_g1,TRINITY_DN93760_c2_g1,TRINITY_DN96976_c1_g1
GO:0010038	response to metal ion	biological process	17/609	1637/93642	0.04199	1	TRINITY_DN63286_c0_g1,TRINITY_DN67158_c0_g1,TRINITY_DN70911_c2_g1,TRINITY_DN72281_c0_g1,TRINITY_DN73374_c1_g2,TRINITY_DN75619_c0_g1,TRINITY_DN75761_c2_g1,TRINITY_DN78240_c2_g4,TRINITY_DN81308_c1_g1,TRINITY_DN81660_c3_g2,TRINITY_DN82801_c0_g1,TRINITY_DN86326_c0_g2,TRINITY_DN87707_c0_g1,TRINITY_DN90512_c0_g2,TRINITY_DN93967_c0_g1,TRINITY_DN97161_c2_g1,TRINITY_DN97471_c1_g1	TRINITY_DN63286_c0_g1,TRINITY_DN67158_c0_g1,TRINITY_DN70911_c2_g1,TRINITY_DN72281_c0_g1,TRINITY_DN73374_c1_g2,TRINITY_DN75619_c0_g1,TRINITY_DN75761_c2_g1,TRINITY_DN78240_c2_g4,TRINITY_DN81308_c1_g1,TRINITY_DN81660_c3_g2,TRINITY_DN82801_c0_g1,TRINITY_DN86326_c0_g2,TRINITY_DN87707_c0_g1,TRINITY_DN90512_c0_g2,TRINITY_DN93967_c0_g1,TRINITY_DN97161_c2_g1,TRINITY_DN97471_c1_g1
GO:0000919	cell plate assembly	biological process	2/609	50/93642	0.04213	1	TRINITY_DN75706_c0_g2,TRINITY_DN98258_c0_g1	TRINITY_DN75706_c0_g2,TRINITY_DN98258_c0_g1
GO:0043650	dicarboxylic acid biosynthetic process	biological process	6/609	389/93642	0.04314	1	TRINITY_DN79475_c1_g2,TRINITY_DN81308_c1_g1,TRINITY_DN88249_c2_g1,TRINITY_DN96037_c1_g1,TRINITY_DN96159_c1_g1,TRINITY_DN96704_c2_g2	TRINITY_DN79475_c1_g2,TRINITY_DN81308_c1_g1,TRINITY_DN88249_c2_g1,TRINITY_DN96037_c1_g1,TRINITY_DN96159_c1_g1,TRINITY_DN96704_c2_g2
GO:0048869	cellular developmental process	biological process	44/609	5170/93642	0.04353	1	TRINITY_DN70156_c0_g5,TRINITY_DN70911_c2_g1,TRINITY_DN73145_c2_g1,TRINITY_DN73374_c1_g2,TRINITY_DN73679_c0_g1,TRINITY_DN74691_c0_g3,TRINITY_DN74996_c0_g1,TRINITY_DN77296_c1_g1,TRINITY_DN78801_c1_g1,TRINITY_DN80004_c0_g1,TRINITY_DN80373_c0_g1,TRINITY_DN82801_c0_g1,TRINITY_DN84175_c3_g2,TRINITY_DN84523_c1_g1,TRINITY_DN86344_c0_g1,TRINITY_DN86425_c1_g1,TRINITY_DN86504_c0_g1,TRINITY_DN87544_c1_g3,TRI…	TRINITY_DN70156_c0_g5,TRINITY_DN70911_c2_g1,TRINITY_DN73145_c2_g1,TRINITY_DN73374_c1_g2,TRINITY_DN73679_c0_g1,TRINITY_DN74691_c0_g3,TRINITY_DN74996_c0_g1,TRINITY_DN77296_c1_g1,TRINITY_DN78801_c1_g1,TRINITY_DN80004_c0_g1,TRINITY_DN80373_c0_g1,TRINITY_DN82801_c0_g1,TRINITY_DN84175_c3_g2,TRINITY_DN84523_c1_g1,TRINITY_DN86344_c0_g1,TRINITY_DN86425_c1_g1,TRINITY_DN86504_c0_g1,TRINITY_DN87544_c1_g3,TRI…
GO:0007076	mitotic chromosome condensation	biological process	2/609	51/93642	0.04366	1	TRINITY_DN97993_c1_g1,TRINITY_DN98607_c2_g1	TRINITY_DN97993_c1_g1,TRINITY_DN98607_c2_g1
GO:0019585	glucuronate metabolic process	biological process	4/609	202/93642	0.04373	1	TRINITY_DN69932_c0_g3,TRINITY_DN81990_c0_g1,TRINITY_DN87084_c1_g4,TRINITY_DN95367_c0_g1	TRINITY_DN69932_c0_g3,TRINITY_DN81990_c0_g1,TRINITY_DN87084_c1_g4,TRINITY_DN95367_c0_g1
GO:0001505	regulation of neurotransmitter levels	biological process	8/609	599/93642	0.04406	1	TRINITY_DN76611_c0_g2,TRINITY_DN79475_c1_g2,TRINITY_DN81308_c1_g1,TRINITY_DN81660_c3_g2,TRINITY_DN88748_c0_g4,TRINITY_DN96037_c1_g1,TRINITY_DN96704_c2_g2,TRINITY_DN97471_c0_g2	TRINITY_DN76611_c0_g2,TRINITY_DN79475_c1_g2,TRINITY_DN81308_c1_g1,TRINITY_DN81660_c3_g2,TRINITY_DN88748_c0_g4,TRINITY_DN96037_c1_g1,TRINITY_DN96704_c2_g2,TRINITY_DN97471_c0_g2
GO:0048366	leaf development	biological process	10/609	821/93642	0.04457	1	TRINITY_DN68079_c0_g2,TRINITY_DN70487_c0_g1,TRINITY_DN73679_c0_g1,TRINITY_DN76045_c0_g1,TRINITY_DN80884_c0_g1,TRINITY_DN84469_c1_g1,TRINITY_DN97471_c1_g1,TRINITY_DN97709_c0_g1,TRINITY_DN98191_c1_g2,TRINITY_DN98453_c1_g1	TRINITY_DN68079_c0_g2,TRINITY_DN70487_c0_g1,TRINITY_DN73679_c0_g1,TRINITY_DN76045_c0_g1,TRINITY_DN80884_c0_g1,TRINITY_DN84469_c1_g1,TRINITY_DN97471_c1_g1,TRINITY_DN97709_c0_g1,TRINITY_DN98191_c1_g2,TRINITY_DN98453_c1_g1
GO:0007447	imaginal disc pattern formation	biological process	1/609	7/93642	0.04465	1	TRINITY_DN98212_c0_g1	TRINITY_DN98212_c0_g1
GO:0009233	menaquinone metabolic process	biological process	1/609	7/93642	0.04465	1	TRINITY_DN87881_c0_g2	TRINITY_DN87881_c0_g2
GO:0009234	menaquinone biosynthetic process	biological process	1/609	7/93642	0.04465	1	TRINITY_DN87881_c0_g2	TRINITY_DN87881_c0_g2
GO:0009717	isoflavonoid biosynthetic process	biological process	1/609	7/93642	0.04465	1	TRINITY_DN85704_c1_g3	TRINITY_DN85704_c1_g3
GO:0010566	regulation of ketone biosynthetic process	biological process	1/609	7/93642	0.04465	1	TRINITY_DN81921_c0_g1	TRINITY_DN81921_c0_g1
GO:0035222	wing disc pattern formation	biological process	1/609	7/93642	0.04465	1	TRINITY_DN98212_c0_g1	TRINITY_DN98212_c0_g1
GO:0042425	choline biosynthetic process	biological process	1/609	7/93642	0.04465	1	TRINITY_DN88748_c0_g4	TRINITY_DN88748_c0_g4
GO:0046287	isoflavonoid metabolic process	biological process	1/609	7/93642	0.04465	1	TRINITY_DN85704_c1_g3	TRINITY_DN85704_c1_g3
GO:0044255	cellular lipid metabolic process	biological process	47/609	5589/93642	0.04473	1	TRINITY_DN68792_c0_g1,TRINITY_DN69416_c2_g1,TRINITY_DN70885_c1_g1,TRINITY_DN73654_c0_g1,TRINITY_DN74648_c0_g1,TRINITY_DN74872_c1_g1,TRINITY_DN75121_c0_g4,TRINITY_DN75228_c3_g1,TRINITY_DN76839_c0_g1,TRINITY_DN77435_c0_g5,TRINITY_DN77743_c0_g1,TRINITY_DN79849_c1_g1,TRINITY_DN82775_c4_g1,TRINITY_DN85750_c2_g1,TRINITY_DN85885_c3_g1,TRINITY_DN86087_c3_g5,TRINITY_DN86778_c1_g4,TRINITY_DN87125_c0_g3,TRI…	TRINITY_DN68792_c0_g1,TRINITY_DN69416_c2_g1,TRINITY_DN70885_c1_g1,TRINITY_DN73654_c0_g1,TRINITY_DN74648_c0_g1,TRINITY_DN74872_c1_g1,TRINITY_DN75121_c0_g4,TRINITY_DN75228_c3_g1,TRINITY_DN76839_c0_g1,TRINITY_DN77435_c0_g5,TRINITY_DN77743_c0_g1,TRINITY_DN79849_c1_g1,TRINITY_DN82775_c4_g1,TRINITY_DN85750_c2_g1,TRINITY_DN85885_c3_g1,TRINITY_DN86087_c3_g5,TRINITY_DN86778_c1_g4,TRINITY_DN87125_c0_g3,TRI…
GO:0048523	negative regulation of cellular process	biological process	40/609	4641/93642	0.04489	1	TRINITY_DN68434_c0_g1,TRINITY_DN69726_c2_g1,TRINITY_DN70487_c0_g1,TRINITY_DN70723_c1_g1,TRINITY_DN72819_c0_g1,TRINITY_DN72905_c0_g4,TRINITY_DN74568_c0_g3,TRINITY_DN77469_c0_g1,TRINITY_DN80370_c4_g5,TRINITY_DN83047_c1_g1,TRINITY_DN84842_c1_g1,TRINITY_DN85282_c1_g2,TRINITY_DN85980_c1_g1,TRINITY_DN87261_c0_g2,TRINITY_DN88959_c0_g1,TRINITY_DN89410_c0_g2,TRINITY_DN90554_c1_g1,TRINITY_DN91545_c0_g4,TRI…	TRINITY_DN68434_c0_g1,TRINITY_DN69726_c2_g1,TRINITY_DN70487_c0_g1,TRINITY_DN70723_c1_g1,TRINITY_DN72819_c0_g1,TRINITY_DN72905_c0_g4,TRINITY_DN74568_c0_g3,TRINITY_DN77469_c0_g1,TRINITY_DN80370_c4_g5,TRINITY_DN83047_c1_g1,TRINITY_DN84842_c1_g1,TRINITY_DN85282_c1_g2,TRINITY_DN85980_c1_g1,TRINITY_DN87261_c0_g2,TRINITY_DN88959_c0_g1,TRINITY_DN89410_c0_g2,TRINITY_DN90554_c1_g1,TRINITY_DN91545_c0_g4,TRI…
GO:0048638	regulation of developmental growth	biological process	8/609	602/93642	0.04513	1	TRINITY_DN70911_c2_g1,TRINITY_DN73374_c1_g2,TRINITY_DN81232_c0_g1,TRINITY_DN86504_c0_g1,TRINITY_DN87707_c0_g1,TRINITY_DN89685_c1_g2,TRINITY_DN94365_c2_g2,TRINITY_DN97161_c2_g1	TRINITY_DN70911_c2_g1,TRINITY_DN73374_c1_g2,TRINITY_DN81232_c0_g1,TRINITY_DN86504_c0_g1,TRINITY_DN87707_c0_g1,TRINITY_DN89685_c1_g2,TRINITY_DN94365_c2_g2,TRINITY_DN97161_c2_g1
GO:0009862	systemic acquired resistance, salicylic acid mediated signaling pathway	biological process	2/609	52/93642	0.04522	1	TRINITY_DN75228_c3_g1,TRINITY_DN93940_c0_g3	TRINITY_DN75228_c3_g1,TRINITY_DN93940_c0_g3
GO:0031122	cytoplasmic microtubule organization	biological process	4/609	205/93642	0.04573	1	TRINITY_DN77469_c0_g1,TRINITY_DN80965_c0_g4,TRINITY_DN86240_c0_g1,TRINITY_DN93760_c2_g1	TRINITY_DN77469_c0_g1,TRINITY_DN80965_c0_g4,TRINITY_DN86240_c0_g1,TRINITY_DN93760_c2_g1
GO:0048015	phosphatidylinositol-mediated signaling	biological process	3/609	122/93642	0.04581	1	TRINITY_DN76839_c0_g1,TRINITY_DN88395_c3_g2,TRINITY_DN99055_c10_g1	TRINITY_DN76839_c0_g1,TRINITY_DN88395_c3_g2,TRINITY_DN99055_c10_g1
GO:0046686	response to cadmium ion	biological process	12/609	1056/93642	0.04606	1	TRINITY_DN63286_c0_g1,TRINITY_DN70911_c2_g1,TRINITY_DN73374_c1_g2,TRINITY_DN75761_c2_g1,TRINITY_DN78240_c2_g4,TRINITY_DN81308_c1_g1,TRINITY_DN81660_c3_g2,TRINITY_DN82801_c0_g1,TRINITY_DN86326_c0_g2,TRINITY_DN87707_c0_g1,TRINITY_DN90512_c0_g2,TRINITY_DN97161_c2_g1	TRINITY_DN63286_c0_g1,TRINITY_DN70911_c2_g1,TRINITY_DN73374_c1_g2,TRINITY_DN75761_c2_g1,TRINITY_DN78240_c2_g4,TRINITY_DN81308_c1_g1,TRINITY_DN81660_c3_g2,TRINITY_DN82801_c0_g1,TRINITY_DN86326_c0_g2,TRINITY_DN87707_c0_g1,TRINITY_DN90512_c0_g2,TRINITY_DN97161_c2_g1
GO:0002252	immune effector process	biological process	6/609	396/93642	0.04631	1	TRINITY_DN71424_c1_g2,TRINITY_DN71889_c1_g1,TRINITY_DN73444_c1_g3,TRINITY_DN74503_c1_g2,TRINITY_DN83048_c1_g1,TRINITY_DN93594_c0_g1	TRINITY_DN71424_c1_g2,TRINITY_DN71889_c1_g1,TRINITY_DN73444_c1_g3,TRINITY_DN74503_c1_g2,TRINITY_DN83048_c1_g1,TRINITY_DN93594_c0_g1
GO:2000280	regulation of root development	biological process	3/609	124/93642	0.04767	1	TRINITY_DN81232_c0_g1,TRINITY_DN89685_c1_g2,TRINITY_DN95125_c2_g1	TRINITY_DN81232_c0_g1,TRINITY_DN89685_c1_g2,TRINITY_DN95125_c2_g1
GO:0010608	posttranscriptional regulation of gene expression	biological process	18/609	1793/93642	0.04861	1	TRINITY_DN70723_c1_g1,TRINITY_DN71424_c1_g2,TRINITY_DN71889_c1_g1,TRINITY_DN72303_c0_g1,TRINITY_DN74503_c1_g2,TRINITY_DN74568_c0_g3,TRINITY_DN84336_c1_g2,TRINITY_DN88221_c0_g2,TRINITY_DN89096_c1_g3,TRINITY_DN90270_c0_g2,TRINITY_DN91297_c0_g1,TRINITY_DN92771_c0_g1,TRINITY_DN93594_c0_g1,TRINITY_DN94340_c0_g1,TRINITY_DN95530_c0_g1,TRINITY_DN96733_c2_g2,TRINITY_DN97759_c1_g2,TRINITY_DN98591_c5_g2	TRINITY_DN70723_c1_g1,TRINITY_DN71424_c1_g2,TRINITY_DN71889_c1_g1,TRINITY_DN72303_c0_g1,TRINITY_DN74503_c1_g2,TRINITY_DN74568_c0_g3,TRINITY_DN84336_c1_g2,TRINITY_DN88221_c0_g2,TRINITY_DN89096_c1_g3,TRINITY_DN90270_c0_g2,TRINITY_DN91297_c0_g1,TRINITY_DN92771_c0_g1,TRINITY_DN93594_c0_g1,TRINITY_DN94340_c0_g1,TRINITY_DN95530_c0_g1,TRINITY_DN96733_c2_g2,TRINITY_DN97759_c1_g2,TRINITY_DN98591_c5_g2
GO:0007093	mitotic cell cycle checkpoint	biological process	4/609	210/93642	0.04916	1	TRINITY_DN69726_c2_g1,TRINITY_DN84842_c1_g1,TRINITY_DN93699_c0_g1,TRINITY_DN96671_c1_g1	TRINITY_DN69726_c2_g1,TRINITY_DN84842_c1_g1,TRINITY_DN93699_c0_g1,TRINITY_DN96671_c1_g1
GO:0009826	unidimensional cell growth	biological process	11/609	952/93642	0.04955	1	TRINITY_DN70911_c2_g1,TRINITY_DN73374_c1_g2,TRINITY_DN73679_c0_g1,TRINITY_DN86504_c0_g1,TRINITY_DN87707_c0_g1,TRINITY_DN88748_c0_g4,TRINITY_DN89072_c1_g3,TRINITY_DN92410_c0_g3,TRINITY_DN96030_c0_g1,TRINITY_DN97161_c2_g1,TRINITY_DN98259_c2_g3	TRINITY_DN70911_c2_g1,TRINITY_DN73374_c1_g2,TRINITY_DN73679_c0_g1,TRINITY_DN86504_c0_g1,TRINITY_DN87707_c0_g1,TRINITY_DN88748_c0_g4,TRINITY_DN89072_c1_g3,TRINITY_DN92410_c0_g3,TRINITY_DN96030_c0_g1,TRINITY_DN97161_c2_g1,TRINITY_DN98259_c2_g3
GO:0010360	negative regulation of anion channel activity	biological process	1/609	8/93642	0.05086	1	TRINITY_DN91644_c0_g1	TRINITY_DN91644_c0_g1
GO:0043617	cellular response to sucrose starvation	biological process	1/609	8/93642	0.05086	1	TRINITY_DN76380_c0_g1	TRINITY_DN76380_c0_g1
GO:0048451	petal formation	biological process	1/609	8/93642	0.05086	1	TRINITY_DN82801_c0_g1	TRINITY_DN82801_c0_g1
GO:0080170	hydrogen peroxide transmembrane transport	biological process	1/609	8/93642	0.05086	1	TRINITY_DN77049_c0_g3	TRINITY_DN77049_c0_g3
GO:0032011	ARF protein signal transduction	biological process	2/609	56/93642	0.05164	1	TRINITY_DN96030_c0_g1,TRINITY_DN98395_c1_g2	TRINITY_DN96030_c0_g1,TRINITY_DN98395_c1_g2
GO:0032012	regulation of ARF protein signal transduction	biological process	2/609	56/93642	0.05164	1	TRINITY_DN96030_c0_g1,TRINITY_DN98395_c1_g2	TRINITY_DN96030_c0_g1,TRINITY_DN98395_c1_g2
GO:0018298	protein-chromophore linkage	biological process	4/609	214/93642	0.05201	1	TRINITY_DN66987_c0_g1,TRINITY_DN97143_c3_g2,TRINITY_DN97143_c3_g3,TRINITY_DN98591_c5_g2	TRINITY_DN66987_c0_g1,TRINITY_DN97143_c3_g2,TRINITY_DN97143_c3_g3,TRINITY_DN98591_c5_g2
GO:0006935	chemotaxis	biological process	6/609	410/93642	0.05308	1	TRINITY_DN70911_c2_g1,TRINITY_DN73374_c1_g2,TRINITY_DN87707_c0_g1,TRINITY_DN88188_c0_g5,TRINITY_DN88748_c0_g4,TRINITY_DN97161_c2_g1	TRINITY_DN70911_c2_g1,TRINITY_DN73374_c1_g2,TRINITY_DN87707_c0_g1,TRINITY_DN88188_c0_g5,TRINITY_DN88748_c0_g4,TRINITY_DN97161_c2_g1
GO:0031347	regulation of defense response	biological process	11/609	964/93642	0.05323	1	TRINITY_DN73444_c1_g3,TRINITY_DN75121_c0_g4,TRINITY_DN82769_c1_g2,TRINITY_DN83048_c1_g1,TRINITY_DN84678_c0_g1,TRINITY_DN90493_c3_g1,TRINITY_DN94207_c2_g2,TRINITY_DN94216_c0_g2,TRINITY_DN97471_c1_g1,TRINITY_DN97970_c2_g1,TRINITY_DN99016_c7_g5	TRINITY_DN73444_c1_g3,TRINITY_DN75121_c0_g4,TRINITY_DN82769_c1_g2,TRINITY_DN83048_c1_g1,TRINITY_DN84678_c0_g1,TRINITY_DN90493_c3_g1,TRINITY_DN94207_c2_g2,TRINITY_DN94216_c0_g2,TRINITY_DN97471_c1_g1,TRINITY_DN97970_c2_g1,TRINITY_DN99016_c7_g5
GO:0006517	protein deglycosylation	biological process	2/609	57/93642	0.05330	1	TRINITY_DN96045_c0_g1,TRINITY_DN99036_c3_g3	TRINITY_DN96045_c0_g1,TRINITY_DN99036_c3_g3
GO:0010769	regulation of cell morphogenesis involved in differentiation	biological process	5/609	312/93642	0.05441	1	TRINITY_DN70911_c2_g1,TRINITY_DN73374_c1_g2,TRINITY_DN86504_c0_g1,TRINITY_DN87707_c0_g1,TRINITY_DN97161_c2_g1	TRINITY_DN70911_c2_g1,TRINITY_DN73374_c1_g2,TRINITY_DN86504_c0_g1,TRINITY_DN87707_c0_g1,TRINITY_DN97161_c2_g1
GO:0009992	cellular water homeostasis	biological process	3/609	131/93642	0.05448	1	TRINITY_DN77049_c0_g3,TRINITY_DN81058_c1_g3,TRINITY_DN86879_c0_g3	TRINITY_DN77049_c0_g3,TRINITY_DN81058_c1_g3,TRINITY_DN86879_c0_g3
GO:0009583	detection of light stimulus	biological process	4/609	218/93642	0.05494	1	TRINITY_DN66987_c0_g1,TRINITY_DN84523_c1_g1,TRINITY_DN87544_c1_g3,TRINITY_DN98591_c5_g2	TRINITY_DN66987_c0_g1,TRINITY_DN84523_c1_g1,TRINITY_DN87544_c1_g3,TRINITY_DN98591_c5_g2
GO:0009914	hormone transport	biological process	5/609	313/93642	0.05502	1	TRINITY_DN74096_c1_g1,TRINITY_DN95710_c3_g2,TRINITY_DN96030_c0_g1,TRINITY_DN97471_c1_g1,TRINITY_DN97936_c1_g1	TRINITY_DN74096_c1_g1,TRINITY_DN95710_c3_g2,TRINITY_DN96030_c0_g1,TRINITY_DN97471_c1_g1,TRINITY_DN97936_c1_g1
GO:0042330	taxis	biological process	6/609	414/93642	0.05512	1	TRINITY_DN70911_c2_g1,TRINITY_DN73374_c1_g2,TRINITY_DN87707_c0_g1,TRINITY_DN88188_c0_g5,TRINITY_DN88748_c0_g4,TRINITY_DN97161_c2_g1	TRINITY_DN70911_c2_g1,TRINITY_DN73374_c1_g2,TRINITY_DN87707_c0_g1,TRINITY_DN88188_c0_g5,TRINITY_DN88748_c0_g4,TRINITY_DN97161_c2_g1
GO:0006338	chromatin remodeling	biological process	7/609	520/93642	0.05544	1	TRINITY_DN70725_c1_g7,TRINITY_DN93850_c1_g5,TRINITY_DN96369_c2_g1,TRINITY_DN96369_c2_g3,TRINITY_DN97970_c2_g1,TRINITY_DN98212_c0_g1,TRINITY_DN98607_c2_g1	TRINITY_DN70725_c1_g7,TRINITY_DN93850_c1_g5,TRINITY_DN96369_c2_g1,TRINITY_DN96369_c2_g3,TRINITY_DN97970_c2_g1,TRINITY_DN98212_c0_g1,TRINITY_DN98607_c2_g1
GO:0010118	stomatal movement	biological process	5/609	314/93642	0.05562	1	TRINITY_DN90825_c1_g2,TRINITY_DN91644_c0_g1,TRINITY_DN93904_c1_g2,TRINITY_DN96028_c0_g1,TRINITY_DN97471_c1_g1	TRINITY_DN90825_c1_g2,TRINITY_DN91644_c0_g1,TRINITY_DN93904_c1_g2,TRINITY_DN96028_c0_g1,TRINITY_DN97471_c1_g1
GO:0009853	photorespiration	biological process	3/609	133/93642	0.05650	1	TRINITY_DN79475_c1_g2,TRINITY_DN95226_c1_g1,TRINITY_DN98131_c0_g1	TRINITY_DN79475_c1_g2,TRINITY_DN95226_c1_g1,TRINITY_DN98131_c0_g1
GO:0006536	glutamate metabolic process	biological process	5/609	316/93642	0.05685	1	TRINITY_DN79475_c1_g2,TRINITY_DN81308_c1_g1,TRINITY_DN88249_c2_g1,TRINITY_DN96037_c1_g1,TRINITY_DN96704_c2_g2	TRINITY_DN79475_c1_g2,TRINITY_DN81308_c1_g1,TRINITY_DN88249_c2_g1,TRINITY_DN96037_c1_g1,TRINITY_DN96704_c2_g2
GO:0008354	germ cell migration	biological process	1/609	9/93642	0.05703	1	TRINITY_DN98607_c2_g1	TRINITY_DN98607_c2_g1
GO:0009871	jasmonic acid and ethylene-dependent systemic resistance, ethylene mediated signaling pathway	biological process	1/609	9/93642	0.05703	1	TRINITY_DN97471_c1_g1	TRINITY_DN97471_c1_g1
GO:0010201	response to continuous far red light stimulus by the high-irradiance response system	biological process	1/609	9/93642	0.05703	1	TRINITY_DN98591_c5_g2	TRINITY_DN98591_c5_g2
GO:0046445	benzyl isoquinoline alkaloid metabolic process	biological process	1/609	9/93642	0.05703	1	TRINITY_DN87069_c0_g2	TRINITY_DN87069_c0_g2
GO:0048865	stem cell fate commitment	biological process	1/609	9/93642	0.05703	1	TRINITY_DN90685_c2_g1	TRINITY_DN90685_c2_g1
GO:0048867	stem cell fate determination	biological process	1/609	9/93642	0.05703	1	TRINITY_DN90685_c2_g1	TRINITY_DN90685_c2_g1
GO:0071272	morphine metabolic process	biological process	1/609	9/93642	0.05703	1	TRINITY_DN98849_c3_g1	TRINITY_DN98849_c3_g1
GO:0097295	morphine biosynthetic process	biological process	1/609	9/93642	0.05703	1	TRINITY_DN98849_c3_g1	TRINITY_DN98849_c3_g1
GO:1901010	(S)-reticuline metabolic process	biological process	1/609	9/93642	0.05703	1	TRINITY_DN87069_c0_g2	TRINITY_DN87069_c0_g2
GO:0009267	cellular response to starvation	biological process	9/609	745/93642	0.05710	1	TRINITY_DN76380_c0_g1,TRINITY_DN86210_c0_g1,TRINITY_DN90512_c0_g2,TRINITY_DN90685_c2_g1,TRINITY_DN93943_c0_g3,TRINITY_DN94649_c0_g3,TRINITY_DN96351_c1_g2,TRINITY_DN96502_c0_g2,TRINITY_DN96502_c0_g4	TRINITY_DN76380_c0_g1,TRINITY_DN86210_c0_g1,TRINITY_DN90512_c0_g2,TRINITY_DN90685_c2_g1,TRINITY_DN93943_c0_g3,TRINITY_DN94649_c0_g3,TRINITY_DN96351_c1_g2,TRINITY_DN96502_c0_g2,TRINITY_DN96502_c0_g4
GO:0022604	regulation of cell morphogenesis	biological process	11/609	980/93642	0.05842	1	TRINITY_DN70911_c2_g1,TRINITY_DN73374_c1_g2,TRINITY_DN74996_c0_g1,TRINITY_DN77296_c1_g1,TRINITY_DN86425_c1_g1,TRINITY_DN86504_c0_g1,TRINITY_DN87707_c0_g1,TRINITY_DN97121_c1_g1,TRINITY_DN97161_c2_g1,TRINITY_DN97667_c3_g2,TRINITY_DN98392_c2_g1	TRINITY_DN70911_c2_g1,TRINITY_DN73374_c1_g2,TRINITY_DN74996_c0_g1,TRINITY_DN77296_c1_g1,TRINITY_DN86425_c1_g1,TRINITY_DN86504_c0_g1,TRINITY_DN87707_c0_g1,TRINITY_DN97121_c1_g1,TRINITY_DN97161_c2_g1,TRINITY_DN97667_c3_g2,TRINITY_DN98392_c2_g1
GO:0007131	reciprocal meiotic recombination	biological process	4/609	224/93642	0.05951	1	TRINITY_DN85222_c1_g2,TRINITY_DN93699_c0_g1,TRINITY_DN97225_c1_g1,TRINITY_DN98191_c1_g2	TRINITY_DN85222_c1_g2,TRINITY_DN93699_c0_g1,TRINITY_DN97225_c1_g1,TRINITY_DN98191_c1_g2
GO:0035825	homologous recombination	biological process	4/609	224/93642	0.05951	1	TRINITY_DN85222_c1_g2,TRINITY_DN93699_c0_g1,TRINITY_DN97225_c1_g1,TRINITY_DN98191_c1_g2	TRINITY_DN85222_c1_g2,TRINITY_DN93699_c0_g1,TRINITY_DN97225_c1_g1,TRINITY_DN98191_c1_g2
GO:0045492	xylan biosynthetic process	biological process	2/609	61/93642	0.06009	1	TRINITY_DN91323_c1_g5,TRINITY_DN91736_c1_g1	TRINITY_DN91323_c1_g5,TRINITY_DN91736_c1_g1
GO:0007165	signal transduction	biological process	68/609	8656/93642	0.06081	1	TRINITY_DN66987_c0_g1,TRINITY_DN68434_c0_g1,TRINITY_DN68532_c1_g1,TRINITY_DN69399_c0_g2,TRINITY_DN70026_c1_g2,TRINITY_DN71143_c0_g1,TRINITY_DN72989_c0_g1,TRINITY_DN73324_c3_g1,TRINITY_DN74096_c1_g1,TRINITY_DN74568_c0_g3,TRINITY_DN74996_c0_g1,TRINITY_DN75228_c3_g1,TRINITY_DN75411_c0_g3,TRINITY_DN76045_c0_g1,TRINITY_DN76839_c0_g1,TRINITY_DN77433_c0_g1,TRINITY_DN77469_c0_g4,TRINITY_DN77929_c0_g2,TRI…	TRINITY_DN66987_c0_g1,TRINITY_DN68434_c0_g1,TRINITY_DN68532_c1_g1,TRINITY_DN69399_c0_g2,TRINITY_DN70026_c1_g2,TRINITY_DN71143_c0_g1,TRINITY_DN72989_c0_g1,TRINITY_DN73324_c3_g1,TRINITY_DN74096_c1_g1,TRINITY_DN74568_c0_g3,TRINITY_DN74996_c0_g1,TRINITY_DN75228_c3_g1,TRINITY_DN75411_c0_g3,TRINITY_DN76045_c0_g1,TRINITY_DN76839_c0_g1,TRINITY_DN77433_c0_g1,TRINITY_DN77469_c0_g4,TRINITY_DN77929_c0_g2,TRI…
GO:0045892	negative regulation of transcription, DNA-templated	biological process	15/609	1473/93642	0.06125	1	TRINITY_DN72819_c0_g1,TRINITY_DN74568_c0_g3,TRINITY_DN80370_c4_g5,TRINITY_DN83047_c1_g1,TRINITY_DN88959_c0_g1,TRINITY_DN89410_c0_g2,TRINITY_DN91545_c0_g4,TRINITY_DN91784_c1_g1,TRINITY_DN93339_c1_g1,TRINITY_DN93850_c1_g5,TRINITY_DN95125_c2_g1,TRINITY_DN95530_c0_g1,TRINITY_DN95775_c0_g1,TRINITY_DN96246_c1_g3,TRINITY_DN96581_c2_g1	TRINITY_DN72819_c0_g1,TRINITY_DN74568_c0_g3,TRINITY_DN80370_c4_g5,TRINITY_DN83047_c1_g1,TRINITY_DN88959_c0_g1,TRINITY_DN89410_c0_g2,TRINITY_DN91545_c0_g4,TRINITY_DN91784_c1_g1,TRINITY_DN93339_c1_g1,TRINITY_DN93850_c1_g5,TRINITY_DN95125_c2_g1,TRINITY_DN95530_c0_g1,TRINITY_DN95775_c0_g1,TRINITY_DN96246_c1_g3,TRINITY_DN96581_c2_g1
GO:0023052	signaling	biological process	69/609	8805/93642	0.06166	1	TRINITY_DN66987_c0_g1,TRINITY_DN68434_c0_g1,TRINITY_DN68532_c1_g1,TRINITY_DN69399_c0_g2,TRINITY_DN70026_c1_g2,TRINITY_DN71143_c0_g1,TRINITY_DN72989_c0_g1,TRINITY_DN73324_c3_g1,TRINITY_DN74096_c1_g1,TRINITY_DN74568_c0_g3,TRINITY_DN74996_c0_g1,TRINITY_DN75228_c3_g1,TRINITY_DN75411_c0_g3,TRINITY_DN76045_c0_g1,TRINITY_DN76839_c0_g1,TRINITY_DN77433_c0_g1,TRINITY_DN77469_c0_g4,TRINITY_DN77929_c0_g2,TRI…	TRINITY_DN66987_c0_g1,TRINITY_DN68434_c0_g1,TRINITY_DN68532_c1_g1,TRINITY_DN69399_c0_g2,TRINITY_DN70026_c1_g2,TRINITY_DN71143_c0_g1,TRINITY_DN72989_c0_g1,TRINITY_DN73324_c3_g1,TRINITY_DN74096_c1_g1,TRINITY_DN74568_c0_g3,TRINITY_DN74996_c0_g1,TRINITY_DN75228_c3_g1,TRINITY_DN75411_c0_g3,TRINITY_DN76045_c0_g1,TRINITY_DN76839_c0_g1,TRINITY_DN77433_c0_g1,TRINITY_DN77469_c0_g4,TRINITY_DN77929_c0_g2,TRI…
GO:0009817	defense response to fungus, incompatible interaction	biological process	3/609	138/93642	0.06172	1	TRINITY_DN84469_c1_g1,TRINITY_DN90512_c0_g2,TRINITY_DN95617_c1_g4	TRINITY_DN84469_c1_g1,TRINITY_DN90512_c0_g2,TRINITY_DN95617_c1_g4
GO:0008361	regulation of cell size	biological process	5/609	325/93642	0.06254	1	TRINITY_DN74096_c1_g1,TRINITY_DN77049_c0_g3,TRINITY_DN81058_c1_g3,TRINITY_DN86879_c0_g3,TRINITY_DN95710_c3_g2	TRINITY_DN74096_c1_g1,TRINITY_DN77049_c0_g3,TRINITY_DN81058_c1_g3,TRINITY_DN86879_c0_g3,TRINITY_DN95710_c3_g2
[truncated: 2,793 more rows]
