# Supplementary material for: De novo Transcriptome Sequencing Coupled With Co-expression Analysis Reveal the Transcriptional Regulation of Key Genes Involved in the Formation of Active Ingredients in Peucedanum praeruptorum Dunn Under Bolting Period
Source: Front Genet. 2021 Jun 14;12:683037. doi: 10.3389/fgene.2021.683037 (PMC8236723; doi:10.3389/fgene.2021.683037)
Supplement: Supplementary Table 4 — The SSR markers of unigenes. [file Data_Sheet_4.xls]

ID	SSR nr.	SSR type	SSR	size	start	end
TRINITY_DN81819_c1_g1	1	p1	(T)20	20	1	20
TRINITY_DN81819_c1_g2	1	c	(T)29gtcaatttggaaaccaacgatgcaattgctacagaaggc(T)23	91	2383	2473
TRINITY_DN81819_c1_g4	1	p1	(T)15	15	638	652
TRINITY_DN98918_c2_g2	1	p1	(T)36	36	1147	1182
TRINITY_DN91717_c1_g2	1	p1	(A)10	10	2592	2601
TRINITY_DN84369_c0_g4	1	p1	(A)10	10	206	215
TRINITY_DN84369_c0_g4	2	p2	(AC)8	16	522	537
TRINITY_DN84369_c0_g4	3	p1	(A)16	16	866	881
TRINITY_DN81835_c0_g1	1	p1	(A)10	10	338	347
TRINITY_DN98362_c5_g3	1	p1	(T)14	14	201	214
TRINITY_DN74577_c0_g4	1	p2	(AT)21	42	330	371
TRINITY_DN213942_c0_g1	1	p1	(A)10	10	19	28
TRINITY_DN213942_c0_g1	2	p1	(T)10	10	191	200
TRINITY_DN95382_c2_g4	1	p1	(T)15	15	1	15
TRINITY_DN94765_c0_g1	1	p1	(A)15	15	3459	3473
TRINITY_DN74600_c1_g1	1	p1	(A)10	10	42	51
TRINITY_DN22946_c0_g1	1	p1	(G)11	11	346	356
TRINITY_DN97166_c2_g1	1	p1	(A)23	23	3656	3678
TRINITY_DN86230_c0_g3	1	p2	(AC)7	14	719	732
TRINITY_DN86230_c0_g1	1	p1	(A)10	10	781	790
TRINITY_DN88943_c0_g1	1	p2	(GT)14	28	1	28
TRINITY_DN74739_c0_g2	1	p1	(T)10	10	160	169
TRINITY_DN74385_c0_g2	1	p3	(TAA)5	15	404	418
TRINITY_DN74385_c0_g3	1	p3	(TAA)6	18	51	68
TRINITY_DN92192_c0_g1	1	p2	(GA)6	12	254	265
TRINITY_DN92192_c0_g1	2	p2	(AG)10	20	373	392
TRINITY_DN92192_c0_g2	1	p2	(AG)6	12	884	895
TRINITY_DN90556_c0_g1	1	p1	(A)10	10	177	186
TRINITY_DN92192_c0_g8	1	p2	(GA)6	12	177	188
TRINITY_DN92192_c0_g9	1	c	(AG)6acatc(GA)6	29	526	554
TRINITY_DN85122_c0_g1	1	p2	(GT)9	18	157	174
TRINITY_DN94544_c2_g3	1	p1	(T)10	10	798	807
TRINITY_DN73768_c2_g1	1	p1	(A)14	14	236	249
TRINITY_DN70506_c0_g3	1	p2	(CA)10	20	289	308
TRINITY_DN70506_c0_g1	1	p2	(GA)6	12	564	575
TRINITY_DN82414_c2_g1	1	p1	(C)10	10	1015	1024
TRINITY_DN70799_c2_g1	1	p1	(T)12	12	275	286
TRINITY_DN81747_c0_g1	1	c	(GA)9ttgagggaagagagtggagagtggagagaaagagattgagacgggagagagagaagcgaagggagagagagacgcgatataattcggtc(GA)6	119	356	474
TRINITY_DN81747_c0_g2	1	p2	(GA)9	18	2287	2304
TRINITY_DN81747_c0_g3	1	p2	(AG)6	12	95	106
TRINITY_DN81747_c0_g6	1	p2	(AG)7	14	560	573
TRINITY_DN83748_c1_g2	1	p1	(A)11	11	276	286
TRINITY_DN88470_c1_g1	1	p2	(AC)8	16	430	445
TRINITY_DN73345_c0_g1	1	p2	(CT)6	12	20	31
TRINITY_DN79830_c0_g2	1	p2	(AT)9	18	287	304
TRINITY_DN89577_c0_g2	1	p1	(T)11	11	604	614
TRINITY_DN94724_c1_g1	1	p1	(C)14	14	1	14
TRINITY_DN94724_c1_g1	2	c	(TG)6ttgtggcgacgtggttgtggacagcggacagggataaacacagagaaggcggtaatagacaggggagatggggaagaaacaagggagaagacaggggtgt(TG)6t(TG)6	137	2228	2364
TRINITY_DN94724_c1_g2	1	p1	(A)10	10	11	20
TRINITY_DN88204_c3_g1	1	p2	(CT)8	16	204	219
TRINITY_DN96549_c1_g4	1	p1	(A)10	10	489	498
TRINITY_DN166598_c0_g1	1	p3	(CGG)6	18	79	96
TRINITY_DN95175_c2_g2	1	p2	(GA)21	42	198	239
TRINITY_DN69509_c2_g2	1	p2	(CA)7	14	163	176
TRINITY_DN74912_c1_g6	1	p4	(ACAA)6	24	162	185
TRINITY_DN32427_c0_g1	1	p2	(GT)8	16	90	105
TRINITY_DN91887_c0_g1	1	p3	(AGA)5	15	848	862
TRINITY_DN89442_c1_g2	1	p2	(GT)6	12	117	128
TRINITY_DN73841_c2_g2	1	p1	(A)18	18	250	267
TRINITY_DN73841_c2_g1	1	c	(AG)8tggagaggagagagataaaaagtgtagagagagaaaataaagaaaaagaaaaaaggggtggagaagaacataacattccaaattgaatcagc(A)25	133	1905	2037
TRINITY_DN77538_c3_g1	1	p1	(A)11	11	445	455
TRINITY_DN77538_c3_g2	1	p2	(TA)6	12	58	69
TRINITY_DN77538_c3_g5	1	p2	(TA)7	14	48	61
TRINITY_DN50842_c1_g1	1	p3	(CAA)6	18	143	160
TRINITY_DN96627_c3_g3	1	p1	(A)10	10	166	175
TRINITY_DN85210_c2_g3	1	p2	(TC)9	18	96	113
TRINITY_DN85210_c2_g2	1	p2	(CT)10	20	112	131
TRINITY_DN85210_c2_g7	1	c	(CT)9gattactactccagttacagtaccacagcagaagaaatggatgtaaccaaacaaacacgcattatttttctactgtaatctagtttgtcccaaatca(TC)11	137	265	401
TRINITY_DN85210_c2_g5	1	c	(CT)11cgttaatcag(TC)9	50	1	50
TRINITY_DN85210_c2_g5	2	p1	(A)12	12	331	342
TRINITY_DN75680_c0_g1	1	p1	(A)11	11	384	394
TRINITY_DN80840_c2_g1	1	p4	(TTTC)5	20	969	988
TRINITY_DN90643_c1_g7	1	p3	(ATC)5	15	190	204
TRINITY_DN71309_c3_g1	1	p3	(ACA)5	15	246	260
TRINITY_DN71309_c3_g1	2	p2	(AG)9	18	812	829
TRINITY_DN71309_c3_g2	1	p2	(GA)17	34	547	580
TRINITY_DN71309_c3_g3	1	p2	(GA)7	14	74	87
TRINITY_DN98693_c1_g1	1	p1	(A)16	16	63	78
TRINITY_DN74032_c0_g3	1	p1	(A)14	14	493	506
TRINITY_DN77909_c1_g1	1	p1	(T)10	10	466	475
TRINITY_DN73390_c0_g1	1	p2	(TC)12	24	56	79
TRINITY_DN87607_c2_g1	1	p2	(AT)6	12	3172	3183
TRINITY_DN90146_c0_g1	1	p1	(T)12	12	2545	2556
TRINITY_DN90146_c0_g1	2	p1	(T)10	10	3379	3388
TRINITY_DN116784_c0_g1	1	p1	(G)12	12	1476	1487
TRINITY_DN77012_c2_g3	1	p1	(A)10	10	514	523
TRINITY_DN81768_c0_g2	1	p1	(A)10	10	66	75
TRINITY_DN81473_c0_g4	1	p1	(T)10	10	37	46
TRINITY_DN77796_c1_g1	1	c	(TC)6tgttctccaaagcgctgta(TC)6	43	2824	2866
TRINITY_DN77796_c1_g2	1	p1	(T)11	11	1241	1251
TRINITY_DN77796_c1_g3	1	p3	(TCT)7	21	4076	4096
TRINITY_DN94604_c1_g1	1	p2	(AT)6	12	204	215
TRINITY_DN8675_c0_g1	1	p1	(A)13	13	410	422
TRINITY_DN79836_c2_g1	1	p1	(T)10	10	2599	2608
TRINITY_DN30353_c0_g1	1	p1	(A)16	16	103	118
TRINITY_DN159326_c0_g1	1	p1	(T)10	10	210	219
TRINITY_DN90424_c0_g3	1	p3	(AAT)6	18	34	51
TRINITY_DN85988_c0_g1	1	p1	(T)10	10	717	726
TRINITY_DN84790_c2_g3	1	p2	(TG)9	18	38	55
TRINITY_DN90937_c1_g2	1	p2	(TC)7	14	8	21
TRINITY_DN90937_c1_g2	2	p2	(TC)7	14	148	161
TRINITY_DN55714_c0_g1	1	p3	(GTA)5	15	985	999
TRINITY_DN79141_c0_g1	1	p2	(GA)12	24	1	24
TRINITY_DN84220_c3_g1	1	p2	(AC)10	20	63	82
TRINITY_DN39286_c0_g1	1	p3	(TGG)7	21	173	193
TRINITY_DN89206_c1_g1	1	p2	(TA)6	12	12	23
TRINITY_DN89943_c0_g5	1	p1	(T)12	12	408	419
TRINITY_DN70779_c1_g1	1	p1	(A)11	11	1430	1440
TRINITY_DN73980_c0_g1	1	p1	(A)10	10	47	56
TRINITY_DN73980_c0_g1	2	p3	(TTA)5	15	540	554
TRINITY_DN70632_c3_g1	1	p1	(A)10	10	2708	2717
TRINITY_DN84771_c2_g3	1	p2	(TG)12	24	572	595
TRINITY_DN92477_c1_g8	1	p1	(T)18	18	71	88
TRINITY_DN199289_c0_g1	1	p1	(T)10	10	228	237
TRINITY_DN98973_c2_g2	1	p1	(T)10	10	150	159
TRINITY_DN86520_c3_g1	1	p1	(T)15	15	223	237
TRINITY_DN96554_c0_g2	1	c	(A)10ttcaatataattggtactctatagaactcaacta(AT)7	58	1384	1441
TRINITY_DN72153_c0_g1	1	p3	(AGA)6	18	84	101
TRINITY_DN70320_c1_g2	1	p2	(AG)27	54	9	62
TRINITY_DN70320_c1_g1	1	p2	(AG)11	22	600	621
TRINITY_DN96930_c1_g1	1	p2	(GA)16	32	3740	3771
TRINITY_DN69183_c0_g12	1	p1	(T)19	19	282	300
TRINITY_DN75580_c0_g2	1	p1	(T)26	26	999	1024
TRINITY_DN85177_c4_g2	1	c	(AT)7gggaaaagagtatctaa(AT)6	43	9	51
TRINITY_DN79061_c2_g6	1	p2	(TC)6	12	427	438
TRINITY_DN77831_c5_g2	1	p1	(A)12	12	274	285
TRINITY_DN77831_c5_g1	1	p1	(A)12	12	47	58
TRINITY_DN96554_c0_g7	1	p1	(A)10	10	84	93
TRINITY_DN73261_c0_g1	1	p1	(T)12	12	496	507
TRINITY_DN78526_c1_g2	1	p1	(T)15	15	219	233
TRINITY_DN77748_c2_g2	1	p1	(A)10	10	125	134
TRINITY_DN69617_c3_g1	1	p4	(TGAT)6	24	123	146
TRINITY_DN93698_c0_g4	1	p1	(A)16	16	357	372
TRINITY_DN78675_c0_g1	1	p2	(GA)7	14	403	416
TRINITY_DN75370_c2_g1	1	p3	(AGC)5	15	1816	1830
TRINITY_DN78310_c0_g1	1	p1	(T)10	10	69	78
TRINITY_DN91123_c0_g1	1	p2	(GA)11	22	1936	1957
TRINITY_DN91123_c0_g3	1	p2	(GA)8	16	892	907
TRINITY_DN97050_c1_g1	1	p3	(TCT)11	33	72	104
TRINITY_DN86115_c0_g2	1	p1	(A)10	10	1042	1051
TRINITY_DN77637_c0_g2	1	p2	(TC)9	18	1840	1857
TRINITY_DN80619_c3_g1	1	p2	(GA)6	12	676	687
TRINITY_DN83174_c0_g2	1	p2	(TC)19	38	198	235
TRINITY_DN83174_c0_g2	2	p1	(A)12	12	588	599
TRINITY_DN76593_c2_g2	1	p3	(TTC)8	24	9	32
TRINITY_DN76593_c2_g2	2	p2	(CA)12	24	134	157
TRINITY_DN95255_c1_g5	1	p1	(A)11	11	193	203
TRINITY_DN92870_c0_g1	1	p1	(T)10	10	410	419
TRINITY_DN71861_c0_g2	1	p3	(CAC)6	18	156	173
TRINITY_DN90921_c1_g3	1	p3	(TCT)5	15	25	39
TRINITY_DN88404_c1_g1	1	p1	(T)10	10	77	86
TRINITY_DN72388_c0_g1	1	p1	(A)11	11	8	18
TRINITY_DN123740_c0_g1	1	p2	(CT)6	12	103	114
TRINITY_DN78038_c0_g1	1	c	(T)10actaatcggaatttggacatttcgattatgaaataataaaaagtgggtatttaggcactcacccataaattatttgcttcgcaaactagtactac(T)11	116	1	116
TRINITY_DN80851_c0_g1	1	p2	(AC)12	24	117	140
TRINITY_DN90981_c1_g1	1	p1	(T)11	11	806	816
TRINITY_DN90981_c1_g6	1	p2	(AT)6	12	533	544
TRINITY_DN71158_c0_g1	1	p2	(TA)6	12	63	74
TRINITY_DN95561_c1_g2	1	c	(TC)6ccc(CT)6	27	49	75
TRINITY_DN95561_c1_g3	1	p1	(A)19	19	134	152
TRINITY_DN95561_c1_g3	2	p2	(GA)6	12	1217	1228
TRINITY_DN83646_c0_g1	1	p1	(A)11	11	732	742
TRINITY_DN76483_c1_g3	1	c	(AC)6gctgttttgt(AC)8	38	76	113
TRINITY_DN80886_c3_g2	1	p1	(T)10	10	690	699
TRINITY_DN206362_c0_g1	1	p3	(GAA)6	18	455	472
TRINITY_DN205848_c0_g1	1	p1	(T)10	10	187	196
TRINITY_DN147978_c0_g1	1	p1	(G)12	12	1	12
TRINITY_DN63360_c0_g1	1	p2	(GA)6	12	55	66
TRINITY_DN78237_c0_g4	1	p1	(A)10	10	1142	1151
TRINITY_DN80621_c0_g4	1	p1	(A)10	10	115	124
TRINITY_DN57285_c0_g1	1	p1	(T)12	12	130	141
TRINITY_DN92485_c1_g1	1	p1	(T)25	25	1288	1312
TRINITY_DN93796_c0_g1	1	p1	(T)13	13	169	181
TRINITY_DN95075_c1_g1	1	p1	(A)10	10	385	394
TRINITY_DN79217_c1_g2	1	p1	(T)11	11	216	226
TRINITY_DN79217_c1_g2	2	p2	(TA)6	12	411	422
TRINITY_DN82911_c0_g1	1	p1	(A)11	11	1725	1735
TRINITY_DN79217_c1_g1	1	c	(AG)6gggatacgggaaagagagaagagagagtgaggtact(GA)8acggagagggatgat(AG)8	95	159	253
TRINITY_DN97382_c1_g1	1	p2	(TC)11	22	59	80
TRINITY_DN91976_c0_g1	1	p2	(AG)11	22	1	22
TRINITY_DN71412_c2_g2	1	p1	(A)12	12	46	57
TRINITY_DN71412_c2_g3	1	p3	(TCT)9	27	296	322
TRINITY_DN94454_c1_g1	1	p1	(T)10	10	422	431
TRINITY_DN92295_c1_g1	1	p1	(C)12	12	67	78
TRINITY_DN72375_c0_g5	1	p1	(A)57	57	1	57
TRINITY_DN72375_c0_g4	1	c	(T)13aaggtggggtgctaatttggttgcaaccacattcaactcttgcaaccacattcaac(T)10g(T)11	91	3	93
TRINITY_DN49410_c0_g1	1	p1	(T)10	10	122	131
TRINITY_DN72375_c0_g3	1	p1	(A)11	11	195	205
TRINITY_DN72375_c0_g2	1	c	(T)11agttgtggtgatattttggtggatttgggttgcaactaaatgcaacccagccgactttgacaa(T)11agttgtggtgatattttggtggatttgggttgcaactaaatgcaacccagccgactttgacaa(T)11	159	52	210
TRINITY_DN77830_c0_g1	1	p2	(AC)6	12	77	88
TRINITY_DN77830_c0_g1	2	p1	(A)10	10	2313	2322
TRINITY_DN77830_c0_g1	3	p1	(T)12	12	2858	2869
TRINITY_DN73328_c2_g1	1	p2	(CT)6	12	45	56
TRINITY_DN89577_c0_g3	1	p1	(T)10	10	2163	2172
TRINITY_DN93242_c3_g2	1	p2	(CT)7	14	108	121
TRINITY_DN93242_c3_g4	1	p2	(AT)8	16	132	147
TRINITY_DN73115_c2_g3	1	p1	(A)13	13	2	14
TRINITY_DN92941_c1_g1	1	p2	(TA)7	14	50	63
TRINITY_DN92941_c1_g1	2	c	(A)11gaaatga(T)10	28	222	249
TRINITY_DN90211_c0_g1	1	c	(A)10gttgcaacaaaatcagataatgaaacccagaaaaagagtaccggctagtgagaaagtgattcagaacttgaaatgaac(TGA)6	106	1147	1252
TRINITY_DN90540_c2_g1	1	p1	(T)11	11	153	163
TRINITY_DN90540_c2_g1	2	p2	(TA)6	12	738	749
TRINITY_DN90540_c2_g2	1	p1	(T)11	11	279	289
TRINITY_DN93133_c1_g2	1	p1	(A)11	11	111	121
TRINITY_DN94269_c0_g1	1	p1	(A)10	10	438	447
TRINITY_DN84781_c0_g1	1	p2	(CT)7	14	9	22
TRINITY_DN84781_c0_g2	1	p1	(A)10	10	333	342
TRINITY_DN84781_c0_g2	2	p2	(TG)6	12	765	776
TRINITY_DN84781_c0_g2	3	p2	(GT)6	12	922	933
TRINITY_DN84781_c0_g5	1	p3	(ATA)8	24	184	207
TRINITY_DN84781_c0_g4	1	c	(GT)6gggtaagaagtgtggtggtcgggtg(GT)6	49	241	289
TRINITY_DN72113_c1_g2	1	p2	(TA)6	12	1455	1466
TRINITY_DN65238_c0_g1	1	p1	(G)10	10	205	214
TRINITY_DN35113_c0_g1	1	p1	(T)10	10	80	89
TRINITY_DN70972_c0_g1	1	p1	(A)10	10	1953	1962
TRINITY_DN76077_c1_g2	1	p1	(T)10	10	660	669
TRINITY_DN76077_c1_g1	1	p2	(CT)21	42	1208	1249
TRINITY_DN73191_c0_g1	1	p1	(A)12	12	337	348
TRINITY_DN93618_c2_g4	1	p2	(GA)12	24	4	27
TRINITY_DN88611_c1_g1	1	p3	(TGG)5	15	2541	2555
TRINITY_DN84473_c2_g1	1	p2	(CT)8	16	1208	1223
TRINITY_DN96549_c1_g1	1	p1	(A)17	17	1750	1766
TRINITY_DN200058_c0_g1	1	p1	(T)13	13	191	203
TRINITY_DN79028_c1_g1	1	p3	(ATG)6	18	440	457
TRINITY_DN86408_c0_g1	1	p1	(A)14	14	9	22
TRINITY_DN53825_c1_g1	1	p3	(GCG)5	15	141	155
TRINITY_DN71960_c3_g1	1	c	(GT)6gatgtacgattctatgtgtattgtgtagtagtatggctgtgctctagctccccttccctg(T)14	86	138	223
TRINITY_DN71960_c3_g1	2	p2	(GT)7	14	439	452
TRINITY_DN118116_c0_g1	1	p3	(CAA)5	15	643	657
TRINITY_DN74245_c3_g1	1	p1	(T)11	11	197	207
TRINITY_DN74245_c3_g7	1	c	(TC)7c(CT)7	29	160	188
TRINITY_DN74245_c3_g4	1	c	(TC)6gca(TC)6	27	434	460
TRINITY_DN74245_c3_g5	1	p2	(TC)12	24	364	387
TRINITY_DN67828_c0_g1	1	p1	(A)16	16	714	729
TRINITY_DN92122_c3_g1	1	p1	(T)10	10	84	93
TRINITY_DN92122_c3_g2	1	p1	(T)10	10	222	231
TRINITY_DN67671_c0_g1	1	p1	(A)11	11	48	58
TRINITY_DN77138_c0_g1	1	p2	(CT)7	14	118	131
TRINITY_DN89530_c3_g1	1	p3	(GTG)7	21	5	25
TRINITY_DN176502_c0_g1	1	p1	(T)10	10	136	145
TRINITY_DN27357_c0_g2	1	p2	(AG)7	14	260	273
TRINITY_DN73290_c1_g3	1	p1	(T)12	12	1007	1018
TRINITY_DN122459_c0_g1	1	p1	(T)11	11	205	215
TRINITY_DN73384_c0_g2	1	p1	(A)16	16	62	77
TRINITY_DN73384_c0_g1	1	c	(CTT)5ctagttgcgccaccgcagcatgcgtcgtctttcttttggaagaggacgg(CTT)5	79	481	559
TRINITY_DN97610_c2_g1	1	p2	(TC)6	12	45	56
TRINITY_DN70444_c0_g2	1	p2	(AT)21	42	417	458
TRINITY_DN69344_c1_g7	1	p1	(T)22	22	471	492
TRINITY_DN69344_c1_g8	1	p1	(T)36	36	1	36
TRINITY_DN64106_c0_g1	1	p3	(TCT)5	15	165	179
TRINITY_DN73304_c0_g1	1	c	(AT)16(AC)6	44	89	132
TRINITY_DN91504_c1_g2	1	p1	(A)10	10	898	907
TRINITY_DN98641_c3_g1	1	c	(AC)6ataacactacccccgtccccctataataaaacaacacctactttcaattcaaaaacactccctactcacaca(GT)7tttatactagctcagagg(GA)20gg(GA)6	170	127	296
TRINITY_DN98641_c3_g2	1	c	(GA)7a(AG)11	37	399	435
TRINITY_DN91977_c0_g1	1	p1	(T)10	10	662	671
TRINITY_DN91977_c0_g1	2	p1	(T)10	10	1253	1262
TRINITY_DN72652_c0_g1	1	c	(TGA)5gatgaagcaatcgc(ACT)5	44	2103	2146
TRINITY_DN72652_c0_g2	1	p3	(GCT)5	15	1112	1126
TRINITY_DN83354_c1_g1	1	c	(A)11gaag(A)12	27	502	528
TRINITY_DN90336_c1_g1	1	p1	(T)14	14	64	77
TRINITY_DN95175_c2_g3	1	p1	(T)13	13	34	46
TRINITY_DN73327_c3_g1	1	p1	(A)10	10	533	542
TRINITY_DN42045_c0_g1	1	p1	(T)13	13	30	42
TRINITY_DN80666_c2_g1	1	p1	(T)28	28	417	444
TRINITY_DN87792_c0_g1	1	p1	(T)11	11	9	19
TRINITY_DN87792_c0_g1	2	p3	(GCA)6	18	2193	2210
TRINITY_DN81168_c0_g2	1	p1	(T)15	15	25	39
TRINITY_DN89467_c0_g1	1	p2	(GA)7	14	202	215
TRINITY_DN73408_c1_g2	1	p1	(T)18	18	276	293
TRINITY_DN75865_c0_g1	1	p2	(AG)12	24	211	234
TRINITY_DN77603_c1_g1	1	p1	(T)12	12	14	25
TRINITY_DN97091_c1_g2	1	p3	(AGA)6	18	2061	2078
TRINITY_DN97091_c1_g1	1	c	(AGA)6aggcaagcaaagg(GAA)5	46	488	533
TRINITY_DN90455_c1_g1	1	p1	(T)10	10	3105	3114
TRINITY_DN83690_c0_g2	1	p1	(A)11	11	951	961
TRINITY_DN83690_c0_g2	2	p1	(A)23	23	1437	1459
TRINITY_DN52402_c0_g1	1	p3	(TCT)6	18	338	355
TRINITY_DN84178_c2_g2	1	p2	(TG)6	12	4	15
TRINITY_DN97804_c3_g1	1	p1	(A)12	12	248	259
TRINITY_DN95875_c1_g4	1	p2	(GT)6	12	363	374
TRINITY_DN95875_c1_g2	1	p3	(TTG)6	18	161	178
TRINITY_DN95875_c1_g9	1	p3	(GTT)5	15	45	59
TRINITY_DN81782_c1_g2	1	c	(TC)10gttacttttgggcttttctttctttactcttgtgccctactctctctca(TC)16	101	1	101
TRINITY_DN81782_c1_g1	1	p2	(GA)7	14	463	476
TRINITY_DN86495_c0_g2	1	p2	(TC)8	16	1805	1820
TRINITY_DN86495_c0_g1	1	p1	(A)10	10	554	563
TRINITY_DN74548_c2_g1	1	p3	(GGT)5	15	1590	1604
TRINITY_DN95957_c1_g1	1	p1	(A)33	33	369	401
TRINITY_DN93280_c3_g2	1	p1	(A)17	17	807	823
TRINITY_DN66522_c0_g2	1	p1	(A)10	10	439	448
TRINITY_DN170186_c0_g1	1	p3	(TGC)5	15	495	509
TRINITY_DN90176_c0_g2	1	p1	(T)10	10	1292	1301
TRINITY_DN95696_c1_g2	1	p2	(CA)9	18	62	79
TRINITY_DN95696_c1_g2	2	p1	(A)11	11	407	417
TRINITY_DN79192_c2_g1	1	p1	(A)10	10	1457	1466
TRINITY_DN73171_c0_g1	1	p2	(CT)7	14	296	309
TRINITY_DN61649_c0_g1	1	c	(A)10gagtctaatt(GAA)8	44	109	152
TRINITY_DN90709_c1_g8	1	p2	(AC)6	12	593	604
TRINITY_DN90709_c1_g2	1	p2	(CA)9	18	375	392
TRINITY_DN74249_c1_g2	1	p1	(A)10	10	603	612
TRINITY_DN74249_c1_g3	1	p1	(T)11	11	489	499
TRINITY_DN74249_c1_g3	2	p2	(GA)19	38	1291	1328
TRINITY_DN74249_c1_g6	1	p1	(A)10	10	191	200
TRINITY_DN34319_c0_g1	1	p1	(A)10	10	696	705
TRINITY_DN96731_c0_g1	1	c	(T)10ctattaa(T)12	29	38	66
TRINITY_DN89307_c1_g1	1	p1	(T)12	12	202	213
TRINITY_DN79119_c0_g1	1	p1	(T)11	11	13	23
TRINITY_DN79119_c0_g1	2	p1	(T)11	11	1662	1672
TRINITY_DN75516_c2_g3	1	p2	(CT)9	18	177	194
TRINITY_DN75516_c2_g2	1	p2	(CT)8	16	144	159
TRINITY_DN86310_c0_g5	1	p2	(TC)10	20	188	207
TRINITY_DN86741_c1_g5	1	c	(GT)9ttgtgtgtgctttggattagaaaaatgaagaggcgagggcggagaaatagtattataaaagaaactcagattttgtttgtaagaaac(GA)6	117	57	173
TRINITY_DN85547_c3_g1	1	p2	(GA)7	14	259	272
TRINITY_DN89431_c1_g2	1	p1	(T)11	11	311	321
TRINITY_DN89431_c1_g1	1	p1	(A)10	10	242	251
TRINITY_DN78366_c3_g1	1	p1	(T)19	19	962	980
TRINITY_DN67372_c0_g1	1	c	(TGAAT)8tggcgatatgtgc(A)11	64	1312	1375
TRINITY_DN79127_c1_g7	1	p3	(CTT)5	15	320	334
TRINITY_DN73786_c0_g6	1	p1	(T)14	14	141	154
TRINITY_DN81334_c0_g2	1	p1	(A)13	13	10	22
TRINITY_DN73632_c0_g1	1	p1	(A)11	11	3242	3252
TRINITY_DN73632_c0_g1	2	p1	(T)17	17	3986	4002
TRINITY_DN188606_c0_g1	1	p1	(A)13	13	112	124
TRINITY_DN95105_c1_g1	1	p2	(TC)6	12	183	194
TRINITY_DN95105_c1_g1	2	p1	(T)20	20	5411	5430
TRINITY_DN97755_c1_g1	1	p2	(CT)11	22	300	321
TRINITY_DN97755_c1_g1	2	p1	(A)30	30	2235	2264
TRINITY_DN74636_c0_g1	1	p1	(A)10	10	468	477
TRINITY_DN93096_c0_g6	1	p1	(T)10	10	888	897
TRINITY_DN71054_c0_g4	1	p1	(T)10	10	276	285
TRINITY_DN71054_c0_g3	1	p3	(CTG)6	18	745	762
TRINITY_DN94824_c1_g1	1	p1	(A)12	12	118	129
TRINITY_DN83207_c0_g10	1	p2	(TG)6	12	745	756
TRINITY_DN98282_c0_g3	1	p1	(A)39	39	1	39
TRINITY_DN98282_c0_g3	2	p3	(CCT)6	18	199	216
TRINITY_DN67139_c0_g1	1	p1	(T)12	12	151	162
TRINITY_DN90275_c0_g4	1	p3	(ATA)6	18	62	79
TRINITY_DN72451_c2_g3	1	p2	(GT)6	12	381	392
TRINITY_DN82855_c3_g1	1	p1	(A)10	10	1776	1785
TRINITY_DN79979_c1_g1	1	p2	(AG)7	14	1101	1114
TRINITY_DN98895_c4_g1	1	p2	(TA)16	32	260	291
TRINITY_DN92419_c1_g3	1	c	(A)11taaaa(AAT)13	55	255	309
TRINITY_DN88770_c0_g1	1	p1	(A)27	27	1976	2002
TRINITY_DN69631_c2_g1	1	p3	(TTA)7	21	115	135
TRINITY_DN86329_c0_g1	1	p3	(TTC)5	15	173	187
TRINITY_DN78399_c2_g1	1	p1	(A)13	13	591	603
TRINITY_DN90338_c2_g4	1	p1	(T)12	12	576	587
TRINITY_DN77981_c3_g1	1	c	(A)10tcaaaaaaatcaa(AAT)7	44	134	177
TRINITY_DN92614_c1_g5	1	p1	(T)14	14	673	686
TRINITY_DN92650_c3_g1	1	p1	(T)16	16	48	63
TRINITY_DN69176_c2_g1	1	p1	(G)11	11	1	11
TRINITY_DN82716_c3_g1	1	p1	(A)13	13	17	29
TRINITY_DN96171_c0_g1	1	p3	(TGC)6	18	282	299
TRINITY_DN173716_c0_g1	1	p3	(TGT)5	15	1	15
TRINITY_DN91636_c0_g1	1	p1	(T)13	13	623	635
TRINITY_DN194722_c0_g1	1	p1	(T)12	12	80	91
TRINITY_DN77003_c0_g1	1	p2	(AT)9	18	207	224
TRINITY_DN84038_c2_g5	1	p2	(GT)6	12	905	916
TRINITY_DN82020_c0_g3	1	p1	(T)10	10	1102	1111
TRINITY_DN82693_c2_g7	1	p1	(A)10	10	239	248
TRINITY_DN82693_c2_g2	1	p1	(T)10	10	805	814
TRINITY_DN75471_c0_g1	1	p1	(A)10	10	35	44
TRINITY_DN87427_c2_g1	1	p1	(A)11	11	704	714
TRINITY_DN98254_c4_g2	1	p1	(A)16	16	1	16
TRINITY_DN94747_c1_g1	1	p2	(TA)7	14	207	220
TRINITY_DN78013_c0_g4	1	p1	(T)10	10	27	36
TRINITY_DN76874_c0_g1	1	p1	(T)11	11	52	62
TRINITY_DN46487_c0_g1	1	p1	(C)12	12	434	445
TRINITY_DN87553_c4_g1	1	p1	(G)10	10	42	51
TRINITY_DN78708_c1_g1	1	p1	(T)19	19	646	664
TRINITY_DN19219_c0_g1	1	p1	(A)13	13	156	168
TRINITY_DN72161_c0_g1	1	p1	(A)19	19	459	477
TRINITY_DN80581_c0_g1	1	p1	(T)10	10	195	204
TRINITY_DN83078_c3_g2	1	p2	(TA)9	18	253	270
TRINITY_DN83078_c3_g1	1	p1	(A)14	14	2391	2404
TRINITY_DN92285_c0_g1	1	p3	(GCA)5	15	143	157
TRINITY_DN46719_c0_g1	1	p1	(T)10	10	271	280
TRINITY_DN81812_c4_g1	1	p1	(T)10	10	821	830
TRINITY_DN92420_c1_g2	1	p2	(GA)11	22	1	22
TRINITY_DN105530_c0_g1	1	p1	(T)13	13	9	21
TRINITY_DN94991_c1_g2	1	p2	(GT)8	16	5387	5402
TRINITY_DN68641_c3_g1	1	c	(A)11tgagagtag(A)10tagggagtgtagtagtattgaaaaaatctgtg(A)13gaagaaaaaag(A)10tctgtgag(A)10	114	25	138
TRINITY_DN77414_c0_g1	1	p2	(TA)6	12	109	120
TRINITY_DN76364_c0_g1	1	p2	(GA)6	12	431	442
TRINITY_DN80074_c1_g1	1	p1	(A)14	14	668	681
TRINITY_DN65123_c0_g1	1	p1	(T)13	13	623	635
TRINITY_DN88607_c0_g1	1	p2	(TC)8	16	106	121
TRINITY_DN82553_c2_g2	1	p1	(T)12	12	189	200
TRINITY_DN94890_c1_g2	1	p2	(GA)10	20	752	771
TRINITY_DN91623_c0_g1	1	p1	(T)10	10	64	73
TRINITY_DN51518_c0_g1	1	p1	(A)10	10	141	150
TRINITY_DN97049_c0_g1	1	p1	(T)10	10	141	150
TRINITY_DN85116_c1_g2	1	p1	(T)20	20	934	953
TRINITY_DN79913_c0_g2	1	p2	(CA)7	14	48	61
TRINITY_DN93245_c1_g3	1	p1	(T)10	10	184	193
TRINITY_DN94483_c1_g1	1	p1	(T)10	10	120	129
TRINITY_DN98500_c2_g3	1	p1	(T)10	10	98	107
TRINITY_DN90677_c0_g1	1	p2	(CT)7	14	108	121
TRINITY_DN90677_c0_g1	2	p2	(AC)6	12	255	266
TRINITY_DN22615_c0_g1	1	p1	(T)12	12	126	137
TRINITY_DN77704_c3_g1	1	p2	(CA)8	16	378	393
TRINITY_DN73662_c2_g2	1	c	(GA)9ggagagaac(GA)7	41	1482	1522
TRINITY_DN73662_c2_g5	1	c	(GA)6gc(GA)12acgggagagggagagagac(AG)7	71	140	210
TRINITY_DN73662_c2_g4	1	p2	(GA)9	18	309	326
TRINITY_DN68279_c0_g1	1	p1	(A)11	11	200	210
TRINITY_DN45093_c0_g1	1	p1	(T)12	12	159	170
TRINITY_DN75249_c2_g3	1	p1	(T)10	10	329	338
TRINITY_DN75249_c2_g1	1	p1	(T)15	15	512	526
TRINITY_DN71974_c1_g4	1	p2	(AG)6	12	388	399
TRINITY_DN71974_c1_g5	1	p2	(GA)6	12	350	361
TRINITY_DN85815_c3_g2	1	p2	(GA)10	20	7	26
TRINITY_DN77978_c1_g1	1	c	(TG)6tctga(GT)6	29	312	340
TRINITY_DN75279_c0_g1	1	p2	(TC)18	36	64	99
TRINITY_DN72443_c0_g1	1	p1	(A)14	14	273	286
TRINITY_DN75279_c0_g4	1	p2	(AG)6	12	998	1009
TRINITY_DN72443_c0_g3	1	p1	(A)14	14	44	57
TRINITY_DN98341_c0_g1	1	p1	(A)14	14	619	632
TRINITY_DN98061_c1_g1	1	p1	(A)15	15	442	456
TRINITY_DN78705_c2_g1	1	p2	(CT)6	12	33	44
TRINITY_DN73911_c0_g1	1	p3	(GAT)5	15	745	759
TRINITY_DN98539_c1_g1	1	p2	(TG)18	36	30	65
TRINITY_DN85069_c1_g2	1	p1	(A)38	38	731	768
TRINITY_DN92056_c0_g2	1	p1	(T)11	11	398	408
TRINITY_DN60926_c0_g1	1	p2	(AT)6	12	13	24
TRINITY_DN150667_c0_g1	1	p1	(T)11	11	199	209
TRINITY_DN71642_c0_g2	1	p1	(A)13	13	18	30
TRINITY_DN86322_c3_g5	1	p1	(T)10	10	318	327
TRINITY_DN86322_c3_g4	1	p2	(AC)6	12	49	60
TRINITY_DN92739_c0_g5	1	p1	(A)11	11	423	433
TRINITY_DN91993_c1_g2	1	p1	(T)11	11	64	74
TRINITY_DN80560_c4_g6	1	p1	(T)11	11	272	282
TRINITY_DN82378_c2_g5	1	p2	(GT)8	16	280	295
TRINITY_DN82378_c2_g1	1	c	(GT)6ggttataggtatatgttgggttcgatgatcaaacctct(C)10	60	288	347
TRINITY_DN82378_c2_g2	1	p1	(A)12	12	758	769
TRINITY_DN682_c0_g1	1	p1	(A)11	11	230	240
TRINITY_DN29802_c0_g1	1	p3	(GTT)5	15	70	84
TRINITY_DN88215_c2_g1	1	p3	(CAT)7	21	1697	1717
TRINITY_DN95557_c2_g5	1	p1	(T)10	10	136	145
TRINITY_DN27435_c0_g1	1	p1	(A)10	10	370	379
TRINITY_DN83211_c1_g3	1	p3	(ATA)6	18	1183	1200
TRINITY_DN83211_c1_g2	1	p1	(T)10	10	822	831
TRINITY_DN85124_c3_g3	1	p1	(T)10	10	160	169
TRINITY_DN85124_c3_g1	1	p1	(T)11	11	197	207
TRINITY_DN85124_c3_g5	1	p1	(A)12	12	376	387
TRINITY_DN94731_c2_g3	1	p2	(AT)10	20	11	30
TRINITY_DN73300_c0_g5	1	p3	(ATT)5	15	1086	1100
TRINITY_DN73300_c0_g2	1	p1	(T)11	11	358	368
TRINITY_DN73300_c0_g2	2	p1	(G)15	15	730	744
TRINITY_DN98720_c0_g1	1	p2	(GT)6	12	1801	1812
TRINITY_DN98720_c0_g1	2	p1	(T)19	19	2320	2338
TRINITY_DN94011_c0_g3	1	p1	(G)16	16	507	522
TRINITY_DN96618_c0_g1	1	p1	(A)13	13	11	23
TRINITY_DN84722_c2_g5	1	p2	(GA)6	12	441	452
TRINITY_DN45522_c0_g1	1	p3	(GCG)6	18	1	18
TRINITY_DN88003_c0_g1	1	p1	(T)15	15	457	471
TRINITY_DN80162_c1_g1	1	p1	(A)10	10	1222	1231
TRINITY_DN80162_c1_g1	2	p1	(A)10	10	2662	2671
TRINITY_DN57674_c0_g1	1	p1	(T)10	10	108	117
TRINITY_DN70183_c1_g1	1	p1	(A)13	13	147	159
TRINITY_DN96075_c0_g1	1	p2	(TA)6	12	230	241
TRINITY_DN91804_c0_g1	1	p1	(T)10	10	4485	4494
TRINITY_DN90443_c0_g2	1	p2	(TC)9	18	64	81
TRINITY_DN76600_c1_g2	1	p2	(CA)7	14	201	214
TRINITY_DN211274_c0_g1	1	p1	(T)10	10	86	95
TRINITY_DN65084_c0_g1	1	p1	(A)15	15	85	99
TRINITY_DN74336_c3_g3	1	p2	(GA)8	16	1001	1016
TRINITY_DN84368_c0_g2	1	p2	(AG)7	14	382	395
TRINITY_DN84368_c0_g3	1	c	(AG)6cacgattgagagggagagggagagagagagtaatcggaatagatcgagagagaagaagac(AG)9	90	39	128
TRINITY_DN84368_c0_g4	1	c	(GA)7t(AG)14	43	123	165
TRINITY_DN85811_c1_g5	1	p3	(GCA)5	15	1927	1941
TRINITY_DN90710_c0_g4	1	c	(TG)7taagagg(GA)11ggtgcttgttctaagtgttataacttgtgttcatagtttagtttccagttctg(GA)6gttctttgttttaagcgttaaatttactgtatagtttacaattttggagagg(GA)6	172	126	297
TRINITY_DN73930_c1_g2	1	p1	(T)10	10	223	232
TRINITY_DN90710_c0_g3	1	c	(TA)6atgtcatacttatgaaagagagattaagagagagg(GA)10ctgaaatagtaagggagatcagagagggagagagagg(GA)9	122	457	578
TRINITY_DN73930_c1_g1	1	p2	(GT)9	18	685	702
TRINITY_DN134435_c0_g1	1	p1	(T)11	11	477	487
TRINITY_DN80116_c4_g2	1	p2	(AT)13	26	84	109
TRINITY_DN80116_c4_g5	1	p2	(AT)6	12	509	520
TRINITY_DN89113_c0_g1	1	p2	(AC)7	14	33	46
TRINITY_DN134933_c0_g1	1	p1	(T)11	11	256	266
TRINITY_DN87570_c1_g2	1	p1	(A)12	12	141	152
TRINITY_DN87570_c1_g2	2	p1	(A)11	11	642	652
TRINITY_DN87570_c1_g2	3	p1	(T)10	10	1578	1587
TRINITY_DN91572_c0_g1	1	c	(CA)6taatcgcgcaccatatatatatac(AT)6	48	404	451
TRINITY_DN91572_c0_g1	2	p2	(GA)9	18	610	627
TRINITY_DN71286_c1_g2	1	p1	(T)11	11	230	240
TRINITY_DN96933_c4_g1	1	p2	(TA)8	16	72	87
TRINITY_DN96933_c4_g1	2	c	(GA)10ttcatctgtaaatcagatcag(T)10	51	292	342
TRINITY_DN96933_c4_g1	3	p1	(A)15	15	637	651
TRINITY_DN73226_c5_g1	1	p1	(A)18	18	147	164
TRINITY_DN73226_c5_g1	2	p1	(A)15	15	1199	1213
TRINITY_DN81877_c0_g2	1	p2	(TA)7	14	107	120
TRINITY_DN32236_c0_g1	1	p2	(TG)10	20	105	124
TRINITY_DN81877_c0_g1	1	p2	(TA)7	14	26	39
TRINITY_DN77852_c2_g1	1	p1	(A)11	11	66	76
TRINITY_DN73440_c0_g3	1	p1	(A)15	15	60	74
TRINITY_DN92529_c1_g2	1	p1	(A)11	11	278	288
TRINITY_DN88712_c3_g1	1	p2	(AG)8	16	9	24
TRINITY_DN83911_c0_g5	1	p2	(TG)6	12	220	231
TRINITY_DN98403_c1_g1	1	p2	(AG)7	14	48	61
TRINITY_DN174206_c0_g1	1	p3	(TGC)6	18	150	167
TRINITY_DN69207_c1_g1	1	p1	(A)10	10	233	242
TRINITY_DN69207_c1_g1	2	p1	(A)10	10	575	584
TRINITY_DN138358_c0_g1	1	p1	(T)13	13	444	456
TRINITY_DN92368_c0_g3	1	p1	(T)14	14	615	628
TRINITY_DN97105_c0_g2	1	p2	(AG)6	12	581	592
TRINITY_DN89887_c0_g3	1	p1	(A)10	10	161	170
TRINITY_DN89887_c0_g2	1	p2	(GA)11	22	269	290
TRINITY_DN146280_c0_g1	1	p1	(A)10	10	98	107
TRINITY_DN69654_c2_g1	1	p1	(A)14	14	997	1010
TRINITY_DN69654_c2_g1	2	p1	(A)10	10	1559	1568
TRINITY_DN69654_c2_g2	1	p2	(TC)9	18	1	18
TRINITY_DN72781_c3_g1	1	p1	(T)12	12	312	323
TRINITY_DN86893_c1_g1	1	p1	(T)10	10	59	68
TRINITY_DN76000_c0_g1	1	p1	(A)11	11	928	938
TRINITY_DN81739_c1_g3	1	p1	(A)10	10	937	946
TRINITY_DN86431_c1_g1	1	p1	(T)12	12	972	983
TRINITY_DN9974_c0_g1	1	p1	(T)10	10	11	20
TRINITY_DN71584_c1_g2	1	p1	(T)11	11	590	600
TRINITY_DN179122_c0_g1	1	p1	(A)10	10	250	259
TRINITY_DN71653_c3_g2	1	p1	(T)10	10	504	513
TRINITY_DN83500_c0_g2	1	p1	(T)11	11	419	429
TRINITY_DN89285_c0_g1	1	p2	(TG)7	14	3832	3845
TRINITY_DN77209_c2_g1	1	p2	(CA)14	28	1883	1910
TRINITY_DN98948_c2_g2	1	p1	(A)10	10	219	228
TRINITY_DN98948_c2_g2	2	p2	(TA)6	12	831	842
TRINITY_DN75613_c0_g2	1	p1	(T)12	12	283	294
TRINITY_DN59368_c0_g1	1	p3	(CCA)5	15	254	268
TRINITY_DN73199_c3_g1	1	p1	(G)10	10	453	462
TRINITY_DN72580_c0_g1	1	p1	(T)13	13	425	437
TRINITY_DN85794_c0_g1	1	p1	(A)21	21	244	264
TRINITY_DN78114_c1_g1	1	p1	(T)28	28	469	496
TRINITY_DN78114_c1_g2	1	p1	(T)21	21	289	309
TRINITY_DN78695_c0_g4	1	p2	(TA)6	12	157	168
TRINITY_DN88678_c0_g1	1	p2	(AC)8	16	351	366
TRINITY_DN94551_c1_g2	1	p1	(T)11	11	141	151
TRINITY_DN94551_c1_g2	2	c	(GA)12ttagagatataaggagatatt(AG)10	65	732	796
TRINITY_DN94551_c1_g2	3	p1	(T)13	13	3033	3045
TRINITY_DN94551_c1_g2	4	p3	(AGC)5	15	3315	3329
TRINITY_DN73134_c4_g4	1	p3	(CAC)7	21	16	36
TRINITY_DN73134_c4_g2	1	p4	(CCAT)5	20	85	104
TRINITY_DN95414_c0_g1	1	p1	(T)10	10	554	563
TRINITY_DN87757_c0_g1	1	p1	(A)12	12	808	819
TRINITY_DN68132_c2_g4	1	p3	(ATT)6	18	18	35
TRINITY_DN96677_c0_g2	1	c	(CAT)6(CTT)6	36	1260	1295
TRINITY_DN83751_c1_g1	1	p3	(TGC)6	18	757	774
TRINITY_DN83751_c1_g1	2	p3	(CAA)5	15	3000	3014
TRINITY_DN86259_c0_g2	1	p2	(AC)9	18	179	196
TRINITY_DN81270_c1_g1	1	p1	(T)10	10	116	125
TRINITY_DN77116_c1_g1	1	p2	(GT)6	12	290	301
TRINITY_DN77116_c1_g1	2	p2	(GA)9	18	515	532
TRINITY_DN143081_c0_g1	1	p3	(GTC)5	15	604	618
TRINITY_DN85475_c1_g2	1	p2	(GT)6	12	277	288
TRINITY_DN38173_c0_g1	1	p2	(GA)8	16	159	174
TRINITY_DN79160_c1_g1	1	p2	(AG)6	12	841	852
TRINITY_DN73258_c0_g1	1	p1	(T)11	11	455	465
TRINITY_DN96883_c0_g2	1	p2	(AT)6	12	198	209
TRINITY_DN87570_c0_g1	1	p1	(A)12	12	36	47
TRINITY_DN85240_c0_g2	1	p1	(T)13	13	582	594
TRINITY_DN85240_c0_g1	1	p3	(CTC)5	15	241	255
TRINITY_DN85240_c0_g1	2	p2	(CT)14	28	1019	1046
TRINITY_DN60503_c0_g1	1	p1	(A)10	10	84	93
TRINITY_DN60503_c0_g1	2	p1	(T)10	10	297	306
TRINITY_DN94410_c1_g2	1	p2	(GA)9	18	1	18
TRINITY_DN94410_c1_g2	2	p1	(T)13	13	3146	3158
TRINITY_DN56074_c0_g1	1	p1	(T)10	10	151	160
TRINITY_DN56074_c0_g2	1	p3	(CCT)5	15	624	638
TRINITY_DN87479_c1_g2	1	p1	(T)15	15	1093	1107
TRINITY_DN92828_c0_g2	1	p1	(A)10	10	202	211
TRINITY_DN92524_c0_g1	1	p1	(T)14	14	467	480
TRINITY_DN92524_c0_g1	2	p1	(T)12	12	3982	3993
TRINITY_DN89852_c1_g6	1	p1	(A)17	17	10	26
TRINITY_DN89852_c1_g6	2	c*	(AAAT)5(AT)17*	52	221	272
TRINITY_DN88590_c1_g1	1	p2	(CA)6	12	429	440
TRINITY_DN88590_c1_g1	2	p1	(A)11	11	728	738
TRINITY_DN75789_c3_g2	1	p2	(CA)8	16	93	108
TRINITY_DN48812_c0_g1	1	p1	(T)12	12	1	12
TRINITY_DN83138_c2_g2	1	c	(TC)7atttgcaccttcttcctctcctccatcttcctccattcgttcaccaccgtcaccaccgtctcatttttctggtatctcgcctgcatacaa(AC)6	116	227	342
TRINITY_DN87900_c1_g3	1	p1	(T)13	13	741	753
TRINITY_DN65584_c0_g1	1	p2	(TA)7	14	88	101
TRINITY_DN89784_c0_g5	1	p2	(GA)6	12	334	345
TRINITY_DN92446_c0_g4	1	p1	(A)10	10	114	123
TRINITY_DN85796_c1_g11	1	p2	(TC)7	14	192	205
TRINITY_DN97703_c3_g4	1	c	(CT)8cctcttcctca(TC)9cctgttcttcaagctcttcatgaaagaataaatgctttgagttgggaatctgctcttaaggtcccaactcccaactctctctcctcttcctca(TC)9	156	107	262
TRINITY_DN68738_c0_g3	1	p1	(G)13	13	294	306
TRINITY_DN86752_c0_g3	1	p2	(TA)8	16	657	672
TRINITY_DN88945_c1_g4	1	p1	(T)20	20	1	20
TRINITY_DN88945_c1_g2	1	p1	(T)14	14	2196	2209
TRINITY_DN76783_c0_g1	1	p1	(A)13	13	1506	1518
TRINITY_DN90424_c0_g1	1	p1	(T)10	10	694	703
TRINITY_DN95619_c1_g1	1	p1	(T)28	28	4	31
TRINITY_DN95619_c1_g1	2	p1	(T)16	16	1481	1496
TRINITY_DN99009_c5_g1	1	p1	(T)11	11	97	107
TRINITY_DN98814_c0_g1	1	p2	(AT)7	14	475	488
TRINITY_DN92028_c2_g1	1	p1	(A)10	10	511	520
TRINITY_DN92028_c2_g2	1	p1	(T)10	10	124	133
TRINITY_DN72947_c0_g1	1	p1	(T)10	10	69	78
TRINITY_DN69415_c0_g1	1	p1	(T)13	13	454	466
TRINITY_DN88386_c0_g1	1	p3	(GCT)6	18	60	77
TRINITY_DN78958_c0_g1	1	p2	(AT)6	12	747	758
TRINITY_DN74147_c0_g3	1	p1	(A)10	10	541	550
TRINITY_DN74147_c0_g3	2	p1	(A)14	14	838	851
TRINITY_DN78827_c0_g1	1	p2	(AG)6	12	363	374
TRINITY_DN92117_c0_g1	1	p2	(CA)6	12	203	214
TRINITY_DN87012_c0_g4	1	c	(AG)13g(GA)7gggagagagtataggtgatgactttttagggagagtgtgtattatagagtgtttttgagagagggagagggagggg(GA)16	149	1	149
TRINITY_DN76727_c0_g1	1	p1	(T)18	18	1808	1825
TRINITY_DN87356_c3_g3	1	p1	(A)10	10	945	954
TRINITY_DN87356_c3_g3	2	p3	(ATA)5	15	1183	1197
TRINITY_DN87356_c3_g2	1	p2	(GA)19	38	21	58
TRINITY_DN95382_c2_g3	1	p1	(A)10	10	743	752
TRINITY_DN76441_c0_g1	1	p1	(A)10	10	29	38
TRINITY_DN95382_c2_g1	1	c	(TA)9(TG)11	40	674	713
TRINITY_DN86979_c2_g14	1	p2	(GT)9	18	285	302
TRINITY_DN86979_c2_g15	1	p2	(TA)8	16	76	91
TRINITY_DN86979_c2_g10	1	p2	(AG)7	14	238	251
TRINITY_DN76838_c0_g1	1	p1	(A)12	12	202	213
TRINITY_DN76838_c0_g1	2	p1	(A)10	10	912	921
TRINITY_DN97867_c2_g2	1	p1	(A)13	13	95	107
TRINITY_DN97867_c2_g3	1	p1	(A)11	11	522	532
TRINITY_DN69939_c0_g2	1	p3	(GAA)5	15	40	54
TRINITY_DN95213_c1_g1	1	p1	(A)13	13	2456	2468
TRINITY_DN96012_c1_g3	1	p1	(A)22	22	1	22
TRINITY_DN96012_c1_g3	2	p1	(A)12	12	529	540
TRINITY_DN93501_c0_g1	1	p3	(ATT)5	15	584	598
TRINITY_DN92479_c1_g1	1	p2	(GA)11	22	4708	4729
TRINITY_DN85901_c1_g1	1	p2	(CA)6	12	716	727
TRINITY_DN85901_c1_g1	2	p2	(GA)6	12	1059	1070
TRINITY_DN67211_c0_g3	1	p1	(T)11	11	391	401
TRINITY_DN67211_c0_g3	2	p1	(T)24	24	1178	1201
TRINITY_DN94766_c0_g6	1	p3	(ATA)5	15	914	928
TRINITY_DN94766_c0_g6	2	c	(TG)8(AG)7gggg(GA)9	52	1100	1151
TRINITY_DN94766_c0_g1	1	c	(TG)8(AG)7gggg(GA)9	52	1143	1194
TRINITY_DN86232_c0_g1	1	p2	(AG)11	22	185	206
TRINITY_DN72163_c2_g1	1	p1	(A)17	17	870	886
TRINITY_DN95075_c0_g1	1	p2	(TA)6	12	407	418
TRINITY_DN95075_c0_g2	1	p4	(AAAC)5	20	143	162
TRINITY_DN89314_c0_g1	1	p1	(A)10	10	749	758
TRINITY_DN93494_c2_g1	1	p2	(TA)6	12	561	572
TRINITY_DN85914_c0_g1	1	p2	(TA)6	12	80	91
TRINITY_DN78368_c0_g1	1	p1	(A)11	11	668	678
TRINITY_DN85901_c2_g2	1	p2	(AC)7	14	64	77
TRINITY_DN84683_c2_g3	1	p1	(T)13	13	618	630
TRINITY_DN78731_c0_g1	1	p2	(GT)15	30	1074	1103
TRINITY_DN69391_c0_g1	1	p2	(GA)6	12	262	273
TRINITY_DN95591_c0_g7	1	p2	(GA)6	12	564	575
TRINITY_DN80419_c0_g1	1	p1	(T)11	11	347	357
TRINITY_DN75650_c1_g1	1	p2	(TC)9	18	292	309
TRINITY_DN75650_c1_g1	2	p1	(T)11	11	868	878
TRINITY_DN71498_c0_g1	1	p1	(T)11	11	9	19
TRINITY_DN71498_c0_g1	2	p2	(GA)7	14	524	537
TRINITY_DN98962_c2_g2	1	p1	(A)10	10	423	432
TRINITY_DN81128_c2_g1	1	p1	(A)11	11	280	290
TRINITY_DN59646_c0_g1	1	p1	(A)10	10	46	55
TRINITY_DN86907_c1_g1	1	p1	(T)16	16	492	507
TRINITY_DN98940_c2_g1	1	p2	(AC)8	16	107	122
TRINITY_DN98245_c1_g3	1	p1	(T)23	23	1145	1167
TRINITY_DN73777_c0_g3	1	p1	(A)11	11	346	356
TRINITY_DN67670_c0_g1	1	p1	(A)13	13	847	859
TRINITY_DN69390_c0_g4	1	p1	(G)12	12	599	610
TRINITY_DN69390_c0_g5	1	p1	(A)12	12	201	212
TRINITY_DN98570_c3_g2	1	p2	(GA)20	40	1	40
TRINITY_DN93181_c1_g1	1	p1	(T)10	10	134	143
TRINITY_DN69775_c3_g1	1	p2	(AG)16	32	719	750
TRINITY_DN113465_c0_g1	1	p2	(TA)6	12	276	287
TRINITY_DN71008_c0_g1	1	p1	(A)20	20	319	338
TRINITY_DN81111_c2_g4	1	p1	(T)11	11	574	584
TRINITY_DN69347_c2_g1	1	p2	(AT)6	12	260	271
TRINITY_DN119422_c0_g1	1	p3	(GCT)7	21	198	218
TRINITY_DN83875_c1_g1	1	p1	(A)11	11	44	54
TRINITY_DN70779_c1_g3	1	p1	(A)39	39	36	74
TRINITY_DN214749_c0_g1	1	p1	(A)10	10	44	53
TRINITY_DN98132_c0_g3	1	p2	(CT)24	48	1066	1113
TRINITY_DN79508_c0_g3	1	p1	(A)12	12	1476	1487
TRINITY_DN83210_c2_g1	1	p1	(T)12	12	298	309
TRINITY_DN83210_c2_g1	2	p2	(GT)6	12	493	504
TRINITY_DN83210_c2_g1	3	p2	(AG)7	14	641	654
TRINITY_DN94887_c2_g2	1	p1	(T)23	23	1814	1836
TRINITY_DN83210_c2_g3	1	p2	(GT)6	12	484	495
TRINITY_DN83210_c2_g5	1	p1	(G)12	12	227	238
TRINITY_DN88759_c3_g1	1	p2	(AT)6	12	206	217
TRINITY_DN85982_c0_g1	1	p2	(GA)6	12	2220	2231
TRINITY_DN62738_c0_g1	1	p1	(T)13	13	1036	1048
TRINITY_DN83035_c1_g4	1	p1	(A)11	11	935	945
TRINITY_DN83035_c1_g2	1	p2	(GA)22	44	2369	2412
TRINITY_DN92634_c2_g5	1	p2	(CT)9	18	183	200
TRINITY_DN92634_c2_g5	2	p2	(TA)7	14	555	568
TRINITY_DN71148_c0_g1	1	p2	(TA)8	16	87	102
TRINITY_DN75910_c2_g6	1	p1	(A)11	11	995	1005
TRINITY_DN75910_c2_g3	1	p1	(T)11	11	87	97
TRINITY_DN69988_c0_g3	1	p2	(AG)8	16	1387	1402
TRINITY_DN72537_c1_g4	1	p1	(A)18	18	78	95
TRINITY_DN101909_c0_g1	1	p1	(T)12	12	148	159
TRINITY_DN83878_c1_g2	1	p2	(TG)6	12	107	118
TRINITY_DN83878_c1_g3	1	p2	(GT)8	16	249	264
TRINITY_DN83878_c1_g4	1	p2	(TC)6	12	14	25
TRINITY_DN83878_c1_g4	2	p2	(TG)6	12	173	184
TRINITY_DN83878_c1_g5	1	p2	(TC)6	12	20	31
TRINITY_DN83878_c1_g7	1	p3	(GCT)6	18	272	289
TRINITY_DN83483_c0_g1	1	c	(GA)6ggagagaaaatct(AG)6	37	9	45
TRINITY_DN83483_c0_g1	2	p3	(ATC)5	15	366	380
TRINITY_DN83653_c2_g3	1	p1	(T)11	11	538	548
TRINITY_DN82959_c0_g1	1	p1	(T)11	11	653	663
TRINITY_DN92068_c1_g1	1	p2	(AC)10	20	44	63
TRINITY_DN85922_c2_g1	1	p1	(A)23	23	187	209
TRINITY_DN86223_c1_g3	1	p1	(A)18	18	10	27
TRINITY_DN86223_c1_g3	2	p1	(T)10	10	175	184
TRINITY_DN89669_c0_g1	1	p1	(A)11	11	641	651
TRINITY_DN80332_c2_g1	1	p1	(A)14	14	1993	2006
TRINITY_DN93082_c5_g2	1	p2	(AC)7	14	1025	1038
TRINITY_DN93082_c5_g1	1	p2	(GA)6	12	210	221
TRINITY_DN89646_c1_g1	1	p3	(TCT)7	21	920	940
TRINITY_DN89646_c1_g1	2	p1	(A)10	10	2299	2308
TRINITY_DN97845_c1_g6	1	p3	(AAG)5	15	608	622
TRINITY_DN92819_c0_g1	1	p2	(GA)8	16	199	214
TRINITY_DN92819_c0_g1	2	p1	(T)10	10	389	398
TRINITY_DN90399_c2_g1	1	p1	(T)10	10	70	79
TRINITY_DN88669_c0_g2	1	p1	(T)13	13	2973	2985
TRINITY_DN88669_c0_g1	1	p1	(A)15	15	122	136
TRINITY_DN74180_c1_g1	1	c	(TC)6ttg(TC)7	29	1856	1884
TRINITY_DN68457_c0_g1	1	p1	(A)35	35	413	447
TRINITY_DN97141_c3_g2	1	p1	(T)25	25	342	366
TRINITY_DN139664_c0_g1	1	p2	(GT)6	12	254	265
TRINITY_DN92233_c0_g3	1	p2	(TG)6	12	286	297
TRINITY_DN82847_c1_g1	1	p1	(T)10	10	316	325
TRINITY_DN78172_c0_g1	1	p1	(A)10	10	129	138
TRINITY_DN65826_c1_g3	1	p4	(TCCA)5	20	118	137
TRINITY_DN94546_c1_g1	1	p1	(A)10	10	451	460
TRINITY_DN94546_c1_g1	2	p1	(T)20	20	599	618
TRINITY_DN92278_c0_g1	1	p1	(A)11	11	447	457
TRINITY_DN92278_c0_g1	2	p2	(AT)20	40	926	965
TRINITY_DN72451_c1_g1	1	p1	(A)11	11	2066	2076
TRINITY_DN98757_c2_g4	1	p2	(AT)7	14	237	250
TRINITY_DN65532_c0_g2	1	p2	(AT)6	12	783	794
TRINITY_DN80920_c2_g2	1	p1	(T)11	11	424	434
TRINITY_DN77633_c0_g1	1	p1	(A)13	13	313	325
TRINITY_DN97913_c1_g3	1	p1	(T)14	14	275	288
TRINITY_DN70228_c1_g1	1	c	(TTC)5cacatagttggtccctttcctctaaaattttggtgttgggtgtctaaaaagcaaccaattatattttctttgatgtcgacatctccttgttcaaag(T)11	122	45	166
TRINITY_DN97164_c1_g2	1	p1	(A)10	10	91	100
TRINITY_DN97164_c1_g2	2	p2	(TA)7	14	562	575
TRINITY_DN85182_c2_g3	1	p2	(AT)7	14	344	357
TRINITY_DN85182_c2_g3	2	p2	(GA)7	14	850	863
TRINITY_DN85182_c2_g2	1	p2	(GA)7	14	108	121
TRINITY_DN85182_c2_g2	2	p2	(AG)11	22	285	306
TRINITY_DN71531_c3_g1	1	p1	(T)12	12	1	12
TRINITY_DN160934_c0_g1	1	p4	(TTTA)5	20	22	41
TRINITY_DN210811_c0_g1	1	p2	(AG)6	12	316	327
TRINITY_DN72169_c1_g1	1	p3	(TAG)5	15	2582	2596
TRINITY_DN88934_c1_g3	1	p2	(AG)23	46	24	69
TRINITY_DN74150_c0_g1	1	p2	(AG)7	14	197	210
TRINITY_DN98152_c3_g1	1	p2	(AG)9	18	84	101
TRINITY_DN98152_c3_g1	2	p2	(TA)7	14	1011	1024
TRINITY_DN90944_c1_g2	1	p1	(A)10	10	374	383
TRINITY_DN90944_c1_g2	2	p1	(A)11	11	649	659
TRINITY_DN97184_c1_g1	1	p1	(T)15	15	2170	2184
TRINITY_DN90348_c0_g1	1	p1	(T)13	13	3746	3758
TRINITY_DN55559_c0_g1	1	p2	(TA)6	12	41	52
TRINITY_DN80237_c0_g1	1	p1	(T)10	10	975	984
TRINITY_DN79046_c0_g1	1	p2	(TA)8	16	951	966
TRINITY_DN79046_c0_g2	1	p1	(T)11	11	39	49
TRINITY_DN85428_c1_g1	1	p1	(T)20	20	393	412
TRINITY_DN98745_c0_g1	1	p1	(T)10	10	109	118
TRINITY_DN97855_c3_g1	1	p2	(TC)11	22	38	59
TRINITY_DN83071_c0_g1	1	p1	(A)23	23	11	33
TRINITY_DN83071_c0_g1	2	p1	(T)14	14	383	396
TRINITY_DN83071_c0_g1	3	p1	(A)10	10	823	832
TRINITY_DN91769_c1_g2	1	p1	(A)19	19	381	399
TRINITY_DN72079_c0_g1	1	p2	(AT)11	22	2	23
TRINITY_DN87312_c1_g1	1	p1	(T)11	11	48	58
TRINITY_DN56088_c0_g1	1	c	(A)10gagggaagcttctgagctctttaac(A)10	45	269	313
TRINITY_DN71605_c1_g1	1	p1	(A)35	35	180	214
TRINITY_DN83202_c0_g4	1	p3	(TAC)5	15	222	236
TRINITY_DN91351_c1_g1	1	p1	(T)11	11	191	201
TRINITY_DN95493_c0_g1	1	p2	(AG)7	14	345	358
TRINITY_DN88467_c1_g2	1	p1	(A)10	10	378	387
TRINITY_DN152818_c0_g1	1	p1	(A)12	12	1	12
TRINITY_DN80684_c2_g1	1	p1	(A)12	12	6	17
TRINITY_DN80684_c2_g1	2	p2	(AT)7	14	153	166
TRINITY_DN80684_c2_g1	3	p2	(TC)16	32	666	697
TRINITY_DN88362_c1_g5	1	p1	(A)12	12	1	12
TRINITY_DN72860_c0_g2	1	p1	(T)14	14	321	334
TRINITY_DN72860_c0_g3	1	p1	(T)15	15	35	49
TRINITY_DN72860_c0_g4	1	p3	(TCT)7	21	71	91
TRINITY_DN70351_c0_g1	1	p1	(A)13	13	296	308
TRINITY_DN95892_c1_g1	1	p1	(T)11	11	220	230
TRINITY_DN84990_c0_g1	1	c	(T)10cttgctttt(A)11	30	710	739
TRINITY_DN84990_c0_g2	1	p2	(TG)9	18	78	95
TRINITY_DN99031_c5_g3	1	p2	(GA)9	18	534	551
TRINITY_DN95969_c1_g3	1	p2	(GA)8	16	405	420
TRINITY_DN91971_c2_g1	1	p1	(T)11	11	304	314
TRINITY_DN93375_c0_g3	1	p1	(A)12	12	177	188
TRINITY_DN90315_c1_g1	1	p1	(A)13	13	426	438
TRINITY_DN80324_c0_g1	1	p1	(A)15	15	794	808
TRINITY_DN73944_c3_g1	1	p1	(G)12	12	1	12
TRINITY_DN73944_c3_g1	2	p3	(CGG)5	15	591	605
TRINITY_DN73944_c3_g3	1	p2	(TA)7	14	1	14
TRINITY_DN73944_c3_g2	1	p2	(GT)8	16	933	948
TRINITY_DN73944_c3_g5	1	p1	(G)17	17	887	903
TRINITY_DN94931_c0_g1	1	p2	(TC)20	40	41	80
TRINITY_DN73733_c1_g3	1	p1	(A)16	16	1714	1729
TRINITY_DN73733_c1_g1	1	p1	(A)16	16	323	338
TRINITY_DN85026_c0_g5	1	p1	(T)14	14	82	95
TRINITY_DN85026_c0_g5	2	p1	(A)10	10	442	451
TRINITY_DN85026_c0_g5	3	p1	(T)10	10	875	884
TRINITY_DN85026_c0_g1	1	p2	(TA)15	30	2621	2650
TRINITY_DN77767_c0_g3	1	p1	(G)12	12	1	12
TRINITY_DN77767_c0_g3	2	p2	(AC)9	18	599	616
TRINITY_DN77767_c0_g1	1	p2	(CA)8	16	660	675
TRINITY_DN92064_c3_g1	1	p2	(AC)19	38	6	43
TRINITY_DN98646_c5_g1	1	p1	(T)41	41	1568	1608
TRINITY_DN74558_c2_g1	1	p2	(AT)6	12	920	931
TRINITY_DN74558_c2_g2	1	p2	(AT)6	12	644	655
TRINITY_DN69277_c1_g2	1	p1	(T)10	10	211	220
TRINITY_DN69277_c1_g2	2	p1	(T)11	11	2140	2150
TRINITY_DN135413_c0_g1	1	p2	(AT)7	14	218	231
TRINITY_DN53640_c0_g1	1	p1	(T)13	13	282	294
TRINITY_DN76110_c5_g1	1	p1	(T)12	12	10	21
TRINITY_DN189105_c0_g1	1	p1	(T)10	10	69	78
TRINITY_DN72966_c0_g2	1	p3	(AGT)6	18	1321	1338
TRINITY_DN85182_c3_g3	1	p1	(A)15	15	131	145
TRINITY_DN96821_c1_g1	1	p2	(GA)16	32	2733	2764
TRINITY_DN98792_c4_g1	1	p3	(CAT)5	15	1368	1382
TRINITY_DN97112_c3_g1	1	p1	(A)14	14	147	160
TRINITY_DN81046_c0_g1	1	p1	(A)12	12	214	225
TRINITY_DN77074_c0_g1	1	p2	(GT)10	20	1596	1615
TRINITY_DN78174_c0_g1	1	p1	(T)14	14	283	296
TRINITY_DN78174_c0_g3	1	p1	(T)11	11	111	121
TRINITY_DN48018_c0_g2	1	c	(T)14(A)12	26	676	701
TRINITY_DN71408_c4_g3	1	p2	(CT)6	12	358	369
TRINITY_DN71408_c4_g2	1	c	(CT)6cgactggatctctctcgctctcatctctta(TC)6	54	47	100
TRINITY_DN71408_c4_g1	1	p2	(TC)7	14	90	103
TRINITY_DN71408_c4_g7	1	p2	(CT)9	18	42	59
TRINITY_DN71408_c4_g6	1	p3	(CAC)5	15	114	128
TRINITY_DN71408_c4_g5	1	p2	(CT)7	14	174	187
TRINITY_DN71408_c4_g8	1	c	(CT)6cgatctcgactgaatctctctcacctccaccacgaccacctgctctagaatgctctctctcataattgaacccccgaaa(CT)6	103	27	129
TRINITY_DN76570_c0_g7	1	p2	(TG)7	14	374	387
TRINITY_DN76570_c0_g2	1	p2	(TA)7	14	72	85
TRINITY_DN76570_c0_g3	1	p1	(A)12	12	821	832
TRINITY_DN76570_c0_g1	1	p1	(A)13	13	125	137
TRINITY_DN29746_c0_g1	1	p1	(T)12	12	128	139
TRINITY_DN98149_c1_g2	1	c	(GA)6gcacgcgagagagatagacagagagagcgagtgcgagagagaaagagagagagacccaggcgatagagaa(AG)11	104	771	874
TRINITY_DN69266_c0_g1	1	p2	(AC)7	14	76	89
TRINITY_DN95612_c0_g4	1	p1	(A)10	10	725	734
TRINITY_DN95612_c0_g3	1	p2	(GA)15	30	1401	1430
TRINITY_DN95612_c0_g1	1	p1	(T)10	10	362	371
TRINITY_DN71547_c1_g2	1	c	(T)11aatttttgtgtttttactttctttgcttaactgcg(T)13attatttctattcgtcaa(T)10cta(T)10	100	10	109
TRINITY_DN89297_c0_g1	1	p2	(AT)6	12	1930	1941
TRINITY_DN86587_c0_g1	1	p1	(T)10	10	3215	3224
TRINITY_DN98096_c1_g1	1	p1	(A)13	13	974	986
TRINITY_DN92334_c1_g4	1	p1	(T)10	10	484	493
TRINITY_DN74622_c0_g3	1	p1	(T)10	10	76	85
TRINITY_DN85599_c1_g1	1	c	(GA)6agcc(GA)8ggccgaaaggccgagg(GA)7	62	22	83
TRINITY_DN73412_c1_g2	1	p2	(TA)6	12	519	530
TRINITY_DN80631_c0_g1	1	c	(AG)6tac(AG)7aattcacacagagaaagtacaa(AG)11aattcagagagagagtacaa(AG)6	105	2401	2505
TRINITY_DN98951_c4_g1	1	c	(A)11t(A)12	24	62	85
TRINITY_DN159194_c0_g1	1	p1	(T)10	10	132	141
TRINITY_DN71075_c0_g1	1	p1	(A)12	12	389	400
TRINITY_DN98000_c1_g1	1	p2	(TC)6	12	67	78
TRINITY_DN98000_c1_g5	1	p2	(TC)9	18	42	59
TRINITY_DN15332_c0_g1	1	p1	(T)10	10	155	164
TRINITY_DN88664_c6_g6	1	p2	(GA)6	12	216	227
TRINITY_DN97782_c1_g1	1	p3	(CAT)5	15	186	200
TRINITY_DN97782_c1_g1	2	p1	(T)31	31	2682	2712
TRINITY_DN88664_c6_g3	1	p2	(GA)6	12	1	12
TRINITY_DN88664_c6_g3	2	c	(GA)6gg(GA)9	32	176	207
TRINITY_DN96346_c0_g4	1	p1	(A)15	15	47	61
TRINITY_DN87816_c1_g2	1	p2	(AT)19	38	13	50
TRINITY_DN87816_c1_g2	2	p1	(A)15	15	336	350
TRINITY_DN97553_c1_g1	1	p2	(GT)6	12	17	28
TRINITY_DN96946_c0_g1	1	c	(T)13aaaaaaaatgatgacgtggtagcgg(T)14	52	94	145
TRINITY_DN98791_c0_g5	1	p1	(A)10	10	73	82
TRINITY_DN94919_c0_g2	1	p2	(TC)7	14	756	769
TRINITY_DN87209_c0_g2	1	p1	(A)13	13	181	193
TRINITY_DN74890_c0_g1	1	p2	(TA)12	24	26	49
TRINITY_DN74890_c0_g9	1	p4	(ACAT)5	20	66	85
TRINITY_DN74890_c0_g9	2	p1	(T)10	10	288	297
TRINITY_DN76877_c0_g1	1	p1	(T)11	11	2556	2566
TRINITY_DN94134_c0_g2	1	p1	(T)10	10	110	119
TRINITY_DN94134_c0_g2	2	p1	(A)11	11	757	767
TRINITY_DN94134_c0_g3	1	p2	(AG)6	12	720	731
TRINITY_DN94391_c0_g4	1	p2	(AT)6	12	801	812
TRINITY_DN12656_c0_g1	1	p1	(T)13	13	441	453
TRINITY_DN76713_c0_g2	1	c	(CT)6cactcgaccctctctctcacccgta(TC)6	49	8	56
TRINITY_DN201674_c0_g1	1	p3	(TTA)5	15	266	280
TRINITY_DN86312_c3_g3	1	p1	(T)10	10	153	162
TRINITY_DN164771_c0_g1	1	p1	(A)12	12	212	223
TRINITY_DN75442_c0_g1	1	c	(CT)7acacaaattcaaatttgattaagtctgaggaaattggggattgtttctcactcaattatttgcctctctctctg(TC)7	102	52	153
TRINITY_DN75442_c0_g3	1	p2	(CT)6	12	65	76
TRINITY_DN77730_c0_g1	1	p6	(GGTAGT)11	66	10	75
TRINITY_DN88966_c1_g2	1	p2	(GT)6	12	247	258
TRINITY_DN83710_c0_g3	1	p1	(T)11	11	95	105
TRINITY_DN206700_c0_g1	1	p1	(T)10	10	114	123
TRINITY_DN84978_c1_g2	1	p1	(T)11	11	817	827
TRINITY_DN78433_c0_g3	1	p2	(TA)6	12	532	543
TRINITY_DN86064_c0_g5	1	p1	(A)12	12	471	482
TRINITY_DN89162_c0_g1	1	p2	(TG)11	22	374	395
TRINITY_DN87580_c0_g2	1	p1	(T)12	12	643	654
TRINITY_DN35878_c0_g1	1	p3	(TGG)5	15	183	197
TRINITY_DN90596_c0_g1	1	c	(CT)11(AT)10	42	1647	1688
TRINITY_DN96276_c0_g1	1	p1	(T)10	10	61	70
TRINITY_DN16669_c0_g1	1	p1	(T)11	11	101	111
TRINITY_DN78657_c0_g1	1	p3	(CAT)5	15	3031	3045
TRINITY_DN77664_c5_g1	1	p1	(A)10	10	374	383
TRINITY_DN77664_c5_g1	2	p2	(GT)6	12	502	513
TRINITY_DN79790_c0_g3	1	p2	(AT)16	32	950	981
TRINITY_DN79790_c0_g2	1	p2	(AT)7	14	193	206
TRINITY_DN157053_c0_g1	1	p1	(A)10	10	159	168
TRINITY_DN97215_c2_g4	1	p2	(TC)9	18	607	624
TRINITY_DN97470_c1_g1	1	p2	(AT)10	20	230	249
TRINITY_DN73483_c2_g1	1	p1	(T)13	13	84	96
TRINITY_DN73483_c2_g2	1	p1	(T)15	15	716	730
TRINITY_DN24191_c0_g1	1	p3	(CAG)11	33	130	162
TRINITY_DN74261_c0_g1	1	p1	(A)11	11	537	547
TRINITY_DN74261_c0_g2	1	p1	(A)10	10	1122	1131
TRINITY_DN84278_c0_g1	1	p2	(TA)6	12	619	630
TRINITY_DN84278_c0_g1	2	p1	(T)11	11	2332	2342
TRINITY_DN84278_c0_g3	1	p1	(T)10	10	603	612
TRINITY_DN81437_c1_g4	1	p1	(T)16	16	320	335
TRINITY_DN65420_c0_g1	1	p2	(GA)6	12	146	157
TRINITY_DN70793_c1_g1	1	p1	(T)10	10	184	193
TRINITY_DN70793_c1_g1	2	p1	(T)10	10	321	330
TRINITY_DN85881_c2_g1	1	p1	(A)11	11	260	270
TRINITY_DN97215_c2_g2	1	p2	(CT)23	46	104	149
TRINITY_DN208374_c0_g1	1	p1	(A)15	15	334	348
TRINITY_DN71071_c2_g1	1	p2	(TA)9	18	26	43
TRINITY_DN102175_c0_g1	1	p1	(A)10	10	119	128
TRINITY_DN31928_c0_g1	1	p2	(TC)8	16	194	209
TRINITY_DN31928_c0_g1	2	p1	(A)10	10	317	326
TRINITY_DN98879_c3_g2	1	p3	(GCT)5	15	109	123
TRINITY_DN92065_c0_g1	1	p2	(CA)12	24	117	140
TRINITY_DN92065_c0_g1	2	p1	(T)10	10	638	647
TRINITY_DN89437_c2_g4	1	p2	(CA)6	12	536	547
TRINITY_DN89437_c2_g4	2	c	(GA)6c(AG)6	25	1416	1440
TRINITY_DN68964_c0_g2	1	p1	(A)10	10	399	408
TRINITY_DN96475_c4_g2	1	c	(A)11gaaaaaatattaaaaaagtaccggtaatactgttata(CT)6	60	245	304
TRINITY_DN77995_c1_g1	1	p1	(A)11	11	498	508
TRINITY_DN74725_c1_g4	1	p2	(TA)10	20	308	327
TRINITY_DN79713_c0_g1	1	p1	(T)15	15	267	281
TRINITY_DN79713_c0_g3	1	p1	(T)12	12	296	307
TRINITY_DN152153_c0_g1	1	p2	(TG)21	42	190	231
TRINITY_DN92124_c0_g1	1	c	(T)11cattacttgacacgtattttaagattgttataaaatatagtttcacaacttatttttaa(T)11gaataaaaatagaaacattaaatttttattcagaag(A)10	127	531	657
TRINITY_DN74333_c1_g2	1	p3	(TTA)10	30	15	44
TRINITY_DN74333_c1_g2	2	p3	(CTG)6	18	263	280
TRINITY_DN74333_c1_g3	1	p2	(AT)6	12	77	88
TRINITY_DN74333_c1_g1	1	p3	(CTG)6	18	207	224
TRINITY_DN74668_c0_g1	1	p2	(CT)17	34	1	34
TRINITY_DN74668_c0_g1	2	p1	(A)27	27	2382	2408
TRINITY_DN92846_c0_g3	1	p2	(TC)6	12	397	408
TRINITY_DN95683_c1_g1	1	p1	(A)17	17	63	79
TRINITY_DN95683_c1_g1	2	p1	(A)10	10	282	291
TRINITY_DN74668_c0_g4	1	p2	(TA)6	12	190	201
TRINITY_DN94082_c2_g1	1	c	(AT)9caactagt(A)10	36	18	53
TRINITY_DN94082_c2_g1	2	p2	(AC)6	12	249	260
TRINITY_DN94082_c2_g1	3	p3	(GAT)8	24	1834	1857
TRINITY_DN61223_c0_g1	1	p1	(A)10	10	400	409
TRINITY_DN198183_c0_g1	1	p1	(A)10	10	36	45
TRINITY_DN68613_c4_g7	1	p1	(A)11	11	189	199
TRINITY_DN80157_c0_g1	1	p1	(A)10	10	1579	1588
TRINITY_DN95171_c2_g1	1	p1	(A)10	10	852	861
TRINITY_DN87007_c1_g2	1	p2	(TG)8	16	574	589
TRINITY_DN87007_c1_g3	1	p3	(AGT)6	18	248	265
TRINITY_DN89558_c0_g1	1	p1	(A)16	16	1185	1200
TRINITY_DN96294_c3_g1	1	p2	(CA)8	16	154	169
TRINITY_DN79971_c3_g3	1	p1	(A)11	11	230	240
TRINITY_DN74061_c0_g1	1	p1	(C)13	13	432	444
TRINITY_DN74061_c0_g1	2	p1	(T)14	14	1449	1462
TRINITY_DN150136_c0_g1	1	p2	(AG)8	16	252	267
TRINITY_DN73046_c0_g1	1	p1	(T)13	13	609	621
TRINITY_DN125111_c0_g1	1	p1	(A)13	13	477	489
TRINITY_DN95136_c1_g1	1	p1	(C)10	10	3135	3144
TRINITY_DN95136_c1_g3	1	p2	(GT)7	14	162	175
TRINITY_DN83398_c0_g1	1	p5	(GATTG)5	25	264	288
TRINITY_DN89588_c1_g4	1	p1	(T)19	19	571	589
TRINITY_DN71334_c0_g2	1	p1	(A)10	10	424	433
TRINITY_DN77852_c1_g1	1	p2	(TC)12	24	53	76
TRINITY_DN77852_c1_g1	2	p2	(TG)6	12	1977	1988
TRINITY_DN77852_c1_g1	3	p2	(TG)6	12	2231	2242
TRINITY_DN86042_c1_g1	1	p5	(CTATA)5	25	48	72
TRINITY_DN92508_c2_g2	1	p2	(AG)6	12	1590	1601
TRINITY_DN84984_c0_g2	1	p2	(AG)20	40	21	60
TRINITY_DN84984_c0_g3	1	c	(AG)8gagagagagggagagagacaaaatagataggaaagagtcatggtatctgttttaattgtttatcttaacatacatag(CCA)5	108	42	149
TRINITY_DN84984_c0_g1	1	c	(AG)8aa(AG)10	38	51	88
TRINITY_DN60381_c0_g2	1	p1	(A)12	12	8	19
TRINITY_DN97411_c0_g3	1	p3	(AAT)22	66	1	66
TRINITY_DN74825_c0_g1	1	p3	(TTA)6	18	178	195
TRINITY_DN88304_c0_g1	1	p1	(G)10	10	1	10
TRINITY_DN94673_c0_g1	1	c	(T)10aaatacagaatatgtttcttaacactgtaatcaattgcggggttgtttaa(T)18	78	476	553
TRINITY_DN23484_c0_g1	1	p3	(TGT)8	24	538	561
TRINITY_DN91951_c0_g3	1	p1	(A)29	29	1	29
TRINITY_DN73539_c2_g1	1	p1	(T)10	10	896	905
TRINITY_DN60148_c0_g1	1	p1	(T)11	11	427	437
TRINITY_DN76018_c0_g3	1	p2	(CT)6	12	711	722
TRINITY_DN88254_c1_g2	1	p1	(T)10	10	9	18
TRINITY_DN88254_c1_g4	1	p2	(CT)11	22	437	458
TRINITY_DN96888_c1_g1	1	p1	(A)13	13	11	23
TRINITY_DN75324_c1_g2	1	p2	(GA)9	18	1192	1209
TRINITY_DN70467_c2_g2	1	p1	(T)10	10	168	177
TRINITY_DN81327_c1_g2	1	p1	(T)11	11	116	126
TRINITY_DN96290_c1_g2	1	p3	(GGA)7	21	811	831
TRINITY_DN79038_c2_g1	1	p1	(T)18	18	920	937
TRINITY_DN79038_c2_g1	2	p1	(A)22	22	2088	2109
TRINITY_DN79038_c2_g1	3	p1	(T)10	10	2508	2517
TRINITY_DN70631_c0_g1	1	c	(CT)6atg(TA)13	41	270	310
TRINITY_DN75517_c3_g2	1	p1	(A)17	17	86	102
TRINITY_DN75517_c3_g2	2	p1	(A)13	13	295	307
TRINITY_DN97863_c0_g2	1	p1	(A)10	10	96	105
TRINITY_DN92920_c0_g2	1	p3	(GTA)5	15	25	39
TRINITY_DN92920_c0_g2	2	p1	(A)10	10	339	348
TRINITY_DN71221_c0_g2	1	p1	(C)12	12	57	68
TRINITY_DN86784_c0_g1	1	p2	(GA)12	24	34	57
TRINITY_DN144006_c0_g1	1	p1	(T)10	10	454	463
TRINITY_DN80651_c1_g1	1	p1	(A)14	14	58	71
TRINITY_DN95675_c0_g4	1	p1	(T)10	10	288	297
TRINITY_DN88385_c2_g2	1	p1	(T)10	10	1307	1316
TRINITY_DN88385_c2_g2	2	p1	(A)10	10	1815	1824
TRINITY_DN88385_c2_g2	3	p1	(A)11	11	3610	3620
TRINITY_DN88385_c2_g2	4	c	(A)12ttggttaaccgaaaagtaagttctacttcaagagtatataaaacagtaacagc(A)18	83	3898	3980
TRINITY_DN71305_c0_g1	1	p2	(AT)6	12	723	734
TRINITY_DN91186_c2_g2	1	p1	(T)15	15	190	204
TRINITY_DN91186_c2_g2	2	p3	(ATT)11	33	512	544
TRINITY_DN91186_c2_g2	3	p6	(CCACAG)8	48	948	995
TRINITY_DN91186_c2_g4	1	p2	(TC)7	14	266	279
TRINITY_DN163190_c0_g1	1	p3	(CTT)5	15	134	148
TRINITY_DN90177_c7_g1	1	p2	(TA)7	14	80	93
TRINITY_DN93660_c2_g2	1	p1	(T)15	15	227	241
TRINITY_DN93660_c2_g5	1	p2	(AG)7	14	136	149
TRINITY_DN80900_c2_g2	1	p2	(AG)7	14	208	221
TRINITY_DN80900_c2_g2	2	p3	(GTT)5	15	329	343
TRINITY_DN78791_c2_g6	1	p2	(AC)8	16	144	159
TRINITY_DN78791_c2_g5	1	p2	(AC)8	16	321	336
TRINITY_DN78791_c2_g1	1	p2	(AC)6	12	267	278
TRINITY_DN185856_c0_g1	1	p3	(TGA)5	15	102	116
TRINITY_DN77915_c1_g1	1	p1	(A)10	10	4647	4656
TRINITY_DN85956_c0_g1	1	p1	(A)17	17	822	838
TRINITY_DN85956_c0_g1	2	p1	(T)10	10	1239	1248
TRINITY_DN82496_c1_g2	1	p1	(T)22	22	962	983
TRINITY_DN95419_c0_g1	1	c	(GA)6tagagatg(GA)9	38	463	500
TRINITY_DN77931_c0_g1	1	p1	(A)11	11	1293	1303
TRINITY_DN91445_c1_g2	1	p2	(CT)14	28	52	79
TRINITY_DN83687_c0_g2	1	p2	(AT)6	12	462	473
TRINITY_DN94328_c2_g3	1	p1	(A)10	10	184	193
TRINITY_DN131315_c0_g1	1	p1	(A)10	10	250	259
TRINITY_DN76246_c1_g1	1	p1	(T)19	19	456	474
TRINITY_DN96298_c0_g1	1	p3	(ATT)5	15	20	34
TRINITY_DN96298_c0_g1	2	p1	(T)26	26	197	222
TRINITY_DN92212_c1_g1	1	p2	(GA)8	16	147	162
TRINITY_DN63829_c0_g1	1	p1	(A)10	10	278	287
TRINITY_DN99007_c12_g1	1	p2	(AT)11	22	975	996
TRINITY_DN73429_c0_g1	1	p1	(A)19	19	1189	1207
TRINITY_DN85913_c0_g1	1	p1	(T)17	17	241	257
TRINITY_DN84164_c2_g2	1	p2	(AC)8	16	254	269
TRINITY_DN98547_c3_g1	1	p1	(T)19	19	5	23
TRINITY_DN91800_c0_g1	1	p2	(TA)6	12	583	594
TRINITY_DN91203_c0_g1	1	p1	(T)10	10	857	866
TRINITY_DN90055_c1_g1	1	c	(AG)9a(AG)6	31	158	188
TRINITY_DN83979_c0_g2	1	p1	(T)10	10	1995	2004
TRINITY_DN74292_c3_g1	1	p1	(A)11	11	1223	1233
TRINITY_DN85670_c1_g2	1	p2	(AT)9	18	509	526
TRINITY_DN78294_c0_g2	1	p1	(T)12	12	84	95
TRINITY_DN89104_c3_g1	1	p2	(GA)6	12	317	328
TRINITY_DN74140_c0_g1	1	p1	(T)12	12	158	169
TRINITY_DN69110_c1_g2	1	c	(GA)7tcaaacacttagtgattaaacttgtttatctggtttgaaaatgaaggcttgtggagttataagtagaagaggaaac(T)10	100	1546	1645
TRINITY_DN48209_c0_g2	1	p1	(G)15	15	233	247
TRINITY_DN83829_c0_g11	1	c	(GA)6tagaagcagagagatggtggaggtcgagagagagagg(GA)10	69	8	76
TRINITY_DN70781_c0_g2	1	p2	(TA)7	14	271	284
TRINITY_DN70781_c0_g2	2	p1	(A)10	10	512	521
TRINITY_DN70781_c0_g3	1	p2	(CA)6	12	922	933
TRINITY_DN70781_c0_g3	2	p2	(TA)19	38	1449	1486
TRINITY_DN70781_c0_g1	1	p2	(AG)6	12	2946	2957
TRINITY_DN70781_c0_g4	1	p2	(TC)6	12	57	68
TRINITY_DN70781_c0_g5	1	p2	(AT)19	38	268	305
TRINITY_DN70781_c0_g5	2	p2	(TG)6	12	822	833
TRINITY_DN89845_c1_g1	1	p2	(CT)6	12	116	127
TRINITY_DN99054_c3_g1	1	p3	(ATC)5	15	331	345
TRINITY_DN99054_c3_g1	2	p2	(AG)9	18	1259	1276
TRINITY_DN95148_c0_g1	1	p1	(T)15	15	1698	1712
TRINITY_DN95148_c0_g3	1	p1	(G)11	11	331	341
TRINITY_DN95148_c0_g4	1	p1	(C)10	10	164	173
TRINITY_DN91112_c1_g2	1	p2	(TA)24	48	7	54
TRINITY_DN91112_c1_g2	2	p1	(T)15	15	723	737
TRINITY_DN74859_c0_g2	1	p1	(A)15	15	463	477
TRINITY_DN156974_c0_g1	1	p2	(CT)8	16	1	16
TRINITY_DN58792_c0_g1	1	p1	(T)10	10	172	181
TRINITY_DN70222_c2_g4	1	c	(A)11gaaaagaaaaaagaag(A)11	38	120	157
TRINITY_DN78274_c1_g1	1	p1	(A)10	10	37	46
TRINITY_DN77372_c0_g1	1	p1	(A)10	10	1322	1331
TRINITY_DN77372_c0_g4	1	p1	(T)12	12	558	569
TRINITY_DN92283_c0_g7	1	p1	(C)11	11	135	145
TRINITY_DN99031_c0_g1	1	p2	(CT)8	16	135	150
TRINITY_DN92283_c0_g9	1	p1	(C)11	11	135	145
TRINITY_DN205775_c0_g1	1	p3	(GTC)5	15	165	179
TRINITY_DN92283_c0_g8	1	p1	(T)11	11	782	792
TRINITY_DN63140_c0_g1	1	p1	(A)11	11	320	330
TRINITY_DN88963_c1_g2	1	p2	(AG)6	12	2522	2533
TRINITY_DN79660_c0_g3	1	p1	(T)10	10	51	60
TRINITY_DN78506_c0_g1	1	c	(CT)9gtctatctggttttgaaaacctagggttttgagaaaaaaagttgcaacggggaagtgccaacttagagggtgtttggccccc(T)11	111	1220	1330
TRINITY_DN82575_c0_g5	1	p1	(A)10	10	220	229
TRINITY_DN79948_c1_g1	1	p1	(T)16	16	64	79
TRINITY_DN81745_c3_g1	1	p3	(CCA)6	18	2633	2650
TRINITY_DN90762_c1_g5	1	p1	(T)10	10	331	340
TRINITY_DN73469_c1_g1	1	p3	(AGT)5	15	951	965
TRINITY_DN73469_c1_g1	2	p2	(GA)9	18	1178	1195
TRINITY_DN70718_c1_g1	1	p1	(T)10	10	1027	1036
TRINITY_DN148029_c0_g1	1	p1	(T)10	10	28	37
TRINITY_DN88497_c1_g2	1	p2	(TA)6	12	262	273
TRINITY_DN67861_c0_g1	1	p1	(A)10	10	201	210
TRINITY_DN89257_c0_g4	1	p1	(T)12	12	100	111
TRINITY_DN89257_c0_g2	1	p1	(A)11	11	511	521
TRINITY_DN95208_c1_g5	1	p2	(AT)6	12	415	426
TRINITY_DN95208_c1_g6	1	p1	(T)12	12	398	409
TRINITY_DN202566_c0_g1	1	p1	(A)11	11	1	11
TRINITY_DN69320_c0_g3	1	p1	(T)11	11	621	631
TRINITY_DN69320_c0_g1	1	p1	(A)11	11	743	753
TRINITY_DN123972_c0_g1	1	p1	(A)11	11	2	12
TRINITY_DN92025_c3_g4	1	p1	(T)10	10	87	96
TRINITY_DN63359_c0_g3	1	p3	(GCC)5	15	207	221
TRINITY_DN99029_c4_g1	1	c	(GA)6c(AG)10	33	53	85
TRINITY_DN85119_c3_g2	1	p3	(CCT)5	15	108	122
TRINITY_DN85119_c3_g2	2	p3	(ACC)10	30	225	254
TRINITY_DN96606_c0_g3	1	p1	(T)13	13	11	23
TRINITY_DN92158_c0_g6	1	p1	(A)13	13	1	13
TRINITY_DN1766_c0_g1	1	p1	(T)10	10	67	76
TRINITY_DN38901_c0_g1	1	p3	(CGC)5	15	220	234
TRINITY_DN136468_c0_g1	1	p1	(A)12	12	4	15
TRINITY_DN90268_c0_g2	1	p3	(GCT)5	15	93	107
TRINITY_DN90268_c0_g2	2	p3	(GCT)5	15	216	230
TRINITY_DN90268_c0_g3	1	p3	(GCT)5	15	71	85
TRINITY_DN93295_c0_g2	1	p1	(T)11	11	44	54
TRINITY_DN90268_c0_g1	1	p3	(GCG)5	15	653	667
TRINITY_DN83001_c0_g3	1	p2	(GA)6	12	2180	2191
TRINITY_DN83001_c0_g2	1	p1	(T)13	13	1050	1062
TRINITY_DN83001_c0_g1	1	p1	(T)11	11	124	134
TRINITY_DN97122_c2_g1	1	p1	(A)24	24	1	24
TRINITY_DN97122_c2_g1	2	p1	(A)11	11	457	467
TRINITY_DN45574_c0_g1	1	p1	(A)11	11	1	11
TRINITY_DN84605_c3_g1	1	p1	(T)10	10	666	675
TRINITY_DN84605_c3_g1	2	p1	(T)14	14	818	831
TRINITY_DN84605_c3_g2	1	p4	(CATA)5	20	758	777
TRINITY_DN88826_c0_g3	1	p1	(A)49	49	451	499
TRINITY_DN94996_c1_g4	1	p1	(T)22	22	1183	1204
TRINITY_DN82560_c0_g4	1	p1	(T)15	15	186	200
TRINITY_DN82560_c0_g2	1	p1	(A)10	10	1335	1344
TRINITY_DN179113_c0_g1	1	p1	(T)13	13	19	31
TRINITY_DN1307_c0_g1	1	p2	(TA)7	14	223	236
TRINITY_DN73168_c0_g1	1	p2	(GA)7	14	257	270
TRINITY_DN22902_c0_g1	1	p3	(CGG)5	15	10	24
TRINITY_DN74595_c1_g2	1	p3	(TTC)6	18	660	677
TRINITY_DN70253_c0_g1	1	p4	(AAAG)9	36	250	285
TRINITY_DN94489_c1_g1	1	p1	(C)19	19	5	23
TRINITY_DN75637_c1_g3	1	p1	(A)10	10	307	316
TRINITY_DN75637_c1_g5	1	p1	(T)11	11	238	248
TRINITY_DN88987_c0_g4	1	p1	(T)14	14	365	378
TRINITY_DN88987_c0_g3	1	c	(T)15aagtgtttgatacatgcgtaataggttatcaa(T)10	57	83	139
TRINITY_DN70626_c0_g3	1	p1	(A)12	12	238	249
TRINITY_DN70229_c3_g2	1	p1	(A)10	10	33	42
TRINITY_DN74300_c0_g1	1	p1	(T)13	13	454	466
TRINITY_DN212109_c0_g1	1	p1	(T)10	10	28	37
TRINITY_DN72900_c0_g1	1	p2	(TG)8	16	1754	1769
TRINITY_DN37764_c0_g1	1	p1	(T)10	10	125	134
TRINITY_DN72375_c0_g6	1	p1	(A)10	10	30	39
TRINITY_DN72375_c0_g1	1	p1	(T)10	10	310	319
TRINITY_DN87196_c1_g7	1	p2	(GT)7	14	263	276
TRINITY_DN91164_c1_g1	1	p1	(A)10	10	725	734
TRINITY_DN80437_c0_g1	1	p1	(T)11	11	1873	1883
TRINITY_DN91164_c1_g3	1	p1	(T)16	16	353	368
TRINITY_DN52231_c0_g1	1	p2	(AG)6	12	1115	1126
TRINITY_DN98192_c2_g1	1	p2	(AT)6	12	956	967
TRINITY_DN85364_c0_g5	1	p3	(TGA)5	15	858	872
TRINITY_DN85364_c0_g4	1	p3	(TGC)5	15	143	157
TRINITY_DN85364_c0_g6	1	p3	(TGA)5	15	695	709
TRINITY_DN98192_c2_g3	1	p1	(A)10	10	778	787
TRINITY_DN86167_c1_g1	1	p1	(A)16	16	596	611
TRINITY_DN86884_c4_g1	1	p3	(TCT)6	18	2519	2536
TRINITY_DN92940_c1_g1	1	p2	(CT)6	12	192	203
TRINITY_DN71756_c1_g3	1	p2	(GA)6	12	291	302
TRINITY_DN86008_c1_g4	1	p3	(TGG)5	15	259	273
TRINITY_DN78533_c0_g1	1	p1	(T)11	11	1194	1204
TRINITY_DN79423_c5_g4	1	p1	(A)11	11	299	309
TRINITY_DN75150_c1_g2	1	p1	(T)32	32	1	32
TRINITY_DN75150_c1_g3	1	p1	(T)11	11	55	65
TRINITY_DN75150_c1_g1	1	p1	(T)22	22	147	168
TRINITY_DN75150_c1_g6	1	p1	(T)14	14	27	40
TRINITY_DN88796_c0_g1	1	p2	(TC)8	16	56	71
TRINITY_DN82601_c1_g1	1	p1	(A)12	12	2109	2120
TRINITY_DN82601_c1_g2	1	p3	(GCA)6	18	806	823
TRINITY_DN94514_c0_g1	1	p2	(TC)8	16	86	101
TRINITY_DN94514_c0_g4	1	c	(TC)10cctctctt(TC)6cctcccccgctctctccctcc(CT)6	73	110	182
TRINITY_DN82770_c0_g2	1	p1	(T)10	10	258	267
TRINITY_DN182319_c0_g1	1	p1	(A)11	11	158	168
TRINITY_DN88232_c0_g1	1	p1	(A)10	10	102	111
TRINITY_DN94257_c1_g1	1	c	(C)12agttatatttacattcacttggtacatcatgccatatattagatacattttctagaactaagacgtttactttgttcttctcaag(A)10	107	836	942
TRINITY_DN94257_c1_g1	2	p1	(T)13	13	3092	3104
TRINITY_DN74666_c0_g2	1	p6	(CAACAC)7	42	367	408
TRINITY_DN75137_c0_g1	1	p1	(A)10	10	552	561
TRINITY_DN98883_c5_g3	1	p1	(G)12	12	446	457
TRINITY_DN70465_c0_g1	1	p2	(TA)7	14	556	569
TRINITY_DN82830_c1_g2	1	p3	(ATT)5	15	1815	1829
TRINITY_DN82830_c1_g1	1	p1	(A)10	10	1400	1409
TRINITY_DN96405_c0_g3	1	p1	(A)14	14	32	45
TRINITY_DN96405_c0_g3	2	p1	(A)10	10	309	318
TRINITY_DN52625_c0_g1	1	p1	(T)12	12	446	457
TRINITY_DN94804_c6_g5	1	p1	(A)10	10	12	21
TRINITY_DN5700_c0_g1	1	p2	(AT)14	28	200	227
TRINITY_DN6156_c0_g1	1	p1	(A)11	11	58	68
TRINITY_DN80183_c1_g1	1	c	(CA)25(TA)6	62	146	207
TRINITY_DN89513_c0_g3	1	p1	(T)10	10	124	133
TRINITY_DN89513_c0_g5	1	p1	(T)10	10	216	225
TRINITY_DN89513_c0_g4	1	p4	(ATAA)5	20	64	83
TRINITY_DN83742_c4_g1	1	p3	(CCA)5	15	197	211
TRINITY_DN82904_c2_g1	1	p1	(A)14	14	91	104
TRINITY_DN82904_c2_g1	2	p2	(GT)8	16	2283	2298
TRINITY_DN81104_c0_g3	1	p1	(T)11	11	1211	1221
TRINITY_DN81104_c0_g3	2	p1	(A)11	11	1352	1362
TRINITY_DN81104_c0_g5	1	p1	(A)11	11	111	121
TRINITY_DN98505_c4_g1	1	p1	(A)10	10	704	713
TRINITY_DN90003_c1_g3	1	p1	(T)14	14	55	68
TRINITY_DN90003_c1_g4	1	p2	(AC)7	14	754	767
TRINITY_DN71256_c1_g2	1	p1	(T)16	16	734	749
TRINITY_DN71256_c1_g2	2	p1	(A)16	16	930	945
TRINITY_DN71256_c1_g1	1	p2	(AG)8	16	1145	1160
TRINITY_DN97261_c4_g1	1	p1	(T)10	10	216	225
TRINITY_DN95071_c0_g2	1	p1	(A)11	11	233	243
TRINITY_DN86247_c0_g1	1	p1	(T)11	11	55	65
TRINITY_DN83270_c3_g1	1	p2	(GA)23	46	116	161
TRINITY_DN83270_c3_g2	1	p3	(ACC)7	21	243	263
TRINITY_DN83270_c3_g2	2	p3	(TCA)5	15	579	593
TRINITY_DN83270_c3_g2	3	c	(GA)6cgtacaatggaggc(GA)7	40	753	792
TRINITY_DN5409_c0_g1	1	p1	(T)11	11	210	220
TRINITY_DN81689_c0_g1	1	p2	(GA)8	16	354	369
TRINITY_DN85819_c1_g1	1	p2	(TG)13	26	289	314
TRINITY_DN65792_c0_g1	1	p1	(T)10	10	514	523
TRINITY_DN86171_c1_g2	1	p1	(A)18	18	184	201
TRINITY_DN66119_c0_g1	1	p1	(T)10	10	109	118
TRINITY_DN53353_c0_g1	1	p1	(T)10	10	274	283
TRINITY_DN92606_c4_g5	1	p2	(TC)7	14	11	24
TRINITY_DN85065_c0_g3	1	p1	(T)10	10	13	22
TRINITY_DN85065_c0_g3	2	p1	(T)10	10	125	134
TRINITY_DN85065_c0_g2	1	p1	(A)11	11	392	402
TRINITY_DN85065_c0_g1	1	p1	(A)10	10	955	964
TRINITY_DN85065_c0_g1	2	p1	(A)10	10	1982	1991
TRINITY_DN85065_c0_g5	1	p2	(AC)6	12	282	293
TRINITY_DN98501_c4_g1	1	p1	(A)10	10	488	497
TRINITY_DN76933_c0_g1	1	p2	(TA)6	12	1419	1430
TRINITY_DN62462_c0_g1	1	p3	(ACT)5	15	1120	1134
TRINITY_DN43570_c0_g1	1	p1	(T)10	10	934	943
TRINITY_DN129007_c0_g1	1	p1	(A)10	10	213	222
TRINITY_DN88762_c1_g1	1	p2	(TG)7	14	38	51
TRINITY_DN88762_c1_g1	2	p2	(TG)7	14	452	465
TRINITY_DN96986_c2_g1	1	p2	(TG)6	12	821	832
TRINITY_DN192182_c0_g1	1	p2	(AT)7	14	44	57
TRINITY_DN81374_c1_g1	1	p1	(A)18	18	480	497
TRINITY_DN87238_c0_g1	1	p1	(T)12	12	37	48
TRINITY_DN85485_c0_g1	1	p2	(TC)15	30	1	30
TRINITY_DN71469_c1_g1	1	p2	(AT)6	12	533	544
TRINITY_DN84944_c0_g2	1	p1	(T)10	10	1311	1320
TRINITY_DN65013_c2_g1	1	p2	(AG)7	14	390	403
TRINITY_DN77910_c1_g1	1	p1	(T)15	15	1566	1580
TRINITY_DN73077_c0_g2	1	p1	(T)10	10	68	77
TRINITY_DN83160_c0_g1	1	p1	(T)11	11	311	321
TRINITY_DN139579_c0_g1	1	p1	(T)11	11	266	276
TRINITY_DN182970_c0_g1	1	p2	(TG)7	14	19	32
TRINITY_DN182970_c0_g1	2	p2	(AC)6	12	258	269
TRINITY_DN83349_c6_g1	1	p2	(TG)8	16	491	506
TRINITY_DN83349_c6_g1	2	c*	(AG)16(G)14*	45	1055	1099
TRINITY_DN87617_c1_g2	1	p1	(A)11	11	1081	1091
TRINITY_DN78137_c0_g3	1	p1	(A)11	11	649	659
TRINITY_DN78137_c0_g2	1	p2	(GT)6	12	14	25
TRINITY_DN78137_c0_g2	2	p2	(GT)6	12	179	190
TRINITY_DN93788_c2_g3	1	p2	(TA)12	24	203	226
TRINITY_DN97956_c2_g1	1	c	(AG)6gagggagga(G)13cttactgggaaaaac(ATA)5agaaactatatccttcctggagttggaaacataaaacataattctgcagagagccttgccttgtg(GA)12	153	155	307
TRINITY_DN97956_c2_g2	1	p4	(TTTC)5	20	666	685
TRINITY_DN87829_c2_g3	1	p1	(T)10	10	810	819
TRINITY_DN87829_c2_g3	2	p1	(T)21	21	1217	1237
TRINITY_DN58277_c0_g1	1	p2	(AT)11	22	16	37
TRINITY_DN98408_c1_g2	1	p1	(T)10	10	4	13
TRINITY_DN72203_c1_g1	1	p1	(A)10	10	268	277
TRINITY_DN73135_c1_g3	1	p2	(TC)6	12	350	361
TRINITY_DN71926_c0_g1	1	p1	(A)10	10	1599	1608
TRINITY_DN92967_c0_g1	1	p1	(A)11	11	296	306
TRINITY_DN98857_c2_g1	1	p1	(A)11	11	400	410
TRINITY_DN73086_c0_g1	1	p1	(A)12	12	1132	1143
TRINITY_DN71643_c2_g2	1	p1	(A)12	12	558	569
TRINITY_DN92923_c2_g2	1	p2	(AG)15	30	886	915
TRINITY_DN92923_c2_g3	1	p2	(GT)8	16	7	22
TRINITY_DN92923_c2_g3	2	p3	(TGT)5	15	125	139
TRINITY_DN92923_c2_g1	1	p1	(T)11	11	40	50
TRINITY_DN92923_c2_g1	2	p1	(T)10	10	388	397
TRINITY_DN98508_c6_g3	1	p1	(T)10	10	171	180
TRINITY_DN91004_c0_g2	1	p1	(T)10	10	883	892
TRINITY_DN98317_c1_g1	1	p1	(A)10	10	2709	2718
TRINITY_DN98317_c1_g1	2	p1	(T)10	10	3467	3476
TRINITY_DN68986_c1_g1	1	p1	(A)10	10	745	754
TRINITY_DN77902_c1_g6	1	p1	(T)11	11	762	772
TRINITY_DN94901_c2_g1	1	p2	(CT)14	28	163	190
TRINITY_DN73111_c3_g1	1	p1	(C)12	12	9	20
TRINITY_DN74621_c2_g2	1	p1	(T)28	28	691	718
TRINITY_DN97859_c1_g1	1	p1	(T)10	10	1646	1655
TRINITY_DN37088_c0_g1	1	p1	(A)15	15	4	18
TRINITY_DN64920_c0_g1	1	p1	(T)11	11	1027	1037
TRINITY_DN70949_c1_g5	1	c	(CT)13gtgtc(CT)9gtgtc(CT)7gtgtgtcctt(TC)6tgtgtcctcc(CT)7	114	60	173
TRINITY_DN97090_c1_g1	1	p2	(AC)6	12	454	465
TRINITY_DN97090_c1_g1	2	c	(CA)6gctgtaaagatacacacgcacacacagcaacatatgc(CA)6	61	568	628
TRINITY_DN95053_c1_g4	1	p2	(AG)7	14	585	598
TRINITY_DN98413_c1_g1	1	p1	(A)10	10	110	119
TRINITY_DN98413_c1_g1	2	p2	(AC)10	20	256	275
TRINITY_DN116994_c0_g1	1	p1	(T)10	10	177	186
TRINITY_DN14046_c0_g1	1	p1	(T)13	13	70	82
TRINITY_DN97553_c3_g1	1	p1	(T)11	11	79	89
TRINITY_DN98301_c1_g2	1	p1	(A)10	10	602	611
TRINITY_DN80877_c0_g3	1	p1	(A)11	11	786	796
TRINITY_DN80877_c0_g2	1	p1	(A)11	11	1121	1131
TRINITY_DN91099_c2_g1	1	p3	(CAT)5	15	536	550
TRINITY_DN91099_c2_g1	2	p2	(GA)12	24	3021	3044
TRINITY_DN91099_c2_g2	1	c	(GA)6ggcccaggc(GA)6ggcccaggc(GA)6cagagagagcgagtgcgagagagaaacagagagagagtcccaggcgatagagaaagagagac(AG)7cacgcgagagagaaagacagagagagcgcgagagaaact(GA)8	185	12	196
TRINITY_DN185502_c0_g1	1	p3	(CGC)5	15	200	214
TRINITY_DN74529_c4_g1	1	p2	(AG)10	20	552	571
TRINITY_DN90035_c1_g1	1	p2	(TG)10	20	1284	1303
TRINITY_DN79646_c1_g2	1	p1	(A)19	19	2612	2630
TRINITY_DN2504_c0_g1	1	p1	(A)10	10	254	263
TRINITY_DN82581_c0_g1	1	p1	(T)14	14	340	353
TRINITY_DN76364_c1_g2	1	p2	(AT)6	12	1694	1705
TRINITY_DN76364_c1_g3	1	c	(TC)6ccaa(TC)19	54	360	413
TRINITY_DN76364_c1_g4	1	p2	(AG)7	14	417	430
TRINITY_DN100798_c0_g1	1	p1	(T)11	11	2	12
TRINITY_DN77053_c0_g1	1	p1	(A)11	11	37	47
TRINITY_DN77053_c0_g1	2	p2	(CA)6	12	2039	2050
TRINITY_DN88209_c0_g2	1	p2	(AG)6	12	118	129
TRINITY_DN98982_c6_g1	1	p1	(A)10	10	70	79
TRINITY_DN98982_c6_g1	2	c	(T)10attttaa(T)18	35	1180	1214
TRINITY_DN89707_c1_g2	1	p2	(TC)6	12	113	124
TRINITY_DN89707_c1_g2	2	p3	(AGC)8	24	557	580
TRINITY_DN71771_c1_g1	1	p1	(T)38	38	97	134
TRINITY_DN81690_c0_g3	1	p2	(TA)7	14	137	150
TRINITY_DN82393_c3_g1	1	c	(A)18tctcttcccacttcaatttactccgtcttcttgcaataagtcaaatttatgtgtaccgttag(T)10	90	2	91
TRINITY_DN65731_c0_g1	1	p2	(CA)6	12	289	300
TRINITY_DN86800_c3_g2	1	p1	(A)13	13	169	181
TRINITY_DN71701_c4_g1	1	p2	(GA)6	12	14	25
TRINITY_DN89903_c1_g2	1	p1	(A)10	10	607	616
TRINITY_DN89903_c1_g2	2	p1	(A)10	10	1007	1016
TRINITY_DN72867_c0_g1	1	p2	(TC)18	36	34	69
TRINITY_DN79410_c1_g1	1	p1	(T)12	12	3915	3926
TRINITY_DN105305_c0_g1	1	p1	(T)10	10	37	46
TRINITY_DN89449_c0_g1	1	p1	(T)12	12	1818	1829
TRINITY_DN80286_c2_g4	1	p1	(A)11	11	48	58
TRINITY_DN80286_c2_g4	2	p1	(A)11	11	172	182
TRINITY_DN87891_c1_g1	1	p2	(TG)6	12	385	396
TRINITY_DN87891_c1_g1	2	p2	(TA)6	12	557	568
TRINITY_DN86573_c2_g1	1	p2	(CA)6	12	575	586
TRINITY_DN74613_c2_g1	1	c	(T)20gaa(T)11	34	179	212
TRINITY_DN95902_c1_g1	1	p1	(T)13	13	307	319
TRINITY_DN90906_c0_g2	1	p1	(T)10	10	47	56
TRINITY_DN87601_c0_g4	1	p1	(T)14	14	6	19
TRINITY_DN87601_c0_g1	1	p2	(TC)7	14	1	14
TRINITY_DN83955_c0_g1	1	p1	(T)10	10	52	61
TRINITY_DN88516_c0_g2	1	p1	(T)11	11	353	363
TRINITY_DN98562_c4_g4	1	p1	(T)10	10	539	548
TRINITY_DN75250_c1_g1	1	p3	(GAT)5	15	355	369
TRINITY_DN94460_c2_g3	1	p2	(CT)7	14	162	175
TRINITY_DN79150_c2_g3	1	p2	(GA)6	12	1	12
TRINITY_DN99009_c1_g1	1	p1	(T)16	16	61	76
TRINITY_DN99009_c1_g1	2	p3	(TGC)5	15	315	329
TRINITY_DN86275_c1_g2	1	p3	(ATC)8	24	617	640
TRINITY_DN90580_c1_g3	1	p2	(AG)7	14	760	773
TRINITY_DN90580_c1_g4	1	p1	(T)14	14	174	187
TRINITY_DN90097_c0_g1	1	p1	(A)11	11	256	266
TRINITY_DN88243_c0_g1	1	p1	(A)11	11	185	195
TRINITY_DN67575_c0_g1	1	p1	(A)12	12	21	32
TRINITY_DN85535_c0_g1	1	p2	(TG)7	14	340	353
TRINITY_DN85535_c0_g3	1	p3	(GGA)5	15	68	82
TRINITY_DN85535_c0_g2	1	p1	(A)10	10	634	643
TRINITY_DN85535_c0_g2	2	p1	(A)14	14	1016	1029
TRINITY_DN85535_c0_g2	3	p1	(T)14	14	3739	3752
TRINITY_DN81534_c2_g1	1	p1	(T)10	10	202	211
TRINITY_DN94624_c1_g1	1	p1	(A)11	11	205	215
TRINITY_DN93052_c1_g1	1	p1	(A)25	25	366	390
TRINITY_DN85758_c4_g1	1	p1	(T)16	16	2185	2200
TRINITY_DN79956_c3_g3	1	p2	(AC)8	16	941	956
TRINITY_DN79956_c3_g1	1	p2	(AC)6	12	159	170
TRINITY_DN94390_c0_g4	1	p2	(AG)8	16	107	122
TRINITY_DN94390_c0_g1	1	p2	(CT)8	16	1099	1114
TRINITY_DN77839_c2_g1	1	p2	(GA)7	14	339	352
TRINITY_DN75208_c1_g4	1	p1	(T)11	11	476	486
TRINITY_DN85139_c0_g1	1	p1	(T)13	13	232	244
TRINITY_DN85139_c0_g2	1	p2	(CA)6	12	210	221
TRINITY_DN98763_c4_g1	1	p1	(A)10	10	158	167
TRINITY_DN73037_c0_g1	1	p1	(T)15	15	1112	1126
TRINITY_DN92741_c0_g3	1	p2	(TG)6	12	464	475
TRINITY_DN81028_c1_g1	1	p2	(TC)6	12	6	17
TRINITY_DN81028_c1_g3	1	p1	(A)14	14	582	595
TRINITY_DN78000_c0_g4	1	c	(TG)6agg(GA)9	33	296	328
TRINITY_DN78000_c0_g1	1	p1	(A)16	16	623	638
TRINITY_DN78000_c0_g1	2	p2	(GA)12	24	1885	1908
TRINITY_DN92341_c0_g1	1	p2	(CA)6	12	527	538
TRINITY_DN87597_c1_g1	1	p2	(GA)9	18	668	685
TRINITY_DN83936_c2_g1	1	p3	(GTG)7	21	875	895
TRINITY_DN146829_c0_g1	1	p1	(T)10	10	272	281
TRINITY_DN29125_c0_g1	1	p3	(CCA)5	15	69	83
TRINITY_DN74443_c3_g1	1	p2	(CA)13	26	192	217
TRINITY_DN76692_c0_g1	1	p2	(TA)8	16	341	356
TRINITY_DN97455_c2_g1	1	p1	(A)16	16	400	415
TRINITY_DN92190_c1_g2	1	c	(CT)7ccctctctctccgggaaaattca(CT)6	49	50	98
TRINITY_DN75413_c2_g5	1	p3	(CAT)7	21	128	148
TRINITY_DN75413_c2_g2	1	p1	(T)10	10	186	195
TRINITY_DN80003_c1_g6	1	p1	(T)11	11	647	657
TRINITY_DN80298_c1_g1	1	p1	(A)10	10	745	754
TRINITY_DN78271_c1_g3	1	c	(AC)6gattgttta(AC)6gctgctctta(AC)11	65	2	66
TRINITY_DN70903_c0_g1	1	p1	(A)11	11	791	801
TRINITY_DN92917_c0_g1	1	p3	(GTT)6	18	768	785
TRINITY_DN75310_c0_g2	1	p1	(A)10	10	1148	1157
TRINITY_DN75310_c0_g1	1	p1	(A)10	10	133	142
TRINITY_DN83365_c1_g1	1	p2	(GA)6	12	1268	1279
TRINITY_DN75746_c1_g5	1	p1	(A)10	10	10	19
TRINITY_DN69282_c0_g1	1	p4	(ATAC)5	20	110	129
TRINITY_DN92635_c1_g2	1	p1	(A)11	11	444	454
TRINITY_DN70628_c4_g1	1	p2	(AC)7	14	60	73
TRINITY_DN79149_c0_g1	1	p3	(AAG)16	48	467	514
TRINITY_DN88201_c1_g3	1	p2	(TC)7	14	129	142
TRINITY_DN79362_c2_g2	1	p2	(GA)11	22	2603	2624
TRINITY_DN91902_c4_g2	1	p2	(TG)9	18	842	859
TRINITY_DN91902_c4_g1	1	p3	(TCC)7	21	166	186
TRINITY_DN87950_c2_g1	1	p2	(AT)8	16	1032	1047
TRINITY_DN81883_c4_g3	1	p2	(AT)6	12	37	48
TRINITY_DN84219_c0_g1	1	p2	(CT)6	12	71	82
TRINITY_DN202527_c0_g1	1	p1	(A)10	10	6	15
TRINITY_DN152941_c0_g1	1	p3	(GCT)5	15	173	187
TRINITY_DN74245_c3_g9	1	p2	(TC)7	14	196	209
TRINITY_DN88633_c0_g1	1	p2	(GA)6	12	205	216
TRINITY_DN56393_c0_g1	1	p1	(A)10	10	396	405
TRINITY_DN84064_c1_g1	1	p2	(GA)8	16	12	27
TRINITY_DN88787_c1_g2	1	p1	(T)17	17	90	106
TRINITY_DN74853_c0_g3	1	p1	(T)14	14	48	61
TRINITY_DN74853_c0_g5	1	p1	(T)14	14	704	717
TRINITY_DN96677_c0_g5	1	p3	(CAT)6	18	77	94
TRINITY_DN92820_c1_g2	1	p2	(AC)10	20	183	202
TRINITY_DN92820_c1_g2	2	p1	(T)13	13	466	478
TRINITY_DN83617_c0_g5	1	p1	(A)12	12	790	801
TRINITY_DN95422_c2_g3	1	p2	(AG)6	12	268	279
TRINITY_DN79448_c0_g2	1	p1	(A)14	14	471	484
TRINITY_DN79448_c0_g1	1	p1	(A)10	10	281	290
TRINITY_DN79448_c0_g1	2	p1	(T)12	12	2760	2771
TRINITY_DN91396_c1_g3	1	p2	(TA)6	12	276	287
TRINITY_DN77670_c0_g1	1	p1	(T)18	18	1	18
TRINITY_DN79882_c0_g1	1	p2	(GA)8	16	1960	1975
TRINITY_DN81667_c1_g1	1	p1	(T)21	21	634	654
TRINITY_DN21760_c0_g1	1	c	(A)12caaataggaaatcaaataaagtaaaat(A)10	49	122	170
TRINITY_DN75785_c1_g7	1	p1	(A)11	11	1087	1097
TRINITY_DN80518_c1_g2	1	p2	(TA)6	12	90	101
TRINITY_DN75428_c2_g1	1	p1	(T)12	12	164	175
TRINITY_DN86293_c0_g1	1	p2	(AT)9	18	39	56
TRINITY_DN82525_c0_g1	1	p1	(T)17	17	414	430
TRINITY_DN56257_c0_g2	1	p2	(AC)7	14	302	315
TRINITY_DN97060_c3_g1	1	p2	(GT)9	18	353	370
TRINITY_DN97060_c3_g2	1	c	(TC)8c(CT)7	31	294	324
TRINITY_DN83480_c2_g5	1	p1	(T)11	11	216	226
TRINITY_DN68166_c0_g1	1	p1	(T)10	10	1	10
TRINITY_DN93234_c0_g4	1	c	(TG)7tttattggaa(T)12	36	354	389
TRINITY_DN87391_c1_g1	1	p2	(AT)6	12	1	12
TRINITY_DN69367_c2_g4	1	c	(T)11ctcttccttttcctctctcccg(AT)7	47	130	176
TRINITY_DN73969_c1_g4	1	p1	(A)18	18	161	178
TRINITY_DN77793_c0_g1	1	p1	(T)12	12	781	792
TRINITY_DN94896_c1_g4	1	p2	(GA)21	42	1628	1669
TRINITY_DN81806_c1_g1	1	p2	(AT)6	12	272	283
TRINITY_DN84075_c1_g1	1	p2	(AC)8	16	416	431
TRINITY_DN46894_c0_g1	1	c	(A)10caagagaagaactaagcg(A)11	39	72	110
TRINITY_DN76505_c0_g5	1	c	(A)13caaaaac(A)10	30	212	241
TRINITY_DN76572_c0_g2	1	p2	(GT)7	14	439	452
TRINITY_DN78951_c2_g3	1	p2	(TA)12	24	62	85
TRINITY_DN78951_c2_g5	1	p2	(TA)8	16	889	904
TRINITY_DN70469_c0_g1	1	p1	(A)11	11	1328	1338
TRINITY_DN70469_c0_g1	2	p1	(T)10	10	1760	1769
TRINITY_DN82951_c0_g8	1	p1	(A)10	10	331	340
TRINITY_DN82951_c0_g6	1	p1	(T)11	11	1322	1332
TRINITY_DN66683_c0_g1	1	p2	(GA)11	22	415	436
TRINITY_DN80819_c1_g2	1	p1	(T)15	15	395	409
TRINITY_DN98823_c5_g1	1	p1	(T)22	22	1	22
TRINITY_DN84654_c0_g3	1	p2	(GT)7	14	1859	1872
TRINITY_DN74394_c3_g1	1	p2	(GA)7	14	471	484
TRINITY_DN97654_c1_g1	1	p1	(T)12	12	3455	3466
TRINITY_DN54470_c0_g1	1	p1	(G)10	10	605	614
TRINITY_DN89675_c0_g1	1	p1	(T)11	11	1270	1280
TRINITY_DN89675_c0_g1	2	p1	(G)11	11	1893	1903
TRINITY_DN73130_c1_g2	1	p2	(AG)10	20	1348	1367
TRINITY_DN73130_c1_g3	1	p1	(T)15	15	92	106
TRINITY_DN73130_c1_g1	1	p2	(TA)8	16	563	578
TRINITY_DN86477_c0_g1	1	p1	(T)13	13	613	625
TRINITY_DN87681_c1_g2	1	p1	(A)11	11	227	237
TRINITY_DN87681_c1_g2	2	p1	(A)11	11	503	513
TRINITY_DN78310_c1_g2	1	p1	(A)11	11	32	42
TRINITY_DN87166_c0_g2	1	p3	(CAC)5	15	239	253
TRINITY_DN82869_c0_g4	1	p2	(AG)11	22	1	22
TRINITY_DN96742_c5_g7	1	p2	(TC)11	22	20	41
TRINITY_DN96742_c5_g7	2	p2	(TC)6	12	201	212
TRINITY_DN91076_c0_g4	1	p1	(T)14	14	267	280
TRINITY_DN82869_c0_g2	1	p2	(GA)18	36	3838	3873
TRINITY_DN95399_c0_g1	1	p2	(GA)18	36	1122	1157
TRINITY_DN96742_c5_g4	1	p2	(CT)12	24	45	68
TRINITY_DN86095_c0_g1	1	p2	(CT)11	22	1	22
TRINITY_DN98687_c2_g2	1	p1	(T)25	25	294	318
TRINITY_DN92767_c0_g1	1	p2	(GA)7	14	71	84
TRINITY_DN92767_c0_g1	2	p2	(GA)8	16	284	299
TRINITY_DN92767_c0_g1	3	p1	(T)20	20	660	679
TRINITY_DN90394_c0_g2	1	p1	(T)10	10	1006	1015
TRINITY_DN90394_c0_g8	1	p1	(A)11	11	92	102
TRINITY_DN86368_c3_g3	1	p2	(TC)9	18	552	569
TRINITY_DN88404_c0_g3	1	p1	(A)15	15	1	15
TRINITY_DN90109_c1_g2	1	p3	(ATT)5	15	533	547
TRINITY_DN74610_c1_g4	1	p1	(T)10	10	168	177
TRINITY_DN74610_c1_g2	1	p2	(CT)14	28	840	867
TRINITY_DN74610_c1_g1	1	p1	(A)10	10	119	128
TRINITY_DN82180_c0_g5	1	c	(A)10taaaaaaatagtgatacgcattttttaaatgcgtgtcagggtctaacacacattttcaaaatgcgtatctggccctgaaggctgatgcgtatcacca(T)10	117	160	276
TRINITY_DN82180_c0_g2	1	p1	(T)10	10	318	327
TRINITY_DN83882_c1_g3	1	p2	(CT)11	22	1	22
TRINITY_DN88068_c1_g1	1	c	(CCA)5ccctatattgtctcctatcgtccctggctcctatttatactttctttatttagtcatgtttctcatctttcatttgcaattagcattttgc(T)14(A)12	132	797	928
TRINITY_DN89683_c1_g1	1	p1	(A)17	17	564	580
TRINITY_DN73959_c1_g3	1	p2	(AT)16	32	12	43
TRINITY_DN72911_c0_g1	1	p2	(AC)6	12	457	468
TRINITY_DN87466_c2_g1	1	p1	(A)10	10	497	506
TRINITY_DN95825_c0_g1	1	p2	(GA)7	14	2024	2037
TRINITY_DN137264_c0_g1	1	p1	(T)10	10	107	116
TRINITY_DN90119_c0_g6	1	p3	(GCA)5	15	5	19
TRINITY_DN85551_c3_g2	1	c	(GA)10taagggagagagatctggatctttagttttcttgcttcttcactttaagagggtgggggttagagtgaagaagagtaaggaaagtt(GA)11	128	358	485
TRINITY_DN92321_c1_g1	1	p2	(TG)6	12	296	307
TRINITY_DN90197_c2_g1	1	c	(GA)7aagagaggtgtgaaggagggagagagagaggagggagaaagatgtaggtgtgtgaaggagggagagatagggaggagagagata(TG)8	114	68	181
TRINITY_DN90197_c2_g2	1	p2	(TG)18	36	120	155
TRINITY_DN90183_c0_g1	1	p1	(T)11	11	1873	1883
TRINITY_DN95699_c2_g3	1	p1	(A)10	10	2	11
TRINITY_DN94889_c0_g5	1	p2	(GA)8	16	27	42
TRINITY_DN75957_c1_g1	1	p1	(A)16	16	201	216
TRINITY_DN103127_c0_g1	1	p1	(T)10	10	160	169
TRINITY_DN193015_c0_g1	1	p1	(A)11	11	88	98
TRINITY_DN87081_c2_g1	1	p1	(A)14	14	226	239
TRINITY_DN88629_c2_g1	1	p1	(T)26	26	12	37
TRINITY_DN88629_c2_g2	1	p1	(T)30	30	931	960
TRINITY_DN93756_c1_g4	1	p2	(AC)6	12	273	284
TRINITY_DN63596_c0_g1	1	p1	(A)10	10	351	360
TRINITY_DN93756_c1_g1	1	p1	(T)17	17	2	18
TRINITY_DN92156_c4_g7	1	p1	(T)10	10	139	148
TRINITY_DN91419_c3_g4	1	p1	(A)10	10	126	135
TRINITY_DN91419_c3_g3	1	p1	(A)34	34	1	34
TRINITY_DN91419_c3_g1	1	p2	(GA)19	38	2124	2161
TRINITY_DN74830_c2_g2	1	p1	(T)10	10	884	893
TRINITY_DN74830_c2_g2	2	p1	(A)16	16	1090	1105
TRINITY_DN83102_c3_g1	1	p1	(A)29	29	124	152
TRINITY_DN76923_c1_g1	1	p1	(A)11	11	100	110
TRINITY_DN76923_c1_g1	2	p1	(T)10	10	467	476
TRINITY_DN71216_c0_g7	1	p2	(AG)7	14	172	185
TRINITY_DN71216_c0_g7	2	p2	(AG)10	20	489	508
TRINITY_DN88176_c0_g1	1	p1	(A)18	18	2006	2023
TRINITY_DN198045_c0_g1	1	p2	(GA)6	12	46	57
TRINITY_DN76017_c0_g6	1	c	(CA)8a(AC)6	29	25	53
TRINITY_DN80022_c1_g1	1	p2	(TG)7	14	198	211
TRINITY_DN80022_c1_g5	1	p2	(CT)7	14	46	59
TRINITY_DN92505_c2_g1	1	p1	(A)10	10	77	86
TRINITY_DN95319_c0_g3	1	p1	(A)10	10	27	36
TRINITY_DN96105_c0_g4	1	p2	(TC)12	24	169	192
TRINITY_DN146217_c0_g1	1	p1	(T)10	10	12	21
TRINITY_DN70477_c0_g2	1	p2	(AG)7	14	1033	1046
TRINITY_DN96809_c1_g1	1	p2	(AC)11	22	1440	1461
TRINITY_DN94348_c0_g1	1	p1	(T)13	13	159	171
TRINITY_DN77270_c0_g2	1	p1	(A)12	12	72	83
TRINITY_DN75998_c0_g5	1	p2	(CT)6	12	127	138
TRINITY_DN75998_c0_g6	1	p4	(ACAT)5	20	375	394
TRINITY_DN75998_c0_g1	1	p2	(CT)18	36	54	89
TRINITY_DN89868_c0_g5	1	c	(GT)6(GA)10	32	128	159
TRINITY_DN91141_c0_g1	1	p2	(AT)6	12	257	268
TRINITY_DN62683_c0_g1	1	c	(A)10tagaaggtctcagcactggagggaaagactcggg(A)10	54	150	203
TRINITY_DN98771_c4_g4	1	p3	(TAT)6	18	70	87
TRINITY_DN90268_c1_g2	1	p1	(T)10	10	284	293
TRINITY_DN76259_c0_g2	1	c	(TC)20ccgtcaataaaccctcgttactctctctcta(TC)8	87	181	267
TRINITY_DN77897_c1_g10	1	p2	(GA)6	12	81	92
TRINITY_DN77522_c4_g4	1	p1	(A)11	11	1	11
TRINITY_DN66408_c0_g1	1	p2	(TC)7	14	127	140
TRINITY_DN75225_c3_g2	1	c	(TA)6cgactacaattcagactctataattcaaacgcggcatcaaagaggcaacacccacaaactatccacacaata(AC)7	98	135	232
TRINITY_DN75225_c3_g1	1	p2	(AC)6	12	65	76
TRINITY_DN159899_c0_g1	1	p3	(ACA)5	15	44	58
TRINITY_DN31758_c0_g1	1	p2	(TG)8	16	228	243
TRINITY_DN168192_c0_g1	1	p1	(T)11	11	526	536
TRINITY_DN79269_c0_g1	1	p1	(T)12	12	226	237
TRINITY_DN74327_c1_g1	1	p2	(AT)6	12	1274	1285
TRINITY_DN74327_c1_g1	2	p1	(T)15	15	1857	1871
TRINITY_DN74327_c1_g3	1	p1	(A)12	12	91	102
TRINITY_DN82904_c1_g1	1	p2	(CT)17	34	85	118
TRINITY_DN82904_c1_g1	2	p1	(C)10	10	336	345
TRINITY_DN93647_c3_g2	1	p1	(A)11	11	670	680
TRINITY_DN86090_c3_g1	1	p2	(GA)10	20	146	165
TRINITY_DN75637_c0_g1	1	p1	(T)25	25	289	313
TRINITY_DN91380_c0_g1	1	p2	(TC)17	34	816	849
TRINITY_DN74728_c1_g1	1	p1	(A)10	10	13	22
TRINITY_DN74728_c1_g4	1	p1	(G)11	11	487	497
TRINITY_DN74728_c1_g5	1	p1	(T)21	21	1119	1139
TRINITY_DN77444_c1_g1	1	c	(GA)16gggaggagggaggaagcgagggagggagagagcgagacagagagagatat(AG)7	96	319	414
TRINITY_DN126003_c0_g1	1	p1	(A)10	10	156	165
TRINITY_DN16761_c0_g1	1	p1	(A)11	11	207	217
TRINITY_DN79095_c2_g2	1	p3	(TGC)5	15	499	513
TRINITY_DN79095_c2_g1	1	c	(TC)7cttcaattgc(CT)8	40	537	576
TRINITY_DN79095_c2_g6	1	p2	(GA)7	14	282	295
TRINITY_DN79095_c2_g5	1	p3	(TGC)5	15	569	583
TRINITY_DN76059_c0_g1	1	p2	(AT)11	22	372	393
TRINITY_DN80562_c0_g2	1	c	(TC)6(CT)6	24	54	77
TRINITY_DN80562_c0_g1	1	p2	(CT)11	22	163	184
TRINITY_DN80562_c0_g1	2	p1	(T)12	12	2913	2924
TRINITY_DN80562_c0_g1	3	p1	(A)10	10	3115	3124
TRINITY_DN74207_c0_g1	1	p1	(T)17	17	3600	3616
TRINITY_DN75264_c2_g2	1	c	(A)11gg(A)11	24	5	28
TRINITY_DN88372_c0_g1	1	p1	(T)11	11	356	366
TRINITY_DN85951_c0_g2	1	p1	(T)10	10	77	86
TRINITY_DN68512_c0_g1	1	p1	(A)13	13	900	912
TRINITY_DN68512_c0_g1	2	c	(TA)9gttagta(TG)6	37	2147	2183
TRINITY_DN80964_c3_g1	1	p2	(TA)9	18	461	478
TRINITY_DN83972_c0_g1	1	p1	(T)12	12	188	199
TRINITY_DN80964_c3_g2	1	p2	(AT)9	18	1272	1289
TRINITY_DN107039_c0_g1	1	p1	(A)10	10	247	256
TRINITY_DN92632_c0_g1	1	p1	(T)10	10	646	655
TRINITY_DN76378_c2_g2	1	p1	(A)12	12	141	152
TRINITY_DN94490_c0_g3	1	p2	(GA)6	12	176	187
TRINITY_DN85456_c1_g2	1	p1	(A)15	15	46	60
TRINITY_DN5775_c0_g1	1	p1	(T)10	10	171	180
TRINITY_DN85456_c1_g1	1	p1	(T)17	17	307	323
TRINITY_DN85456_c1_g1	2	p1	(A)10	10	431	440
TRINITY_DN103477_c0_g1	1	p1	(T)10	10	281	290
TRINITY_DN74907_c1_g3	1	p2	(GA)11	22	630	651
TRINITY_DN74907_c1_g2	1	p1	(T)13	13	1386	1398
TRINITY_DN74247_c1_g1	1	p1	(A)10	10	2156	2165
TRINITY_DN74464_c0_g1	1	p1	(A)36	36	5	40
TRINITY_DN92703_c2_g1	1	c	(T)11g(T)10	22	288	309
TRINITY_DN75865_c1_g1	1	p2	(TC)19	38	133	170
TRINITY_DN75843_c0_g1	1	p1	(T)14	14	272	285
TRINITY_DN73365_c0_g2	1	p2	(TA)6	12	163	174
TRINITY_DN86568_c3_g2	1	p2	(AG)9	18	180	197
TRINITY_DN86568_c3_g1	1	p2	(AG)9	18	31	48
TRINITY_DN86568_c3_g4	1	p2	(GT)7	14	130	143
TRINITY_DN86568_c3_g4	2	p2	(AG)12	24	310	333
TRINITY_DN77634_c2_g2	1	p1	(T)11	11	11	21
TRINITY_DN70981_c0_g1	1	p1	(T)18	18	78	95
TRINITY_DN84569_c0_g2	1	p2	(AC)6	12	588	599
TRINITY_DN96146_c0_g2	1	p3	(ATA)8	24	481	504
TRINITY_DN70520_c3_g1	1	p1	(T)10	10	242	251
TRINITY_DN90312_c0_g2	1	p2	(AT)16	32	482	513
TRINITY_DN76459_c5_g3	1	p1	(A)13	13	1	13
TRINITY_DN76459_c5_g1	1	p1	(T)12	12	66	77
TRINITY_DN76459_c5_g1	2	p1	(A)10	10	1736	1745
TRINITY_DN73235_c2_g1	1	p2	(TA)19	38	942	979
TRINITY_DN87593_c0_g4	1	p2	(CA)9	18	119	136
TRINITY_DN93855_c0_g1	1	p1	(A)11	11	14	24
TRINITY_DN85225_c1_g2	1	p2	(CT)9	18	267	284
TRINITY_DN93613_c1_g1	1	p3	(AAG)5	15	654	668
TRINITY_DN53257_c0_g1	1	c	(A)10cgaaacaaaacaagcagtcccacctttcttgtcatcacgtgcgtgtgttgatctctttttttttcgagttgatccaacttacgtcatagctgac(A)10	114	14	127
TRINITY_DN76760_c1_g4	1	p1	(A)12	12	296	307
TRINITY_DN70332_c2_g10	1	p1	(T)10	10	90	99
TRINITY_DN84504_c0_g2	1	p1	(A)10	10	119	128
TRINITY_DN81534_c1_g1	1	p2	(GT)6	12	373	384
TRINITY_DN81534_c1_g1	2	p1	(A)12	12	1139	1150
TRINITY_DN98224_c2_g3	1	p1	(A)29	29	16	44
TRINITY_DN91596_c2_g1	1	p1	(A)15	15	1	15
TRINITY_DN93631_c0_g4	1	p1	(A)13	13	720	732
TRINITY_DN96874_c1_g4	1	p1	(A)10	10	97	106
TRINITY_DN171983_c0_g1	1	p3	(GGC)6	18	98	115
TRINITY_DN97857_c4_g2	1	p2	(AT)6	12	177	188
TRINITY_DN97857_c4_g1	1	p2	(GA)9	18	2437	2454
TRINITY_DN96092_c0_g2	1	p1	(T)11	11	19	29
TRINITY_DN85196_c1_g1	1	p1	(T)11	11	785	795
TRINITY_DN81805_c1_g2	1	p2	(GA)7	14	1112	1125
TRINITY_DN81805_c1_g1	1	c	(TC)15ca(TC)7	46	131	176
TRINITY_DN81805_c1_g1	2	p1	(T)10	10	913	922
TRINITY_DN81805_c1_g4	1	p2	(GA)6	12	356	367
TRINITY_DN121492_c0_g1	1	p1	(T)10	10	233	242
TRINITY_DN94350_c0_g1	1	c	(TC)8cctcccccc(CT)12gtgtgtcctccatttcttcaaaaaatatgaactagttctaattgagttcaaaattttaaatcgatgactgacatttctac(T)14	143	71	213
TRINITY_DN91723_c0_g1	1	p2	(TA)7	14	709	722
TRINITY_DN71659_c1_g4	1	c	(TATG)5atactaggtgcattgtctgtgtttgatgttggtatttattactattgggcatggtatcatg(GT)6	93	949	1041
TRINITY_DN186397_c0_g1	1	p1	(A)11	11	31	41
TRINITY_DN45965_c0_g1	1	p2	(TC)6	12	323	334
TRINITY_DN62181_c0_g1	1	p1	(G)10	10	98	107
TRINITY_DN96535_c1_g1	1	p1	(A)11	11	115	125
TRINITY_DN208380_c0_g1	1	p1	(T)16	16	291	306
TRINITY_DN95070_c3_g2	1	p1	(T)17	17	5	21
TRINITY_DN95070_c3_g2	2	p2	(CT)8	16	373	388
TRINITY_DN87263_c0_g2	1	p1	(T)10	10	765	774
TRINITY_DN90972_c5_g1	1	p2	(AC)8	16	295	310
TRINITY_DN88059_c2_g1	1	c	(A)13caaaaatt(A)15	36	1	36
TRINITY_DN84276_c0_g3	1	c	(A)13c(A)10	24	274	297
TRINITY_DN94630_c1_g1	1	p2	(TA)7	14	3127	3140
TRINITY_DN97071_c0_g1	1	p2	(AT)8	16	447	462
TRINITY_DN45397_c0_g1	1	p1	(T)12	12	88	99
TRINITY_DN73595_c1_g1	1	p1	(A)13	13	15	27
TRINITY_DN56663_c0_g1	1	p3	(CAG)5	15	534	548
TRINITY_DN69656_c1_g4	1	p1	(A)10	10	19	28
TRINITY_DN69656_c1_g4	2	p1	(T)11	11	138	148
TRINITY_DN69656_c1_g5	1	p1	(A)10	10	970	979
TRINITY_DN80689_c0_g2	1	p1	(A)11	11	1127	1137
TRINITY_DN80689_c0_g3	1	p3	(AGC)6	18	881	898
TRINITY_DN97719_c1_g3	1	p1	(T)13	13	41	53
TRINITY_DN97719_c1_g3	2	p5	(AGACG)5	25	220	244
TRINITY_DN97719_c1_g2	1	p1	(A)13	13	222	234
TRINITY_DN80265_c2_g1	1	p2	(AT)6	12	141	152
TRINITY_DN88620_c0_g6	1	p2	(CT)7	14	70	83
TRINITY_DN88620_c0_g4	1	p2	(TC)11	22	114	135
TRINITY_DN78018_c0_g2	1	p1	(T)10	10	347	356
TRINITY_DN80717_c0_g4	1	c	(GT)7aaccaggtgtgggtgcgtgcgtattcccttgttctgagttctgttcaagctgggtaactatgttgtggtaca(GT)6	98	20	117
TRINITY_DN80717_c0_g1	1	p1	(G)13	13	516	528
TRINITY_DN80717_c0_g3	1	p2	(TG)6	12	1	12
TRINITY_DN171631_c0_g1	1	p1	(T)12	12	340	351
TRINITY_DN79291_c2_g2	1	p2	(TG)10	20	1341	1360
TRINITY_DN79291_c2_g6	1	p2	(TG)10	20	76	95
TRINITY_DN78296_c3_g1	1	p2	(AT)8	16	1512	1527
TRINITY_DN91965_c0_g1	1	c	(GT)8gaataggtgggtggatttttggtagatcttgtgattttattcagatacaaatt(GA)8	85	65	149
TRINITY_DN82716_c2_g4	1	p1	(T)11	11	691	701
TRINITY_DN95550_c0_g6	1	p2	(TG)6	12	84	95
TRINITY_DN95550_c0_g5	1	c	(GA)11gggaaatataaaccagctataattcctttgaaccccaattgaacccatgtcccaattgagccctaaagcagcttgtaac(GA)6	113	101	213
TRINITY_DN80593_c0_g2	1	p1	(T)10	10	3428	3437
TRINITY_DN80593_c0_g3	1	p1	(A)12	12	69	80
TRINITY_DN61623_c0_g1	1	p1	(A)10	10	541	550
TRINITY_DN85756_c0_g1	1	p2	(AT)10	20	291	310
TRINITY_DN85756_c0_g1	2	p2	(TA)6	12	785	796
TRINITY_DN87427_c1_g1	1	p2	(GT)6	12	256	267
TRINITY_DN85756_c0_g4	1	p2	(AT)6	12	83	94
TRINITY_DN85756_c0_g5	1	p2	(AT)10	20	54	73
TRINITY_DN75078_c2_g1	1	p1	(A)13	13	51	63
TRINITY_DN76887_c0_g4	1	p1	(A)10	10	50	59
TRINITY_DN80780_c2_g1	1	p1	(A)10	10	435	444
TRINITY_DN77456_c0_g1	1	c	(T)10a(T)11	22	79	100
TRINITY_DN97301_c0_g1	1	p1	(G)12	12	215	226
TRINITY_DN131072_c0_g1	1	p3	(CAG)6	18	162	179
TRINITY_DN87833_c0_g3	1	p1	(A)10	10	104	113
TRINITY_DN80646_c2_g2	1	p3	(CTT)5	15	428	442
TRINITY_DN96272_c3_g7	1	p2	(TA)6	12	108	119
TRINITY_DN93158_c2_g6	1	p2	(AT)6	12	268	279
TRINITY_DN93158_c2_g5	1	p1	(A)13	13	18	30
TRINITY_DN84249_c1_g4	1	p1	(T)21	21	1	21
TRINITY_DN84249_c1_g4	2	p1	(T)25	25	138	162
TRINITY_DN84249_c1_g4	3	p1	(T)23	23	279	301
TRINITY_DN67156_c0_g1	1	p2	(TA)7	14	425	438
TRINITY_DN94034_c0_g4	1	p1	(A)16	16	261	276
TRINITY_DN72483_c0_g1	1	p1	(T)10	10	397	406
TRINITY_DN166740_c0_g1	1	p1	(T)11	11	183	193
TRINITY_DN97262_c0_g2	1	p2	(GA)12	24	1445	1468
TRINITY_DN66303_c0_g1	1	p2	(TA)8	16	53	68
TRINITY_DN78782_c0_g2	1	p2	(GA)7	14	139	152
TRINITY_DN78782_c0_g2	2	p2	(TA)11	22	1096	1117
TRINITY_DN89515_c2_g3	1	p2	(GA)11	22	41	62
TRINITY_DN89515_c2_g3	2	c	(GTGA)5atggggatcaaattaataaattatgg(GA)7ggtcataggacaataagatgtatagt(GA)11	108	176	283
TRINITY_DN89515_c2_g2	1	c	(GA)7a(AG)15	45	488	532
TRINITY_DN96890_c1_g2	1	p3	(AAG)5	15	1076	1090
TRINITY_DN46448_c0_g1	1	p2	(GA)6	12	915	926
TRINITY_DN96583_c1_g1	1	p2	(CT)12	24	147	170
TRINITY_DN99007_c6_g1	1	p2	(AC)8	16	34	49
TRINITY_DN97541_c1_g2	1	c	(GA)6ggagggggagagagg(GA)6	39	717	755
TRINITY_DN93106_c0_g1	1	p2	(CT)9	18	12	29
TRINITY_DN73298_c5_g1	1	p1	(T)17	17	28	44
TRINITY_DN122901_c0_g1	1	p1	(A)19	19	278	296
TRINITY_DN95656_c1_g4	1	p2	(CT)9	18	7	24
TRINITY_DN95656_c1_g4	2	p2	(TA)10	20	255	274
TRINITY_DN81500_c1_g2	1	p1	(A)10	10	210	219
TRINITY_DN81477_c2_g1	1	p2	(GA)9	18	406	423
TRINITY_DN81477_c2_g1	2	p1	(T)10	10	934	943
TRINITY_DN91744_c1_g1	1	p1	(A)22	22	352	373
TRINITY_DN74217_c1_g2	1	p2	(AT)10	20	218	237
TRINITY_DN93088_c2_g4	1	p1	(A)13	13	1	13
TRINITY_DN76996_c0_g2	1	c	(T)11gagtgttgtgattc(A)12	37	71	107
TRINITY_DN70338_c0_g1	1	p1	(A)12	12	189	200
TRINITY_DN79892_c0_g3	1	p1	(T)11	11	845	855
TRINITY_DN96858_c1_g1	1	p1	(A)14	14	48	61
TRINITY_DN79537_c0_g1	1	p3	(TCT)5	15	453	467
TRINITY_DN93010_c0_g1	1	p2	(AT)12	24	43	66
TRINITY_DN121459_c0_g1	1	p1	(T)10	10	100	109
TRINITY_DN128150_c0_g1	1	p2	(TA)7	14	225	238
TRINITY_DN82144_c0_g2	1	p2	(AT)8	16	1059	1074
TRINITY_DN82144_c0_g3	1	p2	(AG)12	24	167	190
TRINITY_DN82144_c0_g8	1	p2	(CA)6	12	883	894
TRINITY_DN97896_c2_g1	1	p1	(T)18	18	198	215
TRINITY_DN88820_c1_g2	1	p2	(AC)13	26	1027	1052
TRINITY_DN88820_c1_g2	2	p2	(AG)7	14	1453	1466
TRINITY_DN95128_c2_g1	1	c	(A)10ttgttgtcgaccatgaggttggtagcaataaaaaaaatgaatgagaaaaaaaaagacaaaagaagaaaagaaaagggattaaaaaaaaagatgtcag(A)10	117	67	183
TRINITY_DN78750_c1_g2	1	p2	(GT)6	12	42	53
TRINITY_DN70542_c0_g1	1	p2	(GA)10	20	2226	2245
TRINITY_DN97859_c3_g4	1	c	(TG)10tca(GT)9	41	357	397
TRINITY_DN68541_c1_g1	1	p1	(A)10	10	653	662
TRINITY_DN160659_c0_g1	1	p1	(T)13	13	368	380
TRINITY_DN84976_c1_g4	1	p1	(A)15	15	228	242
TRINITY_DN79180_c0_g1	1	p2	(GA)7	14	324	337
TRINITY_DN79180_c0_g1	2	p2	(AG)8	16	469	484
TRINITY_DN81158_c0_g6	1	p1	(T)23	23	106	128
TRINITY_DN83086_c2_g6	1	p2	(AC)6	12	54	65
TRINITY_DN83086_c2_g2	1	p2	(AC)7	14	73	86
TRINITY_DN83086_c2_g3	1	p2	(AC)7	14	318	331
TRINITY_DN77588_c1_g1	1	p1	(A)10	10	435	444
TRINITY_DN77588_c1_g1	2	p1	(A)10	10	559	568
TRINITY_DN67490_c1_g4	1	p3	(GTG)5	15	314	328
TRINITY_DN77331_c1_g1	1	c	(A)10cacataataaaatgaaaatcttacaactaaaactttgatgaaatatatacccttgccttgtacatatttgaggctttatattcatcttttaaa(TGT)6	121	222	342
TRINITY_DN77331_c1_g1	2	p2	(GA)13	26	2081	2106
TRINITY_DN72929_c1_g1	1	p2	(GA)14	28	127	154
TRINITY_DN68790_c0_g1	1	p2	(GT)7	14	3844	3857
TRINITY_DN69990_c0_g1	1	p2	(TC)6	12	50	61
TRINITY_DN69990_c0_g1	2	p2	(GT)6	12	352	363
TRINITY_DN68790_c0_g3	1	p2	(GA)6	12	399	410
TRINITY_DN68790_c0_g2	1	p2	(GA)7	14	229	242
TRINITY_DN69990_c0_g4	1	p2	(GT)6	12	354	365
TRINITY_DN69990_c0_g6	1	c	(TG)7tacagattatgagtgtgtgtatgtggcgacctctgtgtatgttgttgtgttcagtcccctgccttggccatcaacaattgt(TG)8	111	362	472
TRINITY_DN69990_c0_g9	1	p2	(TG)6	12	21	32
TRINITY_DN88449_c1_g4	1	p2	(AT)12	24	57	80
TRINITY_DN158238_c0_g1	1	p1	(A)11	11	38	48
TRINITY_DN82531_c1_g1	1	c	(TA)7ttttttttctttttctga(T)26	58	265	322
TRINITY_DN78883_c1_g1	1	p3	(AAG)10	30	183	212
TRINITY_DN78883_c1_g2	1	p1	(G)14	14	807	820
TRINITY_DN78883_c1_g2	2	p1	(A)11	11	1086	1096
TRINITY_DN78883_c1_g3	1	p1	(A)10	10	208	217
TRINITY_DN87812_c0_g3	1	p1	(T)14	14	57	70
TRINITY_DN87812_c0_g3	2	p2	(GA)8	16	2052	2067
TRINITY_DN87812_c0_g7	1	p1	(T)14	14	57	70
TRINITY_DN87812_c0_g5	1	p2	(GA)11	22	1	22
TRINITY_DN87812_c0_g5	2	p2	(GA)7	14	140	153
TRINITY_DN113743_c0_g1	1	p1	(G)14	14	547	560
TRINITY_DN93443_c1_g2	1	p2	(CA)6	12	526	537
TRINITY_DN93443_c1_g2	2	p2	(AT)7	14	786	799
TRINITY_DN78208_c3_g1	1	p1	(A)10	10	1232	1241
TRINITY_DN88686_c1_g5	1	p3	(CTC)5	15	163	177
TRINITY_DN91980_c3_g1	1	p1	(T)10	10	279	288
TRINITY_DN88686_c1_g1	1	p1	(A)13	13	1313	1325
TRINITY_DN69384_c1_g1	1	p1	(T)12	12	91	102
TRINITY_DN76061_c1_g2	1	p3	(GTG)6	18	547	564
TRINITY_DN84708_c1_g1	1	p1	(T)22	22	1097	1118
TRINITY_DN76061_c1_g1	1	p1	(A)20	20	191	210
TRINITY_DN88692_c0_g3	1	p2	(TG)6	12	1504	1515
TRINITY_DN91074_c1_g3	1	p1	(G)10	10	61	70
TRINITY_DN91074_c1_g1	1	p2	(CT)8	16	333	348
TRINITY_DN96192_c1_g1	1	p1	(T)12	12	68	79
TRINITY_DN72185_c0_g1	1	p2	(CT)12	24	187	210
TRINITY_DN72185_c0_g1	2	p1	(T)10	10	2875	2884
TRINITY_DN72185_c0_g4	1	p1	(A)10	10	140	149
TRINITY_DN70302_c0_g1	1	p1	(A)11	11	4	14
TRINITY_DN70302_c0_g2	1	p1	(A)14	14	337	350
TRINITY_DN78138_c2_g2	1	c	(CT)6ttctctctccctgtcc(CT)16	60	12	71
TRINITY_DN78138_c2_g2	2	p1	(A)28	28	2016	2043
TRINITY_DN94528_c0_g1	1	p2	(CT)7	14	1395	1408
TRINITY_DN62033_c0_g1	1	p1	(A)10	10	504	513
TRINITY_DN74821_c0_g3	1	p2	(CA)6	12	295	306
TRINITY_DN77623_c2_g2	1	p2	(CA)6	12	602	613
TRINITY_DN69566_c0_g1	1	p1	(A)10	10	58	67
TRINITY_DN96690_c1_g1	1	p2	(AG)9	18	163	180
TRINITY_DN55794_c0_g1	1	p3	(CGC)8	24	80	103
TRINITY_DN97341_c1_g1	1	p2	(GA)7	14	1	14
TRINITY_DN89307_c1_g3	1	p1	(A)17	17	58	74
TRINITY_DN88457_c0_g1	1	p2	(TC)9	18	824	841
TRINITY_DN88663_c0_g2	1	p2	(TG)6	12	319	330
TRINITY_DN95183_c1_g1	1	c	(CT)6cccgtctctccctctctcc(CT)6	43	40	82
TRINITY_DN54044_c0_g2	1	p3	(CAA)5	15	5	19
TRINITY_DN85659_c1_g1	1	p2	(AC)6	12	495	506
TRINITY_DN85659_c1_g1	2	p2	(AG)6	12	778	789
TRINITY_DN79102_c0_g1	1	p1	(A)10	10	179	188
TRINITY_DN74812_c0_g1	1	p2	(AG)6	12	725	736
TRINITY_DN69232_c2_g1	1	p2	(TA)11	22	15	36
TRINITY_DN69232_c2_g3	1	p2	(GA)8	16	1574	1589
TRINITY_DN94585_c0_g2	1	p1	(T)10	10	1660	1669
TRINITY_DN89911_c3_g4	1	c	(GA)7tgagagagtgagggagagagaactggcgagagatgc(AG)6acagagatgcagagagggagagggagagg(GA)9	109	267	375
TRINITY_DN89911_c3_g2	1	p2	(AG)7	14	51	64
TRINITY_DN89911_c3_g3	1	p1	(A)10	10	248	257
TRINITY_DN97975_c3_g5	1	p1	(A)13	13	143	155
TRINITY_DN74121_c0_g1	1	p2	(CA)8	16	68	83
TRINITY_DN86919_c0_g1	1	p1	(A)15	15	2847	2861
TRINITY_DN85772_c0_g3	1	p1	(T)10	10	10	19
TRINITY_DN74252_c3_g1	1	p1	(A)10	10	151	160
TRINITY_DN167077_c0_g1	1	p3	(CTG)5	15	190	204
TRINITY_DN91884_c2_g4	1	p2	(AT)8	16	73	88
TRINITY_DN111190_c0_g1	1	p3	(CTC)5	15	78	92
TRINITY_DN84776_c0_g1	1	p1	(T)11	11	547	557
TRINITY_DN73139_c0_g1	1	p2	(TC)7	14	1076	1089
TRINITY_DN86552_c1_g1	1	p1	(A)12	12	2358	2369
TRINITY_DN76990_c0_g1	1	p1	(A)10	10	448	457
TRINITY_DN153215_c0_g1	1	p1	(A)18	18	1	18
TRINITY_DN80483_c2_g1	1	p1	(A)10	10	90	99
TRINITY_DN75581_c1_g2	1	p1	(T)17	17	343	359
TRINITY_DN69116_c0_g1	1	c	(T)10gaaagtagacttttct(TTC)5	41	9	49
TRINITY_DN182815_c0_g1	1	p3	(CCT)5	15	99	113
TRINITY_DN81317_c1_g1	1	p1	(A)13	13	2040	2052
TRINITY_DN81317_c1_g6	1	p2	(AC)6	12	150	161
TRINITY_DN41835_c0_g1	1	p1	(T)10	10	6	15
TRINITY_DN92414_c0_g3	1	p2	(TG)6	12	528	539
TRINITY_DN84647_c1_g2	1	p2	(GT)8	16	183	198
TRINITY_DN86741_c1_g2	1	p2	(TA)15	30	1	30
TRINITY_DN92115_c3_g2	1	p1	(A)24	24	1	24
TRINITY_DN93069_c0_g2	1	p1	(A)12	12	670	681
TRINITY_DN76370_c2_g2	1	p1	(T)11	11	758	768
TRINITY_DN76370_c2_g2	2	p1	(A)11	11	3717	3727
TRINITY_DN96615_c1_g1	1	p2	(GA)11	22	148	169
TRINITY_DN96447_c1_g3	1	p1	(T)14	14	437	450
TRINITY_DN67567_c0_g1	1	p1	(A)10	10	60	69
TRINITY_DN67567_c0_g1	2	p1	(A)10	10	208	217
TRINITY_DN83574_c1_g1	1	c	(GA)8aagagagg(GA)6	36	1864	1899
TRINITY_DN83574_c1_g1	2	p1	(G)11	11	3357	3367
TRINITY_DN74928_c0_g3	1	p1	(A)11	11	604	614
TRINITY_DN79214_c1_g1	1	p2	(AC)6	12	217	228
TRINITY_DN101994_c0_g1	1	p1	(A)13	13	215	227
TRINITY_DN91771_c1_g2	1	p2	(AT)7	14	43	56
TRINITY_DN71741_c2_g6	1	p2	(TA)6	12	107	118
TRINITY_DN90930_c0_g1	1	p2	(GA)6	12	76	87
TRINITY_DN90930_c0_g1	2	p1	(A)12	12	2258	2269
TRINITY_DN89822_c0_g8	1	p2	(AT)6	12	827	838
TRINITY_DN89822_c0_g7	1	p1	(A)10	10	210	219
TRINITY_DN77555_c3_g4	1	p2	(GA)6	12	284	295
TRINITY_DN82573_c1_g5	1	p2	(CT)11	22	96	117
TRINITY_DN82573_c1_g7	1	p2	(CT)7	14	9	22
TRINITY_DN89319_c1_g1	1	p1	(T)13	13	243	255
TRINITY_DN82685_c3_g2	1	p1	(A)10	10	1935	1944
TRINITY_DN82685_c3_g2	2	p2	(CA)9	18	2113	2130
TRINITY_DN93711_c1_g1	1	p1	(T)17	17	83	99
TRINITY_DN94965_c0_g2	1	p2	(GA)6	12	65	76
TRINITY_DN52254_c0_g1	1	p1	(A)17	17	1	17
TRINITY_DN72164_c2_g1	1	p2	(TA)6	12	272	283
TRINITY_DN72164_c2_g1	2	p1	(T)12	12	446	457
TRINITY_DN29403_c0_g1	1	p2	(TC)6	12	39	50
TRINITY_DN87636_c1_g2	1	c	(TG)9cggatatatattttcttcctaggtaattatggaccattggaccggaatgagctgttcagtttattctatgccacgaggatattttttga(T)10	117	1050	1166
TRINITY_DN93849_c1_g1	1	p1	(T)11	11	113	123
TRINITY_DN93849_c1_g3	1	p1	(A)18	18	2116	2133
TRINITY_DN75931_c1_g4	1	p1	(A)11	11	424	434
TRINITY_DN75338_c0_g1	1	p1	(T)10	10	278	287
TRINITY_DN83984_c1_g2	1	p1	(T)13	13	83	95
TRINITY_DN86684_c3_g1	1	p2	(AT)8	16	432	447
TRINITY_DN81274_c4_g1	1	p1	(T)10	10	295	304
TRINITY_DN94490_c0_g1	1	p3	(ATT)5	15	35	49
TRINITY_DN86151_c0_g3	1	p2	(GA)7	14	117	130
TRINITY_DN81013_c0_g1	1	p1	(T)11	11	208	218
TRINITY_DN81013_c0_g5	1	p1	(A)10	10	32	41
TRINITY_DN75788_c1_g6	1	p1	(G)10	10	186	195
TRINITY_DN75788_c1_g6	2	p2	(GA)7	14	773	786
TRINITY_DN90117_c2_g1	1	p1	(A)10	10	1311	1320
TRINITY_DN90117_c2_g2	1	p1	(T)10	10	232	241
TRINITY_DN60103_c0_g1	1	p3	(GCT)6	18	98	115
TRINITY_DN75788_c1_g2	1	p1	(A)11	11	69	79
TRINITY_DN75506_c0_g3	1	p1	(A)16	16	673	688
TRINITY_DN75939_c5_g2	1	p2	(TC)10	20	61	80
TRINITY_DN75939_c5_g2	2	p1	(T)11	11	804	814
TRINITY_DN79857_c1_g1	1	p2	(AG)17	34	54	87
TRINITY_DN79857_c1_g2	1	p2	(CT)9	18	44	61
TRINITY_DN93108_c2_g1	1	p2	(CT)8	16	58	73
TRINITY_DN99007_c9_g1	1	p2	(GT)8	16	56	71
TRINITY_DN99007_c9_g1	2	p2	(GT)6	12	310	321
TRINITY_DN83628_c1_g1	1	p1	(T)16	16	1331	1346
TRINITY_DN196373_c0_g1	1	p1	(T)12	12	175	186
TRINITY_DN83628_c1_g2	1	p1	(T)14	14	131	144
TRINITY_DN68013_c0_g1	1	p1	(A)11	11	1576	1586
TRINITY_DN68013_c0_g1	2	p2	(AG)12	24	3374	3397
TRINITY_DN72619_c1_g1	1	p2	(TC)7	14	12	25
TRINITY_DN72619_c1_g2	1	p2	(TC)6	12	160	171
TRINITY_DN81279_c0_g1	1	p2	(AG)9	18	20	37
TRINITY_DN88503_c0_g1	1	p2	(TC)8	16	135	150
TRINITY_DN163522_c0_g1	1	p1	(T)13	13	19	31
TRINITY_DN36470_c0_g1	1	p1	(T)14	14	308	321
TRINITY_DN75641_c2_g6	1	p3	(CCA)5	15	117	131
TRINITY_DN75641_c2_g8	1	p3	(ACC)5	15	117	131
TRINITY_DN68827_c2_g1	1	c	(T)11c(T)11	23	220	242
TRINITY_DN77353_c0_g5	1	p2	(AC)6	12	36	47
TRINITY_DN62563_c0_g1	1	p1	(T)10	10	524	533
TRINITY_DN81698_c0_g2	1	p1	(T)10	10	326	335
TRINITY_DN198210_c0_g1	1	p3	(TCA)5	15	55	69
TRINITY_DN75684_c0_g1	1	p2	(AT)10	20	225	244
TRINITY_DN95425_c0_g1	1	p1	(T)12	12	160	171
TRINITY_DN95051_c1_g2	1	p1	(A)18	18	30	47
TRINITY_DN178900_c0_g1	1	p1	(T)11	11	238	248
TRINITY_DN73025_c2_g1	1	p1	(A)10	10	475	484
TRINITY_DN74020_c0_g6	1	p1	(T)10	10	840	849
TRINITY_DN74124_c1_g2	1	p1	(A)10	10	522	531
TRINITY_DN79517_c3_g1	1	p2	(GT)7	14	32	45
TRINITY_DN79517_c3_g1	2	c	(GT)8gcatgcgttacgtgtgtatatttatgtcgtgtgagtgagctttgttgctgggtttgtggttcgagttttgttgttatgaccgtaatgttaattcacaa(T)10	124	345	468
TRINITY_DN71812_c2_g5	1	p2	(AC)7	14	85	98
TRINITY_DN73838_c0_g1	1	p2	(AC)6	12	105	116
TRINITY_DN73838_c0_g1	2	c	(TC)6tatctca(CT)6	31	263	293
TRINITY_DN73838_c0_g2	1	p1	(G)10	10	1	10
TRINITY_DN215418_c0_g1	1	p1	(A)12	12	23	34
TRINITY_DN94511_c2_g3	1	p2	(GA)12	24	1499	1522
TRINITY_DN98328_c0_g3	1	p1	(T)11	11	907	917
TRINITY_DN92257_c2_g2	1	p1	(T)11	11	16	26
TRINITY_DN92257_c2_g3	1	p2	(GA)6	12	61	72
TRINITY_DN92257_c2_g3	2	c	(TGA)5gggtaaggtggtgc(GT)7ttcttcttctaccctctttttctttctttgtgggggtggattttatttttttgccttcttggaagatagaa(TAG)5gaaagtgatgtgtactaaccctatataaatatagtaggaaagctttgctgaaaaggtaagagaaggagagagagtaagagagagta(AG)9	233	522	754
TRINITY_DN82261_c1_g3	1	p2	(TA)11	22	1	22
TRINITY_DN82261_c1_g1	1	p2	(AT)13	26	230	255
TRINITY_DN78665_c0_g2	1	p1	(T)10	10	2	11
TRINITY_DN88901_c3_g3	1	c	(CT)14cgctttctccctcc(CT)11	64	1	64
TRINITY_DN26903_c0_g1	1	p2	(GT)13	26	5	30
TRINITY_DN76213_c2_g1	1	p1	(A)10	10	10	19
TRINITY_DN101339_c0_g1	1	p2	(CT)6	12	382	393
TRINITY_DN99037_c8_g2	1	p1	(T)10	10	666	675
TRINITY_DN98541_c0_g2	1	p1	(T)14	14	346	359
TRINITY_DN92468_c2_g5	1	p1	(T)16	16	220	235
TRINITY_DN92468_c2_g5	2	p1	(T)10	10	415	424
TRINITY_DN73613_c2_g1	1	p2	(TG)6	12	1205	1216
TRINITY_DN73613_c2_g2	1	p2	(TC)9	18	1	18
TRINITY_DN73613_c2_g2	2	p1	(T)13	13	303	315
TRINITY_DN80909_c3_g1	1	p1	(T)10	10	702	711
TRINITY_DN94227_c0_g3	1	p2	(GA)11	22	187	208
TRINITY_DN195420_c0_g1	1	p1	(T)11	11	212	222
TRINITY_DN87542_c0_g3	1	p2	(TA)7	14	472	485
TRINITY_DN87542_c0_g3	2	p1	(A)21	21	1988	2008
TRINITY_DN87542_c0_g4	1	c	(T)10gttggttagaaacgcaagtttagagtatgttttcaaaggcccaacgccactttattgtggcgttcgggtgttttaacc(T)14	102	248	349
TRINITY_DN69157_c0_g3	1	p1	(T)10	10	1748	1757
TRINITY_DN83034_c0_g3	1	p3	(ATA)5	15	411	425
TRINITY_DN83034_c0_g1	1	p2	(AT)7	14	55	68
TRINITY_DN88883_c0_g1	1	p1	(T)13	13	85	97
TRINITY_DN74935_c0_g1	1	p2	(AT)6	12	93	104
TRINITY_DN90250_c0_g1	1	p1	(T)15	15	976	990
TRINITY_DN21975_c0_g1	1	p1	(A)11	11	81	91
TRINITY_DN94307_c0_g2	1	p2	(GA)11	22	1221	1242
TRINITY_DN94307_c0_g4	1	p2	(GA)14	28	270	297
[truncated: 36,886 more rows]
